# Supplementary material for: Preventing recurrence in Sonic Hedgehog Subgroup Medulloblastoma using OLIG2 inhibitor CT-179
Source: Research Square preprint supplement (doi:10.21203/rs.3.rs-2949436/v1), 2023-06-09
Supplement: Supplementary file 1 [file 219d1374985a0c74c06fe5bf.xlsx]

## Sheet: Kinomescan
	Inhibition of various kinases with 1 µM CT-179				Inhibition of a secondary panel of kinases with 1 µM CT-179				CT-179 kinase IC50
	Kinase	Concentration (nM)	% Inhibition		Kinase	Concentration (nM)	% Inhibition		Kinase	IC50 (nM)
	ABL1 H396P	1000	47		ABL1 E255K	1000	28		kIT	800
	ABL1 M351T	1000	52		ABL1 G250E	1000	33		FLT3	20
	ABL1 Q252H	1000	44		ABL1 T315I	1000	-1		DDR2	>5000
	ACVR1 (ALK2) R206H	1000	24		ABL1 Y253F	1000	37
	ACVR1 (ALK2)	1000	16		ABL1	1000	36
	ACVR2A	1000	1		ABL2 (Arg)	1000	12
	ACVR2B	1000	-4		ACVR1B (ALK4)	1000	0
	ACVRL1 (ALK1)	1000	8		ADRBK1 (GRK2)	1000	1
	ALK C1156Y	1000	3		ADRBK2 (GRK3)	1000	-3
	ALK F1174L	1000	3		AKT1 (PKB alpha)	1000	2
	ALK L1196M	1000	3		AKT2 (PKB beta)	1000	1
	ALK R1275Q	1000	-3		AKT3 (PKB gamma)	1000	2
	AMPK (A1/B1/G2)	1000	2		ALK	1000	3
	AMPK (A1/B1/G3)	1000	0		AMPK A1/B1/G1	1000	-3
	AMPK (A1/B2/G1)	1000	2		AMPK A2/B1/G1	1000	9
	AMPK (A2/B2/G1)	1000	4		AURKA (Aurora A)	1000	-2
	AMPK (A2/B2/G2)	1000	2		AURKB (Aurora B)	1000	6
	AXL R499C	1000	-1		AURKC (Aurora C)	1000	6
	BMPR1A (ALK3)	1000	-6		AXL	1000	-8
	BMPR1B (ALK6)	1000	-2		BLK	1000	-4
	BMPR2	1000	-1		BMX	1000	4
	BRAF V599E	1000	-7		BRAF V599E	1000	2
	BRAF	1000	-4		BRAF	1000	3
	BRSK2	1000	1		BRSK1 (SAD1)	1000	-1
	CAMK2G (CaMKII gamma)	1000	6		BTK	1000	-2
	CAMKK1 (CAMKKA)	1000	-1		CAMK1D (CaMKI delta)	1000	4
	CAMKK2 (CaMKK beta)	1000	4		CAMK2A (CaMKII alpha)	1000	0
	CASK	1000	-4		CAMK2B (CaMKII beta)	1000	6
	CDC7/DBF4	1000	30		CAMK2D (CaMKII delta)	1000	21
	CDK1/cyclin A2	1000	5		CAMK4 (CaMKIV) 1000 2	1000	2
	CDK11 (Inactive)	1000	0		CDC42 BPA (MRCKA)	1000	-3
	CDK14 (PFTK1)/cyclin Y	1000	0		CDC42 BPB (MRCKB)	1000	-5
	CDK16 (PCTK1)/cyclin Y	1000	2		CDK1/cyclin B	1000	2
	CDK2/cyclin A1	1000	-8		CDK2/cyclin A	1000	-2
	CDK2/cyclin A2	1000	0		CDK5/p25	1000	3
	CDK2/cyclin E1	1000	0		CDK5/p35	1000	-1
	CDK2/cyclin O	1000	-7		CHEK1 (CHK1)	1000	-2
	CDK3/cyclin E1	1000	2		CHEK2 (CHK2)	1000	-3
	CDK5 (Inactive)	1000	-4		CLK1	1000	14
	CDK8/cyclin C	1000	5		CLK2	1000	26
	CDK9 (Inactive)	1000	10		CLK3	1000	2
	CDK9/cyclin K	1000	4		CSF1R (FMS)	1000	30
	CLK4	1000	40		CSK	1000	4
	DAPK2	1000	12		CSNK1A1 (CK1 alpha 1)	1000	-1
	DDR1	1000	9		CSNK1D (CK1 delta)	1000	0
	DDR2 N456S	1000	87		CSNK1E (CK1 epsilon)	1000	0
	DDR2 T654M	1000	65		CSNK1G1 (CK1 gamma 1)	1000	-3
	DDR2	1000	20		CSNK1G2 (CK1 gamma 2)	1000	-5
	DMPK	1000	0		CSNK1G3 (CK1 gamma 3)	1000	0
	DYRK2	1000	7		CSNK2A1 (CK2 alpha 1)	1000	-4
	EGFR (ErbB1) d746-750	1000	13		CSNK2A2 (CK2 alpha 2)	1000	-3
	EIF2AK2 (PKR)	1000	22		DAPK3 (ZIPK)	1000	1
	EPHA3	1000	-4		DCAMKL2 (DCK2)	1000	2
	EPHA6	1000	-12		DNA-PK	1000	1
	EPHA7	1000	-10		DYRK1A	1000	5
	FGFR1 V561M	1000	-2		DYRK1B	1000	5
	FGFR3 G697C	1000	5		DYRK3	1000	-2
	FGFR3 K650M	1000	3		DYRK4	1000	0
	FLT3 ITD	1000	78		EEF2K	1000	7
	FYN A	1000	26		EGFR (ErbB1) L858R	1000	-11
	GRK1	1000	-9		EGFR (ErbB1) L861Q	1000	-2
	ICK	1000	-5		EGFR (ErbB1) T790M L858R	1000	1
	KIT A829P	1000	-7		EGFR (ErbB1) T790M	1000	0
	KIT D816H	1000	5		EGFR (ErbB1)	1000	-3
	KIT D816V	1000	3		EPHA1	1000	1
	KIT D820E	1000	45		EPHA2	1000	-7
	KIT N822K	1000	30		EPHA4	1000	2
	KIT T670E	1000	41		EPHA5	1000	1
	KIT V559D T670I	1000	51		EPHA8	1000	-5
	KIT V654A	1000	66		EPHB1	1000	4
	KIT Y823D	1000	22		EPHB2	1000	8
	LATS1	1000	-5		EPHB3	1000	-2
	LATS2	1000	4		EPHB4	1000	0
	LIMK1	1000	-2		ERBB2 (HER2)	1000	-5
	LIMK2	1000	-1		ERBB4 (HER4)	1000	-6
	MAP2K1 (MEK1) S218D S222D	1000	3		FER	1000	3
	MAP2K1 (MEK1)	1000	-1		FES (FPS)	1000	-1
	MAP2K2 (MEK2)	1000	0		FGFR1	1000	-14
	MAP2K3 (MEK3)	1000	-2		FGFR2	1000	-1
	MAP2K6 (MKK6) S207E T211E	1000	-1		FGFR3 K650E	1000	-2
	MAP2K6 (MKK6)	1000	-4		FGFR3	1000	12
	MAP3K10 (MLK2)	1000	1		FGFR4	1000	-4
	MAP3K11 (MLK3)	1000	3		FGR	1000	33
	MAP3K14 (NIK)	1000	-3		FLT1 (VEGFR1)	1000	-1
	MAP3K2 (MEKK2)	1000	-1		FLT3 D835Y	1000	68
	MAP3K3 (MEKK3)	1000	-4		FLT3	1000	84
	MAP3K5 (ASK1)	1000	0		FLT4 (VEGFR3)	1000	-1
	MAP3K7/MAP3K7IP1 (TAK1-TAB1)	1000	2		FRAP1 (mTOR)	1000	-10
	MAP4K1 (HPK1)	1000	1		FRK (PTK5)	1000	20
	MAP4K3 (GLK)	1000	1		FYN	1000	14
	MAPK10 (JNK3)	1000	-1		GRK4	1000	-5
	MAPK15 (ERK7)	1000	-1		GRK5	1000	1
	MAPK8 (JNK1)	1000	-5		GRK6	1000	0
	MAPK9 (JNK2)	1000	-5		GRK7	1000	-5
	MERTK (cMER) A708S	1000	1		GSK3A (GSK3 alpha)	1000	3
	MET D1228H	1000	-6		GSK3B (GSK3 beta)	1000	6
	MKNK2 (MNK2)	1000	0		HCK	1000	4
	MLCK (MLCK2)	1000	39		HIPK1 (Myak)	1000	3
	MYLK (MLCK)	1000	-3		HIPK2	1000	12
	MYO3B (MYO3 beta)	1000	0		HIPK3 (YAK1)	1000	4
	NLK	1000	-1		HIPK4	1000	11
	NUAK2	1000	-2		IGF1R	1000	2
	PKN2 (PRK2)	1000	-1		IKBKB (IKK beta)	1000	-2
	PLK4	1000	-3		IKBKE (IKK epsilon)	1000	0
	PRKACB (PRKAC beta)	1000	-3		INSR	1000	-2
	PRKACG (PRKAC gamma)	1000	-9		INSRR (IRR)	1000	1
	RAF1 (cRAF) Y340D Y341D	1000	-1		IRAK4	1000	-5
	RET G691S	1000	3		ITK	1000	-3
	RET M918T	1000	12		JAK1	1000	-4
	RET V804M	1000	6		JAK2 JH1 JH2 V617F	1000	1
	RIPK2	1000	44		JAK2 JH1 JH2	1000	-4
	RIPK3	1000	1		JAK2	1000	-1
	SIK1	1000	13		JAK3	1000	-1
	SIK3	1000	9		KDR (VEGFR2)	1000	5
	SLK	1000	0		KIT T670I	1000	14
	STK16 (PKL12)	1000	5		KIT	1000	30
	STK17A (DRAK1)	1000	23		LCK	1000	38
	STK17B (DRAK2)	1000	-16		LTK (TYK1)	1000	-6
	STK32B (YANK2)	1000	-2		LYN A	1000	11
	STK32C (YANK3)	1000	-10		LYN B	1000	7
	STK33	1000	8		MAP2K1 (MEK1)	1000	-2
	STK38 (NDR)	1000	2		MAP2K2 (MEK2)	1000	3
	STK38L (NDR2)	1000	-1		MAP2K6 (MKK6)	1000	0
	STK39 (STLK3)	1000	-6		MAP3K8 (COT)	1000	4
	TAOK1	1000	18		MAP3K9 (MLK1)	1000	-4
	TAOK3 (JIK)	1000	-4		MAP4K2 (GCK)	1000	39
	TEC	1000	-2		MAP4K4 (HGK)	1000	17
	TEK (TIE2) R849W	1000	-7		MAP4K5 (KHS1)	1000	-3
	TEK (TIE2) Y1108F	1000	-8		MAPK1 (ERK2)	1000	-5
	TESK2	1000	-1		MAPK10 (JNK3)	1000	6
	TGFBR1 (ALK5)	1000	-7		MAPK11 (p38 beta)	1000	4
	TGFBR2	1000	14		MAPK12 (p38 gamma)	1000	2
	TLK1	1000	-2		MAPK13 (p38 delta)	1000	5
	TLK2	1000	-12		MAPK14 (p38 alpha) Direct	1000	0
	TNIK	1000	15		MAPK14 (p38 alpha)	1000	2
	TNK2 (ACK)	1000	0		MAPK3 (ERK1)	1000	2
	TTK	1000	12		MAPK8 (JNK1)	1000	-1
	ULK1	1000	-5		MAPK9 (JNK2)	1000	-2
	ULK2	1000	-16		MAPKAPK2	1000	0
	ULK3	1000	-1		MAPKAPK3	1000	-4
	WEE1	1000	-8		MAPKAPK5 (PRAK)	1000	-1
	WNK2	1000	-2		MARK1 (MARK)	1000	-3
	WNK3	1000	1		MARK2	1000	6
	ZAK	1000	0		MARK3	1000	1
					MARK4	1000	1
					MATK (HYL)	1000	-3
					MELK	1000	33
					MERTK (cMER)	1000	2
					MET (cMet)	1000	0
					MET M1250T	1000	-3
					MINK1	1000	12
					MKNK1 (MNK1)	1000	2
					MST1R (RON)	1000	-3
					MST4	1000	1
					MUSK	1000	8
					MYLK2 (skMLCK)	1000	5
					NEK1	1000	-1
					NEK2	1000	-2
					NEK4	1000	8
					NEK6	1000	-6
					NEK7	1000	0
					NEK9	1000	-3
					NTRK1 (TRKA)	1000	8
					NTRK2 (TRKB)	1000	11
					NTRK3 (TRKC)	1000	9
					PAK1	1000	4
					PAK2 (PAK65)	1000	0
					PAK3	1000	3
					PAK4	1000	0
					PAK6	1000	-14
					PAK7	1000	2
					PASK	1000	2
					PDGFRA (PDGFR alpha)	1000	17
					PDGFRA D842V	1000	-4
					PDGFRA T674I	1000	-5
					PDGFRA V561D	1000	34
					PDGFRB (PDGFR beta)	1000	28
					PDK1 Direct	1000	1
					PDK1	1000	6
					PHKG1	1000	5
					PHKG2	1000	2
					PIM1	1000	12
					PIM2	1000	2
					PKN1 (PRK1)	1000	0
					PLK1	1000	3
					PLK2	1000	-2
					PLK3	1000	-26
					PRKACA (PKA)	1000	-3
					PRKCA (PKC alpha)	1000	0
					PRKCB1 (PKC beta I)	1000	2
					PRKCB2 (PKC beta II)	1000	0
					PRKCD (PKC delta)	1000	-3
					PRKCE (PKC epsilon)	1000	2
					PRKCG (PKC gamma)	1000	-8
					PRKCH (PKC eta)	1000	3
					PRKCI (PKC iota)	1000	2
					PRKCN (PKD3)	1000	6
					PRKCQ (PKC theta)	1000	-10
					PRKCZ (PKC zeta)	1000	-1
					PRKD1 (PKC mu)	1000	7
					PRKD2 (PKD2)	1000	1
					PRKG1	1000	-6
					PRKG2 (PKG2)	1000	6
					PRKX	1000	11
					PTK2 (FAK)	1000	2
					PTK2B (FAK2)	1000	6
					PTK6 (Brk)	1000	-2
					RAF1 (cRAF) Y340D Y341D	1000	2
					RET V804L	1000	3
					RET Y791F	1000	9
					RET	1000	10
					ROCK1	1000	-4
					ROCK2	1000	-17
					ROS1	1000	0
					RPS6KA1 (RSK1)	1000	7
					RPS6KA2 (RSK3)	1000	6
					RPS6KA3 (RSK2)	1000	-2
					RPS6KA4 (MSK2)	1000	-1
					RPS6KA5 (MSK1)	1000	6
					RPS6KA6 (RSK4)	1000	1
					RPS6KB1 (p70S6K)	1000	-4
					SGK (SGK1)	1000	-5
					SGK2	1000	-7
					SGKL (SGK3)	1000	4
					SNF1LK2	1000	63
					SRC N1	1000	25
					SRC	1000	19
					SRMS (Srm)	1000	0
					SRPK1	1000	3
					SRPK2	1000	0
					STK22B (TSSK2)	1000	-3
					STK22D (TSSK1)	1000	2
					STK23 (MSSK1)	1000	2
					STK24 (MST3)	1000	-3
					STK25 (YSK1)	1000	0
					STK3 (MST2)	1000	-1
					STK4 (MST1)	1000	-1
					SYK	1000	1
					TAOK2 (TAO1)	1000	-6
					TBK1	1000	2
					TEK (Tie2)	1000	1
					TXK	1000	10
					TYK2	1000	0
					TYRO3 (RSE)	1000	6
					YES1	1000	27
					ZAP70	1000	0

## Sheet: BioMAP Readouts 
Systems & Translational Biomarker Readouts using the BioMAP® Diversity PLUS® Panel for Broad Phenotypic Profiling (for more details see https://www.eurofinsdiscoveryservices.com/services/phenotypic-assays/biomap/diversity-plus)
Key in fig1	System	Human Primary Cell Types	Diseases/Tissues Modeled	Description	Protein Biomarker Readouts
BioMAP1	3C (Th1 Vasculature)	Venular endothelial cells	Cardiovascular Disease, Chronic Inflammation	The Th1 Vasculature (3C) system models vascular inflammation of the Th1 type, an environment that promotes monocyte and T cell adhesion and recruitment and is anti-angiogenic. This system is relevant for chronic inflammatory diseases, vascular inflammation and restenosis.	MCP-1, VCAM-1, TM, TF, ICAM-1, E-selectin, uPAR, IL-8, MIG, HLADR, Proliferation, SRB
BioMAP2	4H (Th2 Vasculature)	Venular endothelial cells	Asthma, Allergy, Autoimmune Disease, Atopic Disease	The Th2 Vasculature (4H) system models vascular inflammation of the Th2 type, an environment that promotes mast cell, basophil, eosinophil, T and B cell recruitment and is proangiogenic. This system is relevant for diseases where Th2-type inflammatory conditions play a role such as allergy, asthma, and ulcerative colitis.	MCP-1, Eotaxin-3, VCAM-1, P-selectin, uPAR, SRB, VEGFR2
BioMAP3	LPS (Monocyte Activation)	PBMC/Venular endothelial cells	Cardiovascular Disease, Chronic Inflammation	The Monocyte Activation (LPS) system models chronic monocyte activation and vascular inflammation. This system is relevant to inflammatory conditions where monocytes play a key role including atherosclerosis, restenosis, rheumatoid arthritis, other chronic inflammatory conditions and metabolic diseases.	MCP-1, VCAM-1, TM, TF, CD40, E-selectin, CD69, IL-8, IL-1α, M-CSF, sPGE2, SRB, sTNFα
BioMAP4	Sag (T Cell Activation)	PBMC/Venular endothelial cells	Autoimmune Disease, Chronic Inflammation	The T Cell Activation (SAg) system models vascular inflammation and T cell activation. This system is relevant to inflammatory conditions where T cells play a key role including organ transplantation, rheumatoid arthritis, psoriasis, Crohn's disease and multiple sclerosis.	MCP-1, CD38, CD40, E-selectin, CD69, IL-8, MIG, PBMC Cytotoxicity, Proliferation, SRB
BioMAP5	BT (B and T Cell Autoimmunity)	B cells/PBMC	Autoimmune Disease, Inflammation	The B and T Cell Autoimmunity (BT) system models T cell dependent B cell activation and class switching as would occur in a germinal center. This system is relevant for diseases and conditions where B cell activation and antibody production are relevant. These include autoimmune disease, oncology, asthma and allergy.	B cell Proliferation, PBMC Cytotoxicity, Secreted IgG, sIL-17A, sIL-17F, sIL-2, sIL-6, sTNFα
BioMAP6	BF4T (Lung Disease)	Bronchial epithelial cells/Dermal fibroblasts	Asthma, Allergy, Lung Inflammation, Atopic Disease	The Lung Disease (BF4T) system models lung inflammation of the Th2 type, an environment that promotes the recruitment of eosinophils, mast cells and basophils as well as effector memory T cells. This system is relevant for allergy and asthma, pulmonary fibrosis, as well as COPD exacerbations.	MCP-1, Eotaxin-3, VCAM-1, ICAM-1, CD90, IL-8, IL-1α, Keratin 8/18, MMP-1, MMP-3, MMP-9, PAI-1, SRB, tPA, uPA
BioMAP7	BE3C (Lung Inflammation)	Bronchial epithelial cells	Lung Inflammation, COPD	The Lung Inflammation (BE3C) system models lung inflammation of the Th1 type, an environment that promotes monocyte and T cell adhesion and recruitment. This system is relevant for sarcoidosis and pulmonary responses to respiratory infections.	ICAM-1, uPAR, IP-10, I-TAC, IL-8, MIG, EGFR, HLA-DR, IL-1α, Keratin 8/18, MMP-1, MMP-9, PAI-1, SRB, tPA, uPA
BioMAP8	CASM3C (Cardiovascular Disease)	Coronary artery smooth muscle cells	Cardiovascular Inflammation, Restenosis	The Cardiovascular Disease (CASM3C) system models vascular inflammation of the Th1 type, an environment that promotes monocyte and T cell recruitment. This system is relevant for chronic inflammatory diseases, vascular inflammation and restenosis.	MCP-1, VCAM-1, TM, TF, uPAR, IL-8, MIG, HLA-DR, IL-6, LDLR, M-CSF, PAI-1, Proliferation, SAA, SRB
BioMAP9	HDF3CGF (Wound Healing and Inflammation)	Dermal fibroblasts	Fibrosis, Chronic Inflammation, Wound Healing, Tissue Remodeling, Matrix Modulation	The Wound Healing, Fibrosis and Inflammation (HDF3CGF) system models wound healing and matrix/tissue remodeling in the context of Th1-type inflammation. This system is relevant for various diseases including fibrosis, rheumatoid arthritis, psoriasis, as well as stromal biology in tumors.	MCP-1, VCAM-1, ICAM-1, Collagen I, Collagen III, IP-10, I-TAC, IL-8, MIG, EGFR, M-CSF, MMP-1, PAI-1, Proliferation, SRB, TIMP-1, TIMP-2
BioMAP10	KF3CT (Psoriasis and Dermatitis)	Keratinocytes/ Dermal fibroblasts	Psoriasis, Dermatitis, Skin Biology	The Psoriasis and Dermatitis (KF3CT) system models cutaneous inflammation of the Th1 type, an environment that promotes monocyte and T cell adhesion and recruitment. This system is relevant for cutaneous responses to tissue damage caused by mechanical, chemical, or infectious agents, as well as certain states of psoriasis and dermatitis.	MCP-1, ICAM-1, IP-10, IL-8, MIG, IL-1α, MMP-9, PAI-1, SRB, TIMP-2, uPA
BioMAP11	MyoF (Fibrosis)	Lung fibroblasts	Fibrosis, Chronic Inflammation, Matrix Remodeling	The Fibrosis (MyoF) system models the development of pulmonary myofibroblasts, and is relevant to respiratory disease settings as well as other chronic inflammatory settings where fibrosis occurs, such as rheumatoid arthritis.	a-SM Actin, bFGF, VCAM-1, Collagen I, Collagen III, Collagen IV, IL-8, Decorin, MMP-1, PAI-1, TIMP-1, SRB
BioMAP12	lMphg (Macrophage Activation)	Venular endothelial cells/ Macrophages	Cardiovascular Inflammation, Restenosis, Chronic Inflammation	The Macrophage Activation (/Mphg) system models chronic inflammation of the Th1 type and macrophage activation responses. This system is relevant to inflammatory conditions where monocytes play a key role including atherosclerosis, restenosis, rheumatoid arthritis, and other chronic inflammatory conditions.	MCP-1, MIP-1α, VCAM-1, CD40, E-selectin, CD69, IL-8, IL-1α, M-CSF, sIL-10, SRB, SRB-Mphg

## Sheet: BioMAP data by CT-179  conctrn
Hits table with the number of biomarker activities that are outside of the 95% significance envelope of vehicle controls (value of 1 indicates significant (95% confidence) effects on readout after CT-179 treatment
BioMAP cell system key	BioMAP Viewer Screening Profile: CTA001-01-b	CT-179 at 10 uM	CT-179 at 2.5 uM	CT-179 at 0.62 uM	CT-179 at 0.16 uM
BioMAP1	3C:CCL2/MCP-1	1	0	1	0
BioMAP1	3C:CD106/VCAM-1	1	1	0	0
BioMAP1	3C:CD141/Thrombomodulin	1	0	0	1
BioMAP1	3C:CD142/Tissue Factor	1	0	0	1
BioMAP1	3C:CD54/ICAM-1	1	0	0	0
BioMAP1	3C:CD62E/E-Selectin	1	0	0	0
BioMAP1	3C:CD87/uPAR	1	1	0	0
BioMAP1	3C:CXCL8/IL-8	0	0	0	0
BioMAP1	3C:CXCL9/MIG	0	0	0	0
BioMAP1	3C:HLA-DR	1	1	0	0
BioMAP1	3C:Proliferation	1	1	1	1
BioMAP1	3C:SRB	1	1	1	0
BioMAP2	4H:CCL2/MCP-1	1	0	0	0
BioMAP2	4H:CCL26/Eotaxin-3	1	1	0	0
BioMAP2	4H:CD106/VCAM-1	1	1	0	0
BioMAP2	4H:CD62P/P-selectin	1	1	0	0
BioMAP2	4H:CD87/uPAR	1	1	0	0
BioMAP2	4H:SRB	1	1	0	0
BioMAP2	4H:VEGFR2	0	0	0	0
BioMAP3	LPS:CCL2/MCP-1	1	1	0	0
BioMAP3	LPS:CD106/VCAM-1	1	1	0	0
BioMAP3	LPS:CD141/Thrombomodulin	0	0	0	0
BioMAP3	LPS:CD142/Tissue Factor	1	1	0	0
BioMAP3	LPS:CD40	1	1	0	0
BioMAP3	LPS:CD62E/E-Selectin	0	0	0	0
BioMAP3	LPS:CD69	1	1	0	0
BioMAP3	LPS:CXCL8/IL-8	0	0	0	0
BioMAP3	LPS:IL-1alpha	1	1	0	0
BioMAP3	LPS:M-CSF	1	1	0	0
BioMAP3	LPS:sPGE2	1	0	0	1
BioMAP3	LPS:SRB	1	1	0	0
BioMAP3	LPS:sTNF-alpha	1	1	1	0
BioMAP3	SAg:CCL2/MCP-1	1	1	1	0
BioMAP4	SAg:CD38	1	1	1	0
BioMAP4	SAg:CD40	1	1	1	0
BioMAP4	SAg:CD62E/E-Selectin	0	0	0	0
BioMAP4	SAg:CD69	1	1	0	0
BioMAP4	SAg:CXCL8/IL-8	0	0	0	0
BioMAP4	SAg:CXCL9/MIG	0	0	0	0
BioMAP4	SAg:PBMC Cytotoxicity	1	0	0	0
BioMAP4	SAg:Proliferation	1	1	1	0
BioMAP4	SAg:SRB	1	1	0	0
BioMAP5	BT:B cell Proliferation	1	1	1	0
BioMAP5	BT:PBMC Cytotoxicity	1	1	0	0
BioMAP5	BT:Secreted IgG	1	1	1	0
BioMAP5	BT:sIL-17A	1	1	1	0
BioMAP5	BT:sIL-17F	1	1	1	0
BioMAP5	BT:sIL-2	1	1	1	0
BioMAP5	BT:sIL-6	1	1	0	0
BioMAP5	BT:sTNF-alpha	1	1	0	0
BioMAP6	BF4T:CCL2/MCP-1	0	0	0	0
BioMAP6	BF4T:CCL26/Eotaxin-3	1	0	0	0
BioMAP6	BF4T:CD106/VCAM-1	0	0	0	1
BioMAP6	BF4T:CD54/ICAM-1	0	0	0	0
BioMAP6	BF4T:CD90	0	0	0	0
BioMAP6	BF4T:CXCL8/IL-8	1	0	0	0
BioMAP6	BF4T:IL-1alpha	0	0	0	0
BioMAP6	BF4T:Keratin 8/18	0	0	0	0
BioMAP6	BF4T:MMP-1	0	0	0	0
BioMAP6	BF4T:MMP-3	0	0	0	0
BioMAP6	BF4T:MMP-9	1	0	0	0
BioMAP6	BF4T:PAI-I	0	0	0	0
BioMAP6	BF4T:SRB	0	0	0	0
BioMAP6	BF4T:tPA	0	0	0	0
BioMAP6	BF4T:uPA	0	0	0	0
BioMAP7	BE3C:CD54/ICAM-1	0	0	0	0
BioMAP7	BE3C:CD87/uPAR	0	0	0	0
BioMAP7	BE3C:CXCL10/IP-10	1	0	0	0
BioMAP7	BE3C:CXCL11/I-TAC	1	0	0	0
BioMAP7	BE3C:CXCL8/IL-8	0	0	0	0
BioMAP7	BE3C:CXCL9/MIG	0	0	0	0
BioMAP7	BE3C:EGFR	1	0	0	0
BioMAP7	BE3C:HLA-DR	1	0	0	0
BioMAP7	BE3C:IL-1alpha	1	0	0	0
BioMAP7	BE3C:Keratin 8/18	0	0	0	0
BioMAP7	BE3C:MMP-1	0	1	0	0
BioMAP7	BE3C:MMP-9	1	1	0	0
BioMAP7	BE3C:PAI-I	1	0	0	0
BioMAP7	BE3C:SRB	0	0	0	0
BioMAP7	BE3C:tPA	1	1	0	0
BioMAP7	BE3C:uPA	0	0	0	0
BioMAP8	CASM3C:CCL2/MCP-1	1	1	0	0
BioMAP8	CASM3C:CD106/VCAM-1	0	0	0	0
BioMAP8	CASM3C:CD141/Thrombomodulin	1	0	0	1
BioMAP8	CASM3C:CD142/Tissue Factor	1	0	1	1
BioMAP8	CASM3C:CD87/uPAR	1	0	0	0
BioMAP8	CASM3C:CXCL8/IL-8	0	0	0	0
BioMAP8	CASM3C:CXCL9/MIG	0	0	0	0
BioMAP8	CASM3C:HLA-DR	1	0	0	0
BioMAP8	CASM3C:IL-6	0	0	0	0
BioMAP8	CASM3C:LDLR	0	0	0	0
BioMAP8	CASM3C:M-CSF	1	1	0	0
BioMAP8	CASM3C:PAI-I	0	0	0	0
BioMAP8	CASM3C:Proliferation	1	1	1	0
BioMAP8	CASM3C:Serum Amyloid A	1	1	0	0
BioMAP8	CASM3C:SRB	0	0	0	0
BioMAP9	HDF3CGF:CCL2/MCP-1	0	0	0	0
BioMAP9	HDF3CGF:CD106/VCAM-1	1	1	0	0
BioMAP9	HDF3CGF:CD54/ICAM-1	0	0	0	0
BioMAP9	HDF3CGF:Collagen I	0	0	0	0
BioMAP9	HDF3CGF:Collagen III	1	0	0	0
BioMAP9	HDF3CGF:CXCL10/IP-10	1	0	0	0
BioMAP9	HDF3CGF:CXCL11/I-TAC	1	0	0	0
BioMAP9	HDF3CGF:CXCL8/IL-8	0	0	0	0
BioMAP9	HDF3CGF:CXCL9/MIG	0	0	0	0
BioMAP9	HDF3CGF:EGFR	1	1	0	1
BioMAP9	HDF3CGF:M-CSF	0	0	0	0
BioMAP9	HDF3CGF:MMP-1	0	0	0	0
BioMAP9	HDF3CGF:PAI-I	1	0	0	0
BioMAP9	HDF3CGF:Proliferation_72hr	1	1	1	0
BioMAP9	HDF3CGF:SRB	1	0	0	0
BioMAP9	HDF3CGF:TIMP-1	0	0	0	0
BioMAP9	HDF3CGF:TIMP-2	1	1	0	0
BioMAP10	KF3CT:CCL2/MCP-1	0	0	0	0
BioMAP10	KF3CT:CD54/ICAM-1	0	0	0	0
BioMAP10	KF3CT:CXCL10/IP-10	1	0	0	0
BioMAP10	KF3CT:CXCL8/IL-8	1	0	0	0
BioMAP10	KF3CT:CXCL9/MIG	0	0	0	0
BioMAP10	KF3CT:IL-1alpha	1	1	0	0
BioMAP10	KF3CT:MMP-9	1	0	0	0
BioMAP10	KF3CT:PAI-I	0	0	0	0
BioMAP10	KF3CT:SRB	0	0	0	0
BioMAP10	KF3CT:TIMP-2	0	0	0	0
BioMAP10	KF3CT:uPA	0	0	0	0
BioMAP11	MyoF:alpha-SM Actin	1	1	1	0
BioMAP11	MyoF:bFGF	1	0	0	0
BioMAP11	MyoF:CD106/VCAM-1	1	1	1	0
BioMAP11	MyoF:Collagen I	1	1	0	0
BioMAP11	MyoF:Collagen III	1	1	0	0
BioMAP11	MyoF:Collagen IV	1	1	1	0
BioMAP11	MyoF:CXCL8/IL-8	0	1	0	1
BioMAP11	MyoF:Decorin	0	1	0	0
BioMAP11	MyoF:MMP-1	1	1	1	1
BioMAP11	MyoF:PAI-I	1	1	1	0
BioMAP11	MyoF:SRB	1	1	1	0
BioMAP11	MyoF:TIMP-1	1	0	0	0
BioMAP12	lMphg:CCL2/MCP-1	1	0	0	0
BioMAP12	lMphg:CCL3/MIP-1alpha	0	0	0	0
BioMAP12	lMphg:CD106/VCAM-1	1	1	0	0
BioMAP12	lMphg:CD40	1	1	0	0
BioMAP12	lMphg:CD62E/E-Selectin	1	0	0	0
BioMAP12	lMphg:CD69	1	1	1	0
BioMAP12	lMphg:CXCL8/IL-8	1	0	0	0
BioMAP12	lMphg:IL-1alpha	1	0	0	0
BioMAP12	lMphg:M-CSF	1	0	0	0
BioMAP12	lMphg:sIL-10	1	1	1	1
BioMAP12	lMphg:SRB	1	0	0	0
BioMAP12	lMphg:SRB-Mphg	0	0	0	0
	Total Annotation Hits	93	59	24	11

## Sheet: PK
Estimated pharmacokinetic parameters for CT-179 at 20 mg/kg Dose (PO)
Animal	number of points for t1/2	t1/2 (h)	tmax (h)	cmax (ng/mL)	AUClast (h*ng/mL)	AUCinf (h*ng/mL)	AUC extr (%)	MRT	AUC/D (h*kg*ng/Ml/mg	F (%)	Rsq
1	3	13.8	1	160	2741	3932	30.3	20.5	197	58.4	0.967
2	3	8.83	1	253	3643	4275	14.8	13.5	214	77.7	0.915
3	3	9.62	8	281	4288	5262	18.5	15.2	263	91.4	0.948
mean		10.7	3.33	231	3557	4490	21.2	16.4	224	75.8
SD		2.7	4.04	63	777	690	8.1	3.6	34.5	16.6
CV(%)		24.9	121	27.4	21.8	15.4	38.2	22.3	15.4	21.8
	Summary data for plasma and brain exposure at 1 mg/kg dose (PO)
	animal	time point (h)	CT-179 plasma concentration (ng/mL)		CT-179 brain concentration(ng/g)		brain/plasma ratio
				average		average		average
	1	24h after day1 (single treatment)	6.52	9.11	67	95.3	10.3	10.4
	2		11		119		10.8
	3		9.8		101		10.3
	4	24h after day3 ( three treatments)	7.52	10.2	113	105	15	11.1
	5		9.44		104		11
	6		13.7		98.5		7.19
	Summary data for plasma and brain exposure at 5 mg/kg dose (PO)
	animal	time point (h)	CT-179 plasma concentration (ng/mL)		CT-179 brain concentration(ng/g)		brain/plasma ratio
				average		average		average
	1	24h after day1 (single treatment)	30.7	36.8	426	425	13.9	11.8
	2		45.9		444		9.67
	3		33.9		404		11.9
	4	24h after day3 ( three treatments)	60.8	49.8	605	588	10	12
	5		43.4		500		11.5
	6		45.3		660		14.6
	7	48h after day3 ( three treatments)	11.4	9.72	127	144	11.1	15.3
	8		7.55		149		19.7
	9		10.2		155		15.1

## Sheet: Regimens
Regminens for CT-179 and RT in G-Smo mice
	Control	CT-179 (C)					Radiation (R)							Radiation + CT179 (C+R)
Day	n=16	#1 (n=6)		#2 (n=7)	#3 (n=11)		#1 (n=11)		#2 (n=7)		#3 (n=4)		Day	#1 (n=4)		#2 (n=4)	#3 (n=5)		#4 (n=8)	#5 (n=4)	#6 (n=10)
10	No treatment	80 mg/kg		100 mg/kg	80 mg/kg		X		X		2 Gy		10	C+R		C+R	C+R		C 80 mg/kg	C 80 mg/kg	C 80 mg/kg
11		X		X	X		X		X		2 Gy			80 mg/kg+2 Gy		80 mg/kg+1 Gy	80 mg/kg+1 Gy
12		X		X	80 mg/kg		X		X		2 Gy		11	R 2Gy		R 1Gy	X		X	R 1Gy	X
13		80 mg/kg		100 mg/kg	X		X		X		2 Gy		12	C+R		C+R	C+R		C 80 mg/kg	C 80 mg/kg	C 80 mg/kg
14		X		X	80 mg/kg		0.5 Gy		1 Gy		2 Gy			80 mg/kg+2 Gy		80 mg/kg+1 Gy	80 mg/kg+1 Gy
15		X		X	X		0.5 Gy		1 Gy		X		13	R 2Gy		R 1Gy	X		X	R 1Gy	X
16		80 mg/kg		100 mg/kg	80 mg/kg		0.5 Gy		1 Gy		X		14	C+R		C+R	C+R		C+R	C 80 mg/kg	C+R
17		X		X	X		X		1 Gy		X			80 mg/kg+2 Gy		80 mg/kg+1 Gy	80 mg/kg+1 Gy		80 mg/kg+1 Gy		80 mg/kg+0.5 Gy
18		X		X	80 mg/kg		X		X		X		15	X		X	X		R 1Gy	R 1Gy	R 0.5Gy
19		80 mg/kg		100 mg/kg	X		X		X		X		16	C 80 mg/kg		C 80 mg/kg	C+R		C+R	C 80 mg/kg	C+R
20		X		X	80 mg/kg		X		X		X						80 mg/kg+1 Gy		80 mg/kg+1 Gy		80 mg/kg+0.5 Gy
21		X		X	X		X		X		X		17	X		X	X		R 1Gy	R 1Gy	X
~35						*							18	C 80 mg/kg		C 80 mg/kg	C+R		C 80 mg/kg	C 80 mg/kg	C 80 mg/kg
						*											80 mg/kg+1 Gy
						*							19	X		X	X		X	R 1Gy	X
Median survival	15.5	19.5		20.5	21		19		16		16		20	C 80 mg/kg		C 80 mg/kg	C 80 mg/kg		C 80 mg/kg	C 80 mg/kg	C 80 mg/kg
													21	X		X	X		X	X	X
													~35					*
																		*
																		*
													Median survival	15		19	18		19	15	25.5
