# Supplementary material for: Preventing recurrence in Sonic Hedgehog Subgroup Medulloblastoma using OLIG2 inhibitor CT-179
Source: Research Square preprint supplement (doi:10.21203/rs.3.rs-2949436/v1), 2023-06-09
Supplement: Supplementary file 2 [file 7b535fccce5fdbf3899866d3.xlsx]

## Sheet: cluster 0
gene	p_val	avg_log2FC	fraction + in cluster	fraction + not in cluster	p_val_adj	ratio + in:out of cluster
Hist1h1a	6.10888e-27	0.469409	0.115	0.03	1.08237e-22	3.83332
Tk1	7.99444e-27	0.474591	0.14	0.044	1.41645e-22	3.18181
Ccne2	6.14182e-37	0.643473	0.186	0.059	1.08821e-32	3.15254
Esco2	6.00545e-63	0.889404	0.306	0.098	1.06405e-58	3.12245
Mybl2	1.28921e-24	0.475877	0.142	0.047	2.28422e-20	3.02127
Hist1h1d	4.95707e-15	0.490367	0.138	0.046	8.78294e-11	2.99999
Neil3	5.69126e-123	1.24178	0.507	0.171	1.00838e-118	2.96491
Hist1h1b	1.56707e-56	0.96996	0.306	0.105	2.77653e-52	2.91428
Brip1	1.30724e-81	1.02129	0.391	0.135	2.31618e-77	2.89629
Tyms	8.62207e-43	0.636108	0.217	0.076	1.52766e-38	2.85526
Clspn	1.83589e-89	1.03801	0.408	0.147	3.25283e-85	2.77551
Rrm2	3.42596e-26	0.486468	0.152	0.055	6.07012e-22	2.76363
Pclaf	6.7414e-58	0.926436	0.332	0.121	1.19444e-53	2.7438
E2f8	3.24143e-35	0.610726	0.197	0.073	5.74317e-31	2.69863
Zfp367	2.56799e-47	0.743562	0.266	0.099	4.54997e-43	2.68687
Cenph	6.87582e-25	0.478429	0.153	0.057	1.21826e-20	2.68421
Gpc3	4.8827e-43	0.788186	0.241	0.09	8.65116e-39	2.67777
E2f7	8.33291e-81	1.02907	0.416	0.156	1.47643e-76	2.66666
Cchcr1	2.86106e-18	0.375821	0.122	0.046	5.06922e-14	2.65217
E2f2	2.08775e-20	0.508632	0.167	0.063	3.69907e-16	2.65079
Fam111a	2.91283e-18	0.351461	0.108	0.041	5.16095e-14	2.63414
Brca1	2.85852e-84	1.06409	0.442	0.168	5.06472e-80	2.63095
Slfn9	4.93325e-22	0.456173	0.139	0.053	8.74073e-18	2.62264
Cdc6	2.48147e-20	0.414247	0.125	0.048	4.39667e-16	2.60416
Cdc45	2.08594e-26	0.555689	0.203	0.078	3.69586e-22	2.60256
Kntc1	2.56583e-80	1.01407	0.427	0.165	4.54615e-76	2.58788
Rad51ap1	1.93972e-34	0.663054	0.246	0.096	3.4368e-30	2.5625
Hist1h1c	3.47475e-15	0.363333	0.105	0.041	6.15656e-11	2.56097
Atad2	4.62501e-157	1.34797	0.65	0.255	8.1946e-153	2.54902
Fancd2	8.00012e-46	0.67673	0.242	0.095	1.41746e-41	2.54737
Exo1	8.32584e-29	0.628399	0.229	0.09	1.47517e-24	2.54444
Fanci	3.98512e-21	0.569101	0.197	0.078	7.06083e-17	2.52564
Hs6st2	2.74327e-39	0.822933	0.275	0.109	4.86052e-35	2.52293
Kif15	5.43095e-153	1.26209	0.682	0.272	9.62255e-149	2.50735
Atp10a	3.5851e-34	0.658327	0.232	0.093	6.35208e-30	2.49462
Ncapg2	2.03236e-75	1.01036	0.441	0.177	3.60093e-71	2.49152
Fanca	8.06865e-36	0.672675	0.261	0.105	1.4296e-31	2.48571
Bard1	2.04221e-48	0.787573	0.308	0.124	3.61839e-44	2.48387
Mcm10	2.1691e-30	0.61459	0.222	0.09	3.84321e-26	2.46666
Grik1	1.07867e-36	0.89738	0.261	0.106	1.91119e-32	2.46226
Pbk	6.63724e-18	0.422493	0.142	0.058	1.17599e-13	2.44827
Rad51	1.07387e-26	0.552806	0.2	0.083	1.90268e-22	2.40964
Rad54l	8.26738e-24	0.489009	0.173	0.072	1.46481e-19	2.40277
Myb	1.2566e-21	0.509545	0.185	0.077	2.22645e-17	2.40259
Diaph3	1.18615e-220	1.44952	0.844	0.352	2.10162e-216	2.39773
Dna2	1.02745e-21	0.497675	0.177	0.074	1.82043e-17	2.39189
Cacnb2	1.6036e-54	0.925618	0.353	0.148	2.84125e-50	2.38513
Mbnl3	8.67929e-23	0.465389	0.155	0.065	1.5378e-18	2.38461
Melk	2.25307e-32	0.638441	0.245	0.103	3.99199e-28	2.37864
Pole	1.5383e-59	0.879174	0.392	0.165	2.72556e-55	2.37576
Plekha7	6.09589e-26	0.605877	0.209	0.088	1.08007e-21	2.375
Pcna	6.66306e-41	0.605614	0.235	0.099	1.18056e-36	2.37373
Cenpu	4.8997e-13	0.415339	0.142	0.06	8.68129e-09	2.36666
Top2a	2.26244e-167	1.19401	0.797	0.337	4.00859e-163	2.36498
Gli3	9.681e-49	0.899061	0.34	0.145	1.71528e-44	2.34483
Gm12610	3.43481e-18	0.450887	0.138	0.059	6.0858e-14	2.33898
Cenpp	1.32059e-162	1.30371	0.704	0.302	2.33982e-158	2.33113
Iqgap3	3.29857e-34	0.644642	0.249	0.107	5.8444e-30	2.3271
Nsl1	4.80052e-13	0.314403	0.107	0.046	8.50557e-09	2.32608
Zwilch	6.86543e-30	0.572287	0.218	0.094	1.21642e-25	2.31915
Hist1h1e	1.55809e-34	0.755531	0.284	0.123	2.76063e-30	2.30894
Rad54b	8.31074e-50	0.763137	0.326	0.142	1.4725e-45	2.29577
Polq	4.538e-74	0.909266	0.435	0.191	8.04044e-70	2.27749
Rrm1	1.09624e-50	0.788966	0.359	0.158	1.94232e-46	2.27215
Ticrr	2.25664e-30	0.62525	0.265	0.117	3.99831e-26	2.26496
Rmi2	6.48994e-24	0.556996	0.221	0.098	1.14989e-19	2.2551
Uhrf1	1.57061e-30	0.595727	0.239	0.106	2.78281e-26	2.25471
Kif11	6.45685e-103	0.959947	0.594	0.264	1.14402e-98	2.25
Greb1	1.50991e-13	0.351148	0.117	0.052	2.67526e-09	2.25
Pask	2.92839e-12	0.444133	0.166	0.074	5.18852e-08	2.24324
Cenpk	8.29754e-30	0.589749	0.238	0.107	1.47016e-25	2.2243
Wdr76	1.21999e-30	0.614677	0.258	0.116	2.16158e-26	2.22414
Ntng1	1.5505e-21	0.555893	0.162	0.073	2.74717e-17	2.21918
Fbxo5	3.30081e-14	0.42831	0.153	0.069	5.84837e-10	2.21739
Stil	9.24048e-32	0.642307	0.27	0.122	1.63723e-27	2.21311
Lig1	2.5298e-57	0.864406	0.411	0.187	4.48229e-53	2.19786
Ndc80	2.01653e-34	0.62197	0.27	0.123	3.57288e-30	2.19512
Rad51b	2.62205e-164	1.39689	0.722	0.329	4.64574e-160	2.19453
Dut	2.75393e-15	0.3581	0.125	0.057	4.87941e-11	2.19298
Ncapg	2.83522e-43	0.717104	0.34	0.156	5.02344e-39	2.17949
Wdhd1	4.88842e-43	0.671858	0.305	0.14	8.66131e-39	2.17857
Tonsl	3.01251e-16	0.367788	0.132	0.061	5.33756e-12	2.16393
Shcbp1	7.56604e-25	0.520602	0.2	0.093	1.34055e-20	2.15054
Zgrf1	4.33596e-66	0.880036	0.449	0.209	7.68246e-62	2.14832
Vrk2	1.71117e-14	0.395225	0.146	0.068	3.03186e-10	2.14706
Slbp	2.86841e-20	0.446168	0.176	0.082	5.08225e-16	2.14634
Knl1	3.27941e-74	0.870297	0.58	0.271	5.81047e-70	2.14022
Bub1	7.52589e-36	0.683426	0.315	0.148	1.33344e-31	2.12838
Iqgap2	7.02744e-32	0.674426	0.3	0.141	1.24512e-27	2.12766
Cenpn	7.45012e-13	0.39398	0.144	0.068	1.32001e-08	2.11764
Dtl	2.33476e-68	0.870098	0.471	0.223	4.13673e-64	2.11211
Aurkb	2.16912e-18	0.450615	0.179	0.085	3.84325e-14	2.10588
Chaf1b	4.54957e-16	0.381202	0.141	0.067	8.06093e-12	2.10447
Pole2	5.09064e-15	0.33249	0.122	0.058	9.0196e-11	2.10344
Gen1	7.32544e-11	0.382679	0.145	0.069	1.29792e-06	2.10145
Cit	4.00802e-66	0.852863	0.512	0.244	7.10141e-62	2.09836
Plk4	1.17233e-22	0.609133	0.26	0.124	2.07713e-18	2.09677
Cdk2	7.36245e-08	0.298081	0.109	0.052	0.00130448	2.09615
Prim1	7.40742e-26	0.471286	0.2	0.096	1.31245e-21	2.08333
Foxm1	7.53339e-24	0.552669	0.229	0.11	1.33477e-19	2.08182
Spag5	1.22776e-32	0.583081	0.258	0.124	2.17535e-28	2.08064
Hells	8.75431e-59	0.790841	0.406	0.196	1.55109e-54	2.07143
Chaf1a	1.48952e-18	0.428253	0.178	0.086	2.63913e-14	2.06977
Mastl	4.84531e-26	0.538759	0.231	0.112	8.58492e-22	2.0625
Kif4	1.88955e-42	0.742545	0.422	0.205	3.3479e-38	2.05854
Cenpi	5.92899e-23	0.51823	0.22	0.107	1.0505e-18	2.05607
Haus5	6.67603e-08	0.327965	0.123	0.06	0.00118286	2.05
Zdhhc2	6.26621e-11	0.364563	0.131	0.064	1.11025e-06	2.04687
Kif24	1.9897e-38	0.703019	0.335	0.164	3.52535e-34	2.04268
Atad5	6.71383e-79	0.966342	0.541	0.265	1.18956e-74	2.04151
Cenpq	1.88638e-09	0.326921	0.116	0.057	3.34229e-05	2.03508
Rpa1	1.80624e-31	0.606316	0.273	0.135	3.2003e-27	2.02222
Incenp	1.34639e-50	0.719226	0.404	0.2	2.38553e-46	2.02
Nuf2	1.4448e-25	0.526417	0.226	0.112	2.55989e-21	2.01786
Spc25	2.31288e-18	0.379118	0.149	0.074	4.09795e-14	2.01351
Mybl1	2.13297e-16	0.423832	0.164	0.082	3.77919e-12	2
Ncaph	1.60835e-24	0.520458	0.233	0.117	2.84968e-20	1.99145
Ubr7	6.45091e-20	0.392609	0.167	0.084	1.14297e-15	1.98809
Rbl1	4.25049e-31	0.661785	0.323	0.163	7.53102e-27	1.98159
Spidr	3.42028e-36	0.690555	0.338	0.171	6.06005e-32	1.97661
Rad18	1.81548e-40	0.723331	0.38	0.193	3.21666e-36	1.96891
Prim2	6.36895e-84	0.918044	0.547	0.278	1.12845e-79	1.96763
Mns1	6.91177e-19	0.438685	0.179	0.091	1.22463e-14	1.96703
Dhfr	2.87302e-14	0.452504	0.192	0.098	5.09042e-10	1.95918
Cdca2	7.91475e-30	0.652392	0.382	0.195	1.40234e-25	1.95897
Mki67	6.38396e-161	1.02651	0.885	0.452	1.13111e-156	1.95796
Brca2	1.34282e-38	0.741099	0.395	0.205	2.37921e-34	1.92683
Zranb3	6.25366e-32	0.630616	0.31	0.161	1.10802e-27	1.92546
Zdhhc15	8.2807e-14	0.376119	0.154	0.08	1.46717e-09	1.925
Gucy1b1	3.35517e-15	0.268812	0.1	0.052	5.94468e-11	1.92307
Mms22l	2.28055e-61	0.850916	0.506	0.264	4.04068e-57	1.91667
Ankle1	7.467e-11	0.282258	0.111	0.058	1.323e-06	1.91379
Mcm3	1.38708e-15	0.386104	0.176	0.092	2.45764e-11	1.91304
Ttk	5.96849e-20	0.529886	0.265	0.139	1.0575e-15	1.90647
Tbc1d31	4.5035e-25	0.520728	0.241	0.127	7.97929e-21	1.89764
Wdr62	5.78178e-17	0.365298	0.148	0.078	1.02442e-12	1.89743
Pola2	9.37886e-26	0.502778	0.244	0.129	1.66175e-21	1.89147
Espl1	7.1413e-19	0.444543	0.201	0.107	1.26529e-14	1.8785
Tipin	1.22797e-10	0.287448	0.12	0.064	2.17572e-06	1.875
Skp2	1.96513e-18	0.47978	0.244	0.131	3.48183e-14	1.86259
Trip13	7.47676e-07	0.293348	0.121	0.065	0.0132473	1.86154
Gm16070	4.06529e-23	0.465207	0.182	0.098	7.20287e-19	1.85714
Timeless	6.26437e-21	0.458176	0.232	0.125	1.10992e-16	1.856
Bmpr1b	1.66938e-26	0.519861	0.241	0.13	2.95782e-22	1.85384
Birc5	4.48643e-08	0.28272	0.111	0.06	0.000794906	1.85
Topbp1	6.11046e-48	0.670153	0.412	0.223	1.08265e-43	1.84753
Cep128	7.54256e-85	0.949753	0.626	0.339	1.33639e-80	1.84661
Pold1	2.5655e-17	0.339101	0.155	0.084	4.54556e-13	1.84524
Ttf2	3.9055e-17	0.366065	0.155	0.084	6.91976e-13	1.84524
Blm	4.41775e-43	0.715423	0.416	0.226	7.82738e-39	1.84071
Chek1	3.48994e-12	0.299169	0.134	0.073	6.18347e-08	1.83561
Prex2	1.39563e-12	0.394184	0.167	0.091	2.47278e-08	1.83516
Adamts19	5.14986e-13	0.430358	0.176	0.096	9.12453e-09	1.83333
Cdk1	3.72471e-23	0.437543	0.216	0.118	6.59944e-19	1.83051
Csgalnact1	5.6053e-19	0.486415	0.203	0.111	9.93147e-15	1.82883
Orc1	7.77462e-09	0.260229	0.115	0.063	0.000137751	1.82539
Shmt1	3.50908e-07	0.259266	0.113	0.062	0.00621739	1.82258
Tenm3	2.86499e-60	0.925385	0.572	0.314	5.07619e-56	1.82166
Cdca8	6.86729e-10	0.345264	0.151	0.083	1.21675e-05	1.81927
Mtbp	1.36711e-38	0.600663	0.342	0.189	2.42225e-34	1.80952
Cep152	5.94707e-37	0.603479	0.34	0.188	1.0537e-32	1.80851
Cdc7	1.33151e-20	0.403177	0.202	0.112	2.35917e-16	1.80357
Ppfibp1	8.96962e-07	0.296761	0.128	0.071	0.0158924	1.80281
Tjp2	1.35801e-12	0.30519	0.137	0.076	2.40613e-08	1.80263
Chek2	4.32875e-09	0.32097	0.137	0.076	7.66968e-05	1.80263
Smc2	1.25287e-104	0.951192	0.728	0.405	2.21983e-100	1.79753
Hat1	2.8313e-24	0.442811	0.237	0.132	5.0165e-20	1.79545
Gpc6	1.63692e-273	1.53999	0.928	0.517	2.9003e-269	1.79497
Wdr90	1.93071e-09	0.292662	0.129	0.072	3.42084e-05	1.79166
Pold3	8.21325e-24	0.578111	0.335	0.187	1.45522e-19	1.79144
Efcab11	2.48558e-39	0.637594	0.385	0.215	4.40395e-35	1.7907
Tuba1b	1.72955e-14	0.311652	0.136	0.076	3.06441e-10	1.78947
Smc4	5.13351e-86	0.839215	0.679	0.38	9.09555e-82	1.78684
Rfwd3	2.32546e-17	0.476366	0.25	0.14	4.12026e-13	1.78571
Dnajc9	2.50417e-12	0.275842	0.125	0.07	4.43689e-08	1.78571
Ror2	2.85279e-49	0.721688	0.446	0.25	5.05457e-45	1.784
Dek	7.22505e-72	0.828402	0.564	0.317	1.28013e-67	1.77918
Jade1	2.03722e-09	0.288942	0.128	0.072	3.60955e-05	1.77778
Prkcq	1.36073e-13	0.448453	0.215	0.121	2.41094e-09	1.77686
Gli1	6.55292e-39	0.693311	0.433	0.244	1.16105e-34	1.77459
Pdzd2	2.59271e-09	0.309963	0.117	0.066	4.59376e-05	1.77272
Lockd	3.93414e-25	0.503179	0.29	0.164	6.97051e-21	1.76829
Mcm6	2.78148e-19	0.470587	0.272	0.154	4.92823e-15	1.76623
Anln	1.05375e-19	0.522405	0.337	0.191	1.86703e-15	1.7644
Lin54	1.54834e-15	0.440392	0.217	0.123	2.74336e-11	1.76423
Fat3	5.77721e-75	0.90662	0.621	0.352	1.02361e-70	1.7642
Slc7a5	1.23412e-15	0.383267	0.183	0.104	2.18661e-11	1.75961
Gins1	1.11711e-09	0.270872	0.123	0.07	1.97929e-05	1.75714
Mcm5	1.48851e-13	0.391833	0.216	0.123	2.63734e-09	1.7561
Fn1	1.27154e-13	0.286388	0.135	0.077	2.25291e-09	1.75324
Dnmt1	1.18999e-49	0.740771	0.489	0.279	2.10842e-45	1.75269
Vrk1	6.12067e-19	0.507054	0.281	0.161	1.08446e-14	1.74534
Cdh24	6.92609e-08	0.308798	0.136	0.078	0.00122716	1.74359
Usp13	8.27543e-16	0.347821	0.177	0.102	1.46624e-11	1.73529
Ccna2	4.56488e-09	0.34626	0.163	0.094	8.08806e-05	1.73404
Ncapd3	3.30717e-63	0.758019	0.527	0.304	5.85964e-59	1.73355
Haus6	4.17674e-22	0.518247	0.305	0.176	7.40035e-18	1.73295
Mcm4	4.53291e-10	0.350127	0.173	0.1	8.03142e-06	1.73
Wee1	9.61937e-14	0.42411	0.211	0.122	1.70436e-09	1.72951
Dck	9.72802e-08	0.287918	0.133	0.077	0.00172361	1.72727
Prrg1	1.20404e-10	0.310852	0.138	0.08	2.13331e-06	1.725
Ckap2l	2.98436e-20	0.415425	0.246	0.143	5.28769e-16	1.72028
Kif22	2.91759e-11	0.370567	0.194	0.113	5.16939e-07	1.71681
Racgap1	6.03934e-31	0.548477	0.343	0.2	1.07005e-26	1.715
Rbbp8	1.67018e-26	0.533097	0.312	0.182	2.95922e-22	1.71428
Pola1	1.50957e-158	1.13268	0.809	0.472	2.67466e-154	1.71398
Nusap1	2.72609e-16	0.448596	0.244	0.143	4.83009e-12	1.70629
Cdca7	2.22789e-09	0.277999	0.146	0.086	3.94737e-05	1.69767
Nphp4	2.67364e-10	0.261761	0.129	0.076	4.73716e-06	1.69737
Sae1	5.23697e-40	0.62423	0.425	0.251	9.27886e-36	1.69323
Tcf7l1	3.94503e-11	0.369781	0.171	0.101	6.98981e-07	1.69307
Ctps	1.73124e-21	0.431588	0.257	0.152	3.06742e-17	1.69079
Ccdc82	8.49739e-13	0.399753	0.213	0.126	1.50557e-08	1.69047
Tpx2	7.54078e-26	0.465035	0.36	0.213	1.33608e-21	1.69014
Hmgb2	4.09945e-21	0.431123	0.24	0.142	7.26341e-17	1.69014
Slco3a1	9.39129e-19	0.466847	0.223	0.132	1.66395e-14	1.68939
Sgo1	7.00039e-09	0.308619	0.16	0.095	0.000124033	1.68421
Ccdc138	3.36833e-05	0.282556	0.133	0.079	0.5968	1.68354
Cep192	3.79798e-36	0.65612	0.463	0.276	6.72926e-32	1.67754
Cdca7l	2.80618e-11	0.295057	0.161	0.096	4.97199e-07	1.67708
Hmgn2	5.61607e-11	0.31984	0.161	0.096	9.95055e-07	1.67708
Bub1b	1.94131e-16	0.408689	0.238	0.142	3.43961e-12	1.67606
Adamts20	9.29908e-28	0.569837	0.382	0.228	1.64761e-23	1.67544
Ndc1	7.89696e-19	0.408879	0.22	0.132	1.39918e-14	1.66667
Hirip3	1.92956e-11	0.369771	0.205	0.123	3.41879e-07	1.66667
Paics	9.54251e-12	0.278544	0.145	0.087	1.69074e-07	1.66666
Shroom2	1.33702e-05	0.26446	0.128	0.077	0.236893	1.66234
Ccp110	2.06765e-26	0.512141	0.327	0.197	3.66346e-22	1.6599
Rnf168	3.91959e-12	0.315456	0.156	0.094	6.94472e-08	1.65957
Pcgf5	1.42658e-13	0.40427	0.237	0.143	2.52762e-09	1.65734
Polh	2.5546e-08	0.299217	0.154	0.093	0.000452625	1.65591
Cdh8	5.92368e-43	0.71414	0.499	0.302	1.04956e-38	1.65232
Rfc2	2.21135e-15	0.28521	0.149	0.091	3.91807e-11	1.63736
Mdc1	1.78652e-14	0.449063	0.283	0.173	3.16535e-10	1.63584
Adcy2	9.44583e-19	0.455342	0.265	0.162	1.67361e-14	1.6358
Larp1b	9.20813e-08	0.263582	0.121	0.074	0.0016315	1.63513
Slc7a1	5.64878e-33	0.551092	0.356	0.218	1.00085e-28	1.63303
Usp1	8.54238e-18	0.381775	0.217	0.133	1.51354e-13	1.63158
Nxph1	1.42244e-14	0.498417	0.241	0.148	2.52028e-10	1.62838
Gjc1	2.97195e-22	0.516555	0.343	0.211	5.2657e-18	1.62559
Cklf	8.01843e-17	0.45073	0.276	0.17	1.42071e-12	1.62353
Fkbp5	3.41612e-14	0.422127	0.245	0.151	6.05269e-10	1.62252
Tnfaip8	4.85352e-28	0.563219	0.412	0.254	8.59947e-24	1.62205
Stxbp6	8.784e-54	0.716102	0.561	0.349	1.55635e-49	1.60745
Arhgef10	5.2162e-09	0.274703	0.138	0.086	9.24206e-05	1.60465
Tfdp1	2.9601e-22	0.482211	0.332	0.207	5.2447e-18	1.60386
Ncapd2	1.84335e-33	0.619037	0.468	0.292	3.26605e-29	1.60274
Tacc3	2.30344e-11	0.37707	0.242	0.151	4.08123e-07	1.60265
Gmds	1.55561e-33	0.631818	0.47	0.294	2.75623e-29	1.59864
Usp44	1.43678e-05	0.286597	0.155	0.097	0.254569	1.59794
Paxip1	3.64709e-25	0.517866	0.338	0.212	6.46191e-21	1.59434
Depdc1b	2.57221e-07	0.33803	0.21	0.132	0.00455744	1.59091
Rgs20	1.14822e-51	0.786845	0.587	0.369	2.03442e-47	1.59079
Ctdspl	1.08437e-15	0.436131	0.259	0.163	1.9213e-11	1.58896
Cep135	1.801e-23	0.476919	0.313	0.197	3.19102e-19	1.58883
Adgrv1	1.66972e-07	0.350069	0.17	0.107	0.00295841	1.58878
Kitl	1.18237e-15	0.440317	0.281	0.177	2.09493e-11	1.58757
Anp32b	4.11413e-18	0.480314	0.338	0.213	7.28941e-14	1.58685
Dock10	3.21252e-22	0.56726	0.349	0.22	5.69195e-18	1.58636
Ranbp1	1.16315e-12	0.313738	0.184	0.116	2.06087e-08	1.58621
Il4i1	4.57504e-05	0.268858	0.157	0.099	0.810606	1.58586
Kank1	1.61352e-14	0.463395	0.244	0.154	2.85884e-10	1.58441
Pex5l	5.23918e-23	0.564493	0.396	0.25	9.28278e-19	1.584
Zw10	1.75925e-08	0.283975	0.163	0.103	0.000311705	1.58252
Cdyl2	5.89609e-06	0.254753	0.125	0.079	0.104467	1.58228
Cntln	4.08293e-44	0.684249	0.52	0.329	7.23414e-40	1.58055
Kif20b	1.47123e-15	0.377385	0.398	0.252	2.60672e-11	1.57936
Ect2	7.97897e-20	0.392321	0.319	0.202	1.41371e-15	1.57921
Clic4	1.96507e-24	0.535259	0.363	0.23	3.48172e-20	1.57826
Hhip	6.31237e-30	0.578269	0.416	0.264	1.11843e-25	1.57576
Cenpj	1.70264e-18	0.413657	0.271	0.172	3.01674e-14	1.57558
Usp37	4.56375e-36	0.554771	0.425	0.27	8.08605e-32	1.57407
Aim2	2.30474e-10	0.389787	0.196	0.125	4.08354e-06	1.568
Kif23	5.52766e-16	0.308198	0.285	0.182	9.7939e-12	1.56593
Vsx2	9.18545e-12	0.417815	0.22	0.141	1.62748e-07	1.56028
Mre11a	6.32871e-10	0.364699	0.22	0.141	1.12132e-05	1.56028
Med12l	2.09996e-79	0.827729	0.706	0.453	3.72071e-75	1.5585
Nasp	2.47726e-77	0.772758	0.688	0.442	4.38921e-73	1.55656
Tmpo	9.6047e-52	0.682189	0.616	0.396	1.70176e-47	1.55556
Ckap2	8.35733e-15	0.348359	0.227	0.146	1.48075e-10	1.55479
Mdga2	1.76319e-29	0.657734	0.466	0.3	3.12401e-25	1.55333
Rfc1	1.00266e-29	0.570914	0.453	0.292	1.77651e-25	1.55137
Nup155	2.39483e-28	0.504748	0.381	0.246	4.24315e-24	1.54878
Kcnq3	3.88608e-38	0.677574	0.562	0.363	6.88536e-34	1.54821
Ipo5	4.73157e-20	0.424385	0.301	0.195	8.38339e-16	1.54359
E2f1	3.26601e-08	0.269588	0.165	0.107	0.000578671	1.54205
Nup85	6.73865e-16	0.374213	0.24	0.156	1.19395e-11	1.53846
Kctd8	2.8386e-25	0.508471	0.378	0.246	5.02943e-21	1.53658
Garem1	8.77081e-07	0.291707	0.192	0.125	0.0155401	1.536
Nop56	6.14658e-15	0.44539	0.35	0.228	1.08905e-10	1.53509
Tbc1d1	2.56663e-11	0.395794	0.267	0.174	4.54756e-07	1.53448
Mcph1	3.27326e-38	0.635273	0.56	0.365	5.79957e-34	1.53425
Rif1	3.14851e-61	0.704294	0.641	0.418	5.57853e-57	1.53349
Rangap1	1.62425e-22	0.405988	0.277	0.181	2.87784e-18	1.53039
Cep290	2.87659e-16	0.475486	0.341	0.223	5.09674e-12	1.52915
Rtkn2	1.00926e-07	0.332415	0.194	0.127	0.00178822	1.52756
Lbr	1.25277e-14	0.460676	0.339	0.222	2.21966e-10	1.52703
Mis18bp1	2.34809e-11	0.296901	0.287	0.188	4.16035e-07	1.52659
Grin3a	1.16794e-18	0.414164	0.319	0.209	2.06936e-14	1.52632
Xntrpc	1.31963e-11	0.352957	0.233	0.153	2.33813e-07	1.52287
Tubgcp3	3.03923e-09	0.365888	0.273	0.18	5.38491e-05	1.51667
Cars	1.35185e-05	0.291332	0.159	0.105	0.239521	1.51428
Smc6	1.099e-38	0.600701	0.502	0.332	1.94721e-34	1.51205
Plscr4	1.64819e-06	0.30223	0.192	0.127	0.0292026	1.51181
Rbbp7	7.85069e-16	0.385893	0.264	0.175	1.39098e-11	1.50857
Dbf4	2.28883e-09	0.320392	0.193	0.128	4.05535e-05	1.50781
Alg13	2.06894e-12	0.356109	0.226	0.15	3.66574e-08	1.50667
Prkd1	5.39155e-28	0.476304	0.467	0.31	9.55276e-24	1.50645
Eri1	4.87131e-07	0.259781	0.146	0.097	0.00863099	1.50515
Kif18b	1.5578e-08	0.266376	0.198	0.132	0.000276011	1.5
Slc20a1	1.87444e-09	0.272633	0.168	0.112	3.32114e-05	1.5
Prr11	5.45897e-05	0.272202	0.168	0.112	0.967221	1.5
Slc24a2	3.07545e-11	0.312774	0.147	0.098	5.44908e-07	1.5
Nhs	3.2368e-36	0.566631	0.511	0.341	5.73496e-32	1.49853
Suz12	1.00885e-27	0.529944	0.458	0.306	1.78749e-23	1.49673
Ctdspl2	6.3011e-18	0.474747	0.389	0.26	1.11643e-13	1.49615
Aars	2.81549e-07	0.256322	0.154	0.103	0.00498849	1.49514
Chsy3	9.95313e-12	0.389027	0.23	0.154	1.7635e-07	1.49351
Npat	3.85596e-12	0.405451	0.312	0.209	6.83199e-08	1.49282
Ppat	1.27085e-08	0.273802	0.183	0.123	0.000225169	1.4878
Gli2	6.93314e-105	0.843659	0.847	0.57	1.22841e-100	1.48596
Sh3rf1	0.000494302	0.275093	0.156	0.105	1	1.48571
Nfya	6.97395e-06	0.267767	0.153	0.103	0.123564	1.48544
Slc44a5	2.13136e-12	0.266073	0.193	0.13	3.77634e-08	1.48461
Kif18a	2.91473e-10	0.325869	0.279	0.188	5.16431e-06	1.48404
Kcnq5	6.23032e-46	0.309628	0.721	0.486	1.10389e-41	1.48354
Pkp4	2.08446e-35	0.553843	0.594	0.401	3.69325e-31	1.4813
Pard3b	1.11754e-80	0.764842	0.758	0.513	1.98005e-76	1.47758
Lmnb1	1.35887e-31	0.546623	0.534	0.362	2.40764e-27	1.47514
Cep57	1.17081e-12	0.323726	0.224	0.152	2.07444e-08	1.47368
Casp8ap2	4.05148e-11	0.393197	0.318	0.216	7.17841e-07	1.47222
Lgr5	7.08699e-15	0.259329	0.153	0.104	1.25567e-10	1.47115
E2f3	9.77631e-41	0.608743	0.553	0.376	1.73217e-36	1.47074
Sfmbt1	1.53517e-35	0.553409	0.522	0.355	2.72001e-31	1.47042
Azin1	2.74224e-11	0.362456	0.279	0.19	4.8587e-07	1.46842
Eya4	7.66198e-29	0.509755	0.508	0.346	1.35755e-24	1.46821
Ccnf	4.81586e-07	0.26859	0.198	0.135	0.00853275	1.46667
Dcbld2	2.60001e-16	0.387817	0.305	0.208	4.60669e-12	1.46635
Col4a2	1.48161e-11	0.446308	0.236	0.161	2.62512e-07	1.46584
Srsf10	6.35608e-24	0.437671	0.413	0.282	1.12617e-19	1.46454
Dgcr8	6.56455e-15	0.424599	0.35	0.239	1.16311e-10	1.46443
Mthfd1l	7.05916e-21	0.492568	0.401	0.274	1.25074e-16	1.4635
Brip1os	9.63792e-16	0.476305	0.379	0.259	1.70765e-11	1.46332
Angptl2	2.65622e-08	0.30045	0.247	0.169	0.000470629	1.46154
Ska2	3.30127e-12	0.32169	0.235	0.161	5.84919e-08	1.45963
Hpca	7.19471e-15	0.425095	0.299	0.205	1.27476e-10	1.45854
Mpdz	9.25428e-26	0.513899	0.516	0.354	1.63967e-21	1.45763
Itpr1	6.09231e-16	0.445927	0.374	0.257	1.07944e-11	1.45525
Ptprm	7.18133e-11	0.353352	0.256	0.176	1.27239e-06	1.45454
H2afv	1.33664e-07	0.329899	0.237	0.163	0.00236826	1.45399
Pa2g4	3.09028e-13	0.33971	0.282	0.194	5.47536e-09	1.45361
Ccdc34	4.84847e-10	0.374421	0.282	0.194	8.59051e-06	1.45361
Ccdc18	2.0675e-07	0.332566	0.234	0.161	0.0036632	1.45342
Vars	1.42429e-10	0.28031	0.199	0.137	2.52356e-06	1.45255
Ddx11	1.48447e-05	0.251806	0.161	0.111	0.263019	1.45045
Sass6	2.76956e-11	0.314164	0.223	0.154	4.9071e-07	1.44805
Hjurp	7.93202e-49	0.569292	0.683	0.472	1.40539e-44	1.44703
Nup107	2.39274e-13	0.3033	0.217	0.15	4.23946e-09	1.44667
Nr3c1	4.24204e-17	0.398448	0.331	0.23	7.51604e-13	1.43913
Nup133	6.33419e-12	0.289895	0.21	0.146	1.12229e-07	1.43836
Tmtc1	6.61498e-17	0.489948	0.407	0.283	1.17204e-12	1.43816
Cdc25a	4.86396e-07	0.26907	0.184	0.128	0.00861797	1.4375
Rtel1	1.26457e-06	0.279424	0.204	0.142	0.0224057	1.43662
Galnt13	8.40521e-26	0.475404	0.497	0.346	1.48924e-21	1.43642
Diaph2	3.15798e-37	0.565815	0.567	0.395	5.59531e-33	1.43544
Bcar3	6.2229e-08	0.359241	0.228	0.159	0.00110257	1.43396
Nedd1	2.04862e-07	0.272681	0.195	0.136	0.00362975	1.43382
Pfas	9.60283e-08	0.272181	0.212	0.148	0.00170143	1.43243
Mcm9	1.31792e-06	0.276567	0.212	0.148	0.023351	1.43243
Prkg1	0.000121364	0.278014	0.159	0.111	1	1.43243
Srsf4	1.17806e-24	0.458807	0.418	0.292	2.08728e-20	1.43151
Mpp6	1.57851e-10	0.346858	0.296	0.207	2.79681e-06	1.42995
Nup210	5.23428e-17	0.414017	0.38	0.266	9.27409e-13	1.42857
Rad50	1.27384e-08	0.298391	0.198	0.139	0.0002257	1.42446
Arhgap10	1.64782e-16	0.445564	0.376	0.264	2.91961e-12	1.42424
Atm	9.41803e-25	0.464399	0.449	0.316	1.66869e-20	1.42089
Lin9	8.56142e-08	0.284298	0.213	0.15	0.00151691	1.42
Gm48530	8.69982e-06	0.285317	0.207	0.146	0.154143	1.41781
Ddr2	7.93712e-21	0.463856	0.411	0.29	1.4063e-16	1.41724
Col4a1	8.5698e-12	0.361007	0.228	0.161	1.5184e-07	1.41615
Yars	2.39815e-06	0.269391	0.191	0.135	0.0424904	1.41481
Nup160	3.60256e-11	0.328385	0.287	0.203	6.38301e-07	1.41379
Prc1	2.70351e-06	0.253272	0.247	0.175	0.0479008	1.41143
Pcnt	1.73747e-18	0.450464	0.444	0.315	3.07844e-14	1.40952
Kcnt2	5.4629e-10	0.375294	0.241	0.171	9.67916e-06	1.40936
Sgms1	3.6181e-08	0.369968	0.303	0.215	0.000641055	1.4093
Sorcs2	4.00199e-14	0.397046	0.396	0.281	7.09073e-10	1.40925
Rgma	2.94054e-13	0.360805	0.321	0.228	5.21005e-09	1.40789
Ahctf1	3.38192e-14	0.457358	0.436	0.31	5.99209e-10	1.40645
Naa50	4.76743e-06	0.278204	0.215	0.153	0.0844694	1.40523
Pms1	0.0229631	0.310421	0.247	0.176	1	1.40341
Ndufaf2	5.19807e-08	0.272221	0.216	0.154	0.000920995	1.4026
Pcsk5	1.67158e-07	0.278917	0.192	0.137	0.00296171	1.40146
Hk2	4.87449e-15	0.299795	0.241	0.172	8.63662e-11	1.40116
Dpyd	4.02423e-07	0.321337	0.224	0.16	0.00713014	1.4
Ptges3	1.34822e-07	0.276966	0.21	0.15	0.00238878	1.4
Raly	3.04184e-19	0.438224	0.433	0.31	5.38954e-15	1.39677
Lrrc8c	3.53472e-09	0.275246	0.216	0.155	6.26282e-05	1.39355
Supt16	6.21127e-22	0.473133	0.489	0.351	1.10051e-17	1.39316
Sgcd	6.92064e-26	0.67332	0.547	0.393	1.2262e-21	1.39186
Pitpnm2	3.79941e-14	0.382464	0.398	0.286	6.73179e-10	1.39161
Cse1l	6.86201e-10	0.318876	0.263	0.189	1.21581e-05	1.39153
Epb41l2	2.48196e-16	0.437266	0.417	0.3	4.39753e-12	1.39
Anp32e	2.56302e-07	0.347743	0.314	0.226	0.00454115	1.38938
Ipo7	2.14084e-15	0.395989	0.404	0.291	3.79314e-11	1.38832
Taco1	9.90239e-11	0.378608	0.265	0.191	1.75451e-06	1.38743
Ncaph2	8.29856e-07	0.252283	0.197	0.142	0.0147034	1.38732
Ssrp1	1.61476e-15	0.339577	0.287	0.207	2.86103e-11	1.38647
Cdk5rap2	3.5724e-44	0.569753	0.643	0.464	6.32957e-40	1.38578
Mthfd1	4.52625e-10	0.286006	0.223	0.161	8.01961e-06	1.38509
Grid2ip	8.92672e-13	0.35573	0.336	0.243	1.58164e-08	1.38272
Adamts1	1.82934e-07	0.27429	0.206	0.149	0.00324122	1.38255
Bcl2	6.68255e-06	0.3205	0.246	0.178	0.118401	1.38202
Nup93	1.85917e-10	0.279835	0.228	0.165	3.29408e-06	1.38182
Smchd1	1.96777e-45	0.597263	0.677	0.49	3.4865e-41	1.38163
Nap1l1	3.0371e-28	0.425457	0.464	0.336	5.38113e-24	1.38095
Ift80	4.72856e-07	0.333014	0.298	0.216	0.00837807	1.37963
Rttn	1.00966e-13	0.380352	0.338	0.245	1.78892e-09	1.37959
Senp1	1.06301e-10	0.364893	0.331	0.24	1.88344e-06	1.37917
Pde5a	2.06889e-11	0.310171	0.251	0.182	3.66566e-07	1.37912
Lrig3	3.02112e-45	0.502175	0.66	0.479	5.35282e-41	1.37787
Khdrbs3	1.40132e-08	0.349102	0.314	0.228	0.000248286	1.37719
Fancm	4.9733e-07	0.293146	0.245	0.178	0.00881169	1.3764
Ybx3	6.25491e-05	0.306307	0.267	0.194	1	1.37629
Notch2	3.20328e-09	0.290777	0.26	0.189	5.67557e-05	1.37566
Mum1	8.10211e-05	0.295649	0.26	0.189	1	1.37566
Kcnh5	2.98939e-10	0.355812	0.382	0.278	5.2966e-06	1.3741
Alcam	1.01691e-32	0.549307	0.643	0.468	1.80176e-28	1.37393
Cep250	7.86867e-10	0.333334	0.302	0.22	1.39417e-05	1.37273
Tbata	5.39738e-07	0.296321	0.262	0.191	0.00956307	1.37173
Unc80	9.73179e-08	0.262928	0.252	0.184	0.00172428	1.36956
Ezh2	8.08798e-43	0.601574	0.709	0.518	1.43303e-38	1.36873
Hpf1	4.10716e-09	0.254246	0.197	0.144	7.27706e-05	1.36805
Dleu2	2.81695e-32	0.538251	0.61	0.446	4.99106e-28	1.36771
Oxct1	1.94704e-21	0.445	0.474	0.347	3.44977e-17	1.36599
Actn4	1.11582e-14	0.356414	0.31	0.227	1.97701e-10	1.36564
Utrn	1.89166e-16	0.400231	0.415	0.304	3.35165e-12	1.36513
Dnajc21	8.31854e-06	0.251403	0.202	0.148	0.147388	1.36486
Snx25	2.09769e-12	0.337579	0.318	0.233	3.71668e-08	1.36481
Cdh4	1.73322e-40	0.602428	0.73	0.535	3.07092e-36	1.36449
Otud4	9.93356e-15	0.414516	0.438	0.321	1.76003e-10	1.36449
Tpm4	1.12208e-06	0.284161	0.21	0.154	0.0198809	1.36364
Cmtm4	1.95341e-12	0.369235	0.384	0.282	3.46105e-08	1.3617
Lyst	5.27943e-10	0.3806	0.396	0.291	9.3541e-06	1.36082
Fosb	2.58793e-11	0.451832	0.359	0.264	4.5853e-07	1.35985
Fat1	1.42264e-09	0.322579	0.326	0.24	2.52064e-05	1.35833
Neto2	2.67966e-12	0.362562	0.323	0.238	4.74783e-08	1.35714
Nop58	4.15144e-14	0.35346	0.393	0.29	7.35551e-10	1.35517
Dpy19l1	3.86781e-05	0.264178	0.231	0.171	0.685298	1.35088
Galnt2	1.01948e-16	0.397209	0.393	0.291	1.80632e-12	1.35051
Tshz3	2.7176e-14	0.3721	0.397	0.294	4.81505e-10	1.35034
Dock1	2.40653e-64	0.606098	0.821	0.608	4.26389e-60	1.35033
Cep162	1.66549e-08	0.319226	0.306	0.227	0.000295091	1.34802
Pdlim3	2.90689e-20	0.288894	0.478	0.355	5.15043e-16	1.34648
Samd4	1.73805e-06	0.314811	0.23	0.171	0.0307947	1.34503
Ipo9	1.51148e-11	0.346482	0.356	0.265	2.67804e-07	1.3434
Srsf7	1.34791e-11	0.334451	0.36	0.268	2.38823e-07	1.34328
Nup153	1.14075e-12	0.402999	0.458	0.341	2.02118e-08	1.34311
Baz1b	9.92529e-38	0.532238	0.666	0.496	1.75856e-33	1.34274
Gstcd	2.04012e-09	0.314442	0.286	0.213	3.61468e-05	1.34272
Simc1	2.38642e-07	0.271436	0.241	0.18	0.00422825	1.33889
Mob3b	5.01661e-05	0.270514	0.293	0.219	0.888843	1.3379
Ptprj	3.88675e-07	0.28123	0.266	0.199	0.00688655	1.33668
Abr	3.42982e-11	0.325082	0.29	0.217	6.07695e-07	1.3364
Mamdc2	9.35128e-06	0.265332	0.247	0.185	0.165686	1.33513
Smc1a	5.12233e-18	0.423956	0.51	0.382	9.07574e-14	1.33508
Eefsec	1.28007e-08	0.277438	0.259	0.194	0.000226803	1.33505
Taf1d	2.16417e-10	0.396766	0.468	0.351	3.83448e-06	1.33333
Epha5	2.70486e-07	0.33211	0.257	0.193	0.00479247	1.33161
Mid1	2.89017e-06	0.252619	0.237	0.178	0.051208	1.33146
Hnrnpa3	2.11918e-11	0.348253	0.394	0.296	3.75476e-07	1.33108
Taf1	2.03488e-07	0.332444	0.35	0.263	0.0036054	1.3308
Nsd2	2.64665e-79	0.705132	0.821	0.617	4.68933e-75	1.33063
Wrn	2.69182e-05	0.297176	0.282	0.212	0.476936	1.33019
Chsy1	3.05514e-08	0.297121	0.319	0.24	0.00054131	1.32917
Cbx5	4.09502e-35	0.541272	0.699	0.526	7.25556e-31	1.3289
Jph1	1.40281e-06	0.316869	0.279	0.21	0.0248549	1.32857
Kpnb1	5.43218e-19	0.370409	0.385	0.29	9.62474e-15	1.32759
Mcm7	5.00665e-05	0.27533	0.272	0.205	0.887078	1.32683
Ankrd44	6.45773e-28	0.433518	0.532	0.401	1.14418e-23	1.32668
Hmgb1	6.24816e-15	0.338783	0.367	0.277	1.10705e-10	1.32491
Ptch2	2.45931e-28	0.433184	0.596	0.45	4.3574e-24	1.32444
Rbbp4	4.64586e-08	0.350448	0.38	0.287	0.000823153	1.32404
Pdzd8	8.35325e-10	0.301865	0.303	0.229	1.48003e-05	1.32314
Pcx	5.27192e-07	0.291966	0.258	0.195	0.00934079	1.32308
Pam	6.27002e-12	0.346426	0.369	0.279	1.11092e-07	1.32258
Slc20a2	4.96037e-13	0.316046	0.287	0.217	8.78878e-09	1.32258
Smc5	5.46248e-21	0.434475	0.517	0.391	9.67843e-17	1.32225
Farp1	4.57046e-19	0.465444	0.517	0.391	8.09794e-15	1.32225
Snx5	1.61198e-09	0.266363	0.275	0.208	2.8561e-05	1.32211
Gm47283	8.91471e-32	0.581621	0.678	0.513	1.57951e-27	1.32164
Mettl9	3.80653e-06	0.251586	0.263	0.199	0.0674441	1.32161
Nup188	1.57351e-11	0.292605	0.28	0.212	2.78794e-07	1.32075
Trim37	2.58055e-10	0.36035	0.383	0.29	4.57221e-06	1.32069
Papss1	7.85291e-07	0.274398	0.243	0.184	0.0139138	1.32065
Rad21	5.63881e-09	0.320884	0.466	0.353	9.99085e-05	1.32011
Cep83	1.2432e-12	0.400326	0.468	0.355	2.2027e-08	1.31831
Alms1	6.46586e-13	0.397086	0.493	0.374	1.14562e-08	1.31818
Cep295	1.79634e-12	0.359842	0.406	0.308	3.18275e-08	1.31818
Srbd1	9.70675e-10	0.340458	0.382	0.29	1.71984e-05	1.31724
Fndc3b	2.97946e-05	0.251054	0.245	0.186	0.5279	1.3172
Slc8a1	4.05887e-08	0.371741	0.362	0.275	0.000719151	1.31636
Cbfb	1.15139e-14	0.362188	0.396	0.301	2.04003e-10	1.31561
Ccnd1	1.56984e-13	0.328931	0.465	0.354	2.78145e-09	1.31356
Epb41l5	7.4907e-05	0.255865	0.231	0.176	1	1.3125
Ipo11	1.33809e-14	0.351243	0.448	0.343	2.37084e-10	1.30612
Angpt1	9.10982e-07	0.258902	0.184	0.141	0.0161408	1.30496
Cep112	1.00817e-06	0.338325	0.297	0.228	0.0178627	1.30263
Stt3b	8.83068e-12	0.347607	0.422	0.324	1.56462e-07	1.30247
Gars	9.95085e-07	0.251611	0.216	0.166	0.0176309	1.3012
Crybg3	3.95614e-09	0.309068	0.346	0.266	7.00948e-05	1.30075
Asap1	2.06294e-33	0.487181	0.733	0.564	3.65512e-29	1.29965
Orc2	3.92604e-08	0.256809	0.256	0.197	0.000695615	1.29949
Hnrnpd	9.74768e-15	0.4104	0.534	0.411	1.72709e-10	1.29927
Pds5a	2.14601e-35	0.510374	0.682	0.525	3.80231e-31	1.29905
Gab2	2.68704e-05	0.250556	0.235	0.181	0.47609	1.29834
Msh3	9.14196e-08	0.283477	0.301	0.232	0.00161977	1.29741
G3bp1	2.63517e-08	0.294309	0.328	0.253	0.000466899	1.29644
Sp1	7.01767e-07	0.254019	0.289	0.223	0.0124339	1.29596
Tra2b	2.50533e-18	0.365612	0.488	0.377	4.43894e-14	1.29443
Lin52	9.573e-07	0.288979	0.308	0.238	0.0169614	1.29412
Slf1	4.98296e-15	0.356467	0.494	0.382	8.82881e-11	1.29319
Adk	1.74989e-19	0.418205	0.573	0.444	3.10045e-15	1.29054
Efna5	8.804e-30	0.473336	0.67	0.52	1.55989e-25	1.28846
Brpf1	5.66477e-10	0.272051	0.313	0.243	1.00368e-05	1.28807
Gria3	1.21423e-11	0.322543	0.454	0.353	2.15137e-07	1.28612
Ranbp17	3.77597e-16	0.430954	0.549	0.427	6.69026e-12	1.28571
Sp3	8.14018e-10	0.306209	0.374	0.291	1.44228e-05	1.28522
Ckap5	2.45549e-10	0.253758	0.536	0.418	4.35064e-06	1.2823
Sclt1	3.99326e-11	0.364988	0.46	0.359	7.07526e-07	1.28134
Baz1a	5.1981e-06	0.286076	0.374	0.292	0.0921	1.28082
Slf2	6.56932e-09	0.299323	0.388	0.303	0.000116395	1.28053
Slc10a7	2.0073e-18	0.368763	0.493	0.385	3.55653e-14	1.28052
Nup205	3.16458e-05	0.28252	0.331	0.259	0.5607	1.27799
Aff2	5.43443e-15	0.391774	0.512	0.401	9.62872e-11	1.27681
Hnrnpul1	2.85716e-15	0.348777	0.481	0.377	5.06232e-11	1.27586
Dtnb	1.86252e-09	0.318754	0.37	0.29	3.3e-05	1.27586
Boc	1.91722e-38	0.462906	0.822	0.645	3.39692e-34	1.27442
Rnf144a	1.28315e-10	0.309434	0.372	0.293	2.27349e-06	1.26962
Frmd4b	8.84201e-80	0.686847	0.903	0.712	1.56663e-75	1.26826
Thrap3	4.49672e-16	0.363459	0.549	0.433	7.96729e-12	1.2679
Grid2	1.72657e-58	0.549051	0.862	0.68	3.05914e-54	1.26765
Gsg1l	7.86203e-55	0.460169	0.898	0.709	1.393e-50	1.26657
Ubap2	1.17285e-14	0.337126	0.462	0.365	2.07806e-10	1.26575
Map3k3	5.48656e-08	0.302833	0.383	0.303	0.000972108	1.26403
Dlgap1	8.30944e-35	0.523878	0.728	0.576	1.47227e-30	1.26389
Syne2	8.88383e-61	0.611907	0.848	0.671	1.57404e-56	1.26379
Ppp4r3a	2.17867e-11	0.318792	0.417	0.33	3.86017e-07	1.26364
Smc3	4.63237e-11	0.370455	0.513	0.406	8.20764e-07	1.26355
Rai14	7.17702e-09	0.322525	0.398	0.315	0.000127162	1.26349
Homer2	0.000212318	0.251345	0.317	0.251	1	1.26295
Prkd3	1.80693e-07	0.267645	0.38	0.301	0.00320152	1.26246
Kpna3	2.86411e-11	0.285728	0.371	0.294	5.07463e-07	1.2619
Ttll4	4.78286e-10	0.269339	0.352	0.279	8.47428e-06	1.26165
Atp13a3	2.44456e-11	0.311534	0.473	0.375	4.33126e-07	1.26133
Supt3	1.14484e-07	0.291546	0.358	0.284	0.00202843	1.26056
Dcaf1	1.54334e-07	0.308682	0.397	0.315	0.00273449	1.26032
Adgrl2	8.72886e-10	0.3391	0.488	0.388	1.54658e-05	1.25773
Zhx3	9.36678e-15	0.314629	0.447	0.356	1.65961e-10	1.25562
Stag2	3.35385e-16	0.380159	0.601	0.479	5.94236e-12	1.2547
Lpin2	1.4877e-08	0.292931	0.44	0.351	0.000263591	1.25356
Vcan	7.72331e-12	0.377798	0.471	0.376	1.36842e-07	1.25266
Nsmce2	1.01847e-17	0.380866	0.605	0.484	1.80452e-13	1.25
H2afy	1.82367e-05	0.291836	0.445	0.356	0.323118	1.25
Mcmbp	7.68758e-08	0.264496	0.382	0.306	0.00136209	1.24837
Irs1	5.49001e-18	0.331986	0.63	0.505	9.72719e-14	1.24752
Asap2	6.99156e-10	0.29979	0.445	0.357	1.23876e-05	1.2465
Elf2	1.62027e-08	0.27381	0.41	0.329	0.00028708	1.2462
Lcorl	2.97389e-18	0.352858	0.568	0.456	5.26914e-14	1.24561
Hnrnpab	1.03859e-05	0.252555	0.32	0.257	0.184018	1.24514
Nin	1.67953e-18	0.291445	0.514	0.413	2.97578e-14	1.24455
Psip1	5.19221e-12	0.315129	0.469	0.377	9.19956e-08	1.24403
Rev1	9.98491e-10	0.283844	0.434	0.349	1.76913e-05	1.24355
Ust	3.17801e-13	0.274389	0.595	0.479	5.63079e-09	1.24217
Rasal2	2.18998e-10	0.329341	0.5	0.403	3.88021e-06	1.24069
Serinc5	1.04796e-05	0.278385	0.366	0.295	0.185677	1.24068
Atrnl1	1.2987e-18	0.395831	0.65	0.524	2.30105e-14	1.24046
Ssbp2	9.70024e-22	0.355887	0.677	0.546	1.71869e-17	1.23993
Rbms1	4.43058e-21	0.459758	0.678	0.547	7.85011e-17	1.23949
Pcdh7	9.36449e-08	0.321801	0.43	0.347	0.0016592	1.23919
Brd8	3.56665e-11	0.302881	0.498	0.402	6.31939e-07	1.23881
Sf1	3.51507e-13	0.296686	0.462	0.373	6.22801e-09	1.23861
Vps13a	6.06494e-06	0.250359	0.291	0.235	0.107459	1.2383
Nap1l4	2.0062e-05	0.25155	0.364	0.294	0.355458	1.23809
Atxn2l	2.71372e-09	0.296965	0.419	0.339	4.80817e-05	1.23599
Taf15	1.11472e-13	0.335696	0.55	0.445	1.97506e-09	1.23595
Mpp7	1.73262e-05	0.289077	0.42	0.34	0.306986	1.23529
Srrm1	1.62803e-10	0.329461	0.536	0.434	2.88455e-06	1.23502
Elmsan1	0.000152021	0.266082	0.305	0.247	1	1.23482
Immp2l	9.96461e-06	0.253422	0.221	0.179	0.176553	1.23464
Zfp704	1.19982e-47	0.534832	0.837	0.678	2.12583e-43	1.23451
Serbp1	1.02772e-09	0.308155	0.537	0.435	1.82091e-05	1.23448
Brd3	9.42807e-07	0.281842	0.393	0.319	0.0167046	1.23197
Ebf2	1.59454e-12	0.26039	0.42	0.341	2.82521e-08	1.23167
Etv6	7.28239e-07	0.273877	0.448	0.364	0.0129029	1.23077
Nrf1	3.06691e-13	0.306533	0.491	0.399	5.43394e-09	1.23058
Arhgap32	1.61521e-08	0.31041	0.481	0.391	0.000286182	1.23018
Emsy	6.508e-12	0.29335	0.45	0.366	1.15309e-07	1.22951
Lrch1	2.26637e-09	0.267378	0.376	0.306	4.01555e-05	1.22876
Znrf3	1.58268e-12	0.277124	0.514	0.419	2.80419e-08	1.22673
Xpo1	1.81639e-15	0.327383	0.603	0.492	3.21828e-11	1.22561
Ptma	4.78909e-09	0.288941	0.442	0.361	8.4853e-05	1.22438
Sept11	2.06197e-08	0.271803	0.421	0.344	0.00036534	1.22384
Egfem1	6.80284e-13	0.367539	0.571	0.467	1.20533e-08	1.2227
Tubb5	7.93167e-09	0.305194	0.426	0.349	0.000140533	1.22063
Tcerg1	6.29873e-19	0.33193	0.594	0.487	1.11601e-14	1.21971
Scaf11	6.04632e-09	0.288461	0.45	0.369	0.000107129	1.21951
Ctcf	6.08855e-05	0.260653	0.403	0.331	1	1.21752
Smarcc1	1.30725e-21	0.354096	0.675	0.555	2.31619e-17	1.21622
Bahcc1	1.35035e-17	0.331322	0.614	0.505	2.39254e-13	1.21584
Mad1l1	5.70304e-05	0.256126	0.355	0.292	1	1.21575
Rassf3	6.53842e-17	0.272692	0.661	0.545	1.15848e-12	1.21284
Ptprk	1.33234e-17	0.288542	0.625	0.516	2.36064e-13	1.21124
Ncl	4.97837e-16	0.332021	0.656	0.542	8.82068e-12	1.21033
Cux1	6.61165e-43	0.513658	0.809	0.669	1.17145e-38	1.20927
Tle4	1.14616e-06	0.289471	0.487	0.403	0.0203077	1.20844
Rb1	1.01858e-09	0.287696	0.472	0.391	1.80472e-05	1.20716
St3gal3	5.74779e-12	0.263639	0.433	0.359	1.01839e-07	1.20613
Eif4g1	6.2403e-11	0.29086	0.604	0.502	1.10566e-06	1.20319
Dock11	3.23445e-17	0.301598	0.602	0.501	5.7308e-13	1.2016
Hnrnpl	4.29679e-05	0.276278	0.45	0.375	0.761306	1.2
Hnrnpr	2.54203e-13	0.267179	0.531	0.443	4.50397e-09	1.19865
Fus	2.44881e-22	0.359159	0.7	0.584	4.3388e-18	1.19863
Memo1	6.34396e-06	0.266382	0.466	0.389	0.112402	1.19794
Magi3	1.29081e-08	0.26006	0.543	0.454	0.000228706	1.19603
Dhx9	1.10903e-17	0.302122	0.63	0.527	1.96498e-13	1.19545
Dyrk1a	1.45348e-23	0.339699	0.655	0.548	2.57528e-19	1.19526
Dync2h1	7.65224e-09	0.268631	0.559	0.468	0.000135582	1.19444
Wwox	6.33343e-21	0.341272	0.738	0.618	1.12216e-16	1.19417
Pds5b	2.63726e-17	0.354756	0.708	0.593	4.6727e-13	1.19393
Eif3a	8.69043e-10	0.280227	0.585	0.49	1.53977e-05	1.19388
Chchd3	5.17667e-07	0.27321	0.54	0.453	0.00917203	1.19205
Pkn2	2.57536e-09	0.281043	0.472	0.396	4.56303e-05	1.19192
Dock3	3.77717e-17	0.343295	0.657	0.552	6.69239e-13	1.19022
Adgrl1	1.41803e-07	0.267597	0.421	0.354	0.00251247	1.18927
Eml4	1.30491e-06	0.251523	0.467	0.393	0.0231203	1.18829
Trps1	4.7302e-16	0.26631	0.673	0.57	8.38097e-12	1.1807
Matr3	8.27098e-12	0.286442	0.621	0.528	1.46545e-07	1.17614
Faf1	2.98696e-11	0.292326	0.625	0.532	5.2923e-07	1.17481
Tra2a	1.42448e-07	0.253194	0.51	0.435	0.00252389	1.17241
Pard3	6.0695e-19	0.295449	0.777	0.663	1.07539e-14	1.17195
Mast2	2.85148e-07	0.267673	0.592	0.506	0.00505225	1.16996
Nalcn	1.21869e-12	0.332003	0.622	0.532	2.15927e-08	1.16917
Ptch1	3.67239e-53	0.457738	0.939	0.804	6.50673e-49	1.16791
Stag1	1.97444e-50	0.507878	0.875	0.753	3.49832e-46	1.16202
Cdk6	1.95377e-42	0.391699	0.92	0.792	3.46168e-38	1.16162
Smyd3	2.36809e-06	0.261379	0.597	0.515	0.0419578	1.15922
Syncrip	5.26114e-13	0.258835	0.609	0.528	9.32169e-09	1.15341
Ncoa2	2.89091e-18	0.299934	0.692	0.601	5.12212e-14	1.15141
Fry	3.03407e-10	0.258842	0.662	0.576	5.37576e-06	1.14931
Cadm1	2.18238e-24	0.29124	0.933	0.813	3.86674e-20	1.1476
Exoc4	2.11871e-25	0.402438	0.859	0.75	3.75394e-21	1.14533
Pbrm1	9.12916e-14	0.265044	0.71	0.622	1.61751e-09	1.14148
Ankrd11	1.63983e-22	0.31047	0.787	0.695	2.90545e-18	1.13237
Hs3st5	5.48702e-45	0.459143	0.9	0.796	9.72191e-41	1.13065
Sipa1l3	1.11499e-13	0.258134	0.768	0.68	1.97555e-09	1.12941
Hnrnpa2b1	6.5185e-20	0.268383	0.807	0.718	1.15495e-15	1.12396
Hnrnpu	7.88627e-17	0.273223	0.824	0.734	1.39729e-12	1.12262
Rims2	8.11746e-24	0.354574	0.874	0.781	1.43825e-19	1.11908
Foxp2	7.90834e-27	0.35771	0.92	0.824	1.4012e-22	1.1165
Cdh20	1.1847e-59	0.435312	0.988	0.887	2.09905e-55	1.11387
Grip1	1.19814e-22	0.324246	0.923	0.83	2.12286e-18	1.11205
Phip	4.40587e-18	0.265385	0.848	0.764	7.80632e-14	1.10995
Lrrc7	2.87163e-71	0.533946	0.962	0.867	5.08795e-67	1.10957
Gm26917	7.96919e-09	0.323277	0.708	0.64	0.000141198	1.10625
Xist	1.45514e-09	0.474525	0.465	0.421	2.57822e-05	1.10451
Pbx3	3.60875e-14	0.253057	0.925	0.848	6.39399e-10	1.0908
Fam155a	1.39227e-47	0.472203	0.963	0.897	2.46683e-43	1.07358
Ntm	0.0556446	-0.292505	0.679	0.648	1	1.04784
Plcb1	0.00057198	-0.271073	0.75	0.722	1	1.03878
Adgrb3	4.17458e-32	0.261985	0.987	0.954	7.39652e-28	1.03459
Cadps2	0.00212947	-0.566368	0.475	0.461	1	1.03037
Kirrel3	0.411592	-0.522723	0.137	0.133	1	1.03007
Thsd7a	0.000231697	-0.321157	0.852	0.836	1	1.01914
Ctnna2	1.76767e-16	-0.295779	0.913	0.897	3.13196e-12	1.01784
Syne1	0.979172	-0.269772	0.237	0.233	1	1.01717
Erbb4	6.42556e-41	-0.639284	0.936	0.922	1.13848e-36	1.01518
Lsamp	8.91546e-13	-0.400219	0.947	0.934	1.57964e-08	1.01392
Dcc	6.37642e-11	-0.254043	1	0.988	1.12977e-06	1.01215
Nrxn1	1.97667e-14	-0.312885	0.936	0.928	3.50227e-10	1.00862
Cacna2d1	1.82486e-51	-0.395096	0.99	0.991	3.23328e-47	0.998991
Kcnb2	1.42045e-16	-0.435937	0.802	0.805	2.51675e-12	0.996273
Celf2	2.31702e-68	-0.558064	0.973	0.977	4.1053e-64	0.995906
Grik2	2.86356e-25	-0.411174	0.957	0.962	5.07366e-21	0.994802
Frmd4a	6.39416e-11	-0.256234	0.84	0.846	1.13292e-06	0.992908
Astn2	7.82583e-29	-0.470341	0.888	0.898	1.38658e-24	0.988864
Nav2	3.35874e-70	-0.579781	0.952	0.964	5.95102e-66	0.987552
Pde1c	3.29897e-28	-0.494751	0.87	0.882	5.84511e-24	0.986394
Ccser1	1.23564e-27	-0.465627	0.879	0.892	2.18931e-23	0.985426
Pde4d	7.89745e-47	-0.731497	0.881	0.895	1.39927e-42	0.984357
Gria4	3.67439e-41	-0.563895	0.846	0.864	6.51028e-37	0.979167
Nav1	9.02941e-15	-0.312795	0.85	0.869	1.59983e-10	0.978136
Chd7	7.29249e-67	-0.377426	0.943	0.968	1.29208e-62	0.974173
Zmiz1	3.9872e-07	-0.286875	0.833	0.856	0.00706453	0.973131
Nbea	1.4369e-14	-0.294624	0.829	0.854	2.5459e-10	0.970726
Ank3	3.42826e-72	-0.586384	0.922	0.952	6.07419e-68	0.968487
Ank2	1.18476e-53	-0.567264	0.881	0.911	2.09916e-49	0.967069
Nlgn1	2.51145e-06	-0.259426	0.83	0.859	0.0444979	0.96624
Map2	3.05706e-26	-0.421432	0.828	0.86	5.4165e-22	0.962791
Reln	4.09046e-54	-0.525001	0.879	0.913	7.24747e-50	0.96276
Zfp521	5.9049e-12	-0.527165	0.66	0.69	1.04623e-07	0.956522
Foxp1	1.75062e-12	-0.256765	0.729	0.764	3.10176e-08	0.954188
Baz2b	2.79685e-12	-0.268083	0.775	0.815	4.95546e-08	0.95092
Prkcb	8.1133e-34	-0.428881	0.808	0.85	1.43751e-29	0.950588
Jmjd1c	2.49808e-09	-0.266228	0.71	0.747	4.42609e-05	0.950468
Nol4	7.58371e-12	-0.351857	0.784	0.825	1.34368e-07	0.950303
Tmem178b	2.16693e-18	-0.309405	0.785	0.827	3.83936e-14	0.949214
Nav3	9.6551e-23	-0.450957	0.731	0.771	1.71069e-18	0.948119
Ttc3	8.72728e-21	-0.30915	0.774	0.819	1.5463e-16	0.945055
Mir99ahg	3.63164e-38	-0.4106	0.848	0.898	6.43454e-34	0.944321
Adarb2	0.00143817	-0.444435	0.58	0.615	1	0.943089
Pcdh9	0.000590793	-0.394399	0.444	0.472	1	0.940678
Rbfox3	2.07975e-55	-0.672362	0.86	0.915	3.6849e-51	0.939891
Klhl29	9.78093e-15	-0.612645	0.593	0.631	1.73298e-10	0.939778
Xkr4	1.66341e-12	-0.392321	0.643	0.686	2.94723e-08	0.937318
Kmt2e	1.44005e-08	-0.257104	0.663	0.708	0.000255149	0.936441
Cnksr2	5.10136e-09	-0.271356	0.554	0.593	9.03858e-05	0.934233
Klf12	5.47585e-39	-0.503213	0.787	0.845	9.7021e-35	0.931361
Fmnl2	9.67518e-18	-0.367663	0.691	0.744	1.71425e-13	0.928763
Arhgap21	2.67652e-10	-0.261433	0.615	0.664	4.74226e-06	0.926205
Srgap2	9.89352e-16	-0.400145	0.642	0.699	1.75293e-11	0.918455
Cep170	3.24718e-10	-0.257403	0.592	0.646	5.75335e-06	0.916409
Msi2	3.31682e-40	-0.462116	0.776	0.847	5.87675e-36	0.916175
Kcnip4	0.043899	-0.415384	0.206	0.225	1	0.915555
Zfp608	2.51769e-10	-0.266838	0.571	0.624	4.46085e-06	0.915064
Cask	2.58102e-09	-0.360506	0.58	0.635	4.57305e-05	0.913386
Kif1b	2.87244e-30	-0.420693	0.711	0.785	5.08938e-26	0.905732
Peli2	3.40322e-19	-0.388907	0.62	0.685	6.02983e-15	0.905109
Maml3	5.51171e-67	-0.647114	0.824	0.911	9.76565e-63	0.9045
Nrcam	5.65878e-12	-0.374264	0.532	0.59	1.00262e-07	0.901695
Sox5	4.17631e-14	-0.433102	0.644	0.716	7.39959e-10	0.899441
Cbfa2t2	9.98181e-06	-0.265096	0.491	0.546	0.176858	0.899267
Bicd1	7.78024e-07	-0.26494	0.512	0.571	0.013785	0.896672
Pde4b	1.94938e-05	-0.367314	0.467	0.521	0.345391	0.896353
Sobp	8.6345e-30	-0.492593	0.669	0.747	1.52986e-25	0.895582
Sptbn1	6.57324e-13	-0.347331	0.471	0.526	1.16465e-08	0.895437
Coro2b	4.96669e-11	-0.334521	0.603	0.674	8.79998e-07	0.894659
Enox1	6.21351e-45	-0.578351	0.687	0.769	1.10091e-40	0.893368
Zfpm2	4.07081e-38	-1.15872	0.64	0.718	7.21266e-34	0.891365
Mvb12b	1.5164e-08	-0.271416	0.49	0.552	0.000268675	0.887681
Ror1	0.0330398	-0.263186	0.345	0.389	1	0.886889
Itsn1	2.21689e-07	-0.280216	0.486	0.548	0.00392789	0.886861
Jarid2	5.1631e-10	-0.286964	0.562	0.635	9.14798e-06	0.885039
Sh3gl2	9.90375e-15	-0.385601	0.506	0.572	1.75475e-10	0.884615
Heg1	2.77696e-11	-0.330592	0.565	0.639	4.92022e-07	0.884194
Bcas3	3.24628e-11	-0.310181	0.516	0.584	5.75176e-07	0.883561
Edil3	8.99261e-16	-0.434377	0.595	0.674	1.59331e-11	0.882789
Plekha6	9.27714e-12	-0.312719	0.518	0.587	1.64372e-07	0.882453
Mbd5	3.77454e-11	-0.303515	0.551	0.627	6.68773e-07	0.878788
Psd3	1.71671e-12	-0.391997	0.557	0.634	3.04166e-08	0.878549
Sorbs1	8.04292e-16	-0.4923	0.535	0.61	1.42504e-11	0.877049
Fgf14	0.017081	-0.975718	0.284	0.324	1	0.876543
Basp1	2.98896e-15	-0.371376	0.523	0.601	5.29584e-11	0.870216
Apc	7.27993e-52	-0.700753	0.697	0.801	1.28986e-47	0.870162
Miat	4.83984e-37	-0.650464	0.66	0.759	8.57523e-33	0.869565
Klf7	8.45084e-08	-0.289913	0.488	0.562	0.00149732	0.868327
Slc4a4	0.00595461	-0.267672	0.125	0.144	1	0.868055
Trak1	2.54685e-05	-0.306852	0.47	0.542	0.451251	0.867159
Ptprs	1.03477e-58	-0.771773	0.708	0.817	1.83341e-54	0.866585
Hectd4	1.83611e-07	-0.296542	0.448	0.518	0.00325321	0.864865
Kif5c	1.06464e-18	-0.438332	0.598	0.692	1.88632e-14	0.864162
Srrm4	8.28696e-39	-0.526945	0.636	0.74	1.46828e-34	0.859459
Cacna1c	1.3119e-14	-0.73028	0.398	0.464	2.32442e-10	0.857758
Atf7ip	3.67036e-08	-0.283049	0.413	0.482	0.000650314	0.856846
Smpd3	3.30496e-07	-0.262605	0.352	0.411	0.00585573	0.856447
Gtdc1	4.90539e-11	-0.315763	0.482	0.563	8.69136e-07	0.856128
Nedd4l	2.61659e-73	-0.722155	0.706	0.825	4.63608e-69	0.855757
Anks1b	6.18476e-49	-0.700163	0.645	0.755	1.09581e-44	0.854305
Soga1	4.43969e-18	-0.336405	0.466	0.546	7.86625e-14	0.85348
Sox11	7.00068e-10	-0.430712	0.493	0.578	1.24038e-05	0.852941
Cntnap1	0.000185398	-0.250719	0.314	0.37	1	0.848648
Nnat	0.00386447	-0.286522	0.288	0.34	1	0.847059
Dync1i2	9.77349e-08	-0.253026	0.363	0.43	0.00173167	0.844186
Kdm1a	6.70738e-09	-0.271312	0.383	0.454	0.000118841	0.843612
Pclo	1.68114e-09	-0.417696	0.396	0.471	2.97864e-05	0.840764
Gramd1b	1.63133e-66	-0.738436	0.668	0.795	2.89039e-62	0.840251
Stox2	5.24712e-06	-0.311032	0.447	0.534	0.0929684	0.837078
Kalrn	3.26798e-14	-0.397542	0.457	0.547	5.7902e-10	0.835466
Mbnl2	1.31251e-22	-0.421369	0.476	0.57	2.32551e-18	0.835088
Scaper	9.76448e-07	-0.27226	0.335	0.402	0.0173007	0.833333
Kcnd2	0.00014336	-0.858576	0.205	0.246	1	0.833333
Ctif	1.21058e-17	-0.486903	0.502	0.603	2.14491e-13	0.832504
Zswim6	4.77911e-06	-0.290338	0.39	0.469	0.0846764	0.831556
Atp2b2	2.54531e-15	-0.35784	0.402	0.484	4.50977e-11	0.830578
Vezt	3.90407e-05	-0.251941	0.323	0.389	0.691723	0.830334
Ephb2	1.4966e-13	-0.445612	0.477	0.575	2.65168e-09	0.829565
Aff4	1.02459e-06	-0.306477	0.389	0.469	0.0181537	0.829424
Sema6d	2.44846e-09	-0.416688	0.368	0.444	4.33818e-05	0.828829
Plxna2	1.21554e-05	-0.415968	0.246	0.297	0.215369	0.828283
Nsg2	1.28594e-05	-0.256478	0.296	0.358	0.227842	0.826815
Leng8	0.0112688	-0.252899	0.304	0.368	1	0.826087
Atxn1	0.00758935	-0.26009	0.266	0.322	1	0.826087
Cald1	1.85758e-07	-0.293764	0.345	0.418	0.00329127	0.825359
Kcnj3	1.72512e-21	-0.539577	0.462	0.56	3.05656e-17	0.825
Ppp1r14c	5.19945e-11	-0.488953	0.325	0.394	9.21239e-07	0.824873
Rb1cc1	0.000427844	-0.250536	0.325	0.394	1	0.824873
Ssbp3	1.53741e-13	-0.43921	0.479	0.581	2.72398e-09	0.82444
Enox2	3.43318e-08	-0.38142	0.328	0.398	0.00060829	0.82412
Myo10	0.0334307	-0.272879	0.302	0.367	1	0.822888
Barhl1	4.84674e-08	-0.32453	0.343	0.417	0.000858745	0.822542
Cpe	3.48811e-17	-0.3119	0.389	0.474	6.18024e-13	0.820675
March1	2.35158e-21	-0.634329	0.489	0.596	4.16653e-17	0.82047
Gng2	2.10234e-10	-0.327115	0.388	0.473	3.72493e-06	0.820296
Ppm1l	1.4937e-10	-0.350881	0.39	0.476	2.64655e-06	0.819328
Slc39a11	2.25142e-07	-0.36138	0.399	0.488	0.00398907	0.817623
Zbtb18	0.00445023	-0.251749	0.264	0.323	1	0.817337
Rps6ka3	2.30904e-10	-0.382325	0.33	0.404	4.09116e-06	0.816831
Exoc6b	1.92552e-20	-0.421223	0.485	0.594	3.41163e-16	0.816498
Mgat5b	1.57619e-11	-0.270669	0.327	0.401	2.79269e-07	0.815461
Egfr	3.24777e-13	-0.50744	0.418	0.513	5.75441e-09	0.814815
Tmem2	1.16e-07	-0.376907	0.329	0.405	0.00205528	0.812345
Rab3c	1.33875e-14	-0.414891	0.427	0.527	2.37201e-10	0.810247
Senp7	1.24397e-10	-0.287629	0.345	0.426	2.20407e-06	0.809859
Rims1	7.15429e-18	-0.631217	0.419	0.518	1.2676e-13	0.80888
Gm4258	1.74264e-24	-0.592319	0.494	0.611	3.08762e-20	0.808511
Snap25	1.26145e-30	-0.49828	0.489	0.605	2.23504e-26	0.808264
Plppr1	2.9012e-36	-0.832503	0.514	0.637	5.14034e-32	0.806907
Bsn	0.000238899	-0.252416	0.259	0.321	1	0.806853
Rasgef1b	3.28252e-37	-0.753415	0.503	0.626	5.81598e-33	0.803514
Arhgef2	1.50729e-05	-0.258463	0.305	0.381	0.267062	0.800525
Ophn1	8.00719e-06	-0.26772	0.296	0.37	0.141871	0.8
Fzd3	8.18013e-06	-0.292329	0.305	0.382	0.144936	0.798429
Brsk2	1.24989e-05	-0.332546	0.306	0.384	0.221456	0.796875
Sh3kbp1	9.5192e-06	-0.305811	0.288	0.362	0.168661	0.79558
Sptan1	7.32873e-19	-0.375034	0.359	0.453	1.2985e-14	0.792494
Tll1	1.2721e-08	-0.286817	0.263	0.332	0.00022539	0.792168
Sema6a	1.55874e-57	-0.91428	0.543	0.686	2.76178e-53	0.791545
Tmeff1	6.103e-11	-0.343148	0.324	0.41	1.08133e-06	0.790244
Eml5	1.85129e-14	-0.407243	0.354	0.449	3.28011e-10	0.788419
Elavl3	8.43519e-26	-0.546071	0.496	0.63	1.49455e-21	0.787301
Clmp	1.07315e-15	-0.525032	0.391	0.497	1.9014e-11	0.78672
Astn1	5.62329e-22	-0.481677	0.417	0.531	9.96334e-18	0.785311
Tnik	4.71858e-105	-1.20039	0.606	0.773	8.36038e-101	0.783959
Ppfia2	1.24569e-42	-0.811887	0.528	0.675	2.20712e-38	0.782222
Ldlrad4	2.81171e-14	-0.41193	0.351	0.449	4.98179e-10	0.781737
Snapc3	6.20209e-09	-0.272069	0.245	0.314	0.000109889	0.780255
Bcas1	1.53484e-06	-0.312952	0.259	0.332	0.0271943	0.78012
Map1b	7.38201e-46	-0.747155	0.538	0.69	1.30794e-41	0.77971
Dixdc1	2.13246e-12	-0.279927	0.262	0.337	3.77829e-08	0.777448
Git2	8.96304e-13	-0.380281	0.334	0.43	1.58807e-08	0.776744
Zdhhc17	1.32207e-06	-0.28246	0.256	0.33	0.0234244	0.775757
St6gal1	1.02122e-07	-0.292775	0.259	0.334	0.00180939	0.775449
Bin1	2.61773e-09	-0.360249	0.306	0.396	4.63809e-05	0.772727
Srrm3	1.80909e-13	-0.368202	0.318	0.412	3.20535e-09	0.771844
Unc13a	6.58655e-08	-0.307986	0.243	0.315	0.00116701	0.771428
Ahcyl2	2.72639e-05	-0.25111	0.213	0.277	0.483061	0.768953
Trhde	2.36081e-05	-0.257295	0.116	0.151	0.418289	0.768211
Cacna1b	1.97263e-19	-0.428985	0.353	0.46	3.49511e-15	0.767391
Tmtc2	1.03468e-34	-0.849277	0.455	0.593	1.83324e-30	0.767285
Xkr7	2.5891e-08	-0.254856	0.227	0.297	0.000458737	0.76431
Syt11	9.5995e-08	-0.311443	0.259	0.339	0.00170084	0.764012
Anks1	2.80022e-07	-0.285189	0.252	0.33	0.00496144	0.763636
Tuba1a	3.29017e-12	-0.416568	0.326	0.427	5.82952e-08	0.763466
Hivep2	1.0117e-21	-0.610965	0.399	0.523	1.79253e-17	0.762906
Mapk10	5.7945e-40	-0.701191	0.494	0.65	1.02667e-35	0.76
Dmxl2	4.20679e-11	-0.39437	0.313	0.412	7.45358e-07	0.759709
Csnk1g1	2.3577e-18	-0.376801	0.335	0.442	4.17737e-14	0.757918
Obscn	2.32059e-06	-0.426487	0.178	0.235	0.0411162	0.757446
Celf4	5.79535e-52	-1.02225	0.485	0.642	1.02682e-47	0.755452
Dlg2	1.9246e-11	-0.527106	0.247	0.327	3.41001e-07	0.755351
Cadm2	2.15667e-44	-1.31482	0.415	0.55	3.82118e-40	0.754545
Kmt5b	3.71005e-13	-0.377329	0.284	0.377	6.57347e-09	0.753315
Sgip1	3.48609e-11	-0.453044	0.342	0.454	6.17666e-07	0.753304
Gpm6a	2.90083e-53	-0.850068	0.466	0.62	5.13969e-49	0.751613
Rnf150	1.52095e-20	-0.33881	0.238	0.317	2.69482e-16	0.750788
Washc2	4.33503e-06	-0.276958	0.203	0.271	0.0768081	0.749077
Zfp423	2.80788e-36	-0.704581	0.422	0.564	4.97499e-32	0.748227
Ubl3	9.78698e-07	-0.290396	0.202	0.27	0.0173406	0.748148
Elmo1	1.71044e-17	-0.700362	0.308	0.412	3.03055e-13	0.747573
Sept3	4.20308e-16	-0.445447	0.296	0.396	7.44701e-12	0.747475
Zmynd8	1.24859e-17	-0.490825	0.353	0.473	2.21225e-13	0.7463
Nckap5l	9.32232e-11	-0.295259	0.2	0.268	1.65173e-06	0.746268
Mtss1	7.32339e-44	-0.842589	0.443	0.596	1.29756e-39	0.743288
Elavl4	1.53663e-17	-0.373314	0.27	0.364	2.72261e-13	0.741758
Camk2d	2.25609e-17	-0.568076	0.298	0.402	3.99735e-13	0.741293
Mxi1	3.44691e-09	-0.378263	0.272	0.367	6.10723e-05	0.741144
Igfbpl1	3.24045e-09	-0.373767	0.254	0.343	5.74143e-05	0.740525
Msra	4.68706e-21	-0.710636	0.37	0.5	8.30453e-17	0.74
Unc79	2.07523e-23	-0.477818	0.346	0.468	3.6769e-19	0.739316
Arhgef10l	5.24475e-10	-0.369183	0.257	0.349	9.29264e-06	0.736389
Scg5	9.37088e-15	-0.395117	0.282	0.384	1.66033e-10	0.734375
Parp6	5.36631e-14	-0.262068	0.185	0.252	9.50803e-10	0.734127
Dvl3	1.71386e-07	-0.261009	0.168	0.229	0.00303661	0.733624
Rtn1	2.62728e-29	-0.590115	0.403	0.551	4.65502e-25	0.731397
Ube2h	5.72039e-20	-0.394439	0.262	0.36	1.01354e-15	0.727778
H13	2.70333e-12	-0.327131	0.219	0.301	4.78975e-08	0.727575
Ago1	1.72395e-09	-0.286761	0.185	0.255	3.0545e-05	0.72549
Apba1	1.23441e-16	-0.592153	0.309	0.426	2.18713e-12	0.725352
Ntn4	1.42337e-18	-0.452426	0.297	0.41	2.52193e-14	0.72439
Grk3	9.9789e-08	-0.327159	0.196	0.271	0.00176806	0.723247
Rsrp1	3.82503e-10	-0.276051	0.203	0.281	6.77719e-06	0.72242
Slc44a1	1.85906e-09	-0.364279	0.223	0.309	3.29389e-05	0.721683
Atp6v0a1	2.88056e-12	-0.346898	0.234	0.325	5.10378e-08	0.72
Agpat4	2.21048e-07	-0.287208	0.187	0.26	0.00391653	0.71923
Synpr	2.29565e-18	-0.632345	0.263	0.367	4.06742e-14	0.716621
Osbpl9	1.06726e-12	-0.384907	0.257	0.359	1.89097e-08	0.715877
Gm3764	1.44212e-16	-0.348596	0.226	0.316	2.55514e-12	0.71519
Stard9	4.36345e-10	-0.337554	0.213	0.298	7.73115e-06	0.714765
Cpeb4	3.45919e-06	-0.251569	0.16	0.224	0.0612898	0.714285
Kcnc3	2.38531e-08	-0.32967	0.212	0.297	0.000422628	0.713804
Tenm1	3.75713e-06	-0.505185	0.163	0.229	0.0665688	0.71179
Syngap1	9.22645e-09	-0.263897	0.158	0.222	0.000163474	0.711711
Gm37013	9.365e-09	-0.257553	0.143	0.201	0.000165929	0.711442
Kif1a	2.79019e-14	-0.43008	0.272	0.385	4.94367e-10	0.706493
Crebrf	1.56607e-09	-0.327062	0.197	0.279	2.77475e-05	0.706093
Klhl24	4.57796e-13	-0.336342	0.204	0.289	8.11123e-09	0.705882
Rapgef4	6.01811e-07	-0.255805	0.11	0.156	0.0106629	0.705128
Pak7	3.01601e-83	-0.908911	0.475	0.675	5.34377e-79	0.703704
Afap1	1.59482e-27	-0.560175	0.324	0.461	2.8257e-23	0.70282
Opcml	2.41181e-32	-1.12784	0.326	0.464	4.27324e-28	0.702586
Wnk2	2.17149e-13	-0.453608	0.274	0.39	3.84744e-09	0.702564
Tmsb4x	1.54605e-07	-0.257546	0.141	0.201	0.0027393	0.701492
Podxl2	8.81301e-12	-0.358573	0.195	0.278	1.56149e-07	0.701439
Sox4	1.05138e-09	-0.282351	0.16	0.229	1.86283e-05	0.69869
Fam117b	1.31764e-11	-0.263892	0.156	0.224	2.3346e-07	0.696428
Schip1	9.44634e-13	-0.433961	0.215	0.309	1.6737e-08	0.695793
Park2	2.35811e-12	-0.496203	0.258	0.371	4.1781e-08	0.695418
Xkr6	3.94027e-34	-0.623253	0.317	0.459	6.98137e-30	0.690632
Fnbp1	1.48951e-12	-0.442984	0.21	0.305	2.63911e-08	0.688524
Tmem63b	5.13736e-11	-0.396582	0.223	0.324	9.10237e-07	0.688271
Tsga10	2.59107e-12	-0.284094	0.15	0.218	4.59085e-08	0.688073
St18	8.6229e-42	-0.771981	0.359	0.522	1.52781e-37	0.687739
Zfhx2os	8.20597e-13	-0.387184	0.207	0.301	1.45393e-08	0.687707
Myt1l	7.50492e-30	-0.694545	0.319	0.464	1.32972e-25	0.6875
Clip2	9.99663e-14	-0.318209	0.187	0.272	1.7712e-09	0.6875
Efr3b	1.20644e-12	-0.342396	0.181	0.264	2.13758e-08	0.685606
Fam107b	1.1684e-12	-0.326644	0.166	0.243	2.07017e-08	0.683127
Gm26953	1.32464e-09	-0.280995	0.146	0.214	2.347e-05	0.682243
Dscaml1	5.65413e-62	-0.944647	0.403	0.591	1.0018e-57	0.681895
Mcf2l	1.23416e-07	-0.270568	0.15	0.22	0.00218668	0.681818
Stxbp5l	2.56387e-32	-0.878208	0.353	0.518	4.54266e-28	0.681467
Dner	1.39552e-33	-0.664948	0.314	0.462	2.47258e-29	0.679654
Pgm2l1	0.000180762	-0.258714	0.124	0.183	1	0.677595
Crtc3	7.47405e-12	-0.325705	0.167	0.247	1.32425e-07	0.676113
Ttbk1	6.03729e-09	-0.281061	0.136	0.202	0.000106969	0.673267
Itm2b	5.25752e-06	-0.262683	0.127	0.189	0.0931527	0.671957
Rmst	1.04519e-16	-0.460759	0.19	0.283	1.85186e-12	0.671378
Rab30	2.5053e-12	-0.410711	0.202	0.301	4.43889e-08	0.671096
Pdcd4	1.72837e-12	-0.396105	0.2	0.3	3.06233e-08	0.666666
Tcte2	3.11285e-07	-0.362634	0.156	0.234	0.00551535	0.666666
Trpc4ap	1.30491e-12	-0.319575	0.159	0.239	2.31203e-08	0.665272
Luzp2	3.65443e-09	-0.440308	0.145	0.218	6.47491e-05	0.665137
Arhgap44	7.6176e-08	-0.318006	0.152	0.229	0.00134969	0.663755
Atl1	2.44028e-09	-0.302007	0.142	0.214	4.32368e-05	0.663551
Slc17a6	7.349e-26	-0.606401	0.286	0.432	1.3021e-21	0.662037
Ralgds	9.40037e-09	-0.302186	0.136	0.206	0.000166556	0.660194
Gm9801	3.44081e-21	-0.469137	0.223	0.338	6.09643e-17	0.659763
Clvs1	3.02579e-46	-0.830678	0.349	0.529	5.3611e-42	0.659735
Clip3	2.93516e-07	-0.334319	0.152	0.231	0.00520051	0.658008
Pitpnc1	9.39635e-18	-0.470035	0.225	0.342	1.66485e-13	0.657895
Fam219a	1.55178e-12	-0.283776	0.125	0.19	2.74944e-08	0.657894
Dpysl5	6.23747e-15	-0.470444	0.217	0.33	1.10515e-10	0.657576
Gm20696	4.5878e-29	-0.706354	0.305	0.464	8.12866e-25	0.657327
Rundc3a	2.73636e-07	-0.292136	0.128	0.195	0.00484828	0.65641
Nova2	8.02739e-23	-0.559625	0.261	0.399	1.42229e-18	0.654135
Kcnk10	1.47481e-16	-0.319754	0.138	0.211	2.61307e-12	0.654028
Rcor2	4.98269e-12	-0.39265	0.163	0.25	8.82832e-08	0.652
Kcnq2	4.84472e-15	-0.412654	0.184	0.284	8.58388e-11	0.647887
Atat1	9.86656e-06	-0.273121	0.111	0.172	0.174816	0.645348
Tspoap1	1.29379e-09	-0.373264	0.169	0.262	2.29233e-05	0.645038
Pik3r3	8.48246e-27	-0.66888	0.295	0.46	1.50292e-22	0.641304
Mgat4c	7.17519e-23	-0.678252	0.191	0.298	1.2713e-18	0.640939
Nrn1	1.00267e-11	-0.399593	0.161	0.252	1.77652e-07	0.638889
Cacnb4	1.2255e-12	-0.477557	0.16	0.251	2.17135e-08	0.63745
Ypel2	3.02448e-11	-0.332228	0.131	0.206	5.35877e-07	0.635922
Wdr47	1.64546e-05	-0.284081	0.117	0.184	0.291542	0.635869
Kcnj6	3.86341e-67	-0.992431	0.337	0.53	6.84518e-63	0.635849
Inpp4a	3.456e-10	-0.323471	0.134	0.211	6.12334e-06	0.635071
Dcx	1.45405e-56	-0.92885	0.372	0.586	2.57628e-52	0.634812
Stxbp1	8.29388e-17	-0.519859	0.224	0.353	1.46951e-12	0.634561
Aig1	2.16992e-21	-0.452127	0.173	0.273	3.84467e-17	0.633699
L3mbtl4	1.43167e-16	-0.435848	0.134	0.212	2.53664e-12	0.632075
Rai2	1.94722e-06	-0.337566	0.13	0.206	0.0345009	0.631068
Sphkap	1.0562e-32	-0.723075	0.241	0.382	1.87138e-28	0.63089
Tacc2	6.44969e-09	-0.314427	0.135	0.214	0.000114276	0.630841
Zswim4	5.536e-07	-0.25994	0.095	0.151	0.00980869	0.629139
Glce	8.48307e-39	-0.809861	0.266	0.426	1.50303e-34	0.624413
Ankrd13a	4.25502e-12	-0.271274	0.113	0.181	7.53904e-08	0.624309
Nhlh2	2.4901e-14	-0.456621	0.174	0.279	4.41196e-10	0.623656
Taok3	9.91693e-08	-0.257244	0.096	0.154	0.00175708	0.623376
Kif3c	1.77654e-13	-0.284998	0.11	0.177	3.14767e-09	0.621469
Cyth1	7.77136e-07	-0.260237	0.108	0.174	0.0137693	0.620689
Vash1	1.60031e-13	-0.280139	0.111	0.179	2.83543e-09	0.620111
Gm20125	1.42467e-10	-0.377845	0.132	0.213	2.52422e-06	0.619718
Ankrd12	6.96868e-22	-0.493243	0.2	0.323	1.23471e-17	0.619195
Kidins220	1.39091e-32	-0.6066	0.24	0.388	2.46441e-28	0.618557
Ina	6.2014e-12	-0.337752	0.119	0.193	1.09876e-07	0.61658
Pcmtd2	7.84522e-13	-0.337553	0.122	0.198	1.39002e-08	0.616161
Lrrtm3	4.53647e-08	-0.533663	0.099	0.161	0.000803771	0.614906
Plxna3	5.67936e-13	-0.338174	0.121	0.197	1.00627e-08	0.614213
Lmtk3	1.25066e-10	-0.267449	0.1	0.163	2.21592e-06	0.613497
Mindy2	1.64492e-07	-0.255614	0.087	0.142	0.00291447	0.612676
Gap43	1.81998e-28	-0.646171	0.217	0.355	3.22463e-24	0.611267
Snhg14	1.89256e-32	-0.771914	0.248	0.406	3.35324e-28	0.610837
Gm20687	9.29922e-16	-0.390587	0.134	0.22	1.64764e-11	0.609091
Fbxl20	5.07641e-24	-0.510813	0.202	0.334	8.99438e-20	0.60479
Hip1r	4.00734e-14	-0.261066	0.091	0.151	7.10021e-10	0.602649
Ndst3	2.56523e-20	-0.739473	0.16	0.266	4.54508e-16	0.601504
Sorbs2	2.76975e-11	-0.343066	0.104	0.173	4.90743e-07	0.601156
Adcy5	7.4535e-17	-0.459278	0.155	0.258	1.32061e-12	0.600775
Dlgap4	4.2076e-20	-0.530463	0.209	0.348	7.45502e-16	0.600575
Uncx	2.67444e-14	-0.444036	0.156	0.26	4.73857e-10	0.6
Cog1	6.22167e-09	-0.275916	0.094	0.157	0.000110236	0.598726
Zfpm1	2.5539e-08	-0.250375	0.082	0.137	0.000452501	0.59854
Tenm2	2.25504e-16	-0.57118	0.147	0.246	3.99549e-12	0.597561
St8sia2	3.08151e-08	-0.273981	0.089	0.149	0.000545982	0.597315
Ptprr	2.44242e-10	-0.290341	0.071	0.119	4.32749e-06	0.596638
Chrm3	2.21245e-08	-0.47111	0.1	0.168	0.000392001	0.595238
Gm5087	2.38473e-11	-0.25225	0.075	0.126	4.22527e-07	0.595238
Pld5	8.19724e-09	-0.285007	0.072	0.121	0.000145239	0.595041
March3	3.58446e-18	-0.427708	0.122	0.206	6.35094e-14	0.592233
Cpeb3	7.64537e-16	-0.373921	0.122	0.206	1.35461e-11	0.592233
Pik3c2b	5.78686e-07	-0.258666	0.086	0.146	0.0102532	0.589041
Abhd16a	4.11955e-06	-0.254996	0.077	0.131	0.0729902	0.587786
Nmnat2	2.65394e-29	-0.554563	0.186	0.317	4.70226e-25	0.586751
Ano4	3.71524e-15	-0.494127	0.139	0.237	6.58267e-11	0.586498
Nrg1	3.73113e-74	-1.51803	0.296	0.506	6.61082e-70	0.58498
Rab6b	1.78275e-39	-0.777861	0.271	0.464	3.15868e-35	0.584052
Rps6ka2	9.39555e-15	-0.37226	0.126	0.216	1.6647e-10	0.583333
Dtna	1.87063e-14	-0.452667	0.128	0.22	3.31437e-10	0.581818
Acadsb	3.23195e-13	-0.31169	0.094	0.163	5.72636e-09	0.576687
Arpp21	7.42883e-65	-1.51548	0.253	0.441	1.31624e-60	0.573696
Kcnd3	2.20386e-07	-0.391322	0.078	0.136	0.0039048	0.573529
Lhfp	1.12907e-09	-0.369172	0.061	0.107	2.00049e-05	0.570093
Mapk4	4.21088e-19	-0.436506	0.114	0.2	7.46083e-15	0.57
Thra	5.69345e-18	-0.438014	0.133	0.234	1.00877e-13	0.568376
Fam214a	6.45347e-20	-0.43539	0.129	0.227	1.14343e-15	0.568282
Ckb	1.97364e-13	-0.409159	0.116	0.205	3.4969e-09	0.565853
Tubb2b	2.10256e-09	-0.304219	0.091	0.161	3.72531e-05	0.565217
Dbn1	1.1491e-16	-0.412621	0.125	0.222	2.03597e-12	0.563063
Hcn1	1.35654e-12	-0.465294	0.095	0.169	2.40351e-08	0.56213
Cdk5r1	4.30606e-10	-0.288929	0.083	0.148	7.62947e-06	0.56081
Brinp1	3.30624e-17	-0.551649	0.134	0.24	5.858e-13	0.558333
Nkain1	7.30163e-28	-0.552584	0.16	0.287	1.2937e-23	0.557491
Cep89	8.62334e-07	-0.288755	0.071	0.128	0.0152788	0.554687
Mturn	1.79667e-10	-0.263776	0.072	0.13	3.18334e-06	0.553846
Kdm6b	3.71683e-38	-0.637537	0.189	0.344	6.58548e-34	0.549418
Prdm8	3.78951e-17	-0.336612	0.089	0.162	6.71425e-13	0.549382
Ppp2r2b	4.46615e-26	-0.943248	0.188	0.343	7.91312e-22	0.548105
Plppr3	3.88021e-15	-0.370277	0.103	0.188	6.87495e-11	0.547872
Pcdha11	6.02958e-18	-0.477425	0.124	0.228	1.06832e-13	0.543859
Chst15	1.90423e-09	-0.251438	0.063	0.117	3.37391e-05	0.538461
Lrp1b	3.44463e-11	-0.912379	0.104	0.194	6.10319e-07	0.536082
Cyfip2	6.51631e-17	-0.424272	0.1	0.187	1.15456e-12	0.534759
Hivep3	5.45659e-59	-1.16991	0.226	0.423	9.66799e-55	0.534279
Nrep	2.84483e-24	-0.556961	0.151	0.283	5.04046e-20	0.533569
Snap91	1.92322e-18	-0.482356	0.118	0.222	3.40756e-14	0.531531
Gpr158	6.27242e-42	-0.880554	0.203	0.382	1.11135e-37	0.531413
Shf	6.56932e-09	-0.289104	0.07	0.132	0.000116395	0.530303
Adarb1	9.66521e-19	-0.423142	0.103	0.195	1.71248e-14	0.528205
Serpini1	3.08395e-08	-0.337762	0.076	0.145	0.000546415	0.524138
Camk4	4.54727e-16	-0.591866	0.087	0.166	8.05685e-12	0.524096
Fam227a	3.13919e-08	-0.275199	0.068	0.13	0.000556201	0.523077
Grin2b	7.89569e-73	-1.4177	0.242	0.468	1.39896e-68	0.517094
Pou2f2	1.63658e-16	-0.477343	0.108	0.209	2.89969e-12	0.516746
Igsf21	1.29832e-48	-0.878991	0.207	0.402	2.30037e-44	0.514925
Nrxn2	1.20883e-27	-0.612299	0.144	0.282	2.1418e-23	0.510638
Lingo1	7.52452e-23	-0.401709	0.085	0.167	1.33319e-18	0.508982
Tmem108	6.07006e-10	-0.312514	0.057	0.112	1.07549e-05	0.508928
Hmgcll1	1.2895e-07	-0.278819	0.056	0.111	0.00228474	0.504504
Epb41l4a	3.86492e-18	-0.469846	0.095	0.189	6.84786e-14	0.502645
Map6	6.47653e-19	-0.486924	0.105	0.213	1.14751e-14	0.492958
Scrt2	4.4322e-13	-0.467617	0.099	0.202	7.85298e-09	0.490099
Syn3	3.76858e-36	-0.963849	0.147	0.3	6.67717e-32	0.49
Nhlh1	1.42628e-18	-0.430891	0.088	0.18	2.52708e-14	0.488889
Kcnk1	5.68909e-13	-0.377422	0.077	0.158	1.00799e-08	0.487341
Fbxo32	7.13697e-15	-0.374024	0.075	0.154	1.26453e-10	0.487013
Dopey2	1.87334e-22	-0.502988	0.111	0.228	3.31918e-18	0.486842
Ncan	3.09332e-15	-0.433012	0.091	0.188	5.48074e-11	0.484042
Cacna1e	5.89414e-40	-1.29434	0.15	0.31	1.04432e-35	0.483871
Ppm1h	2.9176e-52	-1.04439	0.176	0.364	5.1694e-48	0.483516
Dnajc6	1.95233e-13	-0.377686	0.07	0.146	3.45914e-09	0.479452
Chd3	2.42543e-11	-0.351004	0.069	0.144	4.29738e-07	0.479166
Celf5	1.42238e-12	-0.307919	0.061	0.129	2.52018e-08	0.472868
Celf3	1.54925e-26	-0.595312	0.119	0.252	2.74497e-22	0.472222
Neurod1	1.14781e-39	-0.963376	0.167	0.354	2.03369e-35	0.471751
Atp9a	5.64558e-20	-0.426501	0.082	0.174	1.00028e-15	0.471264
Stmn4	1.48751e-15	-0.408531	0.08	0.17	2.63557e-11	0.470588
Pde9a	1.72727e-10	-0.346546	0.064	0.136	3.06037e-06	0.470588
Mapt	3.41283e-29	-0.592426	0.118	0.251	6.04686e-25	0.470119
Epb41l1	8.35632e-39	-0.884726	0.133	0.286	1.48057e-34	0.465035
Samd12	1.00514e-72	-1.54292	0.21	0.455	1.78091e-68	0.461538
Cadm3	3.48955e-52	-0.939176	0.173	0.376	6.18278e-48	0.460106
Arhgap20	3.63895e-17	-0.360948	0.061	0.133	6.4475e-13	0.458646
Sgsm1	1.10629e-21	-0.448408	0.077	0.169	1.96012e-17	0.455621
Prickle2	5.78319e-27	-0.680492	0.097	0.213	1.02467e-22	0.455399
Phactr3	1.58804e-21	-0.389852	0.063	0.139	2.81369e-17	0.453237
Unc5c	2.91074e-34	-1.31053	0.124	0.274	5.15725e-30	0.452555
Cntnap4	4.02088e-26	-0.698841	0.103	0.228	7.12419e-22	0.451754
Map3k13	2.4116e-43	-0.769784	0.14	0.31	4.27286e-39	0.451613
Kif21b	1.52155e-36	-0.658031	0.118	0.264	2.69587e-32	0.44697
Kif5a	2.21839e-36	-0.614976	0.111	0.249	3.93054e-32	0.445783
Lrp1	2.35321e-27	-0.49135	0.087	0.196	4.16942e-23	0.443877
Syp	2.86031e-21	-0.41857	0.07	0.159	5.06789e-17	0.440251
Cacna1a	4.14593e-49	-1.10911	0.141	0.321	7.34575e-45	0.439252
Calcoco1	9.54626e-17	-0.283905	0.047	0.108	1.69141e-12	0.435185
Atp8a2	1.0175e-23	-0.455787	0.07	0.161	1.80281e-19	0.434782
Abcc8	1.42141e-15	-0.30656	0.044	0.102	2.51845e-11	0.431372
Acss2	5.45203e-14	-0.329452	0.051	0.119	9.65991e-10	0.428571
Unc5d	1.25604e-31	-1.02873	0.103	0.241	2.22545e-27	0.427386
Gm31409	4.01677e-25	-0.506469	0.078	0.183	7.11691e-21	0.426229
Cntn1	4.18725e-25	-0.633005	0.075	0.178	7.41896e-21	0.421348
Lzts1	1.59454e-35	-0.708366	0.104	0.25	2.8252e-31	0.416
Myt1	7.02401e-65	-1.01547	0.16	0.388	1.24451e-60	0.412371
Car10	6.8319e-29	-1.40335	0.087	0.212	1.21048e-24	0.410377
Asic1	2.41248e-09	-0.309828	0.041	0.1	4.27444e-05	0.41
Cntn2	6.86949e-139	-1.91087	0.234	0.572	1.21714e-134	0.409091
Stmn2	1.06406e-56	-0.925385	0.139	0.341	1.88531e-52	0.407625
Dpf3	3.22949e-18	-0.449393	0.048	0.118	5.722e-14	0.406779
Ank1	5.40555e-19	-0.437256	0.055	0.136	9.57756e-15	0.404411
Tubb3	2.81498e-21	-0.379558	0.057	0.141	4.98758e-17	0.404255
Kdm7a	3.48318e-49	-0.713025	0.111	0.275	6.1715e-45	0.403636
Ksr2	7.2861e-14	-0.347854	0.044	0.11	1.29095e-09	0.4
Ntrk2	1.09222e-33	-0.775672	0.089	0.224	1.9352e-29	0.397321
Srgap3	3.50443e-94	-1.32171	0.172	0.435	6.20915e-90	0.395402
Kdm5b	2.19714e-68	-0.929107	0.141	0.36	3.8929e-64	0.391667
Nrxn3	3.58076e-57	-1.13409	0.113	0.289	6.34439e-53	0.391003
Mmp24	1.54265e-44	-0.807494	0.105	0.273	2.73327e-40	0.384615
Syt1	1.29289e-35	-0.868972	0.08	0.212	2.29075e-31	0.377358
Nfasc	3.81517e-52	-0.887545	0.107	0.288	6.75971e-48	0.371528
Lrrc4c	1.78352e-28	-0.996028	0.069	0.186	3.16005e-24	0.370968
Mir124a-1hg	3.44995e-69	-1.05494	0.133	0.361	6.11262e-65	0.368421
Sept4	1.50591e-17	-0.417414	0.048	0.132	2.66817e-13	0.363636
Tle2	7.63417e-13	-0.323747	0.036	0.1	1.35262e-08	0.36
Nyap2	1.67459e-56	-0.896408	0.101	0.285	2.96704e-52	0.354386
Chrna3	7.45586e-29	-0.490507	0.052	0.147	1.32103e-24	0.353741
Ryr2	2.49832e-36	-0.975817	0.065	0.184	4.42653e-32	0.353261
Spock1	8.41311e-25	-0.767431	0.056	0.16	1.49064e-20	0.35
Pacsin1	3.49782e-16	-0.375419	0.039	0.114	6.19744e-12	0.342105
Dpysl3	9.38982e-43	-0.69054	0.071	0.212	1.66369e-38	0.334906
Pdzrn3	8.44494e-47	-0.775862	0.073	0.226	1.49627e-42	0.323009
Cpeb2	5.55013e-18	-0.427885	0.04	0.124	9.83373e-14	0.32258
Gm13052	2.15862e-23	-0.447093	0.033	0.104	3.82465e-19	0.317307
Mast1	3.41001e-29	-0.437692	0.041	0.131	6.04186e-25	0.312977
Runx1t1	4.15498e-16	-0.493713	0.037	0.119	7.36179e-12	0.310924
Srcin1	3.40616e-35	-0.668682	0.059	0.192	6.03504e-31	0.307292
Zmat4	2.06768e-37	-0.895716	0.052	0.175	3.66351e-33	0.297143
Apc2	9.33999e-35	-0.613163	0.054	0.182	1.65486e-30	0.296703
Adamtsl3	1.78651e-56	-0.940927	0.06	0.215	3.16534e-52	0.27907
Nol4l	1.31324e-39	-0.65581	0.047	0.174	2.3268e-35	0.270115
Gabbr2	5.16656e-46	-0.871257	0.051	0.191	9.15412e-42	0.267016
Gdpd5	1.66965e-34	-0.456897	0.03	0.117	2.95829e-30	0.25641
Ephb1	8.10862e-74	-1.51332	0.071	0.281	1.43669e-69	0.252669
Gprin3	4.35661e-23	-0.420028	0.024	0.1	7.71905e-19	0.24
Gm26871	2.26448e-37	-0.657183	0.033	0.143	4.01221e-33	0.230769
March4	5.51916e-27	-0.481289	0.025	0.111	9.77885e-23	0.225225
Wscd2	3.1552e-57	-0.842423	0.043	0.196	5.59039e-53	0.219388
Grm1	1.25907e-50	-1.05638	0.03	0.164	2.23081e-46	0.182927
L1cam	6.34214e-45	-0.629614	0.018	0.132	1.1237e-40	0.136364

## Sheet: cluster 1
gene	p_val	avg_log2FC	fraction + in cluster	fraction + not in cluster	p_val_adj	ratio + in:out of cluster
Mcm2	1.51751e-05	0.307397	0.112	0.069	0.268872	1.62319
Ablim2	3.33901e-14	0.550282	0.21	0.135	5.91605e-10	1.55555
Pdzd2	6.28166e-05	0.422328	0.107	0.069	1	1.55072
Hey1	4.84971e-06	0.2868	0.1	0.065	0.0859272	1.53846
Cyp11a1	9.07545e-05	0.28893	0.102	0.067	1	1.52239
Dock6	1.79892e-07	0.357905	0.125	0.084	0.00318733	1.48809
Smoc1	2.6927e-62	1.00565	0.614	0.421	4.77093e-58	1.45843
Mcm3	7.05375e-05	0.348007	0.144	0.099	1	1.45454
Evc2	1.5118e-06	0.282364	0.1	0.069	0.026786	1.44927
Aim2	1.14764e-05	0.464028	0.186	0.129	0.203338	1.44186
Mcm6	8.2465e-05	0.502175	0.234	0.163	1	1.43558
Fgfr4	0.000744816	0.275764	0.1	0.07	1	1.42857
Adamts17	1.04745e-06	0.487536	0.187	0.131	0.0185587	1.42748
Lama1	2.20684e-06	0.348775	0.119	0.084	0.0391008	1.41666
Srebf1	7.35477e-13	0.519375	0.266	0.19	1.30312e-08	1.4
Col18a1	0.000507576	0.420976	0.162	0.117	1	1.38461
Obscn	1.28353e-14	0.51899	0.3	0.217	2.27416e-10	1.38249
Cdh4	4.09233e-64	0.980743	0.739	0.541	7.25079e-60	1.36599
Mcm5	0.000135322	0.381781	0.177	0.132	1	1.34091
Whrn	2.28316e-18	0.586839	0.406	0.303	4.0453e-14	1.33993
Eln	1.97109e-06	0.547993	0.289	0.216	0.0349237	1.33796
Gli2	4.71971e-63	0.829399	0.784	0.589	8.36239e-59	1.33107
Pde7b	1.59756e-05	0.462954	0.182	0.137	0.283055	1.32847
Fam210b	1.68299e-06	0.3791	0.172	0.13	0.0298193	1.32308
Mcm4	0.0401062	0.29208	0.141	0.107	1	1.31776
Cyyr1	0.368396	0.307253	0.1	0.077	1	1.2987
Svil	2.52595e-17	0.575262	0.36	0.278	4.47547e-13	1.29496
Cdca7	0.417395	0.25238	0.119	0.092	1	1.29348
St6galnac5	0.0263224	0.297094	0.118	0.092	1	1.28261
Vsx2	0.000233013	0.361309	0.189	0.148	1	1.27703
Pald1	0.000103256	0.418226	0.218	0.171	1	1.27485
Prmt8	1.48117e-34	0.71594	0.596	0.468	2.62433e-30	1.2735
Hells	6.51636e-07	0.475767	0.28	0.22	0.0115457	1.27273
Ntng2	0.000171195	0.383418	0.184	0.146	1	1.26027
Slc29a1	1.65454e-26	0.611596	0.48	0.384	2.93152e-22	1.25
Btbd11	3.93661e-46	0.632193	0.809	0.653	6.97488e-42	1.2389
Zbtb16	0.109867	0.279489	0.12	0.097	1	1.23711
Dtx1	0.0216522	0.309167	0.183	0.148	1	1.23649
Rftn1	1.42918e-30	0.627153	0.623	0.504	2.53222e-26	1.23611
Prkag2	2.82763e-06	0.484556	0.311	0.252	0.0500999	1.23413
Gnl3	0.0001916	0.417272	0.29	0.236	1	1.22881
Plekho2	0.000180222	0.29494	0.156	0.127	1	1.22835
Boc	1.52824e-43	0.655845	0.803	0.654	2.70774e-39	1.22783
Fgd3	0.000146061	0.251514	0.135	0.11	1	1.22727
Tmem163	1.85478e-56	0.847434	0.779	0.635	3.2863e-52	1.22677
Ust	2.92744e-27	0.617759	0.593	0.484	5.18684e-23	1.22521
Dtl	2.36641e-07	0.414157	0.311	0.254	0.00419281	1.22441
Dock1	3.38159e-44	0.587125	0.764	0.624	5.99151e-40	1.22436
Epb41l4b	0.0350833	0.394451	0.237	0.194	1	1.22165
Cux2	2.31469e-11	0.532103	0.389	0.32	4.10117e-07	1.21562
Sema7a	1.49214e-29	0.610882	0.621	0.511	2.64377e-25	1.21526
Itpr2	0.00476183	0.283245	0.147	0.121	1	1.21488
Rnf220	9.65413e-86	0.918934	0.844	0.696	1.71052e-81	1.21264
Tnfaip8	4.489e-08	0.477245	0.327	0.271	0.00079536	1.20664
Ece1	0.0073262	0.317979	0.175	0.146	1	1.19863
Tbata	2.98979e-05	0.390787	0.236	0.197	0.529731	1.19797
Ccbe1	3.21771e-09	0.581996	0.383	0.32	5.70114e-05	1.19687
Thsd4	4.43848e-08	0.497083	0.28	0.234	0.00078641	1.19658
Grin3a	0.00026603	0.401957	0.264	0.221	1	1.19457
Cbfa2t3	1.33056e-32	0.633706	0.708	0.595	2.35749e-28	1.18992
Camk1d	0.000489691	0.398247	0.233	0.196	1	1.18877
Gsg1l	8.23276e-34	0.428965	0.856	0.722	1.45868e-29	1.1856
Nr3c2	1.0278e-08	0.529181	0.43	0.363	0.000182105	1.18457
Ccnd1	2.80029e-10	0.458833	0.429	0.364	4.96156e-06	1.17857
Hpca	0.000121505	0.364863	0.252	0.214	1	1.17757
Timeless	0.0330747	0.294392	0.162	0.138	1	1.17391
Ntrk3	4.37554e-88	0.629667	0.95	0.81	7.75259e-84	1.17284
Draxin	1.95905e-29	0.47927	0.715	0.61	3.47105e-25	1.17213
Utp20	0.000947118	0.294817	0.205	0.175	1	1.17143
Uhrf1	0.043554	0.260206	0.144	0.123	1	1.17073
Adk	1.62997e-11	0.480381	0.53	0.454	2.88798e-07	1.1674
Pvt1	5.4851e-06	0.436788	0.391	0.335	0.097185	1.16716
Kcnh5	0.00100043	0.42812	0.336	0.288	1	1.16667
Islr2	0.00025468	0.324524	0.219	0.188	1	1.16489
Abcc1	2.33574e-05	0.328869	0.248	0.213	0.413846	1.16432
C1ql1	1.86935e-05	0.285986	0.213	0.183	0.331212	1.16393
Gm13483	0.385665	0.280873	0.136	0.117	1	1.16239
Pcgf5	0.0184304	0.296569	0.179	0.154	1	1.16234
Smad3	7.30668e-05	0.379912	0.28	0.241	1	1.16183
Pitpnm2	1.23438e-06	0.433276	0.345	0.297	0.0218707	1.16162
Grid2ip	7.65147e-06	0.420608	0.292	0.252	0.135569	1.15873
Npm1	2.61628e-06	0.405229	0.307	0.265	0.0463552	1.15849
Lima1	0.00669051	0.292178	0.178	0.154	1	1.15584
Tspan18	8.60445e-06	0.343995	0.239	0.207	0.152454	1.15459
Lrp5	0.000929419	0.303442	0.217	0.188	1	1.15425
Ccdc88c	7.096e-06	0.377587	0.318	0.278	0.125727	1.14388
Baz1a	1.59722e-05	0.36385	0.342	0.299	0.282995	1.14381
Mycn	0.000224247	0.337976	0.248	0.217	1	1.14286
Sdk1	1.82532e-29	0.635846	0.771	0.678	3.23411e-25	1.13717
Sfrp1	5.64622e-12	0.475019	0.55	0.484	1.0004e-07	1.13636
Lrfn2	0.0149358	0.283573	0.126	0.111	1	1.13513
Gli1	0.00172849	0.330067	0.304	0.268	1	1.13433
Ncor2	2.02039e-55	0.506739	0.902	0.796	3.57973e-51	1.13317
Cacng2	4.45867e-39	0.590256	0.742	0.655	7.89987e-35	1.13282
Tgfb2	1.46598e-05	0.453484	0.372	0.329	0.259742	1.1307
Tead2	0.00751817	0.325748	0.261	0.231	1	1.12987
Rpa1	0.194628	0.257955	0.174	0.154	1	1.12987
Ptch1	1.10012e-44	0.468559	0.917	0.812	1.94919e-40	1.12931
Nek7	1.15908e-05	0.372898	0.341	0.303	0.205365	1.12541
Mthfd1	0.0343844	0.269524	0.189	0.168	1	1.125
Shc2	0.0361366	0.253224	0.167	0.149	1	1.1208
Rnd3	1.22409e-08	0.407037	0.437	0.39	0.000216884	1.12051
Ccnd2	7.90299e-16	0.483316	0.543	0.485	1.40025e-11	1.11959
Lig1	0.320159	0.320858	0.244	0.218	1	1.11927
Cadm1	1.81314e-39	0.416177	0.917	0.82	3.21252e-35	1.11829
Bcar3	0.0727353	0.309218	0.186	0.167	1	1.11377
Adamts14	0.000162256	0.305122	0.299	0.269	1	1.11152
Tshz3	0.00569474	0.394444	0.339	0.306	1	1.10784
Zdhhc14	0.00817159	0.423838	0.351	0.317	1	1.10726
Cdk6	1.99977e-34	0.435546	0.887	0.802	3.54319e-30	1.10598
Unc80	0.138994	0.276943	0.212	0.192	1	1.10417
Gpr153	0.0159049	0.32033	0.277	0.251	1	1.10359
Lrig3	2.93212e-06	0.33736	0.551	0.5	0.0519513	1.102
Ssbp2	7.65134e-17	0.411622	0.616	0.559	1.35566e-12	1.10197
Angptl2	0.0381395	0.25327	0.197	0.179	1	1.10056
Cdh20	1.62081e-37	0.426598	0.98	0.892	2.87175e-33	1.09865
Ntn1	5.17583e-16	0.413835	0.748	0.681	9.17054e-12	1.09838
Tmtc1	0.00134566	0.329643	0.327	0.298	1	1.09732
Pard3b	2.36175e-10	0.334385	0.595	0.544	4.18456e-06	1.09375
Pola1	2.20248e-06	0.364083	0.565	0.517	0.0390235	1.09284
Rpsa	0.00192746	0.261345	0.212	0.195	1	1.08718
St3gal4	0.00660989	0.255338	0.214	0.197	1	1.08629
Ipo5	0.0826509	0.275789	0.227	0.209	1	1.08612
Alcam	1.01428e-07	0.377061	0.532	0.49	0.0017971	1.08571
Ulk4	0.169572	0.277449	0.241	0.222	1	1.08559
Man1c1	5.51576e-34	0.463968	0.839	0.773	9.77283e-30	1.08538
Rftn2	0.00311951	0.331618	0.308	0.284	1	1.08451
Mdga1	1.96577e-18	0.404719	0.735	0.678	3.48295e-14	1.08407
Gse1	1.00428e-76	0.646871	0.916	0.845	1.77938e-72	1.08402
Smco4	0.479748	0.25385	0.182	0.168	1	1.08333
Nxpe4	0.000137664	0.375621	0.38	0.351	1	1.08262
Barhl1	1.65917e-07	0.328917	0.435	0.402	0.00293972	1.08209
Grik4	0.00202662	0.275769	0.198	0.183	1	1.08197
Eef1a1	1.05927e-06	0.32173	0.391	0.362	0.0187682	1.08011
Mcm7	0.0410517	0.280578	0.23	0.213	1	1.07981
Eya4	0.000187956	0.313425	0.396	0.367	1	1.07902
Rcc2	0.617596	0.252923	0.2	0.186	1	1.07527
Atm	0.00176448	0.310442	0.359	0.334	1	1.07485
Scd2	0.0172664	0.292524	0.276	0.257	1	1.07393
Tshz2	1.06331e-16	0.392463	0.822	0.766	1.88398e-12	1.07311
Nkd1	1.9448e-06	0.338508	0.427	0.398	0.034458	1.07286
Crmp1	2.46009e-09	0.393488	0.496	0.464	4.35878e-05	1.06897
Tbc1d16	1.64931e-11	0.41865	0.56	0.524	2.92225e-07	1.0687
Tom1l1	0.175035	0.285629	0.237	0.222	1	1.06757
Pabpc1	0.0014159	0.304774	0.304	0.285	1	1.06667
Irs1	1.14434e-10	0.30205	0.553	0.52	2.02754e-06	1.06346
Rpl4	0.00773975	0.300425	0.305	0.287	1	1.06272
Foxp2	7.92718e-16	0.341021	0.885	0.833	1.40454e-11	1.06242
Igdcc4	0.00181528	0.314815	0.437	0.412	1	1.06068
Tmem131	6.51282e-09	0.378725	0.619	0.585	0.000115394	1.05812
Cntnap1	0.0035201	0.307851	0.379	0.359	1	1.05571
Cyp7b1	0.0930459	0.293499	0.268	0.254	1	1.05512
Sorcs2	0.000620104	0.282075	0.312	0.296	1	1.05405
Sipa1l3	1.46887e-22	0.411917	0.725	0.689	2.60255e-18	1.05225
Mb21d2	0.106758	0.295213	0.263	0.25	1	1.052
Asap1	2.99895e-06	0.284851	0.616	0.586	0.0531355	1.05119
Med12l	8.68009e-05	0.306123	0.514	0.489	1	1.05112
Ror2	0.00637816	0.280646	0.292	0.278	1	1.05036
Ccm2	0.0100844	0.270418	0.188	0.179	1	1.05028
Rpl13a	0.0380318	0.25996	0.231	0.22	1	1.05
Mgll	0.135421	0.298397	0.21	0.2	1	1.05
Grb10	0.314973	0.250886	0.212	0.202	1	1.0495
Dnmt3a	0.899057	0.254996	0.281	0.268	1	1.04851
Sacs	1.05214e-06	0.364063	0.521	0.497	0.0186418	1.04829
Usp37	0.0215102	0.285815	0.306	0.292	1	1.04794
Rai1	1.06388e-05	0.352461	0.689	0.658	0.188498	1.04711
Rbms3	0.00194385	0.320198	0.378	0.362	1	1.0442
Prim2	0.18786	0.307294	0.331	0.317	1	1.04416
Ivns1abp	0.00532577	0.318727	0.475	0.455	1	1.04396
Mir9-3hg	0.000215677	0.319562	0.477	0.457	1	1.04376
Kcnh7	1.01818e-22	0.387029	0.844	0.809	1.804e-18	1.04326
Rassf3	2.42757e-07	0.305296	0.583	0.559	0.00430117	1.04293
Pard3	3.58275e-08	0.26968	0.706	0.677	0.000634792	1.04284
Tpcn1	0.00292835	0.311378	0.422	0.405	1	1.04198
Hsp90ab1	4.09258e-16	0.359463	0.67	0.644	7.25123e-12	1.04037
Osbp2	0.000146033	0.35976	0.442	0.425	1	1.04
Ptprg	1.97418e-18	0.317026	0.862	0.829	3.49784e-14	1.03981
Cdkal1	6.27024e-09	0.325318	0.638	0.614	0.000111096	1.03909
Gas5	0.00307389	0.259065	0.269	0.259	1	1.03861
Pex5l	0.0325602	0.282656	0.281	0.271	1	1.0369
Mms22l	0.187178	0.295038	0.31	0.299	1	1.03679
Ppp2r2c	5.09281e-16	0.320655	0.681	0.658	9.02344e-12	1.03495
Rai14	0.000678035	0.279269	0.337	0.326	1	1.03374
Gtf3c1	2.14413e-05	0.316214	0.438	0.424	0.379896	1.03302
Nap1l1	0.0245275	0.291748	0.365	0.354	1	1.03107
Exoc2	7.36141e-06	0.326619	0.499	0.484	0.130429	1.03099
Phf21b	0.000999421	0.314554	0.438	0.425	1	1.03059
Wasf3	0.00517439	0.325139	0.374	0.363	1	1.0303
Zeb1	3.23555e-34	0.314835	0.974	0.946	5.73274e-30	1.0296
Neo1	6.01e-09	0.319614	0.666	0.647	0.000106485	1.02937
Rassf4	3.52593e-05	0.286647	0.47	0.458	0.624724	1.0262
Mdn1	0.010108	0.27044	0.417	0.407	1	1.02457
Bcl7a	5.44519e-05	0.295668	0.419	0.409	0.964779	1.02445
Cecr2	2.95469e-11	0.309324	0.718	0.702	5.23511e-07	1.02279
Mvb12b	8.19399e-06	0.313767	0.553	0.541	0.145181	1.02218
Etv6	0.000134808	0.276252	0.384	0.376	1	1.02128
Disp3	0.372115	0.251962	0.289	0.283	1	1.0212
Znrf3	0.0212598	0.276184	0.442	0.433	1	1.02078
Gm47283	0.000650216	0.26749	0.548	0.537	1	1.02048
Ncl	0.0170514	0.269636	0.568	0.558	1	1.01792
Nedd4	7.35537e-11	0.261928	0.815	0.803	1.30322e-06	1.01494
Dync2h1	3.02346e-05	0.278115	0.487	0.481	0.535697	1.01247
Dcc	1.25903e-56	0.393282	0.999	0.989	2.23075e-52	1.01011
Smyd3	4.04536e-06	0.303488	0.532	0.527	0.0716757	1.00949
Serbp1	0.0204408	0.257049	0.454	0.45	1	1.00889
Peak1	0.00418944	0.256855	0.366	0.363	1	1.00826
Bahcc1	0.00021597	0.253914	0.525	0.521	1	1.00768
Spats2	0.237298	0.2966	0.336	0.334	1	1.00599
Eif3a	0.0207178	0.256843	0.506	0.504	1	1.00397
Nav2	4.1295e-16	-0.298245	0.964	0.962	7.31664e-12	1.00208
Malat1	2.75889e-82	-0.412633	0.999	1	4.8882e-78	0.999
Wwox	0.00183861	0.255155	0.633	0.637	1	0.99372
H2afy	0.053908	0.256738	0.367	0.37	1	0.991892
Cxxc5	0.00943692	0.252605	0.322	0.327	1	0.984709
Grik2	1.55469e-21	-0.368876	0.944	0.963	2.7546e-17	0.98027
Auts2	1.1545e-48	-0.383577	0.957	0.98	2.04554e-44	0.976531
Celf2	1.21052e-46	-0.531461	0.954	0.979	2.1448e-42	0.974464
Ank2	2.70041e-24	-0.452301	0.854	0.913	4.78458e-20	0.935378
Lsamp	3.07095e-52	-0.649077	0.882	0.943	5.4411e-48	0.935313
Pde4d	1.81606e-42	-0.677719	0.836	0.9	3.21769e-38	0.928889
Astn2	1.38132e-37	-0.498034	0.838	0.905	2.44742e-33	0.925967
Nrxn1	6.0895e-70	-0.69151	0.86	0.938	1.07894e-65	0.916844
Thsd7a	8.88304e-13	-0.397769	0.77	0.847	1.5739e-08	0.909091
Ptprs	3.82745e-07	-0.304437	0.735	0.81	0.00678148	0.907407
Erbb4	2.78737e-71	-0.888867	0.846	0.935	4.93866e-67	0.904813
Ctnna2	1.10798e-39	-0.57286	0.82	0.91	1.96312e-35	0.901099
Cadps	1.0324e-13	-0.295426	0.749	0.838	1.82921e-09	0.893795
Ccser1	7.49401e-39	-0.535967	0.801	0.901	1.32779e-34	0.889012
Gria4	9.15669e-41	-0.633821	0.774	0.873	1.62238e-36	0.886598
Nbea	9.15618e-10	-0.284854	0.762	0.862	1.62229e-05	0.883991
Map2	1.06667e-21	-0.40396	0.765	0.867	1.88992e-17	0.882353
Kcnb2	2.8012e-27	-0.518593	0.72	0.816	4.96316e-23	0.882353
Enox1	1.27251e-19	-0.368419	0.668	0.769	2.25463e-15	0.86866
Rbfox1	1.85166e-47	-0.719004	0.737	0.854	3.28077e-43	0.862998
Apc	7.76332e-18	-0.36971	0.688	0.798	1.37551e-13	0.862155
Anks1b	1.87582e-14	-0.353899	0.645	0.75	3.32359e-10	0.86
Jmjd1c	2.06459e-10	-0.26334	0.629	0.756	3.65804e-06	0.83201
Pak7	1.53353e-07	-0.325935	0.543	0.658	0.00271712	0.825228
Cntnap2	2.15199e-10	-0.279087	0.513	0.624	3.81289e-06	0.822115
Mapk10	2.69938e-07	-0.268832	0.522	0.64	0.00478276	0.815625
Dlgap1	2.755e-12	-0.255579	0.498	0.612	4.8813e-08	0.813725
Dach1	4.98336e-11	-0.321299	0.594	0.731	8.82952e-07	0.812585
Edil3	2.73424e-15	-0.347395	0.55	0.677	4.84452e-11	0.812408
Negr1	1.73636e-07	-0.303665	0.547	0.675	0.00307649	0.81037
Cacna2d3	3.9615e-05	-0.280109	0.322	0.404	0.701899	0.79703
Arhgap21	1.27004e-09	-0.251894	0.536	0.673	2.25026e-05	0.796434
Sh3gl2	2.12139e-07	-0.282135	0.457	0.576	0.00375868	0.793403
Pdlim3	9.76663e-05	-0.303261	0.302	0.383	1	0.788512
Ctif	5.89386e-09	-0.25325	0.475	0.603	0.000104427	0.787728
Map1b	5.07827e-19	-0.480767	0.538	0.684	8.99769e-15	0.78655
Dscaml1	1.13491e-14	-0.426823	0.453	0.577	2.01083e-10	0.785095
Msra	6.17e-09	-0.330894	0.387	0.493	0.00010932	0.78499
Kcnj6	7.99232e-10	-0.41272	0.403	0.514	1.41608e-05	0.784047
Nedd4l	1.04009e-51	-0.652347	0.649	0.828	1.84284e-47	0.783816
Dcx	1.35067e-08	-0.357494	0.442	0.568	0.000239312	0.778169
Cask	1.90591e-15	-0.348605	0.499	0.643	3.37689e-11	0.77605
Fgf13	5.39437e-19	-0.468911	0.47	0.611	9.55774e-15	0.769231
Xkr4	5.42885e-32	-0.61975	0.536	0.699	9.61883e-28	0.76681
Cnksr2	1.07023e-10	-0.31437	0.463	0.604	1.89623e-06	0.766556
Zfp521	7.05321e-27	-0.720269	0.54	0.705	1.24969e-22	0.765957
Psd3	3.30224e-12	-0.339443	0.489	0.64	5.85091e-08	0.764062
Afdn	1.87222e-09	-0.273994	0.461	0.606	3.3172e-05	0.760726
Sorbs1	8.36186e-23	-0.474766	0.468	0.616	1.48155e-18	0.75974
Zfpm2	4.69477e-41	-1.18476	0.552	0.727	8.31819e-37	0.759285
Il1rapl1	1.8841e-12	-0.254968	0.357	0.471	3.33825e-08	0.757962
Adgrl3	1.35595e-12	-0.418494	0.513	0.677	2.40248e-08	0.757755
Ralgps2	3.92735e-13	-0.257264	0.397	0.525	6.95848e-09	0.75619
Nav3	3.73677e-45	-0.754339	0.595	0.788	6.62081e-41	0.755076
Phf20l1	1.7229e-15	-0.320726	0.438	0.581	3.05264e-11	0.753873
Scmh1	1.4533e-20	-0.32843	0.455	0.606	2.57496e-16	0.750825
Zfp423	2.29324e-13	-0.392078	0.418	0.559	4.06317e-09	0.747764
Macrod2	6.87599e-36	-0.522411	0.545	0.732	1.21829e-31	0.744535
Pde4b	4.39441e-14	-0.408241	0.393	0.528	7.78601e-10	0.744318
Tnik	2.08821e-59	-0.959982	0.573	0.77	3.69989e-55	0.744156
Srgap2	1.49421e-34	-0.518718	0.528	0.711	2.64744e-30	0.742616
Fat3	5.43265e-15	-0.327382	0.299	0.405	9.62557e-11	0.738271
Ralyl	8.75527e-08	-0.299096	0.244	0.333	0.00155126	0.732733
Clvs1	1.71394e-13	-0.420356	0.379	0.518	3.03677e-09	0.73166
Zfp608	7.88866e-18	-0.394524	0.465	0.636	1.39771e-13	0.731132
Plcb1	2.83166e-48	-0.804672	0.548	0.75	5.01714e-44	0.730667
Tnrc6c	9.95855e-12	-0.264666	0.369	0.509	1.76446e-07	0.724951
Nova1	3.04487e-09	-0.330015	0.387	0.537	5.3949e-05	0.72067
Otud7a	2.58188e-08	-0.295401	0.299	0.416	0.000457457	0.71875
Arhgef7	8.84831e-13	-0.256854	0.316	0.44	1.56774e-08	0.718182
Klhl29	6.79075e-37	-0.867092	0.463	0.646	1.20319e-32	0.716718
Gm4258	1.44829e-18	-0.489251	0.44	0.614	2.56608e-14	0.716612
Rtn1	2.04088e-15	-0.342758	0.39	0.547	3.61604e-11	0.71298
Pik3r3	1.64479e-09	-0.300487	0.319	0.45	2.91424e-05	0.708889
Kcnip4	5.17854e-06	-0.441644	0.163	0.23	0.0917533	0.708695
Afap1	8.17018e-15	-0.309536	0.323	0.456	1.44759e-10	0.708333
Adarb2	1.41267e-36	-0.728061	0.446	0.631	2.50297e-32	0.706814
Plppr1	1.03611e-36	-0.842465	0.451	0.64	1.83577e-32	0.704687
Enox2	2.05602e-17	-0.356032	0.282	0.401	3.64285e-13	0.703242
Gab1	5.8198e-16	-0.265888	0.292	0.416	1.03115e-11	0.701923
Amph	9.49997e-16	-0.266555	0.339	0.483	1.68321e-11	0.701863
Gm20696	1.8574e-17	-0.396884	0.319	0.456	3.29093e-13	0.699561
Pcdh9	7.27681e-19	-0.697907	0.339	0.485	1.28931e-14	0.698969
Ror1	2.10979e-09	-0.33232	0.277	0.397	3.73812e-05	0.697733
Clmp	1.71603e-14	-0.371758	0.348	0.499	3.04047e-10	0.697395
Ppfia2	1.8604e-38	-0.707839	0.472	0.677	3.29626e-34	0.697193
Sptan1	1.92052e-10	-0.295755	0.317	0.455	3.40278e-06	0.696703
Kcnq3	2.35598e-13	-0.26759	0.284	0.408	4.17433e-09	0.696078
Lmnb1	6.82524e-14	-0.265155	0.279	0.402	1.2093e-09	0.69403
Gtdc1	2.85128e-18	-0.355698	0.396	0.571	5.05189e-14	0.69352
Sgcd	5.97676e-15	-0.518553	0.299	0.432	1.05896e-10	0.692129
Kcnj3	7.97008e-29	-0.564849	0.391	0.566	1.41214e-24	0.690813
Atxn1	2.43167e-12	-0.258812	0.224	0.325	4.30843e-08	0.689231
Sept3	3.44373e-13	-0.333377	0.272	0.395	6.1016e-09	0.688607
Mdga2	4.28158e-12	-0.361796	0.232	0.337	7.5861e-08	0.688427
Scaper	5.833e-16	-0.26352	0.28	0.407	1.03349e-11	0.687961
Nrcam	1.49602e-37	-0.599971	0.414	0.603	2.65066e-33	0.686567
Mpped2	8.25662e-21	-0.255377	0.289	0.421	1.46291e-16	0.686461
Zfp385b	6.06297e-36	-0.615268	0.371	0.541	1.07424e-31	0.685767
Pclo	9.52079e-20	-0.418321	0.327	0.477	1.68689e-15	0.685534
Cntrl	1.0205e-10	-0.270518	0.218	0.319	1.80812e-06	0.683385
Gpr137c	1.42924e-14	-0.27836	0.267	0.392	2.53233e-10	0.681122
Mtss1	1.41459e-26	-0.711967	0.404	0.595	2.50637e-22	0.678991
Cdk5rap2	1.51125e-31	-0.436602	0.344	0.51	2.67764e-27	0.67451
Celf4	2.34654e-56	-1.03474	0.433	0.642	4.1576e-52	0.674455
Pkp4	8.25615e-17	-0.418887	0.301	0.447	1.46282e-12	0.673378
Sema6a	1.10761e-52	-0.906605	0.465	0.691	1.96245e-48	0.672938
Prkce	2.43166e-19	-0.445907	0.314	0.469	4.30842e-15	0.669509
Stxbp1	7.4049e-19	-0.297913	0.232	0.347	1.312e-14	0.668588
Rps6ka3	7.13081e-23	-0.40369	0.272	0.408	1.26344e-18	0.666667
Trpm3	4.73833e-06	-0.406167	0.144	0.216	0.0839538	0.666666
Ankrd44	2.65716e-17	-0.348421	0.291	0.437	4.70795e-13	0.665904
Pax6	3.48711e-22	-0.37854	0.327	0.492	6.17846e-18	0.664634
Cep128	2.26189e-21	-0.299572	0.264	0.398	4.00763e-17	0.663316
Myt1l	7.22405e-18	-0.547294	0.305	0.46	1.27996e-13	0.663043
Osbpl9	7.45173e-10	-0.271283	0.237	0.358	1.3203e-05	0.662011
Gpm6a	3.16656e-42	-0.763458	0.411	0.622	5.61052e-38	0.660772
Rgs7	1.55115e-07	-0.254535	0.161	0.244	0.00274833	0.659836
Rims1	1.80981e-30	-0.668063	0.344	0.524	3.20662e-26	0.656488
Fgf14	5.76297e-23	-1.08543	0.217	0.331	1.02108e-18	0.655589
Calm2	3.73851e-22	-0.29273	0.27	0.412	6.62389e-18	0.65534
Arhgef2	1.22807e-09	-0.287267	0.252	0.385	2.1759e-05	0.654545
March1	1.376e-44	-0.734656	0.395	0.604	2.43801e-40	0.653973
Nkain3	1.00387e-40	-0.594553	0.392	0.6	1.77866e-36	0.653333
Dpysl5	2.16568e-10	-0.288938	0.212	0.326	3.83716e-06	0.650307
Slc44a1	6.99835e-10	-0.279006	0.2	0.309	1.23997e-05	0.647249
Kcnq5	7.51329e-37	-1.03937	0.351	0.544	1.33121e-32	0.64522
Cadps2	4.95386e-24	-1.02053	0.311	0.483	8.77725e-20	0.643892
Usp29	1.04069e-19	-0.406421	0.268	0.418	1.8439e-15	0.641148
Thsd7b	2.56288e-07	-0.300658	0.089	0.139	0.0045409	0.640287
Pkia	7.12122e-18	-0.304878	0.244	0.382	1.26174e-13	0.638743
Gpr158	1.70863e-17	-0.468692	0.236	0.37	3.02736e-13	0.637838
Csrnp3	1.21019e-18	-0.328054	0.234	0.367	2.14422e-14	0.637602
L3mbtl4	2.76365e-08	-0.281027	0.133	0.209	0.000489664	0.636363
Rad21	1.54156e-17	-0.38031	0.246	0.387	2.73133e-13	0.635659
Brd8	6.59582e-32	-0.381822	0.276	0.435	1.16865e-27	0.634483
Sh3kbp1	1.24026e-15	-0.328384	0.232	0.367	2.1975e-11	0.632152
Cenpc1	2.27595e-17	-0.287879	0.204	0.323	4.03254e-13	0.631579
Sema6d	1.81232e-31	-0.552747	0.285	0.452	3.21107e-27	0.630531
Pid1	4.5817e-15	-0.355935	0.197	0.313	8.11785e-11	0.629393
Ano4	2.09954e-13	-0.321577	0.145	0.232	3.71996e-09	0.625
Opcml	1.14668e-32	-1.00213	0.289	0.464	2.03169e-28	0.622845
Nrxn2	1.84692e-15	-0.308996	0.169	0.273	3.27237e-11	0.619047
Hs6st3	1.54631e-33	-0.883555	0.308	0.498	2.73976e-29	0.618474
Nrg1	2.73884e-38	-1.09574	0.307	0.497	4.85268e-34	0.617706
Myo10	1.61983e-16	-0.365212	0.23	0.373	2.87001e-12	0.616622
Kif5a	5.85863e-10	-0.268164	0.147	0.239	1.03803e-05	0.615063
Asic2	1.31267e-09	-0.556262	0.089	0.145	2.32579e-05	0.613793
Egfr	1.67363e-36	-0.668117	0.32	0.522	2.96533e-32	0.613027
Stxbp5l	4.61907e-39	-0.760639	0.315	0.516	8.18407e-35	0.610465
Kif21b	1.66581e-10	-0.306931	0.155	0.254	2.95148e-06	0.610236
Dlg2	7.98342e-17	-0.533734	0.201	0.33	1.4145e-12	0.609091
Dner	3.27555e-26	-0.617915	0.278	0.461	5.80362e-22	0.603037
Ubash3b	3.32483e-15	-0.418258	0.202	0.335	5.89092e-11	0.602985
Vat1l	1.20905e-10	-0.259511	0.107	0.178	2.14219e-06	0.601123
Pcdha11	2.03631e-12	-0.266264	0.134	0.223	3.60793e-08	0.600897
Cenpp	1.56829e-22	-0.496773	0.228	0.38	2.77869e-18	0.6
Diaph3	1.04051e-48	-0.693084	0.268	0.447	1.84357e-44	0.599552
Mki67	1.15977e-75	-1.30693	0.323	0.543	2.05487e-71	0.594843
Nrep	5.8208e-15	-0.323199	0.164	0.276	1.03133e-10	0.594203
Hivep2	1.71066e-44	-0.697106	0.313	0.529	3.03095e-40	0.591682
Synpr	6.79684e-20	-0.581923	0.218	0.369	1.20426e-15	0.590786
Cacna1c	1.76403e-37	-1.0255	0.281	0.476	3.12551e-33	0.590336
Smc4	4.72903e-43	-0.639461	0.262	0.446	8.3789e-39	0.587444
Hivep3	2.11938e-32	-0.836189	0.242	0.413	3.75511e-28	0.585956
Tenm1	2.12935e-17	-0.475097	0.135	0.231	3.77279e-13	0.584415
Sptbn1	4.70712e-37	-0.714511	0.317	0.544	8.34007e-33	0.58272
Glce	4.91591e-26	-0.671968	0.245	0.422	8.71001e-22	0.580569
Zfp804a	1.13917e-13	-0.334337	0.142	0.246	2.01838e-09	0.577236
Tmtc2	2.31935e-56	-1.00381	0.346	0.602	4.10943e-52	0.574751
Myt1	3.74144e-22	-0.581075	0.213	0.372	6.62908e-18	0.57258
Cacnb4	1.76141e-14	-0.424967	0.143	0.25	3.12087e-10	0.572
Acer3	1.44117e-11	-0.263527	0.101	0.177	2.55347e-07	0.570621
Tmem2	2.5823e-28	-0.522967	0.236	0.414	4.57532e-24	0.570048
Brinp1	3.65956e-13	-0.40043	0.134	0.236	6.48402e-09	0.567796
Camk2d	6.13127e-31	-0.654884	0.229	0.407	1.08634e-26	0.562653
Pag1	2.66163e-20	-0.409975	0.186	0.332	4.71588e-16	0.560241
Gm20687	1.10648e-15	-0.28729	0.122	0.219	1.96047e-11	0.557077
St6galnac3	1.46795e-21	-0.45086	0.167	0.3	2.60092e-17	0.556666
Ncapd2	2.06756e-31	-0.459521	0.187	0.336	3.6633e-27	0.556547
Apba1	9.40138e-31	-0.684011	0.239	0.43	1.66574e-26	0.555814
Celf3	1.94682e-14	-0.360678	0.136	0.245	3.44938e-10	0.555102
Plcl1	6.6435e-28	-0.635476	0.224	0.407	1.1771e-23	0.550368
Slc8a1	3.66323e-21	-0.437916	0.167	0.304	6.49052e-17	0.549342
March3	2.68636e-10	-0.340062	0.112	0.204	4.7597e-06	0.549019
Sphkap	7.83637e-25	-0.631313	0.209	0.381	1.38845e-20	0.548556
Epb41l4a	2.34785e-10	-0.288786	0.101	0.185	4.15992e-06	0.545946
Snhg14	8.02874e-38	-0.715736	0.22	0.404	1.42253e-33	0.544554
Odf2	2.26627e-17	-0.321654	0.144	0.265	4.01539e-13	0.543396
Itm2b	1.03229e-09	-0.256893	0.102	0.19	1.82902e-05	0.536842
Spock1	2.19198e-09	-0.464963	0.082	0.153	3.88375e-05	0.535947
Ccdc18	7.36846e-16	-0.269564	0.097	0.181	1.30554e-11	0.535911
Cntn2	1.16782e-66	-1.40515	0.294	0.551	2.06914e-62	0.533575
Srgap3	2.66533e-39	-0.860172	0.222	0.418	4.72243e-35	0.5311
Ppp1r14c	1.99329e-34	-0.733378	0.215	0.405	3.53171e-30	0.530864
Slc24a3	2.89974e-21	-0.400457	0.112	0.212	5.13777e-17	0.528302
Frmpd3	3.8066e-14	-0.385971	0.114	0.216	6.74453e-10	0.527778
Epb41l1	9.54984e-21	-0.619079	0.147	0.279	1.69204e-16	0.526882
Car10	1.76592e-12	-1.01798	0.108	0.205	3.12886e-08	0.526829
Csmd2	7.12309e-16	-0.475823	0.119	0.226	1.26207e-11	0.526548
Srgap1	4.33054e-13	-0.28249	0.092	0.175	7.67285e-09	0.525714
Ckap5	4.84726e-54	-0.777222	0.242	0.461	8.58837e-50	0.524946
Cadm2	7.52454e-75	-1.65888	0.293	0.561	1.3332e-70	0.522282
Chrna3	2.08407e-11	-0.252833	0.073	0.14	3.69255e-07	0.521428
Dnajc6	0.000139476	-0.265131	0.074	0.142	1	0.521126
Vash1	3.86435e-11	-0.255724	0.093	0.179	6.84686e-07	0.519553
Angpt1	4.33533e-11	-0.31303	0.081	0.156	7.68133e-07	0.51923
Syne1	1.31782e-18	-0.728198	0.128	0.247	2.33492e-14	0.518218
Stmn4	5.32183e-14	-0.277014	0.086	0.166	9.42921e-10	0.518072
Ppp2r2b	6.51902e-23	-0.784297	0.175	0.339	1.15504e-18	0.516224
Mir124a-1hg	6.6298e-31	-0.666416	0.178	0.346	1.17467e-26	0.514451
St18	4.06285e-58	-0.934577	0.271	0.527	7.19857e-54	0.514231
Sort1	4.09253e-16	-0.331729	0.115	0.225	7.25114e-12	0.511111
Cadm3	2.51944e-34	-0.694129	0.186	0.367	4.46394e-30	0.506812
G2e3	4.24476e-35	-0.632355	0.188	0.371	7.52086e-31	0.506738
Mapt	1.33737e-16	-0.414397	0.124	0.245	2.36956e-12	0.506122
Cacna1e	4.58546e-25	-1.10372	0.153	0.303	8.12452e-21	0.50495
Stmn2	5.84338e-31	-0.584995	0.165	0.33	1.03533e-26	0.5
Disc1	4.37632e-11	-0.309789	0.076	0.153	7.75396e-07	0.496732
Map3k13	4.55494e-31	-0.536564	0.15	0.302	8.07044e-27	0.496689
Arpp21	2.22207e-50	-1.44797	0.218	0.439	3.93707e-46	0.496583
Serpini1	1.55086e-12	-0.283912	0.071	0.143	2.74781e-08	0.496503
Arhgap33	1.42596e-19	-0.313268	0.095	0.194	2.52651e-15	0.48969
Nfasc	1.00028e-23	-0.587091	0.136	0.278	1.7723e-19	0.489208
Kcnd3	2.30063e-14	-0.321114	0.066	0.135	4.07626e-10	0.488889
Lzts1	4.99561e-16	-0.448766	0.118	0.242	8.85122e-12	0.487603
Syt9	1.10789e-15	-0.331631	0.078	0.16	1.96296e-11	0.4875
Gap43	6.72264e-32	-0.702583	0.172	0.355	1.19112e-27	0.484507
Syp	1.44385e-11	-0.284903	0.074	0.154	2.55822e-07	0.480519
Ppm1h	1.21759e-29	-0.897158	0.172	0.358	2.15732e-25	0.480447
Chd3	1.15457e-11	-0.271581	0.067	0.141	2.04566e-07	0.475177
Nol4l	7.07287e-14	-0.362855	0.078	0.165	1.25317e-09	0.472727
Atp8a2	1.22114e-18	-0.339667	0.074	0.157	2.16361e-14	0.471337
Eps8	8.27948e-15	-0.321138	0.053	0.113	1.46696e-10	0.469026
Ptn	2.7282e-30	-0.609708	0.15	0.322	4.83383e-26	0.465838
Ncam2	2.03067e-15	-0.477816	0.084	0.181	3.59794e-11	0.464088
Arl6ip1	1.41524e-23	-0.471232	0.106	0.23	2.50753e-19	0.460869
Mapk4	4.5632e-18	-0.452283	0.092	0.2	8.08508e-14	0.46
Kirrel3	6.72118e-16	-1.10053	0.065	0.142	1.19086e-11	0.457746
Rangap1	5.99319e-22	-0.383805	0.095	0.209	1.06187e-17	0.454545
Kcnd2	1.02481e-24	-1.31704	0.116	0.256	1.81576e-20	0.453125
Hmgcll1	3.55497e-10	-0.260942	0.049	0.11	6.2987e-06	0.445454
Pou2f2	1.33174e-15	-0.444797	0.092	0.207	2.35957e-11	0.444444
Gm31409	5.51507e-15	-0.373964	0.079	0.178	9.77159e-11	0.44382
Syn3	4.63739e-40	-0.857412	0.131	0.296	8.21652e-36	0.442567
Kcnk1	8.99304e-13	-0.335969	0.069	0.156	1.59339e-08	0.442307
Tenm2	1.88294e-29	-0.655812	0.109	0.247	3.3362e-25	0.441295
Cyfip2	4.40846e-22	-0.440651	0.082	0.186	7.81091e-18	0.44086
Gm20125	2.20257e-27	-0.454771	0.094	0.215	3.90252e-23	0.437209
Plekhg1	3.37702e-05	-0.262712	0.044	0.102	0.598341	0.431372
Apc2	3.18014e-20	-0.410165	0.075	0.174	5.63456e-16	0.431034
Racgap1	8.29662e-35	-0.47792	0.102	0.237	1.46999e-30	0.43038
Snap91	5.37756e-17	-0.489532	0.095	0.221	9.52795e-13	0.429864
Cit	4.80772e-40	-0.683618	0.131	0.305	8.51831e-36	0.429508
Mmp24	2.96415e-34	-0.641588	0.113	0.266	5.25187e-30	0.424812
Elmo1	2.28328e-56	-1.08929	0.18	0.424	4.04552e-52	0.424528
Sez6	5.79804e-17	-0.324602	0.053	0.126	1.0273e-12	0.420635
Mast1	3.54584e-12	-0.276629	0.053	0.126	6.28252e-08	0.420635
Creb5	2.87532e-20	-0.414742	0.068	0.163	5.09449e-16	0.417178
Efcab11	4.1048e-38	-0.612516	0.107	0.258	7.27288e-34	0.414729
Ptchd4	1.40579e-17	-0.35611	0.055	0.133	2.49078e-13	0.413534
Melk	1.23034e-14	-0.274976	0.055	0.133	2.17991e-10	0.413534
Samd12	3.32155e-68	-1.49478	0.185	0.448	5.88512e-64	0.412946
Top2a	9.41173e-83	-1.27299	0.18	0.436	1.66757e-78	0.412844
Rgs17	3.22204e-16	-0.287959	0.048	0.118	5.70881e-12	0.406779
Unc5d	3.16102e-28	-0.903008	0.095	0.237	5.6007e-24	0.400844
Hist1h1e	6.37732e-17	-0.398163	0.063	0.158	1.12993e-12	0.398734
Cacna1a	1.40568e-44	-1.0658	0.125	0.316	2.49059e-40	0.395569
Cenpe	1.2522e-55	-1.04254	0.133	0.338	2.21864e-51	0.393491
Lin7a	9.17957e-15	-0.412748	0.05	0.128	1.62644e-10	0.390625
Kif15	1.39163e-64	-0.938067	0.14	0.36	2.4657e-60	0.388889
Slc4a4	8.88179e-20	-0.536234	0.059	0.152	1.57368e-15	0.388158
Lrp1b	1.48515e-23	-0.964979	0.075	0.194	2.6314e-19	0.386598
Arhgap20	5.08489e-12	-0.354172	0.051	0.132	9.00941e-08	0.386363
Mastl	6.7772e-21	-0.328943	0.054	0.14	1.20078e-16	0.385714
Pld5	2.87011e-17	-0.383422	0.047	0.122	5.08526e-13	0.385246
Neurod1	3.02612e-52	-0.981883	0.135	0.351	5.36168e-48	0.384615
Ank1	3.42483e-17	-0.382119	0.051	0.133	6.06811e-13	0.383458
Luzp2	2.48364e-26	-0.750006	0.085	0.223	4.40051e-22	0.381166
Prdm8	2.35212e-24	-0.382472	0.062	0.163	4.16748e-20	0.380368
Add3	7.8566e-16	-0.320207	0.049	0.129	1.39203e-11	0.379845
Kif20b	3.1626e-46	-0.80063	0.112	0.295	5.6035e-42	0.379661
Dbf4	2.40245e-24	-0.355357	0.056	0.149	4.25667e-20	0.375839
Lockd	1.29886e-25	-0.472797	0.074	0.198	2.30132e-21	0.373737
Cenpf	1.09175e-58	-1.0467	0.119	0.321	1.93435e-54	0.370716
Hcn1	9.73727e-23	-0.561098	0.063	0.17	1.72525e-18	0.370588
Pde9a	3.55821e-15	-0.339299	0.05	0.135	6.30443e-11	0.37037
Prickle2	3.16245e-22	-0.670317	0.078	0.211	5.60323e-18	0.369668
Bora	5.9843e-27	-0.45361	0.065	0.177	1.0603e-22	0.367231
Cep89	1.99275e-20	-0.350093	0.047	0.129	3.53076e-16	0.364341
Nyap2	1.06521e-37	-0.739803	0.101	0.278	1.88734e-33	0.363309
Srcin1	5.52977e-23	-0.534107	0.067	0.186	9.79764e-19	0.360215
Pdzrn3	7.65015e-25	-0.654052	0.079	0.22	1.35545e-20	0.359091
Tanc2	1.00682e-23	-0.367951	0.042	0.117	1.78388e-19	0.358974
Chrm3	7.2781e-26	-0.656079	0.061	0.17	1.28953e-21	0.358823
Dtna	8.50078e-33	-0.62277	0.08	0.223	1.50617e-28	0.358744
Camk4	5.28446e-28	-0.645164	0.059	0.166	9.36301e-24	0.355421
Ntrk2	1.69268e-28	-0.698151	0.078	0.221	2.99909e-24	0.352941
Lhfp	1.50134e-18	-0.443222	0.038	0.108	2.66007e-14	0.351852
Grin2b	5.23585e-89	-1.6164	0.165	0.469	9.27689e-85	0.351812
St8sia2	2.55534e-33	-0.41098	0.053	0.151	4.52755e-29	0.350993
Ckap2	1.18396e-33	-0.441198	0.06	0.171	2.09774e-29	0.350877
Esco2	8.40713e-23	-0.366829	0.049	0.14	1.48958e-18	0.35
Knl1	6.33602e-81	-0.99311	0.12	0.344	1.12262e-76	0.348837
Syt1	2.27295e-35	-0.788883	0.072	0.208	4.0272e-31	0.346154
Ttk	8.97e-31	-0.439183	0.059	0.171	1.5893e-26	0.345029
Cdh18	1.06425e-14	-0.40916	0.04	0.117	1.88563e-10	0.34188
Shcbp1	3.96396e-23	-0.294732	0.04	0.118	7.02335e-19	0.338983
Sgo1	5.48226e-18	-0.285252	0.038	0.113	9.71347e-14	0.336283
Incenp	1.49454e-43	-0.660139	0.084	0.25	2.64803e-39	0.336
Nrxn3	1.4609e-49	-1.5027	0.095	0.284	2.58843e-45	0.334507
Foxm1	2.63967e-26	-0.356815	0.046	0.138	4.67697e-22	0.333333
Ksr2	1.36378e-20	-0.366732	0.036	0.108	2.41635e-16	0.333333
Neil3	5.00892e-44	-0.705432	0.079	0.24	8.87481e-40	0.329167
Lrrc4c	8.10403e-32	-0.944898	0.06	0.183	1.43587e-27	0.327869
Dpysl3	4.39385e-31	-0.624145	0.067	0.207	7.78502e-27	0.323671
Plxna2	1.7993e-53	-1.06149	0.101	0.314	3.188e-49	0.321656
Ncapg	6.92974e-32	-0.536504	0.064	0.199	1.22781e-27	0.321608
Arhgap11a	5.34709e-33	-0.474582	0.054	0.168	9.47398e-29	0.321428
Lrrtm3	1.6638e-29	-0.775258	0.053	0.165	2.94792e-25	0.321212
Hist1h1b	2.77416e-23	-0.476607	0.047	0.147	4.91527e-19	0.319728
Cntnap4	1.17319e-48	-0.805898	0.072	0.227	2.07866e-44	0.31718
Knstrn	1.17924e-30	-0.398666	0.044	0.139	2.08937e-26	0.316547
Tacc3	7.44811e-32	-0.502619	0.056	0.179	1.31966e-27	0.312849
Dpf3	2.32561e-20	-0.457662	0.036	0.117	4.12051e-16	0.307692
Dlgap5	5.17837e-27	-0.415206	0.043	0.14	9.17504e-23	0.307143
Nuf2	1.78499e-23	-0.391119	0.043	0.141	3.16264e-19	0.304964
Rtkn2	1.25924e-21	-0.440141	0.045	0.15	2.23113e-17	0.3
Unc5c	2.3427e-49	-1.51794	0.082	0.274	4.15079e-45	0.29927
Ect2	9.08257e-55	-0.746352	0.071	0.239	1.60925e-50	0.297071
Aspm	2.8162e-75	-1.23208	0.091	0.313	4.98974e-71	0.290735
Ccna2	1.48056e-25	-0.317703	0.033	0.114	2.62326e-21	0.289473
Anln	3.05372e-58	-0.688778	0.067	0.232	5.41059e-54	0.288793
Zmat4	9.34099e-30	-0.818026	0.049	0.171	1.65504e-25	0.28655
Cdh10	2.74358e-17	-0.479573	0.032	0.112	4.86107e-13	0.285714
Ndc80	3.28232e-32	-0.465706	0.045	0.158	5.81561e-28	0.28481
Gdpd5	1.74087e-14	-0.419762	0.032	0.113	3.08447e-10	0.283186
Bub1	1.93129e-38	-0.548206	0.053	0.189	3.42187e-34	0.280423
Kif11	1.85828e-94	-1.15139	0.095	0.342	3.2925e-90	0.277778
Cdca8	6.51092e-22	-0.292114	0.028	0.101	1.1536e-17	0.277227
Cdk1	3.19816e-31	-0.429592	0.04	0.145	5.66651e-27	0.275862
Kif22	1.12385e-26	-0.41003	0.037	0.137	1.99124e-22	0.270073
Sgo2a	1.19671e-34	-0.47142	0.041	0.152	2.12033e-30	0.269737
Kif4	1.37883e-59	-0.837902	0.07	0.26	2.44301e-55	0.269231
Kif18a	4.67031e-51	-0.682176	0.059	0.22	8.27485e-47	0.268182
Ckap2l	2.10423e-36	-0.533844	0.046	0.173	3.72828e-32	0.265896
Espl1	4.0894e-32	-0.387369	0.035	0.132	7.24561e-28	0.265151
Wscd2	1.6609e-40	-0.697371	0.05	0.189	2.94278e-36	0.26455
Parpbp	5.08569e-22	-0.3827	0.033	0.126	9.01083e-18	0.261905
Aurkb	2.99529e-27	-0.336695	0.028	0.108	5.30705e-23	0.259259
Cdca2	3.31617e-54	-0.852072	0.062	0.244	5.87559e-50	0.254098
Spag5	6.84936e-39	-0.502363	0.04	0.158	1.21357e-34	0.253164
Ndst3	4.45232e-61	-1.12355	0.069	0.274	7.88863e-57	0.251825
Iqgap3	2.918e-30	-0.448452	0.035	0.141	5.17011e-26	0.248227
Runx1t1	8.43887e-18	-0.480377	0.029	0.117	1.4952e-13	0.247863
Ryr2	4.58998e-44	-1.00648	0.045	0.182	8.13253e-40	0.247253
Cpeb2	3.95531e-24	-0.437407	0.03	0.122	7.00801e-20	0.245901
Cep55	2.02746e-27	-0.335901	0.026	0.106	3.59225e-23	0.245283
Kif2c	3.16021e-19	-0.316952	0.025	0.102	5.59927e-15	0.245098
Bub1b	2.28007e-45	-0.566821	0.042	0.172	4.03984e-41	0.244186
Kif18b	8.73951e-37	-0.51212	0.038	0.156	1.54847e-32	0.24359
Gm13052	1.61626e-20	-0.450157	0.025	0.103	2.86369e-16	0.242718
Mis18bp1	1.76032e-54	-0.77521	0.054	0.223	3.11894e-50	0.242152
March4	1.98981e-28	-0.427892	0.026	0.108	3.52555e-24	0.240741
Cntn1	2.79464e-38	-0.778243	0.042	0.179	4.95155e-34	0.234637
Tpx2	2.59419e-64	-0.918438	0.06	0.259	4.59638e-60	0.23166
Kpna2	2.2738e-32	-0.392959	0.028	0.121	4.02872e-28	0.231405
Nusap1	6.74279e-48	-0.588097	0.04	0.174	1.19469e-43	0.229885
Ccnf	4.46891e-38	-0.538197	0.036	0.159	7.91801e-34	0.226415
Ephb1	2.37464e-57	-1.50726	0.061	0.274	4.20738e-53	0.222628
Kif23	1.00568e-56	-0.793715	0.048	0.217	1.78187e-52	0.221198
Troap	1.23533e-28	-0.373617	0.024	0.109	2.18875e-24	0.220183
Prc1	8.35114e-60	-0.727466	0.044	0.204	1.47965e-55	0.215686
Gm26871	6.64495e-31	-0.609738	0.029	0.139	1.17735e-26	0.208633
Kif14	1.94339e-49	-0.643448	0.035	0.176	3.4433e-45	0.198864
Gabbr2	7.60607e-54	-0.901365	0.037	0.187	1.34764e-49	0.197861
Prr11	9.69026e-41	-0.457763	0.026	0.133	1.71692e-36	0.195489
Depdc1b	1.56633e-43	-0.580516	0.031	0.159	2.77522e-39	0.194968
Gas2l3	6.28222e-30	-0.399153	0.021	0.111	1.11308e-25	0.189189
Adamtsl3	2.77145e-52	-1.00425	0.038	0.211	4.91046e-48	0.180095
Hmmr	1.21129e-52	-0.628453	0.027	0.16	2.14616e-48	0.16875
Cenpa	1.58293e-31	-0.471035	0.02	0.121	2.80464e-27	0.165289
Depdc1a	8.63062e-38	-0.41411	0.018	0.11	1.52917e-33	0.163636
Grm1	9.02681e-42	-1.0104	0.026	0.159	1.59937e-37	0.163522
L1cam	1.15033e-33	-0.573554	0.02	0.127	2.03815e-29	0.15748

## Sheet: cluster 2
gene	p_val	avg_log2FC	fraction + in cluster	fraction + not in cluster	p_val_adj	ratio + in:out of cluster
Thsd7b	1.0539e-63	1.57316	0.329	0.111	1.86729e-59	2.96396
Asic2	2.16177e-60	2.17239	0.332	0.117	3.83022e-56	2.8376
Abca1	1.56401e-22	0.688894	0.164	0.059	2.77111e-18	2.77966
Sned1	4.16451e-36	0.970484	0.184	0.067	7.37868e-32	2.74626
Sox6	4.4182e-30	0.795798	0.168	0.064	7.82817e-26	2.625
Gm20559	9.47865e-16	0.473865	0.104	0.04	1.67943e-11	2.59999
Antxr1	2.07843e-24	0.723393	0.185	0.08	3.68256e-20	2.3125
Gulp1	1.2551e-13	0.581103	0.146	0.064	2.22379e-09	2.28125
Lama2	5.82497e-70	1.30586	0.458	0.214	1.03207e-65	2.14019
Col5a2	1.29082e-17	0.570519	0.152	0.072	2.28707e-13	2.11111
Greb1l	2.26929e-102	1.34219	0.526	0.251	4.02073e-98	2.09562
Celsr1	9.02225e-14	0.482823	0.136	0.065	1.59856e-09	2.0923
Angpt1	5.93109e-31	0.903911	0.278	0.133	1.05087e-26	2.09022
Sparcl1	1.49298e-18	0.703819	0.19	0.091	2.64527e-14	2.08791
Arid5b	1.48106e-39	0.822086	0.278	0.136	2.62415e-35	2.04412
Col28a1	2.70053e-13	0.556111	0.152	0.077	4.7848e-09	1.97402
Evc2	7.28302e-11	0.420418	0.129	0.066	1.29041e-06	1.95454
Ttc23	3.13302e-18	0.583995	0.19	0.099	5.55109e-14	1.91919
Plekhh2	3.64271e-11	0.426667	0.112	0.059	6.45416e-07	1.8983
Apcdd1	2.59574e-20	0.665996	0.212	0.112	4.59914e-16	1.89286
Etv5	2.37042e-09	0.608011	0.155	0.082	4.1999e-05	1.89024
Luzp2	7.33595e-35	1.15983	0.356	0.19	1.29978e-30	1.87368
Dgkb	1.45446e-42	1.03533	0.39	0.21	2.57702e-38	1.85714
Tcf7l2	1.40374e-27	0.793352	0.322	0.177	2.48715e-23	1.81921
Adamts19	3.31085e-12	0.663833	0.177	0.1	5.86617e-08	1.77
Slc6a11	9.18967e-06	0.431319	0.127	0.072	0.162823	1.76389
Itpkb	9.83322e-14	0.384453	0.125	0.071	1.74225e-09	1.76056
Cxcr4	6.54503e-07	0.323343	0.1	0.057	0.0115965	1.75438
Itpr2	1.0382e-09	0.523846	0.2	0.115	1.83948e-05	1.73913
Gm13483	1.51453e-12	0.563756	0.192	0.111	2.68345e-08	1.72973
Cyp11a1	1.17101e-05	0.387213	0.114	0.066	0.207479	1.72727
Prkd1	3.32517e-68	1.12627	0.535	0.311	5.89154e-64	1.72026
Rreb1	1.36691e-10	0.394759	0.129	0.075	2.42189e-06	1.72
Fbxl7	4.54513e-17	0.736025	0.243	0.142	8.05306e-13	1.71127
Cfap77	3.81016e-07	0.337627	0.1	0.059	0.00675085	1.69491
Pdlim3	6.31829e-86	1.26587	0.586	0.35	1.11947e-81	1.67429
Palld	2.82994e-13	0.625944	0.227	0.138	5.01408e-09	1.64493
Pros1	1.00429e-07	0.316656	0.101	0.063	0.0017794	1.60317
Fosb	9.40981e-41	0.886003	0.42	0.262	1.66723e-36	1.60305
Prkg1	1.33499e-14	0.544843	0.178	0.112	2.36534e-10	1.58928
Nr3c2	2.40026e-49	1.00306	0.553	0.35	4.25278e-45	1.58
Adam12	3.75374e-08	0.482226	0.112	0.071	0.000665088	1.57746
Pcdh17	3.16772e-06	0.336756	0.1	0.064	0.0561256	1.5625
Loxl1	1.67942e-05	0.381363	0.14	0.09	0.29756	1.55555
Col18a1	3.22226e-07	0.532271	0.178	0.115	0.00570919	1.54782
Adgrv1	4.20327e-05	0.520724	0.17	0.11	0.744735	1.54545
Kctd8	1.67281e-28	0.959254	0.388	0.252	2.96388e-24	1.53968
Itga9	1.46408e-12	0.598222	0.206	0.134	2.59406e-08	1.53731
Sash1	1.2062e-11	0.503819	0.21	0.137	2.13714e-07	1.53285
Mob3b	3.18328e-23	0.688355	0.334	0.218	5.64014e-19	1.53211
Fos	1.4105e-13	0.529951	0.193	0.126	2.49913e-09	1.53174
Epha3	6.7515e-12	0.710994	0.275	0.181	1.19623e-07	1.51934
Pde7b	3.44351e-09	0.55771	0.205	0.135	6.10122e-05	1.51852
Rhoq	5.35121e-09	0.488998	0.191	0.126	9.48127e-05	1.51587
Tenm4	3.07769e-05	0.380435	0.109	0.072	0.545305	1.51389
Per2	1.19859e-09	0.451406	0.174	0.115	2.12366e-05	1.51304
Mmp14	2.46205e-10	0.416234	0.18	0.119	4.36226e-06	1.5126
Ephb4	5.22195e-05	0.274688	0.101	0.067	0.925225	1.50746
Acsf3	2.60141e-05	0.351611	0.116	0.077	0.460918	1.50649
Wwc1	2.21581e-17	0.650263	0.268	0.178	3.92597e-13	1.50562
Fhit	2.4952e-31	0.911535	0.403	0.268	4.421e-27	1.50373
Tspan12	9.20466e-06	0.387152	0.15	0.1	0.163088	1.5
Ghr	4.45845e-27	0.891311	0.387	0.259	7.89949e-23	1.49421
Xylt1	0.00056284	0.392662	0.125	0.084	1	1.48809
Gldc	0.000547365	0.273164	0.101	0.068	1	1.48529
Spats2l	8.80623e-10	0.471085	0.172	0.118	1.56029e-05	1.45763
Pvt1	3.64298e-39	0.776456	0.476	0.327	6.45463e-35	1.45566
Akna	5.35101e-08	0.435307	0.197	0.136	0.000948093	1.44853
Etv1	2.40981e-06	0.334882	0.152	0.105	0.042697	1.44762
Wls	4.90242e-05	0.315026	0.108	0.075	0.868612	1.44
Adamts12	7.84672e-06	0.503738	0.213	0.148	0.139028	1.43919
Egr1	2.09208e-11	0.601098	0.289	0.202	3.70675e-07	1.43069
Mast4	9.82504e-05	0.348033	0.143	0.1	1	1.43
Suclg2	1.68216e-05	0.324803	0.141	0.1	0.298045	1.41
Prex2	0.00011764	0.361435	0.138	0.098	1	1.40816
Vcl	1.46838e-13	0.578918	0.304	0.218	2.60168e-09	1.39449
Pard3b	2.36802e-57	0.794902	0.735	0.529	4.19565e-53	1.38941
Adamts20	1.97939e-23	0.626011	0.336	0.242	3.50709e-19	1.38843
St6galnac5	0.000454354	0.387256	0.126	0.091	1	1.38461
Calcrl	0.000417277	0.360716	0.149	0.108	1	1.37963
Lima1	1.37274e-06	0.400149	0.206	0.151	0.0243221	1.36424
Gria3	2.41825e-25	0.708868	0.483	0.355	4.28466e-21	1.36056
Acer3	1.71205e-10	0.499694	0.22	0.162	3.0334e-06	1.35802
Arhgap31	1.55199e-22	0.633298	0.385	0.284	2.74982e-18	1.35563
Adamtsl1	0.000698974	0.41194	0.134	0.099	1	1.35353
Cyyr1	0.0367196	0.312432	0.104	0.077	1	1.35065
L3mbtl3	1.43058e-07	0.508061	0.31	0.23	0.0025347	1.34783
Whrn	6.91171e-19	0.65888	0.411	0.305	1.22462e-14	1.34754
Cttnbp2	1.88933e-12	0.553325	0.352	0.262	3.34751e-08	1.34351
Tcf7l1	8.95979e-05	0.328462	0.145	0.108	1	1.34259
Slc1a3	1.19971e-21	0.66029	0.49	0.365	2.12565e-17	1.34247
Tmem132e	2.88325e-07	0.455856	0.22	0.164	0.00510854	1.34146
Mitf	0.000443039	0.28139	0.122	0.091	1	1.34066
Itsn2	7.03785e-07	0.439776	0.252	0.188	0.0124697	1.34042
Dpyd	6.0052e-06	0.460118	0.219	0.164	0.1064	1.33537
Nhs	5.79164e-23	0.70975	0.474	0.355	1.02616e-18	1.33521
Slc44a5	9.06758e-05	0.381904	0.18	0.135	1	1.33333
Rbms3	1.7317e-20	0.640756	0.469	0.352	3.06822e-16	1.33239
Tgfb2	4.02038e-23	0.648585	0.43	0.323	7.1233e-19	1.33127
Adamts14	3.09999e-15	0.560001	0.349	0.263	5.49256e-11	1.327
Ust	7.36065e-49	0.746016	0.636	0.481	1.30416e-44	1.32225
Dhx32	3.36441e-07	0.405157	0.197	0.149	0.00596105	1.32215
Grm7	0.0166728	0.374254	0.113	0.086	1	1.31395
Arhgap42	1.39793e-11	0.513459	0.333	0.254	2.47686e-07	1.31102
Arhgap26	3.20766e-06	0.420713	0.211	0.161	0.0568333	1.31056
Sema3e	2.49802e-15	0.673172	0.303	0.232	4.426e-11	1.30603
Itgb8	1.71722e-08	0.444931	0.269	0.206	0.000304257	1.30582
Col4a2	8.95884e-05	0.470826	0.218	0.167	1	1.30539
Tmem196	1.72426e-07	0.392428	0.227	0.174	0.00305505	1.3046
Barhl1	4.03175e-27	0.631212	0.514	0.394	7.14345e-23	1.30457
Prdm5	1.70382e-05	0.363833	0.178	0.137	0.301883	1.29927
Pcdh9	1.20786e-28	0.610732	0.589	0.454	2.14009e-24	1.29736
Plxdc2	4.66417e-06	0.364882	0.188	0.145	0.0826397	1.29655
Samd4	3.32945e-09	0.48285	0.226	0.175	5.89912e-05	1.29143
Ncam2	3.31422e-07	0.482772	0.213	0.165	0.00587214	1.29091
Nek7	2.06368e-17	0.533027	0.385	0.299	3.65643e-13	1.28762
Sdc2	0.00206588	0.276616	0.13	0.101	1	1.28713
Epha5	1.14913e-05	0.505299	0.251	0.197	0.203604	1.27411
Cbfa2t3	1.24966e-67	0.821314	0.752	0.592	2.21414e-63	1.27027
Jag1	0.000519935	0.324703	0.141	0.111	1	1.27027
Sipa1l2	5.43476e-19	0.80553	0.447	0.352	9.6293e-15	1.26989
Tmem47	0.152778	0.263924	0.132	0.104	1	1.26923
Gsg1l	4.42863e-93	0.785811	0.91	0.718	7.84665e-89	1.26741
Dock1	1.41165e-44	0.576159	0.786	0.624	2.50116e-40	1.25962
Ntm	4.45696e-64	0.905106	0.799	0.636	7.89683e-60	1.25629
Grin3a	1.08743e-06	0.529347	0.276	0.22	0.0192671	1.25454
Grid2	5.97499e-108	0.942194	0.865	0.69	1.05865e-103	1.25362
Nkd1	2.37174e-22	0.657592	0.49	0.391	4.20225e-18	1.2532
Ccnd1	2.41656e-12	0.499207	0.453	0.362	4.28167e-08	1.25138
Phkb	1.96638e-10	0.500744	0.371	0.298	3.48403e-06	1.24497
Fstl1	0.000217081	0.336221	0.191	0.154	1	1.24026
Draxin	4.44311e-51	0.627407	0.752	0.607	7.8723e-47	1.23888
Dusp10	0.0001459	0.375062	0.174	0.141	1	1.23404
Ikzf2	5.67828e-05	0.361666	0.222	0.18	1	1.23333
Ssbp2	6.12447e-39	0.575811	0.68	0.553	1.08513e-34	1.22966
Rfx2	0.0025566	0.28849	0.145	0.118	1	1.22881
Cdh8	1.37368e-09	0.516453	0.398	0.324	2.43388e-05	1.22839
Wipf1	0.00763463	0.260317	0.147	0.12	1	1.225
Rmst	1.35725e-05	0.537828	0.322	0.263	0.240478	1.22433
Abtb2	1.93408e-06	0.453473	0.301	0.246	0.034268	1.22358
Btbd11	7.68003e-61	0.733387	0.802	0.656	1.36075e-56	1.22256
Sipa1l1	1.42495e-05	0.352376	0.193	0.158	0.252473	1.22152
Cdh12	0.0369775	0.463037	0.212	0.174	1	1.21839
Rftn2	2.13875e-12	0.471007	0.341	0.28	3.78944e-08	1.21786
Trps1	1.97406e-40	0.634919	0.697	0.573	3.49764e-36	1.2164
Cc2d2a	0.00022632	0.368032	0.227	0.187	1	1.2139
Tspan11	0.172641	0.259651	0.12	0.099	1	1.21212
Ero1lb	0.740886	0.374411	0.143	0.118	1	1.21186
Hectd2	9.58739e-13	0.45654	0.356	0.294	1.69869e-08	1.21088
Lpin2	4.91148e-11	0.519515	0.432	0.357	8.70216e-07	1.21008
Pcx	2.47403e-06	0.408761	0.242	0.2	0.0438348	1.21
Sgcd	4.20597e-16	0.551638	0.493	0.408	7.45214e-12	1.20833
Hhip	2.06184e-05	0.452881	0.339	0.281	0.365317	1.20641
Gm29478	0.0135386	0.306357	0.153	0.127	1	1.20472
Irs1	1.04639e-26	0.547932	0.618	0.513	1.854e-22	1.20468
Map2k6	3.76125e-10	0.462098	0.389	0.323	6.66419e-06	1.20433
Ntrk3	1.18146e-238	1.23825	0.974	0.81	2.09331e-234	1.20247
Gpr153	2.6958e-06	0.396328	0.299	0.249	0.0477642	1.2008
Parva	0.00243545	0.358946	0.229	0.191	1	1.19895
Pcdh7	1.81941e-15	0.51302	0.422	0.352	3.22363e-11	1.19886
Prmt8	6.83657e-21	0.627519	0.567	0.473	1.2113e-16	1.19873
Adcyap1r1	0.00840876	0.288882	0.151	0.126	1	1.19841
Ezr	4.0485e-05	0.448495	0.285	0.238	0.717313	1.19748
Gm48530	0.00283228	0.319411	0.182	0.152	1	1.19737
Pde4b	1.7227e-15	0.480086	0.602	0.503	3.05228e-11	1.19682
Rftn1	3.68045e-17	0.516096	0.606	0.508	6.52102e-13	1.19291
Pou3f2	6.26806e-06	0.351428	0.233	0.196	0.111058	1.18877
Lpp	4.32255e-15	0.512447	0.529	0.445	7.6587e-11	1.18876
Jun	2.36309e-09	0.475718	0.359	0.302	4.18692e-05	1.18874
Plscr4	0.155835	0.276155	0.159	0.134	1	1.18657
Prkag2	8.69849e-06	0.391547	0.301	0.254	0.15412	1.18504
Tenm3	1.86912e-11	0.51292	0.411	0.347	3.3117e-07	1.18444
Naaladl2	3.34834e-14	0.533488	0.472	0.399	5.93259e-10	1.18296
Tead2	0.000742801	0.334862	0.272	0.23	1	1.18261
Rpsa	0.0014708	0.335201	0.229	0.194	1	1.18041
Rorb	0.015038	0.323068	0.19	0.161	1	1.18012
Ptprm	0.00113756	0.317659	0.217	0.184	1	1.17935
Grik4	0.0541128	0.348211	0.213	0.181	1	1.17679
Gli3	0.00758456	0.280908	0.201	0.171	1	1.17544
Col4a1	0.0505995	0.401323	0.197	0.168	1	1.17262
Npas3	3.65574e-16	0.539722	0.524	0.447	6.47724e-12	1.17226
Rps5	0.00201962	0.292027	0.177	0.151	1	1.17218
Dnmt3a	0.00200062	0.360604	0.31	0.265	1	1.16981
Igdcc4	3.50797e-09	0.451786	0.477	0.408	6.21543e-05	1.16912
Egfem1	2.30494e-19	0.677041	0.554	0.475	4.0839e-15	1.16632
Smad3	0.00805775	0.365764	0.281	0.241	1	1.16597
Mdga2	1.78083e-08	0.503935	0.373	0.32	0.000315528	1.16562
Rpl13a	0.00729497	0.329469	0.254	0.218	1	1.16514
Robo2	7.97946e-160	1.05788	0.926	0.795	1.4138e-155	1.16478
Sept8	0.0080996	0.2973	0.177	0.152	1	1.16447
Bckdhb	0.0344233	0.261378	0.192	0.165	1	1.16364
Sema7a	3.04763e-16	0.465191	0.599	0.515	5.3998e-12	1.16311
Cyp7b1	0.0119702	0.335679	0.291	0.251	1	1.15936
Ncor2	4.4171e-81	0.69979	0.921	0.795	7.82622e-77	1.15849
Meis2	0.0617793	0.334592	0.132	0.114	1	1.15789
Slc1a2	3.93008e-35	0.687692	0.721	0.623	6.96331e-31	1.1573
Eef1g	1.24574e-06	0.282769	0.192	0.166	0.022072	1.15663
Cerk	6.79249e-06	0.361032	0.278	0.241	0.120349	1.15353
Fat1	0.000648777	0.340565	0.287	0.249	1	1.15261
Sesn3	0.0671884	0.317778	0.192	0.167	1	1.1497
Epb41l4b	0.103735	0.296536	0.225	0.196	1	1.14796
Ddx21	0.00462939	0.283553	0.203	0.177	1	1.14689
Mamdc2	0.0066683	0.350812	0.219	0.191	1	1.1466
Kank1	0.0833644	0.326867	0.189	0.165	1	1.14545
Crim1	3.32604e-05	0.308624	0.197	0.172	0.589308	1.14535
Mef2c	0.000559568	0.28169	0.184	0.161	1	1.14286
Tacc1	0.089949	0.312646	0.225	0.197	1	1.14213
Abcd2	0.23875	0.260474	0.145	0.127	1	1.14173
Eef1a1	8.91223e-07	0.402012	0.411	0.36	0.0157907	1.14167
Tmem55a	0.000249545	0.2968	0.194	0.17	1	1.14118
Maml2	4.40492e-81	0.635966	0.876	0.769	7.80464e-77	1.13914
Med25	0.0154596	0.300304	0.197	0.173	1	1.13873
Nxpe4	3.43781e-05	0.401701	0.397	0.349	0.609111	1.13754
Ptprg	2.9929e-151	1.14552	0.935	0.822	5.30282e-147	1.13747
Diaph2	1.6255e-11	0.372462	0.472	0.415	2.88006e-07	1.13735
Baz1a	0.000303675	0.346076	0.341	0.3	1	1.13667
Npm1	0.00114652	0.313505	0.302	0.266	1	1.13534
Tmtc1	0.00010832	0.396582	0.337	0.297	1	1.13468
Gnl3	0.000413134	0.314649	0.271	0.239	1	1.13389
Zfp462	3.48878e-22	0.450683	0.605	0.535	6.18142e-18	1.13084
Vgll4	0.00022654	0.335585	0.286	0.253	1	1.13043
Rack1	0.0123219	0.2711	0.182	0.161	1	1.13043
Firre	0.2237	0.281437	0.21	0.186	1	1.12903
Akap13	3.37916e-09	0.367072	0.484	0.429	5.98719e-05	1.1282
Rassf3	8.69505e-12	0.429056	0.626	0.555	1.54059e-07	1.12793
Cadm1	1.73277e-49	0.499875	0.924	0.821	3.07012e-45	1.12546
Ptch1	9.77655e-61	0.624633	0.916	0.814	1.73221e-56	1.12531
Mybbp1a	0.0341657	0.2538	0.19	0.169	1	1.12426
Tle1	3.69486e-17	0.494347	0.596	0.531	6.54656e-13	1.12241
Ccdc88c	0.00658722	0.322136	0.313	0.279	1	1.12186
Immp2l	0.267297	0.345875	0.205	0.183	1	1.12022
Tenm1	0.0247176	0.251051	0.243	0.217	1	1.11982
Mib1	3.16051e-15	0.430234	0.547	0.489	5.59979e-11	1.11861
Med12l	9.07536e-11	0.35688	0.543	0.486	1.60797e-06	1.11728
Cdk6	3.73522e-57	0.488816	0.896	0.802	6.61806e-53	1.11721
Chsy3	0.305435	0.301441	0.183	0.164	1	1.11585
Pcdh11x	0.129931	0.295048	0.161	0.145	1	1.11034
Hip1	8.54602e-05	0.346826	0.312	0.281	1	1.11032
Cdc14a	0.000100576	0.299117	0.293	0.264	1	1.10985
Nkain3	1.06554e-18	0.593478	0.632	0.57	1.88792e-14	1.10877
Cbx5	2.62506e-15	0.405378	0.605	0.546	4.65108e-11	1.10806
Zmiz1	9.24309e-142	0.906971	0.934	0.843	1.63769e-137	1.10795
Zfp516	0.000781386	0.305346	0.252	0.228	1	1.10526
Dph6	0.00442465	0.275247	0.233	0.211	1	1.10426
Eya4	2.40076e-06	0.368396	0.404	0.366	0.0425366	1.10382
Cdh20	2.15737e-109	0.694365	0.984	0.893	3.82243e-105	1.1019
Wwox	7.34819e-15	0.447029	0.693	0.63	1.30195e-10	1.1
Robo1	4.27192e-13	0.41813	0.615	0.56	7.56899e-09	1.09821
Kcnh7	7.58676e-91	1.18483	0.884	0.805	1.34422e-86	1.09814
Tshz2	3.32329e-19	0.40627	0.84	0.765	5.8882e-15	1.09804
Sacs	1.78578e-13	0.37979	0.542	0.495	3.16404e-09	1.09495
Epb41l5	0.0228508	0.262551	0.2	0.183	1	1.0929
Sox4	0.000709641	0.317042	0.237	0.217	1	1.09217
Angptl2	0.198028	0.257244	0.195	0.179	1	1.08938
Abcc1	0.051406	0.255217	0.234	0.215	1	1.08837
Boc	1.17655e-10	0.324716	0.724	0.666	2.0846e-06	1.08709
Nalcn	7.02941e-10	0.418313	0.588	0.541	1.24547e-05	1.08688
Ptch2	6.58995e-05	0.35574	0.508	0.468	1	1.08547
Stx6	5.12731e-05	0.311941	0.364	0.336	0.908457	1.08333
Adk	1.38584e-05	0.333591	0.497	0.459	0.245543	1.08279
Lhfpl3	0.621565	0.292736	0.145	0.134	1	1.08209
Gm20388	3.53233e-13	0.36061	0.622	0.575	6.25858e-09	1.08174
Mipol1	0.063852	0.26434	0.241	0.223	1	1.08072
Pabpc1	0.00651077	0.291952	0.308	0.285	1	1.0807
Peak1	7.12362e-06	0.31529	0.389	0.36	0.126216	1.08056
Gas5	0.0124446	0.283667	0.278	0.258	1	1.07752
Tpcn1	1.05773e-06	0.309338	0.435	0.404	0.0187409	1.07673
Magi2	8.4479e-52	0.518924	0.919	0.854	1.4968e-47	1.07611
Etv6	0.00115356	0.297885	0.402	0.374	1	1.07487
Pdzrn4	0.00360602	0.434817	0.403	0.375	1	1.07467
Rpl4	0.0795767	0.298178	0.308	0.287	1	1.07317
Sfrp1	5.6318e-06	0.369888	0.523	0.488	0.0997843	1.07172
Tmem245	0.10241	0.266769	0.296	0.277	1	1.06859
Ltbp3	0.00537882	0.260069	0.25	0.234	1	1.06838
Mgat4c	0.00638299	0.694236	0.299	0.28	1	1.06786
Adarb2	0.000196314	0.340706	0.646	0.605	1	1.06777
Wdr43	0.00108839	0.269038	0.348	0.326	1	1.06748
Uri1	0.0269621	0.252649	0.319	0.299	1	1.06689
Rora	6.58529e-85	0.627545	0.977	0.917	1.16678e-80	1.06543
Adamts6	5.77649e-07	0.305601	0.539	0.506	0.0102348	1.06522
Eif4a1	0.00695664	0.270373	0.281	0.264	1	1.06439
Prkdc	0.137317	0.254344	0.219	0.206	1	1.06311
Stk3	0.0103473	0.301366	0.459	0.432	1	1.0625
Disp3	0.0954445	0.333371	0.299	0.282	1	1.06028
Bcl11a	0.0197599	0.302415	0.461	0.435	1	1.05977
Gtf3c1	0.0026761	0.322197	0.448	0.423	1	1.0591
Mdga1	5.1284e-16	0.415723	0.719	0.68	9.0865e-12	1.05735
Cacnb2	0.478417	0.267298	0.188	0.178	1	1.05618
Ralyl	0.0349578	0.379123	0.339	0.321	1	1.05607
Ppp1r9a	2.37841e-10	0.344035	0.641	0.607	4.21407e-06	1.05601
Zeb2	3.47104e-13	0.317025	0.74	0.703	6.14999e-09	1.05263
Adamts1	0.00015604	0.255594	0.164	0.156	1	1.05128
Nedd4	4.93608e-31	0.340375	0.841	0.8	8.74575e-27	1.05125
Bcas3	1.41036e-07	0.323722	0.6	0.571	0.00249888	1.05079
Kdm6b	0.0599833	0.250492	0.335	0.319	1	1.05016
Zeb1	5.43361e-173	0.773515	0.99	0.945	9.62726e-169	1.04762
Mir99ahg	6.32022e-41	0.43245	0.928	0.886	1.11982e-36	1.0474
Taf1d	0.00674924	0.273338	0.384	0.367	1	1.04632
Map4k4	1.13248e-24	0.454559	0.903	0.864	2.00652e-20	1.04514
Flrt2	0.00203506	0.302057	0.395	0.378	1	1.04497
Efna5	6.21853e-09	0.30521	0.564	0.54	0.00011018	1.04444
mt-Nd5	0.000116127	0.271701	0.412	0.395	1	1.04304
Ralgapa2	2.13054e-11	0.363347	0.661	0.634	3.77488e-07	1.04259
Phf21a	2.374e-13	0.30743	0.768	0.737	4.20625e-09	1.04206
Mdn1	0.000107273	0.261845	0.424	0.407	1	1.04177
Tbc1d16	3.15859e-08	0.31659	0.547	0.526	0.000559639	1.03992
Hdac9	3.59039e-08	0.278196	0.731	0.703	0.000636145	1.03983
Eif4a2	0.0028258	0.253913	0.316	0.304	1	1.03947
Nck2	1.92261e-06	0.342889	0.46	0.443	0.0340648	1.03837
Smyd3	0.000634986	0.283474	0.545	0.526	1	1.03612
Rnd3	0.121078	0.253971	0.408	0.394	1	1.03553
Tead1	4.07873e-09	0.304358	0.726	0.702	7.22669e-05	1.03419
Gse1	7.14852e-16	0.331857	0.878	0.85	1.26657e-11	1.03294
Zc3h12b	0.047185	0.266177	0.348	0.338	1	1.02959
Hdac4	4.38883e-06	0.291493	0.527	0.513	0.0777614	1.02729
Arl15	0.000215644	0.26357	0.63	0.614	1	1.02606
Dync2h1	0.000818447	0.25568	0.492	0.481	1	1.02287
Qk	2.47511e-05	0.27454	0.602	0.589	0.43854	1.02207
Atp8a1	0.0378181	0.264665	0.38	0.372	1	1.02151
Adgrb3	1.98605e-30	0.346606	0.977	0.957	3.51888e-26	1.0209
Cbfa2t2	0.00016293	0.312961	0.547	0.536	1	1.02052
Itpr1	0.438098	0.251615	0.279	0.274	1	1.01825
Meis1	7.42046e-27	0.432801	0.921	0.906	1.31476e-22	1.01656
Babam2	0.10122	0.254435	0.411	0.405	1	1.01481
Nlgn1	3.11825e-14	0.375525	0.864	0.853	5.52492e-10	1.0129
Tmem163	3.41866e-08	0.279572	0.659	0.651	0.000605718	1.01229
Arhgef12	0.00028161	0.255149	0.503	0.497	1	1.01207
Zbtb20	2.03336e-37	0.290035	0.985	0.975	3.60271e-33	1.01026
mt-Rnr1	2.45845e-54	0.367003	0.998	0.991	4.35587e-50	1.00706
Rbfox3	4.71922e-22	0.589851	0.912	0.906	8.36151e-18	1.00662
mt-Rnr2	2.02154e-66	0.367111	0.999	0.993	3.58176e-62	1.00604
Hs3st5	1.58431e-06	0.25004	0.815	0.811	0.0280709	1.00493
Nfia	3.64506e-109	0.393798	1	0.999	6.45832e-105	1.001
Ebf2	0.0468673	0.304252	0.353	0.353	1	1
Cacna2d1	4.95611e-20	-0.291376	0.988	0.991	8.78124e-16	0.996973
Sncaip	0.00236322	0.251062	0.458	0.461	1	0.993492
Slc2a13	0.0461031	0.277027	0.421	0.426	1	0.988263
Thsd4	0.46564	0.312218	0.236	0.239	1	0.987447
Smoc1	0.17028	0.269801	0.438	0.444	1	0.986486
Auts2	4.4115e-77	-0.475632	0.961	0.98	7.81629e-73	0.980612
Grik2	8.70751e-20	-0.332744	0.941	0.963	1.5428e-15	0.977155
Celf2	1.5048e-100	-0.712183	0.941	0.98	2.6662e-96	0.960204
Erbb4	5.16442e-57	-0.754734	0.881	0.929	9.15031e-53	0.948331
Zfpm2	1.53877e-09	-0.768354	0.67	0.71	2.7264e-05	0.943662
Gria4	9.3832e-15	-0.361591	0.815	0.866	1.66251e-10	0.941108
Ank3	3.70694e-76	-0.574343	0.89	0.954	6.56795e-72	0.932914
Pde4d	3.32788e-36	-0.595636	0.831	0.9	5.89634e-32	0.923333
Nbea	3.42314e-10	-0.257839	0.791	0.857	6.06512e-06	0.922987
Nedd4l	1.09242e-13	-0.293783	0.748	0.813	1.93555e-09	0.920049
Ccser1	7.80758e-42	-0.512592	0.822	0.897	1.38335e-37	0.916388
Reln	4.53997e-40	-0.422395	0.836	0.916	8.04392e-36	0.912664
Nav2	9.8209e-112	-0.765997	0.886	0.971	1.74007e-107	0.912461
Fam155a	7.05965e-35	-0.402767	0.83	0.916	1.25083e-30	0.906113
Thsd7a	5.75423e-27	-0.503372	0.766	0.846	1.01953e-22	0.905437
Astn2	6.55911e-71	-0.674209	0.814	0.906	1.16214e-66	0.898455
Ank2	6.62056e-62	-0.642171	0.822	0.916	1.17303e-57	0.89738
Fgf14	0.0367425	-0.57707	0.288	0.321	1	0.897196
Nav1	1.12597e-25	-0.345577	0.782	0.876	1.99499e-21	0.892694
Pde1c	1.259e-52	-0.669606	0.793	0.89	2.23069e-48	0.891011
Gli2	5.78676e-08	-0.256969	0.551	0.619	0.0010253	0.890145
Ebf1	5.61443e-54	-0.452429	0.824	0.931	9.94765e-50	0.88507
Ncam1	1.92655e-34	-0.4114	0.789	0.901	3.41347e-30	0.875694
Ppp3ca	1.5332e-13	-0.294024	0.704	0.805	2.71653e-09	0.874534
Ptprs	1.64936e-39	-0.494532	0.702	0.812	2.92234e-35	0.864532
Pbx3	1.22551e-37	-0.484722	0.747	0.872	2.17136e-33	0.856651
Tnik	6.58777e-31	-0.628775	0.647	0.759	1.16722e-26	0.852437
Cadps	5.56619e-43	-0.43868	0.714	0.84	9.86218e-39	0.85
Aff3	2.23532e-17	-0.298183	0.659	0.777	3.96055e-13	0.848134
Tmem178b	1.16425e-32	-0.414383	0.706	0.833	2.06282e-28	0.847539
Syne2	2.46007e-16	-0.26266	0.599	0.709	4.35875e-12	0.844852
Fmnl2	1.18147e-16	-0.322272	0.631	0.747	2.09333e-12	0.844712
Ctnna2	6.51783e-102	-0.861757	0.766	0.915	1.15483e-97	0.837158
Trio	1.63549e-19	-0.308262	0.619	0.74	2.89777e-15	0.836486
Arhgap21	1.01596e-12	-0.260636	0.549	0.669	1.80007e-08	0.820628
Phactr1	4.653e-23	-0.346379	0.652	0.795	8.24418e-19	0.820126
Map2	2.45084e-69	-0.660534	0.714	0.871	4.34239e-65	0.819747
Sobp	2.38033e-20	-0.423016	0.613	0.749	4.21747e-16	0.818424
Zfp536	1.18168e-20	-0.356327	0.598	0.731	2.0937e-16	0.818057
Apc	5.24456e-36	-0.558945	0.653	0.8	9.29231e-32	0.81625
Scn8a	9.01592e-10	-0.257353	0.55	0.675	1.59744e-05	0.814815
Gm38399	1.63523e-15	-0.298988	0.558	0.685	2.89731e-11	0.814598
Frmd4a	9.66287e-78	-0.630716	0.701	0.861	1.71207e-73	0.814169
Kcnd2	0.00114611	-0.638387	0.197	0.245	1	0.804081
Tmtc2	5.87341e-19	-0.481444	0.468	0.584	1.04065e-14	0.80137
Zfp704	1.82826e-30	-0.434094	0.573	0.716	3.23932e-26	0.800279
Cep170	1.81447e-13	-0.296081	0.517	0.651	3.21487e-09	0.794163
Gria2	5.96227e-37	-0.433146	0.61	0.77	1.0564e-32	0.792208
Cask	1.48746e-17	-0.342914	0.507	0.64	2.63548e-13	0.792187
Phf20l1	8.5142e-11	-0.265139	0.456	0.577	1.50855e-06	0.790294
Enox1	3.81978e-46	-0.585734	0.609	0.774	6.76788e-42	0.786822
Bach2	2.87889e-15	-0.315815	0.538	0.684	5.10081e-11	0.78655
Ssbp3	2.63745e-11	-0.284736	0.454	0.578	4.67304e-07	0.785467
Mapk10	9.43559e-13	-0.363831	0.5	0.641	1.6718e-08	0.780031
Dlgap1	2.22946e-17	-0.376104	0.477	0.613	3.95015e-13	0.77814
Srrm4	4.87736e-24	-0.399716	0.576	0.741	8.64171e-20	0.777328
Afdn	2.93509e-15	-0.280297	0.467	0.603	5.20039e-11	0.774461
Kif5c	3.04007e-27	-0.397134	0.536	0.693	5.3864e-23	0.773449
Zic1	3.51007e-16	-0.301147	0.478	0.62	6.21915e-12	0.770968
Nell2	5.68481e-15	-0.262734	0.437	0.568	1.00723e-10	0.769366
Gm4258	8.49027e-19	-0.378887	0.467	0.608	1.50431e-14	0.768092
Dclk1	4.0017e-18	-0.274583	0.487	0.639	7.0902e-14	0.762128
Kirrel3	0.0111723	-0.629908	0.104	0.137	1	0.759124
Zfp521	4.587e-52	-0.796002	0.531	0.703	8.12725e-48	0.755334
Edil3	2.90957e-27	-0.544462	0.512	0.679	5.15517e-23	0.75405
Syne1	0.000203927	-0.364444	0.18	0.239	1	0.753138
Plcb1	2.24073e-58	-0.735871	0.561	0.745	3.97012e-54	0.75302
Hectd4	1.34414e-14	-0.284981	0.391	0.52	2.38154e-10	0.751923
Epb41	1.51236e-17	-0.293878	0.426	0.568	2.67961e-13	0.75
Prkcb	2.36912e-92	-0.828196	0.649	0.866	4.1976e-88	0.749423
Fat3	2.5769e-08	-0.335288	0.302	0.403	0.000456575	0.749379
Macrod2	2.23613e-38	-0.574427	0.546	0.729	3.96198e-34	0.748971
Nav3	2.04116e-63	-0.781816	0.586	0.786	3.61653e-59	0.745547
Ezh2	8.01995e-13	-0.302129	0.418	0.561	1.42097e-08	0.745098
Tnrc6c	2.88305e-11	-0.260235	0.376	0.506	5.10819e-07	0.743083
Fyn	1.34216e-15	-0.32028	0.425	0.572	2.37804e-11	0.743007
Nsd2	2.14766e-27	-0.439887	0.494	0.665	3.80522e-23	0.742857
Enah	3.13184e-14	-0.321603	0.418	0.563	5.54899e-10	0.742451
Ptprn2	5.05203e-19	-0.325383	0.411	0.554	8.95118e-15	0.741877
Ralgps2	2.61704e-10	-0.279304	0.388	0.523	4.63687e-06	0.741874
Ldlrad4	9.44728e-14	-0.262368	0.33	0.445	1.67387e-09	0.741573
Pde3a	7.85849e-18	-0.349651	0.433	0.585	1.39237e-13	0.740171
Evl	2.86479e-13	-0.296012	0.41	0.554	5.07583e-09	0.740072
Nova1	7.25904e-18	-0.309356	0.395	0.534	1.28616e-13	0.7397
Cdh4	9.12592e-25	-0.421475	0.428	0.579	1.61693e-20	0.739205
Agtpbp1	3.31264e-12	-0.258746	0.362	0.49	5.86933e-08	0.738775
Asxl1	6.46725e-09	-0.26013	0.312	0.423	0.000114587	0.737588
Pde3b	1.93548e-20	-0.364507	0.45	0.611	3.42928e-16	0.736497
Grid1	8.70383e-15	-0.272153	0.339	0.462	1.54214e-10	0.733766
Galnt13	2.6243e-07	-0.270363	0.278	0.379	0.00464973	0.733509
Rnf165	1.40521e-15	-0.283332	0.377	0.514	2.48975e-11	0.733463
Bicd1	4.31606e-24	-0.382971	0.422	0.578	7.6472e-20	0.730104
Dpysl2	6.16121e-14	-0.27031	0.362	0.496	1.09164e-09	0.729839
Ephb2	2.39515e-19	-0.326242	0.42	0.576	4.24372e-15	0.729167
Kcnb2	2.55089e-108	-1.06044	0.603	0.828	4.51966e-104	0.728261
Itsn1	7.40903e-17	-0.357538	0.403	0.554	1.31273e-12	0.727437
Rbfox1	6.49503e-129	-1.23992	0.628	0.864	1.15079e-124	0.726852
Pclo	2.11835e-20	-0.391546	0.343	0.472	3.7533e-16	0.726695
Dcx	1.395e-23	-0.498998	0.413	0.569	2.47166e-19	0.725835
Smc2	3.95733e-16	-0.411093	0.338	0.467	7.0116e-12	0.723769
Synpr	2.70163e-10	-0.301814	0.261	0.361	4.78674e-06	0.722991
Sptan1	4.29705e-10	-0.276888	0.326	0.452	7.6135e-06	0.721239
Srgap2	1.53961e-38	-0.623491	0.512	0.71	2.72789e-34	0.721127
Unc79	4.03785e-17	-0.2639	0.333	0.462	7.15426e-13	0.720779
Basp1	4.29791e-26	-0.472917	0.436	0.606	7.61504e-22	0.719472
Crmp1	7.87227e-14	-0.317553	0.346	0.481	1.39481e-09	0.719335
Tmeff1	2.81705e-19	-0.254198	0.294	0.409	4.99126e-15	0.718826
Erc1	2.17807e-19	-0.326497	0.346	0.482	3.85911e-15	0.717842
Msra	1.49268e-13	-0.511428	0.355	0.495	2.64473e-09	0.717172
Pak7	2.68803e-36	-0.602857	0.476	0.664	4.76265e-32	0.716867
Cnksr2	3.54873e-21	-0.474498	0.433	0.605	6.28764e-17	0.715702
Rad51b	1.47551e-12	-0.324854	0.285	0.4	2.61431e-08	0.7125
Elavl2	2.99103e-12	-0.32712	0.323	0.454	5.29951e-08	0.711454
Myo10	2.73429e-13	-0.250801	0.261	0.368	4.84462e-09	0.709239
Ccbe1	1.7083e-14	-0.289973	0.239	0.338	3.02676e-10	0.7071
Nucks1	4.91142e-12	-0.288277	0.263	0.372	8.70205e-08	0.706989
Sv2b	2.19961e-24	-0.432084	0.434	0.615	3.89727e-20	0.705691
Negr1	6.71281e-39	-0.576525	0.479	0.681	1.18938e-34	0.703377
Opcml	7.65607e-18	-0.701619	0.321	0.457	1.3565e-13	0.702407
Dek	4.63804e-09	-0.253848	0.257	0.366	8.21767e-05	0.702186
Astn1	6.24233e-27	-0.387518	0.372	0.53	1.10602e-22	0.701887
Mphosph9	2.3659e-20	-0.310237	0.331	0.472	4.19189e-16	0.701271
Rps6ka3	3.00372e-16	-0.372248	0.284	0.405	5.32199e-12	0.701234
Camk2d	7.2718e-19	-0.42816	0.279	0.398	1.28842e-14	0.701005
Mpped2	2.29248e-15	-0.277542	0.293	0.418	4.06181e-11	0.700957
Soga1	6.98706e-27	-0.396947	0.386	0.551	1.23797e-22	0.700544
Cog7	8.30761e-20	-0.344806	0.353	0.504	1.47194e-15	0.700397
Gtdc1	3.85474e-28	-0.399963	0.396	0.568	6.82983e-24	0.697183
Cadps2	4.64946e-28	-0.879412	0.332	0.477	8.23791e-24	0.696017
Plcl2	8.57421e-16	-0.264143	0.298	0.43	1.51918e-11	0.693023
Ube2e3	5.42201e-11	-0.262777	0.279	0.403	9.60672e-07	0.692308
Megf9	4.07041e-18	-0.28974	0.305	0.441	7.21195e-14	0.69161
Asxl3	1.54349e-21	-0.359037	0.316	0.457	2.73475e-17	0.691466
Dock3	1.79264e-29	-0.441081	0.405	0.586	3.17621e-25	0.691126
Otud7a	2.93448e-22	-0.345338	0.287	0.416	5.19931e-18	0.689904
Jakmip2	2.0129e-22	-0.318333	0.315	0.457	3.56646e-18	0.689278
Ppp2r2c	1.92998e-42	-0.551692	0.47	0.682	3.41954e-38	0.689149
Slc29a1	1.84076e-15	-0.309965	0.281	0.408	3.26146e-11	0.688725
Dync1i2	1.13413e-13	-0.292092	0.298	0.433	2.00946e-09	0.688222
Rab6b	1.20256e-15	-0.401144	0.309	0.449	2.1307e-11	0.688196
Fnbp1l	4.04445e-23	-0.385434	0.361	0.526	7.16596e-19	0.686312
Smpd3	3.0477e-16	-0.290973	0.285	0.416	5.39991e-12	0.685096
Elavl3	1.8939e-27	-0.568727	0.431	0.63	3.35562e-23	0.684127
Cacna2d3	5.41298e-18	-0.502907	0.279	0.408	9.59072e-14	0.683823
Ctif	2.27885e-37	-0.534341	0.415	0.607	4.03767e-33	0.68369
Rb1	3.44252e-19	-0.277774	0.285	0.417	6.09947e-15	0.683453
Osbpl9	3.87279e-14	-0.261042	0.242	0.355	6.86181e-10	0.68169
Cdk5rap2	3.18185e-23	-0.452101	0.345	0.507	5.6376e-19	0.680473
Chrm3	0.000110342	-0.278518	0.11	0.163	1	0.674846
Gabrb3	1.29082e-29	-0.475296	0.359	0.533	2.28708e-25	0.673546
Osbp2	9.53758e-21	-0.319274	0.297	0.441	1.68987e-16	0.673469
Dpp6	4.8936e-16	-0.466429	0.262	0.392	8.67048e-12	0.668367
Sorbs1	1.86239e-46	-0.698433	0.414	0.62	3.29978e-42	0.667742
Gpr137c	9.54541e-20	-0.350335	0.261	0.391	1.69126e-15	0.667519
Scmh1	1.39199e-43	-0.576516	0.406	0.609	2.46632e-39	0.666667
Pax6	9.73661e-21	-0.370816	0.326	0.489	1.72513e-16	0.666667
Brd8	1.72891e-19	-0.38416	0.287	0.431	3.06329e-15	0.665893
Syt11	2.90354e-09	-0.25977	0.225	0.338	5.1445e-05	0.66568
Dixdc1	5.87942e-14	-0.275752	0.224	0.337	1.04172e-09	0.664688
Cep295	1.14061e-12	-0.271255	0.222	0.334	2.02093e-08	0.66467
Igsf21	2.30487e-19	-0.366947	0.256	0.386	4.08377e-15	0.663212
Mast2	2.33166e-23	-0.438847	0.356	0.537	4.13124e-19	0.662942
St6gal1	1.78087e-12	-0.264824	0.221	0.334	3.15535e-08	0.661676
Zfp423	3.64249e-36	-0.633447	0.371	0.562	6.45376e-32	0.660142
Lpgat1	4.58143e-12	-0.251756	0.205	0.311	8.11737e-08	0.659164
Git2	8.46166e-26	-0.373502	0.283	0.43	1.49924e-21	0.658139
Myo1b	5.371e-16	-0.27071	0.192	0.292	9.51634e-12	0.657534
Rab3c	4.34578e-30	-0.458763	0.349	0.531	7.69985e-26	0.65725
Car10	2.20857e-09	-0.683685	0.131	0.2	3.91314e-05	0.655
Calm2	2.47098e-16	-0.328919	0.268	0.41	4.37808e-12	0.653658
C2cd5	1.13063e-15	-0.321868	0.268	0.41	2.00325e-11	0.653658
Tuba1a	7.19389e-22	-0.382761	0.279	0.427	1.27461e-17	0.653396
Kcnip3	3.74802e-08	-0.252292	0.158	0.242	0.000664075	0.652892
Arhgef2	7.37854e-13	-0.310286	0.25	0.383	1.30733e-08	0.652741
Lhx1os	7.18515e-20	-0.275047	0.201	0.309	1.27306e-15	0.650485
Tmpo	2.21255e-24	-0.444425	0.289	0.445	3.9202e-20	0.649438
Tiam1	3.76291e-28	-0.440154	0.335	0.516	6.66713e-24	0.649225
Add2	6.70922e-13	-0.350365	0.231	0.356	1.18874e-08	0.648876
Kcnq5	1.85455e-45	-1.0628	0.35	0.541	3.28589e-41	0.64695
Lhx1	9.80781e-13	-0.305655	0.207	0.32	1.73775e-08	0.646875
Pkp4	1.24062e-25	-0.493501	0.288	0.446	2.19812e-21	0.64574
Frmd5	6.99276e-40	-0.548716	0.342	0.532	1.23898e-35	0.642857
Cacnb4	3.79653e-18	-0.303903	0.158	0.246	6.7267e-14	0.642276
Lrp1b	1.45578e-07	-0.628524	0.12	0.187	0.00257935	0.641711
Ncapd3	3.08436e-18	-0.313873	0.225	0.351	5.46487e-14	0.641025
Mtss1	3.10496e-46	-0.804428	0.379	0.595	5.50137e-42	0.636975
Fgf13	6.08231e-51	-0.854923	0.393	0.617	1.07766e-46	0.636953
Cenpc1	1.07804e-15	-0.284852	0.204	0.321	1.91007e-11	0.635514
Arhgef7	7.58814e-35	-0.423049	0.28	0.442	1.34447e-30	0.633484
Mctp1	1.89232e-06	-0.280576	0.119	0.188	0.0335281	0.632978
Tubb5	8.06596e-13	-0.340336	0.237	0.375	1.42913e-08	0.632
Hivep2	3.41594e-37	-0.660126	0.331	0.524	6.05237e-33	0.631679
Brsk2	1.10726e-24	-0.389955	0.243	0.387	1.96184e-20	0.627907
Galnt17	1.35949e-25	-0.471447	0.278	0.443	2.40875e-21	0.627539
Sept11	2.48599e-22	-0.332628	0.232	0.37	4.40468e-18	0.627027
Dab2ip	1.20997e-09	-0.269498	0.158	0.252	2.14383e-05	0.626984
Prkce	2.92237e-25	-0.536365	0.294	0.469	5.17786e-21	0.626866
Clmp	3.02432e-26	-0.550123	0.313	0.5	5.35849e-22	0.626
Hivep3	3.18559e-25	-0.777324	0.256	0.409	5.64424e-21	0.625917
Pcsk2	1.66315e-18	-0.431859	0.246	0.394	2.94678e-14	0.624365
Xkr6	5.68366e-37	-0.550203	0.283	0.455	1.00703e-32	0.621978
Camk1d	1.49164e-08	-0.267023	0.129	0.208	0.000264289	0.620192
Brinp1	4.05777e-20	-0.349355	0.144	0.233	7.18956e-16	0.618025
Sema6a	3.33555e-81	-1.11801	0.424	0.692	5.90994e-77	0.612717
Hjurp	9.42213e-44	-0.694284	0.321	0.525	1.66941e-39	0.611428
Raph1	5.62899e-13	-0.28904	0.185	0.303	9.97344e-09	0.610561
Nkain1	4.34678e-20	-0.346198	0.17	0.279	7.70162e-16	0.609319
Atad2	2.89785e-19	-0.400384	0.199	0.327	5.13442e-15	0.608563
Sptbn1	1.22905e-40	-0.674728	0.328	0.539	2.17764e-36	0.608534
Sox11	3.30168e-56	-0.727638	0.358	0.589	5.84991e-52	0.60781
Gpsm1	1.47562e-18	-0.271634	0.167	0.275	2.61451e-14	0.607273
Ptn	1.121e-14	-0.333044	0.191	0.315	1.98619e-10	0.606349
Aig1	4.54399e-19	-0.354791	0.163	0.269	8.05103e-15	0.605948
Bin1	5.2691e-24	-0.472055	0.24	0.398	9.33579e-20	0.603015
Kcnma1	8.21253e-23	-0.435522	0.218	0.362	1.4551e-18	0.60221
Slc44a1	1.04533e-20	-0.370159	0.186	0.309	1.85212e-16	0.601942
Gab1	4.36026e-33	-0.522735	0.252	0.419	7.7255e-29	0.601432
Ubash3b	3.34646e-22	-0.318941	0.2	0.333	5.92926e-18	0.6006
Gpm6a	5.30193e-61	-0.947258	0.373	0.622	9.39396e-57	0.599678
Rgmb	9.60392e-17	-0.263867	0.154	0.257	1.70162e-12	0.599222
Dpysl4	2.81582e-16	-0.357206	0.166	0.278	4.98907e-12	0.597122
Afap1	4.26894e-37	-0.535713	0.274	0.459	7.5637e-33	0.59695
Blm	1.2487e-17	-0.279017	0.158	0.265	2.21245e-13	0.596226
Xkr4	1.94943e-97	-1.11233	0.422	0.709	3.45401e-93	0.595204
Plcl1	3.70966e-29	-0.566271	0.239	0.402	6.57277e-25	0.594527
March1	1.33822e-55	-0.897087	0.358	0.605	2.37106e-51	0.591735
Rad21	3.20382e-26	-0.476955	0.228	0.386	5.67652e-22	0.590673
Nnat	3.56741e-20	-0.466314	0.204	0.346	6.32073e-16	0.589595
Cacna1d	6.42412e-26	-0.500985	0.234	0.399	1.13823e-21	0.586466
Tll1	7.8859e-21	-0.408169	0.196	0.336	1.39722e-16	0.583333
Csrnp3	4.81265e-25	-0.455715	0.214	0.367	8.52706e-21	0.583106
Crybg3	1.03264e-18	-0.337355	0.169	0.291	1.82964e-14	0.580756
Map1b	4.99966e-100	-1.07415	0.404	0.697	8.8584e-96	0.579627
Cdh13	4.55611e-30	-0.655089	0.232	0.401	8.07252e-26	0.578553
Sgip1	6.60733e-37	-0.568935	0.264	0.457	1.17069e-32	0.57768
Ntn4	5.8265e-38	-0.533881	0.237	0.411	1.03234e-33	0.576642
Iqgap1	1.38217e-17	-0.262437	0.132	0.229	2.44892e-13	0.576419
Odf2	2.2669e-23	-0.298616	0.151	0.262	4.0165e-19	0.576336
Rad18	5.49642e-14	-0.276281	0.133	0.231	9.73855e-10	0.575757
Nmnat2	5.14502e-23	-0.41348	0.178	0.311	9.11594e-19	0.572347
Miat	2.2202e-137	-1.26524	0.445	0.778	3.93376e-133	0.571979
Usp46	1.44163e-19	-0.342537	0.163	0.285	2.55428e-15	0.57193
Plxnb2	5.45599e-45	-0.583388	0.24	0.42	9.66693e-41	0.571428
Nrn1	7.56989e-17	-0.348473	0.142	0.249	1.34123e-12	0.570281
Kcnj3	9.21537e-61	-0.862911	0.325	0.57	1.63278e-56	0.570175
Gm17750	9.28452e-27	-0.349479	0.167	0.293	1.64503e-22	0.569966
Enox2	1.39609e-32	-0.733924	0.23	0.405	2.4736e-28	0.567901
Mgat5b	1.68484e-34	-0.505652	0.231	0.407	2.98519e-30	0.567567
Klhl29	9.55517e-91	-1.29867	0.371	0.654	1.69299e-86	0.567278
G2e3	5.70463e-25	-0.520995	0.207	0.366	1.01075e-20	0.565574
Sorbs2	3.75199e-15	-0.267802	0.096	0.17	6.64777e-11	0.564706
Epb41l4a	2.71658e-11	-0.302261	0.103	0.183	4.81325e-07	0.562841
Bcl2l1	7.86548e-21	-0.306748	0.126	0.224	1.39361e-16	0.5625
Nova2	1.99087e-29	-0.564398	0.222	0.395	3.52743e-25	0.562025
Cep192	9.29291e-24	-0.395305	0.178	0.318	1.64652e-19	0.559748
Adcy5	2.77669e-19	-0.327373	0.142	0.254	4.91975e-15	0.559055
Unc13a	2.28316e-28	-0.45056	0.178	0.319	4.0453e-24	0.557994
Nrcam	6.72605e-81	-0.920817	0.339	0.609	1.19172e-76	0.55665
Elmo1	7.74153e-46	-0.785683	0.23	0.415	1.37164e-41	0.554217
Zfp385b	4.7319e-53	-0.98927	0.302	0.546	8.38398e-49	0.553113
Ccdc34	1.33117e-17	-0.293916	0.12	0.217	2.35856e-13	0.552995
Inpp4a	2.99703e-20	-0.29761	0.115	0.208	5.31015e-16	0.552884
Srgap3	2.26184e-40	-0.830595	0.228	0.414	4.00753e-36	0.550725
Tmem178	1.19863e-26	-0.458861	0.171	0.311	2.12373e-22	0.549839
Cacna1b	3.19914e-47	-0.637482	0.255	0.465	5.66824e-43	0.548387
Plppr1	8.25602e-109	-1.259	0.355	0.648	1.4628e-104	0.547839
Adarb1	4.75191e-09	-0.297991	0.104	0.19	8.41943e-05	0.547368
Schip1	3.49285e-20	-0.476844	0.168	0.309	6.18863e-16	0.543689
Cadm2	5.87142e-76	-1.5667	0.302	0.556	1.0403e-71	0.543165
Lrrc4c	3.10559e-11	-0.65488	0.096	0.177	5.50249e-07	0.542373
Nexmif	1.83221e-18	-0.361148	0.142	0.262	3.24631e-14	0.541985
Lmnb1	2.38911e-28	-0.579052	0.22	0.407	4.23303e-24	0.54054
Plxna2	1.47831e-22	-0.591758	0.164	0.304	2.61927e-18	0.539474
Cnr1	2.53878e-19	-0.328656	0.119	0.221	4.49821e-15	0.538461
Ppm1h	2.79092e-34	-0.818873	0.189	0.353	4.94495e-30	0.535411
Dscaml1	2.43687e-72	-1.12735	0.315	0.59	4.31764e-68	0.533898
Lrrc49	8.38055e-11	-0.27988	0.107	0.201	1.48487e-06	0.532338
Xkr7	1.39963e-28	-0.42281	0.16	0.301	2.47987e-24	0.531561
Mgll	1.16023e-12	-0.314429	0.112	0.211	2.0557e-08	0.530805
Ankrd13a	7.76978e-14	-0.273744	0.095	0.179	1.37665e-09	0.530726
Uncx	9.13652e-18	-0.400671	0.136	0.257	1.61881e-13	0.529183
Mapt	2.23343e-19	-0.415343	0.128	0.242	3.95719e-15	0.528925
Stxbp1	5.85597e-35	-0.534128	0.185	0.35	1.03756e-30	0.528571
Sept3	5.9793e-41	-0.619133	0.211	0.4	1.05941e-36	0.5275
Plppr3	6.41075e-16	-0.295374	0.097	0.184	1.13586e-11	0.527174
Glce	9.14277e-49	-0.789604	0.222	0.422	1.61992e-44	0.526066
Map3k12	1.97877e-09	-0.253946	0.081	0.154	3.50599e-05	0.525974
Rbl1	3.35172e-17	-0.298567	0.103	0.196	5.93858e-13	0.52551
Rrm1	6.74706e-18	-0.280886	0.104	0.198	1.19544e-13	0.525252
Slc8a3	5.11883e-11	-0.313497	0.085	0.162	9.06954e-07	0.524691
Rai2	1.95127e-17	-0.348132	0.107	0.204	3.45727e-13	0.52451
Grin2b	3.25902e-49	-1.16369	0.239	0.456	5.77433e-45	0.524123
Ckap5	4.77602e-51	-0.786932	0.24	0.458	8.46216e-47	0.524017
Dbn1	7.21955e-20	-0.319619	0.114	0.218	1.27916e-15	0.522936
March3	1.24315e-14	-0.395008	0.106	0.203	2.20261e-10	0.522167
Cep128	5.98079e-43	-0.624759	0.209	0.401	1.05968e-38	0.521197
Rgs7	4.19706e-23	-0.474555	0.128	0.246	7.43635e-19	0.520325
Nfic	7.71512e-20	-0.354525	0.128	0.246	1.36696e-15	0.520325
Pgm2l1	2.06951e-09	-0.28025	0.095	0.183	3.66675e-05	0.519125
Efr3b	9.2829e-21	-0.417651	0.137	0.264	1.64474e-16	0.518939
Slc24a3	1.65165e-22	-0.445606	0.109	0.211	2.9264e-18	0.516587
Slco3a1	3.30204e-14	-0.270863	0.079	0.153	5.85056e-10	0.51634
Brca1	1.71457e-21	-0.359952	0.113	0.22	3.03788e-17	0.513636
Camk4	6.16871e-14	-0.468427	0.083	0.162	1.09297e-09	0.512345
Stxbp5l	3.03779e-70	-1.00005	0.265	0.518	5.38236e-66	0.511583
Igsf3	1.49591e-17	-0.273415	0.093	0.182	2.65045e-13	0.510989
Usp29	1.83309e-43	-0.687569	0.215	0.421	3.24787e-39	0.510689
Cacna1e	5.48129e-33	-1.08284	0.153	0.3	9.71175e-29	0.51
Syt1	1.023e-15	-0.545837	0.103	0.202	1.81255e-11	0.509901
Nrg1	1.90503e-64	-1.37838	0.254	0.499	3.37534e-60	0.509018
Kcnip4	5.04173e-15	-0.940069	0.119	0.234	8.93293e-11	0.508547
Rims1	8.11062e-79	-1.03336	0.269	0.53	1.43704e-74	0.507547
Sort1	5.9406e-24	-0.328473	0.113	0.223	1.05255e-19	0.506726
Smc4	9.3568e-55	-0.869472	0.226	0.447	1.65784e-50	0.505593
Clspn	3.98025e-20	-0.316754	0.099	0.196	7.0522e-16	0.505102
Kif24	3.53957e-21	-0.32253	0.101	0.2	6.27142e-17	0.505
Srrm3	3.77125e-48	-0.690522	0.211	0.419	6.6819e-44	0.50358
Syt13	3.1891e-19	-0.353833	0.096	0.191	5.65045e-15	0.502618
Chd3	7.60024e-16	-0.250028	0.07	0.14	1.34661e-11	0.5
Hpca	2.21053e-26	-0.384698	0.115	0.231	3.91661e-22	0.497835
Celf4	4.36312e-115	-1.49581	0.324	0.651	7.73058e-111	0.497696
Adam23	9.08751e-16	-0.324524	0.09	0.181	1.61012e-11	0.497237
Sema6c	1.36014e-17	-0.264614	0.074	0.149	2.4099e-13	0.496644
Kcnc1	4.52023e-18	-0.351281	0.097	0.196	8.00894e-14	0.494898
Chrna3	4.38728e-15	-0.314053	0.069	0.14	7.77338e-11	0.492857
Tmem2	1.21538e-43	-0.71149	0.204	0.415	2.15342e-39	0.491566
Ptprr	3.08135e-07	-0.271519	0.058	0.118	0.00545954	0.491525
Atp9a	5.93061e-08	-0.309478	0.083	0.169	0.00105078	0.491124
Dlg2	3.01556e-43	-0.719129	0.163	0.332	5.34297e-39	0.490964
Mtmr4	2.46371e-16	-0.281435	0.08	0.163	4.3652e-12	0.490797
Syt9	3.10308e-12	-0.339022	0.078	0.159	5.49803e-08	0.490566
Arl6ip1	1.18642e-23	-0.436219	0.111	0.227	2.10209e-19	0.488987
Pard6g	4.97755e-12	-0.272957	0.071	0.146	8.81922e-08	0.486301
Dtna	4.87344e-15	-0.448771	0.106	0.218	8.63476e-11	0.486238
Myt1l	2.66433e-74	-1.04369	0.227	0.467	4.72066e-70	0.486081
Cd47	1.64091e-12	-0.252079	0.069	0.142	2.90736e-08	0.485915
Cadm3	2.21973e-44	-0.745007	0.177	0.365	3.93293e-40	0.484931
Tenm2	3.00482e-24	-0.570828	0.118	0.244	5.32394e-20	0.483606
Ska2	3.25058e-22	-0.283735	0.088	0.182	5.75939e-18	0.483516
Vav3	1.07923e-11	-0.29706	0.057	0.118	1.91218e-07	0.48305
Arid3a	3.20292e-18	-0.295724	0.078	0.162	5.67493e-14	0.481481
Kif5a	1.84143e-25	-0.454274	0.116	0.241	3.26264e-21	0.481328
Hunk	1.00757e-16	-0.367034	0.103	0.214	1.78522e-12	0.481308
Bard1	9.63293e-18	-0.286204	0.077	0.16	1.70676e-13	0.48125
Ncapg2	7.79562e-27	-0.402629	0.11	0.229	1.38123e-22	0.480349
Lbr	1.10638e-28	-0.404984	0.121	0.253	1.96028e-24	0.478261
Zfpm1	2.27052e-15	-0.266579	0.065	0.136	4.02292e-11	0.477941
Cenpk	2.0285e-18	-0.259489	0.064	0.134	3.5941e-14	0.477612
Cers6	7.45911e-28	-0.500023	0.123	0.258	1.3216e-23	0.476744
Kcnj6	3.5536e-75	-1.09032	0.252	0.529	6.29626e-71	0.47637
Ankrd44	1.51824e-55	-0.713145	0.211	0.444	2.69002e-51	0.475225
Grik1	9.23739e-21	-0.327819	0.065	0.137	1.63668e-16	0.474452
Ppp2r2b	6.13993e-50	-0.892082	0.16	0.338	1.08787e-45	0.473373
Pcdha11	3.90935e-32	-0.437919	0.106	0.224	6.92659e-28	0.473214
Cacna1a	3.56549e-31	-0.913595	0.147	0.311	6.31734e-27	0.472669
Epb41l1	6.36432e-37	-0.755116	0.131	0.278	1.12763e-32	0.471223
Nxph1	2.21504e-17	-0.389618	0.08	0.171	3.92461e-13	0.467836
Brip1	6.00785e-24	-0.350422	0.086	0.184	1.06447e-19	0.467391
Dnajc6	3.1339e-18	-0.317158	0.066	0.142	5.55265e-14	0.464788
Sphkap	1.56075e-40	-0.8221	0.177	0.381	2.76533e-36	0.464567
Slc17a6	2.65456e-56	-0.788043	0.201	0.434	4.70336e-52	0.463134
Pag1	8.55122e-36	-0.624874	0.153	0.333	1.5151e-31	0.459459
Gm20696	7.04492e-64	-0.931938	0.214	0.466	1.24822e-59	0.459227
Tubb2b	2.1267e-18	-0.285539	0.073	0.159	3.76809e-14	0.459119
Gm31409	9.96027e-24	-0.356045	0.081	0.177	1.76476e-19	0.457627
Tbc1d31	6.94743e-18	-0.271065	0.07	0.153	1.23095e-13	0.457516
Ina	2.76843e-15	-0.379527	0.088	0.193	4.90511e-11	0.455958
Nhlh2	3.90777e-29	-0.543071	0.127	0.279	6.92379e-25	0.455197
Rasgef1b	3.90351e-144	-1.48083	0.292	0.643	6.91624e-140	0.454121
Lrrtm3	1.92807e-15	-0.579766	0.073	0.161	3.41616e-11	0.453416
Rad54b	3.21911e-26	-0.334019	0.081	0.179	5.70361e-22	0.452514
Podxl2	6.50228e-41	-0.56521	0.127	0.281	1.15207e-36	0.451957
Map3k13	9.02922e-36	-0.661966	0.136	0.301	1.5998e-31	0.451827
Herc3	1.79725e-19	-0.338279	0.074	0.164	3.18437e-15	0.451219
Ccdc18	9.24788e-21	-0.361255	0.082	0.182	1.63854e-16	0.450549
Slc4a4	7.55092e-15	-0.464181	0.067	0.149	1.33787e-10	0.449664
Cdh18	2.25081e-16	-0.331838	0.051	0.114	3.98799e-12	0.447368
Kntc1	2.14454e-26	-0.435294	0.097	0.217	3.7997e-22	0.447004
Gap43	5.82146e-50	-0.755256	0.158	0.354	1.03145e-45	0.446328
Cdk5r1	9.90308e-22	-0.310511	0.065	0.146	1.75463e-17	0.445205
Syn3	2.63444e-42	-0.894541	0.13	0.293	4.6677e-38	0.443686
St6galnac3	8.0882e-38	-0.673897	0.133	0.301	1.43307e-33	0.44186
Mki67	3.54212e-115	-1.73445	0.242	0.548	6.27593e-111	0.441606
Mcf2l	8.27461e-29	-0.465184	0.098	0.222	1.46609e-24	0.441441
Ttbk1	2.33361e-24	-0.387267	0.09	0.204	4.13469e-20	0.441176
Rgs17	9.0965e-13	-0.275546	0.051	0.116	1.61172e-08	0.439655
Fstl5	2.27125e-19	-0.422298	0.082	0.188	4.02419e-15	0.43617
Ppp1r14c	4.20028e-59	-0.938405	0.177	0.406	7.44206e-55	0.43596
Slc7a14	1.37811e-21	-0.340399	0.068	0.156	2.44173e-17	0.435897
Ncapd2	1.36898e-49	-0.660364	0.147	0.338	2.42556e-45	0.434911
Kcnk10	7.50453e-25	-0.505302	0.092	0.212	1.32965e-20	0.433962
Arpp21	1.29166e-70	-1.5591	0.19	0.438	2.28856e-66	0.43379
Nrxn2	1.46983e-38	-0.589104	0.12	0.277	2.60425e-34	0.433213
Lingo1	2.55369e-23	-0.402016	0.071	0.164	4.52463e-19	0.432927
Rundc3b	9.99671e-16	-0.36264	0.071	0.164	1.77122e-11	0.432927
Lzts1	6.34758e-29	-0.545278	0.104	0.241	1.12466e-24	0.431535
E2f7	7.91836e-23	-0.458387	0.089	0.207	1.40298e-18	0.429951
St18	1.46815e-88	-1.14101	0.227	0.528	2.60127e-84	0.429924
Gm26953	4.62219e-32	-0.465826	0.092	0.216	8.18959e-28	0.425926
Lhfp	1.08498e-09	-0.409983	0.045	0.106	1.92237e-05	0.424528
Celf3	9.06047e-31	-0.538867	0.104	0.246	1.60533e-26	0.422764
Rad51ap1	2.31118e-16	-0.263163	0.053	0.126	4.09494e-12	0.420635
Gm13052	2.08921e-13	-0.3254	0.042	0.1	3.70166e-09	0.42
Pdgfra	5.76008e-17	-0.334549	0.06	0.143	1.02057e-12	0.41958
Snhg14	1.90751e-58	-0.99229	0.169	0.406	3.37973e-54	0.416256
Scrt2	2.38008e-31	-0.454231	0.082	0.198	4.21703e-27	0.414141
Atp8a2	8.71206e-20	-0.410782	0.065	0.157	1.5436e-15	0.414012
Prune2	1.02675e-19	-0.388757	0.057	0.138	1.8192e-15	0.413043
Prdm8	6.86772e-26	-0.367389	0.066	0.16	1.21682e-21	0.4125
Cep89	1.23611e-20	-0.341185	0.052	0.127	2.19014e-16	0.409448
Syp	6.35673e-20	-0.354014	0.063	0.154	1.12629e-15	0.409091
Diaph3	2.82253e-85	-1.18864	0.185	0.453	5.00096e-81	0.408388
Bora	3.34938e-22	-0.39881	0.071	0.174	5.93443e-18	0.408046
Serpini1	2.57453e-25	-0.36643	0.058	0.143	4.56156e-21	0.405594
Slc24a2	5.23406e-12	-0.327207	0.045	0.112	9.2737e-08	0.401785
Nhlh1	2.75313e-19	-0.436874	0.071	0.177	4.878e-15	0.40113
Vash1	1.16239e-27	-0.401283	0.072	0.18	2.05951e-23	0.4
Zwilch	3.26006e-14	-0.262215	0.048	0.12	5.77617e-10	0.4
Triobp	3.26359e-13	-0.25842	0.048	0.12	5.78243e-09	0.4
Tmem108	7.79002e-19	-0.342138	0.044	0.11	1.38024e-14	0.4
Hmgcll1	3.73255e-09	-0.286318	0.044	0.11	6.61333e-05	0.4
Pclaf	3.47734e-16	-0.392396	0.065	0.163	6.16116e-12	0.398773
Ticrr	1.21112e-19	-0.325287	0.059	0.148	2.14586e-15	0.398648
Arhgap33	5.04381e-30	-0.406078	0.077	0.194	8.93662e-26	0.396907
Gpr158	5.43086e-64	-0.934882	0.15	0.378	9.62239e-60	0.396825
Clvs1	3.85962e-108	-1.20334	0.212	0.535	6.83848e-104	0.396262
L3mbtl4	9.45211e-28	-0.617748	0.084	0.213	1.67472e-23	0.394366
Cntn2	2.21751e-134	-1.79099	0.217	0.555	3.92899e-130	0.390991
Rangap1	1.52476e-26	-0.449673	0.081	0.209	2.70157e-22	0.38756
Dpysl3	3.31247e-32	-0.54836	0.079	0.204	5.86903e-28	0.387255
Dpysl5	1.27336e-59	-0.78382	0.128	0.333	2.25614e-55	0.384384
Cacna1c	7.36485e-107	-1.59138	0.186	0.484	1.3049e-102	0.384297
Apba1	2.44215e-82	-1.08955	0.167	0.435	4.32701e-78	0.383908
Polq	7.00479e-38	-0.543169	0.093	0.243	1.24111e-33	0.382716
Cenpp	4.21254e-64	-1.01105	0.147	0.386	7.46378e-60	0.380829
Myt1	9.65997e-71	-0.93964	0.143	0.377	1.71155e-66	0.37931
Dscam	4.84714e-43	-0.818123	0.117	0.309	8.58816e-39	0.378641
Mns1	5.02742e-15	-0.259502	0.042	0.111	8.90759e-11	0.378378
Dner	8.36527e-85	-1.13997	0.177	0.469	1.48216e-80	0.377399
Fxyd6	6.05631e-39	-0.505458	0.081	0.216	1.07306e-34	0.375
Arhgap20	1.99599e-20	-0.349174	0.049	0.131	3.5365e-16	0.374046
Akap12	9.80944e-18	-0.314992	0.044	0.118	1.73804e-13	0.372881
Kcnq2	2.07941e-54	-0.668592	0.107	0.287	3.68429e-50	0.372822
Cyfip2	6.76066e-30	-0.511258	0.069	0.186	1.19785e-25	0.370968
St8sia2	6.62688e-23	-0.387501	0.055	0.149	1.17415e-18	0.369127
Prickle2	8.74827e-42	-0.73041	0.077	0.209	1.55002e-37	0.368421
Ncaph	5.79393e-20	-0.317915	0.053	0.144	1.02657e-15	0.368055
Mir124a-1hg	2.06823e-76	-0.951887	0.128	0.349	3.66448e-72	0.366762
Lurap1l	1.54601e-15	-0.303664	0.04	0.11	2.73923e-11	0.363636
Pid1	1.74601e-70	-0.941507	0.116	0.32	3.09359e-66	0.3625
Hmgb2	1.88782e-28	-0.410775	0.06	0.167	3.34484e-24	0.359281
Slc8a1	7.85334e-63	-0.808444	0.11	0.308	1.39146e-58	0.357143
Plk4	1.57532e-27	-0.372852	0.055	0.155	2.79115e-23	0.354838
Samd12	9.42322e-105	-1.67027	0.158	0.447	1.66961e-100	0.353467
Frmpd3	7.44928e-38	-0.618062	0.077	0.218	1.31986e-33	0.353211
Snap91	1.88502e-37	-0.598596	0.078	0.221	3.33988e-33	0.352941
Clstn2	4.5631e-16	-0.411647	0.047	0.134	8.0849e-12	0.350746
Stil	3.53655e-24	-0.394087	0.054	0.154	6.26605e-20	0.350649
Hist1h1e	3.96466e-27	-0.41046	0.055	0.157	7.02458e-23	0.350318
Fanci	2.22988e-17	-0.263215	0.036	0.103	3.9509e-13	0.349514
Kcnk1	2.35031e-25	-0.440673	0.054	0.156	4.16428e-21	0.346154
Map6	1.09883e-32	-0.544141	0.073	0.211	1.94691e-28	0.345971
Tanc2	5.38032e-18	-0.382447	0.04	0.116	9.53286e-14	0.344827
Gm20125	3.48003e-35	-0.634471	0.074	0.215	6.16592e-31	0.344186
Spock1	9.41908e-29	-0.703693	0.053	0.155	1.66887e-24	0.341935
Dpf3	3.91335e-15	-0.441801	0.039	0.115	6.93367e-11	0.33913
Cenpi	2.35292e-22	-0.338166	0.045	0.133	4.16891e-18	0.338346
Phactr3	1.96804e-24	-0.40357	0.046	0.136	3.48698e-20	0.338235
Ntrk2	4.55435e-39	-0.734557	0.074	0.219	8.06939e-35	0.337899
Dgki	1.67895e-82	-0.959856	0.133	0.394	2.97477e-78	0.337563
Nfasc	2.71672e-56	-0.829035	0.094	0.28	4.81349e-52	0.335714
Nrxn3	3.0527e-47	-1.3858	0.094	0.281	5.40877e-43	0.334519
Cpeb2	5.83974e-21	-0.357724	0.04	0.12	1.03469e-16	0.333333
Stmn4	8.28193e-30	-0.491776	0.055	0.168	1.46739e-25	0.327381
Celf5	1.51497e-30	-0.369622	0.041	0.128	2.68422e-26	0.320312
Sptb	1.05036e-18	-0.28947	0.032	0.101	1.86103e-14	0.316831
Top2a	9.14662e-106	-1.52094	0.138	0.436	1.6206e-101	0.316514
Pacsin1	1.57719e-16	-0.350555	0.035	0.111	2.79446e-12	0.315315
Racgap1	1.09385e-51	-0.653523	0.075	0.238	1.93809e-47	0.315126
Tspoap1	1.60991e-53	-0.794163	0.083	0.266	2.85243e-49	0.31203
Mmp24	1.23848e-48	-0.816102	0.083	0.267	2.19434e-44	0.310861
Dbf4	5.57121e-35	-0.379715	0.046	0.148	9.87106e-31	0.310811
Shf	4.44145e-19	-0.390041	0.041	0.132	7.86936e-15	0.310606
Kif18a	6.6572e-50	-0.620441	0.067	0.216	1.17952e-45	0.310185
Mapk4	2.13042e-37	-0.635677	0.062	0.201	3.77468e-33	0.308458
Unc5c	2.33845e-58	-1.47182	0.083	0.271	4.14326e-54	0.306273
Tubb3	3.55046e-27	-0.408663	0.042	0.138	6.29071e-23	0.304348
Pde9a	2.66554e-28	-0.406205	0.041	0.135	4.72281e-24	0.303703
Cenpf	3.43987e-82	-1.20095	0.097	0.32	6.09476e-78	0.303125
Kif20b	8.62049e-63	-0.928984	0.089	0.295	1.52738e-58	0.301695
Fancd2	1.38287e-22	-0.356035	0.038	0.126	2.45017e-18	0.301587
Efcab11	5.94113e-61	-0.810071	0.077	0.259	1.05265e-56	0.297297
Nol4l	5.35381e-31	-0.576206	0.049	0.166	9.48588e-27	0.295181
Kif21b	2.90652e-59	-0.798558	0.077	0.261	5.14977e-55	0.295019
Sept4	4.95573e-26	-0.422005	0.038	0.129	8.78057e-22	0.294573
Hcn1	3.04325e-38	-0.676914	0.05	0.17	5.39204e-34	0.294117
Cntn1	5.07953e-34	-0.700413	0.051	0.175	8.99991e-30	0.291428
Neurod1	2.74515e-79	-1.15413	0.102	0.351	4.86385e-75	0.290598
Cenpe	2.11757e-84	-1.24642	0.098	0.338	3.75191e-80	0.289941
Stmn2	1.24507e-78	-1.03133	0.097	0.335	2.20601e-74	0.289552
Pou2f2	1.48733e-35	-0.647934	0.06	0.208	2.63526e-31	0.288461
Pld5	1.34873e-25	-0.486011	0.035	0.122	2.38968e-21	0.286885
Srcin1	1.4471e-41	-0.638892	0.053	0.186	2.56397e-37	0.284946
Tacc3	2.90494e-33	-0.522487	0.05	0.178	5.14697e-29	0.280899
Ckap2	1.34735e-42	-0.499632	0.048	0.171	2.38723e-38	0.280702
Mastl	1.50803e-34	-0.423428	0.039	0.14	2.67192e-30	0.278571
Zmat4	1.94596e-38	-0.847482	0.046	0.169	3.44786e-34	0.272189
Cit	6.21121e-72	-0.971758	0.083	0.307	1.1005e-67	0.270358
Knl1	5.22083e-92	-1.16309	0.092	0.343	9.25026e-88	0.268221
Apc2	1.60627e-42	-0.572572	0.046	0.175	2.846e-38	0.262857
Lockd	1.3739e-55	-0.601048	0.052	0.198	2.43428e-51	0.262626
Gdpd5	8.01999e-30	-0.427007	0.029	0.112	1.42098e-25	0.258928
Rtkn2	3.44326e-41	-0.447094	0.038	0.149	6.10076e-37	0.255033
Mast1	5.26474e-31	-0.441154	0.032	0.127	9.32806e-27	0.251968
Kif15	1.91151e-82	-1.23677	0.09	0.362	3.38682e-78	0.248619
Hist1h1b	5.57866e-34	-0.51309	0.036	0.146	9.88428e-30	0.246575
Ryr2	4.99459e-40	-1.02417	0.044	0.18	8.84941e-36	0.244444
Aspm	5.49084e-81	-1.28824	0.076	0.311	9.72868e-77	0.244373
Ect2	1.53889e-62	-0.797778	0.058	0.238	2.72661e-58	0.243697
Neil3	7.49556e-63	-0.822848	0.058	0.24	1.32806e-58	0.241667
Incenp	1.27281e-65	-0.80564	0.06	0.25	2.25516e-61	0.24
Nyap2	2.83215e-76	-0.99648	0.066	0.279	5.018e-72	0.236559
Kif11	1.56091e-95	-1.24072	0.08	0.34	2.76562e-91	0.235294
Ndst3	6.81433e-69	-1.18367	0.063	0.271	1.20736e-64	0.232472
Foxm1	2.25478e-36	-0.431949	0.032	0.138	3.99502e-32	0.231884
Melk	3.4537e-24	-0.427205	0.031	0.134	6.11927e-20	0.231343
Anln	3.97706e-68	-0.767934	0.053	0.23	7.04655e-64	0.230435
Sgo1	1.78073e-31	-0.34951	0.026	0.113	3.1551e-27	0.230088
Ksr2	3.02782e-27	-0.442227	0.025	0.109	5.36469e-23	0.229358
Arhgap11a	1.11397e-45	-0.537553	0.038	0.168	1.97373e-41	0.22619
Sgo2a	3.86258e-39	-0.502174	0.034	0.151	6.84372e-35	0.225165
Runx1t1	3.6049e-31	-0.519893	0.026	0.116	6.38717e-27	0.224138
Mis18bp1	1.20668e-56	-0.779905	0.049	0.22	2.13799e-52	0.222727
Ttk	2.26061e-48	-0.554588	0.038	0.172	4.00535e-44	0.22093
Esco2	7.87969e-37	-0.480077	0.031	0.141	1.39612e-32	0.219858
Gm26871	9.36449e-31	-0.61168	0.03	0.137	1.6592e-26	0.218978
Ncapg	3.74259e-61	-0.669856	0.043	0.199	6.63111e-57	0.21608
Ckap2l	7.72961e-50	-0.579376	0.037	0.172	1.36953e-45	0.215116
Shcbp1	3.39422e-28	-0.377547	0.025	0.118	6.01387e-24	0.211864
Tpx2	2.5183e-67	-0.947336	0.054	0.256	4.46192e-63	0.210937
Ank1	4.67578e-39	-0.548095	0.028	0.134	8.28455e-35	0.208955
Kpna2	3.13936e-29	-0.394977	0.025	0.12	5.56232e-25	0.208333
Abcc8	1.3231e-32	-0.397217	0.021	0.102	2.34427e-28	0.205882
Nuf2	9.29662e-32	-0.478594	0.029	0.141	1.64717e-27	0.205674
Kif4	1.13748e-72	-0.927128	0.053	0.259	2.01539e-68	0.204633
Ccna2	2.55355e-27	-0.381647	0.023	0.113	4.52439e-23	0.20354
Nusap1	4.88888e-51	-0.607205	0.035	0.173	8.66212e-47	0.202312
Ephb1	9.02399e-79	-1.52663	0.055	0.272	1.59887e-74	0.202206
Dlgap5	2.45086e-38	-0.504218	0.028	0.14	4.34244e-34	0.2
Prr11	2.3802e-38	-0.437501	0.026	0.131	4.21725e-34	0.198473
Spag5	3.7767e-34	-0.531159	0.031	0.157	6.69156e-30	0.197452
March4	2.74876e-26	-0.464297	0.021	0.107	4.87025e-22	0.196261
Gabbr2	1.34648e-50	-0.925499	0.036	0.185	2.38569e-46	0.194594
Knstrn	1.28957e-42	-0.486619	0.027	0.139	2.28487e-38	0.194244
Bub1	3.54033e-57	-0.657311	0.036	0.188	6.27275e-53	0.191489
Cep55	2.23187e-29	-0.358378	0.02	0.105	3.95444e-25	0.190476
Ccnf	8.44449e-55	-0.572753	0.029	0.158	1.49619e-50	0.183544
Ndc80	1.81555e-46	-0.549312	0.029	0.158	3.21679e-42	0.183544
Grm1	3.84538e-41	-0.992167	0.028	0.157	6.81324e-37	0.178344
Gas2l3	1.90538e-35	-0.403686	0.019	0.109	3.37596e-31	0.174312
Espl1	2.38187e-38	-0.462929	0.023	0.132	4.2202e-34	0.174242
Kif18b	1.04249e-47	-0.563123	0.027	0.155	1.84709e-43	0.174193
Cdca2	2.75291e-82	-0.92769	0.042	0.243	4.87761e-78	0.172839
Cdk1	9.38154e-49	-0.512812	0.025	0.145	1.66222e-44	0.172414
Bub1b	5.22946e-49	-0.618825	0.029	0.171	9.26555e-45	0.169591
Prc1	1.0989e-63	-0.797114	0.034	0.203	1.94704e-59	0.167488
Parpbp	1.64219e-32	-0.460789	0.021	0.126	2.90963e-28	0.166667
Wscd2	1.29688e-60	-0.852442	0.031	0.189	2.29782e-56	0.164021
Iqgap3	1.08186e-50	-0.509752	0.023	0.141	1.91683e-46	0.16312
Kif23	1.62719e-68	-0.869543	0.034	0.216	2.88305e-64	0.157407
Aurkb	4.97925e-35	-0.388684	0.017	0.108	8.82223e-31	0.157407
Cdca8	1.782e-37	-0.358989	0.016	0.102	3.15735e-33	0.156863
Kif22	1.91481e-40	-0.486016	0.021	0.137	3.39266e-36	0.153285
Adamtsl3	3.58846e-78	-1.04949	0.032	0.209	6.35803e-74	0.15311
Cenpa	3.92447e-36	-0.465426	0.018	0.12	6.95337e-32	0.15
L1cam	6.19314e-39	-0.577509	0.018	0.126	1.0973e-34	0.142857
Depdc1b	4.51768e-54	-0.612831	0.022	0.158	8.00442e-50	0.13924
Troap	2.46277e-32	-0.417132	0.015	0.108	4.36354e-28	0.138889
Hmmr	1.59187e-54	-0.637129	0.022	0.159	2.82048e-50	0.138365
Depdc1a	1.13772e-43	-0.417714	0.015	0.109	2.01581e-39	0.137615
Kif2c	1.83988e-33	-0.381249	0.014	0.102	3.25991e-29	0.137255
Kif14	6.44294e-59	-0.703563	0.024	0.175	1.14156e-54	0.137143

## Sheet: cluster 3
	p_val	avg_log2FC	fraction + in cluster	fraction + not in cluster	p_val_adj	ratio + in:out of cluster
Obscn	3.24691e-71	1.27259	0.423	0.205	5.75287e-67	2.06341
Eln	1.14102e-33	0.978306	0.362	0.209	2.02166e-29	1.73206
Cyp11a1	0.00137589	0.365847	0.108	0.067	1	1.61194
Mroh2a	2.79529e-05	0.38231	0.12	0.077	0.495269	1.55844
Spock1	4.33835e-10	0.554533	0.204	0.138	7.68669e-06	1.47826
Asic1	7.22637e-06	0.327573	0.125	0.087	0.128037	1.43678
C1ql1	4.96436e-14	0.520177	0.255	0.179	8.79585e-10	1.42458
Spns2	0.000301243	0.335446	0.134	0.096	1	1.39583
Fbxo32	8.96871e-06	0.420398	0.191	0.137	0.158908	1.39416
Nrn1	2.67799e-15	0.555351	0.315	0.23	4.74486e-11	1.36956
Prune2	1.6676e-05	0.37663	0.169	0.125	0.295465	1.352
Fam210b	2.28205e-06	0.383886	0.173	0.131	0.0404334	1.32061
Slc17a6	2.37029e-24	0.63423	0.522	0.398	4.19967e-20	1.31156
Nkain1	2.84268e-16	0.565475	0.341	0.26	5.03665e-12	1.31154
Csrp1	7.90022e-06	0.375407	0.169	0.129	0.139976	1.31008
Lhx1	9.65058e-18	0.546392	0.383	0.301	1.70989e-13	1.27242
Cntn2	8.41343e-20	0.326699	0.644	0.508	1.49069e-15	1.26772
Igfbpl1	5.04808e-11	0.563648	0.408	0.322	8.94419e-07	1.26708
Arid3a	7.86413e-06	0.365876	0.189	0.15	0.139337	1.26
Chrna3	0.00079137	0.286948	0.162	0.129	1	1.25581
Srrm3	6.2868e-26	0.629422	0.487	0.388	1.1139e-21	1.25515
Tmem196	0.0370376	0.427004	0.217	0.175	1	1.24
Islr2	0.00649805	0.392458	0.231	0.187	1	1.23529
Schip1	4.13949e-07	0.505507	0.354	0.288	0.00733435	1.22917
Pdzrn3	0.00611254	0.361893	0.243	0.199	1	1.2211
Tspoap1	2.97028e-06	0.436391	0.295	0.242	0.0526274	1.21901
Enox2	3.08474e-19	0.706267	0.462	0.38	5.46555e-15	1.21579
Rcor2	3.12066e-06	0.388575	0.282	0.232	0.0552918	1.21552
Gm26953	5.46766e-06	0.373897	0.243	0.2	0.0968761	1.215
Cntnap1	1.5454e-11	0.568293	0.43	0.354	2.73814e-07	1.21469
Miat	4.68859e-94	0.74641	0.884	0.729	8.30724e-90	1.21262
Tmem163	7.84648e-54	0.804036	0.773	0.639	1.39024e-49	1.2097
Plppr1	3.54252e-33	0.56664	0.733	0.606	6.27663e-29	1.20957
Fgd3	0.0371257	0.256151	0.134	0.111	1	1.20721
Fam20c	0.0837818	0.25441	0.156	0.13	1	1.2
Lzts1	3.65165e-08	0.424035	0.267	0.223	0.000646999	1.19731
Slc29a1	1.41832e-18	0.517892	0.461	0.388	2.51297e-14	1.18814
Nek6	0.00341122	0.330422	0.209	0.176	1	1.1875
Plekha6	3.90093e-37	0.658544	0.671	0.566	6.91167e-33	1.18551
Sema7a	8.58249e-27	0.608861	0.609	0.515	1.52065e-22	1.18252
Barhl1	2.08792e-09	0.479919	0.471	0.399	3.69937e-05	1.18045
Sept9	0.0227702	0.315371	0.184	0.156	1	1.17949
Uncx	2.68922e-06	0.367449	0.282	0.24	0.0476477	1.175
Ltbp3	0.00218836	0.407872	0.272	0.232	1	1.17241
Adcy5	0.000984881	0.406296	0.279	0.238	1	1.17227
Lhx1os	1.14115e-06	0.427061	0.343	0.294	0.0202188	1.16667
Adarb2	2.82818e-33	0.667827	0.699	0.6	5.01097e-29	1.165
Dscaml1	1.7089e-23	0.550357	0.64	0.554	3.02784e-19	1.15523
Adgrg1	7.50987e-11	0.456889	0.41	0.355	1.3306e-06	1.15493
Brinp1	0.0156305	0.371419	0.254	0.221	1	1.14932
Srebf1	8.11328e-05	0.315242	0.225	0.196	1	1.14796
Ntn1	4.77786e-43	0.593651	0.779	0.679	8.46541e-39	1.14728
Lingo1	0.0197684	0.303013	0.175	0.153	1	1.14379
Zmynd8	3.50772e-16	0.534524	0.511	0.449	6.21499e-12	1.13808
Nnat	5.55822e-06	0.486294	0.373	0.328	0.0984805	1.13719
Kalrn	4.99961e-22	0.560763	0.598	0.527	8.85831e-18	1.13472
Elavl3	7.43646e-28	0.528961	0.682	0.602	1.31759e-23	1.13289
Tspan18	0.0293036	0.36336	0.235	0.208	1	1.12981
Dpysl4	2.99801e-08	0.40758	0.298	0.264	0.000531187	1.12879
Rassf4	2.66373e-12	0.459132	0.509	0.454	4.7196e-08	1.12115
Ccdc88c	0.000160619	0.375253	0.31	0.279	1	1.11111
Thsd7a	1.0861e-99	0.926782	0.92	0.829	1.92435e-95	1.10977
Rundc3a	0.0578697	0.27223	0.203	0.183	1	1.10929
Ypel2	0.0362667	0.269035	0.214	0.193	1	1.10881
Arhgef10l	1.32837e-05	0.389776	0.367	0.332	0.235361	1.10542
Zfp423	4.11076e-21	0.443686	0.593	0.537	7.28344e-17	1.10428
Pde1c	1.0753e-160	0.95212	0.96	0.872	1.90522e-156	1.10092
Dlg4	0.0145355	0.263061	0.214	0.195	1	1.09744
Crmp1	8.2486e-08	0.42358	0.508	0.463	0.00146149	1.09719
Gm38399	6.73202e-24	0.549281	0.73	0.666	1.19278e-19	1.0961
Cacng2	2.95669e-22	0.415622	0.722	0.659	5.23866e-18	1.0956
Kcnip3	0.0429239	0.341247	0.253	0.231	1	1.09524
Ckb	0.0624559	0.261505	0.207	0.189	1	1.09524
Man1c1	6.76079e-43	0.485186	0.844	0.774	1.19788e-38	1.09044
Kdm6b	0.0203841	0.322175	0.346	0.318	1	1.08805
Dgkz	0.000319987	0.284093	0.23	0.212	1	1.08491
Slc1a2	4.63265e-25	0.411859	0.681	0.628	8.20813e-21	1.08439
Pak7	6.9927e-13	0.367564	0.693	0.64	1.23897e-08	1.08281
Nova2	3.09014e-06	0.325066	0.406	0.375	0.054751	1.08267
Xkr6	1.92045e-13	0.386043	0.469	0.434	3.40266e-09	1.08064
Msi1	0.000794258	0.306508	0.286	0.265	1	1.07924
Col11a1	1.04943e-12	0.487044	0.536	0.499	1.85938e-08	1.07415
Mapk10	4.82646e-18	0.395025	0.667	0.622	8.55152e-14	1.07235
Slc39a11	0.000107625	0.460508	0.505	0.471	1	1.07219
Kcnq2	0.00716824	0.273342	0.286	0.267	1	1.07116
Fam214a	0.941457	0.270224	0.226	0.211	1	1.07109
Ddr1	0.000496733	0.307426	0.333	0.311	1	1.07074
Gse1	3.06747e-42	0.463792	0.905	0.848	5.43494e-38	1.06722
Eml5	8.85886e-10	0.377457	0.461	0.432	1.56961e-05	1.06713
Dab2ip	0.0112832	0.262447	0.257	0.241	1	1.06639
Ptprs	1.32819e-31	0.388292	0.848	0.796	2.35328e-27	1.06533
Cxxc5	0.139716	0.327343	0.343	0.324	1	1.05864
Mdga1	2.34262e-12	0.333873	0.719	0.68	4.15065e-08	1.05735
Btbd11	2.08605e-11	0.31676	0.705	0.667	3.69606e-07	1.05697
Prkag2	0.00191471	0.2778	0.271	0.257	1	1.05447
Ppp2r2c	8.55474e-20	0.383108	0.692	0.657	1.51573e-15	1.05327
Rab6b	6.35972e-05	0.296277	0.456	0.433	1	1.05312
Mvb12b	3.07121e-09	0.372233	0.568	0.54	5.44157e-05	1.05185
Atp2b2	0.000106175	0.346528	0.494	0.47	1	1.05106
Trak1	8.57521e-08	0.383027	0.556	0.529	0.00151936	1.05104
Nav1	7.21495e-59	0.494693	0.905	0.862	1.27834e-54	1.04988
Nhlh2	0.160613	0.253974	0.275	0.262	1	1.04962
Ebf3	3.19586e-33	0.404832	0.866	0.828	5.66242e-29	1.04589
Syn2	0.00206975	0.364321	0.392	0.375	1	1.04533
Cacna1b	2.80369e-06	0.26344	0.461	0.442	0.0496759	1.04299
Astn1	1.06767e-05	0.312066	0.534	0.512	0.189169	1.04297
Prkcb	1.07441e-22	0.360387	0.876	0.84	1.90364e-18	1.04286
Klf12	1.32963e-21	0.332249	0.864	0.833	2.35584e-17	1.03721
Apc	1.16223e-19	0.322244	0.812	0.783	2.05923e-15	1.03704
Ccbe1	0.0472387	0.348663	0.338	0.326	1	1.03681
Nav2	5.72494e-59	0.398921	0.994	0.959	1.01434e-54	1.0365
H13	0.144884	0.26857	0.298	0.288	1	1.03472
Zeb1	4.17224e-40	0.342817	0.978	0.946	7.39238e-36	1.03383
Cbfa2t3	6.17322e-06	0.259887	0.626	0.606	0.109377	1.033
Sipa1l3	2.05104e-09	0.310044	0.713	0.691	3.63403e-05	1.03184
Podxl2	0.107137	0.266324	0.273	0.265	1	1.03019
Tmem178b	4.03978e-18	0.372434	0.842	0.818	7.15768e-14	1.02934
Ncoa1	1.64227e-16	0.406266	0.67	0.651	2.90977e-12	1.02919
Hdac9	4.85735e-07	0.306707	0.724	0.704	0.00860625	1.02841
Maml3	2.50136e-35	0.41926	0.919	0.896	4.43192e-31	1.02567
Rab3c	0.00151362	0.290335	0.523	0.511	1	1.02348
Ank3	2.81306e-34	0.287237	0.967	0.945	4.98418e-30	1.02328
Celsr3	8.6833e-05	0.281402	0.443	0.433	1	1.02309
Ahdc1	1.2043e-07	0.314354	0.501	0.49	0.00213378	1.02245
Afap1	0.000195927	0.28202	0.449	0.44	1	1.02045
Akap6	6.9103e-97	0.53334	0.986	0.967	1.22437e-92	1.01965
Igdcc4	0.00751032	0.260882	0.422	0.414	1	1.01932
Rnf220	4.96178e-07	0.266691	0.725	0.712	0.00879128	1.01826
Bcar1	0.497164	0.256905	0.284	0.279	1	1.01792
Kif5c	4.04527e-12	0.258487	0.688	0.676	7.16741e-08	1.01775
Zfhx2	0.069245	0.266181	0.289	0.284	1	1.01761
Dapk1	3.13012e-12	0.322546	0.515	0.507	5.54595e-08	1.01578
Setbp1	1.57116e-49	0.356609	0.973	0.959	2.78379e-45	1.0146
Myo16	7.49651e-13	0.263086	0.855	0.844	1.32823e-08	1.01303
Ptprn2	0.00166641	0.291222	0.546	0.539	1	1.01299
Kcnh8	0.471334	0.25968	0.251	0.248	1	1.0121
Dcc	4.41904e-243	0.887067	1	0.989	7.82966e-239	1.01112
Elovl6	0.0336726	0.314271	0.364	0.36	1	1.01111
Pbx3	3.81317e-12	0.319177	0.868	0.859	6.75618e-08	1.01048
Ctif	3.99601e-09	0.266812	0.593	0.587	7.08013e-05	1.01022
Hs3st5	2.46134e-15	0.324677	0.819	0.811	4.36101e-11	1.00986
Dlgap3	0.00380959	0.258964	0.329	0.326	1	1.0092
Elavl4	0.0049743	0.251163	0.353	0.35	1	1.00857
Coro2b	3.59803e-09	0.292694	0.668	0.663	6.375e-05	1.00754
Celsr2	0.00126214	0.270491	0.417	0.414	1	1.00725
Mgll	0.29417	0.255835	0.202	0.201	1	1.00497
Mir9-3hg	0.00081626	0.255378	0.461	0.459	1	1.00436
Tox3	7.71075e-06	0.262871	0.687	0.685	0.136619	1.00292
Alcam	0.010097	0.28253	0.494	0.494	1	1
Msi2	2.7685e-11	0.254359	0.833	0.837	4.90523e-07	0.995221
Bcas3	0.00815564	0.251953	0.571	0.574	1	0.994773
Ctnnd2	2.88514e-16	0.255403	0.919	0.926	5.11189e-12	0.99244
Dennd2a	0.0132408	0.270207	0.487	0.491	1	0.991853
Heg1	1.29783e-06	0.253338	0.62	0.629	0.022995	0.985691
Nrxn1	1.01365e-11	-0.27697	0.911	0.931	1.79599e-07	0.978518
Lrba	0.000343149	0.250176	0.688	0.704	1	0.977273
Rbfox3	3.39111e-09	-0.273421	0.882	0.909	6.00837e-05	0.970297
Ank2	6.78874e-12	-0.299616	0.87	0.91	1.20283e-07	0.956044
Pde4d	2.74856e-30	-0.554533	0.836	0.899	4.86991e-26	0.929922
Ebf2	0.448545	0.261504	0.33	0.355	1	0.929577
Fam155a	1.18966e-32	-0.412788	0.848	0.914	2.10784e-28	0.92779
Rbfox1	6.43534e-36	-0.656658	0.767	0.848	1.14021e-31	0.904481
Nedd4l	4.68493e-16	-0.25527	0.727	0.816	8.30076e-12	0.890931
Ptch1	4.6375e-43	-0.621639	0.741	0.833	8.21672e-39	0.889556
Celf4	1.6345e-08	-0.46729	0.552	0.625	0.0002896	0.8832
Mgat4c	0.166907	0.343615	0.25	0.286	1	0.874126
Aff3	1.34131e-15	-0.28493	0.656	0.776	2.37654e-11	0.845361
Stag1	3.01163e-18	-0.299411	0.659	0.783	5.33601e-14	0.841635
Ntm	1.10913e-12	-0.374756	0.557	0.663	1.96516e-08	0.840121
Rasgef1b	1.16068e-09	-0.378669	0.507	0.618	2.05649e-05	0.820388
Zfp704	6.62312e-22	-0.33876	0.584	0.714	1.17348e-17	0.817927
Macrod2	3.68113e-14	-0.306537	0.591	0.723	6.52222e-10	0.817427
Grid2	4.72374e-27	-0.467138	0.586	0.72	8.36953e-23	0.813889
March1	4.41221e-09	-0.277685	0.477	0.591	7.81755e-05	0.807106
Cux1	6.09463e-15	-0.269571	0.568	0.704	1.07985e-10	0.806818
Nrg1	2.28399e-08	-0.530484	0.389	0.484	0.000404678	0.803719
Tead1	1.05387e-13	-0.315079	0.576	0.718	1.86724e-09	0.802228
Opcml	8.61959e-08	-0.316283	0.358	0.453	0.00152722	0.790287
Xist	4.17985e-14	-0.440483	0.344	0.436	7.40587e-10	0.788991
Nsd2	4.54221e-18	-0.275702	0.521	0.662	8.04788e-14	0.787009
St18	8.05397e-09	-0.282838	0.398	0.508	0.0001427	0.783464
Cdk14	8.12455e-26	-0.381539	0.573	0.734	1.43951e-21	0.780654
Sorbs1	6.07767e-20	-0.402245	0.473	0.612	1.07684e-15	0.772876
Zfpm2	9.23875e-51	-1.09563	0.556	0.722	1.63692e-46	0.770083
Stxbp5l	4.17805e-08	-0.363197	0.388	0.504	0.000740266	0.769841
Samd12	2.59213e-14	-0.52604	0.325	0.428	4.59274e-10	0.759346
Qk	4.87968e-16	-0.291521	0.457	0.605	8.64581e-12	0.755372
Cntnap2	3.72189e-25	-0.520864	0.472	0.626	6.59444e-21	0.753993
Adgrl3	1.48108e-23	-0.420162	0.508	0.675	2.62418e-19	0.752592
Lrig3	9.96966e-18	-0.29755	0.39	0.519	1.76642e-13	0.751445
Apba1	8.18688e-11	-0.293805	0.314	0.418	1.45055e-06	0.751196
Msra	2.10878e-10	-0.381964	0.368	0.493	3.73633e-06	0.74645
Mast2	6.07319e-14	-0.253542	0.397	0.532	1.07605e-09	0.74624
Nkain3	3.55996e-15	-0.323778	0.44	0.591	6.30754e-11	0.744501
Atp2b1	2.65295e-18	-0.254496	0.394	0.531	4.70049e-14	0.741996
Tspan5	1.7956e-23	-0.359873	0.462	0.623	3.18145e-19	0.741573
Smchd1	1.93694e-10	-0.251933	0.394	0.532	3.43187e-06	0.740601
Sh3gl2	5.20497e-16	-0.39423	0.425	0.577	9.22216e-12	0.736568
Pola1	1.89482e-16	-0.336679	0.393	0.537	3.35725e-12	0.731843
Fgf13	2.72839e-17	-0.459631	0.446	0.61	4.83416e-13	0.731147
Zfp521	6.43666e-36	-0.693654	0.514	0.704	1.14045e-31	0.730114
Egfem1	4.75199e-10	-0.288621	0.362	0.496	8.41958e-06	0.729839
Tmtc2	6.12621e-18	-0.555506	0.427	0.588	1.08544e-13	0.72619
Ezh2	1.01131e-19	-0.301072	0.408	0.562	1.79184e-15	0.725979
Rbms1	8.29589e-14	-0.348182	0.422	0.582	1.46987e-09	0.725086
Irs1	1.13573e-17	-0.394951	0.389	0.539	2.01228e-13	0.721707
Cdk19	1.30468e-15	-0.265583	0.358	0.497	2.31164e-11	0.720322
Ptch2	8.33516e-13	-0.323139	0.35	0.486	1.47682e-08	0.720164
Unc5d	5.01029e-08	-0.322046	0.162	0.226	0.000887724	0.716814
Npas3	1.97973e-10	-0.288564	0.335	0.468	3.50768e-06	0.715812
Synpr	2.08095e-10	-0.318607	0.258	0.361	3.68703e-06	0.714681
Nell2	2.04283e-12	-0.309867	0.408	0.571	3.61948e-08	0.714536
Cbx5	1.6229e-22	-0.379258	0.405	0.568	2.87545e-18	0.713028
Pde4b	5.16946e-18	-0.285637	0.375	0.528	9.15925e-14	0.710227
Nasp	1.21799e-21	-0.304507	0.35	0.493	2.15803e-17	0.709939
Cacna2d3	5.12511e-12	-0.343044	0.288	0.406	9.08067e-08	0.709359
Pard3b	4.17227e-24	-0.459574	0.401	0.566	7.39242e-20	0.70848
Kcnj3	1.52404e-17	-0.503807	0.393	0.562	2.70029e-13	0.699288
Dlgap1	7.24944e-30	-0.530963	0.43	0.617	1.28446e-25	0.69692
Tle4	2.19584e-17	-0.262532	0.298	0.428	3.89059e-13	0.696262
Diaph2	4.96561e-16	-0.272392	0.302	0.434	8.79807e-12	0.695852
Galnt13	2.3279e-16	-0.2941	0.264	0.38	4.12458e-12	0.694737
Scaper	3.03802e-06	-0.255563	0.28	0.404	0.0538276	0.693069
Lpin2	8.06889e-13	-0.253824	0.26	0.376	1.42965e-08	0.691489
Mmp24	4.7984e-09	-0.265328	0.176	0.256	8.50181e-05	0.6875
Klhl29	4.04214e-40	-0.827381	0.443	0.645	7.16187e-36	0.686822
Farp1	1.30732e-13	-0.278143	0.288	0.423	2.31631e-09	0.680851
Jun	3.17127e-14	-0.253106	0.215	0.318	5.61886e-10	0.6761
Nrxn3	2.14963e-11	-0.601073	0.183	0.271	3.80872e-07	0.675277
Tgfb2	2.26455e-10	-0.254011	0.232	0.345	4.01232e-06	0.672464
Sptbn1	8.25445e-24	-0.464697	0.359	0.535	1.46252e-19	0.671028
Camk2d	4.04362e-17	-0.402413	0.267	0.399	7.16448e-13	0.669173
Ghr	1.18001e-09	-0.30125	0.188	0.281	2.09074e-05	0.669039
Asxl1	1.27366e-14	-0.320661	0.285	0.426	2.25666e-10	0.669014
Fry	3.72777e-38	-0.490154	0.406	0.609	6.60486e-34	0.666667
Brd8	3.41908e-19	-0.329096	0.286	0.431	6.05792e-15	0.663573
Cdk5rap2	3.35297e-25	-0.457338	0.336	0.507	5.9408e-21	0.662722
Dclk1	5.82801e-41	-0.562123	0.426	0.645	1.03261e-36	0.660465
Trpm3	5.26078e-11	-0.334512	0.141	0.214	9.32106e-07	0.658878
Rps6ka3	2.32967e-12	-0.400691	0.267	0.406	4.12771e-08	0.657635
Cntln	6.71692e-18	-0.305649	0.242	0.37	1.1901e-13	0.654054
Nr3c2	9.94271e-18	-0.389014	0.251	0.384	1.76165e-13	0.653646
Cbfb	2.16577e-14	-0.254612	0.212	0.326	3.83731e-10	0.650307
Smc6	1.53974e-14	-0.267885	0.24	0.371	2.72811e-10	0.6469
Mcph1	1.90228e-19	-0.330722	0.264	0.409	3.37045e-15	0.645477
Nhsl1	4.68252e-15	-0.293149	0.233	0.361	8.2965e-11	0.645429
Antxr2	5.1014e-15	-0.266651	0.235	0.366	9.03866e-11	0.642076
Ubash3b	8.14494e-15	-0.377983	0.21	0.331	1.44312e-10	0.634441
Cacnb4	7.98581e-11	-0.314348	0.156	0.246	1.41493e-06	0.634146
Rgs20	1.99302e-22	-0.382305	0.264	0.417	3.53123e-18	0.633093
Tnfaip8	1.71406e-12	-0.295394	0.182	0.288	3.03696e-08	0.631944
Mtss1	2.35487e-40	-0.714174	0.375	0.594	4.17235e-36	0.631313
Whrn	3.94434e-14	-0.386825	0.206	0.327	6.98858e-10	0.629969
Dtl	6.95385e-15	-0.260304	0.17	0.27	1.23208e-10	0.629629
Prim2	5.92744e-24	-0.30651	0.208	0.331	1.05022e-19	0.628399
Slc1a3	3.71071e-19	-0.376427	0.246	0.392	6.57464e-15	0.627551
Car10	5.66163e-10	-0.762542	0.126	0.201	1.00313e-05	0.626865
Ncapd3	5.13104e-20	-0.325513	0.219	0.351	9.09118e-16	0.623931
Frmd4b	7.45123e-109	-1.08406	0.479	0.769	1.32021e-104	0.622887
Nxn	2.58402e-17	-0.262906	0.175	0.281	4.57836e-13	0.622776
Nucks1	4.69569e-26	-0.372988	0.232	0.375	8.31982e-22	0.618667
Ano6	1.25612e-16	-0.270166	0.193	0.313	2.22559e-12	0.616613
Slc24a3	9.79121e-10	-0.275101	0.128	0.208	1.73481e-05	0.615384
Dock10	1.35296e-17	-0.290914	0.153	0.249	2.39717e-13	0.614458
Nkd1	5.26311e-18	-0.404777	0.256	0.417	9.32517e-14	0.613909
Cacna1c	2.72241e-33	-0.932483	0.289	0.471	4.82357e-29	0.613588
Fgf14	4.2137e-25	-1.08425	0.202	0.33	7.46583e-21	0.612121
Pag1	1.79865e-20	-0.305756	0.2	0.327	3.18685e-16	0.611621
Hivep3	1.91879e-26	-0.795098	0.25	0.409	3.39972e-22	0.611247
Cenpc1	2.20889e-14	-0.301011	0.196	0.321	3.91371e-10	0.610592
Gpr153	6.84494e-15	-0.278548	0.161	0.264	1.21279e-10	0.609848
Slc7a1	2.95754e-15	-0.271389	0.151	0.248	5.24018e-11	0.608871
Sae1	2.75234e-18	-0.278097	0.175	0.288	4.8766e-14	0.607639
Abr	3.32811e-15	-0.250516	0.144	0.237	5.89675e-11	0.607595
Mob3b	1.01467e-10	-0.274872	0.145	0.239	1.79779e-06	0.606694
Neurod1	8.31353e-16	-0.547261	0.205	0.338	1.47299e-11	0.606509
Atad5	9.95546e-16	-0.323209	0.193	0.319	1.76391e-11	0.605015
Cntrl	2.30482e-15	-0.391656	0.193	0.319	4.08369e-11	0.605015
Syt1	8.48501e-15	-0.428885	0.121	0.2	1.50337e-10	0.605
Gabbr2	3.42046e-13	-0.348542	0.107	0.177	6.06037e-09	0.604519
Mical3	1.32042e-19	-0.278946	0.175	0.29	2.33952e-15	0.603448
Gpc6	3.81357e-72	-0.994367	0.363	0.602	6.75688e-68	0.60299
Ptprk	9.39411e-39	-0.540726	0.333	0.553	1.66445e-34	0.60217
Airn	1.24979e-23	-0.409937	0.214	0.357	2.21438e-19	0.59944
Topbp1	3.97471e-19	-0.25449	0.157	0.262	7.0424e-15	0.599236
Oxr1	1.48314e-11	-0.323629	0.143	0.239	2.62783e-07	0.598326
Dpysl3	4.28914e-16	-0.298691	0.119	0.199	7.59949e-12	0.59799
Pde10a	1.47961e-25	-0.400491	0.184	0.31	2.62158e-21	0.593548
Grin2b	9.81084e-34	-0.943508	0.268	0.452	1.73829e-29	0.59292
Tmpo	5.36622e-32	-0.515349	0.265	0.447	9.50787e-28	0.592841
Utrn	1.1439e-23	-0.336848	0.198	0.334	2.02677e-19	0.592814
Slc8a1	2.20512e-21	-0.336839	0.177	0.3	3.90703e-17	0.59
Zfp385b	1.00518e-52	-0.78235	0.32	0.543	1.78099e-48	0.589318
Dek	6.88978e-23	-0.401187	0.217	0.369	1.22073e-18	0.588076
Cadm2	8.02778e-63	-1.47277	0.324	0.552	1.42236e-58	0.586956
Il1rapl1	2.03383e-34	-0.607391	0.278	0.477	3.60354e-30	0.582809
Mthfd1l	1.10561e-20	-0.345373	0.178	0.306	1.95893e-16	0.581699
Egfr	4.00682e-50	-0.665832	0.302	0.52	7.09928e-46	0.580769
Brca2	4.03271e-18	-0.270563	0.141	0.243	7.14515e-14	0.580247
Ppm1h	6.77126e-25	-0.703704	0.203	0.35	1.19973e-20	0.58
Mapt	2.26553e-17	-0.339045	0.139	0.24	4.01406e-13	0.579166
Galnt2	4.33e-29	-0.389742	0.185	0.32	7.67189e-25	0.578125
Anp32e	2.16567e-18	-0.258389	0.144	0.25	3.83714e-14	0.576
Mms22l	1.36606e-19	-0.319986	0.18	0.313	2.42038e-15	0.57508
Samd4	6.21872e-13	-0.276955	0.108	0.188	1.10183e-08	0.574468
Ccnd1	1.36278e-29	-0.470839	0.222	0.387	2.41457e-25	0.573643
Odf2	1.55251e-15	-0.280282	0.15	0.262	2.75074e-11	0.572519
Dlg2	6.50594e-25	-0.555198	0.188	0.329	1.15272e-20	0.571428
Itpr1	1.20521e-18	-0.321478	0.164	0.287	2.13538e-14	0.571428
Anp32b	9.5542e-16	-0.271255	0.138	0.242	1.69281e-11	0.570248
Mettl15	9.9235e-16	-0.265991	0.129	0.227	1.75824e-11	0.568282
Nxph1	3.92165e-11	-0.251814	0.096	0.169	6.94837e-07	0.568047
Pcdh7	5.30945e-34	-0.541376	0.213	0.375	9.40728e-30	0.568
Ptprj	2.60659e-13	-0.345626	0.123	0.218	4.61835e-09	0.56422
Arpp21	1.72779e-47	-1.25771	0.243	0.431	3.06131e-43	0.563805
Stxbp6	5.9993e-30	-0.475746	0.224	0.398	1.06296e-25	0.562814
Lmnb1	7.6694e-28	-0.48472	0.226	0.405	1.35886e-23	0.558025
St6galnac3	1.0221e-29	-0.413247	0.165	0.297	1.81096e-25	0.555555
Grb10	3.255e-17	-0.311832	0.118	0.213	5.76721e-13	0.55399
Wwc1	7.54309e-14	-0.309283	0.108	0.196	1.33648e-09	0.55102
Ckap5	4.53305e-53	-0.698156	0.251	0.456	8.03165e-49	0.550438
Syn3	4.8482e-20	-0.668982	0.159	0.289	8.59003e-16	0.550173
Ntrk2	1.00285e-11	-0.418064	0.117	0.213	1.77685e-07	0.549296
Terf1	1.31319e-15	-0.264312	0.116	0.212	2.3267e-11	0.54717
Hk2	1.75016e-14	-0.261079	0.104	0.191	3.10093e-10	0.544502
Arid5b	1.04411e-12	-0.25878	0.086	0.158	1.84996e-08	0.544303
Bcl2	5.27313e-17	-0.264717	0.107	0.197	9.34293e-13	0.543147
Lbr	2.83137e-22	-0.295032	0.136	0.251	5.01662e-18	0.541832
Nhs	1.39347e-41	-0.59773	0.208	0.384	2.46895e-37	0.541667
Tenm2	1.55758e-15	-0.471529	0.131	0.242	2.75972e-11	0.541322
Rad21	5.65234e-33	-0.523136	0.21	0.388	1.00148e-28	0.541237
Ror2	1.40458e-32	-0.4349	0.158	0.292	2.48864e-28	0.541096
Ankrd44	1.90669e-29	-0.542855	0.238	0.44	3.37828e-25	0.540909
Pcdh9	9.6958e-52	-1.0546	0.264	0.49	1.7179e-47	0.538775
Cep152	6.67722e-17	-0.276128	0.119	0.221	1.18307e-12	0.538461
Fbxl7	7.32056e-11	-0.313729	0.086	0.16	1.29706e-06	0.5375
Gab1	4.09038e-44	-0.601966	0.226	0.421	7.24734e-40	0.536817
Nectin3	6.09063e-22	-0.369743	0.155	0.289	1.07914e-17	0.536332
Pole	2.10939e-20	-0.284439	0.112	0.209	3.73742e-16	0.535885
Blm	1.23255e-22	-0.354698	0.143	0.267	2.18383e-18	0.53558
Tmtc1	8.95406e-31	-0.497181	0.169	0.316	1.58648e-26	0.53481
Gli1	4.38199e-21	-0.393629	0.152	0.285	7.76401e-17	0.533333
Zgrf1	2.54123e-17	-0.334994	0.137	0.257	4.50256e-13	0.533074
Zranb3	1.4379e-19	-0.267459	0.102	0.192	2.54767e-15	0.53125
Epb41l4b	2.62658e-21	-0.354881	0.111	0.209	4.65377e-17	0.5311
G2e3	4.71855e-36	-0.56671	0.194	0.367	8.36032e-32	0.52861
Thsd7b	3.98263e-13	-0.407878	0.074	0.14	7.05642e-09	0.528571
Cplx2	1.6326e-27	-0.436093	0.169	0.32	2.89263e-23	0.528125
Sema3e	2.89184e-22	-0.383927	0.132	0.25	5.12376e-18	0.528
Cadps2	1.01938e-56	-1.21335	0.256	0.485	1.80614e-52	0.527835
Tenm3	4.44062e-39	-0.619583	0.194	0.37	7.86789e-35	0.524324
Cep112	2.53044e-20	-0.366469	0.131	0.25	4.48343e-16	0.524
Pcx	1.44317e-21	-0.345764	0.112	0.214	2.55701e-17	0.523364
Fam19a5	3.02487e-38	-0.597918	0.196	0.375	5.35946e-34	0.522667
Csmd2	4.95681e-14	-0.432144	0.117	0.224	8.78247e-10	0.522321
Prkce	1.02548e-48	-0.765364	0.247	0.473	1.81695e-44	0.522199
Flnb	6.95667e-19	-0.288031	0.104	0.2	1.23258e-14	0.52
Kctd8	2.00931e-12	-0.534377	0.145	0.279	3.56009e-08	0.519713
Dab1	2.42043e-14	-0.289424	0.066	0.127	4.28851e-10	0.519685
Fgfr1	2.31788e-14	-0.259574	0.094	0.181	4.10682e-10	0.519337
Rapgef4	2.92674e-18	-0.294868	0.081	0.156	5.18559e-14	0.51923
Epb41l1	1.56426e-20	-0.662503	0.143	0.276	2.77155e-16	0.518116
Cacna1a	7.70236e-30	-0.853448	0.16	0.309	1.3647e-25	0.517799
Cdh8	1.11953e-24	-0.617059	0.18	0.348	1.98358e-20	0.517241
Smc4	1.13206e-52	-0.82065	0.23	0.446	2.00578e-48	0.515695
Rad18	4.09274e-22	-0.329546	0.119	0.232	7.25152e-18	0.512931
Prdm8	3.26617e-12	-0.271519	0.081	0.158	5.78699e-08	0.512658
Lin7a	3.16836e-09	-0.273892	0.064	0.125	5.61369e-05	0.512
Ctdspl	1.00323e-19	-0.314279	0.095	0.186	1.77753e-15	0.510752
Adamts14	6.36335e-25	-0.480346	0.146	0.286	1.12746e-20	0.510489
Rasa3	1.63715e-22	-0.301524	0.092	0.181	2.90071e-18	0.508287
Rad51b	2.79866e-49	-0.748659	0.207	0.408	4.95866e-45	0.507353
Egr1	1.09438e-21	-0.397951	0.112	0.221	1.93903e-17	0.506787
Dusp10	1.29805e-17	-0.262085	0.077	0.152	2.29989e-13	0.506579
Ccdc34	4.55454e-20	-0.298077	0.11	0.218	8.06974e-16	0.504587
Hpca	8.53485e-20	-0.405939	0.116	0.23	1.5122e-15	0.504348
Gm26871	5.06667e-14	-0.311404	0.067	0.133	8.97713e-10	0.503759
St8sia2	3.77161e-15	-0.260529	0.074	0.147	6.68255e-11	0.503401
Myo1e	9.00153e-21	-0.316841	0.102	0.203	1.59489e-16	0.502463
Ppp1r14c	2.25472e-43	-0.734955	0.202	0.403	3.99492e-39	0.501241
Pkp4	1.94029e-52	-0.752801	0.226	0.452	3.4378e-48	0.5
Cep128	1.63804e-42	-0.635537	0.201	0.402	2.90228e-38	0.5
Cep192	4.08513e-35	-0.466724	0.159	0.32	7.23804e-31	0.496875
Slco3a1	1.03863e-17	-0.277004	0.076	0.153	1.84024e-13	0.496732
Myo10	4.37723e-37	-0.556111	0.186	0.375	7.75558e-33	0.496
Prkd1	4.14617e-37	-0.65975	0.174	0.351	7.34619e-33	0.495726
Dtna	1.23441e-23	-0.442482	0.107	0.217	2.18713e-19	0.493087
Epha3	9.1471e-22	-0.384273	0.099	0.201	1.62068e-17	0.492537
Rbl1	4.13607e-15	-0.277708	0.097	0.197	7.32828e-11	0.492386
Kcnq3	4.1222e-51	-0.703239	0.203	0.414	7.30372e-47	0.490338
Sorcs2	6.65798e-38	-0.653148	0.153	0.314	1.17966e-33	0.487261
Elmo1	4.10097e-58	-0.928078	0.203	0.417	7.26611e-54	0.48681
Mdc1	2.94821e-23	-0.294217	0.097	0.2	5.22363e-19	0.485
Col4a2	5.79013e-23	-0.451538	0.088	0.182	1.0259e-18	0.483516
Adcy2	1.76571e-21	-0.430757	0.089	0.187	3.12849e-17	0.475936
Cacna1e	2.31645e-36	-1.1624	0.143	0.301	4.10429e-32	0.475083
Kcnab1	1.86068e-17	-0.278138	0.074	0.156	3.29676e-13	0.474359
Cnksr3	6.88985e-17	-0.333755	0.077	0.163	1.22074e-12	0.472392
Tenm1	1.46718e-30	-0.646508	0.109	0.231	2.59955e-26	0.471861
Atad2	6.49002e-32	-0.586535	0.156	0.331	1.1499e-27	0.471299
Sel1l3	9.26993e-18	-0.349686	0.076	0.162	1.64245e-13	0.469136
Lama2	1.01209e-25	-0.591506	0.118	0.252	1.79322e-21	0.468254
Ska2	8.61234e-20	-0.313584	0.085	0.182	1.52593e-15	0.467033
Asic2	4.02273e-20	-0.865004	0.068	0.146	7.12748e-16	0.465753
Mki67	3.65513e-107	-1.56963	0.254	0.546	6.47615e-103	0.465201
Fos	1.48148e-11	-0.314445	0.065	0.14	2.62488e-07	0.464285
Vat1l	1.06362e-23	-0.420727	0.083	0.179	1.88452e-19	0.463687
Gm48530	3.78296e-19	-0.338289	0.076	0.164	6.70264e-15	0.463414
Rgma	1.32873e-36	-0.486029	0.117	0.255	2.35424e-32	0.458823
Rrm1	2.58231e-27	-0.340352	0.091	0.199	4.57533e-23	0.457286
Fat1	5.52016e-30	-0.516954	0.122	0.267	9.78063e-26	0.456929
Cdh18	1.21006e-16	-0.302766	0.052	0.114	2.14399e-12	0.45614
Mctp1	2.18294e-27	-0.492458	0.087	0.191	3.86774e-23	0.455497
Fat3	2.83648e-52	-0.885397	0.189	0.415	5.02567e-48	0.455422
Kcnma1	2.80979e-47	-0.907004	0.167	0.367	4.97838e-43	0.455041
Ptn	1.34671e-31	-0.571073	0.145	0.319	2.3861e-27	0.454545
Kcnk1	7.27465e-17	-0.337401	0.07	0.154	1.28892e-12	0.454545
Fosb	4.85465e-34	-0.687717	0.133	0.294	8.60147e-30	0.452381
Hs6st2	2.32604e-24	-0.303154	0.064	0.142	4.12128e-20	0.450704
Syne1	7.9247e-31	-0.831866	0.111	0.247	1.4041e-26	0.449393
Arhgap26	7.48445e-23	-0.463067	0.079	0.176	1.32609e-18	0.448863
Adgrv1	5.51484e-13	-0.314891	0.055	0.123	9.7712e-09	0.447154
Hs6st3	1.22148e-67	-1.23721	0.224	0.503	2.16421e-63	0.445328
Grik1	2.81047e-19	-0.36574	0.061	0.137	4.97959e-15	0.445255
Lama5	1.53867e-30	-0.587576	0.105	0.236	2.72621e-26	0.444915
Ndc1	9.54759e-25	-0.288026	0.068	0.153	1.69164e-20	0.444444
Chrm3	1.23571e-30	-0.548729	0.074	0.167	2.18942e-26	0.443114
Ncapd2	3.61873e-44	-0.60621	0.148	0.337	6.41166e-40	0.439169
Sept8	1.73905e-17	-0.350603	0.072	0.164	3.08126e-13	0.439024
Mdga2	3.29566e-47	-0.842585	0.151	0.344	5.83925e-43	0.438953
Kcnd2	6.95207e-40	-1.3308	0.111	0.254	1.23177e-35	0.437008
Kcnq5	4.70538e-110	-1.57245	0.241	0.552	8.337e-106	0.436594
Kif24	3.63985e-32	-0.379895	0.087	0.201	6.44909e-28	0.432836
Cenpk	4.17927e-15	-0.268635	0.058	0.134	7.40483e-11	0.432835
Smc2	9.86842e-81	-1.02792	0.207	0.48	1.74849e-76	0.43125
Lrp1b	1.59286e-28	-0.89011	0.082	0.191	2.82224e-24	0.429319
Notch2	2.79623e-28	-0.413369	0.091	0.212	4.95436e-24	0.429245
Cep89	1.02246e-13	-0.318494	0.054	0.126	1.81159e-09	0.428571
Spats2l	4.08686e-20	-0.31028	0.056	0.131	7.2411e-16	0.427481
Rangap1	1.40289e-30	-0.387389	0.088	0.207	2.48564e-26	0.425121
Runx1t1	6.16945e-14	-0.353897	0.048	0.113	1.0931e-09	0.424778
Adamts19	5.42101e-14	-0.32589	0.048	0.114	9.60494e-10	0.421052
Col4a1	1.1419e-24	-0.491315	0.076	0.181	2.02322e-20	0.419889
Pdlim3	9.19826e-63	-1.05062	0.166	0.396	1.62975e-58	0.419192
Disc1	1.13994e-16	-0.344785	0.064	0.153	2.01975e-12	0.4183
Ncam2	1.25566e-25	-0.55005	0.075	0.18	2.22479e-21	0.416666
Angpt1	1.42487e-21	-0.444013	0.065	0.157	2.52459e-17	0.414012
Ror1	5.44234e-65	-0.973414	0.168	0.406	9.64274e-61	0.413793
Adamts20	1.41371e-39	-0.598958	0.11	0.267	2.50482e-35	0.411985
Rad54b	1.89849e-27	-0.377967	0.074	0.18	3.36374e-23	0.411111
Bard1	2.20578e-20	-0.323083	0.066	0.161	3.90821e-16	0.409938
Srgap1	1.08342e-21	-0.410322	0.072	0.176	1.9196e-17	0.409091
Ncapg2	2.98151e-28	-0.495245	0.094	0.23	5.28263e-24	0.408695
Arl6ip1	1.28135e-36	-0.553716	0.093	0.228	2.2703e-32	0.407895
Sgcd	1.88044e-74	-1.23127	0.18	0.442	3.33176e-70	0.40724
Brca1	3.35565e-32	-0.494139	0.09	0.222	5.94554e-28	0.405405
Rad51ap1	8.48741e-22	-0.266435	0.051	0.126	1.5038e-17	0.404762
Racgap1	6.11214e-26	-0.482394	0.095	0.235	1.08295e-21	0.404255
Clspn	1.83423e-27	-0.431964	0.08	0.198	3.24989e-23	0.40404
Dpf3	1.02703e-18	-0.383	0.046	0.114	1.81969e-14	0.403508
Lrrc4c	1.81833e-24	-0.847201	0.072	0.179	3.22171e-20	0.402234
Ccdc18	7.16245e-24	-0.398507	0.073	0.182	1.26904e-19	0.401099
Smad3	1.29056e-42	-0.625056	0.104	0.26	2.28662e-38	0.4
Gli3	1.38777e-31	-0.484051	0.074	0.185	2.45886e-27	0.4
Palld	7.66141e-21	-0.426581	0.062	0.156	1.35745e-16	0.397436
Atp10a	2.01718e-18	-0.295972	0.048	0.121	3.57403e-14	0.396694
Wee1	1.49786e-26	-0.315337	0.057	0.144	2.65391e-22	0.395833
Ndst3	2.4811e-38	-0.904589	0.105	0.266	4.39601e-34	0.394737
Cacnb2	6.92323e-26	-0.542883	0.075	0.19	1.22666e-21	0.394737
Slc24a2	1.12559e-14	-0.326361	0.044	0.112	1.99432e-10	0.392857
Iqgap2	3.03914e-24	-0.396577	0.069	0.176	5.38475e-20	0.392045
Kntc1	1.01295e-32	-0.473499	0.085	0.217	1.79474e-28	0.391705
Bcar3	8.05824e-23	-0.474789	0.07	0.18	1.42776e-18	0.388889
Ephb1	6.48282e-38	-1.12002	0.103	0.265	1.14863e-33	0.388679
Mamdc2	1.47129e-29	-0.513091	0.08	0.206	2.60683e-25	0.388349
Unc5c	1.31413e-46	-1.33606	0.104	0.268	2.32838e-42	0.38806
Rgs17	3.00373e-17	-0.32505	0.045	0.117	5.322e-13	0.384615
Tcf7l2	3.80632e-34	-0.48692	0.078	0.204	6.74403e-30	0.382353
Lrp8	1.18233e-26	-0.415733	0.058	0.153	2.09485e-22	0.379085
Polq	4.5442e-34	-0.549377	0.092	0.243	8.05141e-30	0.378601
Prom1	1.9648e-21	-0.291144	0.045	0.119	3.48124e-17	0.378151
Adamtsl3	3.3765e-31	-0.734176	0.077	0.204	5.98248e-27	0.377451
Kirrel3	6.73057e-30	-1.21361	0.053	0.142	1.19252e-25	0.373239
Cenpp	1.20629e-68	-0.988263	0.144	0.386	2.13731e-64	0.373057
Brip1	2.15769e-25	-0.463882	0.069	0.185	3.82299e-21	0.372973
Kcnd3	4.58006e-21	-0.450896	0.05	0.135	8.11495e-17	0.37037
Hcn1	1.27527e-25	-0.579964	0.062	0.168	2.25952e-21	0.369047
Camk4	3.142e-34	-0.630597	0.06	0.164	5.56699e-30	0.365853
Hmgb2	1.12396e-29	-0.376558	0.061	0.167	1.99144e-25	0.365269
Zwilch	2.71467e-21	-0.28948	0.044	0.121	4.80985e-17	0.363636
Rexo5	9.58401e-18	-0.251205	0.042	0.116	1.6981e-13	0.362069
Tbc1d31	8.3543e-28	-0.364017	0.055	0.154	1.48022e-23	0.357143
Ticrr	6.18736e-21	-0.340961	0.053	0.149	1.09628e-16	0.355704
Syt9	4.15119e-24	-0.462934	0.057	0.161	7.35508e-20	0.354037
Tcf7l1	4.71382e-20	-0.333194	0.042	0.119	8.35195e-16	0.352941
Jag1	4.08858e-22	-0.331354	0.043	0.122	7.24415e-18	0.352459
Ryr2	1.61537e-26	-0.868148	0.062	0.177	2.86211e-22	0.350282
Gpc3	9.91055e-22	-0.390015	0.042	0.12	1.75595e-17	0.35
Tanc2	1.36268e-20	-0.381186	0.04	0.115	2.4144e-16	0.347826
Diaph3	1.08536e-105	-1.32178	0.158	0.455	1.92304e-101	0.347253
Mybl1	3.11291e-19	-0.256613	0.035	0.101	5.51545e-15	0.346534
Kank1	1.45837e-26	-0.575812	0.062	0.179	2.58394e-22	0.346369
Csgalnact1	4.05663e-27	-0.434341	0.046	0.133	7.18753e-23	0.345864
Sparcl1	1.71103e-18	-0.328254	0.037	0.107	3.03159e-14	0.345794
E2f7	4.28192e-42	-0.533636	0.072	0.209	7.5867e-38	0.344497
Itga9	8.67303e-23	-0.517893	0.052	0.151	1.53669e-18	0.344371
Add3	5.84069e-24	-0.377441	0.044	0.128	1.03485e-19	0.34375
Etv1	1.28226e-18	-0.363607	0.04	0.117	2.27191e-14	0.34188
Cntn1	2.57222e-25	-0.668725	0.059	0.174	4.55746e-21	0.33908
Bmpr1b	8.4038e-29	-0.465525	0.053	0.157	1.48899e-24	0.337579
Pclaf	1.08054e-24	-0.434466	0.055	0.163	1.9145e-20	0.337423
Plk4	5.55045e-28	-0.373307	0.052	0.155	9.83429e-24	0.335484
Luzp2	5.07476e-37	-0.859911	0.073	0.222	8.99146e-33	0.328829
Lgr5	3.15143e-18	-0.332775	0.039	0.119	5.58371e-14	0.327731
Cenpe	1.3651e-80	-1.11922	0.11	0.336	2.41869e-76	0.327381
Cenpf	1.5137e-72	-1.0809	0.104	0.318	2.68197e-68	0.327044
Ncaph	9.92244e-33	-0.356147	0.047	0.144	1.75806e-28	0.326389
L1cam	2.62536e-21	-0.432534	0.04	0.123	4.65161e-17	0.325203
Pde1a	5.22212e-18	-0.34374	0.035	0.108	9.25255e-14	0.324074
Cntnap4	4.10832e-49	-0.791773	0.071	0.224	7.27913e-45	0.316964
Adamts12	1.26429e-36	-0.542318	0.052	0.166	2.24007e-32	0.313253
Hhip	1.13565e-69	-1.00226	0.096	0.307	2.01214e-65	0.312703
Mns1	2.45837e-22	-0.293892	0.035	0.112	4.35574e-18	0.3125
Dbf4	1.40552e-26	-0.386619	0.046	0.148	2.49031e-22	0.310811
Bora	3.08901e-40	-0.518495	0.054	0.176	5.4731e-36	0.306818
Efcab11	6.68542e-60	-0.782964	0.079	0.258	1.18452e-55	0.306201
Lockd	5.79288e-49	-0.546951	0.06	0.196	1.02638e-44	0.306122
Sorl1	1.21284e-19	-0.356413	0.032	0.105	2.1489e-15	0.304762
Hist1h1e	9.20072e-32	-0.45876	0.048	0.158	1.63018e-27	0.303797
Fancd2	1.42708e-25	-0.348807	0.038	0.126	2.52851e-21	0.301587
Ptchd4	9.1788e-30	-0.458376	0.04	0.133	1.6263e-25	0.300752
Stil	3.34237e-35	-0.435719	0.046	0.154	5.92202e-31	0.298701
Zmat4	6.66053e-33	-0.800725	0.05	0.168	1.18011e-28	0.297619
Cit	1.29993e-64	-0.924692	0.091	0.306	2.30322e-60	0.297386
Kif20b	2.90225e-64	-0.937459	0.086	0.294	5.14221e-60	0.292517
Slc4a4	2.22148e-32	-0.647238	0.044	0.152	3.93601e-28	0.289473
Eps8	1.47543e-29	-0.467139	0.033	0.114	2.61417e-25	0.289473
Sema4d	7.63083e-22	-0.335694	0.032	0.111	1.35203e-17	0.288288
Gm13052	2.15892e-17	-0.4183	0.029	0.101	3.82517e-13	0.287128
Cdh10	1.16025e-27	-0.492706	0.031	0.11	2.05574e-23	0.281818
Acer3	1.32581e-41	-0.582428	0.05	0.18	2.34908e-37	0.277778
Top2a	3.06335e-122	-1.61094	0.121	0.437	5.42764e-118	0.276888
Creb5	6.95956e-36	-0.63007	0.045	0.163	1.23309e-31	0.276073
Mastl	4.91847e-36	-0.4236	0.038	0.14	8.71454e-32	0.271428
Cenpi	4.7295e-30	-0.387907	0.036	0.134	8.37973e-26	0.268657
Lhfp	1.33176e-24	-0.542695	0.029	0.108	2.35961e-20	0.268518
Lrrtm3	2.15853e-40	-0.811765	0.044	0.164	3.82448e-36	0.268293
Pde9a	3.96812e-26	-0.449171	0.036	0.135	7.03072e-22	0.266666
Tacc3	1.0009e-40	-0.554891	0.047	0.178	1.77339e-36	0.264045
Kif15	6.70907e-99	-1.23852	0.09	0.36	1.18871e-94	0.25
Knl1	1.64642e-94	-1.17153	0.085	0.343	2.91713e-90	0.247813
Plxna2	1.66513e-80	-1.20841	0.077	0.312	2.95028e-76	0.246795
Arhgap11a	1.20303e-43	-0.520715	0.041	0.167	2.13153e-39	0.245509
Aspm	5.38051e-78	-1.29935	0.076	0.31	9.53318e-74	0.245161
Rtkn2	2.26818e-33	-0.476321	0.036	0.148	4.01875e-29	0.243243
Foxm1	8.13636e-29	-0.434643	0.033	0.138	1.4416e-24	0.23913
Nuf2	2.65597e-33	-0.448124	0.033	0.14	4.70584e-29	0.235714
Ckap2	5.64131e-44	-0.548678	0.04	0.171	9.99527e-40	0.233918
Incenp	2.9706e-75	-0.811358	0.058	0.249	5.2633e-71	0.232932
Knstrn	1.07654e-33	-0.434479	0.032	0.138	1.90741e-29	0.231884
Kif18a	3.04907e-55	-0.725601	0.05	0.218	5.40234e-51	0.229358
Anln	3.37918e-63	-0.782968	0.052	0.23	5.98723e-59	0.226087
Melk	8.64611e-31	-0.433234	0.03	0.134	1.53192e-26	0.22388
Hist1h1b	2.93446e-42	-0.539022	0.032	0.146	5.19928e-38	0.219178
Kpna2	8.18037e-31	-0.394811	0.026	0.119	1.4494e-26	0.218487
Kif11	7.43446e-103	-1.26049	0.074	0.339	1.31724e-98	0.218289
Ect2	1.26764e-67	-0.850838	0.051	0.237	2.246e-63	0.21519
Nusap1	1.41294e-52	-0.602675	0.037	0.172	2.50345e-48	0.215116
Sgo1	6.57425e-26	-0.384275	0.024	0.113	1.16483e-21	0.212389
Shcbp1	7.60463e-35	-0.386272	0.025	0.118	1.34739e-30	0.211864
Grm1	4.16452e-45	-0.960662	0.033	0.156	7.37869e-41	0.211538
Sgo2a	2.54524e-43	-0.518451	0.031	0.151	4.50966e-39	0.205298
Spag5	2.0993e-49	-0.534045	0.032	0.156	3.71953e-45	0.205128
Mis18bp1	4.78002e-66	-0.811283	0.045	0.22	8.46924e-62	0.204545
Prc1	1.23905e-56	-0.74184	0.041	0.201	2.19535e-52	0.20398
Tpx2	4.5745e-70	-0.956355	0.052	0.255	8.10509e-66	0.203921
Gas2l3	1.49906e-26	-0.395589	0.022	0.108	2.65604e-22	0.203704
Ttk	1.9666e-47	-0.58696	0.035	0.172	3.48441e-43	0.203488
Dlgap5	5.40577e-43	-0.506271	0.028	0.139	9.57794e-39	0.201439
Kif18b	1.18012e-43	-0.521583	0.031	0.154	2.09093e-39	0.201299
Neil3	1.97801e-64	-0.872897	0.048	0.24	3.50464e-60	0.2
Bub1b	4.59781e-43	-0.588082	0.034	0.17	8.14641e-39	0.2
Cdca8	4.28722e-30	-0.335862	0.02	0.101	7.59609e-26	0.19802
Ccna2	3.76086e-35	-0.391283	0.022	0.113	6.6635e-31	0.19469
Kif4	7.25801e-74	-0.940311	0.05	0.258	1.28597e-69	0.193798
Parpbp	3.41342e-35	-0.461214	0.024	0.125	6.0479e-31	0.192
Ncapg	6.99987e-56	-0.697806	0.038	0.199	1.24024e-51	0.190955
Bub1	2.61363e-52	-0.659856	0.035	0.188	4.63084e-48	0.18617
Kif22	6.42345e-43	-0.477479	0.025	0.136	1.13811e-38	0.183823
Kif23	3.4073e-71	-0.82701	0.039	0.215	6.03705e-67	0.181395
Esco2	2.70887e-47	-0.518455	0.025	0.141	4.79957e-43	0.177305
Prr11	6.23051e-33	-0.467544	0.023	0.131	1.10392e-28	0.175572
Ckap2l	1.80809e-53	-0.625149	0.03	0.172	3.20358e-49	0.174419
Espl1	1.02593e-40	-0.464052	0.023	0.132	1.81773e-36	0.174242
Ccnf	1.43421e-42	-0.571714	0.027	0.157	2.54114e-38	0.171974
Iqgap3	1.79305e-41	-0.509722	0.024	0.14	3.17693e-37	0.171428
Cep55	6.87676e-30	-0.383606	0.018	0.105	1.21842e-25	0.171428
Cdca2	9.98835e-79	-0.941804	0.041	0.243	1.76974e-74	0.168724
Cenpa	2.71716e-40	-0.471463	0.02	0.119	4.81426e-36	0.168067
Aurkb	1.67528e-38	-0.387187	0.018	0.108	2.96826e-34	0.166667
Cdk1	4.77367e-44	-0.520093	0.024	0.145	8.45799e-40	0.165517
Ndc80	3.60402e-56	-0.576967	0.025	0.158	6.38561e-52	0.158228
Troap	6.33078e-34	-0.40803	0.017	0.108	1.12169e-29	0.157407
Kif14	9.17906e-65	-0.673227	0.027	0.174	1.62634e-60	0.155172
Kif2c	3.22336e-34	-0.378808	0.015	0.101	5.71114e-30	0.148515
Depdc1b	1.69554e-56	-0.603912	0.023	0.157	3.00416e-52	0.146497
Hmmr	1.6616e-54	-0.629944	0.023	0.158	2.94403e-50	0.14557
Depdc1a	4.41569e-33	-0.434696	0.015	0.109	7.82371e-29	0.137615

## Sheet: cluster 4
gene	p_val	avg_log2FC	fraction + in cluster	fraction + not in cluster	p_val_adj	ratio + in:out of cluster
Gm29521	3.6334e-55	1.16601	0.243	0.063	6.43765e-51	3.85714
Vipr1	3.71824e-17	0.480647	0.101	0.028	6.58797e-13	3.60713
Rasgef1c	4.6886e-26	0.689922	0.14	0.041	8.30726e-22	3.41463
Gprin3	3.19136e-53	1.01855	0.238	0.073	5.65445e-49	3.26027
Adamtsl3	1.59399e-141	1.65799	0.51	0.158	2.82423e-137	3.22785
Kctd16	1.23079e-37	1.17529	0.223	0.07	2.18072e-33	3.18571
Gdpd5	9.23057e-51	1.03281	0.27	0.087	1.63547e-46	3.10344
Ttyh2	9.21092e-37	0.864124	0.22	0.072	1.63199e-32	3.05555
March4	1.36968e-43	0.994838	0.249	0.083	2.4268e-39	3
Galr1	7.54348e-39	0.803088	0.192	0.064	1.33655e-34	3
L1cam	1.13506e-41	0.959489	0.272	0.099	2.0111e-37	2.74747
Pitpnm3	1.46443e-24	0.569987	0.133	0.049	2.59468e-20	2.71428
Sept4	6.84782e-56	0.966809	0.276	0.103	1.2133e-51	2.67961
Plcd1	1.02905e-22	0.634947	0.16	0.062	1.82327e-18	2.58064
Gm26871	2.32939e-45	1.03375	0.279	0.111	4.12721e-41	2.51351
Gm26911	2.67346e-17	0.544301	0.134	0.054	4.73683e-13	2.48148
Ppm1h	4.12099e-223	1.80933	0.723	0.296	7.30157e-219	2.44257
Neurod1	2.5138e-212	1.68582	0.693	0.288	4.45395e-208	2.40625
Dpysl3	1.35925e-71	1.14421	0.401	0.169	2.40831e-67	2.37278
Mmp24	2.04591e-96	1.2593	0.511	0.221	3.62494e-92	2.31222
Prickle2	1.93351e-68	1.17519	0.396	0.175	3.42578e-64	2.26286
Apc2	2.21842e-36	0.943754	0.327	0.145	3.9306e-32	2.25517
Samd12	3.09233e-254	1.8954	0.834	0.375	5.47899e-250	2.224
Sez6l2	8.8954e-18	0.535299	0.151	0.068	1.57609e-13	2.22058
Tex14	4.97054e-11	0.458775	0.119	0.054	8.8068e-07	2.2037
Pdzrn3	1.66795e-54	1.08229	0.403	0.183	2.95528e-50	2.20218
Ppp2r2b	4.29105e-141	1.72146	0.627	0.288	7.60289e-137	2.17708
B3galt2	2.37645e-15	0.495947	0.138	0.064	4.21059e-11	2.15625
Wscd2	8.97151e-37	0.94293	0.333	0.156	1.58957e-32	2.13461
Zbtb46	2.03925e-18	0.536322	0.147	0.069	3.61315e-14	2.13043
Grin2b	2.21762e-239	1.7593	0.832	0.393	3.92918e-235	2.11705
Gabbr2	1.96589e-44	1.05646	0.325	0.154	3.48316e-40	2.11039
Tmem150c	1.60995e-22	0.556195	0.151	0.072	2.85251e-18	2.09722
Cyfip2	3.40351e-39	0.991637	0.33	0.158	6.03034e-35	2.08861
Nyap2	5.06787e-79	1.12595	0.486	0.234	8.97925e-75	2.07692
Cpeb2	2.0329e-19	0.700037	0.211	0.102	3.6019e-15	2.06863
Serpini1	2.49041e-32	0.805936	0.252	0.122	4.41251e-28	2.06557
Sema4f	7.65572e-10	0.417521	0.113	0.055	1.35644e-05	2.05454
Zmat4	1.0387e-30	0.947089	0.292	0.143	1.84036e-26	2.04196
Nfasc	6.60243e-75	1.17063	0.485	0.238	1.16982e-70	2.03781
Epb41l4a	3.7312e-30	0.970481	0.326	0.16	6.61094e-26	2.0375
Grm1	2.00415e-25	0.759876	0.266	0.131	3.55095e-21	2.03053
L3mbtl4	1.92975e-50	1.09324	0.368	0.183	3.41913e-46	2.01093
Ephb1	6.19107e-57	1.13961	0.457	0.228	1.09693e-52	2.00439
St8sia2	4.82506e-24	0.805325	0.256	0.128	8.54904e-20	2
Srgap3	1.8702e-164	1.49099	0.723	0.362	3.31362e-160	1.99724
Prdm8	4.02306e-23	0.816408	0.275	0.138	7.12806e-19	1.99275
Mast1	1.16079e-19	0.630424	0.213	0.107	2.05669e-15	1.99065
Mir124a-1hg	1.30515e-108	1.22336	0.595	0.299	2.31246e-104	1.98997
Rnasel	3.19772e-14	0.483233	0.143	0.072	5.66572e-10	1.98611
Unc5c	2.52137e-56	1.06867	0.455	0.231	4.46737e-52	1.9697
Kif21b	1.36294e-56	1.01822	0.436	0.222	2.41486e-52	1.96396
Gap43	4.43142e-124	1.33485	0.602	0.307	7.85159e-120	1.96091
Scn3a	1.32792e-10	0.403649	0.1	0.051	2.3528e-06	1.96078
Nol4l	6.15981e-39	0.782548	0.278	0.142	1.09139e-34	1.95775
Chrna3	1.48289e-23	0.699851	0.238	0.122	2.62738e-19	1.95082
Cntn2	0	1.77613	0.931	0.479	0	1.94363
Cadm3	4.02788e-110	1.2687	0.617	0.318	7.1366e-106	1.94025
Nhlh1	3.61893e-34	0.814398	0.296	0.153	6.41202e-30	1.93464
Myt1	4.98042e-113	1.23864	0.625	0.325	8.82431e-109	1.92308
Tubb3	4.49883e-22	0.649755	0.226	0.118	7.97103e-18	1.91525
Map3k13	3.33612e-65	1.07648	0.5	0.262	5.91093e-61	1.9084
Celf3	7.27418e-49	0.95505	0.407	0.214	1.28884e-44	1.90187
Ntrk2	7.55992e-47	0.871054	0.356	0.188	1.33947e-42	1.89362
Atcay	2.00861e-14	0.388337	0.116	0.062	3.55885e-10	1.87096
Porcn	2.35362e-13	0.405264	0.123	0.066	4.17015e-09	1.86363
Stmn2	5.66862e-90	1.08398	0.534	0.287	1.00437e-85	1.86063
Timp3	4.77382e-11	0.523784	0.145	0.078	8.45826e-07	1.85897
Ndst3	1.65247e-53	1.02044	0.43	0.232	2.92785e-49	1.85345
Elmo1	1.76318e-127	1.36724	0.679	0.367	3.124e-123	1.85014
Pacsin1	7.29504e-12	0.525487	0.175	0.095	1.29253e-07	1.8421
Epb41l1	4.10733e-57	1.0954	0.447	0.244	7.27737e-53	1.83197
Carmil2	2.43273e-07	0.349093	0.102	0.056	0.00431031	1.82143
Syp	4.85039e-25	0.651848	0.244	0.135	8.59392e-21	1.80741
Gm31409	3.90819e-25	0.75601	0.28	0.155	6.92454e-21	1.80645
Atp8a2	3.17403e-16	0.690016	0.247	0.137	5.62375e-12	1.80292
Jph4	1.19849e-05	0.358618	0.106	0.059	0.212348	1.79661
Nrg1	6.24669e-186	1.75076	0.792	0.442	1.10679e-181	1.79185
Mapk4	4.79366e-28	0.842912	0.31	0.174	8.49341e-24	1.78161
Snap91	3.34546e-39	0.791265	0.341	0.192	5.92748e-35	1.77604
Ppp1r14c	6.54309e-115	1.2691	0.634	0.357	1.15931e-110	1.77591
Syt1	5.24089e-33	0.727406	0.317	0.179	9.28581e-29	1.77095
Glce	4.75864e-123	1.28802	0.662	0.375	8.43137e-119	1.76533
Pax6os1	2.97265e-13	0.465945	0.13	0.074	5.26694e-09	1.75675
Stmn4	2.66936e-16	0.68096	0.258	0.147	4.72957e-12	1.7551
Map6	4.52074e-32	0.781264	0.322	0.184	8.00985e-28	1.75
St18	2.12268e-206	1.45344	0.813	0.465	3.76096e-202	1.74839
Shf	7.57565e-20	0.569428	0.201	0.115	1.34225e-15	1.74782
Srcin1	2.13163e-23	0.649518	0.28	0.161	3.77682e-19	1.73913
Pde9a	1.34221e-16	0.590666	0.203	0.117	2.37813e-12	1.73504
Cerkl	5.90536e-11	0.460253	0.144	0.083	1.04631e-06	1.73494
Nacad	9.98707e-16	0.40847	0.135	0.078	1.76951e-11	1.73077
Myt1l	3.30802e-141	1.42217	0.715	0.414	5.86116e-137	1.72705
Gm49144	9.46809e-08	0.400909	0.113	0.066	0.00167756	1.71212
Akap12	7.19986e-13	0.532287	0.178	0.104	1.27567e-08	1.71154
Syn3	4.20238e-43	0.891303	0.443	0.26	7.44578e-39	1.70385
Kcnj6	3.66748e-173	1.46096	0.798	0.47	6.49805e-169	1.69787
Caskin1	1.98912e-10	0.399391	0.127	0.075	3.52432e-06	1.69333
Stk36	1.48333e-10	0.335472	0.11	0.065	2.62816e-06	1.69231
Chd3	6.00714e-17	0.571629	0.211	0.125	1.06435e-12	1.688
Klc2	1.52626e-05	0.323133	0.101	0.06	0.270423	1.68333
Ina	8.14466e-31	0.666466	0.287	0.171	1.44307e-26	1.67836
Kif5a	1.70798e-31	0.793053	0.36	0.215	3.0262e-27	1.67442
Hmgcll1	5.227e-12	0.519359	0.162	0.097	9.2612e-08	1.6701
Pou2f2	3.17082e-22	0.697933	0.303	0.182	5.61807e-18	1.66483
Apba1	2.01382e-99	1.13307	0.639	0.384	3.56809e-95	1.66406
Cacna1c	3.4139e-108	1.17622	0.71	0.427	6.04874e-104	1.66276
Prkcz	2.82557e-11	0.395556	0.133	0.08	5.00635e-07	1.6625
Sema4g	1.15553e-11	0.394493	0.141	0.085	2.04737e-07	1.65882
Acss2	7.78045e-11	0.493057	0.169	0.102	1.37854e-06	1.65686
Dtna	2.0288e-25	0.750508	0.323	0.195	3.59462e-21	1.65641
Cdk5r1	1.05513e-11	0.571268	0.215	0.13	1.86949e-07	1.65384
Scrt2	8.19742e-19	0.690811	0.29	0.176	1.45242e-14	1.64773
Arpp21	1.4726e-74	0.725425	0.638	0.39	2.60915e-70	1.6359
Cacna1a	2.20896e-38	0.661639	0.454	0.278	3.91384e-34	1.63309
Actl6b	1.4514e-06	0.337169	0.111	0.068	0.0257159	1.63235
Stxbp5l	4.11156e-151	1.29106	0.759	0.465	7.28486e-147	1.63226
Gm3510	5.53249e-06	0.356953	0.106	0.065	0.0980246	1.63077
Kcnk1	3.24867e-20	0.573873	0.224	0.138	5.756e-16	1.62319
Clvs1	1.08784e-143	1.17104	0.764	0.475	1.92744e-139	1.60842
Dner	5.65814e-89	1.12188	0.667	0.416	1.00251e-84	1.60336
Hivep3	6.95078e-79	1.04355	0.597	0.373	1.23154e-74	1.60054
Gm20696	1.48892e-97	1.08814	0.667	0.417	2.63807e-93	1.59952
Pld5	1.90164e-11	0.486126	0.171	0.107	3.36933e-07	1.59813
Celf5	6.86345e-14	0.468349	0.18	0.113	1.21607e-09	1.59292
Disc1	9.82555e-14	0.57158	0.218	0.137	1.74089e-09	1.59124
Plppr3	3.79411e-12	0.602491	0.264	0.166	6.72241e-08	1.59036
Lzts1	1.09229e-27	0.677836	0.342	0.216	1.93532e-23	1.58333
Mturn	8.51723e-08	0.473651	0.182	0.115	0.00150908	1.58261
Gm20125	2.46817e-24	0.714437	0.3	0.19	4.37311e-20	1.57895
Arhgap20	9.52615e-11	0.496482	0.181	0.116	1.68784e-06	1.56034
Atp9a	2.59086e-18	0.577297	0.238	0.153	4.59049e-14	1.55555
Slc24a3	7.13525e-28	0.904486	0.297	0.191	1.26422e-23	1.55497
Ago4	0.000219563	0.369838	0.124	0.08	1	1.55
Plekhg1	1.09483e-10	0.505448	0.141	0.091	1.93981e-06	1.54945
Plppr1	1.21323e-234	1.40151	0.911	0.588	2.14959e-230	1.54932
March3	6.88084e-20	0.685353	0.284	0.184	1.21915e-15	1.54348
Lurap1l	7.80338e-06	0.447364	0.151	0.098	0.13826	1.54081
Vash1	2.8216e-13	0.607882	0.248	0.161	4.9993e-09	1.54037
Dpysl5	1.73873e-36	0.851834	0.459	0.298	3.08069e-32	1.54027
Tmem2	8.00827e-66	1.03922	0.577	0.375	1.4189e-61	1.53867
Gm5087	3.91016e-06	0.447164	0.172	0.112	0.0692802	1.53571
Pcdha11	6.6933e-23	0.69212	0.31	0.202	1.18592e-18	1.53465
Sdc3	3.90675e-09	0.403545	0.141	0.092	6.92199e-05	1.53261
Dopey2	2.67306e-18	0.626105	0.306	0.2	4.73613e-14	1.53
Gpr158	1.08972e-46	0.810864	0.517	0.338	1.93077e-42	1.52959
Igsf21	2.84024e-52	0.947217	0.543	0.355	5.03233e-48	1.52958
Kcnq2	1.69598e-28	0.727606	0.391	0.256	3.00493e-24	1.52734
Tspoap1	2.37701e-29	0.691117	0.36	0.236	4.21158e-25	1.52542
Stxbp1	5.73088e-42	0.85694	0.483	0.318	1.0154e-37	1.51887
Asic1	7.51056e-09	0.379195	0.132	0.087	0.000133072	1.51724
Plcl1	1.4152e-59	1.03156	0.558	0.368	2.50745e-55	1.5163
Sept3	1.61757e-58	0.915645	0.55	0.363	2.86601e-54	1.51515
Tmtc2	2.15957e-162	1.23566	0.826	0.546	3.82632e-158	1.51282
Clmp	2.00957e-103	1.12645	0.694	0.459	3.56056e-99	1.51198
Cadm2	1.34257e-106	0.95957	0.765	0.506	2.37876e-102	1.51186
Synpr	4.67205e-35	0.896894	0.506	0.335	8.27794e-31	1.51045
Snhg14	1.35313e-52	0.736889	0.551	0.365	2.39747e-48	1.50959
Pak1	4.99944e-05	0.369691	0.128	0.085	0.8858	1.50588
Unc5d	7.71607e-23	0.820067	0.316	0.21	1.36713e-18	1.50476
Rgs17	4.11793e-07	0.457252	0.158	0.105	0.00729616	1.50476
Podxl2	1.58293e-30	0.744901	0.382	0.254	2.80464e-26	1.50394
Nhlh2	9.2192e-28	0.712288	0.378	0.252	1.63346e-23	1.5
Cntnap4	8.82125e-18	0.650068	0.3	0.2	1.56295e-13	1.5
Ank1	2.1062e-09	0.447118	0.177	0.118	3.73176e-05	1.5
Gpm6a	1.18332e-173	1.22386	0.856	0.571	2.0966e-169	1.49912
Hcn1	1.31528e-14	0.569274	0.226	0.151	2.33041e-10	1.49669
Mapk8ip1	1.00145e-07	0.45092	0.181	0.121	0.00177437	1.49587
Mex3b	2.80963e-09	0.426743	0.166	0.111	4.97811e-05	1.49549
Slc44a1	3.0019e-38	0.786359	0.423	0.283	5.31876e-34	1.4947
Rasgef1b	3.83786e-191	1.42866	0.867	0.581	6.79991e-187	1.49225
Runx1t1	5.62253e-07	0.412425	0.152	0.102	0.009962	1.49019
Dbn1	2.02295e-19	0.608662	0.295	0.198	3.58427e-15	1.4899
Necab3	7.73551e-07	0.335469	0.113	0.076	0.0137058	1.48684
Map3k12	5.05524e-14	0.482415	0.208	0.14	8.95687e-10	1.48571
Celf4	3.35672e-177	1.22996	0.876	0.591	5.94743e-173	1.48223
Gm37298	1.1731e-10	0.451423	0.176	0.119	2.07849e-06	1.47899
Apbb1	1.75956e-05	0.356809	0.13	0.088	0.31176	1.47727
Ppp1r13b	1.43079e-06	0.341329	0.124	0.084	0.0253507	1.47619
March1	3.00231e-140	1.21663	0.818	0.555	5.31948e-136	1.47387
Klhl29	9.03432e-220	1.50284	0.882	0.599	1.6007e-215	1.47245
Nova2	2.95631e-51	0.833968	0.531	0.362	5.238e-47	1.46685
Sphkap	2.34247e-40	0.837679	0.507	0.346	4.15039e-36	1.46532
Tubb2b	2.86271e-10	0.479079	0.211	0.144	5.07214e-06	1.46528
Kcnj3	2.26059e-118	1.06228	0.766	0.523	4.00531e-114	1.46463
Pik3c2b	1.61397e-08	0.470351	0.191	0.131	0.000285963	1.45801
Dcx	4.84827e-122	1.06186	0.771	0.531	8.59016e-118	1.45198
Phactr3	1.69131e-06	0.439298	0.177	0.122	0.0299667	1.45082
Cplx1	0.00284193	0.304081	0.103	0.071	1	1.4507
Pgm2l1	1.4095e-10	0.536569	0.242	0.167	2.49735e-06	1.4491
Ggt7	3.45243e-09	0.427296	0.18	0.125	6.11701e-05	1.44
Nrxn2	9.07202e-19	0.616121	0.36	0.251	1.60738e-14	1.43426
Abhd16a	6.61671e-06	0.395376	0.169	0.118	0.117235	1.4322
Ano4	5.82569e-19	0.714163	0.305	0.213	1.0322e-14	1.43192
Tub	8.12994e-07	0.318374	0.117	0.082	0.0144046	1.42683
Dusp8	0.000156846	0.382659	0.161	0.113	1	1.42478
Sema6a	4.27878e-241	1.42619	0.91	0.639	7.58114e-237	1.4241
Mtmr4	4.06847e-11	0.479322	0.212	0.149	7.20852e-07	1.42282
Nrcam	4.53324e-125	1.08533	0.795	0.559	8.03199e-121	1.42218
Sorbs1	5.36345e-154	1.10429	0.818	0.576	9.50296e-150	1.42014
Sptbn1	7.73748e-104	1.04734	0.707	0.498	1.37093e-99	1.41968
Tenm2	1.32141e-16	0.641389	0.315	0.222	2.34127e-12	1.41892
Lingo2	0.00165914	0.303233	0.105	0.074	1	1.41892
Mtss1	3.51224e-128	1.17362	0.782	0.552	6.22299e-124	1.41667
Nrep	7.69219e-19	0.620657	0.358	0.253	1.3629e-14	1.41502
Mapre3	0.000522681	0.309958	0.123	0.087	1	1.41379
Efr3b	1.19542e-12	0.598757	0.342	0.242	2.11804e-08	1.41322
Adarb1	3.30329e-10	0.504285	0.245	0.174	5.85277e-06	1.40805
Pik3r2	5.00631e-05	0.310674	0.128	0.091	0.887019	1.40659
Gm37534	5.71655e-05	0.355903	0.146	0.104	1	1.40384
Ankrd13a	5.43236e-15	0.481107	0.231	0.165	9.62505e-11	1.4
Hivep2	7.96618e-66	0.915645	0.678	0.486	1.41145e-61	1.39506
Trpc4ap	7.41391e-12	0.570003	0.305	0.219	1.3136e-07	1.39269
Gm26930	2.28745e-07	0.27986	0.11	0.079	0.00405291	1.3924
Itm2b	9.89803e-14	0.528253	0.242	0.174	1.75373e-09	1.3908
Rab6b	1.66197e-40	0.789198	0.583	0.42	2.94467e-36	1.38809
Bin1	3.64458e-38	0.749414	0.512	0.369	6.45747e-34	1.38753
Uncx	9.71418e-17	0.544414	0.327	0.236	1.72116e-12	1.38559
Rims3	8.91381e-05	0.297926	0.101	0.073	1	1.38356
Nrxn3	4.68046e-10	0.478907	0.35	0.253	8.29283e-06	1.3834
Evi5l	5.64084e-06	0.433376	0.195	0.141	0.0999445	1.38298
Gpc2	0.00038048	0.392272	0.174	0.126	1	1.38095
Dscaml1	2.10173e-86	0.94047	0.749	0.543	3.72385e-82	1.37937
Hip1r	1.45046e-10	0.422817	0.19	0.138	2.56992e-06	1.37681
Egfr	9.32055e-61	0.936139	0.663	0.482	1.65141e-56	1.37552
Rims1	2.0496e-57	0.775348	0.668	0.486	3.63148e-53	1.37449
Cacna1e	7.97048e-14	0.305547	0.378	0.276	1.41221e-09	1.36956
Ckb	1.23784e-08	0.507373	0.253	0.185	0.000219321	1.36757
Sgsm1	6.77351e-09	0.442102	0.205	0.15	0.000120013	1.36667
Zfp423	3.17427e-66	0.983732	0.714	0.525	5.62416e-62	1.36
Aig1	1.19793e-13	0.613173	0.34	0.25	2.12249e-09	1.36
Lingo1	9.80403e-06	0.437138	0.204	0.15	0.173708	1.36
Mapt	2.98659e-12	0.543243	0.303	0.223	5.29165e-08	1.35874
Pard6g	1.13175e-06	0.414566	0.182	0.134	0.0200523	1.35821
Npdc1	1.38286e-06	0.3327	0.137	0.101	0.0245015	1.35643
Herc3	5.76822e-09	0.423253	0.203	0.15	0.000102201	1.35333
Abcc8	0.00781612	0.293496	0.123	0.091	1	1.35165
Crtc3	1.74466e-14	0.548584	0.308	0.228	3.09119e-10	1.35088
Ksr2	0.00433412	0.293007	0.131	0.097	1	1.35051
Kidins220	3.97242e-25	0.686984	0.476	0.354	7.03834e-21	1.34463
Pak7	4.87943e-126	0.948544	0.838	0.625	8.64537e-122	1.3408
Ap3s1	9.29096e-07	0.406787	0.197	0.147	0.0164617	1.34014
Tnik	0	1.41649	0.97	0.725	0	1.33793
Cntn1	4.91707e-08	0.357672	0.211	0.158	0.000871207	1.33544
Ppfia2	8.63827e-144	1.08158	0.845	0.633	1.53053e-139	1.33491
Slc17a6	6.15402e-37	0.62987	0.531	0.398	1.09037e-32	1.33417
Rai2	1.29086e-09	0.542106	0.252	0.189	2.28714e-05	1.33333
Rundc3b	7.04155e-11	0.420386	0.2	0.15	1.24762e-06	1.33333
Onecut2	6.50356e-05	0.319778	0.124	0.093	1	1.33333
Tle2	0.000110574	0.268225	0.116	0.087	1	1.33333
Afap1	3.44375e-52	0.765296	0.569	0.427	6.10164e-48	1.33255
Xkr4	2.26837e-134	1.03349	0.878	0.659	4.0191e-130	1.33232
Gm4258	1.20059e-96	0.95158	0.765	0.576	2.1272e-92	1.32812
Inpp4a	1.88776e-10	0.502798	0.256	0.193	3.34474e-06	1.32642
Wdr47	2.30675e-10	0.450501	0.224	0.169	4.0871e-06	1.32544
Dgki	8.60159e-24	0.614588	0.472	0.357	1.52403e-19	1.32213
Ncan	2.8735e-08	0.435262	0.222	0.168	0.000509127	1.32143
Zfp521	7.26807e-184	1.34204	0.88	0.666	1.28776e-179	1.32132
Kdm5b	1.19992e-12	0.567327	0.42	0.318	2.12602e-08	1.32075
Gm9801	7.84099e-18	0.61718	0.412	0.312	1.38927e-13	1.32051
Zfpm1	1.96087e-05	0.387489	0.165	0.125	0.347427	1.32
Frmpd3	8.38062e-11	0.588165	0.261	0.198	1.48488e-06	1.31818
Map1b	1.13311e-148	1.0167	0.85	0.648	2.00765e-144	1.31173
Unc13a	7.75961e-18	0.587905	0.387	0.296	1.37485e-13	1.30743
Rtn1	9.98945e-51	0.763275	0.672	0.514	1.76993e-46	1.30739
St8sia1	0.00110398	0.338171	0.149	0.114	1	1.30702
Trim67	0.152958	0.277797	0.115	0.088	1	1.30682
Dnajc6	6.91009e-07	0.354952	0.171	0.131	0.0122433	1.30534
Thra	7.20243e-10	0.482586	0.278	0.213	1.27613e-05	1.30516
Sox11	2.92837e-81	0.873725	0.717	0.55	5.18848e-77	1.30364
Atl1	5.4443e-12	0.468213	0.258	0.198	9.64621e-08	1.30303
Fam107b	4.7242e-12	0.514964	0.291	0.225	8.37034e-08	1.29333
Ntn4	1.96773e-32	0.67687	0.495	0.383	3.48642e-28	1.29243
Cpeb3	0.000404741	0.44646	0.244	0.189	1	1.291
Pdgfra	0.00197964	0.368582	0.169	0.131	1	1.29008
Plcb1	1.2259e-169	1.20502	0.911	0.707	2.17205e-165	1.28854
Brsk2	2.89557e-28	0.662079	0.467	0.363	5.13037e-24	1.2865
Triobp	0.00483008	0.33966	0.141	0.11	1	1.28182
Slc22a15	0.00411445	0.273627	0.132	0.103	1	1.28155
Gab1	2.13561e-23	0.701167	0.501	0.391	3.78387e-19	1.28133
Pclo	1.33448e-39	0.666742	0.574	0.448	2.36442e-35	1.28125
Ptpro	4.49311e-08	0.451907	0.242	0.189	0.000796089	1.28042
Sorbs2	7.75055e-06	0.453565	0.203	0.159	0.137324	1.27673
Nmnat2	2.54163e-17	0.559627	0.37	0.29	4.50326e-13	1.27586
Nxpe3	1.48999e-06	0.382455	0.19	0.149	0.0263996	1.27517
Tcte2	8.81343e-07	0.479566	0.275	0.216	0.0156156	1.27315
Sh3kbp1	8.1606e-20	0.649848	0.434	0.342	1.4459e-15	1.26901
Ppfia3	0.0101984	0.312286	0.143	0.113	1	1.26549
Camk2d	4.93274e-21	0.547619	0.476	0.377	8.73982e-17	1.2626
Pax6	6.78377e-33	0.665296	0.582	0.461	1.20195e-28	1.26247
Csrnp3	1.51919e-21	0.633711	0.433	0.343	2.69169e-17	1.26239
Myo10	1.68916e-18	0.630246	0.439	0.348	2.99286e-14	1.26149
Nkain1	1.24117e-11	0.472992	0.33	0.262	2.19911e-07	1.25954
Cers6	4.1342e-09	0.48092	0.301	0.239	7.32497e-05	1.25941
Psd2	0.0529455	0.251839	0.113	0.09	1	1.25555
Kif3c	0.159205	0.385176	0.204	0.163	1	1.25153
Scmh1	3.00549e-69	0.82157	0.719	0.575	5.32513e-65	1.25043
Ephb2	1.49331e-51	0.731275	0.682	0.547	2.64585e-47	1.2468
Psd3	1.05163e-69	0.874996	0.758	0.608	1.86328e-65	1.24671
Ankrd12	3.22894e-14	0.506428	0.37	0.297	5.72104e-10	1.24579
Mfsd6	0.000100362	0.285884	0.132	0.106	1	1.24528
Ttbk1	2.44046e-06	0.414624	0.234	0.188	0.0432401	1.24468
Abca5	0.0175099	0.266507	0.117	0.094	1	1.24468
Add2	3.09007e-21	0.528127	0.418	0.336	5.47498e-17	1.24405
Tmsb4x	3.67452e-09	0.417759	0.233	0.188	6.51051e-05	1.23936
Xkr7	1.45497e-13	0.497684	0.347	0.28	2.57792e-09	1.23929
Cacna1b	2.67826e-23	0.57755	0.538	0.435	4.74534e-19	1.23678
Gm20687	0.000154996	0.455208	0.251	0.203	1	1.23645
Reep3	1.04355e-14	0.531961	0.346	0.28	1.84897e-10	1.23571
Pik3r3	2.91441e-34	0.613737	0.526	0.426	5.16376e-30	1.23474
Kcnk10	0.000210685	0.429827	0.242	0.196	1	1.23469
Ano10	0.00675828	0.291593	0.137	0.111	1	1.23423
Rcor2	4.60133e-08	0.437801	0.286	0.232	0.000815263	1.23276
Tacc2	5.60645e-05	0.431197	0.244	0.198	0.993351	1.23232
Kcnb2	3.91145e-272	1.32027	0.971	0.788	6.93031e-268	1.23223
St6gal1	8.57301e-09	0.550394	0.389	0.316	0.000151897	1.23101
Unc79	4.19627e-24	0.585215	0.541	0.44	7.43496e-20	1.22955
Cpeb4	1.03705e-06	0.401697	0.258	0.21	0.0183744	1.22857
Myo1b	9.87395e-07	0.529301	0.339	0.276	0.0174947	1.22826
Asxl3	1.24358e-25	0.584817	0.533	0.434	2.20337e-21	1.22811
Atp8b2	0.0275342	0.310071	0.151	0.123	1	1.22764
Tuba1a	1.57321e-16	0.616345	0.494	0.403	2.78742e-12	1.22581
Slco5a1	1.98912e-07	0.422423	0.24	0.196	0.00352432	1.22449
Mcf2l	0.000381003	0.405564	0.251	0.205	1	1.22439
Xkr6	2.55613e-24	0.62829	0.524	0.428	4.52895e-20	1.2243
Enox1	1.15619e-163	0.998271	0.907	0.741	2.04853e-159	1.22402
Syt11	3.70059e-13	0.501743	0.391	0.32	6.55671e-09	1.22187
Pag1	1.31863e-11	0.545822	0.376	0.308	2.33634e-07	1.22078
Arhgap44	0.0085374	0.408242	0.26	0.213	1	1.22066
Kdm7a	3.74221e-06	0.429873	0.299	0.245	0.0663045	1.22041
Nav3	4.02753e-116	0.874775	0.915	0.75	7.13598e-112	1.22
Lmtk3	1.01902e-07	0.354116	0.183	0.15	0.0018055	1.22
Osbpl9	7.95807e-15	0.554781	0.411	0.337	1.41001e-10	1.21958
Basp1	2.34414e-63	0.698424	0.703	0.577	4.15334e-59	1.21837
Limk1	0.0245628	0.345972	0.179	0.147	1	1.21769
Lrp1	0.00283218	0.365108	0.214	0.176	1	1.21591
Elavl2	3.74837e-25	0.651199	0.525	0.432	6.64137e-21	1.21528
Mapk10	1.19095e-45	0.658251	0.746	0.614	2.11013e-41	1.21498
Git2	4.5815e-30	0.561405	0.494	0.407	8.11749e-26	1.21376
Rab30	1.34653e-09	0.46836	0.341	0.281	2.38578e-05	1.21352
Atp6v0a1	1.06374e-11	0.498448	0.37	0.305	1.88474e-07	1.21311
Zfpm2	3.49781e-116	1.01834	0.84	0.693	6.19742e-112	1.21212
Tmem63b	0.00025411	0.473786	0.367	0.303	1	1.21122
Fam214a	3.20674e-06	0.357291	0.253	0.209	0.056817	1.21053
Cask	3.46386e-64	0.774921	0.743	0.614	6.13727e-60	1.2101
Ctif	2.27105e-45	0.688887	0.698	0.577	4.02385e-41	1.20971
Prr36	0.00899052	0.311567	0.162	0.134	1	1.20895
Cnpy1	0.0330527	0.256754	0.134	0.111	1	1.20721
Miat	3.72202e-83	0.770186	0.881	0.73	6.59468e-79	1.20685
Klhl32	0.00314631	0.321001	0.152	0.126	1	1.20635
Mindy2	0.000888972	0.299195	0.158	0.131	1	1.20611
Susd6	6.79566e-10	0.429702	0.281	0.233	1.20406e-05	1.20601
Gramd1b	2.61245e-165	0.970006	0.917	0.761	4.62874e-161	1.20499
Smpd3	2.33958e-16	0.568934	0.474	0.395	4.14526e-12	1.2
Ddah2	0.0560749	0.315464	0.162	0.135	1	1.2
Gpr137c	1.14473e-15	0.550908	0.445	0.371	2.02823e-11	1.19946
Sobp	1.16354e-113	0.913153	0.866	0.722	2.06156e-109	1.19945
Syn1	0.00142363	0.291438	0.133	0.111	1	1.1982
Zfp385b	5.82217e-28	0.79018	0.613	0.512	1.03157e-23	1.19727
Rnf150	1.86278e-12	0.481887	0.359	0.3	3.30048e-08	1.19667
Ubl3	1.08003e-09	0.477459	0.305	0.255	1.9136e-05	1.19608
Gm26953	4.99064e-08	0.365122	0.239	0.2	0.000884241	1.195
Mgat5b	2.29407e-11	0.510819	0.457	0.383	4.06463e-07	1.19321
Pkia	6.31806e-10	0.514147	0.428	0.359	1.11943e-05	1.1922
Apc	1.47987e-156	0.935841	0.92	0.772	2.62203e-152	1.19171
Rps6ka2	0.015307	0.379502	0.237	0.199	1	1.19095
Hcfc2	9.64901e-05	0.361837	0.219	0.184	1	1.19022
Ptprs	4.61747e-127	0.936145	0.935	0.787	8.18123e-123	1.18806
Usp29	1.24555e-15	0.579499	0.466	0.393	2.20686e-11	1.18575
Elavl4	0.000167674	0.474005	0.407	0.344	1	1.18314
Nrn1	0.00816108	0.393427	0.278	0.235	1	1.18298
Gria2	1.0689e-73	0.652172	0.875	0.741	1.89388e-69	1.18084
Fam219a	1.8965e-06	0.347847	0.209	0.177	0.0336022	1.18079
Kcnmb4	0.0120796	0.317104	0.154	0.131	1	1.17557
Slc37a3	0.0155503	0.281332	0.161	0.137	1	1.17518
Edil3	2.85914e-44	0.727041	0.765	0.651	5.06583e-40	1.17512
Elavl3	5.90687e-48	0.557964	0.705	0.6	1.04658e-43	1.175
Srrm4	2.79137e-83	0.744908	0.836	0.713	4.94574e-79	1.17251
Sgip1	6.43111e-20	0.453135	0.504	0.43	1.13946e-15	1.17209
Brinp1	0.00734425	0.348244	0.259	0.221	1	1.17195
Mbp	3.39546e-05	0.376919	0.24	0.205	0.601607	1.17073
Avl9	2.49634e-08	0.314074	0.192	0.164	0.000442302	1.17073
Nsg1	0.301582	0.349985	0.206	0.176	1	1.17045
Nova1	4.23777e-28	0.587229	0.599	0.512	7.50847e-24	1.16992
Gtdc1	5.30438e-28	0.542636	0.634	0.542	9.3983e-24	1.16974
Phf20l1	5.15385e-33	0.621474	0.65	0.556	9.1316e-29	1.16906
Rps6ka3	2.82546e-12	0.491976	0.451	0.387	5.00614e-08	1.16537
Hspa4l	0.0254529	0.296887	0.171	0.147	1	1.16326
Atat1	0.00190414	0.311181	0.187	0.161	1	1.16149
Acadsb	0.00746358	0.296153	0.175	0.151	1	1.15894
Scaper	3.15269e-14	0.498712	0.447	0.386	5.58593e-10	1.15803
Sbk1	0.000319211	0.309821	0.193	0.167	1	1.15569
Adcy5	1.13377e-06	0.346152	0.276	0.239	0.0200881	1.15481
Srgap2	1.45876e-69	0.676258	0.785	0.68	2.58462e-65	1.15441
Kcnc3	1.67269e-08	0.418774	0.324	0.281	0.000296367	1.15302
Pcmtd2	0.000192007	0.335625	0.212	0.184	1	1.15217
Cnksr2	2.75481e-32	0.538523	0.666	0.579	4.88096e-28	1.15026
Reep1	0.000900729	0.348702	0.232	0.202	1	1.14851
Clip3	0.00565818	0.362332	0.248	0.216	1	1.14815
Nedd4l	1.0921e-106	0.724453	0.913	0.796	1.93498e-102	1.14698
Fmnl2	7.53095e-73	0.742385	0.832	0.726	1.33433e-68	1.14601
Sema6c	0.0722615	0.250612	0.159	0.139	1	1.14388
Dlgap4	2.08579e-06	0.397403	0.368	0.322	0.036956	1.14286
Sox5	3.01298e-49	0.65114	0.795	0.696	5.33839e-45	1.14224
Gm3764	3.99424e-06	0.405952	0.34	0.298	0.07077	1.14094
Tmeff1	3.45351e-18	0.45678	0.447	0.392	6.11894e-14	1.14031
Prkcb	1.01051e-96	0.667964	0.949	0.833	1.79042e-92	1.13926
Afdn	2.80783e-39	0.578824	0.663	0.582	4.97491e-35	1.13918
Hectd4	8.37091e-22	0.478546	0.57	0.501	1.48316e-17	1.13772
Tsga10	0.00361072	0.334452	0.233	0.205	1	1.13658
Tmem178	1.23815e-06	0.424013	0.333	0.293	0.0219376	1.13652
Gria4	5.33595e-199	1.06603	0.966	0.85	9.45423e-195	1.13647
Sema6d	1.04624e-09	0.509145	0.485	0.427	1.85372e-05	1.13583
Fgf13	1.79786e-25	0.598473	0.666	0.587	3.18546e-21	1.13458
Cadps2	1.51249e-08	0.323759	0.518	0.457	0.000267984	1.13348
Ppp2r3a	3.18561e-05	0.387104	0.309	0.273	0.564426	1.13187
Cep170	4.23145e-37	0.570998	0.713	0.63	7.49727e-33	1.13175
Zfhx2os	0.00577476	0.384938	0.32	0.283	1	1.13074
Dvl3	0.000251851	0.354645	0.245	0.217	1	1.12903
Fnbp1	4.69511e-08	0.324197	0.324	0.287	0.00083188	1.12892
Dctn1	0.0135041	0.32584	0.228	0.202	1	1.12871
Igfbpl1	1.45964e-08	0.366429	0.367	0.326	0.000258619	1.12577
Map2	5.41544e-165	0.842969	0.951	0.845	9.59507e-161	1.12544
Kcnc1	0.000392833	0.304207	0.207	0.184	1	1.125
Sh3gl2	2.90388e-21	0.431918	0.625	0.556	5.14509e-17	1.1241
Mpped2	5.71141e-10	0.458143	0.45	0.401	1.01195e-05	1.12219
Rbfox1	1.08894e-70	0.640153	0.932	0.831	1.92938e-66	1.12154
Mbd6	0.0315064	0.278034	0.177	0.158	1	1.12025
Carmil3	0.00327539	0.352019	0.233	0.208	1	1.12019
Plxna3	0.0232725	0.310913	0.206	0.184	1	1.11956
Sort1	0.000928816	0.330433	0.235	0.21	1	1.11905
Kif5c	1.82745e-37	0.540668	0.749	0.67	3.23788e-33	1.11791
Dpf2	0.0241144	0.276913	0.171	0.153	1	1.11765
Frmd5	4.09382e-20	0.49654	0.566	0.507	7.25344e-16	1.11637
Hivep1	7.66496e-05	0.368318	0.347	0.311	1	1.11576
Cacnb4	0.000279244	0.296477	0.262	0.235	1	1.11489
Frmd4a	4.68794e-103	0.71146	0.931	0.836	8.3061e-99	1.11364
Ror1	5.79204e-09	0.534018	0.422	0.379	0.000102623	1.11346
Kif1b	6.25205e-60	0.546926	0.852	0.766	1.10774e-55	1.11227
Arhgef7	3.19105e-11	0.454711	0.468	0.421	5.65391e-07	1.11164
St7	5.40081e-15	0.43684	0.608	0.548	9.56916e-11	1.10949
Klf12	2.98199e-68	0.664066	0.917	0.827	5.28349e-64	1.10883
Park2	3.05413e-09	0.457302	0.388	0.35	5.41131e-05	1.10857
Zswim5	0.0566003	0.310388	0.195	0.176	1	1.10795
Jmjd1c	1.7212e-54	0.619247	0.811	0.734	3.04962e-50	1.1049
Ctnna2	4.49066e-191	0.907169	0.984	0.891	7.95656e-187	1.10438
Dmxl2	8.99624e-07	0.401525	0.434	0.393	0.0159395	1.10433
Gdi1	0.0489999	0.310552	0.236	0.214	1	1.1028
Anks1b	4.13421e-24	0.3361	0.806	0.731	7.325e-20	1.1026
Rab3c	2.00297e-12	0.429985	0.559	0.507	3.54887e-08	1.10256
Opcml	1.92173e-12	0.56313	0.484	0.439	3.40492e-08	1.10251
Astn2	2.18971e-174	0.942575	0.979	0.888	3.87973e-170	1.10248
Parp8	0.0809532	0.34355	0.248	0.225	1	1.10222
Soga1	1.38084e-14	0.47423	0.583	0.529	2.44657e-10	1.10208
Pde4d	6.17471e-180	1.01272	0.975	0.885	1.09404e-175	1.10169
Cadps	2.33454e-72	0.581145	0.903	0.82	4.13633e-68	1.10122
Vezt	9.34509e-05	0.385804	0.414	0.376	1	1.10106
Cpe	8.78371e-17	0.430274	0.503	0.457	1.5563e-12	1.10066
Fbxl20	4.72647e-05	0.31742	0.342	0.311	0.837436	1.09968
Acyp2	0.00991246	0.414209	0.312	0.284	1	1.09859
Ubash3b	0.000533951	0.433257	0.348	0.317	1	1.09779
Tnfrsf21	0.00029532	0.28132	0.226	0.206	1	1.09709
Scamp1	0.187503	0.257181	0.161	0.147	1	1.09524
Col11a1	1.17633e-12	0.414701	0.545	0.498	2.08423e-08	1.09438
Itsn1	3.86348e-18	0.425021	0.584	0.534	6.84531e-14	1.09363
Bicd1	1.19561e-23	0.460274	0.609	0.557	2.11839e-19	1.09336
Ssbp3	1.65373e-21	0.458667	0.613	0.561	2.93008e-17	1.09269
Nlgn2	0.278446	0.272286	0.19	0.174	1	1.09195
Fnbp1l	2.27036e-12	0.415933	0.551	0.505	4.02263e-08	1.09109
Ptprn2	8.7141e-12	0.350253	0.583	0.535	1.54396e-07	1.08972
Ccser1	4.19078e-127	0.756483	0.961	0.882	7.42522e-123	1.08957
Polb	0.00108318	0.313768	0.234	0.215	1	1.08837
Ank2	2.21772e-163	0.812812	0.978	0.899	3.92935e-159	1.08788
Rbfox3	5.41865e-96	0.645228	0.978	0.899	9.60076e-92	1.08788
Fyn	1.21687e-18	0.434228	0.601	0.553	2.15606e-14	1.0868
Ptn	5.66348e-06	0.443859	0.326	0.3	0.100346	1.08667
Hmgcs1	0.00738075	0.276344	0.139	0.128	1	1.08594
Peli2	1.42533e-29	0.539087	0.727	0.67	2.5254e-25	1.08507
Scg5	9.55059e-10	0.358281	0.397	0.366	1.69217e-05	1.0847
Klf7	1.04603e-15	0.418197	0.592	0.546	1.85335e-11	1.08425
Ppp2r2c	8.25182e-18	0.390344	0.71	0.655	1.46206e-13	1.08397
Parp6	0.0180683	0.321408	0.26	0.24	1	1.08333
Trio	7.70003e-42	0.493713	0.782	0.722	1.36429e-37	1.0831
Erbb4	3.83371e-296	1.22707	0.993	0.917	6.79258e-292	1.08288
Grk3	0.00846066	0.340171	0.279	0.258	1	1.08139
Foxp1	1.26415e-32	0.503944	0.814	0.753	2.23982e-28	1.08101
Senp7	1.87177e-07	0.363129	0.443	0.41	0.00331641	1.08049
Aff3	1.29263e-29	0.484483	0.82	0.759	2.29028e-25	1.08037
Tll1	0.000613031	0.367181	0.344	0.319	1	1.07837
Ulk2	1.7189e-05	0.348943	0.303	0.281	0.304555	1.07829
Zic1	1.72959e-17	0.420996	0.647	0.601	3.06449e-13	1.07654
Astn1	1.42888e-09	0.348913	0.548	0.51	2.53169e-05	1.07451
Clasp2	5.32062e-24	0.434358	0.67	0.624	9.42707e-20	1.07372
Arhgef2	1.69616e-05	0.347596	0.394	0.367	0.300526	1.07357
Atp1b3	0.00851211	0.322507	0.253	0.236	1	1.07203
Nrxn1	9.77051e-135	0.678321	0.989	0.923	1.73114e-130	1.07151
Add1	0.0306263	0.314002	0.257	0.24	1	1.07083
Pid1	5.17467e-07	0.288244	0.318	0.297	0.00916847	1.07071
Jakmip2	5.48563e-05	0.363358	0.471	0.44	0.971943	1.07045
Rorb	0.00638773	0.317191	0.174	0.163	1	1.06748
Lhx1os	0.00589822	0.325328	0.317	0.297	1	1.06734
Snap25	5.06208e-09	0.359825	0.623	0.584	8.96899e-05	1.06678
B3galt1	3.05676e-37	0.474357	0.87	0.817	5.41597e-33	1.06487
Dixdc1	8.94525e-06	0.319122	0.345	0.324	0.158492	1.06481
Exoc6b	3.23964e-15	0.36972	0.611	0.574	5.73999e-11	1.06446
Gng2	2.02155e-07	0.35819	0.487	0.458	0.00358179	1.06332
Reln	4.27871e-100	0.727382	0.96	0.903	7.58102e-96	1.06312
Ppm1l	7.48483e-08	0.371487	0.489	0.46	0.00132616	1.06304
Kif1a	1.30873e-07	0.349836	0.389	0.366	0.00231881	1.06284
Enox2	0.000161819	0.38455	0.409	0.385	1	1.06234
Zswim6	1.18035e-14	0.377031	0.482	0.454	2.09134e-10	1.06167
Rufy3	7.22097e-09	0.380155	0.504	0.475	0.000127941	1.06105
Ebf3	3.3904e-33	0.401913	0.877	0.827	6.00712e-29	1.06046
Gnaq	3.65245e-23	0.399243	0.714	0.674	6.47141e-19	1.05935
Ebf1	3.56444e-70	0.48574	0.969	0.915	6.31548e-66	1.05902
Nlgn1	3.97927e-17	0.278847	0.9	0.85	7.05048e-13	1.05882
Tcaf1	0.00420944	0.337798	0.36	0.34	1	1.05882
Ube2h	0.00216628	0.305486	0.363	0.343	1	1.05831
Ttc3	9.87013e-42	0.411737	0.854	0.808	1.74879e-37	1.05693
Msra	8.34926e-08	0.580523	0.505	0.478	0.00147932	1.05649
Zbtb18	5.55878e-05	0.327047	0.329	0.312	0.984904	1.05449
Nbea	2.20516e-39	0.400972	0.892	0.846	3.90711e-35	1.05437
Galnt17	0.000389402	0.357296	0.447	0.424	1	1.05425
App	1.02231e-24	0.416099	0.793	0.753	1.81134e-20	1.05312
Scn8a	2.28545e-11	0.362023	0.694	0.659	4.04936e-07	1.05311
St6galnac3	0.0945715	0.352272	0.298	0.283	1	1.053
Stard9	0.0715384	0.315097	0.299	0.284	1	1.05282
Otud7a	0.00326238	0.321738	0.422	0.401	1	1.05237
Ppp3ca	8.17592e-29	0.428475	0.832	0.791	1.44861e-24	1.05183
Ank3	8.16458e-199	0.899647	0.991	0.943	1.4466e-194	1.0509
Maml3	4.20261e-56	0.494839	0.939	0.894	7.44618e-52	1.05034
Tmod2	0.000666691	0.310579	0.298	0.284	1	1.0493
Eml5	8.1061e-06	0.369775	0.454	0.433	0.143624	1.0485
Tmem178b	1.09554e-17	0.322626	0.856	0.817	1.94107e-13	1.04774
Snx29	1.90961e-05	0.348311	0.461	0.44	0.338346	1.04773
Bcl2l1	0.00250044	0.27416	0.223	0.213	1	1.04695
Lsamp	4.45872e-79	0.657241	0.975	0.932	7.89997e-75	1.04614
Gramd1a	0.00361002	0.285263	0.253	0.242	1	1.04545
Baz2a	0.0185219	0.284759	0.304	0.291	1	1.04467
Foxn2	0.0513207	0.279958	0.259	0.248	1	1.04435
Nol4	3.825e-27	0.396929	0.851	0.815	6.77714e-23	1.04417
Kdm6b	0.0349141	0.275703	0.333	0.319	1	1.04389
Dpysl2	1.24083e-07	0.332179	0.502	0.481	0.0021985	1.04366
Synj1	0.056284	0.281399	0.244	0.234	1	1.04273
Adgrl3	1.20439e-07	0.378637	0.684	0.656	0.00213393	1.04268
Mfhas1	0.0416782	0.314884	0.246	0.236	1	1.04237
Nav2	3.80478e-263	0.968888	0.999	0.959	6.74131e-259	1.04171
Spag9	3.92574e-13	0.378219	0.683	0.656	6.95562e-09	1.04116
Grik2	8.10713e-179	0.782943	0.997	0.958	1.43642e-174	1.04071
Kcnh8	0.144578	0.270545	0.258	0.248	1	1.04032
Rnf165	2.27204e-06	0.345492	0.518	0.498	0.0402559	1.04016
Dip2a	0.673501	0.25823	0.213	0.205	1	1.03902
Bach2	8.81871e-13	0.329747	0.693	0.667	1.5625e-08	1.03898
Lhx1	0.0135088	0.294339	0.32	0.308	1	1.03896
Enah	8.32719e-10	0.380373	0.567	0.546	1.47541e-05	1.03846
Dync1i2	1.25187e-05	0.320557	0.434	0.418	0.221806	1.03828
Anks1	0.0206206	0.313773	0.329	0.317	1	1.03785
Rsrp1	0.00734027	0.285013	0.278	0.268	1	1.03731
Sptan1	7.40799e-05	0.325101	0.454	0.438	1	1.03653
Trak1	3.57956e-08	0.326895	0.546	0.53	0.000634226	1.03019
Arhgef10l	0.181604	0.274014	0.345	0.335	1	1.02985
Snapc3	0.0199644	0.270568	0.312	0.303	1	1.0297
Myo18a	0.265427	0.273212	0.245	0.238	1	1.02941
Ankrd44	0.0111644	0.304271	0.431	0.419	1	1.02864
Arhgap21	5.81399e-11	0.311287	0.673	0.655	1.03012e-06	1.02748
Tmcc1	2.71094e-09	0.334984	0.582	0.567	4.80324e-05	1.02645
Rb1cc1	0.00354678	0.292953	0.393	0.383	1	1.02611
Csnk1g1	6.22015e-05	0.315748	0.436	0.425	1	1.02588
Celf2	1.84966e-292	0.958787	0.999	0.974	3.27722e-288	1.02567
Cog7	0.00767893	0.306441	0.5	0.488	1	1.02459
Kat2b	0.171521	0.302113	0.3	0.293	1	1.02389
Stau2	0.000433431	0.309754	0.449	0.439	1	1.02278
Tsc1	0.0116896	0.25063	0.225	0.22	1	1.02273
Tnrc6c	1.40091e-06	0.318006	0.503	0.492	0.0248214	1.02236
Rere	5.06126e-20	0.311802	0.888	0.869	8.96755e-16	1.02186
Mycbp2	2.84877e-10	0.292375	0.715	0.7	5.04746e-06	1.02143
Chd7	9.40661e-72	0.42848	0.983	0.963	1.66666e-67	1.02077
Rtn4	1.20541e-08	0.317228	0.503	0.493	0.000213574	1.02028
Dopey1	0.00689573	0.281252	0.302	0.296	1	1.02027
Phf14	3.56238e-09	0.288771	0.637	0.625	6.31182e-05	1.0192
Zmiz2	0.000712271	0.282067	0.27	0.265	1	1.01887
Gm49353	0.0748832	0.255224	0.28	0.275	1	1.01818
Setbp1	2.97732e-21	0.257506	0.975	0.959	5.27521e-17	1.01668
Auts2	3.13372e-100	0.481933	0.992	0.976	5.55233e-96	1.01639
Fbxo11	5.33165e-07	0.296494	0.545	0.537	0.00944662	1.0149
Smarcc2	8.44761e-06	0.30991	0.504	0.497	0.149675	1.01408
Plekha5	2.85323e-07	0.324406	0.581	0.573	0.00505535	1.01396
Rbfox2	3.93651e-13	0.296235	0.738	0.729	6.97471e-09	1.01235
Gsk3b	8.16152e-11	0.287114	0.691	0.683	1.44606e-06	1.01171
Clip2	0.1927	0.261687	0.262	0.259	1	1.01158
Fgd4	6.81024e-06	0.290292	0.547	0.541	0.120664	1.01109
Erc2	0.00135335	0.281667	0.422	0.418	1	1.00957
Evl	0.0010533	0.289561	0.544	0.539	1	1.00928
Usp32	0.00583767	0.25929	0.332	0.329	1	1.00912
Cacna2d1	1.87059e-218	0.737183	0.999	0.99	3.31431e-214	1.00909
Kdm1a	0.000160213	0.272758	0.447	0.443	1	1.00903
Klhl24	0.00374318	0.254507	0.278	0.276	1	1.00725
Sufu	0.00802145	0.292719	0.441	0.438	1	1.00685
Ddr1	0.0127933	0.260342	0.315	0.313	1	1.00639
Kifap3	0.28992	0.257234	0.322	0.32	1	1.00625
Fstl5	0.369283	0.263403	0.178	0.177	1	1.00565
Tcf4	5.29485e-50	0.306017	0.996	0.991	9.38141e-46	1.00505
Dcc	1.11214e-31	-0.33096	0.992	0.99	1.97049e-27	1.00202
Tulp4	0.0049768	0.283255	0.534	0.533	1	1.00188
Kmt2e	5.95893e-09	0.265055	0.702	0.701	0.00010558	1.00143
Nfib	1.27758e-89	0.33698	1	0.999	2.26361e-85	1.001
Zfp608	4.95652e-05	0.25674	0.616	0.616	0.878197	1
Riok3	0.127576	0.256002	0.275	0.275	1	1
Ppm1e	1.55519e-05	0.310796	0.513	0.514	0.275549	0.998054
Ttc28	1.33562e-05	0.270427	0.644	0.646	0.236645	0.996904
Grid1	0.0316204	0.333706	0.447	0.449	1	0.995545
Ldlrad4	0.0151095	0.276687	0.432	0.434	1	0.995391
Celsr3	0.270665	0.252033	0.432	0.434	1	0.995391
Fzd3	0.0794733	0.253265	0.368	0.37	1	0.994594
Pcsk2	0.810137	0.330217	0.377	0.38	1	0.992105
Ppip5k2	0.0608442	0.25319	0.248	0.25	1	0.992
Nsg2	0.00834234	0.263236	0.346	0.349	1	0.991404
Tmem57	0.0506045	0.250199	0.401	0.407	1	0.985258
Atxn10	0.074647	0.251315	0.37	0.376	1	0.984042
Ophn1	0.252623	0.251486	0.353	0.359	1	0.983287
mt-Rnr2	6.24749e-106	-0.632437	0.975	0.995	1.10693e-101	0.979899
Nhsl1	0.387811	0.260917	0.341	0.349	1	0.977077
mt-Rnr1	5.03713e-98	-0.639202	0.971	0.994	8.92479e-94	0.976861
Ptprd	2.92359e-48	-0.347563	0.942	0.975	5.18002e-44	0.966154
Fam155a	1.50491e-14	-0.35253	0.872	0.911	2.66641e-10	0.95719
Map3k1	2.07228e-47	-0.349358	0.918	0.962	3.67167e-43	0.954262
Cmss1	1.69483e-29	-0.532884	0.91	0.956	3.00289e-25	0.951883
Gm42418	8.72896e-20	-0.393487	0.855	0.914	1.5466e-15	0.935448
Pbx3	3.44923e-11	-0.284689	0.802	0.865	6.11135e-07	0.927168
Mir99ahg	4.31213e-19	-0.305933	0.827	0.897	7.64023e-15	0.921962
Zeb1	2.8111e-124	-0.790658	0.876	0.957	4.98071e-120	0.91536
Rora	9.56839e-42	-0.395294	0.838	0.932	1.69533e-37	0.899142
Zmiz1	1.18963e-36	-0.529473	0.75	0.863	2.10778e-32	0.869061
Map4k4	1.58263e-53	-0.501497	0.763	0.879	2.80411e-49	0.868032
Stag1	2.30059e-14	-0.280855	0.672	0.782	4.07618e-10	0.859335
Exoc4	1.8116e-11	-0.253289	0.658	0.777	3.20978e-07	0.846847
Magi2	7.41246e-45	-0.433124	0.727	0.874	1.31334e-40	0.831808
Kcnh7	1.1374e-45	-0.763351	0.687	0.826	2.01524e-41	0.831719
Kcnq1ot1	4.14583e-15	-0.305858	0.631	0.769	7.34559e-11	0.820546
Pde4dip	6.13681e-12	-0.278241	0.533	0.65	1.08732e-07	0.82
Cntnap2	1.1016e-13	-0.449071	0.51	0.622	1.95182e-09	0.819936
Syne2	2.94127e-15	-0.268086	0.578	0.71	5.21135e-11	0.814084
Rbm25	4.78153e-24	-0.342164	0.633	0.783	8.47191e-20	0.808429
Tead1	1.80559e-14	-0.288973	0.579	0.717	3.19914e-10	0.807531
Lrrc7	3.18851e-93	-0.785248	0.722	0.898	5.64941e-89	0.804009
Gse1	6.18217e-81	-0.790972	0.696	0.869	1.09536e-76	0.800921
Prrc2c	1.25512e-20	-0.33243	0.586	0.736	2.22382e-16	0.796196
Nsd2	5.35892e-12	-0.305048	0.525	0.661	9.49494e-08	0.794251
Ncoa1	3.33587e-15	-0.303232	0.528	0.666	5.91049e-11	0.792793
Tox3	2.82424e-12	-0.288956	0.554	0.699	5.00399e-08	0.792561
Huwe1	2.49613e-40	-0.431163	0.622	0.786	4.42265e-36	0.791348
Cux1	4.89207e-27	-0.345844	0.556	0.704	8.66777e-23	0.789773
Ankrd11	8.61474e-20	-0.34459	0.57	0.723	1.52636e-15	0.788382
Lrp1b	0.00748809	-0.300084	0.145	0.184	1	0.788043
Nedd4	6.63921e-54	-0.53328	0.645	0.821	1.17634e-49	0.785627
Prrc2b	1.52782e-12	-0.263512	0.506	0.65	2.707e-08	0.778461
Mllt10	1.08662e-15	-0.323543	0.554	0.712	1.92528e-11	0.77809
Mbnl2	4.48696e-11	-0.255938	0.436	0.568	7.95e-07	0.767605
Gm26917	1.01016e-26	-0.59762	0.509	0.665	1.7898e-22	0.765413
Pak3	9.4963e-24	-0.374424	0.486	0.635	1.68255e-19	0.765354
Hnrnpa2b1	5.45726e-31	-0.467006	0.571	0.748	9.66917e-27	0.763369
Fut8	1.74377e-24	-0.414363	0.528	0.692	3.08961e-20	0.763006
Zeb2	4.40554e-31	-0.421037	0.548	0.724	7.80573e-27	0.756906
Ralgps2	1.58322e-10	-0.271876	0.394	0.522	2.80515e-06	0.754789
Eif4g3	3.71853e-24	-0.397912	0.534	0.708	6.58849e-20	0.754237
Fubp1	1.70359e-13	-0.316936	0.49	0.65	3.01843e-09	0.753846
Cnot1	3.60927e-08	-0.254565	0.433	0.575	0.00063949	0.753043
Cacng2	5.93427e-22	-0.480012	0.512	0.681	1.05143e-17	0.751835
Grip1	6.37828e-63	-0.701974	0.647	0.864	1.1301e-58	0.748843
Hnrnpu	2.90995e-36	-0.524463	0.573	0.766	5.15584e-32	0.748042
Tbl1x	2.71158e-15	-0.25431	0.447	0.599	4.80438e-11	0.746244
Hs3st5	4.437e-79	-0.832338	0.62	0.831	7.86148e-75	0.746089
Hdac9	1.75617e-29	-0.434462	0.537	0.723	3.11159e-25	0.742738
Neo1	3.40627e-17	-0.342086	0.491	0.665	6.03522e-13	0.738346
Frmd4b	4.68377e-74	-0.945191	0.56	0.759	8.2987e-70	0.737813
Egfem1	2.66047e-14	-0.267753	0.364	0.495	4.71382e-10	0.735353
Kcnq5	1.67514e-11	-0.311287	0.393	0.535	2.96802e-07	0.734579
Kcnd2	9.8572e-06	-0.728007	0.18	0.246	0.17465	0.731707
Matr3	1.27745e-10	-0.258346	0.405	0.556	2.26339e-06	0.728417
Atp2b1	6.39296e-17	-0.260843	0.386	0.531	1.13271e-12	0.72693
Prrc2a	1.68506e-19	-0.272711	0.366	0.504	2.9856e-15	0.72619
Fus	1.59064e-22	-0.338412	0.447	0.617	2.8183e-18	0.724473
Tpr	4.53626e-20	-0.267896	0.372	0.514	8.03735e-16	0.723735
Atrnl1	1.15199e-13	-0.295384	0.403	0.558	2.0411e-09	0.722222
Cecr2	9.85849e-44	-0.539907	0.521	0.722	1.74673e-39	0.721607
Large1	1.01653e-17	-0.281625	0.399	0.554	1.80109e-13	0.720216
Qk	3.42581e-18	-0.378422	0.434	0.606	6.06985e-14	0.716171
Rsrc1	1.88119e-22	-0.351316	0.43	0.601	3.33308e-18	0.715474
Ywhae	1.5887e-12	-0.293514	0.374	0.523	2.81485e-08	0.715105
Nsmce2	3.8268e-15	-0.258554	0.368	0.516	6.78032e-11	0.713178
Ptprg	1.77523e-122	-1.13796	0.609	0.856	3.14536e-118	0.711449
Ankhd1	5.53237e-15	-0.253112	0.359	0.505	9.80225e-11	0.710891
Dyrk1a	3.31161e-17	-0.369204	0.412	0.58	5.86752e-13	0.710345
Zfp704	1.05585e-41	-0.677892	0.511	0.721	1.87076e-37	0.708738
Mtcl1	3.1803e-10	-0.262487	0.338	0.477	5.63486e-06	0.708595
Rptor	1.38446e-12	-0.254615	0.364	0.514	2.45299e-08	0.708171
Tmeff2	2.46235e-24	-0.565495	0.492	0.696	4.36279e-20	0.706896
Foxp2	1.04556e-109	-0.947808	0.609	0.862	1.85253e-105	0.706496
Tmem131	8.22579e-24	-0.416732	0.428	0.606	1.45745e-19	0.706271
Ewsr1	2.41193e-18	-0.332849	0.397	0.564	4.27345e-14	0.703901
Zfr	3.44002e-08	-0.259254	0.328	0.467	0.000609504	0.702355
Ube2k	1.35578e-18	-0.257193	0.312	0.448	2.40217e-14	0.696428
Srek1	1.1952e-23	-0.39687	0.415	0.599	2.11766e-19	0.692821
Ezh2	1.25313e-20	-0.389769	0.39	0.563	2.2203e-16	0.692717
Npas3	4.88798e-13	-0.308076	0.324	0.468	8.66052e-09	0.692308
Dpp6	1.70185e-15	-0.421274	0.27	0.39	3.01533e-11	0.692308
Dhx9	5.29369e-26	-0.356417	0.386	0.559	9.37937e-22	0.690519
Mphosph9	3.86201e-12	-0.272141	0.325	0.471	6.84272e-08	0.690021
Taf15	2.16043e-13	-0.268664	0.325	0.474	3.82785e-09	0.685654
Ccnd2	9.1458e-17	-0.403043	0.346	0.507	1.62045e-12	0.682446
Rngtt	6.49603e-12	-0.269997	0.305	0.447	1.15097e-07	0.682326
Smarcc1	1.29408e-27	-0.39892	0.403	0.591	2.29286e-23	0.681895
Lpp	2.333e-19	-0.274147	0.319	0.468	4.13361e-15	0.681624
Lims1	2.05178e-15	-0.258902	0.312	0.458	3.63535e-11	0.681223
Mdga1	2.49102e-54	-0.618815	0.48	0.705	4.4136e-50	0.680851
Sncaip	7.78606e-15	-0.286462	0.323	0.475	1.37953e-10	0.68
Sipa1l3	5.22816e-58	-0.726256	0.486	0.715	9.26326e-54	0.67972
Tle4	7.54228e-11	-0.258346	0.291	0.429	1.33634e-06	0.678322
Rapgef6	2.44953e-10	-0.253779	0.294	0.434	4.34007e-06	0.677419
Tenm1	1.3228e-08	-0.377349	0.153	0.226	0.000234374	0.676991
Exoc2	3.02444e-17	-0.424906	0.339	0.501	5.35871e-13	0.676647
Robo1	9.42141e-25	-0.482089	0.394	0.583	1.66928e-20	0.675815
Pds5b	7.89687e-34	-0.477784	0.425	0.629	1.39917e-29	0.675676
Prpf4b	2.55763e-11	-0.260588	0.293	0.434	4.53161e-07	0.675115
Cblb	8.89078e-27	-0.409999	0.371	0.55	1.57527e-22	0.674545
Cdh20	0	-1.90017	0.627	0.93	0	0.674193
Lcorl	4.8886e-16	-0.337908	0.329	0.488	8.66163e-12	0.67418
Dync2h1	8.08491e-14	-0.331068	0.335	0.497	1.43248e-09	0.674044
Slc1a2	3.33375e-31	-0.572629	0.44	0.653	5.90673e-27	0.673813
Syncrip	1.48541e-24	-0.394974	0.373	0.557	2.63184e-20	0.669659
Map2k5	2.14174e-17	-0.29313	0.315	0.471	3.79474e-13	0.66879
Rock2	1.43327e-13	-0.287293	0.293	0.439	2.53947e-09	0.667426
Wwox	1.59199e-41	-0.527866	0.438	0.657	2.82069e-37	0.666667
Stag2	4.14222e-20	-0.353016	0.342	0.513	7.33918e-16	0.666667
Hnrnpc	8.4784e-12	-0.282515	0.292	0.438	1.5022e-07	0.666667
Hnrnpk	3.11216e-12	-0.252434	0.268	0.403	5.51412e-08	0.665012
Eif4g1	9.95769e-22	-0.3791	0.355	0.534	1.7643e-17	0.664794
Reps1	1.55671e-12	-0.258443	0.272	0.411	2.75819e-08	0.6618
Filip1l	1.15679e-17	-0.394966	0.29	0.439	2.04961e-13	0.660592
Gm20388	7.15812e-37	-0.533608	0.395	0.599	1.26828e-32	0.659432
Xrn2	8.11201e-17	-0.284428	0.295	0.448	1.43729e-12	0.658482
Trim24	1.85914e-19	-0.290842	0.281	0.427	3.29402e-15	0.658079
Pds5a	7.95569e-30	-0.448615	0.372	0.567	1.40959e-25	0.656085
Rbbp6	1.82507e-27	-0.34757	0.308	0.47	3.23366e-23	0.655319
Wasf3	1.9425e-16	-0.264791	0.247	0.377	3.44171e-12	0.655172
Tshz2	6.73761e-104	-1.05532	0.522	0.798	1.19377e-99	0.654135
Smyd3	1.67868e-24	-0.47931	0.356	0.545	2.97428e-20	0.653211
Slc10a7	6.40058e-17	-0.308009	0.271	0.415	1.13406e-12	0.653012
Purb	1.18843e-10	-0.304884	0.25	0.384	2.10566e-06	0.651041
Map2k6	2.3561e-13	-0.269097	0.221	0.34	4.17454e-09	0.65
Uhrf2	2.61618e-22	-0.412496	0.334	0.514	4.63535e-18	0.649805
Pcbp2	6.46672e-15	-0.266977	0.255	0.393	1.14577e-10	0.648855
Tcerg1	7.73278e-22	-0.377059	0.337	0.52	1.37009e-17	0.648077
Asap2	5.57349e-16	-0.272357	0.248	0.383	9.87512e-12	0.647519
Pspc1	3.03022e-17	-0.251033	0.249	0.385	5.36895e-13	0.646753
Hcfc1	2.04143e-13	-0.260747	0.245	0.379	3.61701e-09	0.646438
Cdc42se2	3.85563e-17	-0.262579	0.243	0.376	6.83141e-13	0.646276
Dlg1	5.32358e-17	-0.295559	0.274	0.424	9.43232e-13	0.646226
Snd1	8.54875e-30	-0.427609	0.341	0.528	1.51467e-25	0.645833
Gpbp1	8.3371e-15	-0.305358	0.297	0.46	1.47717e-10	0.645652
Srrm1	1.26529e-28	-0.361113	0.3	0.465	2.24184e-24	0.645161
Robo2	1.31396e-137	-1.13288	0.537	0.836	2.32807e-133	0.642344
Ranbp17	9.67302e-19	-0.364759	0.296	0.461	1.71387e-14	0.642082
Tbc1d5	2.76601e-23	-0.349897	0.294	0.458	4.90081e-19	0.641921
Smchd1	4.85058e-23	-0.454216	0.344	0.536	8.59426e-19	0.641791
Usp24	1.43712e-16	-0.285027	0.257	0.401	2.54628e-12	0.640898
Brd8	2.11349e-20	-0.395049	0.276	0.431	3.74469e-16	0.640371
Srsf3	6.00976e-16	-0.305886	0.263	0.411	1.06481e-11	0.639903
Eprs	4.94681e-16	-0.296754	0.253	0.396	8.76475e-12	0.638889
Fgf12	1.1008e-18	-0.356817	0.275	0.433	1.9504e-14	0.635104
Maml2	3.52652e-115	-0.92385	0.512	0.807	6.24828e-111	0.634448
Farp1	8.68345e-15	-0.337263	0.269	0.424	1.53853e-10	0.634434
Fam135a	8.24725e-17	-0.250162	0.233	0.368	1.46125e-12	0.633152
Tle1	8.24479e-28	-0.510738	0.352	0.556	1.46081e-23	0.633093
Spats2	2.32206e-20	-0.285098	0.219	0.346	4.11423e-16	0.632948
Hdac4	5.4233e-30	-0.444583	0.337	0.533	9.60901e-26	0.63227
Itgb1	2.63275e-17	-0.286054	0.242	0.383	4.66471e-13	0.631854
Naaladl2	2.80832e-25	-0.401313	0.266	0.421	4.97579e-21	0.631829
Aff2	6.36497e-21	-0.369103	0.273	0.433	1.12774e-16	0.630485
Foxj3	1.19763e-11	-0.255779	0.217	0.345	2.12197e-07	0.628985
Tardbp	9.29807e-16	-0.325677	0.261	0.415	1.64743e-11	0.628916
Ilf3	6.41609e-21	-0.278562	0.252	0.401	1.1368e-16	0.628429
Syn2	1.63504e-18	-0.330381	0.245	0.39	2.89696e-14	0.628205
Eri3	8.29094e-17	-0.281338	0.229	0.365	1.46899e-12	0.627397
Mpp7	5.26228e-12	-0.274476	0.229	0.365	9.32371e-08	0.627397
Ctcf	1.42687e-13	-0.273935	0.222	0.354	2.52813e-09	0.627118
Atp13a3	1.41701e-17	-0.339918	0.253	0.404	2.51065e-13	0.626237
Magi3	1.47974e-26	-0.427821	0.303	0.484	2.6218e-22	0.626033
Atp2a2	3.64257e-15	-0.317398	0.253	0.405	6.4539e-11	0.624691
Zfp91	1.05418e-17	-0.353384	0.267	0.428	1.86779e-13	0.623832
Pde10a	1.0522e-14	-0.429289	0.192	0.308	1.86429e-10	0.623376
Baz1b	6.67091e-36	-0.488598	0.336	0.54	1.18195e-31	0.622222
Hs2st1	2.88915e-14	-0.269703	0.227	0.365	5.119e-10	0.621918
Zzz3	3.28514e-16	-0.261197	0.213	0.343	5.82061e-12	0.620991
Fxr1	1.97086e-20	-0.310223	0.25	0.403	3.49197e-16	0.620347
Eef2	1.57022e-22	-0.296671	0.227	0.366	2.78211e-18	0.620218
Glcci1	9.46569e-14	-0.267395	0.189	0.305	1.67713e-09	0.619672
Fam120a	5.57659e-41	-0.429879	0.302	0.488	9.8806e-37	0.618852
Dleu2	2.67731e-29	-0.415299	0.302	0.488	4.74366e-25	0.618852
Rev1	6.39244e-27	-0.297362	0.232	0.375	1.13261e-22	0.618667
Nup98	8.67878e-20	-0.283851	0.228	0.369	1.53771e-15	0.617886
Pnn	3.57665e-16	-0.316284	0.237	0.384	6.33711e-12	0.617187
Bmpr1a	6.01978e-17	-0.368969	0.273	0.443	1.06658e-12	0.616253
Mib1	2.6383e-24	-0.489695	0.316	0.513	4.67454e-20	0.615984
Kcnq3	3.48137e-20	-0.43926	0.251	0.408	6.16829e-16	0.615196
Ivns1abp	3.05853e-28	-0.436597	0.292	0.475	5.41909e-24	0.614737
Ddx3x	8.62084e-27	-0.439055	0.307	0.5	1.52744e-22	0.614
Rai1	4.82334e-62	-0.762229	0.421	0.686	8.54599e-58	0.613703
Hnrnpul1	7.88508e-26	-0.351866	0.25	0.408	1.39708e-21	0.612745
Mir9-3hg	2.18944e-28	-0.465819	0.291	0.476	3.87926e-24	0.611344
Efna5	5.9362e-44	-0.646175	0.344	0.563	1.05178e-39	0.611012
Cdk5rap2	1.5125e-28	-0.518995	0.311	0.509	2.67985e-24	0.611002
Cenpc1	5.83253e-14	-0.2849	0.196	0.321	1.03341e-09	0.610592
Vav2	1.57473e-14	-0.28222	0.215	0.353	2.7901e-10	0.609065
Hnrnpr	8.39256e-23	-0.427999	0.288	0.473	1.48699e-18	0.608879
Pcf11	3.56491e-19	-0.292982	0.185	0.304	6.31631e-15	0.608552
Rnf220	6.47951e-113	-1.4061	0.45	0.74	1.14804e-108	0.608108
Ptch1	1.68498e-225	-1.81013	0.52	0.856	2.98545e-221	0.607477
Chchd3	1.32738e-26	-0.414453	0.294	0.484	2.35186e-22	0.607438
Cdkal1	4.1143e-60	-0.681867	0.388	0.64	7.28971e-56	0.60625
Asxl2	9.24435e-24	-0.390154	0.274	0.452	1.63791e-19	0.606195
Cstf3	2.16398e-14	-0.304242	0.204	0.337	3.83414e-10	0.605341
Sipa1l2	1.78967e-30	-0.457018	0.227	0.375	3.17095e-26	0.605333
Tra2a	4.76242e-29	-0.403199	0.28	0.463	8.43806e-25	0.604751
Ppp4r3a	1.8381e-20	-0.298343	0.215	0.356	3.25674e-16	0.603932
Hnrnpdl	1.37196e-27	-0.371429	0.251	0.416	2.43084e-23	0.603365
Wapl	4.29884e-22	-0.302276	0.216	0.358	7.61669e-18	0.603352
Ncald	1.92076e-42	-0.649459	0.322	0.534	3.4032e-38	0.602996
Abl1	1.48132e-14	-0.25998	0.177	0.294	2.6246e-10	0.602041
Zfhx3	3.3922e-75	-0.733027	0.394	0.655	6.01031e-71	0.601527
Gls	6.0559e-20	-0.299993	0.209	0.348	1.07298e-15	0.600575
Xpo6	2.01067e-21	-0.346592	0.211	0.352	3.56251e-17	0.599432
C2cd3	1.07238e-25	-0.297384	0.197	0.329	1.90005e-21	0.598784
Tlk1	1.18246e-27	-0.40729	0.259	0.433	2.09509e-23	0.598152
Zc3h12c	2.70649e-27	-0.330206	0.205	0.343	4.79537e-23	0.597667
Eml4	1.86327e-17	-0.363298	0.251	0.42	3.30134e-13	0.597619
Fancc	7.02368e-19	-0.312607	0.212	0.355	1.24446e-14	0.597183
Prpf38b	6.90602e-21	-0.285806	0.2	0.335	1.22361e-16	0.597015
Pard3	4.92705e-84	-0.785665	0.422	0.707	8.72975e-80	0.596888
Tasp1	1.07109e-15	-0.287017	0.201	0.337	1.89775e-11	0.596439
Naa15	5.61865e-29	-0.412194	0.261	0.438	9.95513e-25	0.59589
Eif3a	1.53096e-51	-0.541305	0.311	0.524	2.71256e-47	0.593511
Lrch1	1.88307e-13	-0.314498	0.195	0.329	3.33643e-09	0.592705
Btaf1	6.9908e-21	-0.317291	0.211	0.356	1.23863e-16	0.592696
Trerf1	8.14713e-21	-0.339366	0.238	0.402	1.44351e-16	0.59204
Iws1	2.44423e-17	-0.299236	0.193	0.326	4.33069e-13	0.592024
Gm2694	1.10658e-18	-0.320067	0.184	0.311	1.96063e-14	0.59164
Cdk6	3.4367e-190	-1.33301	0.498	0.844	6.08915e-186	0.590047
Rasal2	3.78386e-22	-0.411128	0.256	0.434	6.70423e-18	0.589862
Ankrd10	9.77791e-18	-0.287274	0.178	0.302	1.73245e-13	0.589404
Trim37	1.15636e-21	-0.299827	0.186	0.316	2.04885e-17	0.588607
Prkce	4.14852e-26	-0.564717	0.276	0.469	7.35034e-22	0.588486
Asxl1	2.36206e-24	-0.46682	0.252	0.429	4.1851e-20	0.587412
Phf2	1.14248e-14	-0.293415	0.175	0.298	2.02425e-10	0.587248
Ccnl1	9.33905e-10	-0.258409	0.166	0.283	1.65469e-05	0.586572
Lyst	1.23667e-15	-0.294375	0.187	0.319	2.19113e-11	0.586207
Mcmbp	2.51639e-16	-0.342974	0.194	0.331	4.45854e-12	0.586103
Epha3	2.68702e-11	-0.27143	0.116	0.198	4.76086e-07	0.585858
Ssb	1.26088e-17	-0.288447	0.181	0.309	2.23402e-13	0.58576
mt-Cytb	6.04127e-27	-0.42023	0.255	0.436	1.07039e-22	0.584862
Ppp2ca	3.4723e-17	-0.28437	0.175	0.3	6.15222e-13	0.583333
Lmnb1	3.30912e-23	-0.464472	0.235	0.403	5.86311e-19	0.583126
Brd3	4.35554e-19	-0.320175	0.2	0.343	7.71714e-15	0.58309
Yy1	6.3783e-15	-0.264193	0.161	0.277	1.13011e-10	0.581227
Stk3	4.06817e-25	-0.436604	0.263	0.453	7.20798e-21	0.580574
Sdccag8	5.20106e-09	-0.280489	0.17	0.293	9.21523e-05	0.580205
Prpf39	3.70268e-18	-0.345371	0.203	0.35	6.56041e-14	0.58
Arhgap32	5.43596e-22	-0.43068	0.244	0.421	9.63143e-18	0.579572
Ckap5	3.54864e-34	-0.626167	0.263	0.454	6.28748e-30	0.579295
Acvr2b	7.99412e-21	-0.259129	0.15	0.259	1.4164e-16	0.57915
Canx	1.15071e-16	-0.39417	0.22	0.38	2.03882e-12	0.578947
Tbl1xr1	5.05151e-25	-0.451229	0.257	0.444	8.95026e-21	0.578829
Xpo4	7.10562e-15	-0.299189	0.181	0.313	1.25897e-10	0.578275
Clint1	5.04321e-13	-0.259948	0.163	0.282	8.93555e-09	0.578014
Thrap3	4.59304e-30	-0.469187	0.271	0.469	8.13794e-26	0.577825
Sacs	2.60093e-37	-0.578466	0.3	0.52	4.60834e-33	0.576923
Ccdc88c	3.43367e-16	-0.362283	0.169	0.294	6.08377e-12	0.57483
Brip1os	2.8313e-12	-0.300269	0.166	0.289	5.01649e-08	0.574394
Rapgef4	1.09179e-08	-0.250106	0.089	0.155	0.000193444	0.574193
Smc1a	5.71506e-31	-0.42194	0.24	0.418	1.01259e-26	0.574163
Mdn1	4.90428e-19	-0.431461	0.244	0.425	8.6894e-15	0.574118
H2afy	1.90414e-28	-0.385693	0.221	0.385	3.37375e-24	0.574026
Eif4h	3.38996e-16	-0.278284	0.159	0.277	6.00633e-12	0.574007
Srsf5	7.52885e-13	-0.293589	0.175	0.305	1.33396e-08	0.57377
Xpo1	2.88538e-35	-0.56225	0.304	0.53	5.11232e-31	0.573585
Fhit	4.07276e-19	-0.418415	0.168	0.293	7.21612e-15	0.573379
Eif4b	3.72156e-11	-0.269306	0.151	0.264	6.59385e-07	0.571969
Atp8a1	4.01633e-22	-0.384877	0.222	0.389	7.11614e-18	0.570694
Scaf11	1.25919e-24	-0.405646	0.226	0.397	2.23103e-20	0.569269
Smc5	7.41279e-27	-0.422617	0.243	0.427	1.3134e-22	0.569087
Babam2	3.2412e-23	-0.432695	0.24	0.422	5.74275e-19	0.56872
Phactr4	1.77121e-22	-0.254751	0.149	0.262	3.13823e-18	0.568702
Phf21b	1.05076e-31	-0.501207	0.252	0.444	1.86173e-27	0.567567
Gmds	1.57567e-17	-0.391637	0.189	0.334	2.79176e-13	0.565868
Ptma	2.7083e-23	-0.463923	0.22	0.389	4.79857e-19	0.565553
Ralyl	5.1638e-27	-0.761457	0.19	0.337	9.14923e-23	0.563798
Ubap2	3.41867e-22	-0.416391	0.223	0.396	6.05719e-18	0.563131
Mier1	1.16078e-17	-0.341096	0.173	0.308	2.05667e-13	0.561688
Zdhhc14	3.70607e-19	-0.421819	0.188	0.335	6.56642e-15	0.561194
Adgra3	5.26296e-26	-0.360226	0.183	0.327	9.32492e-22	0.559633
Ghr	1.2137e-14	-0.463002	0.158	0.283	2.15044e-10	0.558304
Lrrc58	1.4433e-19	-0.29005	0.154	0.276	2.55724e-15	0.557971
Snx24	9.28817e-13	-0.274766	0.135	0.242	1.64568e-08	0.557851
Chka	6.53758e-21	-0.277332	0.15	0.269	1.15833e-16	0.557621
Larp1	9.50231e-21	-0.380455	0.189	0.339	1.68362e-16	0.557522
Uri1	5.16165e-22	-0.345551	0.175	0.314	9.14541e-18	0.557325
mt-Nd5	4.21461e-26	-0.46332	0.23	0.413	7.46744e-22	0.556901
Hnrnpl	2.15242e-29	-0.451051	0.224	0.403	3.81367e-25	0.555831
Bcl11a	6.94864e-38	-0.522865	0.254	0.457	1.23116e-33	0.555799
Sfmbt1	3.15339e-29	-0.442995	0.22	0.396	5.58717e-25	0.555555
Srbd1	1.60455e-24	-0.332665	0.176	0.317	2.84294e-20	0.555205
Supt3	4.90997e-17	-0.345469	0.171	0.308	8.69948e-13	0.555195
Snx25	8.85947e-17	-0.276131	0.142	0.256	1.56972e-12	0.554687
Papd5	1.41322e-14	-0.26527	0.137	0.247	2.50395e-10	0.554656
Tjp1	1.35222e-26	-0.354471	0.203	0.366	2.39587e-22	0.554645
Srsf4	5.07823e-17	-0.358535	0.18	0.325	8.99761e-13	0.553846
Chd1	5.39787e-25	-0.363603	0.191	0.345	9.56395e-21	0.553623
Sf1	2.68855e-29	-0.433338	0.223	0.403	4.76358e-25	0.55335
Atp5b	2.0712e-20	-0.266447	0.13	0.235	3.66975e-16	0.553191
Ncl	1.21407e-57	-0.73726	0.323	0.584	2.1511e-53	0.553082
Slc8a3	6.63764e-07	-0.254766	0.089	0.161	0.0117606	0.552795
Alms1	2.75319e-32	-0.454011	0.226	0.409	4.87811e-28	0.552567
Barhl1	8.16794e-39	-0.542082	0.234	0.424	1.4472e-34	0.551887
Zfp516	3.67145e-16	-0.275827	0.133	0.241	6.50507e-12	0.551867
Kcnip4	3.24034e-10	-0.598618	0.128	0.232	5.74124e-06	0.551724
G2e3	7.53992e-25	-0.500165	0.201	0.365	1.33592e-20	0.550685
Gspt1	4.22535e-21	-0.328739	0.169	0.307	7.48648e-17	0.550488
Pam	8.4463e-23	-0.360857	0.168	0.306	1.49652e-18	0.549019
Hnrnpab	1.37107e-20	-0.322684	0.153	0.279	2.42926e-16	0.548387
Ski	7.4177e-30	-0.43741	0.216	0.394	1.31427e-25	0.548223
Gmps	4.0523e-15	-0.26654	0.126	0.23	7.17986e-11	0.547826
Jph1	1.17075e-11	-0.262286	0.126	0.23	2.07433e-07	0.547826
Ptcd3	1.44217e-15	-0.293324	0.145	0.265	2.55523e-11	0.54717
Prmt3	2.20029e-18	-0.294186	0.134	0.245	3.89848e-14	0.546939
Hnrnpd	3.58882e-39	-0.507545	0.245	0.448	6.35867e-35	0.546875
Oxr1	2.21345e-17	-0.337122	0.131	0.24	3.9218e-13	0.545833
Ipo11	9.09948e-25	-0.426145	0.204	0.374	1.61225e-20	0.545454
Nectin3	8.04344e-19	-0.352771	0.157	0.288	1.42514e-14	0.545139
Nup188	8.9526e-21	-0.284524	0.126	0.232	1.58622e-16	0.543103
Atr	5.14525e-26	-0.271559	0.135	0.249	9.11635e-22	0.542168
Nalcn	4.29313e-54	-0.818304	0.309	0.57	7.60657e-50	0.542105
mt-Co1	1.19348e-20	-0.403528	0.184	0.34	2.11462e-16	0.541176
Nup205	1.4564e-12	-0.311106	0.152	0.282	2.58045e-08	0.539007
Sdk1	1.00573e-119	-1.25945	0.388	0.72	1.78196e-115	0.538889
Hspa4	8.29463e-16	-0.329997	0.154	0.286	1.46964e-11	0.538461
Neto2	2.3706e-15	-0.317058	0.141	0.262	4.20022e-11	0.538168
L3mbtl3	1.61968e-22	-0.344068	0.134	0.249	2.86975e-18	0.538152
Cct2	7.49425e-16	-0.262026	0.113	0.21	1.32783e-11	0.538095
Tbc1d16	1.21134e-53	-0.742104	0.297	0.552	2.14625e-49	0.538043
Il1rapl1	1.00443e-42	-0.735314	0.257	0.478	1.77966e-38	0.537657
Cdh12	3.099e-12	-0.334729	0.1	0.186	5.49081e-08	0.537634
Shroom4	1.22729e-17	-0.276885	0.116	0.216	2.17452e-13	0.537037
Cnot10	1.44971e-16	-0.274547	0.133	0.248	2.5686e-12	0.53629
Ccm2	3.75938e-11	-0.252168	0.101	0.189	6.66088e-07	0.534391
Eif4e	5.09301e-16	-0.251145	0.119	0.223	9.02379e-12	0.533632
Epha7	6.88543e-16	-0.306005	0.135	0.253	1.21996e-11	0.533597
Tmcc3	7.56891e-21	-0.277342	0.16	0.3	1.34106e-16	0.533333
Nup160	1.42649e-14	-0.267147	0.12	0.225	2.52746e-10	0.533333
Serbp1	9.63803e-40	-0.586471	0.251	0.471	1.70767e-35	0.532909
Sp1	1.03045e-16	-0.300186	0.13	0.244	1.82575e-12	0.532787
Srsf6	1.39137e-24	-0.345273	0.156	0.293	2.46523e-20	0.532423
Nrf1	2.19326e-35	-0.527068	0.23	0.432	3.88601e-31	0.532407
Spata5	1.5001e-24	-0.441101	0.198	0.372	2.65787e-20	0.532258
Bahcc1	2.01821e-57	-0.808839	0.29	0.545	3.57586e-53	0.53211
Stx6	3.31205e-25	-0.453741	0.188	0.354	5.86829e-21	0.531073
Sf3b3	2.55529e-21	-0.293767	0.13	0.245	4.52746e-17	0.530612
Srsf1	3.95558e-17	-0.263164	0.114	0.215	7.0085e-13	0.530232
Sin3a	8.50277e-16	-0.336297	0.147	0.278	1.50652e-11	0.528777
Brpf1	2.98113e-15	-0.327396	0.14	0.265	5.28197e-11	0.528302
Fgf14	5.38142e-23	-1.18409	0.175	0.332	9.5348e-19	0.527108
Otud4	1.35605e-20	-0.429552	0.187	0.355	2.40266e-16	0.52676
Spred1	1.6849e-19	-0.351623	0.158	0.3	2.9853e-15	0.526666
Tmem196	1.02691e-16	-0.286037	0.099	0.188	1.81948e-12	0.526595
Nfatc3	9.7135e-13	-0.253453	0.109	0.207	1.72104e-08	0.52657
Gm47283	2.10713e-57	-0.868653	0.296	0.563	3.73342e-53	0.525755
Hspa9	8.54354e-16	-0.267359	0.115	0.219	1.51375e-11	0.525114
E2f3	5.67667e-32	-0.52218	0.221	0.421	1.00579e-27	0.52494
Eef1a1	3.69024e-27	-0.523719	0.201	0.383	6.53837e-23	0.524804
Rttn	1.6115e-17	-0.310698	0.142	0.271	2.85526e-13	0.523985
Ahctf1	3.72534e-26	-0.438311	0.18	0.344	6.60055e-22	0.523256
Zfp462	1.94138e-62	-0.786295	0.297	0.568	3.43974e-58	0.522887
U2af2	2.10709e-16	-0.323734	0.141	0.27	3.73334e-12	0.522222
Azin1	2.11441e-18	-0.301502	0.111	0.213	3.74631e-14	0.521127
Set	9.01525e-21	-0.317617	0.127	0.244	1.59732e-16	0.520492
Eif4a2	1.3478e-30	-0.403553	0.166	0.32	2.38804e-26	0.51875
Ftx	3.56247e-17	-0.328394	0.129	0.249	6.31199e-13	0.518072
Gkap1	3.80011e-18	-0.2714	0.101	0.195	6.73304e-14	0.517948
Xrcc4	2.49465e-15	-0.284935	0.116	0.224	4.42002e-11	0.517857
Gng12	5.31766e-21	-0.462544	0.19	0.367	9.42183e-17	0.517711
Vps13a	5.44121e-20	-0.320992	0.132	0.255	9.64074e-16	0.517647
Nup153	1.15673e-36	-0.497451	0.194	0.375	2.0495e-32	0.517333
Kpnb1	2.20105e-25	-0.41181	0.165	0.319	3.89982e-21	0.517241
Tubgcp3	7.08795e-11	-0.264429	0.105	0.203	1.25584e-06	0.517241
Uck2	2.31749e-12	-0.285004	0.123	0.238	4.10613e-08	0.516807
Commd1	1.51693e-16	-0.258145	0.093	0.18	2.68769e-12	0.516666
N4bp2	6.32168e-25	-0.412542	0.174	0.337	1.12008e-20	0.51632
Dtnb	5.22455e-29	-0.408483	0.163	0.316	9.25686e-25	0.515823
Gatad2a	2.25191e-17	-0.305486	0.116	0.225	3.98993e-13	0.515555
Smc6	2.31223e-32	-0.481748	0.193	0.375	4.0968e-28	0.514667
Cherp	7.53313e-12	-0.277488	0.107	0.208	1.33472e-07	0.514423
Ctnnb1	1.8823e-25	-0.401944	0.145	0.282	3.33506e-21	0.514184
Tmem163	9.35775e-118	-1.45801	0.351	0.683	1.65801e-113	0.513909
Cdh18	3.7047e-09	-0.259809	0.058	0.113	6.56398e-05	0.513274
Larp4	7.22119e-14	-0.256835	0.1	0.195	1.27945e-09	0.51282
Akap13	6.79577e-48	-0.626563	0.233	0.455	1.20407e-43	0.512088
Gas2	1.65134e-20	-0.368358	0.13	0.254	2.92585e-16	0.511811
Raly	7.80305e-39	-0.447541	0.176	0.344	1.38254e-34	0.511628
Eftud2	1.65085e-20	-0.262786	0.113	0.221	2.92497e-16	0.511312
Ercc6l2	1.52262e-18	-0.345044	0.136	0.266	2.69778e-14	0.511278
Fgf9	1.64269e-13	-0.302911	0.123	0.241	2.91052e-09	0.510373
Khsrp	5.02877e-18	-0.284611	0.103	0.202	8.90997e-14	0.509901
Pcdh11x	2.80349e-14	-0.258329	0.078	0.153	4.96722e-10	0.509804
Slc29a1	3.78679e-34	-0.578271	0.211	0.414	6.70944e-30	0.509662
Prkag2	1.24369e-22	-0.434854	0.138	0.271	2.20357e-18	0.509225
Ntn1	2.55278e-100	-1.1587	0.367	0.721	4.52302e-96	0.509015
Pcnt	5.95519e-36	-0.447083	0.178	0.35	1.05514e-31	0.508571
Mat2a	1.08034e-18	-0.314904	0.127	0.25	1.91415e-14	0.508
mt-Nd2	2.58886e-13	-0.292625	0.109	0.215	4.58695e-09	0.506977
Mad1l1	2.53809e-26	-0.407443	0.16	0.316	4.49699e-22	0.506329
Lima1	6.36425e-24	-0.26132	0.083	0.164	1.12762e-19	0.506097
Wdr43	3.76222e-27	-0.441329	0.174	0.344	6.6659e-23	0.505814
Rrbp1	4.51711e-14	-0.254354	0.088	0.174	8.00341e-10	0.505747
Esf1	5.54799e-21	-0.255882	0.094	0.186	9.82994e-17	0.505376
Ncor2	3.85221e-260	-1.808	0.428	0.847	6.82535e-256	0.505313
Brd7	1.07793e-26	-0.419965	0.147	0.291	1.90988e-22	0.505154
Senp1	2.51601e-20	-0.364516	0.134	0.266	4.45786e-16	0.503759
Pde4b	1.15665e-66	-0.922876	0.271	0.538	2.04935e-62	0.503717
Xrcc5	2.0602e-20	-0.360851	0.138	0.274	3.65026e-16	0.503649
Pum3	2.29033e-13	-0.265769	0.092	0.183	4.058e-09	0.502732
Gtf3c1	1.71967e-45	-0.683861	0.224	0.446	3.04692e-41	0.502242
Slc20a2	7.41472e-21	-0.335035	0.12	0.239	1.31374e-16	0.502092
Wasf2	9.05684e-21	-0.354921	0.125	0.249	1.60469e-16	0.502008
Rai14	1.45939e-26	-0.45617	0.172	0.343	2.58574e-22	0.501458
Peak1	1.82359e-36	-0.502887	0.191	0.381	3.23105e-32	0.501312
Hnrnpa3	3.00157e-31	-0.434445	0.163	0.326	5.31818e-27	0.5
Ttll4	5.74926e-32	-0.396447	0.152	0.304	1.01865e-27	0.5
Ybx1	6.99515e-20	-0.337804	0.115	0.23	1.2394e-15	0.5
Mum1	1.37385e-16	-0.300704	0.105	0.21	2.43418e-12	0.5
Firre	1.88182e-21	-0.270502	0.099	0.198	3.3342e-17	0.5
Lhfpl3	1.82936e-14	-0.289642	0.071	0.142	3.24127e-10	0.5
Cbx5	6.68491e-73	-0.871417	0.289	0.579	1.18443e-68	0.499136
Tra2b	3.2506e-36	-0.573858	0.206	0.413	5.75941e-32	0.498789
Cep295	2.94189e-26	-0.460073	0.169	0.339	5.21244e-22	0.498525
Hnrnpa1	1.23275e-31	-0.444658	0.165	0.331	2.18419e-27	0.498489
mt-Nd1	6.75684e-29	-0.378787	0.133	0.267	1.19718e-24	0.498127
Zdbf2	1.44593e-25	-0.360654	0.131	0.263	2.5619e-21	0.498099
Lin52	4.08114e-27	-0.339394	0.13	0.261	7.23097e-23	0.498084
Supt16	4.92815e-31	-0.53455	0.194	0.39	8.7317e-27	0.497436
Hspa5	1.38748e-19	-0.382617	0.134	0.27	2.45834e-15	0.496296
Nrip1	1.35868e-21	-0.362535	0.131	0.264	2.40732e-17	0.496212
Dph6	3.03393e-22	-0.328627	0.111	0.224	5.37551e-18	0.495535
Tacc1	5.3671e-22	-0.32933	0.104	0.21	9.50943e-18	0.495238
Fam212b	2.97829e-26	-0.391779	0.142	0.287	5.27694e-22	0.494773
Cenpv	2.72225e-17	-0.269911	0.093	0.188	4.82328e-13	0.494681
Cplx2	1.35631e-28	-0.475107	0.158	0.32	2.4031e-24	0.49375
Slc4a4	9.698e-14	-0.369243	0.073	0.148	1.71829e-09	0.493243
Mta1	2.64957e-19	-0.281038	0.101	0.205	4.6945e-15	0.492683
Zfp800	8.83505e-17	-0.266082	0.088	0.179	1.56539e-12	0.49162
Tgfb2	5.4193e-35	-0.565256	0.172	0.35	9.60192e-31	0.491428
Caln1	2.8487e-20	-0.349012	0.086	0.175	5.04732e-16	0.491428
Fscn1	1.28784e-15	-0.261536	0.085	0.173	2.2818e-11	0.491329
Arl6ip1	6.70569e-19	-0.40616	0.111	0.226	1.18811e-14	0.49115
Eif4a1	9.61625e-23	-0.402915	0.137	0.279	1.70381e-18	0.491039
Srsf7	1.68915e-30	-0.421476	0.145	0.296	2.99284e-26	0.489865
Ptbp1	6.3451e-35	-0.418283	0.142	0.29	1.12423e-30	0.489655
Nxpe4	1.36835e-29	-0.557087	0.182	0.372	2.42444e-25	0.489247
Cep192	9.40085e-32	-0.472126	0.156	0.319	1.66564e-27	0.489028
Msh3	8.9928e-19	-0.356893	0.124	0.254	1.59334e-14	0.488189
Arhgap10	4.3424e-28	-0.393065	0.144	0.295	7.69386e-24	0.488135
Etf1	1.18493e-22	-0.347601	0.121	0.248	2.09946e-18	0.487903
Trps1	5.8387e-89	-0.969886	0.3	0.615	1.0345e-84	0.487805
Rsl1d1	2.77102e-14	-0.268609	0.085	0.175	4.9097e-10	0.485714
Tmem164	1.48742e-30	-0.512997	0.167	0.344	2.63541e-26	0.485465
Nap1l1	2.01277e-33	-0.532118	0.181	0.373	3.56623e-29	0.485255
Pkig	1.57015e-20	-0.264001	0.082	0.169	2.78199e-16	0.485207
Tango6	4.32529e-20	-0.259877	0.079	0.163	7.66355e-16	0.484662
Rad21	5.44869e-35	-0.61308	0.188	0.389	9.65399e-31	0.48329
Sh3pxd2b	1.19901e-11	-0.287039	0.085	0.176	2.12441e-07	0.482954
Dcbld2	2.64557e-21	-0.342149	0.113	0.234	4.68743e-17	0.482906
Tshz3	2.55416e-28	-0.513239	0.157	0.326	4.52547e-24	0.481595
Dpy19l1	1.74631e-10	-0.256408	0.091	0.189	3.09411e-06	0.481481
Wdpcp	1.3388e-23	-0.513041	0.164	0.341	2.37208e-19	0.480938
Cct3	3.65181e-20	-0.278903	0.085	0.177	6.47028e-16	0.480226
Klf13	8.18002e-28	-0.393246	0.127	0.265	1.44934e-23	0.479245
Clic4	3.44378e-26	-0.398098	0.126	0.263	6.10169e-22	0.479087
Qsox1	4.29077e-16	-0.265163	0.08	0.167	7.60238e-12	0.479042
Rassf3	1.03872e-88	-0.904394	0.283	0.591	1.8404e-84	0.478849
Amotl1	3.18747e-18	-0.29446	0.085	0.178	5.64756e-14	0.477528
Simc1	9.55919e-17	-0.31158	0.095	0.199	1.6937e-12	0.477387
Prdm5	3.70669e-17	-0.25361	0.071	0.149	6.56751e-13	0.47651
Stt3b	9.70904e-34	-0.532669	0.17	0.357	1.72025e-29	0.47619
Dgcr8	8.79684e-25	-0.415115	0.128	0.269	1.55862e-20	0.475836
Grid2	2.49479e-176	-1.48865	0.354	0.744	4.42026e-172	0.475806
Ltbp3	4.26313e-22	-0.364874	0.118	0.248	7.55342e-18	0.475806
Nin	6.14588e-48	-0.695131	0.214	0.45	1.08893e-43	0.475555
Csmd2	7.39504e-22	-0.478296	0.107	0.225	1.31025e-17	0.475555
Tmem55a	8.69109e-17	-0.279558	0.086	0.181	1.53989e-12	0.475138
Cacna2d3	5.50805e-46	-0.798856	0.197	0.415	9.75916e-42	0.474699
Rfc1	1.20118e-28	-0.508731	0.158	0.333	2.12825e-24	0.474474
Mpp6	2.53379e-19	-0.344139	0.11	0.232	4.48937e-15	0.474138
Ssr3	4.8755e-20	-0.263127	0.082	0.173	8.63841e-16	0.473988
Ago2	8.60572e-39	-0.555236	0.179	0.378	1.52476e-34	0.473545
Thada	9.73421e-52	-0.578358	0.194	0.41	1.72471e-47	0.473171
Galnt18	1.04916e-08	-0.26998	0.07	0.148	0.00018589	0.472973
Mybbp1a	5.74184e-16	-0.285868	0.085	0.18	1.01734e-11	0.472222
Sfrp1	1.41704e-71	-0.881011	0.244	0.517	2.51072e-67	0.471953
Hsp90b1	1.1909e-34	-0.569931	0.174	0.369	2.11003e-30	0.471545
Jam3	2.02518e-17	-0.267819	0.081	0.172	3.58821e-13	0.47093
Prune2	3.59197e-14	-0.314751	0.064	0.136	6.36424e-10	0.470588
Ssr1	7.88591e-22	-0.342607	0.111	0.236	1.39723e-17	0.470339
Wrn	5.42979e-26	-0.357756	0.11	0.234	9.62051e-22	0.470085
Nucks1	1.06202e-44	-0.600235	0.178	0.379	1.88169e-40	0.469657
Stxbp6	1.72067e-50	-0.631285	0.188	0.401	3.04868e-46	0.468828
Xntrpc	8.49212e-22	-0.280568	0.081	0.173	1.50463e-17	0.468208
Prkdc	3.84317e-25	-0.34171	0.102	0.218	6.80933e-21	0.46789
Abce1	5.62874e-22	-0.336148	0.1	0.214	9.97301e-18	0.46729
Cbfa2t3	1.08122e-120	-1.22823	0.299	0.64	1.91571e-116	0.467187
Srsf10	1.33494e-33	-0.482204	0.148	0.317	2.36525e-29	0.466877
Ncapd2	1.20585e-36	-0.549715	0.156	0.335	2.13652e-32	0.465672
Atl2	4.54269e-20	-0.262323	0.088	0.189	8.04874e-16	0.465608
Mycn	6.77973e-23	-0.392811	0.108	0.232	1.20123e-18	0.465517
Rnf219	2.1636e-13	-0.317068	0.093	0.2	3.83347e-09	0.465
Rpl4	2.23389e-35	-0.472616	0.141	0.304	3.95801e-31	0.463816
Ccnjl	4.8258e-26	-0.396581	0.107	0.231	8.55036e-22	0.463203
Tcp1	3.42785e-17	-0.299312	0.088	0.19	6.07346e-13	0.463158
Casp8ap2	5.64038e-19	-0.381292	0.113	0.244	9.99363e-15	0.463115
Cdyl	9.92985e-31	-0.524082	0.156	0.337	1.75937e-26	0.462908
Terf1	9.23702e-21	-0.335987	0.099	0.214	1.63661e-16	0.462617
Suz12	5.38774e-35	-0.515971	0.16	0.346	9.54599e-31	0.462428
Ptchd4	1.19284e-13	-0.264381	0.06	0.13	2.11347e-09	0.461538
Cdh13	1.6458e-48	-0.780054	0.186	0.404	2.91603e-44	0.460396
Cep83	3.54875e-50	-0.617301	0.18	0.392	6.28768e-46	0.459184
Nup155	7.07834e-25	-0.424196	0.129	0.281	1.25414e-20	0.459075
Adamts6	1.45911e-68	-0.895255	0.246	0.536	2.58525e-64	0.458955
Ntrk3	0	-2.32172	0.399	0.87	0	0.458621
Prkd3	1.21675e-34	-0.488476	0.151	0.33	2.15584e-30	0.457576
Dhx32	1.06437e-20	-0.288457	0.074	0.162	1.88585e-16	0.45679
Crim1	9.73995e-15	-0.346397	0.084	0.184	1.72572e-10	0.456521
Pcdh7	4.23651e-39	-0.699871	0.173	0.379	7.50624e-35	0.456464
Mctp1	7.69077e-19	-0.462995	0.087	0.191	1.36265e-14	0.455497
Prex1	5.12506e-21	-0.38217	0.091	0.2	9.08059e-17	0.455
Gtf2f2	2.79809e-20	-0.331083	0.096	0.211	4.95765e-16	0.454976
Pcdh9	1.47393e-74	-1.24607	0.224	0.493	2.61151e-70	0.454361
Med25	4.56061e-18	-0.3006	0.084	0.185	8.08048e-14	0.454054
Cdh10	3.25594e-10	-0.3044	0.049	0.108	5.76887e-06	0.453703
Usp37	1.25205e-35	-0.524914	0.14	0.309	2.21838e-31	0.453074
Cep290	5.71686e-24	-0.409048	0.115	0.254	1.01291e-19	0.452756
Gas5	2.20652e-27	-0.467425	0.124	0.274	3.90951e-23	0.452555
Ptges3	7.24944e-15	-0.286336	0.076	0.168	1.28446e-10	0.452381
Pabpc1	2.82254e-36	-0.494452	0.137	0.303	5.00098e-32	0.452145
Nr3c1	2.83471e-25	-0.408952	0.117	0.259	5.02254e-21	0.451737
Gm45881	1.41836e-08	-0.258072	0.056	0.124	0.000251305	0.451613
Usp10	1.95216e-24	-0.34952	0.102	0.226	3.45884e-20	0.451327
Fam19a5	4.69021e-33	-0.642415	0.17	0.377	8.31011e-29	0.450928
Ctdspl2	1.29478e-32	-0.472599	0.133	0.295	2.29409e-28	0.450847
Taco1	5.3039e-27	-0.455186	0.096	0.213	9.39745e-23	0.450704
Rps5	5.56566e-24	-0.285228	0.073	0.162	9.86123e-20	0.450617
Hdgf	5.96936e-22	-0.319979	0.084	0.187	1.05765e-17	0.449198
Ntm	2.09046e-146	-1.74315	0.309	0.688	3.70389e-142	0.449128
Galnt2	1.0992e-42	-0.560939	0.145	0.323	1.94757e-38	0.448916
Kcnab1	3.81293e-13	-0.364276	0.07	0.156	6.75576e-09	0.448718
Pkm	4.41775e-14	-0.32289	0.083	0.185	7.82738e-10	0.448648
Dnmt1	3.74595e-34	-0.582176	0.147	0.328	6.63708e-30	0.448171
Rack1	1.80309e-19	-0.294686	0.077	0.172	3.19471e-15	0.447674
Ssrp1	6.09565e-29	-0.354956	0.103	0.231	1.08003e-24	0.445887
Cse1l	9.53475e-21	-0.340356	0.094	0.211	1.68937e-16	0.445497
Tfdp1	6.09157e-29	-0.412356	0.106	0.238	1.07931e-24	0.445378
Nr1d2	1.48795e-19	-0.261786	0.065	0.146	2.63635e-15	0.445205
Map3k14	4.68173e-18	-0.254896	0.065	0.146	8.29509e-14	0.445205
Hspd1	1.83908e-20	-0.275683	0.073	0.164	3.25847e-16	0.445122
Tor1aip2	8.33182e-19	-0.291439	0.077	0.173	1.47623e-14	0.445086
Cadm1	0	-1.95772	0.39	0.877	0	0.444698
Rcc2	3.44593e-21	-0.343991	0.088	0.198	6.1055e-17	0.444444
Tank	8.00051e-20	-0.295189	0.076	0.171	1.41753e-15	0.444444
Ctdspl	5.55066e-21	-0.354843	0.083	0.187	9.83467e-17	0.44385
Lhfp	3.81013e-09	-0.334482	0.047	0.106	6.75079e-05	0.443396
Npat	7.67461e-20	-0.387138	0.105	0.237	1.35979e-15	0.443038
Iqgap2	8.3827e-20	-0.275443	0.077	0.174	1.48525e-15	0.442528
Ccdc57	6.74591e-15	-0.278923	0.069	0.156	1.19524e-10	0.442307
Sgcd	8.13328e-61	-1.12316	0.194	0.439	1.44105e-56	0.441913
Cep57	1.35573e-18	-0.294693	0.076	0.172	2.40208e-14	0.44186
Utp20	1.21043e-21	-0.342442	0.083	0.188	2.14464e-17	0.441489
Spop	1.33094e-35	-0.497689	0.124	0.281	2.35816e-31	0.441281
Car10	5.327e-22	-1.15019	0.09	0.204	9.43838e-18	0.441176
Mcph1	7.50437e-46	-0.713784	0.183	0.416	1.32962e-41	0.439904
Ncapd3	8.82614e-47	-0.598787	0.157	0.357	1.56382e-42	0.439776
Etv6	3.89691e-55	-0.658235	0.175	0.398	6.90455e-51	0.439698
Ccdc34	1.58282e-25	-0.367184	0.096	0.219	2.80443e-21	0.438356
Prdm11	3.05512e-20	-0.353865	0.085	0.194	5.41306e-16	0.438144
G3bp1	1.09037e-25	-0.46198	0.122	0.279	1.93193e-21	0.437276
Hsph1	2.05186e-19	-0.309179	0.076	0.174	3.63549e-15	0.436781
Cep128	6.14401e-44	-0.752356	0.176	0.403	1.0886e-39	0.436724
Rbbp8	2.8278e-26	-0.369434	0.093	0.213	5.01029e-22	0.43662
Hmgb1	8.94181e-40	-0.543229	0.134	0.307	1.58431e-35	0.436482
Paxip1	1.32159e-28	-0.427216	0.106	0.243	2.3416e-24	0.436214
Mcm7	1.07021e-27	-0.388211	0.099	0.227	1.8962e-23	0.436123
Grid2ip	5.34072e-38	-0.521063	0.118	0.271	9.46269e-34	0.435424
Cntrl	5.35534e-35	-0.615245	0.141	0.324	9.4886e-31	0.435185
H2afv	2.94717e-18	-0.30407	0.08	0.184	5.22179e-14	0.434782
Gjc1	4.84617e-27	-0.414597	0.106	0.244	8.58644e-23	0.434426
Asap1	1.66955e-111	-1.18403	0.27	0.622	2.9581e-107	0.434084
Arid5b	1.52628e-27	-0.344303	0.069	0.159	2.70427e-23	0.433962
Esyt1	4.43835e-19	-0.330831	0.074	0.171	7.86386e-15	0.432748
Dpysl4	2.10205e-34	-0.516293	0.122	0.282	3.72441e-30	0.432624
Tom1l1	2.00553e-32	-0.425706	0.102	0.236	3.5534e-28	0.432203
Rnf4	3.47859e-19	-0.314675	0.079	0.183	6.16337e-15	0.431694
Ipo7	4.04756e-37	-0.543536	0.14	0.325	7.17148e-33	0.430769
Scd2	1.0247e-30	-0.485444	0.118	0.274	1.81557e-26	0.430657
Eefsec	8.00809e-24	-0.369938	0.093	0.216	1.41887e-19	0.430555
Tmem245	7.68944e-34	-0.50233	0.127	0.295	1.36241e-29	0.430508
Ifrd1	3.79756e-14	-0.289846	0.068	0.158	6.72851e-10	0.430379
Serinc5	4.83937e-34	-0.58515	0.139	0.323	8.57439e-30	0.43034
Alkbh1	5.58111e-35	-0.462934	0.108	0.251	9.88862e-31	0.430279
Znrf3	2.43845e-69	-0.755928	0.197	0.458	4.32044e-65	0.430131
Plch1	4.58104e-18	-0.346749	0.083	0.193	8.11669e-14	0.430052
Cnbp	1.3584e-25	-0.356855	0.089	0.207	2.40682e-21	0.429951
Rif1	3.51826e-59	-0.832085	0.205	0.477	6.23365e-55	0.429769
Arhgap42	3.49072e-39	-0.49546	0.119	0.277	6.18487e-35	0.429603
Cbfb	6.11845e-42	-0.57574	0.143	0.333	1.08407e-37	0.429429
Hectd2	2.27381e-40	-0.566997	0.136	0.317	4.02874e-36	0.429022
Cntln	1.63499e-47	-0.67189	0.162	0.378	2.89687e-43	0.428571
Atm	1.4581e-37	-0.590504	0.152	0.355	2.58347e-33	0.428169
Srf	6.39571e-19	-0.283743	0.068	0.159	1.13319e-14	0.427673
Rpl13a	2.38322e-26	-0.425886	0.1	0.234	4.22259e-22	0.42735
Nek6	3.51185e-20	-0.345593	0.081	0.19	6.2223e-16	0.426316
Lin9	1.57549e-21	-0.284409	0.072	0.169	2.79145e-17	0.426035
Phkb	2.83937e-45	-0.57475	0.137	0.322	5.03079e-41	0.425466
Pold3	1.17213e-20	-0.390945	0.094	0.221	2.07678e-16	0.425339
Rnf152	7.25074e-15	-0.272442	0.048	0.113	1.28469e-10	0.424778
Pa2g4	5.40815e-32	-0.364666	0.093	0.219	9.58216e-28	0.424657
Mid1	1.23051e-15	-0.36946	0.084	0.198	2.18022e-11	0.424242
B3glct	1.11981e-15	-0.305693	0.072	0.17	1.98409e-11	0.423529
Tbc1d1	5.03267e-27	-0.365388	0.084	0.199	8.91688e-23	0.42211
Myo1e	7.79186e-21	-0.382465	0.086	0.204	1.38056e-16	0.421568
Syne1	8.37618e-22	-0.830666	0.104	0.247	1.48409e-17	0.421052
Fkbp3	6.78255e-17	-0.273324	0.064	0.152	1.20173e-12	0.421052
Ptch2	8.57326e-77	-1.00004	0.21	0.499	1.51901e-72	0.420842
Cenpj	1.0223e-28	-0.357991	0.083	0.198	1.81132e-24	0.419192
Naca	3.63776e-23	-0.332313	0.075	0.179	6.44538e-19	0.418994
Dars	1.46977e-18	-0.284823	0.062	0.148	2.60414e-14	0.418919
Rrp1b	9.68113e-17	-0.294454	0.067	0.16	1.7153e-12	0.41875
Tanc1	9.54375e-17	-0.285689	0.059	0.141	1.69096e-12	0.418439
Rpn2	6.1158e-21	-0.307686	0.074	0.177	1.0836e-16	0.418079
Chsy3	2.27269e-19	-0.405432	0.073	0.175	4.02676e-15	0.417143
Trp53	2.02534e-21	-0.358867	0.078	0.187	3.5885e-17	0.417112
Epb41l3	2.10701e-17	-0.351762	0.075	0.18	3.73321e-13	0.416666
Sept9	1.52393e-28	-0.358754	0.07	0.168	2.70009e-24	0.416666
Mre11a	1.16926e-16	-0.299649	0.067	0.161	2.0717e-12	0.416149
Eif5a	1.56873e-15	-0.283131	0.057	0.137	2.77947e-11	0.416058
Tpcn1	7.09323e-62	-0.765048	0.179	0.431	1.25678e-57	0.415313
Dnmt3a	5.72319e-32	-0.517593	0.118	0.285	1.01403e-27	0.414035
Wdr35	1.372e-23	-0.305435	0.065	0.157	2.43091e-19	0.414012
Lrp5	4.23483e-31	-0.394342	0.084	0.203	7.50327e-27	0.413793
Timm23	8.26432e-18	-0.265476	0.055	0.133	1.46427e-13	0.413534
Eef1g	2.18543e-20	-0.331105	0.074	0.179	3.87214e-16	0.413408
Pms1	2.05161e-21	-0.37014	0.081	0.197	3.63504e-17	0.411167
Jun	5.51523e-43	-0.656969	0.134	0.326	9.77189e-39	0.411043
Flrt2	4.8167e-59	-0.752754	0.165	0.402	8.53423e-55	0.410448
Utp14a	7.33618e-12	-0.260001	0.055	0.134	1.29982e-07	0.410447
Arhgap31	1.13922e-56	-0.620417	0.128	0.312	2.01848e-52	0.410256
Aim2	4.14256e-18	-0.363965	0.059	0.144	7.33979e-14	0.409722
Ift74	1.59272e-26	-0.33971	0.07	0.171	2.82198e-22	0.409356
Abcc1	1.08599e-23	-0.443028	0.094	0.23	1.92415e-19	0.408695
Nasp	1.95308e-84	-0.947889	0.207	0.507	3.46047e-80	0.408284
Trpm3	2.98097e-29	-0.733956	0.089	0.219	5.28169e-25	0.406393
Rnf157	2.45602e-20	-0.354678	0.069	0.17	4.35158e-16	0.405882
Taf1d	1.58023e-49	-0.752162	0.158	0.39	2.79984e-45	0.405128
Itgb3bp	5.61239e-16	-0.259008	0.049	0.121	9.94403e-12	0.404958
Ezr	2.77491e-32	-0.507489	0.104	0.257	4.91658e-28	0.404669
Sdad1	1.72863e-16	-0.257419	0.053	0.131	3.06279e-12	0.40458
Ncaph2	2.42421e-25	-0.305716	0.064	0.159	4.29521e-21	0.402515
Abr	6.8316e-31	-0.47774	0.097	0.241	1.21042e-26	0.402489
Qtrt2	5.77277e-13	-0.278295	0.055	0.137	1.02282e-08	0.40146
Ift80	2.64497e-31	-0.451615	0.097	0.242	4.68635e-27	0.400826
Cux2	2.96149e-53	-0.684283	0.139	0.347	5.24717e-49	0.400576
Traf3	9.88309e-34	-0.483131	0.098	0.245	1.75109e-29	0.4
Cep68	1.23083e-19	-0.310693	0.059	0.148	2.18079e-15	0.398648
Psat1	2.28161e-14	-0.27833	0.057	0.143	4.04256e-10	0.398601
Gm26883	3.88042e-37	-0.524811	0.108	0.271	6.87533e-33	0.398524
Anp32e	2.72344e-30	-0.503131	0.101	0.254	4.82539e-26	0.397638
Lrrtm3	6.73501e-22	-0.606784	0.064	0.161	1.19331e-17	0.397515
Dtx1	9.73673e-14	-0.368228	0.064	0.161	1.72515e-09	0.397515
Rgs20	5.94273e-68	-0.908803	0.169	0.426	1.05293e-63	0.396714
Eif2s2	1.09067e-19	-0.354087	0.067	0.169	1.93246e-15	0.396449
Itsn2	4.22957e-26	-0.437933	0.082	0.207	7.49396e-22	0.396135
Naa50	4.42579e-20	-0.340477	0.068	0.172	7.84162e-16	0.395349
Pfas	1.33049e-20	-0.338471	0.066	0.167	2.35736e-16	0.395209
Npm1	1.27188e-33	-0.546134	0.113	0.286	2.25352e-29	0.395105
Rad50	6.87943e-18	-0.335584	0.062	0.157	1.2189e-13	0.394904
Zbtb1	4.19765e-19	-0.311145	0.058	0.147	7.4374e-15	0.394558
Ybx3	1.29741e-30	-0.428211	0.086	0.218	2.29876e-26	0.394495
Fkbp5	3.98303e-22	-0.376542	0.069	0.175	7.05714e-18	0.394285
Pus7	2.59809e-20	-0.258516	0.05	0.127	4.6033e-16	0.3937
Hjurp	1.53595e-94	-1.14664	0.21	0.534	2.7214e-90	0.393258
Adk	9.49783e-87	-0.950422	0.193	0.491	1.68282e-82	0.393075
Ebf2	1.47895e-56	-0.915969	0.147	0.374	2.62041e-52	0.393048
Immp2l	8.63747e-28	-0.526438	0.077	0.196	1.53039e-23	0.392857
Ulk4	3.50004e-34	-0.486848	0.093	0.237	6.20138e-30	0.392405
Rps26	1.70978e-23	-0.272379	0.049	0.125	3.02938e-19	0.392
Epb41l2	5.73177e-45	-0.665393	0.132	0.337	1.01556e-40	0.391691
Rnd3	1.1866e-68	-0.804169	0.164	0.419	2.10242e-64	0.391408
Alcam	8.11012e-81	-1.09163	0.205	0.524	1.43695e-76	0.391221
Dek	5.50664e-54	-0.748172	0.147	0.376	9.75666e-50	0.390957
Inpp5a	1.86061e-28	-0.447023	0.093	0.238	3.29662e-24	0.390756
Prim2	5.07461e-48	-0.704652	0.132	0.338	8.99119e-44	0.390532
Pola1	2.01591e-87	-1.21056	0.216	0.554	3.57179e-83	0.389892
Vgll4	1.10237e-31	-0.537682	0.106	0.272	1.95318e-27	0.389706
Snx5	1.93079e-28	-0.478511	0.09	0.231	3.42098e-24	0.38961
Tmpo	1.1552e-78	-0.905838	0.177	0.455	2.04678e-74	0.389011
Vat1l	2.03376e-21	-0.478776	0.07	0.18	3.60341e-17	0.388889
Rftn2	5.60679e-41	-0.642433	0.118	0.304	9.93411e-37	0.388158
Cltb	1.90065e-18	-0.289529	0.052	0.134	3.36758e-14	0.388059
Tbata	5.63634e-34	-0.498044	0.083	0.214	9.98646e-30	0.38785
Sae1	5.85229e-26	-0.575517	0.114	0.294	1.03691e-21	0.387755
Nolc1	6.13028e-30	-0.364768	0.069	0.178	1.08616e-25	0.38764
Galnt7	2.54756e-19	-0.356923	0.065	0.168	4.51377e-15	0.386905
Mettl15	2.21017e-35	-0.463953	0.089	0.231	3.91598e-31	0.385281
Gnl3	1.14257e-39	-0.552847	0.099	0.257	2.0244e-35	0.385214
Bcl2	1.47514e-27	-0.431298	0.077	0.2	2.61365e-23	0.385
Rftn1	5.17187e-104	-1.09682	0.211	0.549	9.16352e-100	0.384335
Vrk1	4.77935e-24	-0.369526	0.073	0.19	8.46805e-20	0.38421
Rbbp7	7.55513e-32	-0.409212	0.076	0.199	1.33862e-27	0.381909
Ssbp2	1.45181e-118	-1.213	0.229	0.6	2.57232e-114	0.381667
Mthfd1	7.02566e-30	-0.387601	0.069	0.181	1.24481e-25	0.381215
Sgpp2	1.33208e-20	-0.283275	0.046	0.121	2.36018e-16	0.380165
Phldb2	4.809e-24	-0.378785	0.063	0.166	8.52059e-20	0.379518
Lrrc8c	2.09289e-26	-0.380768	0.066	0.174	3.70819e-22	0.37931
Gart	2.28089e-13	-0.275236	0.047	0.124	4.04128e-09	0.379032
Hnrnpf	1.19439e-32	-0.36216	0.064	0.169	2.11623e-28	0.378698
Rps18	1.58161e-14	-0.254797	0.042	0.111	2.80229e-10	0.378378
Klhl13	1.46628e-22	-0.435625	0.073	0.193	2.59796e-18	0.378238
Vars	6.88029e-17	-0.295264	0.059	0.156	1.21905e-12	0.378205
Rpsa	2.95074e-30	-0.460251	0.079	0.209	5.22813e-26	0.37799
Tmem132e	7.61279e-27	-0.408723	0.068	0.18	1.34883e-22	0.377778
Epb41l5	1.12879e-25	-0.421606	0.074	0.196	1.99999e-21	0.377551
Ska2	8.15131e-21	-0.353192	0.069	0.183	1.44425e-16	0.377049
Ddx21	3.63279e-25	-0.415419	0.072	0.191	6.43658e-21	0.376963
Mpdz	1.23432e-68	-0.771608	0.151	0.402	2.18697e-64	0.375622
Nkd1	2.46044e-75	-0.964802	0.16	0.426	4.35941e-71	0.375587
Rangap1	3.54798e-22	-0.420993	0.078	0.208	6.28631e-18	0.375
Phka1	5.84884e-28	-0.398257	0.073	0.195	1.0363e-23	0.374359
Xpot	3.07744e-18	-0.270983	0.046	0.123	5.45261e-14	0.373983
Ccp110	2.40739e-29	-0.456055	0.086	0.23	4.26541e-25	0.373913
Polr1a	4.52165e-32	-0.392622	0.068	0.182	8.01145e-28	0.373626
Tead2	2.24187e-24	-0.520195	0.093	0.249	3.97214e-20	0.373494
Pou3f2	1.40631e-23	-0.464402	0.079	0.212	2.49169e-19	0.372641
Pmepa1	9.90118e-18	-0.321732	0.049	0.132	1.75429e-13	0.371212
Ece1	1.53756e-22	-0.371068	0.059	0.159	2.72424e-18	0.371069
Ndc1	6.10932e-22	-0.301492	0.057	0.154	1.08245e-17	0.37013
Fam60a	1.7104e-17	-0.346874	0.058	0.157	3.0305e-13	0.369427
Gria3	2.26532e-66	-0.84185	0.144	0.391	4.0137e-62	0.368286
Pank1	3.8804e-12	-0.275673	0.047	0.128	6.87529e-08	0.367187
Sgms1	1.07713e-33	-0.535268	0.089	0.243	1.90846e-29	0.366255
Egr1	1.35692e-26	-0.571296	0.082	0.224	2.4042e-22	0.366071
Nt5dc1	3.10707e-23	-0.327525	0.049	0.134	5.50511e-19	0.365671
Gm16070	5.09528e-21	-0.303269	0.043	0.118	9.02781e-17	0.364406
Gstcd	1.26172e-33	-0.503981	0.087	0.239	2.23551e-29	0.364017
Nop58	1.78607e-50	-0.657805	0.118	0.325	3.16455e-46	0.363077
Gm29478	6.35991e-21	-0.380652	0.05	0.138	1.12685e-16	0.362319
Blm	4.11404e-43	-0.574864	0.098	0.271	7.28925e-39	0.361623
Wipf1	1.42994e-15	-0.310642	0.047	0.13	2.53357e-11	0.361538
Bcor	4.92147e-17	-0.322278	0.048	0.133	8.71985e-13	0.360902
Plekho2	6.15891e-18	-0.359346	0.05	0.139	1.09124e-13	0.359712
Irs1	2.17314e-127	-1.25775	0.2	0.557	3.85037e-123	0.359066
Ranbp1	3.15298e-21	-0.324365	0.048	0.134	5.58645e-17	0.358209
Pxdn	7.85101e-19	-0.315609	0.053	0.148	1.39104e-14	0.358108
Nedd1	5.95113e-28	-0.339559	0.055	0.154	1.05442e-23	0.357143
Per2	2.50316e-17	-0.298516	0.046	0.129	4.4351e-13	0.356589
Haus6	1.31229e-28	-0.442203	0.074	0.208	2.32511e-24	0.355769
Pkp4	3.07979e-86	-1.03256	0.162	0.458	5.45678e-82	0.353712
Diaph2	2.8337e-90	-0.985413	0.158	0.448	5.02075e-86	0.352678
Smc4	2.75018e-83	-1.12639	0.159	0.452	4.87277e-79	0.35177
Sema3e	1.30862e-36	-0.640755	0.089	0.254	2.31862e-32	0.350394
Ubr7	2.11132e-15	-0.252537	0.036	0.103	3.74084e-11	0.349514
Lin54	2.75214e-22	-0.316672	0.051	0.146	4.87624e-18	0.349315
Spns2	1.13119e-16	-0.283841	0.037	0.106	2.00424e-12	0.349056
Ero1lb	1.37844e-16	-0.345589	0.045	0.129	2.44233e-12	0.348837
Pcx	1.68453e-27	-0.555022	0.076	0.218	2.98465e-23	0.348624
C1ql1	1.12642e-27	-0.477394	0.069	0.198	1.99579e-23	0.348485
Ipo5	4.2625e-43	-0.507641	0.078	0.224	7.5523e-39	0.348214
Dkc1	3.27313e-22	-0.274921	0.042	0.121	5.79933e-18	0.347107
Itga9	1.24741e-29	-0.491563	0.052	0.15	2.21016e-25	0.346666
Atad5	3.38639e-51	-0.755897	0.113	0.327	6e-47	0.345566
Homer2	2.71414e-42	-0.611498	0.096	0.278	4.80891e-38	0.345324
Mcm9	3.68662e-29	-0.401525	0.058	0.168	6.53195e-25	0.345238
Mtbp	8.13102e-28	-0.503229	0.078	0.226	1.44065e-23	0.345133
Itpr1	1.48146e-52	-0.660468	0.101	0.293	2.62484e-48	0.34471
Arhgap26	6.54033e-27	-0.514848	0.061	0.177	1.15882e-22	0.344633
Spidr	2.09004e-31	-0.489345	0.072	0.209	3.70314e-27	0.344497
Mpp5	1.20634e-22	-0.380191	0.053	0.154	2.13739e-18	0.344156
Skp2	1.50272e-23	-0.358899	0.054	0.157	2.66251e-19	0.343949
Alg13	1.84615e-23	-0.398025	0.059	0.172	3.27101e-19	0.343023
Dpyd	4.62511e-26	-0.469089	0.062	0.181	8.19477e-22	0.342541
Cep152	2.66944e-39	-0.499594	0.077	0.225	4.72972e-35	0.342222
Mdga2	4.49839e-50	-0.981955	0.118	0.346	7.97024e-46	0.34104
Topbp1	2.37498e-41	-0.596007	0.091	0.268	4.20798e-37	0.339552
Itgb8	4.47118e-32	-0.538466	0.077	0.227	7.92204e-28	0.339207
Fndc3b	3.25812e-32	-0.48266	0.07	0.207	5.77273e-28	0.338164
Kirrel3	1.97999e-25	-1.26653	0.048	0.142	3.50814e-21	0.338028
Cep57l1	3.8993e-20	-0.326497	0.049	0.145	6.90878e-16	0.337931
Limd1	6.81148e-22	-0.254023	0.034	0.101	1.20686e-17	0.336633
Eps8	3.94611e-16	-0.415988	0.038	0.113	6.99172e-12	0.336283
Kctd8	6.12135e-52	-0.950363	0.095	0.283	1.08458e-47	0.335689
Cep112	1.38146e-38	-0.648016	0.085	0.254	2.44766e-34	0.334646
Nup210	1.58969e-60	-0.688028	0.101	0.302	2.81661e-56	0.334437
Cmtm4	6.10218e-56	-0.703802	0.106	0.317	1.08119e-51	0.334385
Dab1	6.69884e-21	-0.398515	0.043	0.129	1.1869e-16	0.333333
Prkg1	5.02214e-19	-0.426169	0.042	0.126	8.89824e-15	0.333333
Sh3rf1	3.14096e-27	-0.296947	0.04	0.12	5.56516e-23	0.333333
Paics	4.45883e-16	-0.277648	0.034	0.102	7.90015e-12	0.333333
Sema7a	3.83953e-137	-1.36002	0.186	0.559	6.80289e-133	0.332737
Lig1	5.20655e-40	-0.610667	0.078	0.235	9.22497e-36	0.331915
Clip4	3.42099e-35	-0.419292	0.06	0.181	6.06131e-31	0.331492
Efs	2.00377e-14	-0.280019	0.038	0.115	3.55027e-10	0.330434
Lap3	7.91299e-19	-0.261065	0.034	0.103	1.40202e-14	0.330097
Slbp	3.88759e-12	-0.261216	0.034	0.103	6.88803e-08	0.330097
Igf2bp3	7.0307e-30	-0.470048	0.059	0.179	1.2457e-25	0.329609
Slco3a1	1.92244e-22	-0.409396	0.051	0.156	3.40618e-18	0.326923
Lrp8	1.21597e-25	-0.429162	0.05	0.153	2.15446e-21	0.326797
Greb1l	4.13176e-67	-0.841584	0.097	0.298	7.32066e-63	0.325503
Mob3b	4.53018e-36	-0.611255	0.08	0.246	8.02657e-32	0.325203
Airn	7.30401e-72	-0.974508	0.119	0.366	1.29412e-67	0.325137
Igdcc4	1.143e-87	-0.968213	0.144	0.443	2.02516e-83	0.325056
Dock10	1.90463e-43	-0.655667	0.083	0.256	3.37463e-39	0.324219
Lpin2	1.31756e-68	-0.921824	0.126	0.389	2.33445e-64	0.323907
Boc	2.25252e-238	-1.86951	0.232	0.717	3.99102e-234	0.32357
Pola2	1.04871e-22	-0.40865	0.05	0.156	1.8581e-18	0.320513
Mef2c	7.06876e-29	-0.464708	0.056	0.175	1.25244e-24	0.32
Itpr2	5.03198e-29	-0.366024	0.042	0.132	8.91567e-25	0.318182
Meis2	5.49691e-25	-0.4822	0.039	0.123	9.73943e-21	0.317073
Baz1a	1.183e-73	-0.76734	0.103	0.325	2.09604e-69	0.316923
Rbms3	1.58412e-77	-0.976479	0.123	0.389	2.80674e-73	0.316195
Nop56	2.75844e-59	-0.631984	0.083	0.263	4.8874e-55	0.315589
Sdc2	8.3838e-21	-0.323247	0.035	0.111	1.48544e-16	0.315315
Mki67	5.64042e-148	-2.01559	0.174	0.553	9.99369e-144	0.314647
Pdzrn4	1.25473e-85	-1.0679	0.127	0.404	2.22313e-81	0.314356
Med12l	2.41362e-128	-1.27337	0.165	0.525	4.27645e-124	0.314286
Map3k20	1.03896e-30	-0.435606	0.053	0.169	1.84083e-26	0.313609
Cdc7	4.82242e-21	-0.316045	0.042	0.134	8.54437e-17	0.313433
Acer3	1.28768e-30	-0.513371	0.056	0.179	2.28151e-26	0.312849
B4galt1	1.48286e-20	-0.295051	0.035	0.112	2.62733e-16	0.3125
Katnal2	2.25038e-18	-0.303312	0.034	0.109	3.98722e-14	0.311926
Ppp2r5a	4.43346e-20	-0.269001	0.031	0.101	7.85521e-16	0.30693
Draxin	4.58984e-201	-1.56908	0.204	0.665	8.13228e-197	0.306767
Sipa1l1	1.53941e-30	-0.456105	0.053	0.173	2.72753e-26	0.306358
Wdhd1	5.72773e-38	-0.479645	0.054	0.177	1.01484e-33	0.305085
Hat1	6.71569e-26	-0.413941	0.048	0.158	1.18989e-21	0.303797
Lrig3	1.81981e-140	-1.33902	0.164	0.541	3.22434e-136	0.303142
Pde7b	1.72736e-27	-0.527025	0.046	0.152	3.06054e-23	0.302631
Vcl	7.65816e-42	-0.655873	0.073	0.243	1.35687e-37	0.300411
Ctps	1.21386e-31	-0.459776	0.054	0.18	2.15072e-27	0.3
Dhfr	5.30842e-17	-0.337393	0.036	0.12	9.40546e-13	0.3
Galnt16	1.15175e-13	-0.261775	0.03	0.1	2.04068e-09	0.3
Rad18	2.48507e-45	-0.588336	0.071	0.237	4.40305e-41	0.299578
Rpa1	3.817e-27	-0.46691	0.05	0.167	6.76296e-23	0.299401
Fam210b	5.9026e-21	-0.431799	0.043	0.144	1.04582e-16	0.298611
Obscn	2.01794e-45	-0.918461	0.072	0.242	3.57538e-41	0.297521
Tbc1d31	9.43501e-32	-0.392807	0.046	0.155	1.6717e-27	0.296774
Mb21d2	2.62414e-52	-0.731552	0.08	0.27	4.64946e-48	0.296296
Brca2	1.96027e-48	-0.644929	0.074	0.25	3.47321e-44	0.296
Il4i1	3.68306e-19	-0.30047	0.034	0.115	6.52564e-15	0.295652
Svil	1.03538e-61	-0.827666	0.091	0.308	1.83449e-57	0.295454
Pard3b	6.15389e-178	-1.58998	0.174	0.589	1.09035e-173	0.295416
Ldlrad3	3.08054e-31	-0.422609	0.042	0.143	5.4581e-27	0.293706
Hist1h1e	5.31902e-35	-0.456517	0.046	0.157	9.42423e-31	0.292993
Amd1	7.97789e-32	-0.350753	0.038	0.13	1.41352e-27	0.292307
Cep135	1.20104e-44	-0.578627	0.067	0.23	2.128e-40	0.291304
Dusp10	4.35434e-24	-0.494047	0.045	0.155	7.71501e-20	0.290322
Abtb2	2.31373e-49	-0.800863	0.078	0.269	4.09946e-45	0.289963
Rpl3	4.00057e-26	-0.407639	0.042	0.145	7.08821e-22	0.289655
Gpc1	3.42802e-27	-0.351431	0.035	0.121	6.07376e-23	0.289256
Rhoq	7.88026e-30	-0.403926	0.041	0.142	1.39622e-25	0.288732
Phldb1	2.7796e-35	-0.504731	0.056	0.194	4.9249e-31	0.28866
Usp1	4.77449e-34	-0.405159	0.045	0.156	8.45944e-30	0.288461
Cdh4	5.6795e-174	-1.9555	0.174	0.604	1.00629e-169	0.288079
Atp10a	1.88004e-23	-0.353819	0.035	0.122	3.33105e-19	0.286885
Mast4	4.90675e-22	-0.350021	0.032	0.112	8.69378e-18	0.285714
Fstl1	1.20748e-31	-0.484146	0.048	0.169	2.13941e-27	0.284024
Btbd11	3.41625e-256	-2.18564	0.204	0.719	6.05291e-252	0.283727
Cdh8	6.74885e-77	-1.02796	0.101	0.356	1.19576e-72	0.283708
Tspan12	4.01423e-22	-0.326759	0.032	0.113	7.11241e-18	0.283186
Cyp39a1	5.23789e-22	-0.291076	0.032	0.113	9.2805e-18	0.283186
Pitpnm2	3.62369e-64	-0.860907	0.092	0.325	6.42046e-60	0.283077
Chsy1	5.26654e-49	-0.718599	0.076	0.269	9.33126e-45	0.282528
Cep89	2.33299e-25	-0.40042	0.036	0.128	4.1336e-21	0.28125
Epha5	3.78349e-43	-0.687046	0.061	0.217	6.70359e-39	0.281106
Elmsan1	6.19418e-63	-0.756701	0.077	0.274	1.09748e-58	0.281022
Prmt8	7.99415e-145	-1.48136	0.145	0.518	1.4164e-140	0.279923
Wdr76	2.55346e-29	-0.418532	0.041	0.147	4.52421e-25	0.278911
Eda	7.53186e-16	-0.403456	0.032	0.115	1.3345e-11	0.278261
Islr2	7.75614e-39	-0.568971	0.057	0.205	1.37423e-34	0.278049
Gsg1l	0	-2.50997	0.217	0.791	0	0.274336
Hpca	6.56291e-55	-0.674849	0.064	0.235	1.16282e-50	0.27234
Adamts17	1.54061e-30	-0.477294	0.04	0.147	2.72965e-26	0.272109
Ntng2	8.36278e-29	-0.473817	0.044	0.162	1.48172e-24	0.271605
Timeless	2.02906e-34	-0.419613	0.041	0.151	3.59509e-30	0.271523
Nectin1	1.15115e-27	-0.445938	0.039	0.144	2.03961e-23	0.270833
Mdc1	1.1697e-42	-0.550755	0.055	0.204	2.07247e-38	0.269608
Pprc1	2.17872e-24	-0.352113	0.031	0.115	3.86026e-20	0.269565
Smc2	1.45275e-105	-1.42101	0.131	0.487	2.57398e-101	0.268994
Mcm4	2.53992e-29	-0.378094	0.032	0.119	4.50023e-25	0.268907
Mmp14	8.24084e-31	-0.396671	0.036	0.134	1.46011e-26	0.268657
Mindy4	2.73834e-27	-0.322079	0.03	0.112	4.8518e-23	0.267857
Cerk	1.81778e-50	-0.725347	0.07	0.263	3.22073e-46	0.26616
Hmgn2	4.70806e-28	-0.308556	0.03	0.113	8.34174e-24	0.265486
Pold1	3.44834e-20	-0.298305	0.027	0.102	6.10977e-16	0.264706
Pald1	3.23069e-42	-0.579067	0.05	0.189	5.72413e-38	0.26455
Mms22l	3.59979e-71	-0.904509	0.085	0.322	6.37811e-67	0.263975
Zranb3	1.6978e-39	-0.580736	0.052	0.197	3.00817e-35	0.263959
Unc80	2.30899e-50	-0.62085	0.055	0.209	4.09106e-46	0.263158
Spats2l	2.07401e-30	-0.426356	0.035	0.133	3.67473e-26	0.263158
Zgrf1	8.75348e-66	-0.736359	0.069	0.264	1.55094e-61	0.261364
Pqlc1	5.34119e-60	-0.757732	0.068	0.261	9.46353e-56	0.260536
Msn	1.00359e-26	-0.376262	0.032	0.123	1.77816e-22	0.260162
Sept8	4.02399e-32	-0.507467	0.043	0.166	7.1297e-28	0.259036
Gm13483	9.42277e-25	-0.430688	0.033	0.128	1.66953e-20	0.257812
Mybl1	1.44347e-19	-0.298584	0.026	0.101	2.55753e-15	0.257425
Slc7a1	1.06047e-49	-0.724813	0.066	0.257	1.87895e-45	0.256809
Rrm1	1.03426e-38	-0.577923	0.052	0.203	1.8325e-34	0.256158
Gm11541	3.34004e-35	-0.505759	0.044	0.172	5.91787e-31	0.255814
Hirip3	6.2864e-31	-0.398448	0.037	0.145	1.11383e-26	0.255172
Asic2	3.45142e-36	-1.28137	0.038	0.149	6.11523e-32	0.255033
Prkd1	8.70959e-88	-1.14941	0.091	0.358	1.54317e-83	0.25419
Usp13	4.11546e-23	-0.36174	0.031	0.122	7.29177e-19	0.254098
Rfx2	6.7167e-25	-0.418488	0.033	0.13	1.19006e-20	0.253846
Ppat	2.60686e-27	-0.425949	0.036	0.142	4.61883e-23	0.253521
Cenpf	3.58645e-78	-1.24295	0.081	0.32	6.35448e-74	0.253125
Gli2	2.62782e-231	-2.05466	0.166	0.658	4.65597e-227	0.25228
Racgap1	4.56398e-49	-0.681047	0.06	0.238	8.08646e-45	0.252101
Gpc6	1.00789e-213	-2.12126	0.156	0.622	1.78578e-209	0.250804
Dbf4	5.02792e-30	-0.409536	0.037	0.148	8.90847e-26	0.25
Samd4	6.60306e-44	-0.661967	0.048	0.193	1.16993e-39	0.248705
Rexo5	1.10313e-21	-0.340104	0.029	0.117	1.95453e-17	0.247863
Ddr2	1.54923e-81	-0.939723	0.082	0.331	2.74492e-77	0.247734
Ptprm	7.71617e-44	-0.664539	0.05	0.202	1.36715e-39	0.247525
Fat1	9.77606e-69	-0.785892	0.067	0.272	1.73212e-64	0.246323
Grik1	1.42048e-28	-0.553637	0.034	0.139	2.5168e-24	0.244604
Gnai2	1.73434e-31	-0.543304	0.043	0.176	3.07291e-27	0.244318
Disp3	3.11572e-75	-0.910717	0.074	0.305	5.52043e-71	0.242623
Igf2bp1	1.98434e-25	-0.39122	0.03	0.124	3.51585e-21	0.241935
Polq	9.9815e-59	-0.722521	0.059	0.245	1.76852e-54	0.240816
Hk2	6.56682e-52	-0.599778	0.047	0.196	1.16351e-47	0.239796
Pex5l	4.30191e-67	-0.906757	0.07	0.293	7.62213e-63	0.238908
Dock1	3.3956e-252	-1.99885	0.164	0.689	6.01632e-248	0.238026
Anp32b	1.07568e-58	-0.721539	0.059	0.249	1.9059e-54	0.236948
Ror2	1.52466e-73	-0.93318	0.071	0.301	2.7014e-69	0.23588
Rbl1	5.57509e-47	-0.571216	0.047	0.201	9.87794e-43	0.233831
Srebf1	9.85069e-62	-0.669701	0.05	0.214	1.74535e-57	0.233645
Hells	5.586e-47	-0.798673	0.057	0.245	9.89728e-43	0.232653
Nek7	6.62058e-79	-0.971122	0.077	0.331	1.17304e-74	0.232628
Fbxl7	4.14628e-39	-0.629825	0.038	0.164	7.34638e-35	0.231707
Tenm3	2.14943e-102	-1.24325	0.088	0.38	3.80836e-98	0.231579
Kcnh5	8.74417e-76	-1.00779	0.073	0.317	1.54929e-71	0.230284
Tspan11	1.44206e-26	-0.366046	0.025	0.109	2.55504e-22	0.229358
Pole	2.31866e-53	-0.667912	0.049	0.215	4.1082e-49	0.227907
Cenpe	3.39825e-87	-1.32026	0.077	0.338	6.02102e-83	0.227811
Wwc1	4.87539e-50	-0.72384	0.046	0.202	8.63821e-46	0.227723
Prex2	4.44439e-29	-0.399011	0.025	0.11	7.87458e-25	0.227273
Sorl1	5.9723e-28	-0.376999	0.024	0.106	1.05817e-23	0.226415
Bora	3.33666e-44	-0.569103	0.04	0.177	5.9119e-40	0.225989
Smoc1	2.21061e-135	-1.63312	0.108	0.478	3.91676e-131	0.225941
Pcna	6.92537e-37	-0.41837	0.029	0.129	1.22704e-32	0.224806
Syt13	1.46917e-58	-0.636364	0.044	0.196	2.60307e-54	0.22449
Ust	7.558e-182	-1.64566	0.12	0.535	1.33913e-177	0.224299
Efcab11	3.37761e-76	-0.869722	0.058	0.259	5.98445e-72	0.223938
Fos	8.78718e-35	-0.518375	0.032	0.143	1.55691e-30	0.223776
Ccdc18	1.02562e-41	-0.583881	0.041	0.185	1.81719e-37	0.221622
Thsd4	2.92274e-56	-1.0791	0.057	0.258	5.17852e-52	0.22093
Dtl	1.16909e-62	-0.887585	0.062	0.281	2.0714e-58	0.22064
Nsmf	1.04691e-29	-0.359736	0.024	0.109	1.85491e-25	0.220183
Usp44	1.53902e-32	-0.350764	0.025	0.114	2.72683e-28	0.219298
St3gal4	4.30129e-59	-0.668887	0.047	0.215	7.62102e-55	0.218605
Bcar3	2.48686e-43	-0.645316	0.04	0.183	4.40622e-39	0.218579
Slc44a5	4.13624e-30	-0.543348	0.033	0.151	7.32859e-26	0.218543
Grin3a	1.72134e-60	-0.840598	0.053	0.244	3.04987e-56	0.217213
Fosb	2.77477e-78	-1.09605	0.065	0.3	4.91633e-74	0.216667
Prom1	4.41419e-30	-0.400098	0.026	0.12	7.82106e-26	0.216666
Prim1	7.19407e-26	-0.389924	0.026	0.12	1.27464e-21	0.216666
Rtkn2	1.01504e-35	-0.471025	0.032	0.148	1.79844e-31	0.216216
Tspan18	1.15035e-57	-0.817646	0.049	0.227	2.03819e-53	0.215859
Pdia5	4.11168e-27	-0.351975	0.022	0.102	7.28507e-23	0.215686
Ttf2	1.6145e-25	-0.328507	0.022	0.102	2.86058e-21	0.215686
St6galnac5	5.05734e-22	-0.435982	0.022	0.102	8.96059e-18	0.215686
Bmpr1b	1.15834e-37	-0.574295	0.034	0.159	2.05235e-33	0.213836
Ncapg2	1.58008e-56	-0.743133	0.05	0.234	2.79958e-52	0.213675
Tnfaip8	3.09796e-85	-1.00043	0.064	0.3	5.48896e-81	0.213333
Chaf1a	2.58981e-28	-0.343591	0.023	0.108	4.58862e-24	0.212963
Lockd	2.42266e-48	-0.639794	0.042	0.198	4.29248e-44	0.212121
Sash1	1.47521e-37	-0.517979	0.033	0.156	2.61378e-33	0.211538
Sparcl1	1.29037e-26	-0.395401	0.023	0.109	2.28627e-22	0.211009
Eln	1.36479e-58	-0.969639	0.051	0.242	2.41813e-54	0.210744
Adcyap1r1	1.72258e-31	-0.462098	0.029	0.138	3.05207e-27	0.210145
Eya4	1.25298e-116	-1.28052	0.083	0.4	2.22002e-112	0.2075
Cenpp	3.31785e-112	-1.36576	0.081	0.391	5.87856e-108	0.207161
Fut10	4.85554e-24	-0.354879	0.022	0.107	8.60305e-20	0.205607
Cenpk	2.6593e-38	-0.457311	0.028	0.137	4.71175e-34	0.204379
Clip1	1.08775e-60	-0.647679	0.039	0.191	1.92727e-56	0.204188
Notch2	1.94034e-53	-0.69207	0.044	0.216	3.43789e-49	0.203704
Kif20b	2.95556e-83	-1.06239	0.06	0.296	5.23667e-79	0.202703
Acot7	4.40362e-42	-0.49785	0.03	0.149	7.80233e-38	0.201342
Palld	1.58949e-38	-0.620416	0.032	0.159	2.81626e-34	0.201258
Top2a	7.5668e-145	-1.76767	0.088	0.439	1.34069e-140	0.200456
Atad2	2.69078e-84	-1.14235	0.068	0.34	4.76753e-80	0.2
Kif24	1.4557e-40	-0.653386	0.041	0.205	2.57921e-36	0.2
Pcgf5	1.10271e-37	-0.601931	0.034	0.17	1.95379e-33	0.2
Hs6st2	9.73421e-38	-0.574984	0.029	0.145	1.72471e-33	0.2
Shank2	6.17549e-35	-0.4756	0.027	0.135	1.09417e-30	0.2
Nhs	3.20342e-129	-1.40604	0.079	0.397	5.67581e-125	0.198992
Lrfn2	2.42803e-27	-0.510209	0.024	0.122	4.30198e-23	0.196721
Arhgef10	1.04366e-24	-0.35353	0.02	0.102	1.84916e-20	0.196078
Mcm5	1.18967e-39	-0.508505	0.029	0.148	2.10786e-35	0.195946
Cdca7	3.59623e-26	-0.366534	0.02	0.103	6.3718e-22	0.194175
Zfp367	4.94201e-34	-0.466625	0.026	0.134	8.75624e-30	0.19403
Tmtc1	7.08981e-91	-1.12189	0.063	0.326	1.25617e-86	0.193251
Ncaph	8.98272e-34	-0.470071	0.028	0.145	1.59156e-29	0.193103
Cdca7l	3.77653e-23	-0.388817	0.022	0.115	6.69125e-19	0.191304
Mcc	3.51304e-38	-0.44397	0.022	0.116	6.22441e-34	0.189655
Adamts19	5.34362e-36	-0.512889	0.022	0.116	9.46783e-32	0.189655
Apcdd1	4.13284e-37	-0.485146	0.025	0.132	7.32257e-33	0.189394
Pvt1	3.98026e-115	-1.22928	0.07	0.37	7.05223e-111	0.189189
Pdlim3	1.46332e-131	-1.5641	0.076	0.404	2.59271e-127	0.188119
Rad51ap1	1.30189e-37	-0.440823	0.024	0.128	2.30668e-33	0.1875
Ddx11	3.99064e-33	-0.417328	0.024	0.128	7.07061e-29	0.1875
Grb10	5.02845e-60	-0.854839	0.041	0.22	8.90941e-56	0.186364
Smco4	3.06757e-47	-0.613401	0.034	0.183	5.43512e-43	0.185792
Kif18a	1.76654e-65	-0.757416	0.04	0.218	3.12996e-61	0.183486
Hmgb2	4.77799e-47	-0.559069	0.031	0.169	8.46565e-43	0.183432
Mcm6	1.40413e-61	-0.651803	0.034	0.186	2.48784e-57	0.182796
Kitl	2.96156e-61	-0.73614	0.038	0.208	5.2473e-57	0.182692
Stk17b	2.62336e-27	-0.398881	0.021	0.115	4.64807e-23	0.182609
Lama2	1.9815e-80	-1.1267	0.047	0.258	3.51082e-76	0.18217
Nr3c2	1.24279e-131	-1.50571	0.073	0.401	2.20198e-127	0.182045
Col4a2	1.83409e-51	-0.843479	0.034	0.187	3.24965e-47	0.181818
Brca1	2.58477e-55	-0.767957	0.041	0.227	4.57969e-51	0.180617
Rad51b	4.11055e-135	-1.6103	0.076	0.421	7.28307e-131	0.180523
Rad54b	8.21579e-46	-0.605577	0.033	0.183	1.45567e-41	0.180328
Zwilch	4.08034e-33	-0.416138	0.022	0.122	7.22955e-29	0.180328
Thsd7b	1.13014e-41	-0.816712	0.026	0.145	2.00238e-37	0.17931
E2f7	5.60948e-47	-0.731026	0.038	0.212	9.93888e-43	0.179245
Tcf7l2	7.00755e-59	-0.781313	0.037	0.207	1.2416e-54	0.178744
Pou6f2	3.22402e-34	-0.529432	0.021	0.118	5.71232e-30	0.177966
Mcm3	1.91372e-29	-0.418807	0.02	0.113	3.39073e-25	0.176991
Ccnd1	2.59093e-143	-1.36397	0.071	0.402	4.59062e-139	0.176617
Etv1	1.13773e-34	-0.482296	0.021	0.119	2.01583e-30	0.17647
Mcm10	9.10557e-33	-0.406542	0.021	0.119	1.61332e-28	0.17647
Incenp	3.75756e-74	-0.870646	0.044	0.25	6.65764e-70	0.176
Epb41l4b	1.34001e-62	-0.840041	0.038	0.216	2.37423e-58	0.175926
Rad51	6.80136e-28	-0.367684	0.019	0.109	1.20506e-23	0.174312
Aspm	4.06448e-99	-1.40346	0.054	0.311	7.20145e-95	0.173633
Kif11	1.28254e-109	-1.31963	0.059	0.34	2.2724e-105	0.173529
Diaph3	2.7782e-162	-1.82052	0.08	0.462	4.92242e-158	0.17316
Ablim2	2.83449e-38	-0.603606	0.027	0.156	5.02215e-34	0.173077
Fanci	1.50285e-26	-0.3686	0.018	0.104	2.66275e-22	0.173077
Col4a1	4.54461e-50	-0.813834	0.032	0.185	8.05214e-46	0.172973
Arhgap11a	1.20297e-53	-0.590761	0.029	0.168	2.13143e-49	0.172619
Bard1	1.06001e-52	-0.584496	0.028	0.164	1.87812e-48	0.170732
Adamts1	7.36396e-52	-0.629979	0.029	0.17	1.30475e-47	0.170588
Kank1	1.77104e-46	-0.764993	0.031	0.182	3.13792e-42	0.17033
Brip1	3.06258e-56	-0.672882	0.032	0.188	5.42628e-52	0.170213
Tyms	3.33427e-30	-0.382477	0.018	0.106	5.90766e-26	0.169811
Cklf	4.76962e-58	-0.668087	0.034	0.201	8.45082e-54	0.169154
Mns1	4.60933e-33	-0.389728	0.019	0.113	8.1668e-29	0.168141
Suclg2	5.98484e-32	-0.417243	0.019	0.113	1.06039e-27	0.168141
Tacc3	3.66663e-55	-0.621643	0.03	0.179	6.49653e-51	0.167598
Tcf7l1	7.10016e-34	-0.485169	0.02	0.121	1.25801e-29	0.165289
Fanca	2.01204e-37	-0.495657	0.023	0.14	3.56494e-33	0.164286
Whrn	2.40846e-116	-1.26767	0.056	0.342	4.26732e-112	0.163743
Mis18bp1	9.55749e-63	-0.849644	0.036	0.22	1.6934e-58	0.163636
Nde1	1.23227e-26	-0.370368	0.018	0.11	2.18333e-22	0.163636
Mastl	2.64185e-49	-0.488763	0.023	0.141	4.68084e-45	0.16312
Ckap2l	7.28179e-46	-0.615752	0.028	0.172	1.29019e-41	0.162791
Knl1	1.75152e-109	-1.33785	0.056	0.345	3.10334e-105	0.162319
Fat3	9.01396e-146	-1.62165	0.069	0.426	1.59709e-141	0.161972
Cdc45	2.73055e-36	-0.374433	0.017	0.105	4.83799e-32	0.161905
Anln	2.89342e-71	-0.830446	0.037	0.231	5.12656e-67	0.160173
Tpx2	1.94445e-84	-0.995614	0.041	0.256	3.44518e-80	0.160156
Slc7a5	3.13931e-34	-0.453248	0.02	0.125	5.56224e-30	0.16
Mum1l1	3.0744e-33	-0.394164	0.017	0.107	5.44722e-29	0.158878
Prkcq	1.33582e-42	-0.566217	0.023	0.146	2.3668e-38	0.157534
Kif15	1.18733e-111	-1.38811	0.057	0.363	2.10372e-107	0.157025
Ckap2	3.15199e-52	-0.616155	0.027	0.172	5.5847e-48	0.156977
Pclaf	3.19517e-47	-0.614267	0.026	0.166	5.6612e-43	0.156626
Plekha7	1.04561e-31	-0.446215	0.018	0.115	1.85262e-27	0.156522
Adcy2	3.53813e-60	-0.857554	0.03	0.192	6.26885e-56	0.15625
Gas2l3	1.21689e-25	-0.408792	0.017	0.109	2.15609e-21	0.155963
Csgalnact1	4.6059e-37	-0.584454	0.021	0.135	8.16073e-33	0.155555
Cit	5.15496e-87	-1.14806	0.048	0.309	9.13355e-83	0.15534
Cacnb2	3.62572e-60	-0.878104	0.03	0.195	6.42405e-56	0.153846
Angptl2	8.79386e-57	-0.715987	0.03	0.196	1.5581e-52	0.153061
Prr11	6.64884e-48	-0.457934	0.02	0.131	1.17804e-43	0.152672
Foxm1	1.00206e-40	-0.47316	0.021	0.138	1.77545e-36	0.152174
Col18a1	1.14755e-43	-0.623286	0.02	0.132	2.03323e-39	0.151515
Rmi2	8.96887e-34	-0.489888	0.019	0.126	1.5891e-29	0.150794
Vsx2	1.90025e-40	-0.689048	0.025	0.166	3.36685e-36	0.150602
Adamts20	2.79618e-97	-1.00714	0.041	0.273	4.95426e-93	0.150183
Kpna2	1.86802e-37	-0.43283	0.018	0.12	3.30976e-33	0.15
Wee1	1.88825e-38	-0.518241	0.022	0.147	3.3456e-34	0.14966
Dgkb	1.54198e-74	-1.09687	0.037	0.248	2.73207e-70	0.149193
Exo1	1.97525e-38	-0.444323	0.018	0.121	3.49975e-34	0.14876
Plscr4	1.20343e-47	-0.550615	0.022	0.148	2.13224e-43	0.148649
Clspn	1.54166e-59	-0.750494	0.03	0.202	2.73151e-55	0.148515
Cenpi	1.14209e-40	-0.458166	0.02	0.135	2.02356e-36	0.148148
Gpc3	1.40161e-40	-0.557788	0.018	0.122	2.48337e-36	0.147541
Plk4	1.27174e-44	-0.531307	0.023	0.157	2.25326e-40	0.146497
Uhrf1	6.05992e-45	-0.504025	0.02	0.137	1.0737e-40	0.145985
Pde1a	1.78114e-31	-0.501914	0.016	0.11	3.15582e-27	0.145454
Ttc23	4.67278e-36	-0.46195	0.017	0.117	8.27923e-32	0.145299
Jag1	8.70409e-34	-0.480529	0.018	0.124	1.54219e-29	0.145161
Sorcs2	1.2281e-102	-1.31887	0.047	0.324	2.17594e-98	0.145062
Rgma	2.26305e-85	-0.997928	0.038	0.263	4.00967e-81	0.144487
Angpt1	4.99506e-53	-0.70921	0.023	0.16	8.85025e-49	0.14375
Prc1	1.98916e-70	-0.802479	0.029	0.202	3.52439e-66	0.143564
Ect2	1.41146e-81	-0.941015	0.034	0.238	2.50083e-77	0.142857
Hist1h1b	5.30468e-49	-0.585234	0.021	0.147	9.39883e-45	0.142857
Adgrv1	1.92507e-33	-0.594391	0.018	0.126	3.41084e-29	0.142857
Bub1b	1.97503e-55	-0.633757	0.024	0.17	3.49935e-51	0.141176
Neil3	5.33686e-80	-0.929699	0.034	0.241	9.45585e-76	0.141079
Kntc1	4.90342e-65	-0.802175	0.031	0.222	8.68788e-61	0.13964
Kif23	1.49466e-76	-0.85509	0.03	0.215	2.64824e-72	0.139535
Ticrr	3.65405e-48	-0.557723	0.021	0.151	6.47424e-44	0.139073
Cdca8	3.34116e-32	-0.355286	0.014	0.101	5.91987e-28	0.138614
Myb	2.57478e-26	-0.373973	0.014	0.101	4.562e-22	0.138614
Hhip	2.81961e-110	-1.32509	0.043	0.312	4.99579e-106	0.13782
Gli3	1.37795e-59	-0.814715	0.026	0.189	2.44145e-55	0.137566
Adamts12	3.56001e-58	-0.745528	0.023	0.168	6.30763e-54	0.136905
Knstrn	1.49765e-41	-0.517809	0.019	0.139	2.65354e-37	0.136691
Loxl1	2.15893e-32	-0.429616	0.014	0.103	3.82519e-28	0.135922
Dlgap5	1.02546e-45	-0.537622	0.019	0.14	1.81691e-41	0.135714
Kif4	1.77335e-82	-0.995049	0.035	0.259	3.14202e-78	0.135135
Ncapg	2.52066e-66	-0.74774	0.027	0.2	4.4661e-62	0.135
Smad3	6.64511e-88	-1.06114	0.036	0.267	1.17738e-83	0.134831
Esco2	3.95453e-46	-0.529798	0.019	0.141	7.00663e-42	0.134752
Lrrn2	6.23879e-40	-0.498177	0.017	0.127	1.10539e-35	0.133858
Stil	8.48689e-49	-0.546113	0.021	0.157	1.50371e-44	0.133758
Ccnf	2.91769e-48	-0.589308	0.021	0.157	5.16956e-44	0.133758
Nusap1	1.20578e-58	-0.64751	0.023	0.173	2.1364e-54	0.132948
Kif14	1.4395e-55	-0.698268	0.023	0.173	2.55051e-51	0.132948
Hmmr	9.77013e-50	-0.625688	0.021	0.158	1.73107e-45	0.132911
Mamdc2	6.21202e-70	-0.873086	0.028	0.211	1.10065e-65	0.132701
Sgo2a	1.14289e-40	-0.564625	0.02	0.152	2.02497e-36	0.131579
Gpr153	1.48924e-98	-0.989329	0.036	0.277	2.63863e-94	0.129964
Akna	2.44518e-51	-0.625513	0.02	0.155	4.33237e-47	0.129032
Adamts14	1.29492e-108	-1.15472	0.038	0.296	2.29434e-104	0.128378
Nuf2	4.17803e-47	-0.517707	0.018	0.141	7.40263e-43	0.127659
Lama5	4.26649e-88	-1.08442	0.031	0.243	7.55936e-84	0.127572
Shcbp1	2.17769e-37	-0.438869	0.015	0.119	3.85842e-33	0.12605
Kif22	1.29748e-53	-0.510598	0.017	0.136	2.29887e-49	0.125
Gm48530	7.63722e-61	-0.671724	0.021	0.169	1.35316e-56	0.12426
Calcrl	4.18183e-39	-0.512876	0.015	0.122	7.40937e-35	0.122951
Sgo1	2.38945e-34	-0.422474	0.014	0.114	4.23362e-30	0.122807
Ttk	4.5429e-53	-0.641029	0.021	0.172	8.04911e-49	0.122093
Fancd2	4.67355e-43	-0.487132	0.015	0.128	8.2806e-39	0.117187
Bub1	3.1119e-67	-0.718766	0.022	0.188	5.51366e-63	0.117021
Cdca2	8.46849e-85	-0.979671	0.028	0.243	1.50045e-80	0.115226
Gli1	6.62153e-111	-1.10877	0.033	0.297	1.1732e-106	0.111111
Parpbp	1.13422e-43	-0.490583	0.014	0.126	2.00961e-39	0.111111
Depdc1a	5.87673e-35	-0.429978	0.012	0.108	1.04124e-30	0.111111
Troap	6.47237e-35	-0.427818	0.012	0.108	1.14677e-30	0.111111
E2f8	2.79318e-36	-0.372637	0.011	0.1	4.94896e-32	0.11
Cenpa	5.9488e-40	-0.494301	0.013	0.119	1.05401e-35	0.109244
Kif2c	7.66283e-31	-0.38701	0.011	0.101	1.3577e-26	0.108911
Spag5	3.81261e-52	-0.598448	0.017	0.157	6.75518e-48	0.10828
Ndc80	2.33508e-54	-0.61284	0.017	0.158	4.13729e-50	0.107595
Ccna2	3.39607e-37	-0.415391	0.012	0.114	6.01715e-33	0.105263
Cep55	2.71358e-34	-0.407707	0.011	0.105	4.80792e-30	0.104762
Melk	1.98109e-42	-0.523789	0.014	0.135	3.51009e-38	0.103704
Espl1	1.82067e-41	-0.489961	0.013	0.132	3.22586e-37	0.0984848
Kif18b	1.33074e-58	-0.609098	0.015	0.155	2.35781e-54	0.0967741
Depdc1b	2.29586e-52	-0.642361	0.015	0.157	4.06781e-48	0.0955413
Aurkb	1.74684e-43	-0.417517	0.01	0.108	3.09505e-39	0.0925925
Cdk1	1.42425e-58	-0.559765	0.013	0.145	2.52348e-54	0.0896551
Iqgap3	9.35094e-55	-0.562252	0.012	0.141	1.6568e-50	0.0851063

## Sheet: cluster 5
gene	p_val	avg_log2FC	fraction + in cluster	fraction + not in cluster	p_val_adj	ratio + in:out of cluster
Pif1	3.83664e-159	1.272	0.406	0.053	6.79776e-155	7.66036
Fam83d	1.69217e-61	0.557333	0.162	0.026	2.99819e-57	6.23075
Psrc1	7.52602e-57	0.576038	0.172	0.028	1.33346e-52	6.14284
Troap	3.1929e-145	1.22357	0.427	0.074	5.65719e-141	5.77026
Cenpa	3.21437e-168	1.30075	0.467	0.082	5.69521e-164	5.69512
Gas2l3	6.13385e-143	1.21311	0.423	0.076	1.0868e-138	5.56578
Plk1	1.75846e-77	0.776603	0.255	0.046	3.11564e-73	5.54347
Ube2c	6.38388e-80	0.72006	0.232	0.042	1.1311e-75	5.5238
Ccnb1	3.1153e-112	1.00826	0.34	0.062	5.51969e-108	5.48386
Cdc20	6.2621e-65	0.68915	0.223	0.041	1.10952e-60	5.43901
Cdc25c	4.8521e-109	0.992205	0.341	0.063	8.59696e-105	5.41269
Nek2	9.60955e-85	0.828184	0.282	0.053	1.70262e-80	5.32074
Sapcd2	5.53565e-31	0.321623	0.101	0.019	9.80806e-27	5.31576
Smtn	3.35885e-49	0.60064	0.191	0.037	5.95121e-45	5.16215
Aurka	3.12766e-67	0.789394	0.26	0.051	5.54159e-63	5.09803
Hmmr	7.60925e-203	1.4661	0.568	0.113	1.34821e-198	5.02654
Kpna2	1.21275e-125	1.14561	0.428	0.086	2.14876e-121	4.97674
Pimreg	2.77817e-33	0.354066	0.117	0.024	4.92236e-29	4.87498
Parpbp	4.94119e-126	1.22027	0.44	0.091	8.7548e-122	4.83516
Depdc1a	6.24981e-119	1.06898	0.377	0.079	1.10734e-114	4.77215
Dlgap5	9.23744e-151	1.26885	0.477	0.102	1.63669e-146	4.67647
Gtse1	3.40725e-46	0.527239	0.182	0.039	6.03696e-42	4.66665
Kif14	2.23172e-215	1.46384	0.588	0.127	3.95416e-211	4.62992
Kif2c	2.66571e-107	0.951278	0.34	0.074	4.7231e-103	4.59459
Neurl1b	3.79405e-86	0.823849	0.274	0.06	6.7223e-82	4.56666
Cep55	7.87468e-100	0.949862	0.349	0.077	1.39524e-95	4.53246
Knstrn	1.01727e-156	1.19374	0.464	0.103	1.80239e-152	4.50485
Kif18b	1.59914e-173	1.30366	0.512	0.114	2.83335e-169	4.49122
Kifc5b	2.5917e-61	0.672424	0.231	0.052	4.59198e-57	4.4423
Cep89	1.95536e-126	1.23703	0.426	0.096	3.46451e-122	4.4375
Depdc1b	3.30977e-169	1.28964	0.513	0.116	5.86424e-165	4.42241
Kif20a	2.8842e-62	0.662641	0.227	0.052	5.11023e-58	4.36538
Kifc1	2.91642e-78	0.835499	0.301	0.07	5.16731e-74	4.29999
Prc1	7.03552e-246	1.55973	0.649	0.151	1.24655e-241	4.29801
Ccnf	8.32033e-148	1.2685	0.503	0.118	1.4742e-143	4.26271
Arhgap19	9.81031e-39	0.544947	0.179	0.042	1.73819e-34	4.26189
Kif23	5.99739e-238	1.62433	0.679	0.161	1.06262e-233	4.21739
Bora	1.38628e-177	1.36155	0.554	0.134	2.45622e-173	4.13433
Cdca3	2.17056e-31	0.382249	0.124	0.03	3.84581e-27	4.13332
Sgo2a	5.52253e-133	1.17393	0.471	0.114	9.78483e-129	4.13158
Cenpl	3.40151e-45	0.509565	0.172	0.042	6.0268e-41	4.09523
Cdc25b	3.98121e-45	0.65899	0.233	0.057	7.05391e-41	4.08771
Arhgap18	8.22362e-44	0.551772	0.171	0.042	1.45706e-39	4.07142
Ccnb2	1.16166e-30	0.409109	0.144	0.036	2.05823e-26	3.99999
Mis18bp1	1.48925e-240	1.57464	0.671	0.168	2.63866e-236	3.99405
Arhgap11a	8.16686e-150	1.2071	0.511	0.128	1.447e-145	3.99218
Bub1b	2.14067e-150	1.2123	0.509	0.13	3.79283e-146	3.91538
Prr11	5.11656e-107	1.00123	0.39	0.1	9.06551e-103	3.9
Spdl1	1.42874e-39	0.557585	0.195	0.05	2.53144e-35	3.89999
Kif22	3.05173e-110	1.02743	0.405	0.104	5.40705e-106	3.89423
Tpx2	3.30671e-285	1.66929	0.753	0.197	5.85882e-281	3.82233
Cks2	2.0874e-31	0.41662	0.151	0.04	3.69846e-27	3.77499
Nusap1	9.41856e-134	1.20405	0.5	0.133	1.66878e-129	3.7594
Sgo1	3.98289e-85	0.828755	0.328	0.088	7.05688e-81	3.72727
Ect2	6.7002e-232	1.49725	0.685	0.184	1.18714e-227	3.72282
Kif18a	5.39095e-198	1.40611	0.627	0.169	9.55169e-194	3.71006
Ckap2	6.2905e-130	1.14808	0.49	0.133	1.11455e-125	3.68421
Cdca2	1.05039e-213	1.48084	0.688	0.188	1.86107e-209	3.65957
Cdk1	1.18079e-110	0.981378	0.409	0.112	2.09212e-106	3.65178
Ckap2l	1.61952e-133	1.14782	0.488	0.134	2.86947e-129	3.64179
Miip	1.42814e-34	0.477559	0.174	0.048	2.53038e-30	3.62499
Espl1	1.37648e-78	0.892653	0.369	0.102	2.43884e-74	3.61764
Ankle1	3.54909e-37	0.5706	0.201	0.056	6.28828e-33	3.58928
Rtkn2	6.76117e-102	1.00376	0.416	0.116	1.19794e-97	3.5862
Aspm	0	2.06511	0.871	0.243	0	3.58436
Ccna2	1.2053e-68	0.787268	0.313	0.088	2.13556e-64	3.55681
Cdca8	3.27703e-73	0.702863	0.28	0.079	5.80624e-69	3.5443
Tacc3	3.15982e-135	1.12431	0.495	0.14	5.59857e-131	3.53571
Spag5	8.46413e-98	0.98965	0.43	0.122	1.49967e-93	3.52459
Aurkb	1.69512e-71	0.767943	0.295	0.084	3.00341e-67	3.5119
Anln	4.03976e-173	1.35667	0.629	0.181	7.15764e-169	3.47514
Hyls1	4.10472e-31	0.478348	0.163	0.047	7.27274e-27	3.46808
Ccdc148	3.44655e-19	0.349368	0.106	0.031	6.10661e-15	3.41934
Birc5	1.09371e-44	0.532505	0.198	0.058	1.93783e-40	3.41379
Ska3	3.37991e-40	0.519827	0.198	0.058	5.98852e-36	3.41379
Kif20b	3.6041e-299	1.69636	0.795	0.234	6.38574e-295	3.39743
Ttk	1.32469e-129	1.05081	0.461	0.136	2.34708e-125	3.3897
Cenpf	0	2.02337	0.86	0.255	0	3.37255
Ska1	4.16279e-27	0.445892	0.158	0.047	7.37563e-23	3.36169
H2afx	3.35641e-21	0.334658	0.124	0.037	5.94689e-17	3.35134
Kif4	5.55546e-227	1.40459	0.683	0.204	9.84316e-223	3.34804
Nuf2	2.16955e-88	0.860788	0.371	0.111	3.844e-84	3.34234
Nde1	5.14271e-55	0.688002	0.289	0.087	9.11186e-51	3.32184
Dbf4	7.58075e-88	0.900441	0.392	0.119	1.34316e-83	3.29411
Arl6ip1	2.66852e-174	1.40621	0.607	0.186	4.72809e-170	3.26344
Ndc80	2.67266e-96	0.921516	0.407	0.125	4.73543e-92	3.256
Cenpe	0	1.94349	0.882	0.271	0	3.25461
Lockd	7.78819e-137	1.13501	0.513	0.158	1.37991e-132	3.24683
Trim59	9.63879e-49	0.586227	0.232	0.072	1.7078e-44	3.22222
Spc25	9.79505e-38	0.609286	0.238	0.074	1.73549e-33	3.21621
Bub1	1.2389e-114	1.02289	0.482	0.15	2.19509e-110	3.21333
Kif11	0	1.62658	0.841	0.274	0	3.06934
Shcbp1	1.60153e-56	0.697336	0.291	0.095	2.83759e-52	3.06315
Foxm1	1.0747e-69	0.739683	0.337	0.112	1.90415e-65	3.00893
Iqgap3	7.23684e-63	0.773806	0.34	0.113	1.28222e-58	3.00885
Incenp	2.53856e-153	1.18249	0.607	0.202	4.49782e-149	3.00495
Mad2l1	3.12875e-25	0.37545	0.151	0.051	5.54351e-21	2.96078
Knl1	2.88568e-290	1.55483	0.825	0.279	5.11284e-286	2.95699
Chek2	6.5794e-30	0.535346	0.221	0.075	1.16574e-25	2.94666
Efcab11	4.53813e-175	1.26996	0.622	0.212	8.04067e-171	2.93396
Gpsm2	6.10689e-44	0.599872	0.266	0.091	1.08202e-39	2.92307
Fzr1	3.92612e-39	0.486542	0.213	0.073	6.95629e-35	2.9178
Mastl	4.83868e-70	0.772245	0.335	0.115	8.57317e-66	2.91304
Ncapg	2.62928e-97	0.949846	0.47	0.162	4.65855e-93	2.90123
Gm13791	4.87472e-50	0.57905	0.222	0.077	8.63704e-46	2.88311
Ccdc18	1.36091e-98	0.940989	0.435	0.152	2.41127e-94	2.86184
Cit	4.8478e-203	1.35716	0.719	0.252	8.58932e-199	2.85317
Racgap1	6.96099e-134	1.07155	0.558	0.196	1.23335e-129	2.84694
Kctd9	1.63932e-28	0.449286	0.187	0.066	2.90455e-24	2.83333
Gen1	1.36725e-34	0.483867	0.2	0.072	2.42249e-30	2.77777
Pbk	6.60555e-25	0.427681	0.173	0.063	1.17037e-20	2.74603
Rexo5	1.45274e-50	0.607293	0.264	0.097	2.57397e-46	2.72165
Cyp39a1	4.08015e-36	0.562261	0.255	0.094	7.22922e-32	2.71276
Eri2	8.97055e-32	0.475944	0.205	0.076	1.5894e-27	2.69736
Cenpn	1.98006e-33	0.468519	0.191	0.071	3.50827e-29	2.69014
Cenpi	1.7087e-47	0.623845	0.298	0.111	3.02747e-43	2.68468
Melk	8.85534e-46	0.625726	0.295	0.111	1.56899e-41	2.65766
Ccdc77	1.82328e-33	0.429694	0.205	0.079	3.23048e-29	2.59493
Ddx11	1.29567e-41	0.583843	0.276	0.107	2.29568e-37	2.57944
Uevld	3.834e-19	0.353192	0.149	0.058	6.79309e-15	2.56896
Fbxo5	6.34587e-21	0.439994	0.189	0.074	1.12436e-16	2.55405
Kif15	1.13376e-183	1.22958	0.768	0.301	2.0088e-179	2.55149
Eldr	1.65833e-18	0.301732	0.122	0.048	2.93822e-14	2.54166
Nsl1	1.24411e-18	0.284388	0.127	0.05	2.20431e-14	2.53999
Top2a	0	1.66158	0.931	0.367	0	2.53678
Rangap1	1.98354e-84	0.82463	0.449	0.177	3.51444e-80	2.53672
Mns1	2.26257e-35	0.478667	0.237	0.094	4.00882e-31	2.52127
Proser3	1.20466e-20	0.278185	0.126	0.05	2.13442e-16	2.51999
Ncaph	6.40721e-41	0.596606	0.304	0.122	1.13523e-36	2.4918
Traip	5.31232e-18	0.292992	0.132	0.053	9.41237e-14	2.49056
Nup37	1.2508e-16	0.274396	0.112	0.045	2.21618e-12	2.48888
Nemp1	1.88778e-29	0.400623	0.179	0.072	3.34477e-25	2.48611
Hmgb2	1.40509e-56	0.677645	0.353	0.142	2.48953e-52	2.48591
Bub3	1.23151e-44	0.514069	0.263	0.106	2.18198e-40	2.48113
Crnde	5.92206e-16	0.359733	0.151	0.061	1.04927e-11	2.47541
Eme1	1.53169e-18	0.27483	0.111	0.045	2.71386e-14	2.46666
Terf1	1.49235e-74	0.817645	0.453	0.184	2.64415e-70	2.46196
Ska2	3.74574e-58	0.723685	0.384	0.156	6.6367e-54	2.46154
Ccdc61	2.1479e-29	0.373204	0.179	0.073	3.80565e-25	2.45205
Fut10	1.10251e-28	0.47627	0.22	0.09	1.95342e-24	2.44444
Adam19	2.28839e-21	0.4136	0.188	0.077	4.05457e-17	2.44156
Gm12610	1.84256e-19	0.373133	0.156	0.064	3.26464e-15	2.4375
Stil	1.71079e-53	0.619286	0.316	0.131	3.03118e-49	2.41221
Mybl1	1.51978e-26	0.42393	0.207	0.086	2.69274e-22	2.40697
E2f8	6.15399e-27	0.421873	0.199	0.083	1.09036e-22	2.39759
G2e3	3.442e-191	1.31227	0.763	0.319	6.09854e-187	2.39185
Klf6	2.78815e-25	0.343965	0.166	0.07	4.94004e-21	2.37143
Ube2s	1.14449e-20	0.369582	0.177	0.075	2.0278e-16	2.36
Wee1	8.17419e-41	0.530795	0.292	0.124	1.4483e-36	2.35484
Plk4	2.66e-38	0.55982	0.309	0.132	4.71298e-34	2.34091
Spc24	3.45727e-12	0.250396	0.105	0.045	6.12558e-08	2.33333
Cntrl	2.09225e-132	1.12681	0.651	0.281	3.70705e-128	2.31673
Lmnb2	8.3425e-21	0.364659	0.184	0.08	1.47812e-16	2.3
Neil3	2.92158e-67	0.745697	0.461	0.203	5.17645e-63	2.27093
Fancd2	2.07626e-33	0.469063	0.245	0.108	3.67872e-29	2.26852
Ldlr	8.71342e-21	0.405139	0.188	0.083	1.54384e-16	2.26506
Esco2	1.14159e-31	0.519174	0.269	0.119	2.02268e-27	2.2605
Ccng2	2.52632e-27	0.41617	0.221	0.098	4.47614e-23	2.2551
Cep70	1.53966e-28	0.475831	0.257	0.114	2.72796e-24	2.25438
Papd7	7.86404e-49	0.576537	0.335	0.149	1.39335e-44	2.24832
Cntrob	2.7294e-17	0.38949	0.184	0.082	4.83595e-13	2.2439
Syt13	1.53873e-56	0.657325	0.371	0.167	2.72633e-52	2.22156
Sun2	5.52202e-30	0.456301	0.244	0.11	9.78391e-26	2.21818
Katnal2	7.10082e-20	0.378727	0.208	0.094	1.25812e-15	2.21276
Jade1	3.17271e-16	0.305386	0.163	0.074	5.6214e-12	2.2027
Tbc1d31	2.87382e-39	0.517365	0.292	0.133	5.09183e-35	2.19549
Cep85	5.11845e-28	0.428589	0.237	0.108	9.06887e-24	2.19444
Ncapd2	1.06273e-114	0.992834	0.645	0.294	1.88295e-110	2.19388
Diaph3	6.80887e-185	1.11692	0.855	0.394	1.2064e-180	2.17005
Mettl15	9.54557e-65	0.716543	0.436	0.201	1.69128e-60	2.16915
Smc4	4.66427e-217	1.30216	0.852	0.393	8.26415e-213	2.16794
Ticrr	2.66666e-32	0.505111	0.279	0.129	4.7248e-28	2.16279
Ckap5	9.567e-262	1.40832	0.868	0.403	1.69508e-257	2.15385
Atl2	1.6852e-50	0.566848	0.355	0.166	2.98583e-46	2.13855
Polq	9.51839e-53	0.682834	0.449	0.211	1.68647e-48	2.12796
Cenpq	3.81429e-13	0.260019	0.129	0.061	6.75816e-09	2.11475
Cenpp	1.20619e-114	0.959475	0.709	0.336	2.13713e-110	2.11012
Wdr62	7.17856e-18	0.316856	0.173	0.082	1.2719e-13	2.10975
Odf2	1.46283e-63	0.735185	0.49	0.233	2.59185e-59	2.103
Pde1a	3.36014e-18	0.441351	0.197	0.094	5.95349e-14	2.09574
Gria1	1.24011e-16	0.321445	0.124	0.06	2.19723e-12	2.06666
Rad21	1.26218e-131	0.986805	0.712	0.345	2.23632e-127	2.06377
Mki67	0	1.72041	0.983	0.482	0	2.03942
Cenpc1	6.46602e-82	0.878606	0.587	0.288	1.14565e-77	2.03819
Pcdh15	1.41413e-16	0.34184	0.165	0.081	2.50555e-12	2.03703
Zwilch	9.53324e-17	0.374686	0.213	0.105	1.6891e-12	2.02857
Alk	1.05397e-14	0.271318	0.133	0.066	1.86742e-10	2.01515
Ttf2	6.42072e-13	0.322543	0.175	0.088	1.13762e-08	1.98863
Pkp4	1.33191e-163	1.08569	0.799	0.403	2.35987e-159	1.98263
Arhgap33	8.00724e-39	0.519591	0.336	0.171	1.41872e-34	1.96491
Hmgn2	1.08004e-23	0.311508	0.194	0.099	1.91361e-19	1.95959
Fat3	6.96578e-91	0.896286	0.721	0.368	1.2342e-86	1.95924
Mdm1	5.65347e-20	0.383119	0.239	0.122	1.00168e-15	1.95901
Ccdc34	9.67797e-29	0.540629	0.38	0.194	1.71474e-24	1.95876
Kif24	6.58754e-32	0.507388	0.348	0.178	1.16718e-27	1.95506
Hist1h1b	2.94167e-21	0.420503	0.248	0.127	5.21205e-17	1.95275
Polh	1.23036e-10	0.326897	0.185	0.095	2.17995e-06	1.94737
Cdh13	6.11734e-104	1.18801	0.698	0.36	1.08387e-99	1.93889
Poc5	3.35196e-16	0.269542	0.164	0.085	5.939e-12	1.92941
Mtmr12	8.01309e-27	0.406008	0.272	0.141	1.41976e-22	1.92908
Plch1	1.17429e-28	0.486153	0.331	0.172	2.0806e-24	1.92442
Fanci	1.46096e-13	0.280987	0.173	0.09	2.58854e-09	1.92222
Prkcq	8.78469e-16	0.349568	0.244	0.127	1.55647e-11	1.92126
Mtmr14	2.15107e-18	0.288381	0.194	0.101	3.81127e-14	1.92079
Ift80	3.69319e-36	0.559144	0.411	0.215	6.5436e-32	1.91163
Jpt1	8.6199e-39	0.427562	0.32	0.168	1.52727e-34	1.90476
Uaca	7.91761e-10	0.253563	0.158	0.083	1.40284e-05	1.90361
Sptb	1.31822e-10	0.26791	0.169	0.089	2.33562e-06	1.89887
Smc2	6.35516e-145	0.992911	0.81	0.427	1.12601e-140	1.89696
Lrfn2	5.71818e-12	0.32856	0.201	0.106	1.01315e-07	1.89622
Lmnb1	1.99318e-89	0.883989	0.691	0.365	3.53151e-85	1.89315
Rad54b	1.42388e-23	0.428181	0.301	0.159	2.52283e-19	1.89308
Stk17b	2.23827e-15	0.295911	0.189	0.1	3.96577e-11	1.89
Hirip3	2.07563e-12	0.337779	0.239	0.127	3.6776e-08	1.88189
Tuba1b	2.10282e-11	0.26522	0.15	0.08	3.72578e-07	1.875
Zc3h7a	3.72631e-80	0.753183	0.569	0.304	6.60228e-76	1.87171
Anp32e	1.83509e-42	0.574157	0.423	0.226	3.25141e-38	1.87168
Mdc1	6.84027e-29	0.458173	0.333	0.179	1.21196e-24	1.86033
Cenpk	1.25248e-21	0.32808	0.223	0.12	2.21914e-17	1.85833
Hist1h1e	7.24983e-20	0.429564	0.258	0.139	1.28453e-15	1.85611
Tspan18	5.61706e-33	0.46731	0.367	0.198	9.95231e-29	1.85353
Ngfr	2.47397e-10	0.257184	0.176	0.095	4.38337e-06	1.85263
Nucks1	2.46529e-80	0.779426	0.629	0.341	4.368e-76	1.84457
Hdgf	1.27708e-21	0.4045	0.307	0.168	2.26273e-17	1.82738
E2f5	5.00475e-14	0.283736	0.197	0.108	8.86742e-10	1.82407
Cep128	8.00279e-74	0.732806	0.658	0.361	1.41793e-69	1.82271
Cep192	1.64793e-54	0.619318	0.524	0.288	2.9198e-50	1.81944
Ldlrad3	3.46778e-21	0.329716	0.229	0.126	6.14422e-17	1.81746
Gm5577	9.88805e-20	0.313919	0.216	0.119	1.75197e-15	1.81512
Lbr	1.24634e-34	0.495238	0.412	0.227	2.20827e-30	1.81498
Alg13	1.82766e-15	0.359898	0.277	0.153	3.23825e-11	1.81046
Asxl1	2.9235e-100	0.901522	0.706	0.39	5.17987e-96	1.81026
Ncaph2	4.31796e-29	0.352228	0.257	0.142	7.65057e-25	1.80986
Lurap1l	5.65483e-18	0.274401	0.177	0.098	1.00192e-13	1.80612
H2afv	7.69123e-31	0.389496	0.298	0.165	1.36273e-26	1.80606
Pdzrn4	1.26251e-74	0.709298	0.646	0.358	2.23691e-70	1.80447
Hjurp	4.66191e-188	1.12437	0.86	0.477	8.25998e-184	1.80293
Brd8	2.42721e-103	0.854593	0.712	0.395	4.30052e-99	1.80253
Rbm15	4.96271e-17	0.294292	0.218	0.121	8.79293e-13	1.80165
Cklf	1.63597e-16	0.39879	0.317	0.176	2.89862e-12	1.80114
Tmpo	9.19922e-97	0.809554	0.731	0.406	1.62992e-92	1.80049
Rad51ap1	2.41916e-14	0.292247	0.201	0.112	4.28627e-10	1.79464
Cenpj	3.64481e-22	0.407891	0.317	0.177	6.45788e-18	1.79096
Pou6f2	2.34465e-14	0.326305	0.184	0.103	4.15425e-10	1.78641
Cep295	1.51412e-53	0.637981	0.546	0.306	2.68271e-49	1.78431
Lin9	4.22364e-21	0.337286	0.27	0.152	7.48344e-17	1.77631
Cep57l1	5.70355e-19	0.317584	0.228	0.129	1.01056e-14	1.76744
Kmt5a	9.00862e-15	0.313087	0.242	0.138	1.59615e-10	1.75362
Hpca	5.02261e-26	0.451822	0.364	0.208	8.89906e-22	1.75
Cep135	6.58424e-26	0.42434	0.356	0.204	1.1666e-21	1.7451
Ndc1	4.32395e-18	0.296861	0.24	0.138	7.66117e-14	1.73913
Tdp1	2.10424e-23	0.399876	0.316	0.182	3.72829e-19	1.73626
Rbl1	2.36198e-23	0.362314	0.308	0.178	4.18496e-19	1.73034
Phldb1	1.82466e-24	0.370005	0.299	0.173	3.23293e-20	1.72832
Pxdn	1.00098e-13	0.277952	0.228	0.132	1.77353e-09	1.72727
Slco3a1	4.06491e-09	0.349017	0.24	0.139	7.2022e-05	1.72662
Sephs1	1.52788e-11	0.315508	0.274	0.159	2.70709e-07	1.72327
Insm1	2.11856e-14	0.282392	0.217	0.126	3.75367e-10	1.72222
Hunk	8.48019e-25	0.434147	0.332	0.193	1.50252e-20	1.72021
Mamdc2	3.66422e-22	0.408339	0.317	0.185	6.49226e-18	1.71351
Kntc1	2.14282e-22	0.345646	0.333	0.195	3.79666e-18	1.70769
Akirin2	1.5167e-09	0.267719	0.221	0.13	2.68729e-05	1.7
E2f7	1.11258e-20	0.375954	0.316	0.186	1.97127e-16	1.69892
Notch2	1.73963e-17	0.370228	0.323	0.191	3.08228e-13	1.6911
Smco4	3.57044e-18	0.295173	0.273	0.162	6.32611e-14	1.68518
Cdk5rap2	1.2367e-116	0.836641	0.788	0.468	2.19119e-112	1.68376
Sugp2	6.17301e-20	0.289429	0.264	0.157	1.09373e-15	1.68153
Igsf3	2.55517e-17	0.311153	0.277	0.165	4.52724e-13	1.67879
Epb41l2	2.24473e-40	0.539242	0.507	0.303	3.97721e-36	1.67327
Cdc27	5.72234e-44	0.511998	0.512	0.306	1.01388e-39	1.6732
Sorcs2	1.5404e-33	0.505526	0.476	0.285	2.72928e-29	1.67017
Wdpcp	3.06559e-32	0.531424	0.515	0.31	5.43161e-28	1.66129
Cep112	4.7912e-23	0.400848	0.378	0.228	8.48905e-19	1.65789
Lin54	2.80979e-11	0.26234	0.216	0.131	4.97839e-07	1.64885
Hsp90b1	4.15623e-47	0.564927	0.554	0.336	7.36401e-43	1.64881
Gm11541	4.4447e-19	0.256655	0.25	0.153	7.87512e-15	1.63399
Mad1l1	7.23829e-31	0.464412	0.471	0.289	1.28248e-26	1.62976
Serinc5	4.32003e-34	0.462746	0.477	0.293	7.65423e-30	1.62799
Ptn	1.49206e-32	0.484212	0.472	0.29	2.64363e-28	1.62759
Traf3	1.91954e-16	0.351701	0.359	0.221	3.40104e-12	1.62443
Qsox1	3.76457e-10	0.250992	0.246	0.152	6.67006e-06	1.61842
Lama5	4.27125e-17	0.297153	0.346	0.214	7.56781e-13	1.61682
Odf2l	2.41801e-17	0.274253	0.264	0.164	4.28423e-13	1.60976
Rgs12	2.41631e-18	0.315066	0.337	0.21	4.28122e-14	1.60476
Il1rapl1	3.89811e-65	0.693699	0.702	0.439	6.90668e-61	1.59909
Dpysl4	7.24756e-24	0.392944	0.409	0.256	1.28412e-19	1.59766
Sae1	8.7634e-22	0.368705	0.423	0.266	1.5527e-17	1.59022
Ulk4	7.94977e-17	0.423494	0.341	0.215	1.40854e-12	1.58605
Adamts6	1.70526e-87	0.730844	0.774	0.489	3.02138e-83	1.58282
Nxph1	3.4735e-13	0.35232	0.246	0.156	6.15435e-09	1.57692
Ncapg2	3.76423e-17	0.277589	0.327	0.209	6.66946e-13	1.56459
Srbd1	2.36077e-21	0.388821	0.456	0.292	4.18282e-17	1.56164
Nin	1.85449e-43	0.541844	0.643	0.412	3.28579e-39	1.56068
Ptpa	1.14443e-11	0.268206	0.285	0.183	2.02769e-07	1.55738
Lnpk	7.17034e-29	0.354543	0.417	0.268	1.27044e-24	1.55597
Mcph1	4.95301e-33	0.445698	0.591	0.38	8.77574e-29	1.55526
Calm2	1.54937e-37	0.50255	0.591	0.381	2.74518e-33	1.55118
Stxbp6	2.62864e-27	0.415876	0.568	0.367	4.65742e-23	1.54768
Pcnt	2.62318e-23	0.410139	0.497	0.322	4.64775e-19	1.54348
Sh3bgrl	7.41814e-16	0.312537	0.354	0.23	1.31435e-11	1.53913
Cep152	2.37699e-09	0.282181	0.312	0.203	4.21155e-05	1.53695
Pcf11	1.53169e-24	0.35809	0.433	0.282	2.71385e-20	1.53546
Tpk1	1.31068e-12	0.290514	0.284	0.185	2.32226e-08	1.53513
Mical3	9.23072e-19	0.312411	0.411	0.269	1.6355e-14	1.52788
Homer2	6.14128e-15	0.287828	0.385	0.252	1.08811e-10	1.52778
Bcl2	5.60096e-11	0.270199	0.278	0.182	9.92377e-07	1.52747
Rad18	4.44077e-14	0.267088	0.325	0.213	7.86815e-10	1.52582
Zdbf2	7.28475e-18	0.321758	0.369	0.242	1.29071e-13	1.52479
Igf2bp3	1.10747e-10	0.261621	0.247	0.162	1.96221e-06	1.52469
Blm	2.09879e-14	0.284734	0.375	0.246	3.71864e-10	1.52439
Cse1l	1.35048e-09	0.265137	0.294	0.193	2.39278e-05	1.52332
Mphosph9	2.79847e-40	0.53274	0.669	0.441	4.95833e-36	1.51701
Hp1bp3	8.40816e-25	0.411317	0.526	0.347	1.48976e-20	1.51585
Zcchc8	3.55778e-18	0.257704	0.347	0.229	6.30367e-14	1.51528
Fxyd6	1.6596e-14	0.26024	0.295	0.196	2.94047e-10	1.5051
Airn	2.94933e-17	0.427787	0.497	0.331	5.22563e-13	1.50151
C2cd5	4.84783e-34	0.426793	0.575	0.383	8.58939e-30	1.50131
Sesn1	1.61716e-12	0.286601	0.313	0.21	2.86528e-08	1.49048
Gstcd	7.19803e-10	0.266817	0.323	0.217	1.27535e-05	1.48848
Uhrf2	3.88418e-53	0.583966	0.715	0.481	6.88199e-49	1.48649
Ppp2r5c	2.11544e-21	0.383935	0.543	0.367	3.74814e-17	1.47956
Ahctf1	1.6956e-20	0.308406	0.469	0.318	3.00427e-16	1.47484
Ddr2	8.74185e-13	0.296646	0.437	0.298	1.54888e-08	1.46644
Ddhd1	3.40743e-23	0.283999	0.444	0.303	6.03728e-19	1.46535
Cbl	1.00233e-08	0.251197	0.331	0.226	0.000177592	1.4646
Kansl1l	7.65729e-25	0.335449	0.505	0.345	1.35672e-20	1.46377
Magi3	2.81105e-29	0.440276	0.662	0.453	4.98062e-25	1.46137
Tpcn1	4.5253e-23	0.412903	0.575	0.395	8.01792e-19	1.4557
Qser1	6.04541e-25	0.380629	0.533	0.367	1.07113e-20	1.45232
Cep83	6.93973e-20	0.36025	0.524	0.361	1.22958e-15	1.45152
Ilf3	1.59875e-20	0.344323	0.544	0.375	2.83267e-16	1.45067
Ncapd3	6.13605e-21	0.330113	0.475	0.328	1.08719e-16	1.44817
Hmgb1	7.38766e-12	0.257944	0.408	0.282	1.30895e-07	1.44681
Fnip1	6.61524e-14	0.252653	0.399	0.276	1.17209e-09	1.44565
Suz12	9.4629e-16	0.28611	0.461	0.319	1.67664e-11	1.44514
Slc7a1	2.37133e-09	0.263806	0.335	0.232	4.20152e-05	1.44396
Cntln	9.86736e-22	0.345689	0.501	0.347	1.7483e-17	1.4438
Fancc	1.98731e-16	0.273785	0.477	0.331	3.52112e-12	1.44109
Ctcf	9.62668e-13	0.305396	0.477	0.331	1.70565e-08	1.44109
Cdh4	5.1863e-48	0.473633	0.786	0.547	9.18908e-44	1.43693
Lcorl	7.12886e-39	0.465576	0.659	0.459	1.26309e-34	1.43573
Numa1	2.23441e-31	0.380922	0.59	0.411	3.95894e-27	1.43552
Dleu2	1.27796e-32	0.416917	0.656	0.457	2.2643e-28	1.43545
Sgce	1.35389e-21	0.307094	0.454	0.317	2.39882e-17	1.43218
Pitpnm2	5.67063e-18	0.252847	0.421	0.294	1.00472e-13	1.43197
Rbmx	2.99304e-17	0.286741	0.468	0.327	5.30307e-13	1.43119
Ncald	4.86906e-47	0.612484	0.714	0.499	8.627e-43	1.43086
Ccnd1	2.66546e-18	0.308263	0.515	0.36	4.72266e-14	1.43056
N4bp2	2.02738e-13	0.278901	0.447	0.313	3.59211e-09	1.42811
Nup98	3.3964e-27	0.322439	0.492	0.345	6.01775e-23	1.42609
Ttll5	6.34195e-23	0.349143	0.553	0.388	1.12367e-18	1.42526
Fgd6	3.72023e-26	0.363456	0.541	0.38	6.5915e-22	1.42368
Cntnap2	5.05033e-67	0.743768	0.843	0.594	8.94817e-63	1.41919
Gli2	1.31194e-46	0.455355	0.844	0.595	2.3245e-42	1.41849
Plxnc1	1.03919e-16	0.335149	0.546	0.385	1.84125e-12	1.41818
Mdm4	2.20602e-19	0.336772	0.536	0.378	3.90862e-15	1.41799
Ipo11	2.60831e-14	0.301141	0.493	0.348	4.6214e-10	1.41667
Ppm1b	4.97179e-09	0.282221	0.42	0.298	8.80901e-05	1.4094
Gpc6	9.78528e-27	0.31031	0.789	0.563	1.73376e-22	1.40142
Ralgps2	1.78667e-36	0.424105	0.695	0.496	3.16562e-32	1.40121
Smc1a	1.29395e-15	0.286215	0.546	0.39	2.29263e-11	1.4
Thada	3.68826e-14	0.287351	0.529	0.379	6.53486e-10	1.39578
Xpo1	1.3724e-32	0.39338	0.689	0.495	2.43162e-28	1.39192
Rai14	1.56163e-12	0.275804	0.442	0.318	2.7669e-08	1.38994
Trerf1	3.34886e-15	0.294855	0.521	0.376	5.93351e-11	1.38564
Nasp	4.39223e-28	0.30572	0.647	0.467	7.78216e-24	1.38544
Ankrd44	2.46556e-18	0.281801	0.566	0.409	4.36848e-14	1.38386
Cdk19	7.59016e-26	0.382867	0.651	0.471	1.34482e-21	1.38217
Myef2	2.49253e-32	0.408883	0.675	0.489	4.41626e-28	1.38037
Zfp91	1.50442e-13	0.285285	0.554	0.402	2.66553e-09	1.37811
Hnrnpul1	3.08864e-14	0.281319	0.527	0.383	5.47245e-10	1.37598
Osbp2	4.58179e-21	0.33027	0.571	0.416	8.11802e-17	1.3726
Lrch1	4.54671e-12	0.253664	0.423	0.309	8.05586e-08	1.36893
Slc12a6	5.27494e-13	0.252607	0.468	0.342	9.34614e-09	1.36842
Alcam	4.25464e-22	0.289924	0.659	0.482	7.53837e-18	1.36722
Wapl	2.22761e-13	0.269531	0.459	0.336	3.94688e-09	1.36607
Dyrk1a	1.04291e-35	0.46877	0.75	0.55	1.84783e-31	1.36364
Slc25a27	3.36997e-14	0.270431	0.496	0.364	5.97092e-10	1.36264
Plxnb2	2.15307e-16	0.284441	0.532	0.392	3.81482e-12	1.35714
Pou2f1	2.32891e-27	0.362667	0.689	0.508	4.12636e-23	1.3563
Ezh2	1.65887e-31	0.36689	0.722	0.534	2.93919e-27	1.35206
Ebf2	3.442e-16	0.277693	0.465	0.344	6.09854e-12	1.35174
Cspp1	1.12427e-23	0.310884	0.653	0.485	1.99199e-19	1.34639
Asap1	1.7429e-27	0.366896	0.775	0.576	3.08807e-23	1.34549
Sdk1	7.46901e-97	0.725426	0.902	0.673	1.32336e-92	1.34027
Wnk1	6.74419e-37	0.445294	0.762	0.569	1.19493e-32	1.33919
Srrt	2.17036e-13	0.252728	0.506	0.378	3.84544e-09	1.33862
Tmem131l	7.2541e-16	0.257084	0.61	0.465	1.28528e-11	1.31183
Prrc2a	1.36187e-18	0.298119	0.63	0.481	2.41296e-14	1.30977
Pde3a	1.4608e-20	0.325009	0.729	0.558	2.58825e-16	1.30645
Zfp608	1.70332e-39	0.376677	0.787	0.603	3.01795e-35	1.30514
Zfp704	5.10687e-75	0.60919	0.894	0.687	9.04835e-71	1.30131
Soga1	3.90432e-17	0.304537	0.68	0.523	6.91767e-13	1.30019
Qk	6.87585e-16	0.260986	0.75	0.578	1.21826e-11	1.29758
Pds5b	1.09561e-20	0.314644	0.774	0.598	1.9412e-16	1.29431
Neo1	7.09715e-35	0.433539	0.823	0.636	1.25747e-30	1.29402
Frmd4b	3.87141e-87	0.611021	0.938	0.726	6.85937e-83	1.29201
Nsd2	1.53091e-35	0.345702	0.82	0.635	2.71247e-31	1.29134
Ccnd2	1.8924e-10	0.303763	0.621	0.482	3.35295e-06	1.28838
Ppp6r3	2.88293e-21	0.297893	0.715	0.559	5.10797e-17	1.27907
Exoc2	1.12971e-17	0.272184	0.609	0.477	2.00162e-13	1.27673
Dclk1	1.42355e-19	0.302424	0.777	0.612	2.52225e-15	1.26961
Tox3	1.69532e-38	0.373261	0.854	0.673	3.00377e-34	1.26894
Cdc42bpa	2.60691e-26	0.303554	0.763	0.605	4.61893e-22	1.26116
Pard3	5.70558e-25	0.353551	0.837	0.669	1.01092e-20	1.25112
Ttc28	2.03871e-21	0.310337	0.793	0.635	3.61218e-17	1.24882
Tmeff2	1.23367e-21	0.309799	0.826	0.666	2.18582e-17	1.24024
Syne2	4.11686e-19	0.279228	0.848	0.686	7.29425e-15	1.23615
Tead1	6.97135e-23	0.324975	0.856	0.693	1.23518e-18	1.23521
Zfp536	4.30043e-35	0.425595	0.871	0.706	7.6195e-31	1.23371
Macrod2	4.49049e-26	0.348777	0.86	0.699	7.95625e-22	1.23033
Foxn3	6.64027e-20	0.302755	0.808	0.657	1.17652e-15	1.22983
Hnrnpa2b1	4.49103e-32	0.36308	0.88	0.72	7.9572e-28	1.22222
Magi1	7.83007e-22	0.268392	0.799	0.657	1.38733e-17	1.21613
Stag1	5.53921e-33	0.294276	0.904	0.761	9.81438e-29	1.18791
Tshz2	3.98795e-23	0.29565	0.902	0.763	7.06586e-19	1.18218
Celf4	0.879759	-0.347598	0.719	0.61	1	1.17869
Phip	7.13573e-19	0.314754	0.904	0.767	1.26431e-14	1.17862
Rnf220	3.02737e-20	0.276166	0.829	0.704	5.36389e-16	1.17756
Cadm1	5.55412e-47	0.384615	0.963	0.821	9.8408e-43	1.17296
Nedd4l	1.23126e-35	0.362083	0.928	0.798	2.18154e-31	1.16291
Kcnq5	0.300328	-0.436657	0.598	0.516	1	1.15891
Myo16	1.23268e-37	0.327957	0.946	0.838	2.18407e-33	1.12888
Pbx3	4.24524e-55	0.383484	0.96	0.852	7.52171e-51	1.12676
Lrrc7	2.07139e-54	0.416662	0.974	0.875	3.67009e-50	1.11314
Map4k4	5.73205e-40	0.326335	0.955	0.862	1.01561e-35	1.10789
Klhl29	0.00353762	-0.394083	0.685	0.621	1	1.10306
Ncam1	2.21519e-33	0.311936	0.972	0.883	3.92488e-29	1.10079
Cadm2	0.0220844	-0.7908	0.575	0.527	1	1.09108
Ptprg	0.00898143	-0.267475	0.9	0.828	1	1.08696
Fam155a	1.26111e-39	0.396815	0.978	0.902	2.23444e-35	1.08426
Kcnb2	4.32125e-08	-0.338049	0.863	0.8	0.000765639	1.07875
Pola1	0.0822861	-0.256824	0.559	0.52	1	1.075
Trpm3	0.964392	-0.275097	0.221	0.206	1	1.07282
Robo2	0.00146044	-0.289228	0.856	0.804	1	1.06468
Zfp423	0.00919578	-0.303643	0.567	0.541	1	1.04806
Astn2	9.42896e-09	-0.27129	0.936	0.894	0.000167062	1.04698
Anks1b	1.33015e-14	-0.413885	0.77	0.736	2.35676e-10	1.0462
Egfr	3.79397e-05	-0.321103	0.519	0.497	0.672215	1.04427
Pard3b	0.000680931	-0.295501	0.572	0.548	1	1.0438
Peli2	0.000148854	-0.260888	0.702	0.673	1	1.04309
Ank2	3.03606e-07	-0.319111	0.941	0.904	0.00537929	1.04093
Fmnl2	1.36437e-06	-0.271333	0.764	0.734	0.0241738	1.04087
Pcdh9	0.0161926	-0.493666	0.485	0.466	1	1.04077
Cmss1	7.1189e-14	0.311629	0.987	0.949	1.26133e-09	1.04004
Lsamp	1.49654e-16	-0.382752	0.969	0.934	2.65157e-12	1.03747
Zfp385b	0.00151985	-0.363598	0.539	0.52	1	1.03654
Cadps	1.89375e-12	-0.295278	0.855	0.825	3.35535e-08	1.03636
Elavl3	0.00182851	-0.261839	0.629	0.608	1	1.03454
Zfp521	2.19356e-08	-0.434836	0.707	0.684	0.000388655	1.03363
Pde4d	2.4953e-18	-0.567064	0.919	0.891	4.42118e-14	1.03143
Rora	1.39314e-09	-0.273626	0.949	0.921	2.46836e-05	1.0304
Apc	1.27759e-07	-0.335626	0.807	0.784	0.00226364	1.02934
Dscaml1	0.000256962	-0.317236	0.577	0.561	1	1.02852
Maml3	9.84925e-13	-0.308685	0.921	0.896	1.74509e-08	1.0279
B3galt1	2.12339e-09	-0.309996	0.842	0.82	3.76223e-05	1.02683
Rtn1	0.000835461	-0.260516	0.541	0.528	1	1.02462
Macf1	6.714e-11	-0.261476	0.751	0.735	1.18959e-06	1.02177
Dcx	0.000411095	-0.319726	0.565	0.553	1	1.0217
Kmt2e	2.22641e-06	-0.264447	0.715	0.7	0.0394475	1.02143
Celf2	5.70118e-08	-0.25276	0.994	0.975	0.00101013	1.01949
Nrxn1	6.2701e-31	-0.429717	0.946	0.928	1.11094e-26	1.0194
Psd3	6.22068e-05	-0.313705	0.632	0.621	1	1.01771
Ptprs	4.05125e-21	-0.403026	0.814	0.8	7.17801e-17	1.0175
Erbb4	3.02444e-47	-0.718506	0.939	0.923	5.35871e-43	1.01733
Pak7	1.32182e-08	-0.421742	0.655	0.644	0.0002342	1.01708
Plcb1	9.70433e-14	-0.543927	0.737	0.725	1.71941e-09	1.01655
Grik2	1.77088e-36	-0.44541	0.975	0.96	3.13764e-32	1.01562
Frmd5	3.95883e-07	-0.306675	0.52	0.512	0.00701425	1.01562
Syn2	0.535837	-0.255939	0.381	0.376	1	1.0133
Mapk10	7.90553e-08	-0.365215	0.634	0.626	0.0014007	1.01278
Cask	5.43034e-12	-0.334826	0.633	0.626	9.62148e-08	1.01118
Phf20l1	0.0312212	-0.280689	0.57	0.564	1	1.01064
Gm4258	3.24007e-07	-0.335651	0.599	0.593	0.00574075	1.01012
Zmiz1	4.58244e-30	-0.484502	0.86	0.852	8.11916e-26	1.00939
Nrcam	1.82918e-05	-0.370976	0.586	0.581	0.324095	1.00861
Gria4	3.2411e-39	-0.635827	0.868	0.861	5.74258e-35	1.00813
Gm20696	0.118185	-0.297226	0.443	0.44	1	1.00682
Cacna2d1	1.53267e-20	-0.277705	0.997	0.991	2.71559e-16	1.00605
Mdga2	0.774522	-0.258338	0.326	0.325	1	1.00308
Plxna2	0.419492	-0.422832	0.29	0.29	1	1
Sema6a	1.33721e-12	-0.597969	0.662	0.665	2.36927e-08	0.995489
Exoc6b	0.000341371	-0.302878	0.575	0.578	1	0.99481
Rbfox3	6.07237e-64	-0.776825	0.902	0.907	1.0759e-59	0.994487
Gabrb3	0.00256158	-0.269409	0.513	0.516	1	0.994186
Kif1b	3.10797e-22	-0.392229	0.768	0.774	5.5067e-18	0.992248
Plppr1	3.10083e-09	-0.529358	0.614	0.619	5.49406e-05	0.991922
Ptprk	9.71669e-05	-0.299521	0.527	0.532	1	0.990601
Gramd1b	5.00571e-28	-0.524917	0.767	0.776	8.86913e-24	0.988402
Tnik	1.04778e-33	-0.682974	0.739	0.748	1.85645e-29	0.987968
Apba1	0.000699733	-0.365037	0.403	0.408	1	0.987745
Gab1	0.00142421	-0.286719	0.397	0.402	1	0.987562
Dync2h1	0.00341915	-0.28528	0.476	0.482	1	0.987552
Gpm6a	3.37994e-12	-0.538258	0.59	0.598	5.98859e-08	0.986622
Rev3l	1.66671e-06	-0.250629	0.512	0.519	0.0295308	0.986512
Nkain3	3.54233e-07	-0.400999	0.569	0.577	0.0062763	0.986135
Park2	0.000264947	-0.278582	0.349	0.354	1	0.985875
Sema6d	3.67856e-05	-0.316335	0.422	0.433	0.651767	0.974596
Sox5	5.22003e-18	-0.481543	0.688	0.706	9.24885e-14	0.974504
Cnksr2	7.45407e-09	-0.415185	0.571	0.589	0.000132071	0.96944
Prim2	0.00534251	-0.253251	0.31	0.32	1	0.96875
Cacna1b	0.00927007	-0.309501	0.431	0.445	1	0.968539
Adam22	9.4789e-05	-0.3064	0.486	0.502	1	0.968127
Igfbpl1	0.03434	-0.266221	0.32	0.331	1	0.966767
Hs6st3	0.000127541	-0.572343	0.461	0.477	1	0.966457
Stau2	0.120029	-0.255304	0.425	0.442	1	0.961538
Xkr6	9.95348e-07	-0.389862	0.421	0.438	0.0176356	0.961187
Adgrl3	1.22371e-12	-0.434359	0.63	0.661	2.16817e-08	0.953101
Tenm2	0.000549714	-0.267759	0.221	0.232	1	0.952586
Zmynd8	4.5367e-07	-0.332289	0.434	0.456	0.00803812	0.951754
Kdm4c	0.0196011	-0.251663	0.362	0.381	1	0.950131
Galnt13	0.00531952	-0.362823	0.351	0.37	1	0.948648
Sorbs1	1.45272e-18	-0.548822	0.57	0.601	2.57393e-14	0.948419
Bin1	2.51646e-05	-0.318001	0.364	0.384	0.445867	0.947916
Pcdh7	0.00177801	-0.297043	0.342	0.361	1	0.947368
Igsf21	0.0101084	-0.345618	0.353	0.374	1	0.94385
Gm9801	0.045651	-0.273698	0.302	0.322	1	0.937888
Ppm1l	2.83803e-08	-0.336855	0.436	0.465	0.000502841	0.937634
Celsr2	1.51093e-05	-0.278907	0.39	0.416	0.267706	0.9375
Snhg14	7.09126e-06	-0.487013	0.36	0.384	0.125643	0.9375
Ppfia2	6.1932e-25	-0.650632	0.614	0.656	1.09731e-20	0.935975
Neurod1	1.12509e-06	-0.473786	0.306	0.327	0.0199343	0.93578
Mxi1	0.0119428	-0.291699	0.332	0.355	1	0.935211
Kdm6b	0.00387467	-0.255643	0.301	0.322	1	0.934782
Ube2h	8.29935e-06	-0.287639	0.324	0.347	0.147048	0.933717
Col4a2	0.115982	-0.278739	0.161	0.173	1	0.930635
Whrn	0.0112822	-0.332921	0.295	0.317	1	0.930599
Dmxl2	2.65297e-05	-0.312687	0.371	0.399	0.470054	0.929824
Stmn2	0.012166	-0.299159	0.29	0.312	1	0.929487
Zfpm2	1.70304e-52	-1.16646	0.659	0.71	3.01744e-48	0.928169
Scaper	7.11015e-06	-0.35628	0.364	0.394	0.125978	0.923858
Slc1a3	0.0722634	-0.335166	0.351	0.38	1	0.923684
Kcnc3	0.00543616	-0.264561	0.264	0.286	1	0.923077
Adam10	0.0156768	-0.279341	0.334	0.362	1	0.922652
Ube2e2	9.05517e-17	-0.449313	0.63	0.683	1.60439e-12	0.922401
Gabbr1	0.00204351	-0.254055	0.294	0.319	1	0.92163
Rab6b	4.57365e-06	-0.418018	0.403	0.438	0.081036	0.920091
Stxbp5l	1.03223e-12	-0.561068	0.456	0.496	1.82891e-08	0.919355
Cadps2	4.72888e-12	-0.926296	0.426	0.465	8.37863e-08	0.916129
Fosb	0.000731394	-0.308221	0.256	0.28	1	0.914285
Ophn1	3.71934e-05	-0.301733	0.33	0.361	0.658993	0.914127
Cacna1c	1.12488e-09	-0.71706	0.417	0.457	1.99306e-05	0.912472
Sept3	1.43906e-07	-0.369097	0.349	0.383	0.00254972	0.911227
Eml5	2.26238e-11	-0.395956	0.399	0.438	4.00848e-07	0.910959
Hivep2	2.3599e-09	-0.480492	0.461	0.507	4.18128e-05	0.90927
Lpp	9.41748e-05	-0.358892	0.415	0.457	1	0.908096
Pkia	5.43978e-06	-0.313713	0.334	0.368	0.0963821	0.907608
Sphkap	0.000299318	-0.441788	0.329	0.363	1	0.906336
Unc13a	5.66497e-06	-0.306758	0.277	0.307	0.100372	0.90228
St6galnac3	6.03101e-06	-0.337094	0.258	0.286	0.106858	0.902098
Plcl1	6.03962e-08	-0.41291	0.35	0.388	0.0010701	0.902062
Gucy1a2	0.00045738	-0.306126	0.341	0.38	1	0.897368
Mapt	0.00338517	-0.286142	0.208	0.232	1	0.896551
Wnk2	0.00401002	-0.354704	0.336	0.375	1	0.896
Kctd1	0.0140387	-0.252737	0.219	0.245	1	0.893877
Prkd1	3.40825e-09	-0.37283	0.299	0.336	6.03874e-05	0.889881
Dtl	0.00137037	-0.290859	0.233	0.262	1	0.889313
Asxl3	3.75828e-09	-0.388333	0.397	0.447	6.65893e-05	0.888143
Baz2a	0.027043	-0.260137	0.262	0.295	1	0.888135
Arhgap42	0.00774263	-0.256518	0.234	0.264	1	0.886363
Ppp1r14c	0.000140625	-0.489151	0.342	0.386	1	0.88601
Opcml	6.81028e-09	-0.806032	0.396	0.447	0.000120665	0.885906
Dopey1	0.00853475	-0.256875	0.264	0.299	1	0.882943
Slc44a1	0.000615137	-0.324918	0.263	0.299	1	0.879598
Ano4	0.147542	-0.298715	0.197	0.224	1	0.879464
Sergef	0.000229601	-0.25228	0.178	0.203	1	0.876847
Cers6	0.000229249	-0.28103	0.216	0.247	1	0.874494
Grk3	0.000169184	-0.308833	0.229	0.262	1	0.874045
Myt1	4.70379e-08	-0.475006	0.311	0.357	0.000833417	0.871148
Mkl2	0.406887	-0.265194	0.189	0.217	1	0.870967
Kcnh8	0.00193788	-0.302316	0.218	0.251	1	0.868526
Foxn2	0.024138	-0.280562	0.218	0.251	1	0.868526
Ahcyl2	0.000513378	-0.2695	0.234	0.27	1	0.866666
Kirrel3	0.000242506	-0.813356	0.117	0.135	1	0.866666
Sh3gl2	6.71751e-26	-0.653331	0.49	0.568	1.19021e-21	0.862676
Ptprn2	4.05243e-15	-0.564166	0.47	0.545	7.18009e-11	0.862385
Adgrl2	2.99841e-05	-0.40277	0.35	0.407	0.531259	0.859951
Pclo	1.13496e-14	-0.561374	0.399	0.464	2.01091e-10	0.859914
Fhit	0.000266143	-0.446516	0.244	0.284	1	0.859155
Ina	0.348728	-0.251706	0.158	0.184	1	0.858695
Rps6ka3	3.62096e-07	-0.512043	0.34	0.396	0.00641561	0.858586
Rims1	9.70959e-22	-0.737268	0.436	0.508	1.72035e-17	0.858268
Mgat4c	0.000695593	-0.4613	0.244	0.285	1	0.85614
Pcdha11	0.00131186	-0.266155	0.184	0.215	1	0.855814
Fgf14	1.5024e-07	-1.1439	0.274	0.321	0.00266195	0.853582
Nkain1	6.70981e-05	-0.327741	0.23	0.271	1	0.848708
Washc2	0.00124888	-0.284048	0.224	0.264	1	0.848485
Ptprj	0.00322809	-0.267011	0.179	0.211	1	0.848341
Ghr	0.00021398	-0.358142	0.233	0.275	1	0.847272
Arhgap26	0.0102896	-0.294133	0.142	0.168	1	0.845238
Kcnk10	2.04016e-05	-0.292538	0.17	0.202	0.361476	0.841584
Glce	7.28031e-13	-0.606497	0.341	0.406	1.28993e-08	0.839901
Mir124a-1hg	2.2138e-07	-0.517998	0.278	0.331	0.00392242	0.839879
Ppp2r2b	1.76907e-08	-0.594529	0.271	0.323	0.000313445	0.839009
Lig1	0.000118234	-0.30655	0.187	0.223	1	0.838565
Dlgap3	1.06333e-07	-0.341573	0.276	0.33	0.001884	0.836363
Zswim8	1.3369e-05	-0.277797	0.202	0.242	0.236871	0.83471
Dlg4	0.00544317	-0.263371	0.166	0.199	1	0.83417
Nrep	1.77445e-08	-0.359284	0.221	0.266	0.000314397	0.830827
Dlgap4	0.000196645	-0.384168	0.275	0.331	1	0.830815
Kidins220	1.55468e-10	-0.452441	0.307	0.37	2.75459e-06	0.82973
Rnf150	2.06204e-08	-0.387288	0.256	0.309	0.000365352	0.828479
Stard9	0.000337138	-0.339797	0.239	0.289	1	0.826989
Ankrd12	3.45643e-07	-0.375657	0.254	0.308	0.0061241	0.824675
Arpp21	6.24915e-21	-1.20975	0.344	0.418	1.10722e-16	0.822966
Kif5a	0.000404754	-0.330116	0.19	0.231	1	0.82251
Crebrf	8.73111e-05	-0.328013	0.222	0.27	1	0.822222
Eml6	4.96048e-08	-0.321201	0.21	0.256	0.000878897	0.820312
Arhgap44	4.81444e-05	-0.282425	0.18	0.22	0.853022	0.818181
Tcte2	9.34404e-07	-0.324338	0.184	0.225	0.0165558	0.817777
Zfp804a	0.000588613	-0.350701	0.193	0.237	1	0.814346
Cntn2	1.25096e-27	-1.08523	0.429	0.528	2.21645e-23	0.8125
Prkdc	3.70026e-05	-0.277345	0.169	0.21	0.655613	0.804762
Nrg1	3.31343e-21	-1.10687	0.387	0.481	5.87074e-17	0.804574
Otud7a	4.30625e-13	-0.500806	0.328	0.408	7.62981e-09	0.803921
Chsy3	0.000362132	-0.291611	0.135	0.168	1	0.803571
Hells	3.98711e-07	-0.372501	0.184	0.23	0.00706437	0.8
Kctd8	3.70902e-08	-0.510198	0.215	0.27	0.000657164	0.796296
Thra	0.00397662	-0.316477	0.176	0.222	1	0.792792
Gmds	2.72001e-13	-0.379151	0.257	0.325	4.81932e-09	0.790769
Ralyl	7.55417e-10	-0.595187	0.259	0.328	1.33845e-05	0.789634
Pde10a	2.68454e-10	-0.55552	0.238	0.302	4.75647e-06	0.788079
Obscn	0.000107035	-0.416507	0.18	0.23	1	0.782608
Acer3	0.000119653	-0.269539	0.133	0.17	1	0.782352
Plppr3	0.0446004	-0.278433	0.139	0.178	1	0.780898
Aig1	8.99034e-07	-0.401907	0.203	0.262	0.0159291	0.774809
Prkca	9.46651e-09	-0.299528	0.14	0.181	0.000167728	0.77348
Pou2f2	1.04034e-07	-0.323858	0.152	0.197	0.00184328	0.771573
Osbpl6	1.70058e-06	-0.338543	0.185	0.24	0.0301308	0.770833
Nrxn2	6.98527e-11	-0.43267	0.204	0.265	1.23765e-06	0.769811
Tcf7l2	0.000111117	-0.327369	0.15	0.195	1	0.76923
Syne1	7.74165e-08	-0.661584	0.182	0.237	0.00137167	0.767932
Lrrtm3	0.00311072	-0.517713	0.119	0.155	1	0.767741
Tmtc2	2.15842e-49	-1.0384	0.442	0.582	3.82428e-45	0.75945
Slit2	0.000512695	-0.274732	0.11	0.145	1	0.75862
Cadm3	2.12423e-12	-0.62875	0.267	0.352	3.76371e-08	0.758523
Angpt1	1.36311e-06	-0.294152	0.113	0.15	0.0241516	0.753333
Parp8	7.27909e-08	-0.332769	0.174	0.231	0.00128971	0.753246
Cpeb4	0.000253044	-0.326398	0.164	0.218	1	0.752293
Phactr3	0.0058626	-0.255439	0.097	0.129	1	0.751937
Elmo1	5.9335e-17	-0.823809	0.301	0.403	1.0513e-12	0.746898
Lingo1	0.000182803	-0.290087	0.118	0.158	1	0.746835
Asic2	1.07229e-08	-0.600354	0.105	0.141	0.000189988	0.74468
Adarb1	1.58839e-06	-0.301283	0.137	0.184	0.0281431	0.744565
Ctdspl	8.79736e-10	-0.288307	0.134	0.18	1.55872e-05	0.744444
Celf3	5.13739e-10	-0.413946	0.175	0.236	9.10244e-06	0.741525
Fnbp1	2.45984e-11	-0.51539	0.219	0.296	4.35834e-07	0.739865
Atxn1	2.80578e-13	-0.508037	0.236	0.32	4.97128e-09	0.7375
Mcm6	2.57669e-05	-0.328803	0.129	0.175	0.456539	0.737142
Map3k13	6.00604e-11	-0.512217	0.213	0.29	1.06415e-06	0.734483
Ica1	7.54797e-05	-0.29711	0.127	0.173	1	0.734104
Lrp1	4.85912e-05	-0.32765	0.133	0.183	0.860939	0.726776
Epha3	8.28294e-08	-0.354065	0.141	0.195	0.00146757	0.723077
Samd12	1.49769e-26	-0.978448	0.307	0.426	2.65361e-22	0.720657
Cpeb3	3.5756e-11	-0.327785	0.142	0.198	6.33524e-07	0.717171
Serpini1	1.45941e-06	-0.285432	0.098	0.137	0.0258578	0.715328
Fos	3.01803e-07	-0.285191	0.096	0.135	0.00534735	0.711111
Tanc2	1.25807e-05	-0.257596	0.078	0.11	0.222904	0.70909
Lama2	7.84334e-06	-0.546759	0.173	0.244	0.138968	0.709016
Atp9a	2.69097e-08	-0.311892	0.116	0.164	0.000476786	0.707317
Sel1l3	0.000328639	-0.298729	0.111	0.157	1	0.707006
Kdm5b	1.43032e-15	-0.540312	0.236	0.334	2.53424e-11	0.706587
Ank1	1.25868e-07	-0.263314	0.089	0.126	0.00223012	0.706349
Ckb	6.85088e-05	-0.366409	0.137	0.195	1	0.702564
Gpr158	1.93864e-18	-0.746865	0.254	0.362	3.43488e-14	0.701657
Cacnb4	9.26138e-08	-0.512031	0.169	0.242	0.00164093	0.698347
Grk5	5.40393e-06	-0.304193	0.126	0.181	0.0957468	0.696132
Ncan	1.75741e-08	-0.355806	0.123	0.177	0.000311377	0.694915
Greb1l	2.05175e-14	-0.518835	0.198	0.285	3.63528e-10	0.694737
Fbxl20	9.56102e-14	-0.515427	0.223	0.321	1.69402e-09	0.694704
Dnajc6	0.000546072	-0.302466	0.095	0.137	1	0.69343
Dpysl3	1.84344e-08	-0.413929	0.135	0.195	0.00032662	0.692307
Tenm1	2.63093e-11	-0.616329	0.155	0.224	4.66148e-07	0.691964
Cnksr3	3.71459e-05	-0.325062	0.109	0.158	0.658151	0.689873
Kcnd2	4.41491e-15	-1.16495	0.168	0.245	7.82234e-11	0.685714
Prickle2	2.74114e-05	-0.500701	0.137	0.2	0.485674	0.685
Sgsm1	3.00487e-08	-0.327038	0.108	0.158	0.000532402	0.683544
Dopey2	1.29873e-06	-0.428106	0.146	0.215	0.023011	0.679069
L3mbtl3	4.43644e-09	-0.444459	0.165	0.244	7.86048e-05	0.676229
Camk2d	3.04363e-25	-0.793683	0.267	0.395	5.39271e-21	0.675949
Mmp24	6.28279e-14	-0.563082	0.171	0.254	1.11318e-09	0.673228
Thsd7b	7.48804e-12	-0.481639	0.092	0.137	1.32673e-07	0.671532
Cttnbp2	1.52452e-17	-0.500276	0.186	0.278	2.70114e-13	0.669065
Map3k12	4.93486e-07	-0.291681	0.1	0.15	0.00874359	0.666666
Hivep3	1.77011e-38	-1.05815	0.267	0.403	3.13629e-34	0.662531
Vps8	1.61566e-09	-0.320059	0.102	0.154	2.86262e-05	0.662337
March3	2.09559e-09	-0.458758	0.131	0.198	3.71297e-05	0.661616
Itpr2	1.33836e-06	-0.288154	0.084	0.127	0.023713	0.661417
Vav3	0.000309546	-0.282678	0.075	0.115	1	0.652173
Srgap3	2.30109e-36	-0.919497	0.264	0.405	4.07706e-32	0.651852
Fam214a	6.57113e-11	-0.466315	0.142	0.218	1.16427e-06	0.651376
Nrxn3	3.98468e-17	-1.13268	0.175	0.269	7.06006e-13	0.650557
Rgs7	5.10754e-12	-0.541168	0.156	0.24	9.04954e-08	0.65
Kdm7a	1.82072e-11	-0.498621	0.166	0.256	3.22596e-07	0.648437
Syn3	7.20833e-17	-0.819577	0.184	0.284	1.27717e-12	0.647887
Eif2ak4	1.80354e-13	-0.278512	0.088	0.136	3.19552e-09	0.647058
Apc2	1.98263e-09	-0.392056	0.108	0.167	3.51283e-05	0.646706
Nfasc	3.93726e-17	-0.624863	0.173	0.268	6.97604e-13	0.645522
Nyap2	2.83482e-18	-0.588991	0.17	0.264	5.02274e-14	0.643939
Cul9	4.73213e-06	-0.296363	0.088	0.137	0.0838439	0.642335
Runx1t1	3.78702e-06	-0.304508	0.07	0.109	0.0670985	0.642201
Gli3	9.6404e-11	-0.437241	0.114	0.179	1.70809e-06	0.636871
Brinp1	2.01457e-12	-0.59184	0.146	0.23	3.56941e-08	0.634782
Syt1	2.61172e-10	-0.623359	0.125	0.197	4.62745e-06	0.634517
Camk4	2.24592e-08	-0.551854	0.1	0.158	0.000397933	0.632911
Ephb1	1.39777e-19	-0.936665	0.161	0.256	2.47657e-15	0.628906
Cacna1e	6.98542e-25	-1.1816	0.183	0.293	1.23768e-20	0.624573
Eps8	5.90021e-10	-0.346737	0.068	0.109	1.0454e-05	0.623853
Dpf3	1.80764e-05	-0.342842	0.068	0.11	0.320278	0.618181
Cntn1	3.56765e-10	-0.520686	0.102	0.167	6.32116e-06	0.610778
Grin2b	6.77694e-48	-1.31627	0.272	0.446	1.20074e-43	0.609865
Adcy9	6.97145e-11	-0.303074	0.079	0.13	1.2352e-06	0.607692
Synpr	2.9509e-31	-0.913451	0.218	0.361	5.22841e-27	0.603878
Hmgcll1	6.54875e-05	-0.263616	0.064	0.106	1	0.603773
Lzts1	2.43217e-16	-0.570135	0.141	0.234	4.30932e-12	0.602564
Rgs17	4.59175e-11	-0.278667	0.068	0.113	8.13567e-07	0.601769
Taok3	2.96432e-12	-0.352356	0.088	0.149	5.25219e-08	0.590604
Cyfip2	1.00334e-12	-0.464343	0.105	0.179	1.77772e-08	0.586592
Ndst3	1.52745e-20	-0.799534	0.151	0.258	2.70633e-16	0.585271
Fam110b	1.35043e-07	-0.299235	0.073	0.125	0.00239269	0.584
Dtna	1.0584e-14	-0.546608	0.122	0.213	1.87527e-10	0.57277
Unc5c	4.31297e-20	-1.26038	0.148	0.259	7.64172e-16	0.571428
Cntnap4	7.73965e-23	-0.69003	0.122	0.216	1.37131e-18	0.564815
Syt9	1.67578e-11	-0.41056	0.088	0.156	2.96915e-07	0.564102
Epb41l1	7.61274e-27	-0.836681	0.153	0.272	1.34882e-22	0.5625
Ncam2	4.79656e-13	-0.583113	0.097	0.175	8.49854e-09	0.554285
Pdzrn3	1.61871e-22	-0.607367	0.116	0.21	2.86803e-18	0.552381
Hcn1	3.69011e-08	-0.526215	0.09	0.163	0.000653814	0.552147
Ppm1h	1.28438e-35	-1.03054	0.187	0.347	2.27566e-31	0.538905
Adamts19	4.51909e-08	-0.365755	0.059	0.111	0.000800692	0.531531
Lrp1b	1.44084e-23	-0.966844	0.097	0.187	2.55288e-19	0.518716
Plxdc2	1.51329e-17	-0.469549	0.08	0.155	2.68125e-13	0.516129
Lin7a	1.81926e-09	-0.417385	0.063	0.123	3.22337e-05	0.512195
Arhgap20	9.7851e-13	-0.371965	0.065	0.127	1.73372e-08	0.511811
Gm26871	2.74307e-15	-0.451872	0.067	0.131	4.86017e-11	0.51145
Chrm3	3.82474e-17	-0.6367	0.083	0.163	6.77668e-13	0.509202
Unc5d	4.06737e-25	-0.972885	0.116	0.228	7.20656e-21	0.508772
Cacna1a	3.43071e-39	-1.08922	0.155	0.305	6.07853e-35	0.508197
Car10	3.52881e-25	-1.30391	0.101	0.2	6.25235e-21	0.505
Chrna3	1.14606e-12	-0.435593	0.069	0.137	2.03059e-08	0.503649
Snap91	7.72676e-22	-0.602839	0.107	0.214	1.36903e-17	0.5
Atp8a2	1.83557e-19	-0.441762	0.076	0.153	3.25227e-15	0.496732
Pacsin1	7.29537e-12	-0.316828	0.053	0.107	1.29259e-07	0.495327
Wscd2	4.67934e-26	-0.584954	0.086	0.179	8.29085e-22	0.480447
Pld5	7.56633e-13	-0.403418	0.056	0.118	1.3406e-08	0.474576
March4	3.60223e-12	-0.354727	0.048	0.102	6.38244e-08	0.470588
Adamtsl3	1.48105e-21	-0.731949	0.092	0.199	2.62412e-17	0.462311
Spock1	1.67085e-16	-0.688323	0.069	0.15	2.96041e-12	0.46
Cpeb2	5.67799e-12	-0.360523	0.053	0.116	1.00603e-07	0.456896
Srcin1	1.17553e-21	-0.569075	0.081	0.179	2.08281e-17	0.452514
Lhfp	8.19248e-10	-0.472174	0.047	0.104	1.45154e-05	0.451923
Slc4a4	1.90016e-18	-0.60067	0.064	0.147	3.3667e-14	0.435374
Luzp2	9.39981e-41	-0.896791	0.093	0.216	1.66546e-36	0.430555
Ntrk2	8.51406e-32	-0.775003	0.09	0.213	1.50852e-27	0.422535
Zmat4	1.87843e-19	-0.78893	0.068	0.163	3.32819e-15	0.417178
Ryr2	7.26003e-23	-0.957536	0.069	0.173	1.28633e-18	0.398844
Nol4l	3.54165e-28	-0.579292	0.064	0.161	6.27509e-24	0.397515
Gdpd5	1.05457e-19	-0.408048	0.042	0.108	1.86849e-15	0.388889
Gabbr2	2.97749e-28	-0.779572	0.068	0.178	5.27552e-24	0.382022
Ksr2	1.66177e-12	-0.405618	0.04	0.105	2.94432e-08	0.380952
Cdh10	9.6369e-20	-0.483937	0.04	0.107	1.70747e-15	0.373831
Lrrc4c	1.01771e-30	-0.974917	0.065	0.176	1.80317e-26	0.369318
L1cam	1.92283e-19	-0.521174	0.034	0.121	3.40687e-15	0.280992
Grm1	4.26964e-32	-0.960816	0.038	0.152	7.56494e-28	0.25

## Sheet: cluster 6
gene	p_val	avg_log2FC	fraction + in cluster	fraction + not in cluster	p_val_adj	ratio + in:out of cluster
Dok6	3.27683e-46	0.484101	0.164	0.033	5.8059e-42	4.96968
Adamts18	6.49311e-65	0.529128	0.248	0.053	1.15045e-60	4.67924
Kcnk2	6.32357e-52	0.416891	0.229	0.053	1.12041e-47	4.32075
Gm42397	3.84931e-40	0.363433	0.17	0.04	6.82021e-36	4.24999
Unc5b	2.40112e-50	0.345084	0.19	0.045	4.25431e-46	4.22221
Fat2	1.77902e-64	0.439679	0.251	0.061	3.15207e-60	4.11475
Pitpnm3	4.15012e-40	0.330565	0.19	0.047	7.35319e-36	4.04254
Kazn	7.39916e-55	0.424731	0.246	0.062	1.31098e-50	3.96774
Il16	9.5888e-47	0.310481	0.193	0.049	1.69894e-42	3.93877
Zmat4	5.89527e-135	0.835062	0.512	0.13	1.04452e-130	3.93846
Gm13052	2.21466e-74	0.503634	0.304	0.078	3.92394e-70	3.89743
Rasgef1c	5.51268e-37	0.263724	0.162	0.042	9.76737e-33	3.85713
L1cam	1.36529e-77	0.50554	0.364	0.096	2.41902e-73	3.79166
Gabra2	4.89646e-48	0.388031	0.219	0.058	8.67554e-44	3.77586
Grm1	2.47937e-101	0.691811	0.446	0.121	4.39294e-97	3.68595
Brinp3	1.95097e-46	0.423397	0.239	0.068	3.45672e-42	3.5147
Col12a1	3.63338e-39	0.260051	0.151	0.043	6.43763e-35	3.51162
Ryr2	3.41534e-123	0.78379	0.495	0.142	6.05129e-119	3.48591
Galr1	3.73934e-38	0.293574	0.216	0.065	6.62536e-34	3.32307
Grin1	8.21939e-43	0.28619	0.212	0.064	1.45631e-38	3.31249
Ephb1	3.51325e-173	0.938239	0.7	0.216	6.22477e-169	3.24074
Dpf3	2.15753e-60	0.44394	0.299	0.093	3.82271e-56	3.21505
Ube2ql1	1.48837e-30	0.257488	0.186	0.058	2.6371e-26	3.20689
Lrp1b	7.37564e-110	0.8643	0.493	0.157	1.30682e-105	3.14013
Car10	2.04284e-135	0.904651	0.526	0.169	3.6195e-131	3.11242
Lrrc4c	2.47776e-99	0.664614	0.456	0.147	4.3901e-95	3.10204
Zbtb46	7.49398e-42	0.262039	0.207	0.067	1.32778e-37	3.08955
Cdh10	2.08583e-55	0.457861	0.276	0.09	3.69567e-51	3.06666
Runx1t1	5.07016e-44	0.38513	0.285	0.093	8.98331e-40	3.06451
Adamtsl3	2.93459e-86	0.603005	0.512	0.168	5.19951e-82	3.04762
Hcn1	2.54347e-79	0.54865	0.419	0.138	4.50652e-75	3.03623
Cntn1	2.56667e-82	0.549646	0.429	0.143	4.54763e-78	3
Lhfp	5.13447e-50	0.368076	0.263	0.088	9.09725e-46	2.98863
Tanc2	1.05718e-45	0.404299	0.283	0.095	1.87311e-41	2.97894
Unc5c	2.13182e-150	0.955707	0.649	0.222	3.77716e-146	2.92342
Gm29521	9.32449e-26	0.286057	0.205	0.071	1.65211e-21	2.88732
Arhgap20	2.83678e-42	0.365361	0.31	0.108	5.02621e-38	2.87037
Slc4a4	3.81688e-65	0.439242	0.358	0.125	6.76275e-61	2.864
Cpeb2	2.19108e-45	0.315031	0.28	0.099	3.88215e-41	2.82828
Ndst3	9.56469e-136	0.67698	0.625	0.222	1.69467e-131	2.81531
Cntnap4	3.28083e-98	0.589572	0.521	0.186	5.81298e-94	2.80107
Cacna1e	1.49797e-170	0.898033	0.708	0.254	2.6541e-166	2.7874
Ksr2	1.339e-37	0.272524	0.247	0.089	2.37243e-33	2.77528
Gm26871	2.47991e-55	0.359177	0.312	0.113	4.39391e-51	2.76106
Camk4	7.35323e-56	0.350617	0.375	0.137	1.30285e-51	2.73722
Kctd16	3.39498e-35	0.271092	0.204	0.075	6.01522e-31	2.72
Ntrk2	3.48131e-79	0.4963	0.494	0.183	6.16819e-75	2.69945
Chrm3	1.88858e-63	0.480785	0.38	0.141	3.34619e-59	2.69503
Srcin1	6.60764e-68	0.427467	0.415	0.154	1.17074e-63	2.6948
Pacsin1	6.00289e-37	0.257709	0.247	0.092	1.06359e-32	2.68478
Epb41l1	1.59775e-115	0.702362	0.633	0.236	2.83089e-111	2.6822
Atp8a2	1.88808e-55	0.365768	0.348	0.132	3.34529e-51	2.63636
Gabbr2	7.70001e-61	0.425034	0.402	0.153	1.36429e-56	2.62745
Cacna1a	3.43484e-145	0.656453	0.693	0.265	6.08585e-141	2.61509
Sez6	2.83409e-39	0.294532	0.276	0.106	5.02144e-35	2.60377
Pde9a	2.36125e-37	0.314924	0.294	0.113	4.18367e-33	2.60177
Nol4l	4.99244e-58	0.351974	0.361	0.139	8.84561e-54	2.59712
Rgs17	1.54657e-34	0.261859	0.257	0.099	2.74022e-30	2.59596
Syn3	2.39571e-107	0.723221	0.645	0.249	4.24473e-103	2.59036
Unc5d	2.54668e-76	0.63017	0.499	0.199	4.5122e-72	2.50754
Kcnk1	5.75294e-50	0.321325	0.33	0.132	1.01931e-45	2.5
Syt9	7.26869e-48	0.328528	0.341	0.137	1.28787e-43	2.48905
Wscd2	9.05867e-51	0.32798	0.388	0.157	1.60502e-46	2.47134
Dpysl3	1.82489e-54	0.360278	0.426	0.174	3.23334e-50	2.44827
Add3	6.25557e-27	0.285968	0.266	0.109	1.10836e-22	2.44036
Apc2	3.40584e-42	0.318188	0.358	0.148	6.03446e-38	2.41892
Nyap2	7.92147e-73	0.453419	0.566	0.234	1.40353e-68	2.4188
Luzp2	1.36025e-60	0.43233	0.456	0.189	2.41008e-56	2.4127
Kcnd3	1.57077e-44	0.346533	0.277	0.116	2.7831e-40	2.38793
Mapk4	7.41789e-56	0.370991	0.407	0.171	1.3143e-51	2.38012
Snap91	6.74096e-47	0.336798	0.447	0.188	1.19436e-42	2.37766
Mmp24	1.9128e-69	0.42422	0.537	0.227	3.38911e-65	2.36564
Ppm1h	1.13683e-111	0.627434	0.724	0.307	2.01424e-107	2.35831
Prdm8	2.00333e-42	0.273562	0.323	0.138	3.5495e-38	2.34058
Kcnd2	6.19916e-77	0.398699	0.509	0.22	1.09837e-72	2.31364
Dtna	8.85214e-50	0.369783	0.436	0.19	1.56842e-45	2.29474
Arpp21	8.69621e-220	1.02662	0.866	0.379	1.54079e-215	2.28496
Mapt	3.94361e-64	0.388766	0.482	0.212	6.98729e-60	2.27358
Atp9a	1.00387e-42	0.25516	0.335	0.148	1.77865e-38	2.26351
Nfasc	5.714e-69	0.398269	0.543	0.24	1.01241e-64	2.2625
Hivep3	1.29923e-154	0.84039	0.813	0.362	2.30197e-150	2.24586
Plxna2	1.07142e-88	0.596257	0.593	0.267	1.89833e-84	2.22097
Grin2b	3.44507e-161	0.758639	0.884	0.401	6.10398e-157	2.20449
Pou2f2	1.24794e-31	0.282388	0.392	0.179	2.2111e-27	2.18994
Elmo1	7.20956e-136	0.697044	0.8	0.366	1.27739e-131	2.18579
Tenm2	7.87558e-52	0.347184	0.463	0.214	1.39539e-47	2.16355
Vat1l	7.83643e-35	0.284651	0.337	0.157	1.38846e-30	2.1465
Cacnb4	1.21445e-50	0.278415	0.47	0.22	2.15176e-46	2.13636
Nrxn3	2.58453e-60	0.264027	0.518	0.243	4.57927e-56	2.13169
Pcdha11	4.96369e-34	0.289806	0.419	0.197	8.79467e-30	2.1269
Lzts1	9.8144e-43	0.25924	0.448	0.211	1.73892e-38	2.12322
Ppp2r2b	5.29412e-71	0.470722	0.63	0.297	9.38012e-67	2.12121
Celf3	3.74657e-38	0.32793	0.456	0.215	6.63816e-34	2.12093
Synpr	7.07718e-96	0.526845	0.69	0.326	1.25394e-91	2.11656
Samd12	2.15297e-121	0.512322	0.819	0.388	3.81464e-117	2.11082
Ppp1r14c	1.28692e-108	0.621068	0.745	0.356	2.28017e-104	2.0927
Mir124a-1hg	8.28604e-68	0.440349	0.635	0.304	1.46812e-63	2.08882
Neurod1	1.15453e-59	0.393116	0.629	0.303	2.0456e-55	2.07591
Dlg2	3.13035e-78	0.468868	0.602	0.294	5.54635e-74	2.04762
L3mbtl4	5.31241e-34	0.265389	0.379	0.187	9.41253e-30	2.02674
Cacna1c	6.17103e-148	0.786031	0.858	0.424	1.09338e-143	2.02358
Efr3b	7.62737e-46	0.27677	0.469	0.235	1.35142e-41	1.99574
St6galnac3	1.978e-40	0.339218	0.529	0.266	3.50462e-36	1.98872
Myt1	9.8159e-50	0.364157	0.651	0.331	1.73918e-45	1.96677
Csmd2	1.56826e-36	0.321655	0.392	0.201	2.77864e-32	1.95025
Slc44a1	1.30889e-43	0.307052	0.542	0.278	2.31909e-39	1.94964
Glce	8.32941e-79	0.488032	0.733	0.377	1.47581e-74	1.9443
Nrg1	8.00767e-152	0.712405	0.865	0.446	1.4188e-147	1.93946
Camk2d	1.0994e-76	0.474565	0.701	0.363	1.94792e-72	1.93113
Cadm3	4.88738e-54	0.294172	0.625	0.325	8.65947e-50	1.92308
Cadps2	1.85232e-161	0.823986	0.833	0.435	3.28195e-157	1.91494
Apba1	3.36503e-68	0.474479	0.732	0.384	5.96217e-64	1.90625
Grk3	5.1073e-38	0.262499	0.466	0.245	9.04911e-34	1.90204
Snhg14	4.56885e-57	0.353473	0.684	0.36	8.09509e-53	1.9
Kcnma1	1.02593e-60	0.418747	0.619	0.327	1.81774e-56	1.89297
Dscam	6.06652e-37	0.254562	0.508	0.273	1.07487e-32	1.86081
Myt1l	3.03402e-56	0.434922	0.772	0.418	5.37568e-52	1.84689
Gap43	3.62223e-36	0.256141	0.583	0.316	6.41787e-32	1.84494
Igsf21	1.41347e-53	0.307604	0.645	0.352	2.50439e-49	1.83239
Cadm2	6.98114e-195	0.982861	0.912	0.502	1.23692e-190	1.81673
Ror1	3.30235e-45	0.396878	0.657	0.362	5.85111e-41	1.81492
Rps6ka3	4.71726e-69	0.409271	0.668	0.372	8.35804e-65	1.7957
Pag1	1.74395e-35	0.261017	0.534	0.298	3.08992e-31	1.79195
Sept3	1.1988e-46	0.31548	0.646	0.361	2.12404e-42	1.78947
Scaper	3.6894e-42	0.327059	0.662	0.372	6.53688e-38	1.77957
Kidins220	6.19277e-39	0.257824	0.613	0.347	1.09724e-34	1.76657
Dner	2.68701e-48	0.379463	0.736	0.418	4.76085e-44	1.76077
Opcml	9.95051e-73	0.486022	0.738	0.422	1.76303e-68	1.74881
Cntn2	1.05174e-69	0.335469	0.864	0.496	1.86347e-65	1.74194
Myo10	1.5659e-41	0.256859	0.59	0.34	2.77446e-37	1.73529
Park2	2.07584e-43	0.272087	0.584	0.337	3.67797e-39	1.73294
Rims1	2.75418e-73	0.385256	0.821	0.48	4.87985e-69	1.71042
Usp29	1.41047e-48	0.271075	0.653	0.382	2.49907e-44	1.70942
Gab1	3.19246e-45	0.311849	0.652	0.383	5.6564e-41	1.70235
Gm20696	1.32359e-32	0.290181	0.714	0.42	2.34514e-28	1.7
Stxbp5l	1.54251e-54	0.367466	0.798	0.47	2.73302e-50	1.69787
Hs6st3	4.1655e-79	0.598054	0.77	0.455	7.38044e-75	1.69231
Kcnj6	1.78846e-64	0.410699	0.805	0.478	3.16879e-60	1.6841
Pclo	1.34054e-56	0.287652	0.737	0.439	2.37517e-52	1.67882
Egfr	4.83748e-59	0.389865	0.791	0.477	8.57104e-55	1.65828
Msra	1.84857e-64	0.446674	0.761	0.46	3.27529e-60	1.65435
Cacna2d3	4.46642e-44	0.42643	0.625	0.378	7.9136e-40	1.65344
Clvs1	4.44736e-54	0.325485	0.793	0.48	7.87984e-50	1.65208
Zfp385b	2.57047e-70	0.433393	0.824	0.499	4.55435e-66	1.6513
Hivep2	2.1678e-53	0.361375	0.795	0.482	3.84091e-49	1.64938
St18	3.16492e-39	0.278184	0.785	0.476	5.60761e-35	1.64916
Erc2	1.46824e-37	0.265928	0.659	0.4	2.60143e-33	1.6475
Ldlrad4	3.70196e-38	0.26387	0.679	0.416	6.55913e-34	1.63221
Tmtc2	1.77417e-98	0.516204	0.893	0.548	3.14347e-94	1.62956
Kcnj3	6.54514e-55	0.404327	0.843	0.523	1.15967e-50	1.61185
Kcnq5	1.00679e-91	0.773897	0.807	0.501	1.78384e-87	1.61078
Gpm6a	6.63415e-75	0.466589	0.907	0.574	1.17544e-70	1.58014
Pcdh9	9.61591e-42	0.266619	0.71	0.45	1.70375e-37	1.57778
Mtss1	1.08051e-82	0.504474	0.867	0.551	1.91446e-78	1.5735
Celf4	7.70042e-131	0.623577	0.934	0.595	1.36436e-126	1.56975
Dscaml1	5.2923e-54	0.281169	0.848	0.541	9.37689e-50	1.56747
Klhl29	4.95576e-119	0.645546	0.936	0.602	8.78062e-115	1.55482
Sorbs1	5.61682e-69	0.469174	0.888	0.577	9.95187e-65	1.53899
Fgf13	3.56394e-86	0.505109	0.881	0.573	6.31459e-82	1.53752
Sh3gl2	4.72453e-49	0.365795	0.833	0.542	8.37092e-45	1.5369
Sptbn1	2.27542e-25	0.254158	0.765	0.499	4.03158e-21	1.53307
March1	5.73494e-50	0.326738	0.855	0.559	1.01612e-45	1.52952
Dcx	6.12036e-33	0.255752	0.799	0.535	1.0844e-28	1.49346
Rasgef1b	7.67841e-58	0.398906	0.876	0.588	1.36046e-53	1.4898
Phf20l1	1.30529e-32	0.29912	0.811	0.546	2.31271e-28	1.48535
Nrcam	2.14758e-37	0.267331	0.833	0.563	3.80508e-33	1.47957
Sema6a	4.46439e-72	0.41052	0.927	0.645	7.91001e-68	1.43721
Ppfia2	1.64707e-60	0.36323	0.905	0.634	2.91828e-56	1.42744
Zfpm2	1.25817e-215	0.92565	0.969	0.687	2.22923e-211	1.41048
Xkr4	1.23796e-53	0.355429	0.931	0.661	2.19342e-49	1.40847
Zfp521	2.78835e-83	0.504982	0.937	0.667	4.9404e-79	1.4048
Cask	6.3322e-25	0.263968	0.845	0.61	1.12194e-20	1.38525
Adgrl3	8.81326e-32	0.285226	0.883	0.642	1.56153e-27	1.37539
Tnik	4.70725e-105	0.479848	0.975	0.731	8.3403e-101	1.33379
Kcnip4	1.71233e-05	-0.469673	0.288	0.217	0.303391	1.32719
Sox5	6.23582e-40	0.305743	0.914	0.69	1.10486e-35	1.32464
Plcb1	1.68685e-43	0.260909	0.937	0.711	2.98876e-39	1.31786
Anks1b	2.09223e-59	0.355798	0.944	0.723	3.70702e-55	1.30567
Ebf2	0.00984003	-0.251475	0.45	0.346	1	1.30058
Trpm3	0.000603121	-0.386071	0.263	0.203	1	1.29557
Nav3	1.07058e-36	0.261875	0.959	0.751	1.89685e-32	1.27696
Gli2	0.835014	-0.25552	0.761	0.601	1	1.26622
G2e3	0.0743178	-0.254468	0.434	0.344	1	1.26163
Lrig3	0.301404	-0.253686	0.626	0.497	1	1.25956
Sorcs2	0.00614802	-0.252542	0.369	0.293	1	1.25939
Sema7a	0.591138	-0.263743	0.648	0.515	1	1.25825
Adarb2	0.0232174	-0.261652	0.747	0.599	1	1.24708
Gpc6	0.58405	-0.346275	0.708	0.569	1	1.24429
Airn	0.0411066	-0.313443	0.419	0.337	1	1.24332
Rassf3	0.0464538	-0.266696	0.684	0.553	1	1.23689
Gramd1b	1.52071e-45	0.265017	0.943	0.763	2.69439e-41	1.23591
Kcnb2	1.42543e-64	0.350838	0.977	0.792	2.52557e-60	1.23359
Btbd11	0.384805	-0.307274	0.814	0.66	1	1.23333
Cntrl	0.276931	-0.255245	0.371	0.302	1	1.22848
Ckap5	0.752638	-0.294542	0.527	0.429	1	1.22844
Tmpo	0.322596	-0.266638	0.518	0.422	1	1.22749
Boc	0.0147655	-0.2674	0.811	0.661	1	1.22693
Gsg1l	0.0232485	-0.298833	0.886	0.727	1	1.21871
Alcam	0.626485	-0.319611	0.593	0.487	1	1.21766
Draxin	0.000409705	-0.306931	0.745	0.613	1	1.21533
Asap1	0.187375	-0.28135	0.706	0.581	1	1.21515
Smc2	0.657062	-0.300401	0.542	0.447	1	1.21253
Hjurp	0.0462644	-0.369922	0.599	0.497	1	1.20523
Sdk1	0.934587	-0.299436	0.816	0.679	1	1.20177
Pdzrn4	0.528892	-0.319321	0.448	0.373	1	1.20107
Rnf220	0.957644	-0.333106	0.844	0.703	1	1.20057
Tmem163	0.624099	-0.361733	0.769	0.643	1	1.19596
Cenpp	0.720178	-0.32823	0.426	0.357	1	1.19328
Pard3	1.6359e-05	-0.259229	0.8	0.672	0.289848	1.19048
Rbfox1	5.23905e-91	0.428644	0.985	0.83	9.28254e-87	1.18675
Mamdc2	0.177403	-0.255203	0.227	0.192	1	1.18229
Tox3	0.000442561	-0.285882	0.799	0.677	1	1.18021
Ntn1	9.4768e-06	-0.37291	0.801	0.68	0.16791	1.17794
Diaph3	0.226342	-0.440404	0.491	0.421	1	1.16627
Gria4	2.40576e-64	0.341557	0.985	0.852	4.26253e-60	1.1561
Arl6ip1	0.49717	-0.274432	0.246	0.213	1	1.15493
Fat3	0.521957	-0.427222	0.449	0.389	1	1.15424
Smc4	0.373663	-0.391313	0.485	0.421	1	1.15202
Kirrel3	0.921768	-0.790349	0.15	0.132	1	1.13636
Man1c1	2.96467e-05	-0.26479	0.876	0.774	0.52528	1.13178
Efcab11	0.514654	-0.305117	0.269	0.239	1	1.12552
Pde4d	4.41328e-123	0.535528	0.996	0.885	7.81946e-119	1.12542
Mki67	0.000148254	-0.678099	0.577	0.513	1	1.12476
Cadm1	1.89654e-10	-0.326372	0.926	0.824	3.36029e-06	1.12379
Ccser1	3.67291e-46	0.275563	0.987	0.882	6.50766e-42	1.11905
Foxp2	0.00036123	-0.26472	0.93	0.832	1	1.11779
Top2a	0.0287742	-0.501931	0.448	0.403	1	1.11166
Thsd7a	0.000298479	-0.365263	0.924	0.832	1	1.11058
Ank2	2.73989e-91	0.389241	0.994	0.9	4.85453e-87	1.10444
Rbfox3	1.86297e-61	0.351783	0.99	0.9	3.30081e-57	1.1
Cdh20	3.32757e-13	-0.322803	0.981	0.896	5.8958e-09	1.09487
Erbb4	6.30886e-84	0.405429	0.998	0.919	1.1178e-79	1.08596
Pde1c	3.6995e-05	-0.302553	0.948	0.875	0.655477	1.08343
Nrxn1	2.66197e-70	0.313198	0.997	0.924	4.71647e-66	1.079
Kif15	0.369542	-0.421507	0.357	0.332	1	1.0753
Lsamp	1.25523e-95	0.40449	0.997	0.932	2.22402e-91	1.06974
Racgap1	0.632804	-0.270676	0.233	0.22	1	1.05909
Anln	0.393602	-0.305528	0.224	0.212	1	1.0566
Ncapg	0.606118	-0.259071	0.193	0.183	1	1.05464
Neil3	0.921542	-0.300303	0.232	0.22	1	1.05454
Zeb1	2.32351e-13	-0.257093	0.988	0.946	4.11679e-09	1.0444
Grik2	3.01132e-83	0.360559	0.999	0.958	5.33546e-79	1.0428
Cit	0.00479971	-0.40482	0.294	0.284	1	1.03521
Incenp	0.210624	-0.328569	0.238	0.23	1	1.03478
Cenpf	0.00430059	-0.514238	0.306	0.297	1	1.0303
Cenpe	0.000579931	-0.547652	0.322	0.313	1	1.02875
Knl1	6.00626e-05	-0.467764	0.325	0.317	1	1.02524
Celf2	5.16925e-73	0.332615	0.999	0.975	9.15888e-69	1.02462
Kif20b	0.0151747	-0.439663	0.279	0.273	1	1.02198
Lockd	0.28865	-0.267341	0.187	0.183	1	1.02186
Kif11	0.054804	-0.492931	0.319	0.313	1	1.01917
Kif18a	0.666946	-0.356212	0.203	0.201	1	1.00995
Dcc	6.05421e-15	-0.312333	0.998	0.989	1.07269e-10	1.0091
Aspm	0.00758903	-0.589328	0.287	0.287	1	1
Ect2	0.997686	-0.371224	0.219	0.219	1	1
Ttk	0.0527483	-0.255944	0.158	0.158	1	0.999999
Kif4	0.0837261	-0.400483	0.236	0.238	1	0.991596
Bub1	0.0711114	-0.269629	0.169	0.173	1	0.976878
Ckap2l	0.123888	-0.268903	0.155	0.159	1	0.974842
Ckap2	0.229353	-0.268975	0.155	0.159	1	0.974842
Kif23	0.107574	-0.362634	0.192	0.198	1	0.969696
Nusap1	0.35896	-0.259475	0.154	0.159	1	0.968553
Tacc3	0.0840024	-0.27922	0.159	0.165	1	0.963636
Bora	0.130905	-0.29949	0.158	0.164	1	0.963414
Tpx2	0.00176687	-0.434608	0.225	0.236	1	0.953389
Arhgap11a	0.0638691	-0.257319	0.147	0.155	1	0.948386
Ccnf	0.211129	-0.251775	0.137	0.145	1	0.944827
Cdca2	0.000225216	-0.408175	0.211	0.224	1	0.941964
Mis18bp1	0.00217738	-0.38466	0.192	0.204	1	0.941176
Sgo2a	0.242459	-0.262614	0.131	0.14	1	0.935714
Knstrn	0.323037	-0.25963	0.119	0.128	1	0.929687
Depdc1b	0.0964339	-0.290857	0.133	0.145	1	0.917241
Prc1	0.0444965	-0.374439	0.171	0.187	1	0.914438
Kif18b	0.00394291	-0.285941	0.129	0.143	1	0.902097
Dlgap5	0.282571	-0.260787	0.116	0.129	1	0.899224
Bub1b	0.108277	-0.299024	0.141	0.158	1	0.892404
Kif14	0.00750144	-0.352964	0.137	0.161	1	0.850931
Hmmr	0.00170177	-0.315863	0.121	0.147	1	0.823129
Cenpa	1.89356e-05	-0.275355	0.088	0.111	0.335501	0.792792

## Sheet: cluster 7
gene	p_val	avg_log2FC	fraction + in cluster	fraction + not in cluster	p_val_adj	ratio + in:out of cluster
Wif1	8.88474e-29	0.508307	0.101	0.013	1.5742e-24	7.76917
Nptx1	4.31443e-66	0.830173	0.229	0.04	7.64431e-62	5.72499
Zbtb7c	3.7259e-97	1.19287	0.29	0.055	6.60155e-93	5.27272
Arhgap18	7.2755e-58	0.715639	0.206	0.041	1.28907e-53	5.02438
Etv5	1.94741e-118	1.14927	0.361	0.072	3.45042e-114	5.01388
Psrc1	1.62158e-37	0.458075	0.144	0.031	2.87312e-33	4.64515
Cenpa	5.14732e-131	1.11252	0.415	0.09	9.12002e-127	4.61111
Fam83d	1.21203e-34	0.402884	0.129	0.029	2.14747e-30	4.44826
Adam12	3.02766e-79	0.973998	0.275	0.062	5.36441e-75	4.43548
Pif1	1.71495e-82	0.780648	0.283	0.064	3.03855e-78	4.42187
Ube2c	2.97815e-56	0.581931	0.198	0.046	5.27669e-52	4.30434
Plk1	9.73401e-54	0.645606	0.215	0.05	1.72467e-49	4.29999
Cdc25c	7.48773e-86	0.836489	0.296	0.069	1.32668e-81	4.28985
Gas6	2.31296e-52	0.636404	0.193	0.045	4.0981e-48	4.28888
Notch1	1.15398e-21	0.404315	0.123	0.029	2.04463e-17	4.24136
Smtn	9.36429e-39	0.504707	0.169	0.04	1.65917e-34	4.22499
Ccnb1	9.78602e-76	0.799952	0.286	0.068	1.73389e-71	4.20588
Lifr	1.21937e-32	0.419053	0.132	0.032	2.16048e-28	4.12499
Gas2l3	2.26039e-81	0.922054	0.342	0.084	4.00496e-77	4.07142
Troap	3.83625e-95	0.865338	0.335	0.084	6.79707e-91	3.98809
Hmmr	7.26763e-132	1.18157	0.488	0.123	1.28768e-127	3.96748
Cdca3	2.52463e-24	0.353559	0.122	0.031	4.47313e-20	3.93547
Arhgap19	5.33958e-47	0.501675	0.173	0.044	9.46066e-43	3.93181
Kpna2	2.84791e-100	0.970812	0.365	0.094	5.04593e-96	3.88297
Cenpl	1.49686e-38	0.50462	0.17	0.044	2.65214e-34	3.86363
Cks2	1.70398e-35	0.482305	0.158	0.041	3.01912e-31	3.85365
Depdc1a	7.36017e-85	0.855438	0.327	0.085	1.30408e-80	3.84705
Aurka	4.51369e-51	0.606039	0.215	0.056	7.99736e-47	3.83928
Fign	3.72922e-25	0.408918	0.117	0.031	6.60743e-21	3.77418
Nek2	2.31959e-52	0.59978	0.222	0.059	4.10985e-48	3.76271
Cdc20	1.09606e-37	0.491977	0.173	0.046	1.94201e-33	3.76086
Bcl11b	7.57971e-47	0.630862	0.21	0.056	1.34297e-42	3.74999
Dlgap5	2.86212e-102	1.00046	0.409	0.11	5.0711e-98	3.71818
Gtse1	7.09294e-36	0.456013	0.156	0.042	1.25673e-31	3.71428
Kif2c	3.51062e-77	0.792832	0.295	0.08	6.22012e-73	3.6875
Depdc1b	1.92692e-128	1.09586	0.457	0.124	3.41411e-124	3.68548
Prc1	1.39789e-194	1.31261	0.588	0.16	2.47678e-190	3.675
Kif14	1.76814e-143	1.19745	0.503	0.137	3.1328e-139	3.67153
Parpbp	5.25093e-96	0.927112	0.363	0.099	9.30361e-92	3.66666
Cep55	1.65571e-62	0.788498	0.299	0.083	2.93359e-58	3.60241
Ankle1	5.54038e-49	0.562889	0.204	0.057	9.81644e-45	3.57894
Spdl1	2.49279e-38	0.5267	0.186	0.052	4.41673e-34	3.57692
Pld1	1.95175e-34	0.586215	0.164	0.046	3.45811e-30	3.56521
Mis18bp1	1.03669e-193	1.36577	0.624	0.176	1.8368e-189	3.54545
Ska1	1.36229e-43	0.489038	0.17	0.048	2.4137e-39	3.54166
Kifc5b	4.20551e-44	0.53627	0.198	0.056	7.45131e-40	3.53571
Ccnf	2.52864e-106	1.03574	0.441	0.125	4.48024e-102	3.528
Ccnb2	3.07476e-35	0.381323	0.134	0.038	5.44786e-31	3.52631
Shc3	9.34746e-35	0.365677	0.123	0.035	1.65618e-30	3.51428
Knstrn	1.81265e-96	0.94425	0.39	0.111	3.21165e-92	3.51351
Prr11	2.23812e-92	0.863317	0.365	0.104	3.9655e-88	3.50961
Kifc1	7.44023e-60	0.679271	0.26	0.075	1.31826e-55	3.46666
Sgo2a	2.89287e-106	0.989992	0.419	0.121	5.12559e-102	3.46281
Sowaha	2.55219e-17	0.330817	0.1	0.029	4.52197e-13	3.44826
Spc25	3.19681e-58	0.667929	0.254	0.074	5.66411e-54	3.43243
Kif20a	9.47744e-48	0.517615	0.192	0.056	1.67921e-43	3.42857
Kif18b	2.19204e-103	0.958179	0.423	0.124	3.88385e-99	3.41129
Bub1b	1.71385e-123	1.03475	0.467	0.137	3.03659e-119	3.40876
Plce1	3.06729e-20	0.394191	0.109	0.032	5.43462e-16	3.40624
Itga9	7.50391e-106	1.17196	0.418	0.123	1.32954e-101	3.39837
Cdk1	6.52263e-85	0.919846	0.393	0.116	1.15568e-80	3.38793
Kif23	4.59852e-175	1.26158	0.582	0.173	8.14766e-171	3.36416
Jag1	1.22933e-70	0.804692	0.335	0.1	2.17813e-66	3.35
Ect2	1.39581e-194	1.37701	0.641	0.192	2.4731e-190	3.33854
Kif22	9.42144e-92	0.846727	0.365	0.11	1.66929e-87	3.31818
Adamts12	4.35557e-98	1.12064	0.45	0.136	7.71721e-94	3.30882
Aurkb	3.12631e-69	0.702944	0.287	0.087	5.53919e-65	3.29885
Megf10	2.6305e-22	0.322972	0.112	0.034	4.66072e-18	3.29411
Cdca2	2.9168e-182	1.30507	0.644	0.196	5.16799e-178	3.28571
Kif18a	2.95347e-159	1.23234	0.58	0.177	5.23297e-155	3.27683
Bora	6.86232e-119	1.07897	0.469	0.144	1.21587e-114	3.25694
Fbln2	2.3684e-20	0.336952	0.104	0.032	4.19634e-16	3.24999
Espl1	1.10711e-71	0.788616	0.347	0.107	1.96158e-67	3.24299
Aspm	1.07446e-292	1.77064	0.819	0.253	1.90373e-288	3.23715
Ska3	1.05353e-34	0.505416	0.194	0.06	1.86664e-30	3.23333
Anln	2.6718e-160	1.22979	0.602	0.187	4.7339e-156	3.21925
Arhgap11a	2.30332e-102	0.968057	0.437	0.136	4.08102e-98	3.21323
Iqgap3	2.73515e-92	0.868359	0.363	0.113	4.84613e-88	3.21239
Cep89	6.20057e-67	0.878328	0.335	0.105	1.09862e-62	3.19047
Sgo1	2.28753e-59	0.715979	0.293	0.092	4.05305e-55	3.18478
Cdca8	3.28859e-60	0.645836	0.261	0.082	5.82672e-56	3.18292
Nusap1	1.4875e-98	0.958508	0.444	0.14	2.63555e-94	3.17143
Tpx2	4.27941e-195	1.27045	0.658	0.208	7.58225e-191	3.16346
Ccna2	8.57844e-64	0.698215	0.291	0.092	1.51993e-59	3.16304
H2afx	2.89613e-21	0.331155	0.12	0.038	5.13136e-17	3.15789
Ckap2l	3.60416e-103	0.956272	0.442	0.14	6.38585e-99	3.15714
Cep72	5.4679e-16	0.293268	0.11	0.035	9.68803e-12	3.14285
Ckap2	5.59164e-86	0.938405	0.438	0.14	9.90727e-82	3.12857
Creb5	1.73136e-87	1.19039	0.419	0.134	3.06762e-83	3.12686
Tacc3	9.29732e-112	1.00356	0.456	0.146	1.6473e-107	3.12329
Plekhh2	1.25997e-31	0.475968	0.178	0.057	2.23242e-27	3.1228
Bub1	7.98517e-120	0.97787	0.477	0.153	1.41481e-115	3.11765
Ncapg	2.47251e-142	1.04918	0.506	0.163	4.3808e-138	3.10429
Kif4	3.001e-176	1.2649	0.655	0.211	5.31718e-172	3.10426
Birc5	7.63211e-40	0.483809	0.186	0.06	1.35226e-35	3.09999
Sntb1	1.37737e-21	0.383274	0.13	0.042	2.44043e-17	3.09523
Csgalnact1	9.89215e-67	0.89351	0.342	0.111	1.75269e-62	3.08108
Cdc25b	8.7302e-27	0.454781	0.186	0.061	1.54682e-22	3.04918
Ttk	6.00102e-104	0.9122	0.429	0.141	1.06326e-99	3.04255
Rtkn2	2.18657e-86	0.862065	0.371	0.122	3.87416e-82	3.04098
Ndc80	1.34756e-80	0.867805	0.392	0.129	2.38761e-76	3.03876
Miip	6.16965e-27	0.368043	0.151	0.05	1.09314e-22	3.01999
Vldlr	2.7134e-37	0.499524	0.181	0.06	4.8076e-33	3.01666
Neurl1b	1.3979e-40	0.510744	0.202	0.067	2.4768e-36	3.01492
Pde1a	1.00757e-53	0.748725	0.271	0.09	1.78521e-49	3.01111
Spag5	5.93569e-82	0.846979	0.385	0.128	1.05168e-77	3.00781
Incenp	2.05952e-162	1.18597	0.617	0.206	3.64906e-158	2.99514
Dusp6	6.80953e-28	0.322024	0.131	0.044	1.20651e-23	2.97727
Kirrel3	4.31903e-66	0.870888	0.353	0.119	7.65247e-62	2.96638
Hyls1	1.55141e-20	0.364728	0.145	0.049	2.74879e-16	2.95918
Kif20b	8.89745e-216	1.38328	0.723	0.245	1.57645e-211	2.95102
Cenpe	2.17766e-276	1.64827	0.824	0.281	3.85838e-272	2.93238
Cacng3	4.7745e-33	0.55426	0.173	0.059	8.45946e-29	2.9322
Nde1	7.93879e-43	0.626592	0.265	0.091	1.4066e-38	2.91208
Lama5	1.64876e-141	1.31575	0.582	0.2	2.92128e-137	2.91
Gen1	2.17507e-44	0.505813	0.209	0.072	3.85379e-40	2.90277
Cenpf	1.10156e-232	1.52306	0.774	0.267	1.95174e-228	2.89888
Mamdc2	1.25544e-96	1.08898	0.5	0.174	2.22438e-92	2.87356
Nuf2	1.38978e-57	0.71294	0.332	0.116	2.46241e-53	2.86207
Lrfn2	1.30574e-59	0.803276	0.29	0.102	2.31352e-55	2.84313
Uaca	8.15838e-38	0.546063	0.224	0.079	1.4455e-33	2.83544
Kif11	1.5334e-247	1.37426	0.796	0.282	2.71687e-243	2.82269
Hist1h1c	8.64784e-24	0.358342	0.127	0.045	1.53222e-19	2.82222
Etv1	2.26816e-43	0.63558	0.279	0.099	4.01872e-39	2.81818
Efcab11	2.58508e-158	1.19915	0.611	0.217	4.58024e-154	2.81567
Lsp1	5.53744e-19	0.350736	0.118	0.042	9.81124e-15	2.80952
Mad2l1	7.81552e-29	0.361312	0.146	0.052	1.38475e-24	2.80769
Dbf4	2.06061e-68	0.750964	0.347	0.124	3.65099e-64	2.79838
Cyp39a1	4.68374e-50	0.605783	0.265	0.095	8.29865e-46	2.78947
Foxo1	5.92837e-40	0.554566	0.223	0.08	1.05039e-35	2.7875
Knl1	1.18946e-236	1.40859	0.797	0.287	2.10748e-232	2.777
Net1	2.09638e-38	0.480664	0.191	0.069	3.71436e-34	2.76811
Itgbl1	1.25562e-17	0.443973	0.151	0.055	2.22471e-13	2.74545
Chek2	1.53266e-39	0.48607	0.211	0.077	2.71556e-35	2.74026
Col28a1	2.61316e-35	0.549886	0.208	0.076	4.63e-31	2.73684
Calcrl	1.93446e-47	0.65221	0.278	0.102	3.42748e-43	2.72549
Rhoj	1.3687e-26	0.475999	0.174	0.064	2.42507e-22	2.71875
Melk	2.01265e-57	0.648692	0.303	0.112	3.56601e-53	2.70535
Crnde	1.69916e-28	0.405529	0.165	0.061	3.01058e-24	2.70491
Cit	5.59694e-167	1.21631	0.696	0.258	9.91665e-163	2.69767
Shcbp1	9.01595e-45	0.601996	0.267	0.099	1.59745e-40	2.69697
Lockd	4.81667e-92	0.876716	0.446	0.166	8.53418e-88	2.68675
Ccdc18	3.03368e-69	0.877383	0.419	0.156	5.37508e-65	2.6859
Foxm1	3.55474e-54	0.651588	0.311	0.116	6.29828e-50	2.68103
Rexo5	4.28123e-54	0.576994	0.265	0.099	7.58548e-50	2.67676
Trim59	1.61521e-27	0.436096	0.2	0.075	2.86183e-23	2.66666
Hhip	9.27841e-179	1.38546	0.693	0.26	1.64395e-174	2.66538
Yap1	2.73178e-14	0.253963	0.103	0.039	4.84018e-10	2.64102
Eldr	6.93914e-21	0.32669	0.129	0.049	1.22948e-16	2.63265
Col4a1	3.43338e-68	0.842638	0.408	0.155	6.08326e-64	2.63226
Rreb1	2.92215e-29	0.421603	0.191	0.073	5.17747e-25	2.61643
Ddx11	2.07273e-45	0.60225	0.282	0.108	3.67247e-41	2.61111
Hmgb2	3.32232e-61	0.718781	0.372	0.143	5.88649e-57	2.6014
Acer3	1.35028e-68	0.860368	0.398	0.153	2.39243e-64	2.60131
Zfp36l1	4.3085e-13	0.311182	0.143	0.055	7.63381e-09	2.6
Mastl	1.2015e-46	0.653969	0.309	0.119	2.12882e-42	2.59664
Uevld	1.10105e-19	0.351218	0.153	0.059	1.95084e-15	2.59322
Pcdh18	4.15712e-30	0.392497	0.184	0.071	7.36559e-26	2.59155
Ncaph	2.02655e-48	0.626944	0.318	0.123	3.59064e-44	2.58536
Arl6ip1	3.1465e-97	0.992924	0.506	0.196	5.57497e-93	2.58163
Neil3	1.65662e-103	0.952364	0.521	0.202	2.9352e-99	2.57921
Slc25a13	4.65528e-19	0.361448	0.152	0.059	8.24822e-15	2.57627
Stil	5.62927e-52	0.666069	0.337	0.131	9.97395e-48	2.57252
Nsl1	7.98515e-17	0.304416	0.131	0.051	1.41481e-12	2.56862
Sparcl1	2.09042e-39	0.557765	0.236	0.092	3.70381e-35	2.56521
Racgap1	1.15782e-105	0.900463	0.518	0.202	2.05143e-101	2.56436
Hist1h1d	8.37091e-20	0.372817	0.141	0.055	1.48316e-15	2.56363
Mdfic	4.14535e-22	0.389584	0.164	0.064	7.34474e-18	2.5625
Kank1	8.64064e-64	0.827063	0.392	0.153	1.53095e-59	2.56209
Cenpn	5.48878e-33	0.441802	0.187	0.073	9.72501e-29	2.56164
Actn1	1.80079e-28	0.435443	0.187	0.073	3.19064e-24	2.56164
Kif15	6.50429e-211	1.25076	0.781	0.305	1.15243e-206	2.56065
Apobec1	2.11679e-21	0.342119	0.148	0.058	3.75054e-17	2.55172
Prom1	1.71312e-40	0.529577	0.26	0.102	3.03531e-36	2.54902
Fzr1	6.06019e-37	0.430455	0.191	0.075	1.07374e-32	2.54666
Bmpr1b	1.48052e-65	0.724648	0.341	0.134	2.62319e-61	2.54477
Cenpi	2.88644e-52	0.571971	0.289	0.114	5.11419e-48	2.53509
Fbln1	7.85277e-23	0.36378	0.159	0.063	1.39135e-18	2.52381
Rgma	3.9786e-90	0.984977	0.557	0.221	7.04928e-86	2.52036
Slc9a9	2.14382e-31	0.473331	0.189	0.075	3.79843e-27	2.52
Palld	1.94001e-55	0.708608	0.339	0.135	3.4373e-51	2.51111
Lrp8	1.07938e-54	0.71091	0.331	0.132	1.91244e-50	2.50757
Arhgap26	6.49195e-55	0.756913	0.379	0.152	1.15024e-50	2.49342
Alk	5.87812e-21	0.533703	0.161	0.065	1.04148e-16	2.47692
Notch2	1.41548e-82	0.824537	0.453	0.183	2.50795e-78	2.47541
Eri2	1.25559e-27	0.420929	0.193	0.078	2.22465e-23	2.47436
Sorcs2	4.19127e-144	1.24991	0.676	0.274	7.42608e-140	2.46715
Slc6a11	6.00769e-24	0.422244	0.175	0.071	1.06444e-19	2.46479
Gpsm2	6.95275e-30	0.485837	0.234	0.095	1.23189e-25	2.46316
Arhgap28	2.91946e-21	0.399871	0.172	0.07	5.1727e-17	2.45714
Hist1h1b	4.52265e-53	0.643972	0.304	0.124	8.01322e-49	2.45161
Top2a	2.93284e-299	1.46354	0.913	0.373	5.19641e-295	2.44772
Sept8	8.02251e-50	0.701293	0.347	0.142	1.42143e-45	2.44366
Fbxo5	3.34412e-21	0.376894	0.183	0.075	5.92511e-17	2.44
Smad3	1.36878e-97	0.933169	0.548	0.225	2.42521e-93	2.43555
Col4a2	4.65437e-60	0.817691	0.387	0.159	8.24661e-56	2.43396
Col4a5	1.03164e-17	0.28495	0.124	0.051	1.82785e-13	2.43137
Nemp1	1.94966e-26	0.392015	0.177	0.073	3.45441e-22	2.42465
Amotl2	1.07351e-26	0.425998	0.201	0.083	1.90205e-22	2.42168
Col5a2	2.3069e-21	0.373502	0.179	0.074	4.08737e-17	2.41892
Klf6	1.39842e-24	0.379488	0.171	0.071	2.47772e-20	2.40845
Ccdc77	4.12899e-28	0.394509	0.195	0.081	7.31574e-24	2.4074
Hist1h2be	1.36392e-21	0.253649	0.115	0.048	2.4166e-17	2.39583
Ston2	4.51057e-27	0.406245	0.182	0.076	7.99183e-23	2.39473
Iqsec1	1.21693e-17	0.382257	0.167	0.07	2.15615e-13	2.38571
Ticrr	2.01333e-40	0.604563	0.305	0.128	3.56721e-36	2.38281
Bub3	7.46326e-34	0.524233	0.257	0.108	1.32234e-29	2.37963
Vim	4.03889e-22	0.318864	0.159	0.067	7.1561e-18	2.37313
Angpt1	5.41254e-37	0.652352	0.322	0.136	9.58995e-33	2.36765
Tcf7l1	2.01248e-32	0.485	0.243	0.103	3.5657e-28	2.35922
Esco2	3.22994e-41	0.535055	0.283	0.12	5.72281e-37	2.35833
Gm13791	1.28983e-33	0.446091	0.191	0.081	2.28532e-29	2.35802
Tenm4	1.53605e-19	0.330028	0.165	0.07	2.72157e-15	2.35714
Mns1	2.45666e-33	0.459825	0.226	0.096	4.35272e-29	2.35416
Pbk	1.95856e-19	0.345895	0.153	0.065	3.47017e-15	2.35384
Plk4	4.03438e-49	0.579556	0.314	0.134	7.14812e-45	2.34328
E2f8	4.7692e-24	0.398958	0.199	0.085	8.45007e-20	2.34117
Trip13	6.22261e-26	0.302885	0.159	0.068	1.10252e-21	2.33823
Akna	4.424e-43	0.591506	0.306	0.131	7.83845e-39	2.33588
Kctd9	7.2455e-16	0.355593	0.161	0.069	1.28376e-11	2.33333
Rangap1	2.77495e-64	0.736106	0.422	0.181	4.91665e-60	2.33149
Cenpq	3.9209e-13	0.297563	0.142	0.061	6.94706e-09	2.32787
Ngfr	3.93505e-32	0.425903	0.216	0.093	6.97213e-28	2.32258
Adcy2	1.82023e-53	0.88398	0.38	0.164	3.22509e-49	2.31707
Rhoq	7.03707e-32	0.523856	0.284	0.123	1.24683e-27	2.30894
Wscd1	8.02057e-23	0.33994	0.175	0.076	1.42108e-18	2.30263
Zwilch	2.39874e-35	0.480635	0.241	0.105	4.25008e-31	2.29524
Fut10	3.38998e-27	0.425496	0.211	0.092	6.00637e-23	2.29348
Dusp10	6.27491e-41	0.600128	0.307	0.134	1.11179e-36	2.29104
Kif24	2.19129e-56	0.659023	0.403	0.176	3.88252e-52	2.28977
Wee1	1.47454e-33	0.496307	0.288	0.126	2.61259e-29	2.28571
Phgdh	9.08367e-13	0.275147	0.111	0.049	1.60945e-08	2.2653
Mcc	3.22405e-18	0.512594	0.224	0.099	5.71237e-14	2.26262
Trib2	1.15444e-14	0.299533	0.138	0.061	2.04544e-10	2.26229
Ttf2	8.61029e-26	0.408114	0.199	0.088	1.52557e-21	2.26136
Terf1	1.50115e-63	0.726399	0.426	0.189	2.65973e-59	2.25397
Antxr1	1.67036e-21	0.354833	0.189	0.084	2.95954e-17	2.25
Fat3	2.42947e-203	1.31853	0.82	0.365	4.30454e-199	2.24657
Plxna2	3.96353e-94	0.815929	0.603	0.269	7.02259e-90	2.24163
Lama2	2.5665e-64	0.964884	0.497	0.222	4.54733e-60	2.23874
Ttc23	5.24812e-22	0.383177	0.223	0.1	9.29861e-18	2.23
Fancd2	2.89542e-25	0.464468	0.243	0.109	5.13011e-21	2.22936
Pdlim3	4.66691e-155	1.18899	0.774	0.348	8.26883e-151	2.22414
Adamts1	2.86431e-37	0.581588	0.324	0.146	5.07498e-33	2.21918
Adamts20	3.21753e-94	0.812784	0.519	0.234	5.70081e-90	2.21795
Sox6	6.97316e-15	0.378646	0.153	0.069	1.23551e-10	2.21739
Gm12610	1.67254e-15	0.296545	0.146	0.066	2.9634e-11	2.21212
Hist1h1e	2.62794e-39	0.62275	0.302	0.137	4.65618e-35	2.20438
Tbc1d31	1.57209e-38	0.53926	0.297	0.135	2.78543e-34	2.2
Sema4d	1.10957e-16	0.410793	0.211	0.096	1.96594e-12	2.19791
Diaph3	8.48458e-217	1.25401	0.872	0.397	1.5033e-212	2.19647
Samd4	1.22425e-56	0.69358	0.368	0.168	2.16913e-52	2.19047
Adamts14	3.43537e-89	0.848347	0.552	0.254	6.08679e-85	2.17323
Laptm4b	4.82098e-20	0.293282	0.178	0.082	8.54182e-16	2.17073
Pcx	1.3102e-58	0.671574	0.414	0.191	2.32141e-54	2.16754
Myo1e	4.48128e-45	0.605633	0.39	0.18	7.93993e-41	2.16667
Gfra2	5.61296e-20	0.349845	0.156	0.072	9.94505e-16	2.16666
Spats2l	1.89321e-23	0.414912	0.249	0.115	3.35439e-19	2.16522
Cenpp	3.49076e-153	1.01478	0.73	0.338	6.18492e-149	2.15976
Fbxl7	2.71429e-33	0.550145	0.306	0.142	4.80918e-29	2.15493
Cntrl	1.62207e-107	1.00628	0.617	0.287	2.87398e-103	2.14983
Lmnb2	1.88448e-21	0.36255	0.176	0.082	3.33892e-17	2.14634
Cklf	8.9241e-51	0.610121	0.373	0.174	1.58117e-46	2.14368
Fstl1	4.21332e-27	0.506079	0.315	0.147	7.46515e-23	2.14286
Lmo4	3.2647e-26	0.434162	0.225	0.105	5.7844e-22	2.14286
Ube2s	2.7245e-20	0.336716	0.165	0.077	4.82727e-16	2.14285
Sox9	1.33772e-14	0.280317	0.15	0.07	2.37017e-10	2.14285
G2e3	8.75391e-126	1.08724	0.699	0.327	1.55102e-121	2.13761
Gm48530	1.00302e-28	0.545475	0.309	0.145	1.77716e-24	2.13103
Ldlr	8.07287e-25	0.357339	0.179	0.084	1.43035e-20	2.13095
Cep112	2.49145e-68	0.784299	0.475	0.223	4.41436e-64	2.13004
Mast4	5.46138e-22	0.366959	0.208	0.098	9.67647e-18	2.12245
Pdgfa	8.24419e-18	0.324666	0.169	0.08	1.4607e-13	2.1125
Katnal2	8.69581e-18	0.397573	0.202	0.096	1.54072e-13	2.10416
Ska2	2.89874e-42	0.549288	0.34	0.162	5.13599e-38	2.09876
Bcar3	3.18379e-38	0.562924	0.333	0.159	5.64104e-34	2.09434
Ccdc61	3.69414e-18	0.295554	0.159	0.076	6.54527e-14	2.0921
Traip	6.06491e-11	0.256411	0.115	0.055	1.07458e-06	2.09091
Alg8	4.43068e-15	0.306291	0.167	0.08	7.85028e-11	2.0875
Sgcd	4.63112e-200	1.53948	0.814	0.39	8.20543e-196	2.08718
Ano3	1.13634e-17	0.333152	0.169	0.081	2.01337e-13	2.08642
Smc4	1.19348e-176	1.15782	0.831	0.399	2.1146e-172	2.08271
Lap3	3.842e-15	0.344755	0.189	0.091	6.80725e-11	2.07692
Pls3	1.17276e-16	0.287671	0.162	0.078	2.0779e-12	2.07692
Tcf7l2	3.75538e-42	0.54783	0.373	0.18	6.65378e-38	2.07222
Spsb4	6.01476e-14	0.273864	0.155	0.075	1.0657e-09	2.06666
Sh3rf1	4.7284e-24	0.379453	0.219	0.106	8.37777e-20	2.06604
Loxl1	8.33542e-18	0.305573	0.183	0.089	1.47687e-13	2.05618
Jade1	5.70624e-16	0.295342	0.156	0.076	1.01103e-11	2.05263
Grb10	6.37252e-45	0.686296	0.392	0.191	1.12908e-40	2.05235
Gnai2	2.86472e-39	0.480636	0.315	0.154	5.07571e-35	2.04545
Fn1	5.75978e-19	0.277026	0.163	0.08	1.02052e-14	2.0375
Ncapd2	1.37137e-88	0.818606	0.609	0.3	2.4298e-84	2.03
Bcl2	3.71324e-47	0.57655	0.359	0.177	6.57912e-43	2.02825
Prkcq	2.50069e-25	0.427071	0.257	0.127	4.43072e-21	2.02362
Pax3	1.15037e-12	0.272103	0.125	0.062	2.03823e-08	2.01613
Galnt18	4.45211e-24	0.474424	0.266	0.132	7.88825e-20	2.01515
Wls	3.32385e-19	0.263691	0.149	0.074	5.88919e-15	2.01351
Stk17b	2.12256e-22	0.328218	0.201	0.1	3.76075e-18	2.01
Ndc1	4.99414e-33	0.429125	0.275	0.137	8.84862e-29	2.0073
Mdc1	4.68359e-39	0.541005	0.359	0.179	8.29838e-35	2.00559
Mki67	0	1.58437	0.978	0.488	0	2.0041
Polq	1.38231e-53	0.581237	0.43	0.215	2.44918e-49	2
Mybl1	9.84129e-17	0.307097	0.178	0.089	1.74368e-12	2
Pqlc1	1.14456e-53	0.667988	0.457	0.229	2.02794e-49	1.99563
Cep70	2.07569e-24	0.409895	0.233	0.117	3.6777e-20	1.99145
Papd7	4.31304e-30	0.466085	0.304	0.153	7.64185e-26	1.98693
Eya1	1.93014e-09	0.258642	0.143	0.072	3.41981e-05	1.98611
Mettl15	1.35319e-38	0.578283	0.409	0.206	2.39758e-34	1.98544
Ckap5	1.71514e-167	1.13031	0.814	0.411	3.03889e-163	1.98053
Mum1l1	7.46971e-28	0.295234	0.184	0.093	1.32348e-23	1.97849
Fanci	1.87487e-20	0.324012	0.18	0.091	3.32189e-16	1.97802
Abtb2	1.05962e-55	0.707625	0.468	0.237	1.87744e-51	1.97468
Gpr153	1.00829e-54	0.600075	0.473	0.24	1.7865e-50	1.97083
Syt13	5.13446e-36	0.511515	0.337	0.171	9.09724e-32	1.97076
E2f5	2.69717e-17	0.336893	0.212	0.108	4.77884e-13	1.96296
Rad21	4.66339e-112	0.921572	0.686	0.35	8.26259e-108	1.96
Slc7a5	1.37854e-18	0.40522	0.213	0.109	2.44249e-14	1.95413
Hk2	5.38224e-27	0.444447	0.336	0.172	9.53625e-23	1.95349
Cep57l1	3.31395e-20	0.424945	0.252	0.129	5.87166e-16	1.95349
Prex1	2.26909e-37	0.629745	0.351	0.18	4.02037e-33	1.95
Cplx2	1.30989e-71	0.820708	0.56	0.288	2.32086e-67	1.94444
Ift80	1.04802e-46	0.601881	0.419	0.216	1.85689e-42	1.93981
Srgap1	4.35856e-26	0.571886	0.304	0.157	7.72249e-22	1.9363
Ccdc34	6.11773e-34	0.538615	0.379	0.196	1.08394e-29	1.93367
Pou6f2	4.48163e-19	0.408592	0.199	0.103	7.94056e-15	1.93204
Igf2	5.84262e-11	0.307716	0.139	0.072	1.03519e-06	1.93055
Fndc3b	5.65207e-26	0.486847	0.354	0.184	1.00143e-21	1.92391
Thsd4	7.55923e-51	0.839406	0.434	0.226	1.33934e-46	1.92035
Mindy4	1.05696e-14	0.263907	0.19	0.099	1.87272e-10	1.91919
Kitl	6.6551e-31	0.491833	0.349	0.182	1.17915e-26	1.91758
Mef2c	1.72568e-25	0.428028	0.297	0.155	3.05757e-21	1.91613
Smc2	3.11691e-146	1.01933	0.821	0.43	5.52254e-142	1.9093
Vegfc	3.34229e-15	0.253022	0.124	0.065	5.92187e-11	1.90769
Gli1	7.42628e-51	0.625142	0.492	0.258	1.31579e-46	1.90698
Dock6	7.4395e-14	0.286885	0.162	0.085	1.31813e-09	1.90588
Ntng1	1.82385e-16	0.292421	0.156	0.082	3.23149e-12	1.90244
Efs	1.8473e-19	0.293734	0.194	0.102	3.27304e-15	1.90196
Hmgn2	7.51961e-19	0.287985	0.19	0.1	1.33232e-14	1.9
Cars	9.33197e-16	0.357969	0.203	0.107	1.65344e-11	1.89719
Cntrob	1.34651e-15	0.270183	0.159	0.084	2.38574e-11	1.89285
Tmtc1	1.86656e-56	0.671075	0.541	0.286	3.30717e-52	1.89161
Cep192	1.7639e-63	0.689504	0.546	0.289	3.12528e-59	1.88927
Tuba1b	3.46489e-17	0.252348	0.151	0.08	6.1391e-13	1.8875
Kremen1	1.25332e-13	0.258358	0.149	0.079	2.22063e-09	1.88607
Pkp4	3.40292e-131	0.961642	0.769	0.408	6.0293e-127	1.8848
Cenpc1	2.44298e-71	0.723675	0.552	0.293	4.32847e-67	1.88396
Psat1	1.08307e-27	0.369616	0.241	0.128	1.91899e-23	1.88281
Odf2	5.68794e-45	0.608544	0.448	0.238	1.00779e-40	1.88235
Rbm15	4.72554e-16	0.342831	0.229	0.122	8.37272e-12	1.87705
Sash1	2.28251e-21	0.370089	0.257	0.137	4.04416e-17	1.87591
Fat1	7.749e-38	0.58643	0.45	0.24	1.37297e-33	1.875
Ldlrad3	1.08547e-18	0.36715	0.238	0.127	1.92324e-14	1.87401
Cep128	1.28105e-92	0.76679	0.678	0.363	2.26977e-88	1.86777
E2f7	3.27869e-34	0.480758	0.347	0.186	5.80918e-30	1.86559
Dab1	1.42106e-20	0.394168	0.214	0.115	2.51784e-16	1.86087
Arid5b	3.76673e-24	0.348125	0.266	0.143	6.67388e-20	1.86014
Hirip3	1.2232e-23	0.346394	0.238	0.128	2.16727e-19	1.85937
Rad54b	2.47724e-32	0.419507	0.299	0.161	4.38918e-28	1.85714
Cep85	3.52282e-19	0.336502	0.208	0.112	6.24174e-15	1.85714
Polh	6.58873e-20	0.301407	0.18	0.097	1.16739e-15	1.85567
Fgfr1	4.43244e-28	0.41036	0.304	0.164	7.8534e-24	1.85366
Fosb	1.79187e-51	0.660447	0.489	0.264	3.17483e-47	1.85227
Ncaph2	3.1246e-23	0.341417	0.264	0.143	5.53617e-19	1.84615
Phldb2	1.92598e-21	0.40006	0.275	0.149	3.41245e-17	1.84564
Gli3	4.58502e-26	0.433486	0.306	0.166	8.12373e-22	1.84337
Sned1	1.01553e-08	0.376687	0.138	0.075	0.000179932	1.84
Sorl1	9.71987e-12	0.283611	0.171	0.093	1.72217e-07	1.83871
Suclg2	2.55073e-11	0.268679	0.182	0.099	4.51938e-07	1.83838
Anxa6	7.27513e-21	0.362615	0.237	0.13	1.28901e-16	1.82308
Lin9	2.90562e-15	0.368745	0.276	0.152	5.14817e-11	1.81579
Whrn	1.53923e-54	0.622714	0.544	0.301	2.7272e-50	1.80731
Atl2	2.34238e-23	0.417611	0.309	0.171	4.15022e-19	1.80702
Usp1	2.24799e-19	0.34271	0.251	0.139	3.98299e-15	1.80575
Airn	1.06807e-54	0.760051	0.59	0.327	1.89241e-50	1.80428
Rbms3	1.57303e-80	0.735634	0.626	0.347	2.78709e-76	1.80403
Hpca	7.33314e-30	0.585661	0.377	0.209	1.29929e-25	1.80383
Cep135	9.13291e-30	0.424425	0.367	0.204	1.61817e-25	1.79902
Ptprm	2.77687e-23	0.412254	0.322	0.179	4.92006e-19	1.79888
Tdp1	1.99972e-29	0.426935	0.329	0.183	3.5431e-25	1.79781
Ncapg2	2.48307e-31	0.451349	0.372	0.207	4.3995e-27	1.7971
Nedd1	1.14699e-21	0.33621	0.248	0.138	2.03224e-17	1.7971
Cerk	5.70388e-30	0.504032	0.418	0.233	1.01061e-25	1.79399
Clstn2	1.14086e-18	0.394268	0.213	0.119	2.02137e-14	1.78991
Msn	1.53979e-14	0.272067	0.195	0.109	2.7282e-10	1.78899
Wwc1	4.55204e-18	0.349317	0.32	0.179	8.0653e-14	1.78771
Itpr1	9.47801e-48	0.540424	0.468	0.262	1.67931e-43	1.78626
Cenpk	3.21746e-18	0.291462	0.215	0.121	5.7007e-14	1.77686
Vsx2	8.12992e-21	0.404595	0.259	0.146	1.44046e-16	1.77397
Tmpo	3.50756e-95	0.772505	0.727	0.41	6.21469e-91	1.77317
Lmnb1	7.18469e-90	0.709412	0.656	0.37	1.27298e-85	1.77297
Rbl1	5.69934e-29	0.394955	0.317	0.179	1.00981e-24	1.77095
Rad51b	9.89837e-63	0.653482	0.656	0.371	1.75379e-58	1.76819
Pxdn	6.43706e-18	0.324156	0.235	0.133	1.14052e-13	1.76692
Elmsan1	4.29665e-34	0.514706	0.431	0.244	7.6128e-30	1.76639
Cep152	3.12746e-28	0.42182	0.356	0.202	5.54124e-24	1.76238
Rad51ap1	5.33031e-15	0.261557	0.199	0.113	9.44424e-11	1.76106
Nucks1	2.09363e-65	0.683439	0.607	0.345	3.70949e-61	1.75942
Gm29478	7.39952e-15	0.328228	0.218	0.124	1.31105e-10	1.75806
Vcl	1.29222e-29	0.513106	0.381	0.217	2.28956e-25	1.75576
Plscr4	1.1213e-15	0.290036	0.23	0.131	1.98673e-11	1.75572
Igf2bp1	1.93285e-12	0.271146	0.193	0.11	3.42462e-08	1.75454
Stard13	3.50694e-11	0.299653	0.184	0.105	6.21359e-07	1.75238
Bard1	9.48489e-12	0.333124	0.254	0.145	1.68053e-07	1.75172
Sephs1	3.05811e-22	0.34779	0.28	0.16	5.41836e-18	1.75
Igf2bp3	6.33994e-20	0.374501	0.28	0.16	1.12331e-15	1.75
Il4i1	1.24587e-11	0.251344	0.18	0.103	2.20744e-07	1.74757
Nhs	2.18559e-63	0.69423	0.613	0.351	3.87243e-59	1.74644
Angptl2	8.20614e-20	0.372062	0.302	0.173	1.45396e-15	1.74566
Kntc1	1.56846e-27	0.388946	0.342	0.196	2.77901e-23	1.7449
Prkd1	1.62811e-57	0.656366	0.556	0.319	2.88469e-53	1.74295
Alg13	1.29933e-22	0.328483	0.27	0.155	2.30215e-18	1.74193
Stxbp6	1.05333e-63	0.674725	0.634	0.364	1.86628e-59	1.74176
Brd8	8.18609e-72	0.76657	0.694	0.399	1.45041e-67	1.73935
Ddr2	4.50833e-43	0.566162	0.513	0.295	7.98786e-39	1.73898
Anp32e	2.56019e-34	0.449493	0.398	0.229	4.53614e-30	1.73799
Pclaf	1.99182e-16	0.306855	0.253	0.146	3.5291e-12	1.73288
Gpc3	7.84743e-12	0.303134	0.187	0.108	1.39041e-07	1.73148
H2afv	1.81938e-20	0.366698	0.289	0.167	3.22358e-16	1.73054
Srf	8.57191e-19	0.300846	0.249	0.144	1.51877e-14	1.72917
Egr1	7.68701e-27	0.500665	0.349	0.202	1.36198e-22	1.72772
Map3k20	6.46366e-17	0.30029	0.26	0.151	1.14523e-12	1.72185
Spop	1.47542e-28	0.490897	0.439	0.255	2.61415e-24	1.72157
Ccnd1	5.85273e-40	0.580721	0.612	0.356	1.03699e-35	1.7191
Ccng2	4.88644e-12	0.26226	0.175	0.102	8.6578e-08	1.71568
Chsy1	5.29174e-23	0.457655	0.413	0.241	9.37591e-19	1.71369
Hectd2	1.23131e-29	0.544503	0.493	0.288	2.18163e-25	1.7118
Arhgap33	1.25567e-20	0.371826	0.299	0.175	2.2248e-16	1.70857
Elmo2	4.90189e-11	0.260308	0.181	0.106	8.68517e-07	1.70755
Ubash3b	1.62604e-48	0.852313	0.522	0.306	2.88102e-44	1.70588
Hdgf	2.05318e-13	0.318696	0.29	0.17	3.63783e-09	1.70588
Vgll4	1.46768e-30	0.41775	0.419	0.246	2.60044e-26	1.70325
Flnb	6.19379e-27	0.366758	0.311	0.183	1.09742e-22	1.69945
Cep57	6.33446e-19	0.311041	0.265	0.156	1.12234e-14	1.69872
Asxl1	6.95988e-66	0.716884	0.67	0.395	1.23315e-61	1.6962
Pdzrn4	1.63275e-55	0.537272	0.614	0.362	2.89291e-51	1.69613
Cep295	9.15241e-44	0.541534	0.522	0.31	1.62162e-39	1.68387
Mad1l1	2.56164e-41	0.525925	0.488	0.29	4.53872e-37	1.68276
Galnt2	8.0658e-51	0.533532	0.494	0.294	1.4291e-46	1.68027
Trpm3	1.26113e-23	0.37368	0.334	0.199	2.23447e-19	1.67839
Hjurp	2.44553e-113	0.853452	0.811	0.484	4.33298e-109	1.67562
Dusp16	2.85503e-31	0.434369	0.36	0.215	5.05854e-27	1.67442
Ablim2	1.12343e-14	0.28704	0.231	0.138	1.99049e-10	1.67391
Rftn2	9.31189e-35	0.487337	0.46	0.275	1.64988e-30	1.67273
St3gal4	4.13998e-19	0.350316	0.319	0.191	7.33521e-15	1.67016
Rad18	1.19256e-18	0.38126	0.355	0.213	2.11298e-14	1.66667
Zranb3	3.75655e-21	0.30284	0.293	0.176	6.65585e-17	1.66477
Brip1	7.9698e-14	0.327517	0.278	0.167	1.41209e-09	1.66467
Anp32b	5.51277e-28	0.378266	0.371	0.223	9.76753e-24	1.66368
Wdpcp	2.21477e-41	0.532828	0.519	0.312	3.92413e-37	1.66346
Fos	1.7958e-15	0.262398	0.211	0.127	3.18179e-11	1.66142
Cdc7	1.37619e-15	0.257692	0.201	0.121	2.43833e-11	1.66116
Serinc5	1.3737e-33	0.491939	0.488	0.294	2.43392e-29	1.65986
Mtmr12	3.50181e-16	0.287721	0.239	0.144	6.2045e-12	1.65972
Lin54	1.59124e-12	0.251084	0.219	0.132	2.81936e-08	1.65909
Gstcd	3.63968e-22	0.382294	0.357	0.216	6.44878e-18	1.65278
Tenm3	2.09633e-40	0.557655	0.561	0.34	3.71428e-36	1.65
Brca1	1.234e-21	0.33253	0.333	0.202	2.18641e-17	1.64851
Cdk5rap2	7.31593e-107	0.806225	0.778	0.472	1.29624e-102	1.6483
Nr3c2	8.77043e-43	0.536362	0.588	0.357	1.55394e-38	1.64706
Blm	4.66814e-28	0.398451	0.403	0.245	8.271e-24	1.6449
Cenpj	1.94893e-20	0.324191	0.296	0.18	3.45312e-16	1.64444
Tbata	6.31407e-23	0.427102	0.319	0.194	1.11873e-18	1.64433
Dgkb	2.45849e-20	0.400278	0.361	0.22	4.35595e-16	1.64091
Epb41l2	4.20232e-36	0.436325	0.502	0.306	7.44567e-32	1.64052
Sae1	1.95946e-26	0.423312	0.438	0.267	3.47178e-22	1.64045
Zc3h7a	4.51305e-37	0.523546	0.51	0.311	7.99622e-33	1.63987
Jun	1.57017e-39	0.488782	0.487	0.297	2.78202e-35	1.63973
Vrk1	1.00829e-19	0.293989	0.282	0.172	1.78649e-15	1.63953
Ptn	1.73093e-32	0.49848	0.477	0.291	3.06687e-28	1.63917
Pde4b	2.00418e-111	0.906969	0.809	0.494	3.55101e-107	1.63765
Mcph1	1.18313e-63	0.60786	0.622	0.38	2.09627e-59	1.63684
Cse1l	1.79562e-18	0.315715	0.314	0.192	3.18149e-14	1.63542
Epb41l4b	7.49909e-16	0.326686	0.314	0.192	1.32869e-11	1.63542
Rttn	6.38172e-33	0.387302	0.407	0.249	1.13071e-28	1.63454
Lpin2	2.35938e-36	0.490663	0.571	0.351	4.18034e-32	1.62678
B3glct	2.38133e-12	0.282102	0.252	0.155	4.21925e-08	1.62581
Ebf2	5.28839e-41	0.567283	0.552	0.34	9.36997e-37	1.62353
Mdga2	7.27474e-41	0.631428	0.508	0.313	1.28894e-36	1.623
Ptch2	1.72315e-84	0.781535	0.738	0.455	3.05308e-80	1.62198
Prdm11	2.39056e-14	0.280678	0.287	0.177	4.23559e-10	1.62147
Lrig3	3.1211e-84	0.781902	0.791	0.488	5.52997e-80	1.6209
Smco4	6.27972e-12	0.279933	0.264	0.163	1.11264e-07	1.61963
Lbr	1.99382e-26	0.39017	0.374	0.231	3.53266e-22	1.61905
Arhgap31	4.04551e-27	0.436918	0.459	0.284	7.16783e-23	1.6162
Cbfb	4.34731e-29	0.458267	0.491	0.304	7.70256e-25	1.61513
Tmem55a	1.26314e-17	0.272204	0.267	0.166	2.23804e-13	1.60843
Diaph2	4.19686e-53	0.612132	0.652	0.406	7.43599e-49	1.60591
Rrm1	2.17515e-17	0.285985	0.291	0.182	3.85393e-13	1.5989
Itgb8	1.37982e-15	0.31614	0.327	0.205	2.44477e-11	1.59512
Immp2l	3.17981e-15	0.344627	0.285	0.179	5.63398e-11	1.59218
Dpyd	2.07527e-14	0.282277	0.261	0.164	3.67697e-10	1.59146
Ror2	1.40683e-21	0.385833	0.429	0.27	2.49262e-17	1.58889
Hsp90b1	3.01805e-31	0.453544	0.538	0.339	5.34739e-27	1.58702
Brca2	7.48939e-23	0.316611	0.357	0.225	1.32697e-18	1.58667
Ncapd3	3.68454e-31	0.444951	0.517	0.326	6.52826e-27	1.58589
Pou3f2	2.896e-10	0.273728	0.306	0.193	5.13112e-06	1.58549
Ctnnb1	2.79095e-31	0.361521	0.412	0.26	4.945e-27	1.58461
Skp2	2.74754e-10	0.27209	0.226	0.143	4.86809e-06	1.58042
Mtr	2.90927e-14	0.281172	0.305	0.193	5.15464e-10	1.58031
Pcnt	1.69787e-28	0.422474	0.51	0.323	3.00829e-24	1.57895
Cacnb2	1.34958e-12	0.377111	0.273	0.173	2.39119e-08	1.57803
Spred1	5.49876e-33	0.430019	0.437	0.277	9.74271e-29	1.57762
Fam19a5	1.17587e-35	0.500583	0.544	0.346	2.0834e-31	1.57225
Klf13	9.30922e-16	0.344646	0.382	0.243	1.64941e-11	1.57202
Slc7a1	2.84702e-23	0.431567	0.363	0.231	5.04436e-19	1.57143
Nxn	2.12435e-26	0.399054	0.41	0.261	3.76392e-22	1.57088
Gpc6	4.15034e-106	0.712967	0.878	0.559	7.35356e-102	1.57066
Sipa1l1	1.95739e-14	0.282812	0.245	0.156	3.46811e-10	1.57051
Znrf2	3.65741e-20	0.320738	0.347	0.221	6.48019e-16	1.57014
Jpt1	8.33802e-12	0.265737	0.27	0.172	1.47733e-07	1.56977
Tacc1	1.81646e-16	0.277045	0.304	0.194	3.2184e-12	1.56701
Traf3	9.97792e-19	0.317418	0.349	0.223	1.76789e-14	1.56502
Srbd1	3.30282e-36	0.422855	0.46	0.294	5.85194e-32	1.56463
Cdk17	1.47493e-36	0.47414	0.503	0.322	2.61328e-32	1.56211
Ezr	1.41196e-17	0.301196	0.367	0.235	2.50172e-13	1.5617
Cdc27	3.31764e-28	0.418749	0.484	0.31	5.8782e-24	1.56129
Adgrv1	7.79638e-12	0.309231	0.176	0.113	1.38136e-07	1.55752
Wdr1	6.15375e-16	0.279165	0.274	0.176	1.09032e-11	1.55682
Cnn3	2.8088e-23	0.320873	0.344	0.221	4.97663e-19	1.55656
Clic4	5.75906e-18	0.324193	0.376	0.242	1.02039e-13	1.55372
H1f0	5.77829e-12	0.295799	0.304	0.196	1.0238e-07	1.55102
Mtbp	1.11973e-14	0.276071	0.319	0.206	1.98394e-10	1.54854
Cdyl	2.66017e-27	0.415492	0.48	0.31	4.7133e-23	1.54839
Gab2	4.40438e-13	0.34623	0.283	0.183	7.80368e-09	1.54645
Irs1	3.09117e-63	0.678044	0.784	0.507	5.47694e-59	1.54635
Rai14	4.91434e-24	0.419072	0.49	0.317	8.70722e-20	1.54574
Ccp110	1.40151e-17	0.310259	0.323	0.209	2.4832e-13	1.54545
Ahctf1	7.6793e-30	0.404469	0.491	0.318	1.36062e-25	1.54402
Slc1a3	2.00515e-30	0.442622	0.565	0.366	3.55273e-26	1.54372
Cdh13	1.62809e-42	0.515569	0.572	0.371	2.88464e-38	1.54178
Thada	2.7865e-25	0.451058	0.581	0.377	4.93712e-21	1.54111
Fam212b	1.93038e-15	0.315704	0.408	0.265	3.42025e-11	1.53962
Pcdh9	1.20684e-47	0.432256	0.696	0.453	2.13829e-43	1.53642
Mob3b	5.09014e-16	0.265945	0.342	0.223	9.0187e-12	1.53363
Atad2	6.5714e-23	0.323458	0.466	0.304	1.16432e-18	1.53289
Ralgps2	1.36258e-77	0.777128	0.756	0.494	2.41421e-73	1.53036
Nek7	2.05048e-18	0.335312	0.456	0.298	3.63304e-14	1.5302
Hmgb1	5.39995e-15	0.326579	0.431	0.282	9.56763e-11	1.52837
Tpk1	2.81244e-14	0.271279	0.284	0.186	4.98308e-10	1.52688
Pvt1	1.99624e-28	0.355624	0.505	0.331	3.53695e-24	1.52568
Nup205	4.31635e-18	0.320735	0.398	0.261	7.64772e-14	1.5249
Prkd3	2.94202e-18	0.346255	0.462	0.303	5.21268e-14	1.52475
Pard3b	6.34533e-71	0.579584	0.812	0.533	1.12426e-66	1.52345
Cntln	2.81986e-35	0.423552	0.528	0.347	4.99622e-31	1.52161
Cep83	2.68109e-36	0.41395	0.548	0.361	4.75035e-32	1.51801
Pcf11	1.8575e-22	0.329832	0.43	0.284	3.29111e-18	1.51408
Ano6	9.3218e-15	0.337611	0.442	0.292	1.65164e-10	1.5137
Kcnh5	2.50366e-14	0.364283	0.431	0.285	4.43599e-10	1.51228
Lnpk	6.22161e-20	0.317084	0.408	0.27	1.10235e-15	1.51111
Akap13	4.5181e-40	0.465724	0.636	0.421	8.00516e-36	1.51069
Xrcc4	2.68443e-16	0.266726	0.314	0.208	4.75628e-12	1.50961
Nr3c1	3.85368e-15	0.293948	0.359	0.238	6.82795e-11	1.5084
Eefsec	4.00846e-14	0.264091	0.298	0.198	7.10219e-10	1.50505
Zfp871	2.11853e-16	0.287621	0.373	0.248	3.75361e-12	1.50403
G3bp1	6.29259e-18	0.262917	0.386	0.257	1.11492e-13	1.50194
Phkb	1.33386e-23	0.328988	0.443	0.296	2.36334e-19	1.49662
Abr	3.27944e-15	0.267526	0.33	0.221	5.81052e-11	1.49321
Eif4e	3.00497e-13	0.262189	0.309	0.207	5.3242e-09	1.49275
Sipa1l2	6.39477e-31	0.523476	0.523	0.351	1.13302e-26	1.49003
Ctcf	4.12236e-20	0.333053	0.494	0.332	7.304e-16	1.48795
Sema3e	5.55935e-20	0.266705	0.345	0.232	9.85006e-16	1.48707
Antxr2	1.08516e-19	0.368439	0.509	0.343	1.92269e-15	1.48396
Nin	8.92159e-37	0.434328	0.616	0.416	1.58073e-32	1.48077
Topbp1	8.89439e-14	0.261665	0.361	0.244	1.57591e-09	1.47951
Gria3	2.31377e-22	0.37448	0.528	0.357	4.09953e-18	1.47899
Nop58	8.64877e-18	0.299813	0.439	0.297	1.53239e-13	1.47811
Stt3b	2.78723e-22	0.343669	0.487	0.33	4.93842e-18	1.47576
Suz12	1.96652e-20	0.328462	0.472	0.32	3.48427e-16	1.475
Cc2d2a	1.35014e-05	0.254919	0.274	0.186	0.239217	1.47312
Cmtm4	1.33387e-22	0.307461	0.425	0.289	2.36335e-18	1.47059
Phactr4	1.1964e-10	0.256167	0.358	0.244	2.11979e-06	1.46721
Ercc6l2	3.34175e-13	0.2555	0.362	0.247	5.92092e-09	1.46559
Zc3h12c	1.22168e-13	0.340462	0.47	0.321	2.16457e-09	1.46417
Ncald	8.67993e-52	0.615527	0.732	0.5	1.53791e-47	1.464
Bahcc1	2.05876e-55	0.652806	0.742	0.507	3.64771e-51	1.46351
Uhrf2	1.35307e-46	0.495156	0.706	0.484	2.39737e-42	1.45868
Prkce	1.47118e-36	0.39812	0.64	0.439	2.60664e-32	1.45786
Sh3bgrl	4.04141e-14	0.28594	0.338	0.232	7.16058e-10	1.4569
Asap1	1.49435e-67	0.678354	0.836	0.574	2.64768e-63	1.45645
Rgs20	1.82509e-29	0.380545	0.569	0.391	3.23369e-25	1.45524
Dek	4.905e-17	0.363613	0.502	0.345	8.69067e-13	1.45507
Dleu2	8.73196e-27	0.402025	0.666	0.458	1.54713e-22	1.45415
Nup210	4.98816e-21	0.314104	0.401	0.276	8.83802e-17	1.4529
Taf1d	3.16195e-21	0.347283	0.521	0.359	5.60234e-17	1.45125
Mpdz	1.24709e-24	0.328534	0.534	0.368	2.20959e-20	1.45109
Dock10	1.49176e-15	0.284536	0.338	0.233	2.64309e-11	1.45064
Ctnnd1	2.35424e-21	0.356236	0.512	0.353	4.17124e-17	1.45042
Nkd1	3.20593e-27	0.336169	0.567	0.391	5.68026e-23	1.45013
Btaf1	2.27474e-25	0.343285	0.481	0.333	4.03038e-21	1.44444
Nup155	2.51679e-16	0.259398	0.375	0.26	4.45925e-12	1.44231
Pam	4.84583e-16	0.283434	0.411	0.285	8.58584e-12	1.4421
Bbs9	1.49477e-16	0.269335	0.376	0.261	2.64844e-12	1.44061
Iars	8.36647e-14	0.304943	0.376	0.261	1.48237e-09	1.44061
Nup98	3.16882e-16	0.316868	0.498	0.346	5.61452e-12	1.43931
Gng12	1.20741e-17	0.293167	0.49	0.341	2.1393e-13	1.43695
Nrf1	2.60218e-22	0.344817	0.577	0.402	4.61055e-18	1.43532
Ilf3	4.06933e-21	0.342332	0.541	0.377	7.21003e-17	1.43501
Zdbf2	5.05167e-17	0.260029	0.35	0.244	8.95054e-13	1.43443
Lcorl	4.90136e-33	0.429621	0.66	0.461	8.68422e-29	1.43167
Numa1	1.38758e-27	0.37886	0.591	0.413	2.45852e-23	1.43099
Tpcn1	6.44388e-19	0.331827	0.568	0.397	1.14173e-14	1.43073
Pcdh7	7.27679e-19	0.373319	0.5	0.35	1.2893e-14	1.42857
Ttll4	1.66833e-15	0.262521	0.404	0.283	2.95595e-11	1.42756
Dlg1	1.13729e-18	0.332927	0.571	0.4	2.01505e-14	1.4275
Tle4	1.7055e-26	0.36349	0.578	0.405	3.0218e-22	1.42716
Tmem164	4.84727e-16	0.275099	0.455	0.319	8.58839e-12	1.42633
Wapl	3.17909e-18	0.293134	0.479	0.336	5.63272e-14	1.42559
Hnrnpul1	5.45999e-28	0.353558	0.546	0.383	9.67401e-24	1.42559
Rassf3	8.47816e-58	0.529375	0.781	0.548	1.50216e-53	1.42518
Cdk19	1.26657e-37	0.467464	0.67	0.471	2.24411e-33	1.42251
Brd7	5.08174e-11	0.254992	0.384	0.27	9.00383e-07	1.42222
Dock1	5.63749e-64	0.505008	0.884	0.624	9.9885e-60	1.41667
Ttll5	4.925e-25	0.357989	0.552	0.39	8.72612e-21	1.41538
Ipo11	4.84103e-22	0.288582	0.495	0.35	8.57733e-18	1.41429
Farp1	4.18657e-15	0.315795	0.565	0.4	7.41776e-11	1.4125
Lars	6.59977e-13	0.252638	0.313	0.222	1.16935e-08	1.40991
Smc6	2.01587e-19	0.283094	0.492	0.349	3.57172e-15	1.40974
Fancc	6.39855e-14	0.287282	0.469	0.333	1.13369e-09	1.40841
Gli2	1.00078e-38	0.378747	0.84	0.597	1.77319e-34	1.40703
Xpo1	2.85419e-48	0.428908	0.697	0.496	5.05705e-44	1.40524
Etv6	3.70186e-13	0.290298	0.517	0.368	6.55896e-09	1.40489
Eya4	1.17353e-14	0.283107	0.507	0.361	2.07927e-10	1.40443
Adamts6	1.31683e-35	0.449196	0.698	0.497	2.33316e-31	1.40443
Qk	5.79746e-61	0.600708	0.808	0.576	1.02719e-56	1.40278
Ezh2	1.06591e-38	0.462981	0.749	0.534	1.88859e-34	1.40262
Il1rapl1	3.81177e-34	0.427279	0.625	0.446	6.75369e-30	1.40134
Anapc1	8.76448e-17	0.268319	0.447	0.32	1.55289e-12	1.39687
Npas3	3.03127e-35	0.482984	0.618	0.444	5.37081e-31	1.39189
Hdac4	8.69763e-28	0.40246	0.698	0.502	1.54105e-23	1.39044
Tra2b	1.49436e-14	0.270438	0.535	0.385	2.64771e-10	1.38961
Tgfb2	1.03074e-20	0.267647	0.453	0.326	1.82626e-16	1.38957
Flrt2	7.11486e-16	0.266366	0.515	0.371	1.26061e-11	1.38814
Ppp2r5c	3.34455e-16	0.268929	0.514	0.371	5.92587e-12	1.38544
Mphosph9	2.99927e-27	0.375525	0.617	0.447	5.31411e-23	1.38031
Map2k6	7.20916e-14	0.256177	0.443	0.322	1.27732e-09	1.37578
Hcfc1	2.39876e-11	0.276146	0.493	0.359	4.25012e-07	1.37326
Dyrk1a	1.55288e-43	0.472118	0.756	0.552	2.75138e-39	1.36956
Mthfd1l	2.12535e-09	0.285429	0.392	0.287	3.7657e-05	1.36585
Fry	1.74995e-43	0.532109	0.786	0.576	3.10056e-39	1.36458
Hp1bp3	1.51482e-11	0.255873	0.48	0.352	2.68396e-07	1.36364
Rbmx	1.28231e-11	0.253572	0.45	0.33	2.27199e-07	1.36364
Smc1a	1.58251e-09	0.259901	0.534	0.392	2.8039e-05	1.36224
Cdh4	3.26681e-29	0.343824	0.749	0.552	5.78813e-25	1.35688
Gsg1l	8.65119e-154	0.821338	0.979	0.722	1.53282e-149	1.35596
Kcnq3	2.71879e-23	0.285883	0.522	0.385	4.81716e-19	1.35584
Cbx5	7.09399e-27	0.338794	0.732	0.54	1.25691e-22	1.35556
Frmd4b	5.13342e-215	1.09222	0.98	0.725	9.09539e-211	1.35172
Ssbp2	4.9044e-30	0.341795	0.748	0.554	8.68961e-26	1.35018
Prrc2a	5.19703e-27	0.34475	0.649	0.481	9.20809e-23	1.34927
Trps1	1.19638e-37	0.402554	0.773	0.574	2.11975e-33	1.34669
Tspan5	9.3365e-54	0.585552	0.8	0.595	1.65424e-49	1.34454
Nalcn	6.08422e-32	0.574419	0.715	0.535	1.078e-27	1.33645
Zfp704	3.94274e-102	0.719056	0.918	0.688	6.98574e-98	1.3343
Zfhx3	4.67066e-45	0.495039	0.824	0.618	8.27547e-41	1.33333
Wnk1	4.86699e-39	0.424477	0.761	0.571	8.62333e-35	1.33275
Draxin	4.31538e-28	0.308947	0.811	0.61	7.64598e-24	1.32951
Rapgef6	2.61512e-18	0.258755	0.548	0.413	4.63346e-14	1.32688
Rbms1	2.24036e-28	0.4371	0.735	0.556	3.96948e-24	1.32194
Tcerg1	2.39862e-15	0.270955	0.653	0.494	4.24988e-11	1.32186
Dclk1	1.0186e-44	0.522327	0.808	0.612	1.80476e-40	1.32026
Sdk1	1.35354e-48	0.469292	0.892	0.676	2.3982e-44	1.31953
Boc	3.86966e-40	0.431048	0.867	0.659	6.85627e-36	1.31563
Zfp462	9.04797e-25	0.293849	0.698	0.532	1.60312e-20	1.31203
Robo1	3.36117e-27	0.36858	0.724	0.555	5.95533e-23	1.3045
Myef2	2.29467e-16	0.29848	0.639	0.493	4.0657e-12	1.29615
Pds5b	1.18464e-21	0.297898	0.769	0.6	2.09894e-17	1.28167
Cdkal1	6.39979e-17	0.309358	0.775	0.607	1.13391e-12	1.27677
Pak3	1.80089e-32	0.42974	0.779	0.611	3.19082e-28	1.27496
Tead1	1.53756e-46	0.423239	0.883	0.693	2.72425e-42	1.27417
Pard3	3.16246e-35	0.379826	0.852	0.669	5.60325e-31	1.27354
Grid2	7.76937e-52	0.508289	0.886	0.696	1.37658e-47	1.27299
Magi1	2.91503e-40	0.404476	0.83	0.656	5.16485e-36	1.26524
Ppp6r3	3.01268e-12	0.256584	0.702	0.562	5.33787e-08	1.24911
Arid1a	8.0884e-08	0.259295	0.705	0.568	0.0014331	1.2412
Kif21a	2.80355e-22	0.250938	0.717	0.579	4.96733e-18	1.23834
Hnrnpa2b1	1.18309e-48	0.422471	0.887	0.721	2.0962e-44	1.23024
Fto	4.48983e-14	0.258958	0.804	0.656	7.95507e-10	1.22561
Ptch1	4.07233e-224	1.00424	0.987	0.814	7.21535e-220	1.21253
Ncor2	5.87108e-92	0.643011	0.967	0.798	1.04024e-87	1.21178
Cux1	5.33482e-23	0.250308	0.826	0.682	9.45223e-19	1.21114
Tshz2	2.00566e-42	0.412559	0.923	0.763	3.55362e-38	1.2097
Gm26917	2.23491e-21	0.470561	0.769	0.643	3.95982e-17	1.19596
Cdk6	7.58356e-56	0.449183	0.959	0.802	1.34366e-51	1.19576
[truncated: 560 more rows]

## Sheet: cluster 8
gene	p_val	avg_log2FC	fraction + in cluster	fraction + not in cluster	p_val_adj	ratio + in:out of cluster
[truncated: 1,266 more rows]

[truncated: 8 more sheets: cluster 9, cluster 10, cluster 11, cluster 12, cluster 13, cluster 14, cluster 15, proliferative cells CT-179vsCtl]
