# Supplementary material for: Preventing recurrence in Sonic Hedgehog Subgroup Medulloblastoma using OLIG2 inhibitor CT-179
Source: Research Square preprint supplement (doi:10.21203/rs.3.rs-2949436/v1), 2023-06-09
Supplement: Supplementary file 3 [file f5bcda1cd1d7976262c0b1ce.xlsx]

## Sheet: cluster 0
gene	p_val	avg_log2FC	fraction + in cluster	fraction + not in cluster	p_val_adj	ratio + in:out of cluster
Esco2	9.06746e-28	0.896557	0.302	0.095	1.60657e-23	3.17894
Ccne2	4.19477e-20	0.640823	0.183	0.058	7.4323e-16	3.15517
Hist1h1b	6.74747e-38	1.00932	0.312	0.101	1.19552e-33	3.08911
Neil3	5.6968e-55	1.29355	0.506	0.165	1.00936e-50	3.06666
Brip1	5.6195e-32	1.03579	0.389	0.132	9.95663e-28	2.94697
Clspn	3.0863e-44	1.06918	0.409	0.142	5.4683e-40	2.88028
Tyms	4.39559e-20	0.652356	0.216	0.075	7.7881e-16	2.88
Rrm2	4.82773e-14	0.494173	0.151	0.053	8.55377e-10	2.84905
Pclaf	7.39582e-43	0.950388	0.332	0.117	1.31039e-38	2.8376
E2f8	1.68842e-12	0.625844	0.198	0.071	2.99155e-08	2.78873
E2f7	1.53825e-38	1.04127	0.412	0.153	2.72548e-34	2.69281
Brca1	2.26637e-35	1.09155	0.441	0.164	4.01556e-31	2.68902
Zfp367	2.97657e-19	0.747798	0.263	0.098	5.27388e-15	2.68367
Exo1	1.81867e-21	0.642067	0.229	0.087	3.22232e-17	2.63218
Atad2	2.5917e-82	1.38962	0.649	0.248	4.59197e-78	2.61693
Gpc3	1.07825e-24	0.797454	0.238	0.091	1.91044e-20	2.61538
Kntc1	6.7365e-24	1.032	0.421	0.161	1.19357e-19	2.61491
Cdc45	1.39754e-19	0.57335	0.201	0.077	2.47617e-15	2.61039
E2f2	6.02319e-07	0.504169	0.163	0.063	0.0106719	2.5873
Kif15	3.95409e-79	1.31285	0.682	0.264	7.00585e-75	2.58333
Rad51ap1	1.42343e-20	0.665994	0.242	0.094	2.52204e-16	2.57447
Ncapg2	4.26771e-43	1.04164	0.441	0.173	7.56153e-39	2.54913
Fancd2	3.34654e-24	0.670217	0.239	0.094	5.9294e-20	2.54255
Fanci	3.18167e-12	0.564877	0.193	0.077	5.63729e-08	2.50649
Rad51	4.37397e-14	0.576146	0.202	0.081	7.7498e-10	2.49382
Fanca	1.79047e-18	0.672769	0.257	0.104	3.17235e-14	2.47115
Mcm10	5.69287e-09	0.6162	0.217	0.088	0.000100866	2.46591
Melk	1.52497e-16	0.669767	0.246	0.1	2.70194e-12	2.46
Top2a	1.90755e-89	1.26192	0.8	0.326	3.3798e-85	2.45399
Myb	6.77858e-11	0.517579	0.184	0.075	1.20103e-06	2.45333
Bard1	1.06298e-15	0.792604	0.301	0.123	1.88339e-11	2.44715
Diaph3	8.29288e-123	1.51036	0.846	0.346	1.46933e-118	2.44509
Rad54l	5.51094e-18	0.494111	0.172	0.071	9.76428e-14	2.42253
Pole	1.98853e-27	0.88856	0.388	0.161	3.52328e-23	2.40994
Hist1h1e	6.68184e-23	0.793121	0.289	0.12	1.18389e-18	2.40833
Cenpp	2.31261e-84	1.35134	0.703	0.294	4.09748e-80	2.39116
Mbnl3	4.43748e-09	0.475063	0.153	0.064	7.86232e-05	2.39062
Hs6st2	5.53145e-19	0.7979	0.272	0.114	9.80063e-15	2.38596
Pcna	4.58585e-10	0.614459	0.235	0.099	8.12521e-06	2.37373
Gli3	3.60798e-30	0.915897	0.348	0.147	6.39261e-26	2.36735
Dna2	1.10175e-08	0.494017	0.175	0.074	0.000195208	2.36486
Zwilch	1.25477e-18	0.593409	0.217	0.092	2.2232e-14	2.35869
Kif11	3.22598e-43	1.02766	0.598	0.254	5.71579e-39	2.35433
Iqgap3	1.21167e-11	0.650928	0.247	0.105	2.14684e-07	2.35238
Pask	2.10096e-09	0.462966	0.168	0.072	3.72248e-05	2.33333
Rad54b	2.24503e-20	0.777099	0.324	0.14	3.97775e-16	2.31428
Rrm1	4.16651e-26	0.803871	0.357	0.155	7.38222e-22	2.30322
Ndc80	5.36555e-21	0.657469	0.273	0.119	9.50668e-17	2.29412
Polq	1.7109e-32	0.925749	0.428	0.187	3.03138e-28	2.28877
Ticrr	1.06485e-19	0.651353	0.263	0.115	1.8867e-15	2.28695
Ntng1	6.39132e-11	0.582069	0.164	0.072	1.13241e-06	2.27777
Uhrf1	4.18808e-17	0.605032	0.236	0.104	7.42044e-13	2.26923
Rmi2	8.30804e-10	0.565098	0.22	0.097	1.47202e-05	2.26804
Fbxo5	9.89146e-10	0.458675	0.154	0.068	1.75257e-05	2.2647
Stil	2.87162e-21	0.661829	0.267	0.118	5.08793e-17	2.26271
Plekha7	8.46715e-15	0.587874	0.208	0.092	1.50021e-10	2.26087
Ncapg	5.25494e-28	0.759216	0.341	0.151	9.31071e-24	2.25828
Cacnb2	4.89858e-27	0.904296	0.354	0.157	8.6793e-23	2.25478
Cenpk	7.21145e-16	0.600463	0.236	0.105	1.27772e-11	2.24762
Knl1	1.53775e-37	0.949321	0.586	0.262	2.72458e-33	2.23664
Lig1	5.65672e-33	0.884289	0.409	0.183	1.00226e-28	2.23497
Rad51b	1.20541e-71	1.43279	0.719	0.323	2.13575e-67	2.22601
Bub1	9.52193e-17	0.721463	0.315	0.143	1.6871e-12	2.2028
Grik1	1.52783e-17	0.785522	0.262	0.119	2.70702e-13	2.20168
Aurkb	1.68716e-09	0.467271	0.18	0.082	2.98932e-05	2.19512
Zgrf1	8.08633e-33	0.895353	0.449	0.205	1.43274e-28	2.19024
Wdr76	1.45589e-14	0.623199	0.254	0.116	2.57954e-10	2.18965
Kif4	4.98285e-31	0.806972	0.43	0.198	8.82862e-27	2.17172
Slbp	9.32731e-13	0.462067	0.178	0.082	1.65261e-08	2.17073
Plk4	1.98954e-07	0.632393	0.26	0.121	0.00352506	2.14876
Wdhd1	4.29148e-15	0.671335	0.298	0.139	7.60365e-11	2.14388
Dtl	2.55944e-24	0.891673	0.465	0.217	4.53481e-20	2.14286
Shcbp1	9.79713e-09	0.524664	0.195	0.091	0.000173586	2.14285
Foxm1	6.3424e-14	0.571093	0.226	0.107	1.12375e-09	2.11215
Nuf2	2.97556e-11	0.564276	0.228	0.108	5.27209e-07	2.11111
Cenpi	4.29787e-09	0.5452	0.219	0.104	7.61496e-05	2.10577
Cit	1.30931e-35	0.871916	0.51	0.243	2.31983e-31	2.09876
Incenp	4.52204e-26	0.759567	0.408	0.195	8.01214e-22	2.09231
Spag5	1.42509e-11	0.588585	0.255	0.122	2.52498e-07	2.09016
Prim1	2.56918e-06	0.484209	0.198	0.095	0.0455207	2.08421
Hells	2.85684e-30	0.798981	0.401	0.193	5.06176e-26	2.07772
Atp10a	7.92598e-12	0.417809	0.23	0.111	1.40433e-07	2.07207
Kif24	2.23025e-22	0.730606	0.333	0.161	3.95155e-18	2.06832
Chaf1a	1.94317e-05	0.427696	0.175	0.085	0.34429	2.05882
Atad5	6.90939e-47	0.986859	0.537	0.261	1.22421e-42	2.05747
Iqgap2	6.40053e-14	0.655422	0.299	0.146	1.13405e-09	2.04794
Cdca2	8.49216e-18	0.695898	0.383	0.188	1.50464e-13	2.03723
Mastl	5.23416e-12	0.550638	0.226	0.111	9.27389e-08	2.03603
Ncaph	1.30525e-13	0.539455	0.237	0.117	2.31264e-09	2.02564
Mki67	2.29038e-91	1.09083	0.886	0.439	4.05809e-87	2.01822
Adamts19	4.32298e-08	0.486559	0.182	0.091	0.000765946	2
Mybl1	2.94881e-08	0.434658	0.162	0.081	0.00052247	2
Prim2	7.69148e-39	0.950351	0.549	0.276	1.36278e-34	1.98913
Mns1	2.38059e-09	0.443327	0.176	0.089	4.21794e-05	1.97753
Ttk	1.14537e-17	0.569807	0.266	0.135	2.02936e-13	1.97037
Rbl1	3.57157e-15	0.654358	0.317	0.161	6.32811e-11	1.96894
Brca2	2.32925e-20	0.763694	0.395	0.201	4.12697e-16	1.96517
Rad18	2.9394e-19	0.732465	0.375	0.191	5.20803e-15	1.96335
Dhfr	9.78416e-09	0.464167	0.19	0.097	0.000173356	1.95876
Mms22l	1.40052e-32	0.886439	0.504	0.258	2.48145e-28	1.95349
Espl1	2.66116e-08	0.473332	0.203	0.104	0.000471505	1.95192
Rpa1	8.09725e-12	0.591491	0.267	0.138	1.43467e-07	1.93478
Zranb3	4.64451e-13	0.640642	0.307	0.159	8.22915e-09	1.93082
Spidr	1.60185e-23	0.685486	0.334	0.174	2.83816e-19	1.91954
Gm16070	2.188e-08	0.495119	0.184	0.096	0.00038767	1.91666
Mcm3	4.19955e-08	0.398506	0.173	0.091	0.000744077	1.9011
Zdhhc15	2.29138e-06	0.387242	0.155	0.082	0.0405987	1.89024
Blm	6.3196e-21	0.741654	0.417	0.221	1.11971e-16	1.88688
Topbp1	4.39832e-19	0.705191	0.413	0.219	7.79294e-15	1.88584
Cep128	1.45303e-44	0.97966	0.626	0.333	2.57449e-40	1.87988
Timeless	3.52009e-14	0.479982	0.231	0.123	6.2369e-10	1.87805
Ubr7	9.87907e-07	0.377794	0.165	0.088	0.0175037	1.875
Smc2	1.06755e-59	1.02708	0.734	0.392	1.89149e-55	1.87245
Ttf2	3.04755e-07	0.375828	0.155	0.083	0.00539965	1.86747
Tenm3	3.60037e-53	0.954851	0.574	0.308	6.37913e-49	1.86364
Skp2	6.13005e-12	0.490691	0.24	0.129	1.08612e-07	1.86046
Tbc1d31	3.12379e-08	0.525615	0.238	0.128	0.000553474	1.85937
Efcab11	5.14466e-15	0.693346	0.388	0.209	9.11532e-11	1.85646
Cdca8	3.93017e-07	0.365056	0.15	0.081	0.00696347	1.85185
Smc4	3.34104e-48	0.908826	0.687	0.372	5.91965e-44	1.84677
Pola2	4.04814e-06	0.503342	0.24	0.13	0.0717249	1.84615
Cdk1	8.09049e-13	0.451558	0.214	0.116	1.43347e-08	1.84483
Anln	6.8996e-11	0.563959	0.343	0.186	1.22247e-06	1.84409
Gli1	2.80061e-31	0.737538	0.431	0.235	4.96212e-27	1.83404
Mtbp	5.25937e-12	0.630553	0.342	0.187	9.31856e-08	1.82888
Cep152	3.56707e-15	0.633015	0.34	0.186	6.32013e-11	1.82796
Rfwd3	1.98479e-12	0.504728	0.251	0.138	3.51664e-08	1.81884
Cdc7	9.67163e-10	0.418367	0.2	0.11	1.71362e-05	1.81818
Lockd	2.91934e-06	0.529592	0.289	0.159	0.0517248	1.81761
Bmpr1b	5.21471e-07	0.52358	0.241	0.133	0.00923942	1.81203
Mcm6	6.18779e-10	0.48689	0.271	0.15	1.09635e-05	1.80667
Dek	8.90782e-40	0.874797	0.567	0.314	1.57829e-35	1.80573
Hat1	3.61034e-09	0.465812	0.236	0.131	6.39679e-05	1.80153
Pold3	4.59813e-18	0.588784	0.334	0.186	8.14696e-14	1.7957
Ror2	4.4064e-23	0.742026	0.448	0.25	7.80726e-19	1.792
Racgap1	2.46105e-17	0.590557	0.344	0.193	4.36048e-13	1.78238
Ccna2	3.45471e-05	0.365094	0.162	0.091	0.612105	1.78022
Gpc6	5.37588e-131	1.48393	0.93	0.524	9.52498e-127	1.77481
Kif22	3.97793e-07	0.400523	0.195	0.11	0.00704809	1.77273
Fat3	1.03079e-38	0.925581	0.632	0.357	1.82635e-34	1.77031
Dnmt1	3.07386e-18	0.771052	0.489	0.277	5.44627e-14	1.76534
Haus6	5.75623e-17	0.551351	0.305	0.173	1.01989e-12	1.763
Ckap2l	5.03654e-08	0.448161	0.245	0.139	0.000892373	1.76259
Ncapd3	5.02621e-31	0.785659	0.53	0.301	8.90545e-27	1.7608
Mcm5	2.77989e-11	0.403686	0.213	0.121	4.92541e-07	1.76033
Pola1	1.46018e-81	1.17291	0.811	0.461	2.58714e-77	1.75922
Adamts20	2.36933e-14	0.641858	0.391	0.223	4.19798e-10	1.75336
Vrk1	2.06635e-11	0.515586	0.28	0.16	3.66117e-07	1.75
Nusap1	4.52193e-06	0.480714	0.245	0.14	0.0801195	1.75
Tpx2	2.68103e-11	0.50587	0.362	0.207	4.75026e-07	1.74879
Cdca7l	0.000256364	0.317698	0.162	0.093	1	1.74193
Mcm4	4.2697e-06	0.357032	0.172	0.099	0.0756505	1.73737
Hmgb2	2.2305e-10	0.449528	0.239	0.138	3.952e-06	1.73188
Bub1b	3.25016e-09	0.443798	0.239	0.138	5.75863e-05	1.73188
Hirip3	6.23416e-09	0.397478	0.206	0.119	0.000110457	1.73109
Lin54	5.38407e-07	0.430043	0.214	0.124	0.0095395	1.72581
Hhip	5.03031e-24	0.73791	0.442	0.257	8.9127e-20	1.71984
Ndc1	0.000159624	0.428533	0.223	0.13	1	1.71538
Sae1	2.96872e-21	0.646347	0.427	0.249	5.25998e-17	1.71486
Hmgn2	0.000181337	0.333363	0.161	0.094	1	1.71276
Wee1	0.000234462	0.428283	0.207	0.121	1	1.71074
Usp13	1.15543e-05	0.361015	0.176	0.103	0.20472	1.70874
Rbbp8	1.95622e-17	0.550945	0.314	0.184	3.46603e-13	1.70652
Cdh8	3.03557e-21	0.763056	0.501	0.297	5.37841e-17	1.68687
Ctps	5.20242e-12	0.444303	0.256	0.152	9.21765e-08	1.68421
Ccp110	1.96311e-10	0.535542	0.33	0.196	3.47824e-06	1.68367
Vsx2	5.36638e-08	0.476022	0.225	0.134	0.000950815	1.6791
Sgo1	6.00486e-06	0.318087	0.156	0.093	0.106394	1.67742
Cep192	3.74268e-20	0.664026	0.461	0.275	6.63128e-16	1.67636
Cklf	1.68221e-11	0.483727	0.276	0.165	2.98054e-07	1.67273
Mdc1	4.42033e-10	0.485994	0.285	0.171	7.83195e-06	1.66667
Ect2	1.33916e-07	0.442481	0.324	0.195	0.00237273	1.66154
Tacc3	5.17635e-05	0.403924	0.243	0.147	0.917146	1.65306
Adcy2	3.70789e-08	0.484937	0.269	0.163	0.000656963	1.65031
Usp1	1.81725e-07	0.399161	0.216	0.131	0.00321981	1.64885
Ncapd2	5.54831e-14	0.649985	0.469	0.285	9.83049e-10	1.64561
Anp32b	8.68275e-09	0.53111	0.345	0.21	0.000153841	1.64286
Pcgf5	0.00907409	0.411358	0.238	0.145	1	1.64138
Usp44	0.000120953	0.303319	0.154	0.094	1	1.6383
Pex5l	6.10965e-11	0.593009	0.402	0.246	1.08251e-06	1.63415
Tnfaip8	9.56726e-10	0.586197	0.41	0.251	1.69513e-05	1.63347
Rgs20	7.64252e-28	0.844166	0.59	0.363	1.3541e-23	1.62534
Kif20b	2.90276e-11	0.410131	0.398	0.245	5.14311e-07	1.62449
Rnf168	0.000105805	0.317163	0.155	0.096	1	1.61458
Mis18bp1	0.000114508	0.364909	0.292	0.181	1	1.61326
Polh	0.000733222	0.296034	0.15	0.093	1	1.6129
Csgalnact1	1.57775e-10	0.389413	0.214	0.133	2.79547e-06	1.60902
Depdc1b	2.44224e-06	0.363549	0.209	0.13	0.0432717	1.60769
Ccdc82	2.10165e-10	0.392777	0.212	0.132	3.7237e-06	1.60606
Stxbp6	2.7389e-25	0.737619	0.562	0.35	4.85278e-21	1.60571
Tmpo	1.63464e-23	0.730855	0.618	0.385	2.89625e-19	1.60519
Paxip1	3.5574e-06	0.534748	0.338	0.211	0.0630301	1.60189
Prkcq	4.74981e-07	0.38205	0.211	0.132	0.00841572	1.59848
Nasp	5.30806e-32	0.806814	0.688	0.432	9.40482e-28	1.59259
Tfdp1	8.9537e-07	0.496337	0.328	0.206	0.0158642	1.59223
Gjc1	5.78703e-08	0.497625	0.339	0.213	0.00102535	1.59155
Cep135	2.12359e-11	0.492154	0.313	0.197	3.76258e-07	1.58883
E2f1	0.00550169	0.293892	0.165	0.104	1	1.58654
Zw10	0.0154709	0.294774	0.165	0.104	1	1.58654
Ipo5	3.98178e-12	0.4696	0.306	0.193	7.05492e-08	1.58549
Ckap2	1.1171e-08	0.372964	0.225	0.142	0.000197927	1.58451
Ranbp1	3.48078e-07	0.321616	0.182	0.115	0.00616724	1.58261
Kif23	2.87428e-06	0.331135	0.282	0.179	0.0509265	1.57542
Mre11a	1.23687e-09	0.393298	0.222	0.141	2.19149e-05	1.57447
Cntln	1.81108e-20	0.698455	0.521	0.331	3.20888e-16	1.57402
Il4i1	0.00015185	0.282882	0.154	0.098	1	1.57143
Rfc1	3.60061e-15	0.604864	0.457	0.291	6.37957e-11	1.57045
Nup155	1.37014e-09	0.528084	0.382	0.244	2.42762e-05	1.56557
Prr11	0.00214556	0.299698	0.169	0.108	1	1.56481
Usp37	2.40597e-11	0.573255	0.424	0.271	4.2629e-07	1.56458
Cenpj	7.07959e-10	0.419611	0.265	0.17	1.25436e-05	1.55882
Med12l	8.16862e-39	0.838454	0.703	0.451	1.44732e-34	1.55876
Slc7a1	5.47629e-09	0.401968	0.36	0.231	9.7029e-05	1.55844
Aars	3.28616e-05	0.287324	0.162	0.104	0.582241	1.55769
Adgrv1	0.00395891	0.355199	0.168	0.108	1	1.55555
Nup85	5.45821e-06	0.395788	0.241	0.155	0.0967086	1.55484
Rif1	1.83478e-25	0.734289	0.642	0.413	3.25086e-21	1.55448
Nop56	5.16172e-09	0.470194	0.349	0.225	9.14554e-05	1.55111
Kctd8	1.71075e-11	0.527937	0.375	0.243	3.03111e-07	1.54321
Rangap1	1.21053e-08	0.427277	0.276	0.179	0.000214482	1.5419
Rtkn2	1.12958e-06	0.337612	0.194	0.126	0.020014	1.53968
Eya4	9.13157e-14	0.572707	0.514	0.334	1.61793e-09	1.53892
Mcph1	1.14438e-18	0.667808	0.558	0.363	2.02761e-14	1.53719
Nhs	2.72586e-18	0.622373	0.519	0.338	4.82968e-14	1.5355
Gli2	6.15259e-48	0.896115	0.848	0.553	1.09012e-43	1.53345
Hpca	2.18596e-10	0.489987	0.303	0.198	3.87309e-06	1.5303
Kif18a	9.72405e-07	0.364883	0.28	0.183	0.0172291	1.53005
Dbf4	3.00884e-05	0.325165	0.191	0.125	0.533106	1.528
Aim2	1.99656e-05	0.370911	0.194	0.127	0.353751	1.52756
Kif18b	0.00185155	0.297861	0.197	0.129	1	1.52713
Rbbp7	4.1631e-08	0.412288	0.268	0.176	0.000737619	1.52273
Kitl	1.9018e-06	0.362079	0.289	0.19	0.0336961	1.52105
Cep290	1.08665e-10	0.479707	0.339	0.223	1.92532e-06	1.52018
Lmnb1	4.56265e-26	0.594295	0.535	0.352	8.0841e-22	1.51989
Xntrpc	5.35765e-07	0.368094	0.231	0.152	0.00949269	1.51974
Lbr	6.70652e-10	0.475404	0.338	0.223	1.18826e-05	1.51569
Kcnq3	5.18231e-17	0.648549	0.561	0.371	9.18202e-13	1.51213
Fkbp5	1.66676e-06	0.376542	0.24	0.159	0.0295316	1.50943
Prkd1	1.0373e-15	0.522383	0.473	0.314	1.83788e-11	1.50637
Suz12	2.04665e-19	0.54573	0.459	0.306	3.62625e-15	1.5
Gmds	6.64011e-16	0.553034	0.469	0.313	1.1765e-11	1.4984
Ctdspl2	2.50816e-07	0.497674	0.391	0.261	0.00444396	1.49808
Kcnq5	7.71888e-18	0.347043	0.723	0.483	1.36763e-13	1.49689
Ccnf	0.0265774	0.297004	0.196	0.131	1	1.49618
Plscr4	0.00175699	0.299722	0.19	0.127	1	1.49606
Ppat	0.0161379	0.283159	0.184	0.123	1	1.49593
Lgr5	0.00118844	0.278153	0.154	0.103	1	1.49514
Smc6	7.45372e-19	0.604896	0.502	0.336	1.32065e-14	1.49405
Clic4	4.97867e-11	0.492163	0.359	0.241	8.82122e-07	1.48963
H2afv	0.000369996	0.357859	0.238	0.16	1	1.4875
Alg13	6.04124e-05	0.362669	0.223	0.15	1	1.48667
Tubgcp3	1.11699e-06	0.375372	0.273	0.184	0.0197908	1.48369
Sorcs2	2.56472e-08	0.500648	0.408	0.275	0.000454417	1.48364
Hjurp	1.57516e-22	0.622158	0.686	0.463	2.79086e-18	1.48164
Pard3b	2.66677e-39	0.792254	0.766	0.517	4.72498e-35	1.48162
Casp8ap2	1.81756e-09	0.416493	0.32	0.216	3.22035e-05	1.48148
E2f3	4.6529e-15	0.623445	0.553	0.374	8.244e-11	1.47861
Srsf10	9.3187e-11	0.476216	0.414	0.28	1.65109e-06	1.47857
Garem1	0.000224267	0.298355	0.192	0.13	1	1.47692
Cars	2.6717e-07	0.303764	0.158	0.107	0.00473371	1.47663
Prc1	9.96235e-07	0.311186	0.251	0.17	0.0176513	1.47647
Ccdc34	1.3003e-08	0.41329	0.282	0.191	0.000230388	1.47644
Cdc25a	7.01614e-07	0.292551	0.186	0.126	0.0124312	1.47619
Ccdc18	0.00557867	0.353335	0.233	0.158	1	1.47468
Npat	2.76622e-05	0.426394	0.311	0.211	0.490119	1.47393
Slco3a1	0.000512405	0.367278	0.218	0.148	1	1.47297
Mthfd1l	2.33571e-11	0.516273	0.402	0.273	4.13841e-07	1.47253
Grin3a	4.54825e-10	0.39579	0.321	0.218	8.05858e-06	1.47248
Nfya	0.218606	0.278043	0.156	0.106	1	1.4717
Pa2g4	3.80587e-06	0.366642	0.284	0.193	0.0674325	1.4715
Brip1os	5.26214e-15	0.494502	0.378	0.257	9.32346e-11	1.47082
Nup107	0.00033111	0.326198	0.219	0.149	1	1.4698
Slc20a1	0.088403	0.270831	0.167	0.114	1	1.46491
Dgcr8	1.43577e-08	0.440243	0.347	0.237	0.000254389	1.46413
Angptl2	6.67127e-06	0.318044	0.243	0.166	0.118202	1.46385
Gm48530	0.00199576	0.326296	0.206	0.141	1	1.46099
Cep57	1.24726e-06	0.332268	0.222	0.152	0.0220989	1.46053
Chsy3	1.49694e-07	0.386931	0.239	0.164	0.00265227	1.45732
Sgo2a	0.00106067	0.267222	0.185	0.127	1	1.45669
Rtel1	0.000563452	0.30039	0.205	0.141	1	1.4539
Hk2	1.18107e-06	0.335569	0.244	0.168	0.0209262	1.45238
Ska2	3.49971e-05	0.342051	0.232	0.16	0.620078	1.45
Rgma	4.10505e-06	0.413954	0.332	0.229	0.0727332	1.44978
Sfmbt1	9.13831e-11	0.554807	0.519	0.358	1.61913e-06	1.44972
Sass6	5.75467e-06	0.325932	0.223	0.154	0.101961	1.44805
Tmtc1	6.77522e-13	0.506202	0.417	0.288	1.20043e-08	1.44792
Kank1	0.0131718	0.403951	0.253	0.175	1	1.44571
Ctdspl	8.02005e-05	0.365876	0.257	0.178	1	1.44382
Tcf7l1	0.000448905	0.288089	0.176	0.122	1	1.44262
Lrig3	7.70262e-16	0.590363	0.664	0.462	1.36475e-11	1.43723
Pcsk5	4.57551e-07	0.310616	0.195	0.136	0.00810689	1.43382
Ddr2	3.10543e-10	0.499542	0.41	0.286	5.5022e-06	1.43357
Nup210	4.40759e-10	0.434881	0.377	0.263	7.80937e-06	1.43346
Mpdz	1.07003e-08	0.516428	0.514	0.359	0.000189588	1.43175
Azin1	2.91043e-09	0.369068	0.276	0.193	5.1567e-05	1.43005
Dock10	6.21905e-12	0.340886	0.357	0.25	1.10189e-07	1.428
Mdga2	7.87726e-09	0.400789	0.468	0.328	0.000139569	1.42683
Pkp4	1.10718e-14	0.463405	0.599	0.42	1.96171e-10	1.42619
Pfas	0.000710338	0.282691	0.211	0.148	1	1.42567
Srsf4	1.31317e-09	0.4692	0.419	0.294	2.32667e-05	1.42517
Anp32e	5.06714e-06	0.395841	0.316	0.222	0.0897796	1.42342
Pms1	7.81258e-06	0.337971	0.249	0.175	0.138423	1.42286
Vars	0.00656913	0.27956	0.196	0.138	1	1.42029
Pdlim3	1.11221e-11	0.429957	0.484	0.341	1.97061e-07	1.41935
Atm	4.63508e-11	0.472963	0.447	0.315	8.21244e-07	1.41905
Mamdc2	2.62594e-05	0.331984	0.254	0.179	0.465265	1.41899
Naa50	0.0191532	0.296425	0.217	0.153	1	1.4183
Dcbld2	1.2865e-07	0.378022	0.302	0.213	0.00227942	1.41784
Nup133	0.00542069	0.306642	0.207	0.146	1	1.41781
Tbc1d1	3.25062e-06	0.351264	0.265	0.187	0.0575946	1.41711
Rttn	1.80519e-11	0.424529	0.344	0.243	3.19844e-07	1.41564
Galnt13	1.81126e-09	0.458493	0.491	0.347	3.20919e-05	1.41499
Cmtm4	3.71097e-09	0.415381	0.393	0.278	6.5751e-05	1.41367
Sgcd	1.24848e-13	0.705478	0.564	0.399	2.21206e-09	1.41353
Tbata	0.00125022	0.335838	0.26	0.184	1	1.41304
Cdk5rap2	1.46555e-21	0.599409	0.649	0.46	2.59666e-17	1.41087
Supt16	1.56491e-14	0.506953	0.492	0.349	2.77271e-10	1.40974
Cse1l	4.39522e-05	0.347727	0.265	0.188	0.778745	1.40957
Ahctf1	2.11653e-10	0.479566	0.439	0.312	3.75006e-06	1.40705
Nedd1	3.28478e-05	0.291255	0.194	0.138	0.581997	1.4058
Ssrp1	1.57562e-06	0.366545	0.288	0.205	0.0279169	1.40488
Nap1l1	9.24519e-08	0.461173	0.465	0.331	0.00163806	1.40483
Lin9	7.13744e-05	0.301073	0.209	0.149	1	1.40268
Cdh4	4.85798e-27	0.656084	0.732	0.522	8.60737e-23	1.4023
Ipo7	5.49344e-07	0.426683	0.408	0.291	0.00973327	1.40206
Pcnt	1.15702e-09	0.459152	0.443	0.316	2.05001e-05	1.4019
Kcnt2	0.0003741	0.381493	0.248	0.177	1	1.40113
Arhgap10	1.02002e-10	0.433804	0.374	0.267	1.80728e-06	1.40075
Neto2	3.26012e-07	0.408647	0.329	0.235	0.00577628	1.4
Nop58	2.61096e-13	0.40942	0.398	0.285	4.62609e-09	1.39649
Khdrbs3	0.000129571	0.37655	0.317	0.227	1	1.39648
Ncaph2	0.00073184	0.266334	0.198	0.142	1	1.39437
Nup160	1.60675e-06	0.341319	0.284	0.204	0.0284683	1.39216
Rad50	0.000450399	0.304578	0.199	0.143	1	1.39161
Psat1	0.00705925	0.259313	0.178	0.128	1	1.39062
Ptch2	2.05517e-10	0.526837	0.602	0.433	3.64135e-06	1.3903
Kcnh5	8.03057e-10	0.395324	0.382	0.275	1.42286e-05	1.38909
Ezh2	1.16777e-31	0.635723	0.705	0.508	2.06906e-27	1.3878
Diaph2	3.4632e-15	0.486496	0.578	0.417	6.13609e-11	1.38609
Adamts1	0.00144271	0.254118	0.216	0.156	1	1.38461
Grid2ip	2.1597e-05	0.361744	0.328	0.237	0.382656	1.38397
Nectin1	0.00951636	0.254025	0.178	0.129	1	1.37984
Smchd1	5.90885e-23	0.603873	0.676	0.49	1.04693e-18	1.37959
Taf1d	2.68586e-08	0.457745	0.477	0.346	0.000475881	1.37861
Mpp6	4.45901e-07	0.322546	0.295	0.214	0.00790047	1.3785
Bcar3	2.24497e-05	0.35379	0.23	0.167	0.397764	1.37724
Ptges3	0.000137072	0.287551	0.209	0.152	1	1.375
Hpf1	3.7606e-05	0.270934	0.198	0.144	0.666302	1.375
Fancm	0.035872	0.303486	0.243	0.177	1	1.37288
Pitpnm2	0.000859528	0.389249	0.398	0.29	1	1.37241
Smco4	0.0014088	0.28226	0.216	0.158	1	1.36709
Dleu2	1.51879e-15	0.543488	0.611	0.448	2.69099e-11	1.36384
Yars	0.000250342	0.27419	0.188	0.138	1	1.36232
Mcm9	0.0108236	0.264596	0.207	0.152	1	1.36184
Angpt1	0.00315574	0.286037	0.192	0.141	1	1.3617
Chsy1	1.02348e-05	0.335257	0.324	0.238	0.18134	1.36134
Nsd2	1.34074e-48	0.754806	0.823	0.605	2.37553e-44	1.36033
Cbx5	1.50021e-28	0.591878	0.705	0.519	2.65807e-24	1.35838
Rad21	1.32236e-08	0.372638	0.474	0.349	0.000234296	1.35817
Nup153	1.78939e-07	0.443364	0.459	0.338	0.00317044	1.35799
Mum1	6.86983e-06	0.303122	0.258	0.19	0.12172	1.35789
Epha5	0.141016	0.374129	0.262	0.193	1	1.35751
Hnrnpa3	8.82005e-07	0.385987	0.399	0.294	0.0156274	1.35714
Cebpg	0.000291109	0.265757	0.209	0.154	1	1.35714
Senp1	1.7208e-10	0.381838	0.331	0.244	3.04891e-06	1.35656
Cep250	6.24462e-06	0.340644	0.301	0.222	0.110642	1.35586
Srsf7	1.39209e-08	0.362201	0.362	0.267	0.00024665	1.3558
Mcm7	1.28316e-06	0.304906	0.271	0.2	0.022735	1.355
Baz1b	9.61294e-22	0.564676	0.668	0.493	1.70322e-17	1.35497
Alcam	2.83489e-22	0.527446	0.64	0.473	5.02286e-18	1.35307
Nup93	0.0132283	0.288925	0.23	0.17	1	1.35294
Dusp10	0.000158867	0.25945	0.184	0.136	1	1.35294
Ybx3	0.00441692	0.308464	0.265	0.196	1	1.35204
Galnt2	1.49785e-10	0.427458	0.396	0.293	2.65389e-06	1.35154
Raly	2.67913e-06	0.428488	0.431	0.319	0.0474688	1.3511
Gm47283	3.04805e-15	0.631654	0.678	0.502	5.40054e-11	1.3506
Ccnd1	1.23007e-09	0.382942	0.474	0.351	2.17943e-05	1.35043
Ndufaf2	7.38124e-05	0.260367	0.212	0.157	1	1.35032
Mthfd1	0.027981	0.279459	0.22	0.163	1	1.34969
Dnajc21	0.000818424	0.260898	0.201	0.149	1	1.34899
Oxct1	5.07763e-08	0.446173	0.472	0.35	0.000899655	1.34857
Cbfb	4.4786e-10	0.415059	0.404	0.3	7.93518e-06	1.34667
Adamts14	0.023269	0.313755	0.338	0.251	1	1.34661
Alms1	3.74581e-09	0.435438	0.494	0.367	6.63683e-05	1.34605
Ift80	0.00307937	0.340857	0.292	0.217	1	1.34562
Notch2	0.00104804	0.279177	0.265	0.197	1	1.34518
Hmgb1	2.02903e-07	0.36503	0.367	0.273	0.00359504	1.34432
Smc5	6.18689e-11	0.475908	0.524	0.39	1.09619e-06	1.34359
Gpr153	0.000509197	0.302446	0.317	0.236	1	1.34322
Jph1	0.0242301	0.324704	0.278	0.207	1	1.34299
Trim37	2.33524e-08	0.385565	0.384	0.286	0.000413758	1.34266
Efna5	1.70161e-24	0.555202	0.675	0.503	3.01491e-20	1.34195
Cep295	8.40224e-06	0.391177	0.41	0.306	0.148871	1.33987
Gstcd	0.000137082	0.328869	0.284	0.212	1	1.33962
Sart3	0.0260947	0.255281	0.206	0.154	1	1.33766
Tshz3	7.99255e-07	0.372498	0.393	0.294	0.0141612	1.33673
Smc1a	6.46139e-10	0.43906	0.51	0.382	1.14483e-05	1.33508
Itpr1	3.65282e-07	0.284682	0.379	0.284	0.00647206	1.33451
Cep83	9.97649e-09	0.427898	0.471	0.353	0.000176763	1.33428
Dock1	2.54188e-27	0.606905	0.828	0.621	4.50371e-23	1.33333
Cep162	5.03547e-07	0.333367	0.308	0.231	0.00892185	1.33333
Simc1	8.23384e-06	0.288421	0.24	0.18	0.145887	1.33333
Ipo9	6.46205e-07	0.35688	0.357	0.268	0.0114495	1.33209
Eif2s2	0.00433532	0.261591	0.205	0.154	1	1.33117
Otud4	1.44953e-10	0.404571	0.435	0.327	2.56828e-06	1.33027
Pcx	0.000122074	0.302699	0.268	0.202	1	1.32673
Kpnb1	1.11744e-07	0.391052	0.386	0.291	0.00197987	1.32646
Rbbp4	0.000193544	0.364911	0.379	0.286	1	1.32517
Gsg1l	6.94337e-25	0.575728	0.903	0.682	1.23023e-20	1.32405
Tra2b	3.93493e-08	0.410688	0.495	0.374	0.00069719	1.32353
Taf1	2.6582e-05	0.345731	0.353	0.267	0.470981	1.3221
Hnrnpd	8.881e-11	0.441623	0.538	0.407	1.57354e-06	1.32187
Acer3	0.00220181	0.290021	0.22	0.167	1	1.31736
Fat1	2.94564e-05	0.317989	0.328	0.249	0.521909	1.31727
Boc	7.67105e-14	0.517716	0.819	0.622	1.35916e-09	1.31672
Slf1	3.12421e-12	0.389797	0.495	0.376	5.53547e-08	1.31649
Nr3c1	0.00215303	0.329961	0.333	0.253	1	1.31621
Baz1a	0.000523956	0.327968	0.379	0.288	1	1.31597
Eefsec	6.50605e-05	0.285874	0.26	0.198	1	1.31313
Pds5a	1.56669e-17	0.530318	0.689	0.525	2.77586e-13	1.31238
Epb41l5	0.019665	0.270575	0.232	0.177	1	1.31073
Snx25	8.3204e-06	0.304952	0.321	0.245	0.147421	1.3102
Nup188	0.0848759	0.305926	0.279	0.213	1	1.30986
Cherp	0.0978945	0.253496	0.25	0.191	1	1.3089
Plch1	0.0209001	0.263425	0.225	0.172	1	1.30814
Srbd1	6.94688e-07	0.355523	0.38	0.291	0.0123085	1.30584
Brpf1	0.00620158	0.302219	0.312	0.239	1	1.30544
Pde5a	0.385734	0.259804	0.248	0.19	1	1.30526
Gars	0.000750611	0.274832	0.219	0.168	1	1.30357
Snx5	0.01709	0.270449	0.275	0.211	1	1.30332
G3bp1	6.75543e-05	0.316468	0.331	0.254	1	1.30315
Taco1	0.00593639	0.336896	0.254	0.195	1	1.30256
Pdzd8	0.000200132	0.305317	0.306	0.235	1	1.30213
Ckap5	3.59185e-08	0.300157	0.544	0.418	0.000636404	1.30144
Aff2	2.3459e-07	0.432337	0.514	0.395	0.00415647	1.30127
Sema3e	4.9768e-07	0.257111	0.29	0.223	0.0088179	1.30045
Ipo11	2.33368e-10	0.372229	0.446	0.343	4.13482e-06	1.30029
Ranbp17	9.93798e-13	0.463959	0.551	0.424	1.76081e-08	1.29953
Mettl9	0.000102186	0.250505	0.261	0.201	1	1.29851
Hnrnpab	3.7738e-05	0.308921	0.328	0.253	0.668641	1.29644
Whrn	0.00842697	0.271717	0.385	0.297	1	1.2963
Poc1b	0.000168542	0.270516	0.254	0.196	1	1.29592
Wrn	0.00211896	0.291589	0.281	0.217	1	1.29493
Slc20a2	0.00535182	0.310968	0.29	0.224	1	1.29464
Orc2	1.49689e-05	0.270916	0.255	0.197	0.265219	1.29442
Homer2	0.000576109	0.291241	0.317	0.245	1	1.29388
Tpm4	0.00082446	0.253749	0.212	0.164	1	1.29268
Cep112	0.00315927	0.348296	0.301	0.233	1	1.29184
Lin52	0.00152454	0.316972	0.31	0.24	1	1.29167
Farp1	5.92501e-08	0.395764	0.528	0.409	0.00104979	1.29095
Asap1	1.47547e-17	0.491903	0.741	0.574	2.61424e-13	1.29094
St3gal4	0.000269899	0.256719	0.25	0.194	1	1.28866
Adk	2.7481e-11	0.420584	0.576	0.447	4.86908e-07	1.28859
Sclt1	2.7575e-08	0.388622	0.46	0.357	0.000488573	1.28852
Nr3c2	2.0388e-06	0.318986	0.46	0.357	0.0361235	1.28852
Frmd4b	3.20597e-45	0.744178	0.909	0.706	5.68034e-41	1.28754
Lyst	5.07286e-06	0.330395	0.39	0.303	0.0898809	1.28713
Ankrd44	1.64442e-12	0.385303	0.534	0.415	2.91358e-08	1.28675
Gria3	7.92473e-05	0.335769	0.459	0.357	1	1.28571
Ubap2	1.37236e-05	0.37002	0.466	0.363	0.243156	1.28375
Usp31	0.00705387	0.267279	0.268	0.209	1	1.2823
Irs1	8.44717e-09	0.399339	0.632	0.493	0.000149667	1.28195
Sp1	0.00336576	0.268378	0.291	0.227	1	1.28194
Nup205	0.0682581	0.305149	0.328	0.256	1	1.28125
Syne2	3.57736e-41	0.639759	0.848	0.662	6.33836e-37	1.28097
Slf2	4.97252e-05	0.329881	0.393	0.307	0.881032	1.28013
Ebf2	0.000207799	0.325544	0.422	0.33	1	1.27879
Stt3b	0.0177836	0.335431	0.423	0.331	1	1.27795
Crybg3	1.1172e-06	0.310497	0.345	0.27	0.0197945	1.27778
Smc3	3.28573e-07	0.396745	0.517	0.405	0.00582165	1.27654
Grid2	1.39942e-20	0.456782	0.865	0.678	2.4795e-16	1.27581
Dcaf1	1.90852e-07	0.34318	0.398	0.312	0.00338151	1.27564
Bahcc1	8.85121e-09	0.414287	0.622	0.488	0.000156826	1.27459
Tubb5	4.36535e-09	0.354686	0.434	0.341	7.73453e-05	1.27273
Ybx1	0.000762538	0.25289	0.271	0.213	1	1.2723
Papss1	0.00843505	0.271246	0.243	0.191	1	1.27225
Hnrnpul1	2.86506e-08	0.359683	0.482	0.379	0.000507631	1.27177
Sp3	0.000664753	0.310211	0.375	0.295	1	1.27119
Fosb	3.46239e-05	0.295069	0.367	0.289	0.613466	1.2699
Lpin2	1.42851e-07	0.320327	0.443	0.349	0.00253103	1.26934
Abr	1.91479e-06	0.262102	0.293	0.231	0.0339263	1.2684
Ttll4	0.000538099	0.290022	0.351	0.277	1	1.26715
Cerk	3.39495e-05	0.261235	0.304	0.24	0.601518	1.26667
Pvt1	1.99171e-05	0.276738	0.415	0.328	0.352891	1.26524
Egfem1	1.52416e-07	0.428859	0.578	0.457	0.0027005	1.26477
Ust	6.66391e-06	0.281009	0.607	0.48	0.118071	1.26458
Etf1	8.9504e-07	0.262262	0.292	0.231	0.0158583	1.26407
Slc10a7	3.39976e-05	0.373362	0.498	0.394	0.602369	1.26396
Thrap3	1.41842e-10	0.374005	0.551	0.436	2.51316e-06	1.26376
Msh3	0.198296	0.286144	0.298	0.236	1	1.26271
Psip1	1.27787e-10	0.343571	0.468	0.371	2.26412e-06	1.26146
Pam	0.00014931	0.311681	0.367	0.291	1	1.26117
Ssbp2	5.79692e-09	0.406327	0.682	0.541	0.00010271	1.26063
Actn4	0.00082693	0.267169	0.31	0.246	1	1.26016
Dlgap1	2.72457e-14	0.440563	0.729	0.579	4.8274e-10	1.25907
Stag2	9.34063e-10	0.400338	0.604	0.48	1.65497e-05	1.25833
Ptma	1.28582e-09	0.34057	0.449	0.357	2.27822e-05	1.2577
Zfp704	3.67013e-38	0.580192	0.841	0.669	6.50274e-34	1.2571
Pqlc1	0.0149986	0.259083	0.289	0.23	1	1.25652
Serbp1	2.91495e-09	0.352516	0.544	0.433	5.16471e-05	1.25635
Kpna3	8.91647e-06	0.303609	0.373	0.297	0.157982	1.25589
Rev1	9.15966e-06	0.315193	0.438	0.349	0.162291	1.25501
Xpo1	8.64451e-09	0.369349	0.606	0.483	0.000153163	1.25466
Atp13a3	3.66868e-10	0.324474	0.474	0.378	6.50017e-06	1.25397
Adgrl2	3.06077e-10	0.302115	0.491	0.392	5.42308e-06	1.25255
Elmsan1	0.127479	0.297656	0.309	0.247	1	1.25101
H2afy	9.46655e-09	0.317035	0.444	0.355	0.000167728	1.2507
Ppp4r3a	9.0559e-09	0.330024	0.416	0.333	0.000160452	1.24925
Brd3	0.000246013	0.314716	0.396	0.317	1	1.24921
Supt3	0.000535665	0.29735	0.361	0.289	1	1.24913
Rbms1	5.7227e-09	0.461861	0.685	0.549	0.000101395	1.24772
Dtnb	0.000852239	0.312645	0.368	0.295	1	1.24746
Rai14	9.1493e-05	0.287398	0.4	0.321	1	1.24611
Nucks1	1.26474e-07	0.276911	0.432	0.347	0.00224086	1.24496
Smarcc1	4.01019e-19	0.407243	0.68	0.547	7.10526e-15	1.24314
Nin	6.97238e-07	0.310698	0.513	0.413	0.0123537	1.24213
Brd8	1.02929e-05	0.329655	0.498	0.401	0.18237	1.24189
Mcmbp	0.00140534	0.284525	0.381	0.307	1	1.24104
Nrf1	4.72052e-08	0.334173	0.495	0.399	0.000836381	1.2406
Nsmce2	1.01128e-08	0.38929	0.604	0.487	0.000179178	1.24025
Rassf3	1.60676e-11	0.326664	0.663	0.535	2.84686e-07	1.23925
Xpo4	0.0505476	0.260407	0.359	0.29	1	1.23793
Sf1	7.63042e-06	0.315131	0.464	0.375	0.135196	1.23733
Taf15	8.12976e-08	0.360449	0.548	0.443	0.00144043	1.23702
Sin3a	0.670982	0.26132	0.32	0.259	1	1.23552
Grb10	6.35024e-06	0.252697	0.252	0.204	0.112514	1.23529
Tle4	0.000280557	0.335674	0.499	0.404	1	1.23515
Atrnl1	2.52085e-09	0.391843	0.652	0.528	4.46644e-05	1.23485
Ctcf	0.00509725	0.292076	0.406	0.329	1	1.23404
Prkd3	9.76408e-05	0.271869	0.381	0.309	1	1.23301
Ints7	0.23546	0.2665	0.373	0.303	1	1.23102
Ncl	5.64785e-12	0.379354	0.662	0.538	1.00069e-07	1.23048
Mpp7	5.95853e-08	0.295705	0.423	0.344	0.00105573	1.22965
Rnf144a	0.0109092	0.288574	0.371	0.302	1	1.22848
Dock11	2.20722e-07	0.337665	0.603	0.491	0.00391075	1.22811
Map3k3	5.37736e-05	0.279327	0.383	0.312	0.952761	1.22756
Emsy	2.66648e-06	0.310869	0.448	0.365	0.0472447	1.2274
Arhgap32	3.78156e-05	0.326273	0.486	0.396	0.670017	1.22727
Cdyl	0.00374813	0.25919	0.384	0.313	1	1.22684
Hectd2	0.00264996	0.250486	0.35	0.286	1	1.22378
Vcan	0.000437212	0.308488	0.472	0.386	1	1.2228
Atxn2l	4.53832e-05	0.310253	0.418	0.342	0.8041	1.22222
Cux1	2.57215e-20	0.535899	0.814	0.667	4.55733e-16	1.22039
Nap1l4	0.0421888	0.254778	0.363	0.298	1	1.21812
Lcorl	3.27518e-09	0.324705	0.57	0.468	5.80297e-05	1.21795
Dhx9	2.79183e-09	0.336669	0.635	0.522	4.94657e-05	1.21647
N4bp2	0.0047191	0.266797	0.377	0.31	1	1.21613
Tcerg1	8.59813e-09	0.339078	0.592	0.487	0.000152342	1.21561
Dock3	7.59343e-08	0.376613	0.661	0.544	0.0013454	1.21507
Scaf11	3.86197e-06	0.292134	0.452	0.372	0.0684264	1.21505
Elf2	7.03444e-08	0.268021	0.407	0.335	0.00124636	1.21493
Zhx3	0.0133389	0.291218	0.447	0.368	1	1.21467
Hnrnpr	1.08048e-09	0.306027	0.535	0.441	1.91439e-05	1.21315
Chd1	0.00153926	0.263651	0.393	0.324	1	1.21296
Mphosph8	0.000762012	0.251006	0.309	0.255	1	1.21176
Serinc5	6.11358e-06	0.272802	0.372	0.307	0.10832	1.21173
Asap2	1.18548e-07	0.283345	0.441	0.364	0.00210044	1.21154
Srrm1	8.81332e-06	0.328272	0.534	0.441	0.156154	1.21088
Rb1	9.56598e-08	0.302693	0.478	0.395	0.0016949	1.21013
Eif4g1	4.17625e-05	0.319113	0.611	0.505	0.739949	1.2099
Cnot6	0.00133905	0.275361	0.458	0.379	1	1.20844
Pcbp2	0.0258546	0.273273	0.447	0.37	1	1.20811
Znrf3	2.05912e-08	0.261489	0.516	0.428	0.000364835	1.20561
Dyrk1a	2.53162e-16	0.378273	0.659	0.547	4.48553e-12	1.20475
Cdk6	2.70375e-30	0.488204	0.924	0.767	4.7905e-26	1.20469
Ptch1	7.20371e-32	0.570866	0.943	0.783	1.27635e-27	1.20434
Pkn2	4.02818e-07	0.299285	0.478	0.397	0.00713713	1.20403
Srsf3	0.000391023	0.28088	0.462	0.384	1	1.20312
Pds5b	5.95772e-11	0.372182	0.712	0.592	1.05559e-06	1.2027
Memo1	4.53169e-05	0.29351	0.469	0.39	0.802924	1.20256
Ntn1	1.14253e-09	0.310534	0.787	0.655	2.02434e-05	1.20153
Matr3	1.56855e-06	0.331848	0.627	0.522	0.0277916	1.20115
Nalcn	1.01425e-09	0.388193	0.628	0.523	1.79705e-05	1.20076
Mad1l1	0.000575555	0.265429	0.359	0.299	1	1.20067
Dync2h1	2.27791e-07	0.283801	0.558	0.466	0.004036	1.19742
Hnrnpl	0.000634614	0.290287	0.455	0.38	1	1.19737
Rasal2	0.0129318	0.256113	0.504	0.421	1	1.19715
Fus	7.61184e-10	0.355492	0.705	0.589	1.34867e-05	1.19694
Hdgfl3	0.00102961	0.263749	0.456	0.381	1	1.19685
Ilf3	0.00786504	0.260816	0.447	0.374	1	1.19519
Sfrp1	2.63706e-09	0.254875	0.552	0.462	4.67234e-05	1.1948
Uhrf2	0.000152272	0.254111	0.571	0.478	1	1.19456
Mphosph9	0.0254267	0.304891	0.522	0.437	1	1.19451
Fancc	0.00368901	0.262567	0.394	0.33	1	1.19394
St3gal3	0.00108303	0.271602	0.433	0.363	1	1.19284
Chchd3	9.61164e-10	0.282686	0.547	0.459	1.70299e-05	1.19172
Eif3a	4.64029e-08	0.289835	0.586	0.493	0.000822166	1.18864
Syncrip	3.95234e-12	0.308936	0.615	0.519	7.00276e-08	1.18497
Wwox	1.42726e-06	0.341485	0.743	0.628	0.0252883	1.18312
Mast2	2.006e-05	0.291152	0.594	0.503	0.355424	1.18091
Tardbp	0.000676694	0.251212	0.458	0.388	1	1.18041
Faf1	8.03315e-06	0.305496	0.63	0.534	0.142331	1.17978
Hs3st5	5.89736e-31	0.531151	0.902	0.765	1.04489e-26	1.17908
Ddx39b	0.00606339	0.268152	0.482	0.409	1	1.17848
Atp11c	6.79317e-07	0.264017	0.605	0.514	0.0120361	1.17704
Bbx	2.30076e-05	0.263835	0.574	0.488	0.407649	1.17623
Adgrl1	0.0578774	0.264083	0.421	0.358	1	1.17598
Stag1	1.72222e-31	0.537869	0.879	0.749	3.05143e-27	1.17356
Trps1	8.266e-09	0.275985	0.68	0.58	0.000146457	1.17241
Rngtt	0.00422077	0.252501	0.497	0.425	1	1.16941
Tra2a	0.000799387	0.259453	0.512	0.438	1	1.16895
Pard3	1.14337e-08	0.292891	0.778	0.668	0.000202582	1.16467
Cadm1	3.66835e-13	0.343135	0.937	0.806	6.49959e-09	1.16253
Nkain3	0.00561655	0.250487	0.639	0.55	1	1.16182
Tiam1	0.000786063	0.273582	0.559	0.482	1	1.15975
Ncoa2	5.35995e-08	0.312475	0.701	0.605	0.000949675	1.15868
Cdkal1	2.32412e-06	0.275325	0.699	0.604	0.0411788	1.15728
Ncor2	1.37875e-13	0.294279	0.908	0.785	2.44287e-09	1.15669
Tead1	5.44371e-09	0.269529	0.786	0.681	9.64517e-05	1.15418
Foxp2	1.18524e-16	0.447349	0.922	0.799	2.10001e-12	1.15394
Sipa1l3	2.30419e-08	0.309285	0.768	0.666	0.000408257	1.15315
Ptprm	0.147989	-0.298714	0.261	0.227	1	1.14978
Pbrm1	1.00274e-06	0.284923	0.712	0.621	0.0177665	1.14654
Rims2	5.30377e-10	0.39517	0.874	0.763	9.39721e-06	1.14548
Exoc4	6.07271e-16	0.398046	0.862	0.754	1.07596e-11	1.14324
Lrrc7	5.46014e-48	0.606373	0.962	0.844	9.67427e-44	1.13981
Smyd3	0.000196198	0.25818	0.596	0.523	1	1.13958
Hnrnpu	2.23102e-13	0.319223	0.829	0.728	3.95293e-09	1.13874
Srek1	1.06464e-08	0.258029	0.654	0.575	0.000188633	1.13739
Gabrb3	0.00010853	0.259667	0.565	0.497	1	1.13682
Grip1	2.9353e-17	0.383202	0.925	0.814	5.20077e-13	1.13636
Phip	3.7282e-11	0.318927	0.854	0.752	6.60562e-07	1.13564
Cdh20	6.33558e-35	0.526154	0.989	0.871	1.12254e-30	1.13548
Ankrd11	2.55267e-10	0.31622	0.791	0.7	4.52282e-06	1.13
Hnrnpa2b1	8.54973e-08	0.301786	0.811	0.718	0.00151484	1.12953
Pbx3	4.62088e-13	0.321802	0.925	0.827	8.18728e-09	1.1185
Gm26917	0.000370288	0.327362	0.709	0.642	1	1.10436
Fam155a	2.4293e-21	0.505852	0.962	0.879	4.30424e-17	1.09443
Cadps2	0.523574	-0.516992	0.477	0.451	1	1.05765
Adgrb3	9.88439e-15	0.312205	0.987	0.935	1.75132e-10	1.05561
Xist	0.00397113	0.405552	0.447	0.424	1	1.05425
Ptprd	2.09739e-19	0.309303	0.99	0.951	3.71616e-15	1.04101
Plcb1	0.102381	-0.29788	0.751	0.725	1	1.03586
Trpm3	0.667966	-0.594233	0.224	0.217	1	1.03226
Ntm	0.0857696	-0.386805	0.677	0.656	1	1.03201
Erbb4	5.87228e-13	-0.574634	0.938	0.909	1.04045e-08	1.0319
Lsamp	9.51666e-07	-0.449768	0.951	0.923	0.0168616	1.03034
Ctnna2	0.00287841	-0.261701	0.909	0.883	1	1.02944
Kcnb2	0.000350743	-0.386829	0.804	0.782	1	1.02813
Cacna2d1	7.26538e-11	-0.310696	0.991	0.965	1.28728e-06	1.02694
Nrxn1	0.000154751	-0.289489	0.937	0.913	1	1.02629
Pde1c	0.000275026	-0.400705	0.873	0.856	1	1.01986
Grik2	2.44514e-07	-0.335653	0.959	0.941	0.0043323	1.01913
Celf2	1.11851e-20	-0.4823	0.976	0.959	1.98177e-16	1.01773
Astn2	4.15373e-06	-0.417182	0.888	0.882	0.0735959	1.0068
Ccser1	5.30317e-14	-0.41417	0.881	0.878	9.39616e-10	1.00342
Reln	4.5642e-13	-0.447866	0.881	0.879	8.08685e-09	1.00228
Frmd4a	1.92043e-06	-0.346066	0.839	0.84	0.0340262	0.998809
Gria4	9.54776e-14	-0.516675	0.845	0.849	1.69167e-09	0.995288
Nav1	5.97972e-07	-0.257081	0.853	0.858	0.0105949	0.994172
Nav2	6.28297e-27	-0.537863	0.947	0.954	1.11322e-22	0.992662
Pde4d	3.25462e-13	-0.672977	0.885	0.894	5.76654e-09	0.989933
Chd7	1.59917e-12	-0.310155	0.944	0.954	2.83342e-08	0.989518
Ank3	5.26136e-25	-0.533239	0.92	0.93	9.32208e-21	0.989247
Nol4	3.43679e-06	-0.272704	0.787	0.798	0.0608931	0.986215
Ank2	2.66238e-18	-0.52569	0.887	0.9	4.71721e-14	0.985555
Map2	2.3936e-12	-0.373503	0.829	0.843	4.24097e-08	0.983393
Nbea	0.000487647	-0.25901	0.833	0.848	1	0.982311
Nlgn1	8.27415e-09	-0.287565	0.831	0.849	0.000146601	0.978798
Rbfox3	2.10494e-27	-0.577232	0.862	0.882	3.72952e-23	0.977324
Tmem178b	0.000102264	-0.271276	0.784	0.808	1	0.970297
Nav3	5.37925e-08	-0.449511	0.735	0.761	0.000953095	0.965834
Prkcb	3.90253e-08	-0.375619	0.809	0.839	0.00069145	0.964243
Mir99ahg	5.73523e-14	-0.346962	0.855	0.887	1.01617e-09	0.963923
Zfp521	1.64928e-06	-0.497755	0.661	0.686	0.0292219	0.963557
Klhl29	7.06441e-05	-0.574523	0.592	0.616	1	0.961039
Foxp1	2.24631e-06	-0.268805	0.735	0.765	0.0398001	0.960784
Ttc3	9.00212e-11	-0.26127	0.777	0.811	1.59499e-06	0.958076
Kirrel3	0.739048	-0.497363	0.151	0.158	1	0.955696
Xkr4	0.00179958	-0.361438	0.642	0.675	1	0.951111
Jmjd1c	5.04592e-05	-0.264781	0.714	0.751	0.894037	0.950732
Adarb2	0.00176671	-0.413876	0.577	0.607	1	0.950576
Prkg1	0.439404	-0.459915	0.161	0.17	1	0.947058
Klf12	5.50308e-20	-0.474843	0.791	0.839	9.75036e-16	0.942789
Kcnip4	0.0689919	-0.333169	0.213	0.226	1	0.942477
Tjp1	0.525209	-0.288478	0.361	0.384	1	0.940104
Pcdh9	0.000129589	-0.789932	0.458	0.488	1	0.938524
Fmnl2	4.54938e-07	-0.367133	0.693	0.745	0.0080606	0.930201
Maml3	1.34831e-29	-0.564757	0.829	0.894	2.38893e-25	0.927293
Coro2b	0.0295178	-0.258742	0.611	0.661	1	0.924357
Edil3	9.89991e-06	-0.346803	0.605	0.655	0.175407	0.923664
Peli2	2.43603e-09	-0.341039	0.622	0.674	4.31616e-05	0.922849
Msi2	1.07325e-19	-0.452763	0.781	0.849	1.90159e-15	0.919906
Enox1	1.04187e-11	-0.529982	0.69	0.751	1.84599e-07	0.918775
Sox5	9.68177e-09	-0.424164	0.652	0.712	0.000171542	0.91573
Kif1b	1.87992e-15	-0.39262	0.714	0.78	3.33084e-11	0.915384
Srgap2	4.04807e-07	-0.44315	0.644	0.704	0.00717238	0.914773
Cask	3.64772e-06	-0.363232	0.583	0.639	0.0646303	0.912363
Sobp	3.54178e-08	-0.436869	0.673	0.738	0.000627532	0.911924
Zfpm2	8.15133e-12	-1.08624	0.645	0.708	1.44425e-07	0.911017
Pde4b	0.0191466	-0.418004	0.484	0.533	1	0.908067
Zfp608	0.0146037	-0.264103	0.57	0.628	1	0.907643
Heg1	3.77183e-06	-0.307146	0.573	0.632	0.0668293	0.906645
Nrcam	0.0215478	-0.366054	0.53	0.585	1	0.905983
Sh3gl2	0.00758231	-0.344185	0.509	0.562	1	0.905694
Basp1	0.01716	-0.308336	0.526	0.581	1	0.905335
Plekha6	7.71221e-07	-0.274973	0.516	0.571	0.0136645	0.903678
Kif5c	1.55994e-06	-0.355778	0.601	0.666	0.027639	0.902402
Syne1	0.105597	-0.432585	0.245	0.272	1	0.900735
Sox11	0.011239	-0.352181	0.5	0.556	1	0.89928
Itsn1	0.00107331	-0.250475	0.493	0.549	1	0.897996
Srrm4	4.67207e-14	-0.452968	0.636	0.711	8.27797e-10	0.894515
Fyn	4.0939e-06	-0.366346	0.513	0.576	0.0725357	0.890625
Miat	1.9753e-15	-0.590743	0.654	0.735	3.49984e-11	0.889796
Ror1	0.00497218	-0.265732	0.351	0.395	1	0.888607
Ptprs	2.30121e-28	-0.709807	0.708	0.799	4.07728e-24	0.886108
Plcl1	0.0537196	-0.369875	0.37	0.419	1	0.883055
Psd3	0.00029983	-0.380186	0.567	0.643	1	0.881804
Apc	4.10322e-25	-0.649551	0.699	0.794	7.27008e-21	0.880353
Trak1	4.71462e-06	-0.278663	0.476	0.542	0.0835336	0.878229
Nedd4l	2.77035e-20	-0.655431	0.712	0.811	4.90851e-16	0.877928
Klf7	0.0186768	-0.267375	0.496	0.565	1	0.877876
Mbd5	1.35433e-05	-0.294643	0.555	0.633	0.239961	0.876777
Gtdc1	0.00676092	-0.276197	0.487	0.559	1	0.871198
Hectd4	2.15888e-05	-0.270254	0.453	0.52	0.382511	0.871154
Anks1b	5.22489e-24	-0.764314	0.649	0.745	9.25746e-20	0.871141
Bcas3	0.00206691	-0.314668	0.516	0.593	1	0.870152
Sorbs1	5.40506e-08	-0.521628	0.535	0.615	0.000957669	0.869919
Soga1	1.39699e-08	-0.310088	0.469	0.541	0.000247519	0.866913
Gramd1b	1.59819e-19	-0.668071	0.67	0.774	2.83168e-15	0.865633
Atf7ip	4.1291e-07	-0.252763	0.42	0.487	0.00731593	0.862423
Pclo	0.000178125	-0.37946	0.402	0.468	1	0.858974
Fgf14	0.0309429	-1.00398	0.291	0.34	1	0.855882
Barhl1	2.52329e-09	-0.257769	0.343	0.401	4.47077e-05	0.855361
Sptbn1	3.64963e-06	-0.573353	0.471	0.551	0.0646641	0.854809
Kcnj3	4.73012e-05	-0.479688	0.464	0.544	0.838083	0.852941
Ephb2	1.20313e-08	-0.386838	0.475	0.557	0.000213171	0.852783
March1	2.27118e-10	-0.56974	0.5	0.587	4.02408e-06	0.851789
Slc39a11	0.000748764	-0.301857	0.404	0.478	1	0.845188
Gng2	7.6992e-08	-0.272379	0.392	0.464	0.00136414	0.844827
Ctif	1.46499e-08	-0.443829	0.506	0.6	0.000259567	0.843333
Rab3c	8.80028e-07	-0.346359	0.43	0.511	0.0155923	0.841487
Dscam	0.00170764	-0.539616	0.263	0.313	1	0.840255
Kalrn	8.64941e-06	-0.380623	0.461	0.549	0.15325	0.839708
Ssbp3	9.24318e-11	-0.391884	0.479	0.571	1.63771e-06	0.838879
Egfr	5.61861e-06	-0.435762	0.42	0.501	0.0995506	0.838323
Snap25	1.6263e-11	-0.44322	0.49	0.585	2.88148e-07	0.837607
Atp2b2	8.99694e-08	-0.335442	0.397	0.475	0.00159408	0.835789
Chd9	4.69667e-05	-0.273724	0.369	0.442	0.832156	0.834841
Myo1b	0.000245049	-0.313308	0.253	0.304	1	0.832237
Enox2	0.000144816	-0.318153	0.332	0.399	1	0.83208
Mbnl2	1.18215e-09	-0.424438	0.483	0.583	2.09453e-05	0.828473
Plppr1	5.56521e-11	-0.778503	0.516	0.623	9.86044e-07	0.82825
Stox2	1.40183e-05	-0.352291	0.453	0.547	0.248376	0.828153
Gm4258	5.68168e-08	-0.530869	0.501	0.606	0.00100668	0.826733
Ppm1l	0.00787525	-0.316679	0.394	0.477	1	0.825996
Aff4	0.000124193	-0.282999	0.393	0.476	1	0.82563
Plxna2	0.0445207	-0.380754	0.26	0.315	1	0.825397
Rps6ka3	4.99817e-05	-0.352769	0.335	0.407	0.885576	0.823096
Plxdc2	0.00168453	-0.431031	0.148	0.18	1	0.822222
Zswim6	1.96667e-06	-0.304361	0.397	0.483	0.0348455	0.821946
Brsk2	0.000568596	-0.279113	0.308	0.375	1	0.821333
Cald1	0.0434048	-0.336112	0.349	0.425	1	0.821176
Smarca2	3.0849e-06	-0.256118	0.265	0.323	0.0546583	0.820433
Ppp1r14c	5.98567e-06	-0.46349	0.322	0.393	0.106054	0.819338
Tmem2	0.00336195	-0.351085	0.33	0.403	1	0.818858
Cacna1c	2.97197e-07	-0.791873	0.39	0.478	0.00526573	0.815899
Senp7	1.95447e-05	-0.269785	0.349	0.428	0.346294	0.81542
Rasgef1b	7.84997e-16	-0.710603	0.503	0.618	1.39086e-11	0.813916
Rims1	1.33162e-08	-0.611118	0.419	0.515	0.000235937	0.813592
Slc24a3	0.00833222	-0.255755	0.187	0.23	1	0.813043
Cpe	0.00295659	-0.325046	0.387	0.476	1	0.813025
Exoc6b	2.22455e-09	-0.449153	0.493	0.607	3.94145e-05	0.812191
Scaper	0.00036641	-0.279936	0.333	0.411	1	0.810219
Clmp	2.24513e-08	-0.480348	0.39	0.482	0.000397792	0.809128
Leng8	0.000118022	-0.260808	0.305	0.377	1	0.809018
Hip1	4.70183e-05	-0.265966	0.258	0.32	0.83307	0.80625
Elavl3	7.14557e-10	-0.509305	0.493	0.613	1.26605e-05	0.804241
Ppfia2	1.36596e-22	-0.761773	0.531	0.662	2.4202e-18	0.802115
Slc4a4	0.00275374	-0.564588	0.125	0.156	1	0.801282
Tmeff1	2.06486e-07	-0.312348	0.325	0.407	0.00365851	0.798526
Sema6d	1.13098e-06	-0.567687	0.377	0.473	0.0200386	0.79704
Map1b	1.67747e-20	-0.708591	0.541	0.679	2.97214e-16	0.79676
Lhfpl3	0.164776	-1.07773	0.131	0.165	1	0.793939
Dixdc1	4.46727e-06	-0.253248	0.264	0.333	0.0791512	0.792793
Srrm3	0.000174052	-0.323356	0.317	0.4	1	0.7925
Eml5	0.000141122	-0.383649	0.352	0.445	1	0.791011
Tnik	3.73867e-40	-1.17465	0.607	0.768	6.62417e-36	0.790364
Ncam2	0.00322442	-0.449898	0.161	0.204	1	0.789215
Myo10	2.3362e-05	-0.439053	0.303	0.384	0.413927	0.789062
Cacna1b	6.48001e-08	-0.38059	0.351	0.446	0.00114813	0.786995
Astn1	7.19671e-10	-0.473529	0.413	0.525	1.27511e-05	0.786667
Tuba1a	4.21771e-07	-0.367896	0.331	0.421	0.00747294	0.786223
Sema6a	4.04097e-28	-0.926262	0.542	0.69	7.15979e-24	0.785507
Pde7b	0.517165	-0.264043	0.138	0.176	1	0.78409
Sh3kbp1	8.06946e-05	-0.303529	0.29	0.37	1	0.783784
Snapc3	0.00014849	-0.256873	0.247	0.316	1	0.781645
Syt11	1.62171e-06	-0.281205	0.264	0.338	0.0287335	0.781065
Obscn	6.58979e-05	-0.371384	0.178	0.228	1	0.780701
Abhd2	1.56364e-05	-0.32912	0.184	0.236	0.277047	0.779661
Mbp	0.00811624	-0.561792	0.173	0.222	1	0.779279
Unc13a	9.2746e-06	-0.276032	0.24	0.308	0.164327	0.779221
Arhgap26	2.76945e-07	-0.265906	0.155	0.199	0.00490691	0.778894
Mapk10	1.35074e-21	-0.657091	0.498	0.64	2.39325e-17	0.778125
Itpr2	0.199245	-0.334916	0.133	0.171	1	0.777777
Git2	2.33444e-10	-0.369657	0.339	0.436	4.13615e-06	0.777523
Ophn1	2.78107e-07	-0.357967	0.304	0.391	0.00492751	0.777493
Celf4	1.6322e-21	-0.975131	0.483	0.623	2.89193e-17	0.775281
Sptan1	1.31204e-07	-0.421459	0.364	0.47	0.00232468	0.774468
Bcas1	2.95741e-07	-0.518674	0.263	0.34	0.00523993	0.773529
Kcnd2	1.68746e-07	-1.08091	0.207	0.268	0.00298985	0.772388
Gpm6a	4.34553e-22	-0.799728	0.471	0.61	7.6994e-18	0.772131
Elavl4	1.52935e-11	-0.323279	0.274	0.355	2.7097e-07	0.771831
Tmtc2	8.86318e-14	-0.829153	0.465	0.603	1.57038e-09	0.771144
Bin1	1.04598e-09	-0.360933	0.307	0.4	1.85327e-05	0.7675
Sept3	1.31578e-13	-0.401014	0.294	0.384	2.33131e-09	0.765625
Hivep2	1.01283e-10	-0.579334	0.404	0.528	1.79454e-06	0.765151
Igfbpl1	5.57248e-07	-0.325293	0.254	0.332	0.00987331	0.76506
Nckap5l	2.49691e-06	-0.263707	0.206	0.27	0.0442402	0.762963
Dmxl2	7.91843e-06	-0.363519	0.313	0.411	0.140299	0.761557
Ldlrad4	6.66394e-09	-0.469593	0.357	0.469	0.000118072	0.761194
Csnk1g1	0.000867729	-0.357172	0.337	0.444	1	0.759009
Rtn1	1.96419e-09	-0.529819	0.41	0.541	3.48015e-05	0.757856
Unc79	7.39608e-06	-0.430492	0.35	0.462	0.131044	0.757576
St6gal1	9.31435e-07	-0.308573	0.258	0.341	0.0165032	0.756598
Zfp423	7.45636e-09	-0.665807	0.424	0.561	0.000132112	0.755793
Msra	3.37926e-14	-0.679423	0.371	0.492	5.98738e-10	0.754065
Atxn1	2.04272e-09	-0.386748	0.266	0.353	3.6193e-05	0.753541
Rnf150	2.66423e-08	-0.326104	0.24	0.319	0.000472049	0.752351
Mxi1	0.00157675	-0.347818	0.275	0.367	1	0.749319
Cadm2	3.1845e-21	-1.35594	0.421	0.562	5.6423e-17	0.74911
Kmt5b	4.81432e-07	-0.360434	0.286	0.382	0.00853	0.748691
Ntn4	0.00118207	-0.403907	0.298	0.399	1	0.746867
Scg5	2.33826e-05	-0.36854	0.28	0.376	0.414293	0.744681
Sgip1	6.59218e-11	-0.457435	0.341	0.458	1.168e-06	0.744541
Mtss1	8.77998e-22	-0.824403	0.448	0.603	1.55564e-17	0.742952
Anks1	2.29198e-07	-0.311082	0.252	0.34	0.00406094	0.741176
Camk2d	1.42223e-08	-0.545872	0.306	0.413	0.00025199	0.74092
Arhgef10l	1.61188e-12	-0.346927	0.257	0.348	2.85594e-08	0.738506
Parp8	0.000154065	-0.270695	0.186	0.252	1	0.738095
Synpr	2.39993e-08	-0.57367	0.263	0.357	0.00042522	0.736694
Gpcpd1	2.91337e-05	-0.451875	0.201	0.273	0.516191	0.736263
Zmynd8	6.37441e-09	-0.485018	0.353	0.481	0.000112942	0.733888
Ubl3	2.7709e-06	-0.287412	0.204	0.278	0.0490949	0.733813
H13	5.64254e-06	-0.297335	0.219	0.299	0.0999746	0.732441
Washc2	7.17149e-07	-0.282252	0.205	0.28	0.0127064	0.732143
Tenm1	2.9083e-05	-0.444038	0.167	0.229	0.515292	0.729257
Kcnc3	1.7511e-05	-0.297908	0.212	0.291	0.310259	0.728522
Ptpro	0.00226439	-0.299903	0.157	0.216	1	0.726852
Pak7	2.0417e-28	-0.85217	0.475	0.658	3.61749e-24	0.721884
Wnk2	1.09946e-08	-0.409717	0.277	0.384	0.000194803	0.721354
Afap1	6.83366e-12	-0.511894	0.327	0.454	1.21079e-07	0.720264
Klhl24	8.07382e-06	-0.3019	0.21	0.292	0.143052	0.719178
Ago1	8.98735e-10	-0.278252	0.184	0.256	1.59238e-05	0.71875
Zfhx2os	1.05525e-05	-0.334276	0.212	0.295	0.18697	0.718644
Apba1	3.17765e-12	-0.587635	0.309	0.43	5.63015e-08	0.718604
Elmo1	3.97296e-10	-0.808886	0.316	0.44	7.03929e-06	0.718182
Grk3	3.9463e-09	-0.319059	0.196	0.273	6.99205e-05	0.717948
Myo18a	0.000129319	-0.272914	0.187	0.261	1	0.716475
Susd6	0.00816186	-0.307276	0.192	0.268	1	0.716418
Fam107b	0.000235296	-0.285916	0.173	0.242	1	0.714876
Osbpl9	1.99302e-08	-0.383598	0.264	0.37	0.000353122	0.713513
Dlg2	3.69147e-09	-0.671625	0.246	0.345	6.54055e-05	0.713043
Agpat4	1.53702e-05	-0.280501	0.188	0.264	0.27233	0.712121
Ube2h	2.11703e-06	-0.399517	0.264	0.371	0.0375096	0.71159
Rsrp1	0.000648085	-0.27988	0.205	0.289	1	0.709342
Xkr6	1.32028e-17	-0.570592	0.321	0.453	2.33927e-13	0.708609
Stard13	0.0223761	-0.382502	0.111	0.157	1	0.707006
Rmst	7.40016e-07	-0.406153	0.195	0.276	0.0131116	0.706521
Extl3	0.00158076	-0.268336	0.155	0.22	1	0.704545
Atp6v0a1	6.05483e-08	-0.35295	0.236	0.335	0.00107279	0.704477
Gm3764	2.36744e-07	-0.409747	0.228	0.324	0.00419464	0.703703
Tmsb4x	0.0434617	-0.261671	0.147	0.209	1	0.703349
Clip2	2.87255e-06	-0.288359	0.192	0.273	0.0508958	0.703296
Tsga10	2.80445e-06	-0.259	0.154	0.219	0.0496892	0.703196
Podxl2	8.44296e-05	-0.331921	0.191	0.272	1	0.702206
Opcml	2.99532e-09	-1.38709	0.332	0.475	5.30711e-05	0.698947
Stxbp5l	6.79532e-22	-0.81443	0.352	0.504	1.20399e-17	0.698413
Crebrf	2.27052e-09	-0.30761	0.199	0.285	4.02291e-05	0.698245
Kif1a	8.7187e-07	-0.438623	0.27	0.388	0.0154478	0.695876
Syngap1	9.96756e-06	-0.264411	0.157	0.226	0.176605	0.69469
Dner	1.30131e-11	-0.60776	0.316	0.456	2.30567e-07	0.692982
St18	1.61167e-17	-0.825932	0.356	0.514	2.85555e-13	0.692607
Arid5b	9.53539e-07	-0.273592	0.122	0.177	0.0168948	0.689265
Schip1	8.01799e-10	-0.434353	0.218	0.317	1.42063e-05	0.687697
Gm37013	5.20218e-05	-0.255961	0.145	0.211	0.921722	0.687203
Mgat4c	8.88513e-07	-0.563823	0.202	0.294	0.0157427	0.687075
Fnbp1	1.50884e-07	-0.47005	0.218	0.318	0.00267336	0.685534
Slc17a6	4.03425e-08	-0.546837	0.285	0.417	0.000714788	0.683453
Dpysl5	1.71936e-09	-0.415907	0.219	0.321	3.04637e-05	0.682243
Rab30	7.51351e-09	-0.371092	0.206	0.302	0.000133124	0.682119
Slc44a1	8.69652e-10	-0.424187	0.221	0.324	1.54085e-05	0.682099
Tmem63b	1.03361e-08	-0.389871	0.222	0.327	0.000183135	0.678899
Park2	1.99091e-11	-0.541723	0.264	0.389	3.52749e-07	0.678663
Clvs1	4.32627e-16	-0.791738	0.346	0.511	7.66528e-12	0.677104
Dscaml1	4.60654e-23	-0.975908	0.4	0.591	8.16186e-19	0.676819
Rundc3a	2.74071e-06	-0.258898	0.129	0.191	0.0485599	0.675392
Atxn7l1	0.00627766	-0.290858	0.156	0.231	1	0.675324
Clip3	9.11299e-10	-0.294135	0.155	0.23	1.61464e-05	0.673913
Fam117b	0.000261182	-0.280912	0.157	0.233	1	0.673819
Gm20696	1.26035e-14	-0.65168	0.306	0.455	2.23308e-10	0.672527
Pdcd4	1.66514e-05	-0.379789	0.205	0.305	0.295029	0.672131
Myt1l	2.9645e-10	-0.733169	0.307	0.459	5.25249e-06	0.668845
Gm9801	9.94984e-09	-0.440301	0.224	0.336	0.000176291	0.666666
Rcor2	6.81508e-10	-0.353722	0.161	0.242	1.2075e-05	0.665289
Cpeb4	0.00152723	-0.299675	0.161	0.242	1	0.665289
Sphkap	1.32761e-08	-0.646104	0.246	0.37	0.000235225	0.664865
Stard9	4.83497e-09	-0.422926	0.214	0.322	8.56659e-05	0.664596
Atl1	6.84477e-07	-0.281306	0.142	0.214	0.0121276	0.663551
Arhgap44	4.56328e-10	-0.296039	0.153	0.231	8.08522e-06	0.662337
Dcx	1.09808e-24	-0.861055	0.376	0.568	1.94558e-20	0.661972
Rai2	0.00254376	-0.28498	0.133	0.201	1	0.661691
Kcnq2	0.000451832	-0.367787	0.183	0.277	1	0.66065
Ralgds	1.28764e-05	-0.291379	0.138	0.209	0.228145	0.660287
Ttbk1	0.000112702	-0.268037	0.134	0.203	1	0.660098
Fam219a	0.000339483	-0.271668	0.13	0.197	1	0.659898
Nrn1	1.26757e-06	-0.359224	0.161	0.244	0.0224588	0.659836
Nova2	5.939e-09	-0.532018	0.261	0.397	0.000105227	0.657431
Tcte2	0.000102073	-0.338483	0.154	0.235	1	0.655319
Efr3b	9.68407e-07	-0.405772	0.18	0.277	0.0171582	0.649819
Trpc4ap	3.11792e-07	-0.325807	0.159	0.246	0.00552433	0.646341
Kcnk10	6.83449e-06	-0.311943	0.137	0.212	0.121093	0.646226
Tspoap1	5.22726e-06	-0.350196	0.167	0.259	0.0926167	0.644787
Crtc3	4.80056e-08	-0.34264	0.165	0.256	0.000850563	0.644531
Chst11	0.000167651	-0.369548	0.116	0.18	1	0.644444
Kcnj6	2.31823e-19	-0.959044	0.331	0.514	4.10744e-15	0.643969
Stxbp1	3.96395e-13	-0.493673	0.225	0.351	7.02332e-09	0.641025
Glce	4.4734e-13	-0.756777	0.266	0.417	7.92597e-09	0.63789
Nhlh2	1.36287e-06	-0.414086	0.172	0.27	0.0241473	0.637037
Pik3r3	4.30886e-18	-0.689116	0.294	0.462	7.63444e-14	0.636363
Wdr47	6.69422e-05	-0.267265	0.117	0.184	1	0.635869
Aig1	3.81419e-08	-0.432005	0.178	0.28	0.000675798	0.635714
Mcf2l	5.71996e-05	-0.392496	0.15	0.236	1	0.635593
Ina	0.0119945	-0.296619	0.119	0.188	1	0.632978
Gm20125	0.000144596	-0.340748	0.13	0.206	1	0.631068
Gap43	8.57771e-08	-0.594652	0.218	0.347	0.0015198	0.628242
L3mbtl4	4.64437e-08	-0.418795	0.13	0.207	0.000822889	0.628019
Dlgap4	5.15649e-08	-0.479669	0.22	0.351	0.000913627	0.62678
Ypel2	2.4902e-08	-0.32909	0.131	0.21	0.000441213	0.623809
Itm2b	3.19933e-05	-0.315012	0.129	0.207	0.566857	0.623188
Uncx	2.52668e-07	-0.395966	0.157	0.252	0.00447677	0.623016
Lrrtm3	6.07822e-09	-0.535052	0.109	0.175	0.000107694	0.622857
Ankrd13a	0.000748209	-0.273086	0.115	0.185	1	0.621621
Luzp2	0.000194249	-0.628752	0.153	0.247	1	0.619433
Gm20687	1.46539e-07	-0.357581	0.135	0.218	0.00259638	0.619266
Vash1	1.23482e-05	-0.256986	0.112	0.181	0.218785	0.618784
Plxna3	4.16582e-05	-0.305791	0.12	0.194	0.7381	0.618556
Snhg14	2.04148e-15	-0.742753	0.248	0.401	3.61709e-11	0.618454
Tacc2	1.02836e-08	-0.32445	0.135	0.219	0.000182205	0.616438
Lmtk3	0.000208375	-0.259939	0.1	0.163	1	0.613497
Nrg1	2.26758e-23	-1.42496	0.306	0.5	4.01769e-19	0.612
Pitpnc1	8.66626e-13	-0.634824	0.226	0.37	1.53549e-08	0.610811
Kif3c	3.75004e-10	-0.27602	0.11	0.181	6.64433e-06	0.607734
Adcy5	3.42226e-09	-0.438463	0.159	0.262	6.06357e-05	0.60687
Fbxl20	1.65664e-13	-0.484142	0.205	0.338	2.93524e-09	0.606509
Inpp4a	4.86919e-07	-0.344951	0.134	0.221	0.00862724	0.606335
Rab6b	5.78309e-18	-0.717174	0.274	0.453	1.02465e-13	0.604856
Evi5l	8.8553e-09	-0.25531	0.101	0.167	0.000156898	0.60479
Pcmtd2	1.71447e-05	-0.344279	0.125	0.207	0.303769	0.603864
Cacnb4	1.93307e-10	-0.510284	0.157	0.26	3.42501e-06	0.603846
Rapgef4	7.70503e-08	-0.465788	0.112	0.186	0.00136518	0.60215
Ndst3	2.71572e-12	-0.710788	0.159	0.265	4.81171e-08	0.6
Dbn1	7.96534e-06	-0.362576	0.13	0.217	0.14113	0.599078
Chrm3	1.49715e-06	-0.445291	0.101	0.169	0.0265266	0.597633
Kidins220	1.09427e-12	-0.617195	0.239	0.402	1.93882e-08	0.594527
Ankrd12	1.54977e-12	-0.514638	0.2	0.337	2.74589e-08	0.593472
Nmnat2	1.15351e-09	-0.537022	0.191	0.323	2.0438e-05	0.591331
Adcy9	0.000303052	-0.259113	0.088	0.15	1	0.586666
Arpp21	6.10841e-21	-1.46633	0.257	0.441	1.08229e-16	0.582766
Cyth1	8.62756e-05	-0.325765	0.113	0.194	1	0.582474
Dock9	7.43681e-05	-0.552105	0.096	0.165	1	0.581818
Ckb	1.08995e-08	-0.381177	0.119	0.205	0.000193117	0.580488
Ano4	1.76778e-13	-0.519923	0.143	0.248	3.13216e-09	0.576613
March3	6.01971e-07	-0.44249	0.125	0.217	0.0106657	0.576037
Tenm2	6.67879e-13	-0.627784	0.148	0.257	1.18335e-08	0.575875
Tubb2b	0.00029829	-0.285138	0.092	0.16	1	0.575
Nkain1	3.30032e-15	-0.51158	0.162	0.282	5.8475e-11	0.574468
Hcn1	0.000870176	-0.427687	0.095	0.166	1	0.572289
Taok3	2.22026e-05	-0.302668	0.097	0.17	0.393386	0.570588
Rps6ka2	1.32086e-12	-0.381728	0.126	0.222	2.3403e-08	0.567567
Dtna	1.58527e-11	-0.525766	0.135	0.238	2.80879e-07	0.567227
Pik3c2b	1.07304e-06	-0.261801	0.085	0.15	0.0190121	0.566666
Mindy2	2.82649e-05	-0.283932	0.086	0.152	0.500798	0.565789
Hivep3	3.33977e-17	-1.08865	0.237	0.421	5.9174e-13	0.562945
Fam214a	7.41901e-11	-0.447008	0.132	0.236	1.3145e-06	0.559322
Thra	2.94976e-09	-0.433699	0.137	0.245	5.22638e-05	0.559183
Cpeb3	2.12296e-09	-0.403329	0.123	0.22	3.76146e-05	0.559091
Kdm6b	7.78305e-12	-0.599023	0.193	0.346	1.379e-07	0.557803
Hip1r	6.75513e-11	-0.305713	0.09	0.162	1.19687e-06	0.555555
Plppr3	1.60128e-06	-0.343557	0.102	0.184	0.0283714	0.554348
Acadsb	3.17039e-10	-0.312209	0.093	0.169	5.6173e-06	0.550296
Grin2b	5.37069e-26	-1.30926	0.25	0.456	9.51579e-22	0.548245
Brinp1	3.75848e-11	-0.576085	0.137	0.25	6.65927e-07	0.548
Gpr158	2.99773e-15	-0.835923	0.206	0.377	5.31137e-11	0.546419
Prdm8	2.20941e-07	-0.319018	0.086	0.158	0.00391463	0.544303
Pcdha11	5.77464e-10	-0.459334	0.124	0.228	1.02315e-05	0.543859
Igsf21	1.16467e-22	-0.813799	0.212	0.394	2.06357e-18	0.538071
Mapk4	1.8323e-07	-0.471154	0.111	0.207	0.00324647	0.536232
Camk4	1.92203e-05	-0.554104	0.088	0.165	0.340546	0.533333
Lingo1	5.52498e-10	-0.359183	0.087	0.164	9.78916e-06	0.530487
Nrep	4.11591e-15	-0.543039	0.152	0.287	7.29258e-11	0.529617
Nhlh1	2.73519e-05	-0.374937	0.092	0.174	0.484622	0.528735
Tanc2	3.18158e-09	-0.46012	0.078	0.151	5.63712e-05	0.516556
Kcnd3	1.68396e-06	-0.479251	0.079	0.153	0.0298364	0.51634
Ppp2r2b	6.08969e-18	-1.08714	0.186	0.361	1.07897e-13	0.515235
Cyfip2	3.06093e-12	-0.49011	0.101	0.198	5.42335e-08	0.510101
Adarb1	7.24317e-10	-0.408824	0.101	0.199	1.28335e-05	0.507537
Pou2f2	3.93391e-12	-0.463247	0.106	0.209	6.9701e-08	0.507177
Snap91	2.93084e-13	-0.509585	0.117	0.232	5.19287e-09	0.50431
Neurod1	1.25494e-16	-0.879759	0.17	0.341	2.2235e-12	0.498534
Fbxo32	1.98753e-08	-0.355541	0.076	0.154	0.00035215	0.493506
Ncan	1.35338e-10	-0.414878	0.092	0.187	2.39793e-06	0.491978
Sorbs2	2.06199e-09	-0.68067	0.101	0.206	3.65343e-05	0.490291
Celf3	3.4483e-15	-0.547128	0.12	0.246	6.1097e-11	0.487805
Scrt2	3.88039e-10	-0.435698	0.096	0.197	6.87528e-06	0.487309
Kcnk1	9.5731e-13	-0.355368	0.076	0.156	1.69616e-08	0.487179
Map6	4.91054e-13	-0.472543	0.104	0.214	8.70049e-09	0.485981
Epb41l4a	1.88775e-11	-0.463867	0.091	0.188	3.34471e-07	0.484042
Cadm3	1.51569e-22	-0.879175	0.177	0.367	2.68549e-18	0.482289
Dopey2	3.01415e-15	-0.496436	0.112	0.233	5.34048e-11	0.480686
Nrxn2	1.21789e-15	-0.682212	0.143	0.299	2.15786e-11	0.478261
Syn3	1.40522e-15	-0.95548	0.146	0.306	2.48977e-11	0.477124
Stmn4	1.67737e-09	-0.396671	0.08	0.169	2.97197e-05	0.473373
Cacna1e	4.32734e-25	-1.31922	0.155	0.329	7.66718e-21	0.471124
Samd12	5.59578e-38	-1.4645	0.214	0.457	9.91461e-34	0.468271
Cntnap4	6.82492e-10	-0.657682	0.104	0.223	1.20924e-05	0.466368
Mapt	4.55012e-14	-0.61534	0.121	0.26	8.06191e-10	0.465384
Lrp1b	4.43522e-12	-1.38272	0.105	0.226	7.85832e-08	0.464602
Dnajc6	2.38043e-12	-0.381772	0.07	0.151	4.21764e-08	0.463576
Map3k13	5.97509e-15	-0.729912	0.142	0.307	1.05867e-10	0.462541
Unc5d	4.3918e-16	-0.93814	0.108	0.236	7.78139e-12	0.457627
Kif5a	2.9315e-12	-0.58151	0.112	0.245	5.19404e-08	0.457143
Ppm1h	9.40906e-31	-1.11323	0.175	0.384	1.6671e-26	0.455729
Epb41l1	2.53666e-21	-0.857921	0.131	0.289	4.49445e-17	0.453287
Sgsm1	6.61522e-11	-0.422023	0.076	0.168	1.17208e-06	0.452381
Atp9a	6.6563e-09	-0.435278	0.081	0.18	0.000117936	0.45
Syp	6.47846e-11	-0.38624	0.069	0.155	1.14785e-06	0.445161
Cntn2	8.72946e-60	-1.74655	0.245	0.554	1.54669e-55	0.442238
Atp8a2	6.00774e-10	-0.439163	0.072	0.163	1.06445e-05	0.441718
Kif21b	4.26683e-23	-0.661633	0.118	0.269	7.55997e-19	0.438662
Lzts1	1.63738e-16	-0.666077	0.107	0.246	2.90111e-12	0.434959
Prickle2	1.28416e-15	-0.772111	0.102	0.236	2.27528e-11	0.432203
Unc5c	3.93484e-20	-1.43297	0.127	0.296	6.97175e-16	0.429054
Gm31409	1.95203e-14	-0.482284	0.076	0.179	3.45861e-10	0.424581
Stmn2	6.45656e-21	-0.872318	0.14	0.331	1.14397e-16	0.422961
Cacna1a	2.46685e-23	-1.14304	0.142	0.339	4.37077e-19	0.418879
Myt1	3.72907e-36	-1.00715	0.161	0.388	6.60716e-32	0.414948
Kdm7a	6.67376e-22	-0.684262	0.116	0.28	1.18246e-17	0.414286
Kdm5b	5.21512e-33	-0.874086	0.148	0.365	9.24015e-29	0.405479
Srgap3	4.97562e-41	-1.25322	0.178	0.439	8.81581e-37	0.405467
Car10	1.84858e-18	-1.40391	0.091	0.225	3.27531e-14	0.404444
Chd3	5.47861e-12	-0.437183	0.066	0.164	9.707e-08	0.402439
Spock1	1.19039e-10	-0.687417	0.063	0.157	2.10914e-06	0.401274
Lrp1	2.97605e-20	-0.703577	0.091	0.231	5.27296e-16	0.393939
Syt1	1.4442e-22	-0.819215	0.082	0.209	2.55883e-18	0.392344
Mmp24	9.99679e-22	-0.75985	0.104	0.266	1.77123e-17	0.390977
Mir124a-1hg	9.12004e-34	-0.985354	0.134	0.351	1.61589e-29	0.381766
Phactr3	2.8778e-14	-0.4848	0.06	0.158	5.09889e-10	0.379747
Nrxn3	6.55491e-29	-1.59234	0.118	0.311	1.1614e-24	0.379421
Cntn1	6.09283e-16	-0.859748	0.077	0.208	1.07953e-11	0.370192
Nyap2	1.42637e-24	-0.838079	0.102	0.278	2.52724e-20	0.366906
Ntrk2	7.81325e-22	-0.896915	0.089	0.248	1.38435e-17	0.358871
Dpysl3	8.52784e-15	-0.652313	0.076	0.213	1.51096e-10	0.356807
Nfasc	3.61227e-25	-1.21083	0.109	0.306	6.40021e-21	0.356209
Pdzrn3	1.48514e-19	-0.812553	0.079	0.234	2.63137e-15	0.337607
Ryr2	1.39733e-16	-0.98227	0.063	0.193	2.47579e-12	0.326425
Lrrc4c	5.20828e-23	-1.52966	0.07	0.222	9.22803e-19	0.315315
Zmat4	4.21304e-20	-0.847421	0.052	0.173	7.46466e-16	0.300578
Srcin1	5.40152e-22	-0.679098	0.059	0.197	9.57041e-18	0.299492
Apc2	2.61376e-16	-0.590208	0.054	0.181	4.63106e-12	0.298342
Adamtsl3	3.61859e-21	-0.908597	0.06	0.215	6.41142e-17	0.27907
Gabbr2	3.67893e-19	-0.875571	0.053	0.201	6.51833e-15	0.263681
Nol4l	5.5503e-28	-0.662431	0.046	0.181	9.83403e-24	0.254144
Ephb1	2.57995e-31	-1.52755	0.073	0.293	4.57116e-27	0.249147
Wscd2	1.1408e-24	-0.774199	0.046	0.191	2.02127e-20	0.240838
Grm1	1.56427e-19	-0.993219	0.032	0.162	2.77157e-15	0.197531

## Sheet: cluster 1
gene	p_val	avg_log2FC	fraction + in cluster	fraction + not in cluster	p_val_adj	ratio + in:out of cluster
Pif1	2.70001e-84	1.16994	0.349	0.035	4.78388e-80	9.9714
Psrc1	1.23613e-28	0.560773	0.158	0.019	2.19017e-24	8.31575
Cenpa	2.27659e-96	1.36948	0.444	0.058	4.03366e-92	7.65516
Plk1	1.72794e-45	0.77867	0.236	0.033	3.06157e-41	7.15149
Ube2c	3.2056e-39	0.719549	0.214	0.03	5.67968e-35	7.13331
Troap	2.5063e-69	1.18929	0.384	0.054	4.44067e-65	7.1111
Cdc25c	9.15459e-58	1.01041	0.317	0.045	1.62201e-53	7.04443
Ccnb1	1.30032e-55	1.00911	0.315	0.045	2.3039e-51	6.99998
Gas2l3	7.01704e-77	1.19952	0.387	0.058	1.24328e-72	6.6724
Cdc20	1.5797e-35	0.669747	0.201	0.031	2.7989e-31	6.48385
Hmmr	1.00647e-114	1.51418	0.53	0.083	1.78326e-110	6.38553
Nek2	1.98861e-47	0.799577	0.253	0.04	3.52342e-43	6.32498
Aurka	1.25465e-42	0.773457	0.239	0.038	2.22299e-38	6.28946
Kpna2	9.45517e-72	1.17708	0.399	0.066	1.67527e-67	6.04545
Depdc1a	2.58775e-60	1.07985	0.352	0.059	4.58498e-56	5.96609
Kif14	4.28419e-109	1.53986	0.557	0.096	7.59073e-105	5.80208
Dlgap5	1.56454e-82	1.29316	0.449	0.078	2.77205e-78	5.7564
Parpbp	1.27806e-78	1.20743	0.402	0.07	2.26447e-74	5.74285
Gtse1	4.63839e-30	0.534119	0.169	0.03	8.2183e-26	5.63331
Kif2c	1.35017e-54	0.977377	0.32	0.057	2.39224e-50	5.61403
Cep55	4.55519e-50	0.969632	0.325	0.06	8.07089e-46	5.41666
Knstrn	4.71866e-81	1.21175	0.431	0.08	8.36053e-77	5.38749
Prc1	1.05998e-128	1.65559	0.624	0.116	1.87807e-124	5.37931
Arhgap19	2.13736e-31	0.565137	0.177	0.033	3.78697e-27	5.36362
Depdc1b	2.95446e-98	1.34301	0.486	0.091	5.23471e-94	5.34065
Kif18b	1.5113e-86	1.28743	0.472	0.089	2.67773e-82	5.30336
Kifc5b	1.10224e-31	0.670104	0.215	0.041	1.95294e-27	5.24389
Ccnf	1.26213e-90	1.30739	0.476	0.092	2.23623e-86	5.17391
Kifc1	3.5021e-46	0.850772	0.282	0.055	6.20502e-42	5.12726
Kif20a	4.50985e-31	0.652383	0.21	0.041	7.99056e-27	5.12194
Cenpl	1.08285e-24	0.542307	0.169	0.033	1.91859e-20	5.1212
Neurl1b	5.12401e-30	0.7593	0.244	0.048	9.07873e-26	5.08332
Sgo2a	2.57596e-80	1.21739	0.449	0.089	4.56408e-76	5.04494
Mis18bp1	2.43302e-140	1.69946	0.651	0.13	4.31083e-136	5.00769
Kif23	4.95653e-126	1.68575	0.639	0.128	8.78198e-122	4.99218
Spdl1	7.19364e-32	0.60141	0.194	0.039	1.27457e-27	4.97435
Cep89	1.1746e-58	1.20643	0.389	0.079	2.08116e-54	4.92404
Prr11	2.13784e-61	1.06467	0.383	0.078	3.78783e-57	4.91025
Cks2	1.8506e-11	0.481572	0.153	0.032	3.27889e-07	4.78124
Arhgap11a	1.05771e-74	1.25328	0.482	0.102	1.87404e-70	4.72549
Bub1b	2.11711e-80	1.26272	0.488	0.104	3.75109e-76	4.6923
Bora	4.48071e-82	1.38178	0.512	0.11	7.93893e-78	4.65454
Kif22	5.52175e-60	1.04166	0.385	0.084	9.78343e-56	4.58333
Ankle1	5.03249e-34	0.613571	0.201	0.044	8.91657e-30	4.56817
Ect2	4.66936e-130	1.65322	0.665	0.147	8.27318e-126	4.52381
Cdc25b	5.22159e-33	0.616239	0.211	0.047	9.25161e-29	4.48935
Tpx2	2.7443e-146	1.71999	0.708	0.159	4.86235e-142	4.45283
Cdk1	9.30248e-66	1.05923	0.399	0.09	1.64821e-61	4.43333
Kif18a	7.1171e-109	1.49709	0.604	0.137	1.26101e-104	4.40876
Cdca2	2.38166e-120	1.59382	0.664	0.151	4.21983e-116	4.39735
Sgo1	1.7608e-45	0.869749	0.312	0.071	3.11979e-41	4.39436
Nusap1	7.09137e-82	1.227	0.474	0.108	1.25645e-77	4.38888
Ckap2	5.83657e-84	1.19111	0.469	0.108	1.03412e-79	4.34259
Aspm	2.44079e-216	2.31283	0.851	0.196	4.32458e-212	4.34183
Espl1	2.9817e-48	0.93212	0.357	0.083	5.28297e-44	4.3012
Ckap2l	2.50456e-69	1.19227	0.467	0.109	4.43758e-65	4.2844
Cdca8	1.89255e-43	0.737059	0.271	0.064	3.35322e-39	4.23437
Ska1	2.19115e-21	0.493042	0.16	0.038	3.88229e-17	4.21052
Smtn	7.84497e-25	0.502375	0.181	0.043	1.38997e-20	4.20929
Ccna2	6.46986e-39	0.817821	0.3	0.072	1.14633e-34	4.16666
Spc25	7.42344e-34	0.686751	0.245	0.059	1.31528e-29	4.15254
Tacc3	3.34792e-76	1.1986	0.477	0.115	5.93185e-72	4.14782
Aurkb	8.60131e-32	0.792958	0.286	0.069	1.52398e-27	4.14492
Miip	6.61178e-25	0.467993	0.165	0.04	1.17147e-20	4.12499
Anln	1.21722e-106	1.44066	0.611	0.15	2.15667e-102	4.07333
Ska3	4.99102e-29	0.553868	0.194	0.048	8.84309e-25	4.04166
Rtkn2	1.87779e-61	1.05014	0.396	0.098	3.32707e-57	4.04081
Hyls1	2.12072e-21	0.465602	0.155	0.039	3.75749e-17	3.97435
Ttk	2.25606e-69	1.09748	0.444	0.112	3.99728e-65	3.96428
Cenpf	1.02327e-192	2.17129	0.834	0.211	1.81303e-188	3.9526
Kif4	4.69679e-123	1.51096	0.664	0.168	8.32178e-119	3.95238
Birc5	1.62302e-20	0.543355	0.189	0.048	2.87567e-16	3.93749
Kif20b	6.45521e-160	1.80472	0.763	0.194	1.14373e-155	3.93299
Spag5	1.59574e-60	1.01683	0.405	0.103	2.82734e-56	3.93204
Arhgap18	7.57514e-22	0.531098	0.191	0.049	1.34216e-17	3.89795
Bub1	2.09741e-64	1.09849	0.471	0.123	3.71619e-60	3.82927
Cenpe	9.79978e-201	2.14762	0.863	0.226	1.73633e-196	3.81858
Nuf2	9.76139e-43	0.866828	0.35	0.093	1.72952e-38	3.76344
Dbf4	1.56383e-56	0.941213	0.376	0.1	2.77079e-52	3.76
Ndc80	1.07548e-56	0.979555	0.394	0.105	1.90553e-52	3.75238
Iqgap3	3.5191e-43	0.900837	0.347	0.093	6.23514e-39	3.73118
Nde1	3.62602e-36	0.731228	0.283	0.076	6.42458e-32	3.72368
Lockd	8.09213e-70	1.1637	0.487	0.132	1.43376e-65	3.68939
Ncapg	2.30476e-60	1.10397	0.48	0.135	4.08358e-56	3.55555
Kif11	4.15334e-158	1.73565	0.815	0.23	7.35889e-154	3.54348
Trim59	1.93363e-27	0.571151	0.219	0.062	3.42601e-23	3.53225
Incenp	3.80247e-91	1.32094	0.603	0.171	6.73721e-87	3.52631
Shcbp1	2.86758e-35	0.711029	0.28	0.081	5.08078e-31	3.45679
Knl1	7.29138e-154	1.70371	0.808	0.236	1.29189e-149	3.42373
Foxm1	6.417e-44	0.773287	0.324	0.095	1.13696e-39	3.41052
Efcab11	1.49941e-90	1.39339	0.612	0.18	2.65665e-86	3.4
Arl6ip1	9.91791e-89	1.36274	0.567	0.169	1.75726e-84	3.35503
Gen1	1.42915e-23	0.521824	0.201	0.06	2.53216e-19	3.34999
Chek2	1.69032e-21	0.569996	0.217	0.065	2.99491e-17	3.33846
Mastl	1.33179e-34	0.792573	0.324	0.099	2.35966e-30	3.27272
Ccdc18	1.03951e-55	1.01643	0.428	0.131	1.8418e-51	3.26717
Cyp39a1	1.69328e-37	0.63136	0.26	0.081	3.00015e-33	3.20987
Cit	1.10618e-113	1.44813	0.704	0.22	1.95993e-109	3.2
Racgap1	2.36074e-76	1.11718	0.537	0.168	4.18277e-72	3.19643
Fzr1	5.36162e-18	0.497085	0.203	0.065	9.49972e-14	3.12307
Cenpn	1.7036e-23	0.493228	0.192	0.062	3.01844e-19	3.09677
Rexo5	1.83273e-26	0.643035	0.266	0.087	3.24723e-22	3.05747
Cenpi	6.16098e-32	0.652012	0.293	0.096	1.0916e-27	3.05208
Melk	3.52095e-30	0.674248	0.291	0.096	6.23841e-26	3.03125
Gm13791	1.06045e-16	0.552716	0.203	0.067	1.87891e-12	3.02985
Gpsm2	8.88384e-24	0.593797	0.253	0.084	1.57404e-19	3.0119
Hmgb2	5.56089e-40	0.777725	0.362	0.122	9.85279e-36	2.96721
Uevld	1.12734e-16	0.381046	0.153	0.052	1.99743e-12	2.9423
Ddx11	1.78791e-28	0.641274	0.276	0.094	3.16782e-24	2.93617
Kif15	1.45979e-115	1.38703	0.764	0.261	2.58645e-111	2.9272
Crnde	1.00558e-14	0.409695	0.158	0.054	1.78169e-10	2.92592
Eri2	1.3537e-16	0.481282	0.198	0.068	2.39849e-12	2.91176
Pbk	2.14926e-13	0.416959	0.162	0.056	3.80806e-09	2.89285
Top2a	8.73677e-195	1.82603	0.92	0.319	1.54798e-190	2.88401
Stil	2.74766e-27	0.698887	0.322	0.114	4.8683e-23	2.82456
Kctd9	2.58409e-18	0.426765	0.175	0.062	4.57848e-14	2.82258
Fbxo5	6.27149e-14	0.432642	0.183	0.065	1.11118e-09	2.81538
Mns1	9.50121e-24	0.522136	0.233	0.083	1.68342e-19	2.80723
Rangap1	5.55395e-46	0.866756	0.439	0.157	9.84048e-42	2.79618
Ccdc77	3.30979e-19	0.444635	0.2	0.073	5.86429e-15	2.73972
Ncaph	2.84553e-22	0.629816	0.301	0.11	5.04172e-18	2.73636
Nemp1	6.417e-17	0.425648	0.175	0.064	1.13696e-12	2.73437
Bub3	8.92133e-22	0.560976	0.26	0.096	1.58068e-17	2.70833
Neil3	1.13895e-46	0.883371	0.475	0.177	2.01799e-42	2.68361
Pde1a	1.6544e-22	0.602256	0.229	0.086	2.93126e-18	2.66279
Wee1	2.1288e-31	0.580211	0.292	0.11	3.77182e-27	2.65454
Plk4	2.1556e-26	0.622504	0.31	0.117	3.8193e-22	2.64957
Terf1	3.27466e-34	0.858906	0.446	0.169	5.80204e-30	2.63905
Gm12610	2.88785e-08	0.357571	0.15	0.058	0.00051167	2.5862
Fut10	6.78009e-22	0.482409	0.214	0.083	1.2013e-17	2.57831
Esco2	2.06911e-19	0.559942	0.269	0.105	3.66604e-15	2.5619
E2f8	3.06425e-16	0.420068	0.192	0.075	5.42924e-12	2.56
G2e3	3.79738e-103	1.38569	0.739	0.289	6.7282e-99	2.55709
Ska2	6.46046e-38	0.701866	0.361	0.142	1.14466e-33	2.54225
Fancd2	1.31863e-25	0.509528	0.244	0.096	2.33635e-21	2.54166
Lrfn2	4.04339e-17	0.57392	0.245	0.097	7.16408e-13	2.52577
Ccdc61	6.34398e-15	0.369962	0.171	0.068	1.12403e-10	2.5147
Ube2s	4.16347e-11	0.389056	0.173	0.069	7.37684e-07	2.50724
Katnal2	3.89862e-12	0.441579	0.209	0.084	6.90757e-08	2.48809
Lmnb2	3.07747e-15	0.39105	0.181	0.073	5.45265e-11	2.47945
Ticrr	6.97517e-28	0.584276	0.285	0.115	1.23586e-23	2.47826
Cntrl	1.10731e-78	1.19858	0.644	0.262	1.96193e-74	2.45801
Mybl1	6.82282e-15	0.399492	0.193	0.079	1.20887e-10	2.44303
Mamdc2	7.35428e-36	0.812626	0.389	0.16	1.30303e-31	2.43125
Adam12	1.09769e-08	0.42085	0.183	0.076	0.000194489	2.40789
Diaph3	7.06945e-121	1.30494	0.855	0.356	1.25257e-116	2.40168
Ldlr	4.93451e-10	0.409399	0.188	0.079	8.74297e-06	2.37974
Ncapd2	1.06586e-70	1.03809	0.628	0.265	1.88848e-66	2.36981
Papd7	6.88947e-26	0.589835	0.326	0.138	1.22068e-21	2.36232
Syt13	8.25022e-26	0.668015	0.356	0.151	1.46177e-21	2.35761
Cenpp	1.12495e-68	1.09089	0.71	0.302	1.99318e-64	2.35099
Cep70	1.45555e-17	0.494511	0.249	0.106	2.57895e-13	2.34905
Smc4	4.25168e-130	1.39729	0.837	0.357	7.53312e-126	2.34454
Tbc1d31	3.92942e-26	0.544211	0.288	0.123	6.96215e-22	2.34146
Hist1h1b	1.00753e-22	0.529903	0.264	0.113	1.78514e-18	2.33628
Cntrob	8.02038e-14	0.367201	0.174	0.075	1.42105e-09	2.32
Zwilch	1.39255e-14	0.437824	0.22	0.095	2.46732e-10	2.31579
Polq	1.08021e-26	0.713	0.439	0.19	1.91392e-22	2.31053
Ttf2	4.18975e-10	0.385109	0.184	0.08	7.4234e-06	2.3
Kif24	2.06613e-20	0.619132	0.367	0.16	3.66077e-16	2.29375
Lama5	9.52911e-33	0.862294	0.437	0.192	1.68837e-28	2.27604
Jade1	2.2037e-12	0.30709	0.159	0.07	3.90451e-08	2.27143
Mettl15	1.13414e-31	0.724761	0.427	0.188	2.00947e-27	2.27128
Mki67	2.18412e-220	1.9579	0.98	0.435	3.86982e-216	2.25287
Ckap5	2.35434e-130	1.45198	0.845	0.376	4.17142e-126	2.24734
Ngfr	2.10024e-09	0.346505	0.189	0.085	3.72121e-05	2.22353
Cep85	1.1412e-20	0.419844	0.225	0.102	2.02197e-16	2.20588
Fat3	1.52935e-77	1.1449	0.756	0.345	2.70971e-73	2.1913
Rad21	4.04304e-70	1.06443	0.698	0.319	7.16346e-66	2.18809
Etv5	2.61881e-13	0.441338	0.181	0.083	4.64001e-09	2.18072
Cklf	7.22241e-19	0.551084	0.341	0.157	1.27967e-14	2.17197
Jag1	2.86586e-13	0.409193	0.23	0.106	5.07773e-09	2.16981
Ccng2	4.92318e-13	0.372856	0.2	0.093	8.72289e-09	2.15054
Cenpc1	2.09911e-42	0.906528	0.578	0.269	3.7192e-38	2.1487
Sorcs2	1.69586e-41	0.910997	0.55	0.257	3.00473e-37	2.14008
Uaca	7.97149e-10	0.30856	0.19	0.089	1.41239e-05	2.13483
Fanci	5.4751e-07	0.330668	0.175	0.082	0.00970079	2.13414
Odf2	8.8749e-36	0.735647	0.475	0.223	1.57245e-31	2.13004
Ift80	1.80117e-31	0.650896	0.422	0.199	3.19131e-27	2.1206
Stk17b	1.304e-12	0.330285	0.197	0.093	2.31042e-08	2.11828
Ccdc34	4.71865e-21	0.589311	0.378	0.179	8.3605e-17	2.11173
Klf6	1.83297e-13	0.278628	0.171	0.081	3.24765e-09	2.11111
Sun2	7.00919e-16	0.378886	0.219	0.104	1.24189e-11	2.10577
Smc2	2.19155e-87	1.1504	0.815	0.388	3.88299e-83	2.10051
Hist1h1e	1.4808e-19	0.532921	0.266	0.127	2.62368e-15	2.09449
Notch2	2.48269e-15	0.576514	0.379	0.181	4.39884e-11	2.09392
Alg8	3.67035e-09	0.279239	0.154	0.074	6.50313e-05	2.08108
Polh	3.55155e-12	0.350033	0.185	0.089	6.29264e-08	2.07865
Wdr62	1.91247e-08	0.297875	0.16	0.077	0.000338852	2.07792
Mdc1	6.07032e-19	0.526259	0.34	0.165	1.07554e-14	2.0606
E2f5	3.98377e-16	0.348549	0.208	0.101	7.05844e-12	2.0594
Hmgn2	2.74066e-06	0.317728	0.189	0.092	0.0485591	2.05435
Pdgfa	6.13808e-07	0.284063	0.153	0.075	0.0108754	2.04
Rad54b	5.81842e-16	0.45546	0.299	0.147	1.03091e-11	2.03401
Pou6f2	1.66655e-12	0.400001	0.191	0.094	2.9528e-08	2.03191
Atl2	1.38477e-23	0.50356	0.333	0.164	2.45354e-19	2.03049
Lmnb1	1.13335e-68	0.915408	0.676	0.335	2.00807e-64	2.01791
Ndc1	4.67879e-16	0.401977	0.256	0.127	8.28988e-12	2.01575
Arhgap33	1.85861e-18	0.507966	0.32	0.16	3.29309e-14	2
Hirip3	3.66832e-10	0.365013	0.233	0.117	6.49952e-06	1.99145
Cenpk	2.18255e-11	0.343255	0.218	0.11	3.86704e-07	1.98182
Cep128	5.55623e-49	0.821622	0.661	0.334	9.84453e-45	1.97904
Rgma	6.94333e-22	0.614116	0.429	0.217	1.23022e-17	1.97696
Cep192	4.05184e-34	0.716084	0.531	0.269	7.17906e-30	1.97398
Anp32e	7.4966e-23	0.578243	0.414	0.21	1.32825e-18	1.97143
Cep57l1	1.17514e-16	0.401847	0.24	0.122	2.08211e-12	1.96721
Pkp4	2.23515e-75	1.02073	0.78	0.397	3.96023e-71	1.96474
Hhip	4.34885e-30	0.802408	0.497	0.253	7.70529e-26	1.96443
Lin9	2.21563e-16	0.388868	0.275	0.141	3.92566e-12	1.95035
Rbm15	5.22315e-12	0.343444	0.224	0.115	9.25439e-08	1.94782
Tmpo	4.72343e-56	0.898107	0.728	0.374	8.36897e-52	1.94652
Hpca	2.84018e-21	0.563982	0.369	0.19	5.03223e-17	1.9421
Ncaph2	1.89342e-14	0.380013	0.26	0.134	3.35476e-10	1.9403
Cep112	3.77004e-28	0.606185	0.421	0.217	6.67976e-24	1.94009
Mdm1	1.2609e-11	0.343393	0.223	0.115	2.23407e-07	1.93913
Prkcq	6.17792e-12	0.349559	0.248	0.128	1.0946e-07	1.9375
Cenpj	1.4389e-08	0.450138	0.317	0.164	0.000254944	1.93293
Nucks1	3.16365e-42	0.834846	0.62	0.321	5.60535e-38	1.93146
Adamts12	1.79707e-16	0.433642	0.276	0.143	3.18405e-12	1.93007
Pdzrn4	4.02523e-37	0.737239	0.641	0.334	7.1319e-33	1.91916
Hdgf	1.78051e-13	0.408704	0.301	0.157	3.15471e-09	1.9172
H2afv	2.50469e-15	0.419114	0.295	0.154	4.43781e-11	1.91558
Rad51ap1	1.18353e-08	0.3146	0.199	0.104	0.000209698	1.91346
Jpt1	1.12466e-14	0.412958	0.298	0.156	1.99267e-10	1.91026
Brd8	4.29085e-51	0.915742	0.709	0.372	7.60253e-47	1.90591
Creb5	1.35746e-08	0.588132	0.276	0.145	0.000240514	1.90345
Tdp1	1.58129e-19	0.462063	0.325	0.171	2.80173e-15	1.90058
Rbl1	3.21731e-11	0.409504	0.313	0.165	5.70043e-07	1.89697
Bmpr1b	1.42983e-09	0.404324	0.254	0.134	2.53338e-05	1.89552
Poc5	1.9103e-05	0.255898	0.157	0.083	0.338466	1.89156
E2f7	5.40632e-19	0.44575	0.325	0.172	9.57891e-15	1.88953
Plch1	1.26028e-12	0.41677	0.304	0.161	2.23296e-08	1.8882
Efs	3.39809e-13	0.269427	0.183	0.097	6.02074e-09	1.8866
Alg13	1.23616e-14	0.374285	0.273	0.145	2.19023e-10	1.88276
Hjurp	2.09172e-84	1.1409	0.837	0.446	3.70611e-80	1.87668
Cep135	3.7893e-17	0.466307	0.362	0.193	6.71389e-13	1.87565
Calcrl	4.98968e-11	0.330372	0.215	0.115	8.84072e-07	1.86956
Asxl1	1.93255e-59	0.901523	0.693	0.373	3.42409e-55	1.85791
Gm5577	2.74986e-12	0.297392	0.206	0.111	4.8722e-08	1.85585
Kntc1	8.01572e-15	0.39403	0.333	0.18	1.42022e-10	1.85
Mtmr12	1.61036e-17	0.360488	0.26	0.141	2.85324e-13	1.84397
Cep295	1.16857e-30	0.644736	0.534	0.29	2.07047e-26	1.84138
Sephs1	4.52569e-15	0.364921	0.276	0.15	8.01862e-11	1.84
Adcy2	3.4477e-12	0.552014	0.296	0.161	6.10864e-08	1.83851
Lbr	3.38198e-23	0.495475	0.398	0.217	5.99219e-19	1.8341
Cdh13	4.76391e-38	0.929566	0.649	0.354	8.44069e-34	1.83333
Itga9	9.94974e-09	0.464463	0.253	0.138	0.00017629	1.83333
Mtmr14	1.82812e-09	0.254491	0.179	0.098	3.23906e-05	1.82653
Usp1	6.9358e-13	0.319713	0.237	0.13	1.22889e-08	1.82308
Lmo4	6.52916e-09	0.269908	0.184	0.101	0.000115684	1.82178
Adamts14	1.23206e-22	0.514963	0.434	0.239	2.18296e-18	1.8159
Gm48530	1.9611e-11	0.345006	0.248	0.137	3.47468e-07	1.81022
Gpr153	3.37966e-12	0.444723	0.407	0.225	5.98809e-08	1.80889
Zc3h7a	2.17457e-24	0.674609	0.548	0.303	3.85291e-20	1.80858
Pqlc1	1.05466e-15	0.485175	0.391	0.217	1.86865e-11	1.80184
Fgfr1op	1.55989e-08	0.259999	0.197	0.111	0.000276381	1.77477
Bard1	5.62815e-10	0.29661	0.241	0.136	9.97196e-06	1.77206
Smco4	1.17158e-12	0.323776	0.269	0.152	2.0758e-08	1.76974
Wdpcp	1.93539e-29	0.59952	0.524	0.297	3.42912e-25	1.76431
Nedd1	3.887e-05	0.30539	0.234	0.133	0.688699	1.7594
Cdk5rap2	8.81638e-69	0.904245	0.781	0.444	1.56209e-64	1.75901
Ncapg2	4.83982e-18	0.369652	0.341	0.194	8.57519e-14	1.75773
Pdlim3	1.44685e-27	0.585516	0.579	0.33	2.56352e-23	1.75454
Gm11541	1.1917e-07	0.274675	0.247	0.141	0.00211146	1.75177
Fstl1	5.15366e-08	0.291944	0.261	0.149	0.000913126	1.75168
Pclaf	1.67614e-09	0.27726	0.238	0.136	2.96978e-05	1.75
Psat1	2.66427e-08	0.293086	0.217	0.124	0.000472056	1.75
Lin54	5.03927e-08	0.291769	0.22	0.126	0.000892858	1.74603
Cdc7	1.9593e-05	0.266644	0.197	0.113	0.347148	1.74336
Pxdn	2.19092e-12	0.296883	0.233	0.134	3.88186e-08	1.7388
Kmt5a	1.13099e-06	0.28894	0.229	0.132	0.0200388	1.73485
Smad3	3.18818e-13	0.458028	0.405	0.234	5.64882e-09	1.73077
Akirin2	8.84334e-12	0.258589	0.218	0.126	1.56686e-07	1.73016
Cep152	1.32661e-12	0.363338	0.33	0.191	2.35048e-08	1.72775
Dusp10	5.6303e-06	0.301903	0.226	0.131	0.0997577	1.72519
Cars	1.6349e-11	0.289404	0.181	0.105	2.89672e-07	1.72381
Cep57	1.23261e-10	0.309808	0.256	0.149	2.18394e-06	1.71812
Stxbp6	1.14726e-30	0.562035	0.598	0.349	2.03271e-26	1.71347
Hk2	1.56461e-10	0.302324	0.281	0.164	2.77218e-06	1.71341
Igf2bp3	2.18154e-08	0.330022	0.258	0.151	0.000386525	1.70861
Ddr2	3.54236e-10	0.473235	0.476	0.279	6.27636e-06	1.70609
Vps36	0.0121306	0.261278	0.199	0.117	1	1.70085
Cdc27	7.35145e-26	0.513642	0.506	0.298	1.30253e-21	1.69799
Gli1	1.35826e-12	0.408413	0.411	0.243	2.40656e-08	1.69136
Mcph1	1.68021e-24	0.577758	0.608	0.36	2.97699e-20	1.68889
Mad1l1	4.30048e-12	0.492666	0.477	0.283	7.61959e-08	1.68551
Thsd4	3.13391e-09	0.563127	0.372	0.221	5.55267e-05	1.68326
Sae1	5.75131e-14	0.417814	0.427	0.254	1.01902e-09	1.6811
Traf3	4.7776e-11	0.378746	0.361	0.215	8.46496e-07	1.67907
Serinc5	1.84548e-17	0.478961	0.487	0.291	3.26982e-13	1.67354
Sugp2	6.576e-07	0.28535	0.256	0.153	0.0116514	1.6732
Rad18	3.23081e-13	0.337628	0.336	0.201	5.72435e-09	1.67164
Csgalnact1	8.1506e-11	0.285083	0.224	0.134	1.44412e-06	1.67164
B3glct	3.49753e-09	0.279722	0.249	0.149	6.19693e-05	1.67114
Blm	1.45819e-12	0.369369	0.384	0.23	2.58362e-08	1.66956
Airn	5.3314e-27	0.566044	0.542	0.325	9.44617e-23	1.66769
Cplx2	1.14449e-20	0.500767	0.455	0.273	2.02781e-16	1.66667
Zdbf2	1.1189e-12	0.381982	0.374	0.225	1.98247e-08	1.66222
Clstn2	0.000852427	0.284942	0.196	0.118	1	1.66102
Gstcd	3.91483e-09	0.348729	0.34	0.205	6.93629e-05	1.65854
Adamts1	3.80009e-12	0.271365	0.252	0.152	6.73299e-08	1.65789
Hsp90b1	6.0643e-15	0.537608	0.549	0.332	1.07447e-10	1.65361
Bcl2	6.33805e-12	0.321183	0.311	0.189	1.12298e-07	1.6455
Pcnt	1.29917e-15	0.462273	0.506	0.309	2.30187e-11	1.63754
Srbd1	9.91259e-17	0.438724	0.46	0.281	1.75631e-12	1.63701
Odf2l	2.08481e-06	0.269509	0.259	0.159	0.0369387	1.62893
Igsf3	1.32953e-06	0.261569	0.257	0.158	0.0235565	1.62658
Cse1l	1.01671e-06	0.30984	0.3	0.185	0.0180141	1.62162
Lnpk	1.78037e-10	0.37662	0.415	0.256	3.15447e-06	1.62109
Tnpo2	4.57484e-07	0.269789	0.256	0.158	0.00810571	1.62025
Vrk1	2.66836e-05	0.262087	0.267	0.165	0.47278	1.61818
Ccnd1	6.56825e-21	0.464688	0.552	0.342	1.16376e-16	1.61403
Grb10	2.02152e-10	0.388755	0.316	0.196	3.58172e-06	1.61224
Adamts6	5.81585e-44	0.718726	0.746	0.463	1.03045e-39	1.61123
Palld	3.07973e-07	0.25445	0.222	0.138	0.00545667	1.60869
Epb41l2	2.68948e-14	0.273954	0.505	0.314	4.76523e-10	1.60828
Hunk	1.51129e-07	0.314187	0.312	0.194	0.0026777	1.60825
Chsy1	8.78745e-15	0.348377	0.373	0.232	1.55696e-10	1.60776
Tspan18	3.33434e-11	0.28322	0.316	0.197	5.90779e-07	1.60406
Brip1	0.000940404	0.254898	0.253	0.158	1	1.60126
Elmsan1	8.24768e-13	0.342151	0.381	0.238	1.46132e-08	1.60084
Rad51b	8.55544e-22	0.344663	0.568	0.355	1.51585e-17	1.6
Adamts20	9.34129e-14	0.323872	0.368	0.23	1.65509e-09	1.6
Brca1	4.16632e-11	0.250913	0.304	0.19	7.38189e-07	1.6
Nin	7.80316e-21	0.547449	0.635	0.397	1.38256e-16	1.5995
Pcf11	4.86299e-22	0.401325	0.439	0.275	8.61624e-18	1.59636
Katnbl1	5.91214e-07	0.264942	0.281	0.177	0.0104751	1.58757
Rttn	5.23873e-09	0.323762	0.381	0.24	9.28198e-05	1.5875
Sgcd	3.10633e-21	0.686596	0.625	0.394	5.50379e-17	1.58629
Cerk	2.8395e-08	0.31585	0.368	0.232	0.000503102	1.58621
Dpysl4	6.37062e-09	0.339826	0.385	0.243	0.000112875	1.58436
Ulk4	1.02463e-06	0.381411	0.326	0.206	0.0181545	1.58252
Ptpa	4.93366e-08	0.269653	0.286	0.181	0.000874145	1.58011
Anp32b	5.01199e-13	0.290089	0.338	0.214	8.88024e-09	1.57944
Bcar3	4.39484e-06	0.276306	0.259	0.164	0.0778678	1.57927
H1f0	9.3469e-16	0.28558	0.295	0.187	1.65608e-11	1.57754
Nhs	1.00955e-17	0.453761	0.535	0.34	1.78871e-13	1.57353
Tpk1	9.06263e-10	0.287505	0.292	0.186	1.60572e-05	1.56989
Homer2	1.3503e-09	0.290594	0.373	0.238	2.39246e-05	1.56723
Hmgb1	3.03065e-10	0.33879	0.42	0.268	5.3697e-06	1.56716
Tmtc1	9.78887e-10	0.337524	0.448	0.286	1.73439e-05	1.56643
Cep83	3.10592e-16	0.43614	0.54	0.345	5.50307e-12	1.56522
Ncapd3	3.69023e-15	0.420172	0.488	0.312	6.53835e-11	1.5641
Uhrf2	2.35725e-31	0.634578	0.717	0.459	4.17657e-27	1.56209
Rftn2	6.14991e-14	0.381272	0.417	0.267	1.08964e-09	1.5618
Nup205	7.83858e-09	0.314891	0.388	0.249	0.000138884	1.55823
Lrig3	2.76165e-32	0.573881	0.715	0.459	4.8931e-28	1.55773
Mphosph9	2.86152e-26	0.546674	0.654	0.42	5.07004e-22	1.55714
Ebf2	1.01486e-11	0.451201	0.499	0.321	1.79813e-07	1.55452
Zcchc8	3.02212e-08	0.270872	0.346	0.223	0.000535458	1.55157
Il1rapl1	3.12742e-20	0.495148	0.677	0.437	5.54116e-16	1.5492
Ubash3b	3.95622e-10	0.45887	0.463	0.299	7.00963e-06	1.54849
Ahctf1	5.9345e-15	0.369101	0.478	0.309	1.05148e-10	1.54693
Sh3bgrl	2.64002e-11	0.310238	0.355	0.231	4.67758e-07	1.5368
Ctcf	6.83396e-14	0.361117	0.488	0.318	1.21084e-09	1.53459
Calm2	3.21711e-17	0.45717	0.561	0.366	5.70007e-13	1.53279
Ralgps2	3.30401e-27	0.648195	0.719	0.47	5.85404e-23	1.52979
Hp1bp3	3.83775e-11	0.397954	0.517	0.339	6.79972e-07	1.52507
Ilf3	1.276e-17	0.4026	0.549	0.36	2.26082e-13	1.525
Tbata	4.52187e-07	0.275869	0.279	0.183	0.00801185	1.52459
Suz12	2.4005e-12	0.337864	0.469	0.308	4.25321e-08	1.52273
Eif4e	2.43179e-05	0.251433	0.303	0.199	0.430864	1.52261
Lpin2	9.53399e-14	0.330953	0.515	0.34	1.68923e-09	1.51471
Zc3h12c	1.73169e-10	0.350882	0.465	0.307	3.06821e-06	1.51466
Tpcn1	2.1307e-16	0.423799	0.577	0.381	3.77517e-12	1.51444
Cntln	3.4695e-16	0.396081	0.51	0.337	6.14726e-12	1.51335
Ttll4	1.26061e-09	0.305046	0.408	0.27	2.23355e-05	1.51111
Rai14	4.67963e-12	0.336953	0.471	0.312	8.29136e-08	1.50961
Gpc6	1.30527e-28	0.460786	0.826	0.549	2.31268e-24	1.50455
Sesn1	6.78525e-08	0.262037	0.318	0.212	0.00120221	1.5
Samd4	0.000132283	0.256393	0.276	0.184	1	1.5
Ncald	2.42178e-29	0.65586	0.726	0.485	4.29091e-25	1.49691
C2cd5	9.344e-15	0.403161	0.555	0.371	1.65557e-10	1.49596
Znrf2	1.14614e-09	0.251703	0.323	0.216	2.03073e-05	1.49537
Gli2	1.95063e-30	0.483804	0.838	0.561	3.45613e-26	1.49376
Dleu2	4.49465e-22	0.440566	0.663	0.444	7.96362e-18	1.49324
Rbms3	4.30895e-12	0.277483	0.536	0.359	7.6346e-08	1.49304
Fancc	1.1601e-13	0.311196	0.475	0.319	2.05547e-09	1.48903
Thada	3.94575e-11	0.377489	0.552	0.371	6.99108e-07	1.48787
Ipo11	9.2377e-15	0.345078	0.501	0.337	1.63673e-10	1.48665
Ctnnb1	1.8219e-08	0.275881	0.389	0.262	0.000322804	1.48473
Cdh4	1.21218e-28	0.499378	0.771	0.52	2.14775e-24	1.48269
Rbmx	4.77586e-12	0.323653	0.467	0.315	8.46186e-08	1.48254
Qser1	4.97184e-16	0.371779	0.522	0.353	8.80911e-12	1.47875
Numa1	4.17622e-24	0.426386	0.592	0.401	7.39942e-20	1.47631
Nup98	1.87015e-14	0.342552	0.5	0.339	3.31354e-10	1.47493
Prkd3	1.55363e-06	0.277547	0.443	0.301	0.0275271	1.47176
Antxr2	1.49373e-12	0.314156	0.481	0.327	2.64658e-08	1.47095
Dusp16	9.80939e-11	0.261437	0.313	0.213	1.73803e-06	1.46948
Cmtm4	6.91766e-08	0.264319	0.408	0.278	0.00122567	1.46763
Xpo1	9.3431e-25	0.473437	0.693	0.473	1.65541e-20	1.46512
Ezh2	3.15489e-21	0.490679	0.742	0.507	5.58984e-17	1.46351
Cdk17	7.71988e-09	0.327726	0.471	0.322	0.000136781	1.46273
Dek	5.98075e-11	0.286791	0.485	0.332	1.05967e-06	1.46084
Acer3	0.00873262	0.257111	0.241	0.165	1	1.46061
Ppp2r5c	2.01478e-09	0.352108	0.536	0.367	3.56979e-05	1.46049
Nup210	2.85046e-06	0.28096	0.385	0.264	0.0505045	1.45833
Kcnh5	1.7841e-07	0.274182	0.401	0.275	0.00316108	1.45818
Ptch2	3.06759e-15	0.41265	0.63	0.433	5.43515e-11	1.45497
Lcorl	2.94642e-17	0.439091	0.663	0.456	5.22046e-13	1.45395
Cbfb	9.01412e-09	0.275799	0.433	0.298	0.000159712	1.45302
Irs1	9.75472e-16	0.444168	0.704	0.485	1.72834e-11	1.45155
Nasp	1.15419e-12	0.340165	0.644	0.444	2.04499e-08	1.45045
N4bp2	1.10728e-09	0.254263	0.438	0.302	1.96187e-05	1.45033
Ttll5	1.73638e-09	0.361442	0.554	0.382	3.07652e-05	1.45026
Igdcc4	3.07529e-11	0.254876	0.551	0.381	5.4488e-07	1.44619
Hnrnpul1	1.31631e-13	0.346565	0.539	0.373	2.33223e-09	1.44504
Nrf1	2.08002e-11	0.32784	0.564	0.391	3.68538e-07	1.44245
Stt3b	3.3425e-09	0.261466	0.47	0.326	5.92223e-05	1.44172
Cdk19	2.29059e-14	0.444012	0.66	0.458	4.05848e-10	1.44105
Smc1a	5.31367e-14	0.312309	0.545	0.38	9.41477e-10	1.43421
Cbx1	4.09036e-08	0.252458	0.44	0.308	0.00072473	1.42857
Ppm1b	9.50749e-08	0.269607	0.42	0.294	0.00168454	1.42857
Hcfc1	1.04444e-07	0.292166	0.494	0.346	0.00185054	1.42775
Mpdz	3.68928e-09	0.280841	0.516	0.362	6.53666e-05	1.42541
Wapl	1.06721e-06	0.300194	0.471	0.331	0.0189087	1.42296
Kansl1l	5.14185e-11	0.280176	0.485	0.341	9.11032e-07	1.42229
Cdyl	2.34633e-12	0.266058	0.436	0.307	4.15722e-08	1.42019
Spop	0.000150172	0.256999	0.37	0.261	1	1.41762
Zfp91	5.69956e-13	0.312007	0.553	0.392	1.00985e-08	1.41071
Mdm4	1.63398e-09	0.314641	0.531	0.377	2.89508e-05	1.40849
Myef2	2.68079e-18	0.42551	0.666	0.473	4.74983e-14	1.40803
Asap1	2.60024e-27	0.511981	0.801	0.569	4.60711e-23	1.40773
Prkce	1.82181e-15	0.271852	0.622	0.442	3.22788e-11	1.40724
Bahcc1	3.85877e-15	0.425789	0.679	0.483	6.83696e-11	1.4058
Fam19a5	2.15612e-12	0.267861	0.485	0.345	3.82021e-08	1.4058
Sdk1	1.48931e-53	0.736857	0.902	0.643	2.63877e-49	1.4028
Plxnc1	7.5929e-10	0.273533	0.519	0.37	1.34531e-05	1.4027
Tubb5	1.7733e-10	0.261158	0.472	0.337	3.14193e-06	1.40059
Dyrk1a	9.97071e-19	0.49681	0.75	0.536	1.76661e-14	1.39925
Btaf1	1.26616e-09	0.275037	0.461	0.33	2.24338e-05	1.39697
Rassf3	3.45393e-18	0.375736	0.735	0.527	6.11967e-14	1.39469
Magi3	1.64331e-12	0.304121	0.626	0.45	2.91161e-08	1.39111
Pspc1	1.13385e-13	0.252752	0.493	0.356	2.00896e-09	1.38483
Trerf1	4.56606e-11	0.259662	0.51	0.371	8.09014e-07	1.37466
Prrc2a	1.39248e-12	0.363969	0.643	0.468	2.4672e-08	1.37393
Cspp1	3.85664e-09	0.308168	0.649	0.473	6.8332e-05	1.37209
Fgd6	2.31766e-06	0.257618	0.513	0.374	0.0410643	1.37166
Gtf3c1	1.75092e-07	0.268754	0.557	0.407	0.00310227	1.36855
Pde4b	6.69077e-14	0.34779	0.687	0.502	1.18547e-09	1.36853
Draxin	1.36804e-14	0.307716	0.784	0.573	2.42389e-10	1.36824
Boc	4.44213e-16	0.396268	0.85	0.622	7.87056e-12	1.36656
Srrt	1.98476e-06	0.264035	0.506	0.371	0.0351659	1.36388
Gsg1l	4.07425e-40	0.590127	0.931	0.683	7.21875e-36	1.3631
Cbx5	6.43829e-08	0.287003	0.711	0.522	0.00114074	1.36207
Tmem131l	1.80653e-09	0.276871	0.604	0.444	3.2008e-05	1.36036
Zfp704	5.93566e-54	0.74054	0.903	0.664	1.05168e-49	1.35994
Tcerg1	1.05571e-06	0.306215	0.65	0.48	0.018705	1.35417
Wnk1	6.37945e-18	0.449087	0.765	0.565	1.13031e-13	1.35398
Osbp2	8.10055e-07	0.275051	0.536	0.396	0.0143526	1.35354
Frmd4b	6.60998e-72	0.910668	0.952	0.704	1.17116e-67	1.35227
Pou2f1	1.27604e-09	0.317885	0.669	0.496	2.26089e-05	1.34879
Dclk1	2.95057e-16	0.440729	0.786	0.585	5.22781e-12	1.34359
Nell2	5.49154e-12	0.278342	0.696	0.52	9.72991e-08	1.33846
Pds5b	7.89968e-09	0.353099	0.775	0.585	0.000139967	1.32479
Syncrip	2.37159e-12	0.26096	0.677	0.512	4.20199e-08	1.32227
Exoc2	1.63163e-12	0.302674	0.611	0.466	2.89093e-08	1.31116
Atf7ip	7.26198e-05	0.253693	0.6	0.459	1	1.30719
Nsd2	1.15823e-14	0.338489	0.801	0.613	2.05214e-10	1.30669
Zfhx3	2.89716e-15	0.358474	0.786	0.602	5.13318e-11	1.30565
Cntnap2	3.15979e-22	0.547592	0.749	0.574	5.59852e-18	1.30488
Ppp6r3	1.78189e-13	0.314221	0.716	0.551	3.15715e-09	1.29946
Zfp608	3.37104e-13	0.322252	0.774	0.596	5.9728e-09	1.29866
Tox3	7.46832e-27	0.360025	0.835	0.643	1.32324e-22	1.2986
Tead1	3.39493e-25	0.43423	0.871	0.671	6.01513e-21	1.29806
Cnot1	3.63174e-08	0.261363	0.702	0.542	0.000643472	1.2952
Pak3	5.3936e-09	0.307285	0.758	0.588	9.55637e-05	1.28912
Pard3	5.91609e-23	0.385987	0.847	0.661	1.04821e-18	1.28139
Chd2	4.65768e-09	0.250053	0.717	0.56	8.25248e-05	1.28036
Trpm3	0.0332402	-0.460571	0.27	0.211	1	1.27962
Neo1	4.53247e-13	0.33239	0.788	0.619	8.03062e-09	1.27302
Syne2	1.54733e-14	0.279618	0.841	0.667	2.74156e-10	1.26087
Cdc42bpa	1.11017e-11	0.28446	0.757	0.601	1.967e-07	1.25957
Zfp536	2.03856e-12	0.344105	0.853	0.683	3.61192e-08	1.2489
Magi1	4.45872e-13	0.30678	0.817	0.656	7.89996e-09	1.24543
Hnrnpa2b1	2.85864e-32	0.429861	0.882	0.709	5.06494e-28	1.24401
Kcnq5	0.0240536	-0.329833	0.625	0.503	1	1.24254
Pcdh9	0.182838	-0.506802	0.581	0.469	1	1.23881
Tshz2	1.87951e-18	0.40023	0.914	0.743	3.33011e-14	1.23015
Cdk6	1.72865e-28	0.382174	0.941	0.768	3.06281e-24	1.22526
Stag1	5.52396e-14	0.358504	0.904	0.749	9.78736e-10	1.20694
Chd6	6.63335e-07	0.252271	0.824	0.683	0.011753	1.20644
Ptch1	7.22669e-29	0.565381	0.948	0.786	1.28043e-24	1.20611
Cadm1	9.56137e-30	0.462712	0.968	0.805	1.69408e-25	1.20248
Phip	3.50545e-15	0.313586	0.898	0.748	6.21095e-11	1.20053
Ncor2	2.38952e-21	0.376859	0.936	0.783	4.23375e-17	1.1954
Gm26917	0.000579178	0.301879	0.752	0.637	1	1.18053
Foxp2	3.16349e-27	0.323535	0.941	0.799	5.60508e-23	1.17772
Sfpq	5.64635e-08	0.258955	0.878	0.752	0.00100042	1.16755
Nedd4l	1.42094e-11	0.266212	0.91	0.78	2.51763e-07	1.16667
Lrrc7	9.64499e-43	0.527547	0.974	0.845	1.7089e-38	1.15266
Pbx3	5.70005e-13	0.345085	0.95	0.826	1.00993e-08	1.15012
Myo16	1.1037e-12	0.288017	0.924	0.808	1.95553e-08	1.14356
Cdh20	3.87766e-28	0.423812	0.993	0.873	6.87044e-24	1.13746
Msra	0.591337	-0.258983	0.524	0.467	1	1.12206
Map4k4	1.0188e-21	0.310171	0.947	0.851	1.80511e-17	1.11281
Ntm	0.76054	-0.321287	0.721	0.65	1	1.10923
Mir99ahg	1.56922e-13	0.291155	0.963	0.87	2.78034e-09	1.1069
Fam155a	3.74814e-27	0.490319	0.972	0.879	6.64095e-23	1.1058
Ptprm	0.00743967	-0.498101	0.253	0.229	1	1.1048
Ptprg	0.638697	-0.343302	0.905	0.825	1	1.09697
Zfp385b	0.939898	-0.308764	0.549	0.502	1	1.09363
Rbfox1	0.000651254	-0.368518	0.885	0.823	1	1.07533
Fgf13	0.0186867	-0.338962	0.62	0.578	1	1.07266
Enox1	0.0490343	-0.257198	0.785	0.735	1	1.06803
March1	0.0339741	-0.288703	0.607	0.569	1	1.06678
Hs6st3	0.739786	-0.432651	0.495	0.466	1	1.06223
Ptprk	0.0466176	-0.285277	0.575	0.544	1	1.05699
Map2	1.0311e-08	-0.26416	0.882	0.835	0.00018269	1.05629
Ccser1	0.00703964	-0.266366	0.92	0.872	1	1.05505
Klhl29	3.95528e-05	-0.5326	0.639	0.609	0.700796	1.04926
Sobp	0.0227791	-0.292984	0.757	0.724	1	1.04558
Kcnj3	0.446346	-0.328827	0.553	0.529	1	1.04537
Psd3	0.0594175	-0.266792	0.656	0.628	1	1.04459
Maml3	1.47352e-07	-0.264847	0.918	0.879	0.00261079	1.04437
Ank2	3.47195e-07	-0.375554	0.931	0.893	0.0061516	1.04255
Cmss1	7.99985e-06	0.25843	0.986	0.948	0.141741	1.04008
Snap25	0.00387564	-0.29195	0.59	0.568	1	1.03873
Astn2	7.60884e-11	-0.433664	0.912	0.878	1.34813e-06	1.03872
Nav3	6.32007e-13	-0.433868	0.783	0.754	1.11979e-08	1.03846
Ank3	9.99435e-08	-0.280117	0.959	0.924	0.0017708	1.03788
B3galt1	1.18405e-12	-0.322167	0.832	0.802	2.0979e-08	1.03741
Sgms1	0.449959	-0.301961	0.264	0.255	1	1.03529
Celf2	3.17649e-06	-0.262766	0.99	0.957	0.0562811	1.03448
Clmp	0.232274	-0.308961	0.482	0.466	1	1.03433
Ctnnd2	1.21909e-09	-0.274078	0.935	0.904	2.15999e-05	1.03429
Ppp3ca	7.24343e-07	-0.282659	0.817	0.79	0.0128339	1.03418
Lsamp	3.78667e-12	-0.583402	0.954	0.923	6.70921e-08	1.03359
Xist	0.137782	0.265838	0.44	0.426	1	1.03286
Col11a1	0.000118685	-0.260722	0.505	0.489	1	1.03272
Miat	0.000389692	-0.295961	0.743	0.72	1	1.03194
Cadm2	0.00011953	-1.02038	0.556	0.539	1	1.03154
Ppp2r2c	0.00200312	-0.263232	0.658	0.638	1	1.03135
Fmnl2	5.86707e-08	-0.347196	0.757	0.734	0.00103953	1.03134
Plekha6	0.0534241	-0.253532	0.577	0.56	1	1.03036
Cacna2d1	1.20537e-10	-0.289457	0.994	0.965	2.13568e-06	1.03005
Erbb4	4.7582e-28	-0.776977	0.935	0.91	8.43057e-24	1.02747
Zfp521	0.000112229	-0.526183	0.698	0.68	1	1.02647
Ldlrad4	0.744011	-0.289137	0.462	0.451	1	1.02439
Sptbn1	0.204056	-0.477813	0.551	0.538	1	1.02416
Nrxn1	1.8411e-12	-0.442328	0.935	0.914	3.26207e-08	1.02298
Grik2	4.37818e-20	-0.508621	0.962	0.941	7.75727e-16	1.02232
Kcnb2	3.31297e-08	-0.532147	0.8	0.783	0.000586993	1.02171
Dcc	9.6621e-08	-0.254844	0.999	0.981	0.00171193	1.01835
Eln	0.198777	-0.281762	0.224	0.22	1	1.01818
Lrrtm3	0.106388	-0.334323	0.168	0.165	1	1.01818
Klf12	1.95919e-09	-0.346272	0.844	0.83	3.47129e-05	1.01687
Celf4	9.04958e-06	-0.651874	0.611	0.601	0.160341	1.01664
Sox5	1.77966e-07	-0.395569	0.712	0.701	0.0031532	1.01569
Cadps	6.76841e-17	-0.378565	0.819	0.807	1.19923e-12	1.01487
Macf1	5.4472e-11	-0.399442	0.761	0.75	9.65134e-07	1.01467
Pde4d	5.13777e-12	-0.664732	0.904	0.891	9.1031e-08	1.01459
Prkcb	5.16322e-08	-0.372692	0.844	0.833	0.000914819	1.01321
Dlg2	0.4992	-0.464836	0.334	0.33	1	1.01212
Phf20l1	0.00313138	-0.302001	0.574	0.568	1	1.01056
Gm4258	0.0156511	-0.359704	0.596	0.59	1	1.01017
Rbfox3	1.49354e-26	-0.713925	0.886	0.878	2.64625e-22	1.00911
Nlgn1	0.000107686	-0.396714	0.851	0.845	1	1.0071
Exoc6b	8.8063e-05	-0.307777	0.594	0.59	1	1.00678
Xkr4	5.94423e-06	-0.401383	0.673	0.669	0.10532	1.00598
Cask	3.16132e-05	-0.370064	0.634	0.631	0.560123	1.00475
Csmd2	0.434073	-0.340825	0.236	0.235	1	1.00425
Fbxl17	0.00076255	-0.294319	0.638	0.636	1	1.00314
Gria2	3.20181e-12	-0.414711	0.742	0.743	5.67297e-08	0.998654
Lpp	0.435197	-0.282837	0.47	0.471	1	0.997877
Gramd1b	6.59923e-15	-0.542995	0.757	0.759	1.16925e-10	0.997365
Utrn	0.0495514	-0.410715	0.343	0.345	1	0.994203
Ptprs	1.0282e-18	-0.538939	0.78	0.786	1.82177e-14	0.992366
Kif1b	2.55096e-15	-0.417213	0.765	0.771	4.51978e-11	0.992218
Syn2	0.0817796	-0.296877	0.375	0.378	1	0.992063
Zswim6	3.08309e-05	-0.301771	0.466	0.47	0.546262	0.991489
Apc	3.75968e-13	-0.489423	0.774	0.781	6.66141e-09	0.991037
Pik3r3	0.00061242	-0.326993	0.434	0.438	1	0.990867
Hectd4	0.0725141	-0.293742	0.506	0.511	1	0.990215
Insr	0.0334804	-0.288	0.441	0.446	1	0.988789
Gria4	3.46772e-23	-0.741839	0.837	0.85	6.1441e-19	0.984706
Anks1b	3.05238e-13	-0.697718	0.72	0.733	5.4082e-09	0.982265
Pde10a	0.321381	-0.277217	0.306	0.312	1	0.980769
Gm3764	0.102247	-0.262726	0.304	0.31	1	0.980645
Scaper	0.00403584	-0.305003	0.393	0.401	1	0.98005
Usp29	0.012978	-0.280195	0.386	0.395	1	0.977215
Dpp6	0.0386231	-0.420204	0.378	0.389	1	0.971722
Nrcam	2.84335e-07	-0.503313	0.562	0.579	0.00503784	0.970639
Grid1	0.00322774	-0.388666	0.444	0.458	1	0.969432
Park2	0.00615074	-0.330583	0.36	0.372	1	0.967742
Elavl3	1.20248e-05	-0.393365	0.577	0.598	0.213055	0.964883
Sema6a	1.91796e-15	-0.718528	0.647	0.671	3.39825e-11	0.964232
Git2	0.0759388	-0.280042	0.408	0.424	1	0.962264
Unc79	0.00110978	-0.323243	0.43	0.447	1	0.961968
Astn1	0.000557274	-0.348021	0.491	0.511	1	0.960861
Ccny	0.0322574	-0.271721	0.363	0.378	1	0.960317
Zfpm2	1.85922e-14	-1.15732	0.672	0.702	3.29417e-10	0.957265
Kif1a	0.0878463	-0.273701	0.357	0.373	1	0.957104
Dcx	3.25806e-07	-0.464773	0.519	0.543	0.00577263	0.955801
Smarca2	0.134347	-0.264633	0.302	0.316	1	0.955696
Stau2	0.0194491	-0.282165	0.421	0.441	1	0.954648
Gap43	0.0919291	-0.321999	0.315	0.33	1	0.954545
Kdm6b	0.131895	-0.257999	0.31	0.325	1	0.953846
Celsr2	0.00012463	-0.279849	0.388	0.407	1	0.953317
Mxi1	0.171455	-0.280891	0.338	0.355	1	0.952112
Nmnat2	0.850192	-0.269012	0.29	0.306	1	0.947712
Adgrl3	9.80706e-14	-0.595384	0.645	0.681	1.73761e-09	0.947136
Mapk10	1.31153e-14	-0.501675	0.589	0.623	2.32377e-10	0.945425
Oxr1	0.905336	-0.259006	0.238	0.252	1	0.944444
Zdhhc14	0.0528231	-0.332425	0.321	0.34	1	0.944117
Tmem63b	0.059009	-0.260222	0.296	0.314	1	0.942675
Atp6v0a1	0.00103204	-0.266784	0.304	0.323	1	0.941176
Kcnj6	6.99055e-06	-0.528269	0.462	0.491	0.123859	0.940937
Cnksr2	0.000121381	-0.491814	0.54	0.574	1	0.940766
Galnt13	0.189084	-0.391478	0.349	0.371	1	0.940701
Stxbp1	0.0313747	-0.294003	0.315	0.335	1	0.940298
Ppfia2	1.07239e-13	-0.670274	0.609	0.648	1.90007e-09	0.939815
Gpcpd1	0.120994	-0.38829	0.249	0.265	1	0.939622
Myt1l	0.00902994	-0.319147	0.413	0.44	1	0.938636
Arhgef10l	0.0225544	-0.277179	0.316	0.337	1	0.937685
Sema6d	0.00867696	-0.532157	0.434	0.463	1	0.937365
Plcb1	2.85402e-24	-0.783469	0.688	0.735	5.05676e-20	0.936054
Zfp423	3.41397e-08	-0.509206	0.51	0.545	0.000604888	0.93578
Ppm1l	0.135802	-0.361362	0.438	0.469	1	0.933902
Hells	0.339819	-0.273482	0.211	0.226	1	0.933628
Adam10	0.00792741	-0.307593	0.35	0.375	1	0.933333
Ube2h	0.0577973	-0.296056	0.334	0.358	1	0.932961
Lhfpl3	0.43298	-1.05803	0.15	0.161	1	0.931676
Dgki	0.020741	-0.291097	0.351	0.377	1	0.931034
Nfat5	0.431233	-0.269625	0.344	0.37	1	0.929729
Zmynd8	0.000420967	-0.387979	0.433	0.466	1	0.929184
Adam22	5.72652e-06	-0.400524	0.466	0.502	0.101462	0.928287
Pak7	6.85648e-14	-0.619408	0.591	0.637	1.21483e-09	0.927786
Ube2e2	3.09111e-11	-0.472754	0.638	0.689	5.47683e-07	0.92598
Slc17a6	0.0127595	-0.344223	0.371	0.401	1	0.925187
Clvs1	4.06077e-06	-0.454129	0.454	0.491	0.0719488	0.924643
Adgrl2	1.50217e-05	-0.35048	0.378	0.41	0.266154	0.921951
Apbb2	0.104132	-0.386699	0.283	0.307	1	0.921824
Tnik	7.12491e-26	-0.922652	0.693	0.752	1.26239e-21	0.921542
Sorbs1	4.97758e-11	-0.658484	0.561	0.61	8.81928e-07	0.919672
Chst11	0.38657	-0.273637	0.158	0.172	1	0.918604
Pkia	0.000997228	-0.325957	0.337	0.368	1	0.915761
Sh3gl2	3.20894e-06	-0.555468	0.512	0.56	0.056856	0.914286
Pid1	0.00458733	-0.403798	0.295	0.323	1	0.913312
Mkl2	0.0725371	-0.280019	0.214	0.235	1	0.910638
Rps6ka3	0.00211698	-0.454051	0.365	0.401	1	0.910224
L3mbtl4	6.81588e-05	-0.251719	0.18	0.198	1	0.90909
Sgip1	4.46576e-05	-0.404959	0.405	0.446	0.791243	0.908072
Gucy1a2	0.00877	-0.330629	0.348	0.384	1	0.90625
Dlgap4	0.0267278	-0.297196	0.304	0.336	1	0.904762
Ophn1	0.0267697	-0.383131	0.346	0.383	1	0.903394
Hivep2	4.81665e-06	-0.538192	0.466	0.516	0.0853414	0.903101
Kctd1	0.0646145	-0.252147	0.222	0.246	1	0.902439
Fam107b	0.00582954	-0.262884	0.212	0.235	1	0.902127
Epn2	0.07135	-0.253823	0.164	0.182	1	0.901098
Gmds	0.305369	-0.294522	0.306	0.341	1	0.89736
Gabbr1	0.00020073	-0.299925	0.293	0.328	1	0.893292
Gabrb3	1.59362e-06	-0.435431	0.459	0.514	0.0282357	0.892996
Xkr6	0.00441394	-0.484912	0.392	0.439	1	0.892938
Ahcyl2	0.976383	-0.262362	0.248	0.278	1	0.892086
Frmd5	2.15966e-12	-0.547922	0.47	0.527	3.82649e-08	0.89184
Baz2a	0.0629746	-0.259747	0.272	0.305	1	0.891803
Lig1	0.178608	-0.265	0.196	0.22	1	0.890909
Syne1	0.584072	-0.581941	0.242	0.272	1	0.889706
Gpm6a	5.84665e-14	-0.737244	0.532	0.598	1.03591e-09	0.889632
Adcy5	0.00213866	-0.276376	0.222	0.25	1	0.888
Nova2	0.000511649	-0.37399	0.339	0.382	1	0.887434
Stxbp5l	9.05167e-07	-0.663013	0.433	0.488	0.0160377	0.887295
Fhit	0.0151398	-0.421599	0.267	0.301	1	0.887043
Add2	2.38811e-05	-0.340619	0.301	0.34	0.423126	0.885294
Crebrf	0.00233992	-0.272505	0.245	0.277	1	0.884476
Eml5	1.4829e-05	-0.442521	0.386	0.438	0.262741	0.881278
Kcnc3	0.0120855	-0.308695	0.249	0.284	1	0.87676
Rapgef4	0.603314	-0.325368	0.156	0.178	1	0.876404
Asxl3	6.78176e-05	-0.412085	0.388	0.443	1	0.875846
Zswim8	0.140977	-0.255607	0.218	0.25	1	0.872
Rab6b	3.18133e-06	-0.500765	0.377	0.434	0.0563668	0.868663
Washc2	0.000418373	-0.279792	0.238	0.274	1	0.868613
Gm9801	0.00252266	-0.360811	0.281	0.325	1	0.864615
Cadps2	6.63277e-06	-1.03033	0.4	0.463	0.117519	0.863931
Dlgap3	0.0223774	-0.327205	0.279	0.323	1	0.863777
Gm20696	2.11468e-05	-0.504592	0.38	0.441	0.37468	0.861678
Cacna1b	1.38455e-05	-0.484511	0.379	0.44	0.245314	0.861363
Cacna1d	0.00189393	-0.418732	0.341	0.396	1	0.861111
Tspoap1	0.00972239	-0.268878	0.215	0.25	1	0.86
Dmxl2	0.000563217	-0.417133	0.347	0.404	1	0.858911
Igfbpl1	0.000168276	-0.392316	0.28	0.326	1	0.858895
Ppp1r14c	1.49099e-05	-0.572809	0.334	0.389	0.264173	0.858612
Plppr1	2.10319e-17	-0.79924	0.53	0.619	3.72643e-13	0.85622
Uncx	0.101473	-0.300061	0.207	0.242	1	0.855372
Dscaml1	1.56975e-16	-0.716326	0.49	0.573	2.78129e-12	0.855148
Rorb	0.296204	-0.250246	0.146	0.171	1	0.853801
Myo1b	0.171151	-0.468541	0.257	0.302	1	0.850993
Wnk2	0.000150233	-0.414056	0.319	0.375	1	0.850666
Tenm2	0.0197388	-0.425717	0.208	0.245	1	0.848979
Fgf14	0.000328483	-1.17321	0.287	0.34	1	0.844117
Kctd8	0.00966478	-0.452046	0.226	0.268	1	0.843283
Fam49b	0.00433718	-0.289626	0.185	0.22	1	0.840909
Mapt	0.000990164	-0.345024	0.205	0.244	1	0.840164
Rcor2	0.00543592	-0.299447	0.197	0.235	1	0.838298
Ypel2	0.00739168	-0.252658	0.17	0.203	1	0.837438
Mgat4c	0.00234728	-0.572586	0.24	0.287	1	0.836237
Susd6	0.0100225	-0.330927	0.219	0.262	1	0.835878
Unc13a	0.00391186	-0.369897	0.254	0.304	1	0.835526
Kcnh8	0.000478699	-0.364915	0.213	0.255	1	0.835294
Tcte2	0.000496058	-0.31152	0.19	0.228	1	0.833333
Fnip2	0.0164282	-0.261854	0.18	0.216	1	0.833333
Mcm6	0.0789391	-0.267192	0.143	0.172	1	0.831395
Kidins220	3.41514e-08	-0.483309	0.32	0.386	0.000605095	0.829015
Grik4	0.0482519	-0.332407	0.169	0.204	1	0.828431
Dopey1	0.0203842	-0.332297	0.26	0.314	1	0.828025
Slco5a1	0.00188129	-0.284189	0.166	0.201	1	0.82587
Pcmtd2	7.554e-05	-0.257722	0.164	0.199	1	0.82412
Igsf21	2.58645e-07	-0.503658	0.309	0.376	0.00458266	0.821808
Dscam	0.000305265	-0.753479	0.257	0.313	1	0.821086
Sept3	7.086e-09	-0.496813	0.312	0.38	0.00012555	0.821052
Bin1	3.59464e-07	-0.490311	0.324	0.395	0.00636898	0.820253
Mbp	0.0544038	-0.654222	0.18	0.22	1	0.818181
Stard9	0.000155972	-0.396023	0.256	0.313	1	0.817891
Eml6	0.00506347	-0.33114	0.22	0.269	1	0.817844
Dock9	0.75234	-0.462961	0.13	0.159	1	0.81761
Prkca	0.000228418	-0.364124	0.174	0.213	1	0.816901
Tmtc2	6.86069e-22	-0.921461	0.486	0.596	1.21558e-17	0.815436
Pclo	1.61801e-07	-0.645194	0.382	0.469	0.00286679	0.814499
Tnfrsf21	0.0211419	-0.293183	0.18	0.221	1	0.814479
Dlg4	0.101857	-0.263833	0.166	0.204	1	0.813725
Cttnbp2	0.000261999	-0.375051	0.235	0.289	1	0.813149
Adam23	0.0449778	-0.260535	0.146	0.18	1	0.811111
Opcml	1.98847e-09	-1.27496	0.377	0.465	3.52317e-05	0.810753
Rnf150	6.10173e-08	-0.413657	0.255	0.315	0.0010811	0.809524
Epb41l4a	0.000164865	-0.304512	0.144	0.178	1	0.808988
Map6	0.0126753	-0.279469	0.163	0.202	1	0.80693
Glce	1.39376e-08	-0.647909	0.326	0.405	0.000246946	0.804938
Apba1	9.8091e-09	-0.631098	0.34	0.423	0.000173798	0.803782
Ano4	0.000901401	-0.418671	0.192	0.239	1	0.803347
Neurod1	2.56188e-10	-0.621123	0.26	0.324	4.53913e-06	0.802469
Efr3b	0.0115829	-0.384734	0.216	0.27	1	0.8
Osbpl6	0.000163112	-0.31627	0.198	0.248	1	0.798387
Cers6	0.000126432	-0.359874	0.2	0.251	1	0.796812
Ralyl	1.14383e-06	-0.659688	0.269	0.338	0.0202664	0.795858
Otud7a	5.80406e-08	-0.556317	0.33	0.415	0.00102836	0.795181
Ptpro	0.000952244	-0.363351	0.169	0.213	1	0.793427
Sorbs2	0.00588639	-0.526939	0.154	0.195	1	0.789743
Sphkap	4.6761e-10	-0.596698	0.285	0.361	8.28512e-06	0.789473
Snhg14	1.72034e-07	-0.684757	0.307	0.389	0.0030481	0.789203
Slc24a3	0.00119761	-0.47475	0.181	0.23	1	0.786956
Ptprj	0.00083207	-0.469089	0.187	0.238	1	0.785714
Mapk4	0.00415103	-0.366185	0.156	0.199	1	0.783919
Scrt2	0.0307428	-0.294951	0.146	0.187	1	0.780748
Cnksr3	0.00129672	-0.319265	0.134	0.172	1	0.779069
Nrep	0.00367128	-0.411189	0.214	0.275	1	0.778182
Tanc1	0.252978	-0.267443	0.126	0.162	1	0.777777
Nos1ap	0.000730691	-0.278489	0.147	0.19	1	0.773684
Thra	0.00284166	-0.356903	0.182	0.236	1	0.771186
Ankrd12	2.15148e-06	-0.447934	0.251	0.326	0.0381199	0.769938
Mcf2l	3.1506e-05	-0.417174	0.177	0.23	0.558224	0.769565
Rims1	7.98319e-17	-0.904021	0.397	0.516	1.41446e-12	0.76938
Zfp804a	0.00967088	-0.403655	0.186	0.242	1	0.768595
Kif21b	9.04828e-07	-0.403147	0.195	0.254	0.0160317	0.767716
Plcl1	2.9879e-10	-0.768109	0.324	0.424	5.29396e-06	0.764151
Slc44a1	4.13865e-06	-0.502259	0.243	0.318	0.0733286	0.764151
St6galnac3	0.000480081	-0.620721	0.243	0.318	1	0.764151
Nhlh1	0.0478063	-0.289617	0.127	0.167	1	0.760479
Ina	0.462284	-0.32355	0.139	0.183	1	0.759562
Kdm5b	2.18262e-07	-0.498222	0.26	0.343	0.00386717	0.758017
Arhgap44	0.00013501	-0.351338	0.172	0.227	1	0.757709
Pcdha11	0.0106153	-0.378091	0.166	0.22	1	0.754545
Arpp21	5.75209e-19	-1.33209	0.322	0.427	1.01915e-14	0.754098
Obscn	7.05174e-05	-0.493967	0.171	0.227	1	0.753304
Tenm1	0.00546491	-0.571139	0.171	0.227	1	0.753304
Ptprn2	1.42073e-24	-0.754837	0.415	0.551	2.51724e-20	0.753176
Kcnq2	6.66275e-07	-0.422877	0.204	0.272	0.0118051	0.75
Herc3	0.0242262	-0.251631	0.122	0.163	1	0.748466
Aig1	7.39566e-05	-0.453164	0.205	0.274	1	0.748175
Nkain1	2.30044e-06	-0.452607	0.204	0.273	0.0407592	0.747252
Cpeb4	0.00174131	-0.35025	0.177	0.238	1	0.743697
Stmn2	4.1686e-09	-0.519649	0.232	0.313	7.38592e-05	0.741214
Parp8	0.000242118	-0.390763	0.185	0.251	1	0.737051
Asic2	0.00127559	-0.58854	0.118	0.161	1	0.732919
Kcnd2	0.000195472	-1.30168	0.196	0.268	1	0.731343
Kdm7a	1.23e-05	-0.445347	0.192	0.265	0.217931	0.724528
Fnbp1	5.46906e-06	-0.583206	0.227	0.314	0.0969008	0.72293
Cacna1c	3.55281e-20	-1.09559	0.348	0.482	6.29487e-16	0.721992
Kcnk10	0.00199057	-0.40707	0.15	0.208	1	0.721153
Kif5a	4.4348e-06	-0.415311	0.167	0.234	0.0785757	0.713675
Sgsm1	7.8482e-05	-0.310039	0.114	0.16	1	0.7125
Ica1	0.00187132	-0.339261	0.133	0.187	1	0.71123
Reep1	2.17763e-07	-0.382688	0.159	0.224	0.00385833	0.709821
Plppr3	5.56174e-05	-0.322912	0.127	0.179	0.98543	0.709497
Fbxl20	6.67005e-08	-0.510891	0.234	0.33	0.0011818	0.709091
Elmo1	2.04116e-14	-0.982921	0.31	0.438	3.61653e-10	0.707762
Nrg1	2.91474e-17	-1.32264	0.346	0.489	5.16433e-13	0.707566
Mir124a-1hg	3.22635e-12	-0.672027	0.234	0.331	5.71645e-08	0.706948
Ckb	4.23941e-07	-0.378185	0.141	0.2	0.00751139	0.705
Hivep3	2.23609e-14	-0.995948	0.288	0.409	3.96191e-10	0.704156
Atxn1	8.13552e-10	-0.633779	0.248	0.353	1.44145e-05	0.702549
Camk2d	9.97386e-14	-0.785993	0.29	0.413	1.76717e-09	0.702179
Myt1	1.48163e-12	-0.702188	0.257	0.368	2.62516e-08	0.698369
Grk5	0.0284324	-0.372971	0.142	0.204	1	0.696078
Adarb1	0.000158155	-0.34714	0.133	0.192	1	0.692708
Lingo1	9.74372e-06	-0.322271	0.11	0.159	0.172639	0.691823
Map3k13	8.45778e-11	-0.572823	0.203	0.295	1.49855e-06	0.688135
Cntn2	4.42301e-31	-1.27129	0.362	0.53	7.83669e-27	0.683019
Prkg1	0.000892324	-0.82134	0.12	0.176	1	0.681818
Grin2b	4.09181e-23	-1.21468	0.302	0.443	7.24987e-19	0.681715
Ncam2	5.04696e-06	-0.718063	0.14	0.206	0.089422	0.679611
Ppp2r2b	7.94696e-16	-0.976528	0.235	0.349	1.40804e-11	0.673352
Eif2ak4	0.00334135	-0.307769	0.103	0.153	1	0.673202
Cadm3	6.60257e-10	-0.735699	0.238	0.354	1.16984e-05	0.672316
Cpeb3	3.30211e-06	-0.395352	0.144	0.215	0.0585069	0.669767
Cntnap4	0.00061548	-0.581417	0.143	0.215	1	0.665116
Vps8	1.04278e-08	-0.353691	0.115	0.173	0.00018476	0.66474
Itpr2	0.00118263	-0.528821	0.115	0.173	1	0.66474
Dgkh	0.0066337	-0.3532	0.101	0.152	1	0.664473
Ncan	0.000130267	-0.390251	0.119	0.181	1	0.657458
Fam214a	5.32666e-09	-0.483049	0.151	0.231	9.43778e-05	0.653679
Celf3	5.51027e-07	-0.495523	0.155	0.238	0.0097631	0.65126
Dopey2	1.88996e-06	-0.451336	0.146	0.225	0.0334863	0.648889
Lrp1	1.29441e-06	-0.563935	0.142	0.221	0.0229344	0.642534
Dtna	3.29302e-11	-0.563029	0.15	0.234	5.83456e-07	0.641025
Pou2f2	1.67983e-05	-0.447362	0.13	0.203	0.297632	0.640394
Nrxn2	7.02132e-12	-0.609429	0.184	0.289	1.24404e-07	0.636678
Cacnb4	9.78847e-12	-0.624541	0.163	0.257	1.73432e-07	0.634241
Prickle2	3.71953e-12	-0.648912	0.143	0.227	6.59026e-08	0.629956
March3	2.85968e-05	-0.520779	0.134	0.213	0.506678	0.629108
Map3k12	1.60341e-05	-0.340177	0.096	0.155	0.284092	0.619354
Rgs7	2.32148e-08	-0.618503	0.158	0.256	0.000411319	0.617187
Syt1	8.50063e-08	-0.658862	0.123	0.2	0.00150614	0.615
Samd12	4.79177e-25	-1.19989	0.271	0.443	8.49006e-21	0.611738
Srgap3	2.7542e-28	-0.983232	0.258	0.422	4.8799e-24	0.611374
Camk4	0.000277509	-0.558559	0.099	0.162	1	0.611111
Dpysl3	5.72223e-08	-0.49147	0.123	0.203	0.00101386	0.605911
Gpr158	4.19138e-20	-0.902579	0.224	0.37	7.4263e-16	0.605405
Chd3	3.29154e-08	-0.352914	0.095	0.157	0.000583195	0.605095
Rundc3b	4.47764e-06	-0.355813	0.101	0.167	0.0793349	0.60479
Syn3	2.4595e-12	-0.903663	0.179	0.298	4.35774e-08	0.600671
Plxdc2	0.000559303	-0.700606	0.111	0.185	1	0.6
Luzp2	5.13749e-10	-0.823659	0.145	0.246	9.10261e-06	0.589431
Lzts1	9.37949e-10	-0.601614	0.137	0.238	1.66186e-05	0.57563
Nrxn3	2.38748e-14	-1.38812	0.171	0.299	4.23013e-10	0.571906
Atp9a	1.089e-08	-0.408547	0.1	0.175	0.000192949	0.571428
Syt9	1.04879e-05	-0.405283	0.09	0.158	0.185824	0.56962
Taok3	9.51573e-08	-0.401541	0.096	0.169	0.001686	0.568047
Mmp24	2.01389e-11	-0.673837	0.144	0.256	3.56821e-07	0.5625
Epb41l1	1.05527e-18	-0.842711	0.158	0.281	1.86973e-14	0.562277
Brinp1	7.19828e-10	-0.718817	0.138	0.247	1.27539e-05	0.558704
Adcy9	1.06743e-06	-0.366214	0.083	0.15	0.0189128	0.553333
Synpr	8.06161e-20	-0.997386	0.201	0.364	1.42836e-15	0.552198
Nyap2	2.49256e-15	-0.712419	0.147	0.267	4.41632e-11	0.550562
Cacna1e	5.47416e-16	-1.34666	0.177	0.322	9.69912e-12	0.549689
Unc5d	7.97454e-13	-0.948245	0.124	0.231	1.41293e-08	0.536796
Phactr3	2.4818e-10	-0.444053	0.082	0.153	4.39725e-06	0.535947
Pdzrn3	3.88381e-09	-0.696685	0.12	0.224	6.88133e-05	0.535714
Cyfip2	1.60925e-13	-0.576346	0.103	0.196	2.85126e-09	0.52551
Nfasc	6.95075e-16	-1.08326	0.154	0.295	1.23153e-11	0.522034
Apc2	2.60766e-06	-0.480332	0.089	0.173	0.0462025	0.514451
Ephb1	6.39212e-18	-1.16116	0.142	0.278	1.13256e-13	0.510791
Chrm3	3.03839e-06	-0.663471	0.086	0.17	0.0538341	0.505882
Ndst3	7.73993e-17	-0.921708	0.135	0.267	1.37136e-12	0.505618
Atp8a2	4.81559e-09	-0.454953	0.08	0.16	8.53226e-05	0.5
Wscd2	8.90272e-13	-0.589816	0.089	0.181	1.57738e-08	0.491712
Cacna1a	1.61608e-27	-1.17097	0.16	0.331	2.86337e-23	0.483384
Spock1	3.33267e-08	-0.657157	0.074	0.154	0.000590483	0.480519
Lrp1b	3.35019e-17	-1.43641	0.107	0.223	5.93586e-13	0.47982
Slc4a4	2.43985e-08	-0.871545	0.078	0.163	0.000432292	0.478527
Ppm1h	1.62558e-25	-1.18608	0.181	0.379	2.8802e-21	0.477572
Unc5c	1.62917e-25	-1.49727	0.137	0.291	2.88656e-21	0.47079
Cntn1	2.35078e-19	-0.832214	0.095	0.203	4.16511e-15	0.46798
Hcn1	7.17779e-08	-0.609716	0.077	0.167	0.00127176	0.461078
Snap91	3.3901e-23	-0.679031	0.101	0.232	6.00658e-19	0.435345
Adamtsl3	5.58131e-14	-0.808462	0.087	0.208	9.88896e-10	0.418269
Car10	4.35978e-15	-1.45899	0.092	0.222	7.72465e-11	0.414414
Zmat4	1.84076e-14	-0.815188	0.065	0.168	3.26147e-10	0.386905
Srcin1	8.60066e-18	-0.653987	0.074	0.192	1.52386e-13	0.385416
Gabbr2	1.04784e-15	-0.843393	0.071	0.195	1.85656e-11	0.364102
Nol4l	3.70715e-17	-0.615168	0.064	0.176	6.56833e-13	0.363636
Ntrk2	7.66486e-20	-0.956081	0.088	0.244	1.35806e-15	0.360656
Ryr2	8.94312e-17	-1.02564	0.067	0.189	1.58454e-12	0.354497
Lrrc4c	9.45906e-20	-1.531	0.077	0.218	1.67596e-15	0.353211
Grm1	1.12817e-23	-0.991171	0.037	0.159	1.99889e-19	0.232704

## Sheet: cluster 2
gene	p_val	avg_log2FC	fraction + in cluster	fraction + not in cluster	p_val_adj	ratio + in:out of cluster
Spock1	3.02538e-20	1.37441	0.304	0.122	5.36037e-16	2.4918
Hrk	1.9666e-09	0.726246	0.158	0.074	3.48442e-05	2.13513
Chrna3	1.51207e-09	0.699264	0.22	0.117	2.67908e-05	1.88034
Prune2	9.22521e-11	0.86536	0.223	0.12	1.63452e-06	1.85833
Obscn	8.43742e-22	1.0542	0.358	0.202	1.49494e-17	1.77228
Vav3	3.69919e-10	0.715653	0.193	0.111	6.55422e-06	1.73874
Nrn1	6.36957e-20	0.831084	0.356	0.215	1.12856e-15	1.65581
Cntn2	3.71067e-51	1.09323	0.749	0.476	6.57457e-47	1.57353
Slc17a6	1.10527e-39	0.985151	0.577	0.373	1.95831e-35	1.54692
Pdzrn3	1.49729e-12	0.663595	0.302	0.199	2.65291e-08	1.51759
Fbxo32	9.56394e-05	0.511997	0.2	0.135	1	1.48148
Nkain1	2.26306e-08	0.761051	0.367	0.25	0.000400969	1.468
Srrm3	4.23445e-18	0.941751	0.531	0.368	7.50259e-14	1.44293
C1ql1	1.55221e-05	0.548443	0.247	0.173	0.275021	1.42774
Eln	1.66327e-07	0.760338	0.298	0.21	0.00294698	1.41905
Enox2	3.37823e-26	1.10326	0.525	0.371	5.98554e-22	1.41509
Schip1	5.08169e-15	0.787611	0.406	0.289	9.00374e-11	1.40484
Plppr1	1.50249e-54	1.09142	0.805	0.58	2.66212e-50	1.38793
Brinp1	2.76995e-09	0.659817	0.307	0.223	4.9078e-05	1.37668
Igfbpl1	3.02914e-17	0.705175	0.42	0.307	5.36704e-13	1.36808
Srgap3	3.98683e-17	0.768794	0.525	0.384	7.06387e-13	1.36719
Tubb3	7.11621e-07	0.380296	0.164	0.12	0.0126085	1.36667
Fam20c	0.00501343	0.419592	0.172	0.127	1	1.35433
Nnat	2.98842e-15	0.841893	0.42	0.312	5.29488e-11	1.34615
Lhx1	2.0056e-10	0.671563	0.387	0.288	3.55352e-06	1.34375
Tspoap1	1.86859e-09	0.579971	0.315	0.236	3.31077e-05	1.33475
Lingo1	0.0108379	0.482466	0.196	0.147	1	1.33333
Lzts1	2.94195e-08	0.587967	0.287	0.217	0.000521254	1.32258
Gm26953	2.26151e-05	0.50626	0.252	0.192	0.400694	1.3125
Uncx	0.000158852	0.513899	0.299	0.229	1	1.30568
Csrp1	0.00910382	0.421378	0.17	0.132	1	1.28788
Miat	1.73957e-78	0.975825	0.897	0.699	3.08218e-74	1.28326
Gpr158	1.65993e-10	0.577673	0.436	0.34	2.94106e-06	1.28235
Nhlh2	4.59494e-08	0.562484	0.317	0.248	0.000814131	1.27823
Adarb2	4.62679e-39	1.12396	0.743	0.584	8.19774e-35	1.27226
Dscaml1	1.33719e-26	0.778216	0.691	0.545	2.36922e-22	1.26789
Nhlh1	0.00325755	0.399877	0.199	0.157	1	1.26752
Cntnap1	7.94173e-06	0.636837	0.43	0.34	0.140712	1.26471
Rcor2	8.4008e-05	0.485848	0.282	0.223	1	1.26457
Arid3a	0.483027	0.39403	0.187	0.148	1	1.26351
Lhx1os	1.43748e-06	0.582039	0.351	0.281	0.0254694	1.24911
Stmn2	8.2653e-09	0.492386	0.366	0.294	0.000146445	1.2449
Myt1	3.3531e-15	0.474895	0.428	0.344	5.94102e-11	1.24419
Tmem163	7.70151e-31	0.805684	0.769	0.62	1.36455e-26	1.24032
Col11a1	2.2392e-14	0.781099	0.588	0.478	3.96741e-10	1.23013
Tmem196	0.062613	0.451626	0.211	0.174	1	1.21264
Elavl3	1.13776e-21	0.698012	0.702	0.581	2.01589e-17	1.20826
Plekha6	3.69668e-29	0.719949	0.662	0.549	6.54978e-25	1.20583
Pak7	2.22944e-22	0.701932	0.741	0.617	3.95012e-18	1.20097
Slc8a2	0.979838	0.351498	0.163	0.136	1	1.19853
Xkr6	3.98546e-16	0.629887	0.506	0.424	7.06145e-12	1.1934
Rab6b	1.22602e-11	0.553973	0.496	0.417	2.17225e-07	1.18945
Ncan	0.145046	0.34012	0.201	0.169	1	1.18935
Mapk10	9.67683e-29	0.688061	0.714	0.606	1.71454e-24	1.17822
Kcnq2	0.0248686	0.426804	0.303	0.258	1	1.17442
Nova2	2.69348e-07	0.510063	0.433	0.369	0.0047723	1.17344
Gm38399	1.4863e-36	0.77079	0.755	0.645	2.63343e-32	1.17054
Arhgef10l	1.83193e-07	0.507639	0.383	0.328	0.00324582	1.16768
Ltbp3	0.0148044	0.433902	0.265	0.227	1	1.1674
Zfp423	1.02238e-18	0.621695	0.618	0.53	1.81146e-14	1.16604
Nyap2	0.000584603	0.336464	0.288	0.247	1	1.16599
Kalrn	2.09358e-16	0.642716	0.611	0.525	3.70941e-12	1.16381
Thsd7a	8.19393e-105	1.46296	0.936	0.806	1.4518e-100	1.16129
Islr2	0.0607304	0.370162	0.211	0.182	1	1.15934
Map3k13	0.00100537	0.470733	0.322	0.278	1	1.15827
Ccbe1	2.10736e-05	0.594638	0.363	0.314	0.373382	1.15605
Pid1	3.47504e-05	0.666686	0.363	0.314	0.615707	1.15605
Pou2f2	8.07806e-05	0.356241	0.219	0.19	1	1.15263
Nrxn3	0.0017527	0.390516	0.319	0.277	1	1.15162
Pde1c	2.21234e-120	1.27669	0.97	0.844	3.91982e-116	1.14929
Plppr3	0.0042829	0.334333	0.194	0.169	1	1.14793
Scrt2	0.0189335	0.348337	0.205	0.179	1	1.14525
Barhl1	4.8704e-07	0.454124	0.442	0.386	0.00862938	1.14508
Plxna3	0.0166033	0.351799	0.206	0.18	1	1.14444
Dcx	6.89971e-16	0.456016	0.607	0.531	1.22249e-11	1.14313
Ntn1	3.46166e-18	0.575546	0.757	0.664	6.13336e-14	1.14006
Eml5	9.85878e-09	0.54321	0.483	0.425	0.000174678	1.13647
Kif21b	0.0304145	0.368099	0.276	0.243	1	1.1358
Kcnip4	0.00770716	0.435657	0.251	0.221	1	1.13575
Map6	0.0192237	0.330197	0.22	0.194	1	1.13402
Ptprn2	1.45233e-10	0.527025	0.595	0.525	2.57324e-06	1.13333
Ddr1	0.00862675	0.436473	0.343	0.304	1	1.12829
Adgrg1	0.000909348	0.467803	0.393	0.349	1	1.12607
Podxl2	0.0154318	0.409644	0.288	0.256	1	1.125
Ptprs	5.95426e-38	0.654552	0.869	0.774	1.05498e-33	1.12274
Ano4	0.114632	0.416517	0.257	0.229	1	1.12227
Cacna1b	1.1789e-10	0.441614	0.478	0.426	2.08877e-06	1.12207
Kif5a	0.100698	0.352324	0.249	0.222	1	1.12162
Afap1	5.8427e-12	0.498316	0.481	0.429	1.03521e-07	1.12121
Clvs1	4.75671e-07	0.332599	0.536	0.48	0.00842794	1.11667
Rab3c	1.30525e-05	0.48309	0.547	0.492	0.231265	1.11179
Celf3	0.00158139	0.313887	0.249	0.224	1	1.11161
Ebf3	4.23127e-24	0.586877	0.88	0.792	7.49696e-20	1.11111
Rmst	0.000231607	0.467135	0.29	0.261	1	1.11111
Zmynd8	5.45533e-11	0.518685	0.506	0.456	9.66576e-07	1.10965
Kif5c	5.16338e-16	0.493909	0.719	0.648	9.14848e-12	1.10957
Elavl4	4.84051e-05	0.441095	0.376	0.339	0.857642	1.10914
Astn1	5.02412e-07	0.459727	0.556	0.502	0.00890174	1.10757
Prickle2	0.0228059	0.409639	0.237	0.214	1	1.10748
Prkcb	5.11367e-38	0.638418	0.91	0.824	9.0604e-34	1.10437
Clmp	1.10975e-06	0.516626	0.51	0.462	0.0196625	1.1039
Tnik	3.01994e-13	0.289706	0.811	0.735	5.35072e-09	1.1034
Adcy5	0.00300688	0.387923	0.268	0.243	1	1.10288
Dapk1	1.11964e-12	0.517302	0.546	0.496	1.98378e-08	1.10081
Rundc3a	0.762601	0.309508	0.198	0.18	1	1.1
Bin1	6.05646e-07	0.391995	0.42	0.382	0.0107308	1.09948
Tmem178b	6.19493e-31	0.623231	0.871	0.795	1.09762e-26	1.0956
Wscd2	0.200589	0.328685	0.184	0.168	1	1.09524
Kdm5b	0.0404259	0.382936	0.36	0.329	1	1.09422
Crmp1	0.00918862	0.431028	0.49	0.449	1	1.09131
Ctif	6.41088e-13	0.510886	0.632	0.58	1.13588e-08	1.08965
Man1c1	4.63566e-12	0.460137	0.828	0.76	8.21347e-08	1.08947
Apc	7.62028e-30	0.537582	0.841	0.772	1.35016e-25	1.08938
Dlg4	0.078478	0.322588	0.214	0.197	1	1.08629
Add2	0.00026045	0.384775	0.36	0.332	1	1.08434
Slc29a1	0.00910211	0.392927	0.412	0.38	1	1.08421
Ckb	0.0126662	0.305933	0.207	0.191	1	1.08377
Nav1	3.77612e-55	0.762159	0.92	0.849	6.69052e-51	1.08363
Edil3	2.61831e-09	0.465199	0.694	0.641	4.63911e-05	1.08268
Klf12	1.17006e-34	0.623009	0.891	0.824	2.07312e-30	1.08131
H13	0.0347591	0.362989	0.306	0.284	1	1.07746
Gm20696	0.00150427	0.348624	0.462	0.429	1	1.07692
Cdh12	0.924261	0.369286	0.187	0.174	1	1.07471
Sphkap	0.00027854	0.453951	0.373	0.348	1	1.07184
Map2	4.1472e-27	0.492187	0.892	0.834	7.34801e-23	1.06954
Dpysl4	0.133561	0.376586	0.277	0.259	1	1.0695
Samd12	0.000207281	0.402292	0.447	0.418	1	1.06938
Nav3	1.3794e-13	0.462804	0.803	0.751	2.44403e-09	1.06924
Gse1	6.28393e-12	0.365508	0.882	0.827	1.11339e-07	1.06651
Rgmb	4.96109e-05	0.350412	0.258	0.242	0.879006	1.06612
Nrxn2	0.00968868	0.302824	0.291	0.273	1	1.06593
Ctnna2	9.62759e-13	0.330708	0.935	0.88	1.70582e-08	1.0625
Enox1	2.94926e-12	0.364588	0.782	0.736	5.2255e-08	1.0625
Pcsk2	0.235642	0.417038	0.393	0.37	1	1.06216
Sgip1	0.000153627	0.396255	0.465	0.438	1	1.06164
Basp1	5.74615e-09	0.396307	0.603	0.569	0.00010181	1.05975
Maml3	1.41857e-36	0.596053	0.93	0.878	2.51342e-32	1.05923
Kdm6b	0.00100066	0.347724	0.34	0.321	1	1.05919
Sox11	1.47382e-05	0.368313	0.575	0.544	0.261132	1.05699
Ank3	8.36574e-50	0.609431	0.974	0.922	1.48224e-45	1.0564
Tox3	2.6761e-07	0.41315	0.7	0.663	0.00474151	1.05581
Ppp2r2c	6.61129e-06	0.363472	0.671	0.637	0.117139	1.05338
Nav2	1.60912e-72	0.684257	0.995	0.947	2.85104e-68	1.05069
Cxxc5	0.00398716	0.364496	0.335	0.319	1	1.05016
Akap6	1.04301e-64	0.66689	0.987	0.941	1.848e-60	1.04888
Slc1a2	0.000268021	0.302562	0.647	0.617	1	1.04862
Ppfia2	7.74025e-05	0.314091	0.67	0.639	1	1.04851
Hs3st5	2.31143e-07	0.408477	0.818	0.781	0.0040954	1.04738
Cacng2	3.69012e-05	0.289932	0.669	0.639	0.653816	1.04695
Coro2b	4.19739e-08	0.419324	0.68	0.65	0.000743694	1.04615
Bicd1	9.12432e-06	0.385282	0.574	0.549	0.161665	1.04554
Pbx3	1.28326e-15	0.416932	0.875	0.837	2.27368e-11	1.0454
Xkr4	0.00410583	0.273131	0.696	0.666	1	1.04504
Gria4	1.7233e-11	0.327002	0.882	0.844	3.05334e-07	1.04502
Hdac9	7.24686e-10	0.325373	0.717	0.689	1.284e-05	1.04064
Rassf4	0.00510783	0.377929	0.464	0.446	1	1.04036
March3	0.850687	0.342679	0.21	0.202	1	1.0396
Zeb1	1.55624e-16	0.309397	0.974	0.937	2.75735e-12	1.03949
Celsr3	0.0146647	0.326045	0.434	0.418	1	1.03828
Meis1	2.79214e-09	0.267442	0.912	0.879	4.94712e-05	1.03754
Setbp1	4.20301e-37	0.460715	0.976	0.941	7.44689e-33	1.03719
Atp2b2	0.000147909	0.357873	0.478	0.461	1	1.03688
Slco5a1	0.117233	0.28788	0.202	0.195	1	1.0359
Trak1	2.94559e-05	0.394804	0.549	0.53	0.521899	1.03585
Brsk2	0.731785	0.324602	0.377	0.364	1	1.03571
Nol4	4.22804e-10	0.30043	0.821	0.793	7.49125e-06	1.03531
Unc79	0.000316142	0.303942	0.458	0.443	1	1.03386
Myo16	1.75018e-07	0.310276	0.847	0.82	0.00310097	1.03293
Nfix	1.08136e-11	0.328469	0.861	0.834	1.91595e-07	1.03237
Cacna2d1	5.46179e-50	0.50238	0.996	0.965	9.6772e-46	1.03212
Pik3r3	0.00916876	0.33234	0.45	0.436	1	1.03211
Fam214a	0.142042	0.271833	0.227	0.22	1	1.03182
Rab30	0.165961	0.344661	0.296	0.287	1	1.03136
Erbb4	1.00468e-18	0.439613	0.938	0.91	1.7801e-14	1.03077
Clip2	0.021073	0.312863	0.268	0.26	1	1.03077
Ctnnd2	2.42464e-16	0.361384	0.932	0.905	4.29598e-12	1.02983
Nlgn1	5.04313e-11	0.331561	0.867	0.843	8.93541e-07	1.02847
Ccser1	3.12252e-13	0.33772	0.899	0.876	5.53248e-09	1.02626
Astn2	1.86909e-16	0.356192	0.903	0.88	3.31165e-12	1.02614
B3galt1	4.28512e-13	0.341455	0.824	0.804	7.59237e-09	1.02488
Snap25	4.09918e-05	0.293285	0.583	0.569	0.726293	1.0246
Pbx1	0.000468444	0.334284	0.882	0.861	1	1.02439
Ina	0.262745	0.252107	0.181	0.177	1	1.0226
Plcb1	1.27292e-06	0.430033	0.743	0.727	0.0225536	1.02201
Nek6	0.325197	0.254854	0.186	0.182	1	1.02198
Sema7a	0.0121292	0.358633	0.525	0.514	1	1.0214
Plxnb2	0.183039	0.334115	0.402	0.394	1	1.0203
Msi1	0.627024	0.290201	0.266	0.261	1	1.01916
Ahdc1	0.0112918	0.349246	0.492	0.483	1	1.01863
Ephb2	0.00190817	0.300316	0.553	0.543	1	1.01842
Dcc	5.99355e-159	1.10852	0.999	0.981	1.06194e-154	1.01835
Ssbp3	0.00338883	0.334612	0.565	0.556	1	1.01619
Kdm7a	0.120183	0.258908	0.259	0.255	1	1.01569
Gm9801	0.603275	0.293098	0.324	0.319	1	1.01567
Chd4	4.24107e-06	0.315414	0.701	0.691	0.0751433	1.01447
Cnksr2	0.0455215	0.259602	0.577	0.569	1	1.01406
Sema6d	0.000199976	0.409083	0.464	0.458	1	1.0131
Kcnh8	0.00231415	0.306265	0.253	0.25	1	1.012
Ldb1	0.440854	0.251381	0.183	0.181	1	1.01105
Scmh1	0.00187204	0.335526	0.59	0.584	1	1.01027
Mvb12b	5.73129e-09	0.322663	0.546	0.541	0.000101547	1.00924
Nfib	7.60899e-34	0.343361	0.999	0.99	1.34816e-29	1.00909
Scg5	0.0846379	0.301437	0.364	0.361	1	1.00831
Tmeff1	0.00200896	0.29623	0.397	0.394	1	1.00761
Kcnc3	0.183786	0.268113	0.281	0.279	1	1.00717
Nrcam	0.00083412	0.268261	0.579	0.576	1	1.00521
Msi2	7.80139e-06	0.354958	0.842	0.838	0.138225	1.00477
Arhgap21	7.52393e-09	0.311254	0.654	0.651	0.000133309	1.00461
Mgat4c	0.589955	0.485519	0.281	0.28	1	1.00357
Ncoa1	2.27625e-07	0.381326	0.658	0.656	0.00403306	1.00305
Dennd2a	0.110582	0.313395	0.486	0.485	1	1.00206
Rbfox3	0.0138849	-0.2584	0.879	0.879	1	1
Dach1	9.76662e-05	0.309932	0.709	0.709	1	1
Nsg2	0.808626	0.304232	0.34	0.341	1	0.997067
Usp46	0.0155902	0.290347	0.271	0.272	1	0.996323
Syt11	0.00330051	0.271667	0.325	0.327	1	0.993883
Dixdc1	0.0779499	0.30949	0.321	0.323	1	0.993808
Kmt2e	0.00013009	0.267228	0.697	0.702	1	0.992877
Celsr2	0.000313877	0.279653	0.402	0.405	1	0.992592
Asxl3	0.000995086	0.259929	0.432	0.436	1	0.990825
Dmxl2	0.0235016	0.276414	0.393	0.397	1	0.989924
Zfhx2	0.0798087	0.282934	0.279	0.282	1	0.989361
Pkia	0.581273	0.256491	0.36	0.364	1	0.989011
Cbfa2t2	0.114703	0.271121	0.522	0.528	1	0.988636
Igsf21	0.0229607	0.263149	0.363	0.368	1	0.986413
Elovl6	0.0418062	0.350007	0.357	0.362	1	0.986188
Lrba	5.18207e-06	0.325665	0.688	0.698	0.091816	0.985673
Trp53bp1	0.00875827	0.290664	0.394	0.4	1	0.985
Fbxl20	0.0789017	0.274021	0.314	0.319	1	0.984326
Syn2	0.150202	0.336734	0.373	0.379	1	0.984169
Mex3a	0.124476	0.273151	0.413	0.421	1	0.980997
Epb41	0.0106625	0.267338	0.539	0.55	1	0.98
Dlgap3	0.158749	0.268362	0.311	0.318	1	0.977987
Soga3	0.0143237	0.265992	0.442	0.452	1	0.977876
Crebrf	0.420841	0.252951	0.266	0.273	1	0.974359
Slc39a11	0.0190397	0.31183	0.455	0.468	1	0.972222
Cttnbp2	0.0472079	0.265539	0.275	0.283	1	0.971731
Ago1	0.0612551	0.260109	0.24	0.247	1	0.97166
Arhgef2	0.816787	0.265705	0.365	0.376	1	0.970744
Klf7	0.0041974	0.252717	0.535	0.557	1	0.960503
Ank	0.0141426	0.270354	0.288	0.3	1	0.96
Spire1	0.18163	0.260075	0.457	0.478	1	0.956067
Tmem178	0.225965	0.251886	0.278	0.292	1	0.952054
Tspan18	0.706357	0.264684	0.2	0.214	1	0.934579
Rbfox1	4.61418e-16	-0.588298	0.778	0.839	8.17541e-12	0.927294
Fam155a	1.45749e-23	-0.510461	0.832	0.899	2.58238e-19	0.925473
Lrrc7	5.06166e-14	-0.320043	0.802	0.869	8.96825e-10	0.9229
Ptprg	6.92628e-05	-0.283174	0.765	0.845	1	0.905325
Cdk6	2.75064e-08	-0.328671	0.712	0.801	0.000487359	0.888889
Ncor2	3.1232e-12	-0.40936	0.716	0.815	5.53368e-08	0.878527
Zfpm2	6.61449e-11	-0.772392	0.609	0.711	1.17195e-06	0.85654
Cntnap2	5.23694e-06	-0.27524	0.518	0.607	0.092788	0.853377
Grin2b	0.00992856	-0.255184	0.366	0.433	1	0.845265
Rasgef1b	0.004787	-0.284313	0.512	0.613	1	0.835236
Sox5	2.66756e-09	-0.254446	0.598	0.717	4.72639e-05	0.834031
Gsg1l	4.65252e-21	-0.540648	0.605	0.73	8.24334e-17	0.828767
Ptch1	2.16856e-39	-0.924039	0.679	0.824	3.84225e-35	0.824029
Stag1	4.47117e-11	-0.321145	0.644	0.785	7.92201e-07	0.820382
Hnrnpa2b1	4.3264e-10	-0.269173	0.612	0.748	7.66551e-06	0.818182
Sorbs1	5.99577e-06	-0.311744	0.502	0.617	0.106233	0.813614
Lhfpl3	0.00358305	-0.79791	0.133	0.164	1	0.810975
Tead1	8.04018e-05	-0.266893	0.577	0.713	1	0.809257
Sdk1	1.96941e-08	-0.276063	0.554	0.693	0.00034894	0.799423
Adgrl3	1.55472e-08	-0.422812	0.551	0.693	0.000275465	0.795094
Zfp704	1.14558e-12	-0.365621	0.566	0.712	2.02974e-08	0.794944
Cux1	6.34494e-10	-0.309656	0.553	0.707	1.1242e-05	0.782178
Sptbn1	5.25626e-05	-0.310391	0.433	0.554	0.931304	0.781588
Magi1	7.30183e-09	-0.303983	0.542	0.694	0.000129374	0.78098
Mbp	0.0975811	-0.320565	0.172	0.221	1	0.77828
Cdh4	0.000114701	-0.313036	0.438	0.568	1	0.771127
Zfp521	4.86083e-11	-0.531677	0.539	0.701	8.61241e-07	0.768901
Grid2	3.05613e-28	-0.694341	0.558	0.726	5.41485e-24	0.768595
Gm47283	1.41643e-08	-0.271926	0.412	0.544	0.000250963	0.757353
Dyrk1a	3.14233e-08	-0.254834	0.435	0.581	0.000556758	0.748709
Cdk14	4.1959e-19	-0.487101	0.547	0.736	7.4343e-15	0.743206
Ssbp2	2.56645e-07	-0.263519	0.431	0.58	0.00454724	0.743103
Klhl29	8.31601e-14	-0.605406	0.467	0.632	1.47343e-09	0.738924
Sh3gl2	5.05024e-08	-0.375277	0.422	0.572	0.000894801	0.737762
Boc	2.88047e-15	-0.499387	0.494	0.673	5.10362e-11	0.734027
Ncl	2.11558e-14	-0.268138	0.422	0.575	3.74839e-10	0.733913
Fgf13	9.74678e-12	-0.417002	0.438	0.603	1.72693e-07	0.726368
Bahcc1	2.89206e-08	-0.339488	0.379	0.526	0.000512415	0.720532
Dock1	6.51085e-18	-0.504929	0.483	0.674	1.15359e-13	0.716617
Tspan5	2.89819e-07	-0.421439	0.453	0.634	0.00513501	0.714511
Ncald	4.39944e-10	-0.260254	0.381	0.534	7.79493e-06	0.713483
Xist	4.17454e-16	-0.566976	0.316	0.443	7.39645e-12	0.713318
Msra	5.25166e-05	-0.388469	0.349	0.491	0.930489	0.710794
Atp2b1	2.5367e-11	-0.27057	0.383	0.539	4.49452e-07	0.710575
Ezh2	3.71611e-06	-0.282594	0.395	0.556	0.0658421	0.710432
Egfem1	1.97798e-11	-0.312025	0.349	0.492	3.50458e-07	0.709349
Tjp1	8.70226e-07	-0.326065	0.279	0.394	0.0154187	0.708122
Med12l	3.84808e-10	-0.294446	0.358	0.506	6.81803e-06	0.70751
Adamts6	1.03451e-06	-0.290638	0.366	0.518	0.0183295	0.706564
Lcorl	7.94173e-10	-0.252858	0.35	0.501	1.40712e-05	0.698603
Ntm	1.0136e-24	-0.776088	0.476	0.684	1.7959e-20	0.695906
Smoc1	2.27518e-05	-0.276016	0.313	0.451	0.403116	0.694013
Dlgap1	1.02185e-17	-0.503395	0.431	0.624	1.81051e-13	0.690705
Smchd1	5.09853e-07	-0.293076	0.369	0.537	0.00903357	0.687151
Rbms1	1.45506e-16	-0.43371	0.403	0.592	2.57807e-12	0.680743
Cdk19	6.69191e-07	-0.291062	0.341	0.503	0.0118567	0.677932
Arhgap31	1.26326e-09	-0.265124	0.227	0.335	2.23824e-05	0.677612
Ust	6.08844e-11	-0.386831	0.351	0.519	1.07875e-06	0.6763
Slc1a3	2.71967e-07	-0.263189	0.269	0.399	0.0048187	0.674185
Large1	4.5428e-10	-0.336785	0.386	0.575	8.04894e-06	0.671304
Zdhhc14	1.13092e-07	-0.273399	0.235	0.351	0.00200376	0.669515
Farp1	1.23738e-08	-0.264031	0.297	0.444	0.000219239	0.668919
Pde4b	3.6165e-12	-0.430202	0.366	0.548	6.40771e-08	0.667883
Hjurp	1.66433e-19	-0.437006	0.344	0.517	2.94886e-15	0.665377
Qk	3.72655e-20	-0.700012	0.425	0.641	6.60271e-16	0.663026
Cacnb4	1.71342e-07	-0.25464	0.168	0.255	0.00303585	0.658823
Rps6ka3	5.00656e-10	-0.350916	0.272	0.413	8.87063e-06	0.658595
Arpp21	9.45774e-10	-1.00338	0.283	0.431	1.67572e-05	0.656612
Mtss1	5.04099e-14	-0.604819	0.396	0.605	8.93163e-10	0.654545
Trpm3	6.19005e-07	-0.639608	0.149	0.228	0.0109675	0.653508
Dclk1	2.58167e-20	-0.569875	0.416	0.637	4.5742e-16	0.653061
Cadm2	1.53363e-22	-1.26349	0.368	0.564	2.71729e-18	0.652482
Greb1l	5.56986e-09	-0.261432	0.188	0.289	9.86867e-05	0.650519
Apbb2	2.02626e-07	-0.32287	0.206	0.317	0.00359013	0.649842
Thsd4	0.000199018	-0.287412	0.163	0.251	1	0.649402
Brd8	1.4205e-11	-0.321797	0.281	0.433	2.51685e-07	0.648961
Egfr	1.75482e-10	-0.446293	0.331	0.511	3.10919e-06	0.647749
Pola1	5.31514e-16	-0.474116	0.345	0.536	9.41736e-12	0.643657
Akap13	4.6223e-07	-0.35114	0.302	0.47	0.00818979	0.642553
Fgf14	1.69082e-08	-0.999504	0.223	0.348	0.00029958	0.640804
Cdk5rap2	1.73943e-19	-0.44784	0.326	0.51	3.08192e-15	0.639216
Ubash3b	1.27172e-06	-0.271519	0.214	0.335	0.0225324	0.638806
Ghr	7.05444e-07	-0.306481	0.19	0.298	0.0124991	0.637584
Gli2	1.1056e-18	-0.630335	0.397	0.624	1.95891e-14	0.636218
Syn3	1.77008e-05	-0.467318	0.186	0.295	0.313623	0.630508
Cacna1c	1.60263e-16	-0.846382	0.306	0.486	2.83954e-12	0.62963
Cbx5	5.5867e-22	-0.506323	0.36	0.572	9.89852e-18	0.629371
Etv6	3.07527e-10	-0.359799	0.263	0.418	5.44877e-06	0.629186
Rif1	1.30257e-11	-0.350309	0.293	0.467	2.30789e-07	0.627409
Hivep3	4.54888e-11	-0.708694	0.258	0.412	8.0597e-07	0.626213
Nap1l1	4.15124e-12	-0.2739	0.229	0.368	7.35518e-08	0.622282
Irs1	2.03842e-18	-0.571883	0.334	0.537	3.61167e-14	0.621974
Taf1d	1.85807e-08	-0.279615	0.238	0.383	0.000329212	0.62141
Npas3	5.02901e-18	-0.698139	0.305	0.491	8.9104e-14	0.621181
Asxl1	2.22874e-11	-0.363863	0.268	0.434	3.94888e-07	0.617511
Ppm1h	5.33436e-11	-0.59512	0.227	0.37	9.45141e-07	0.613513
Ptprk	8.90467e-13	-0.437502	0.352	0.574	1.57773e-08	0.61324
Mcph1	2.02041e-16	-0.336095	0.252	0.411	3.57977e-12	0.613139
Lrig3	5.27805e-15	-0.528181	0.316	0.516	9.35164e-11	0.612403
Smarca2	3.82522e-08	-0.288535	0.202	0.33	0.000677752	0.612121
Nasp	1.00794e-15	-0.433622	0.301	0.492	1.78587e-11	0.611788
Suz12	4.15656e-10	-0.25353	0.211	0.345	7.36459e-06	0.611594
Dtna	4.98201e-07	-0.280165	0.142	0.234	0.00882712	0.606837
Gria3	9.52937e-12	-0.346127	0.237	0.391	1.68841e-07	0.606138
Grk3	1.29072e-08	-0.254412	0.166	0.274	0.000228689	0.605839
Stt3b	2.92905e-10	-0.25633	0.218	0.361	5.1897e-06	0.603878
Smc6	2.18565e-11	-0.276374	0.228	0.378	3.87253e-07	0.603174
Tenm2	2.16708e-06	-0.334403	0.152	0.252	0.0383964	0.603174
Hip1	8.11525e-10	-0.31804	0.196	0.326	1.43786e-05	0.601227
Abhd2	0.00188987	-0.322049	0.144	0.24	1	0.6
Epb41l2	3.21502e-06	-0.443668	0.212	0.355	0.0569638	0.597183
Atp8a1	8.34716e-10	-0.365226	0.244	0.41	1.47895e-05	0.595122
Cenpc1	9.99071e-13	-0.293874	0.192	0.324	1.77015e-08	0.592592
Cdyl	7.08094e-09	-0.282591	0.201	0.34	0.00012546	0.591176
Ptch2	3.84956e-18	-0.545703	0.284	0.481	6.82065e-14	0.590436
Spata13	2.4434e-14	-0.299884	0.224	0.38	4.32921e-10	0.589474
Antxr2	2.2403e-12	-0.310561	0.214	0.364	3.96937e-08	0.587912
Ahctf1	3.59432e-10	-0.307176	0.204	0.347	6.36842e-06	0.587896
Cacna1a	2.9229e-12	-0.670385	0.191	0.325	5.1788e-08	0.587692
Lpin2	1.3673e-11	-0.370331	0.223	0.381	2.42258e-07	0.585302
Fry	8.19836e-26	-0.781801	0.372	0.636	1.45258e-21	0.584906
Slc8a1	6.87574e-10	-0.387761	0.186	0.318	1.21824e-05	0.584905
Diaph2	6.88165e-15	-0.489806	0.27	0.464	1.21929e-10	0.581896
Ntrk2	4.83401e-08	-0.368334	0.137	0.236	0.00085649	0.580508
Dnmt1	3.51081e-10	-0.300201	0.188	0.324	6.22045e-06	0.580247
Mad1l1	4.87155e-10	-0.266759	0.188	0.324	8.63141e-06	0.580247
Cbfb	7.00766e-08	-0.304876	0.191	0.332	0.00124162	0.575301
Cdh13	1.42543e-11	-0.48927	0.237	0.413	2.52558e-07	0.57385
Ptprm	7.07925e-09	-0.579919	0.14	0.244	0.00012543	0.57377
Nhsl1	6.76985e-09	-0.398922	0.218	0.38	0.000119948	0.573684
Pard3b	4.49339e-28	-0.750673	0.335	0.584	7.96138e-24	0.57363
Rai14	6.99058e-07	-0.371893	0.201	0.351	0.0123859	0.572649
Cmtm4	2.78086e-09	-0.283426	0.178	0.311	4.92713e-05	0.572347
Ctnnb1	9.28823e-12	-0.251824	0.168	0.294	1.64569e-07	0.571428
Vcl	3.22993e-07	-0.288002	0.144	0.252	0.00572279	0.571428
Zfp385b	6.6142e-23	-0.733639	0.305	0.535	1.1719e-18	0.570093
Lrch1	1.46766e-11	-0.340016	0.2	0.351	2.60041e-07	0.5698
Frmd4b	3.02231e-72	-1.2425	0.442	0.776	5.35492e-68	0.569588
Nop58	4.22877e-10	-0.296853	0.181	0.318	7.49254e-06	0.569182
Sh3d19	1.79169e-06	-0.298215	0.128	0.226	0.0317451	0.566371
Rbms3	2.92184e-19	-0.56938	0.228	0.403	5.17691e-15	0.565757
Ezr	3.18251e-11	-0.259547	0.143	0.253	5.63877e-07	0.565217
Cntln	6.98409e-13	-0.406421	0.214	0.379	1.23744e-08	0.564644
Ddr2	7.08034e-14	-0.343379	0.181	0.321	1.25449e-09	0.563863
Ncapd3	1.03472e-13	-0.362328	0.199	0.353	1.83331e-09	0.563739
Mpdz	2.13431e-17	-0.384791	0.227	0.403	3.78156e-13	0.563275
Rnf144a	1.22986e-14	-0.308217	0.185	0.329	2.17906e-10	0.56231
Pitpnm2	5.86899e-06	-0.298736	0.181	0.323	0.103987	0.560371
Paxip1	8.73597e-12	-0.251882	0.136	0.243	1.54784e-07	0.559671
Jun	4.78136e-12	-0.408412	0.189	0.338	8.47161e-08	0.559171
Sez6l	2.10288e-11	-0.262574	0.152	0.272	3.72589e-07	0.558823
Spred1	7.21476e-10	-0.308781	0.175	0.314	1.27831e-05	0.557325
Klf13	9.76586e-08	-0.269711	0.154	0.277	0.00173032	0.555956
Nup210	5.58573e-09	-0.285279	0.164	0.295	9.8968e-05	0.555932
Ckap5	2.48823e-20	-0.64047	0.255	0.461	4.40865e-16	0.553145
Epn2	1.64273e-06	-0.254614	0.105	0.19	0.0291059	0.552631
Arhgap10	3.90784e-09	-0.308328	0.165	0.299	6.92391e-05	0.551839
Ppp1r14c	7.04192e-21	-0.575751	0.222	0.404	1.24769e-16	0.549505
Tgfb2	1.07691e-11	-0.424836	0.192	0.35	1.90808e-07	0.548571
Spop	4.03376e-08	-0.273589	0.159	0.29	0.000714702	0.548276
Cntrl	1.49082e-14	-0.413959	0.18	0.329	2.64143e-10	0.547112
Rgs20	1.83037e-13	-0.521041	0.229	0.419	3.24305e-09	0.546539
Elmsan1	1.69565e-11	-0.317474	0.148	0.271	3.00436e-07	0.546125
Prim2	2.90366e-09	-0.381393	0.182	0.335	5.1447e-05	0.543283
Slc12a2	1.04633e-11	-0.290209	0.139	0.256	1.85389e-07	0.542969
Sgms1	1.23905e-11	-0.478666	0.147	0.271	2.19535e-07	0.542435
Serinc5	1.44183e-14	-0.372756	0.181	0.334	2.55463e-10	0.541916
Ankrd44	4.3398e-19	-0.51423	0.248	0.458	7.68925e-15	0.541485
Prkca	4.18176e-10	-0.316888	0.119	0.22	7.40924e-06	0.540909
Vgll4	1.25486e-10	-0.293195	0.153	0.283	2.22335e-06	0.540636
Nucks1	3.16467e-16	-0.432962	0.205	0.38	5.60716e-12	0.539474
Plxdc2	7.93043e-08	-0.48482	0.1	0.186	0.00140511	0.537634
Adamtsl3	0.000183421	-0.429743	0.109	0.203	1	0.536946
Tenm1	4.57819e-10	-0.48353	0.125	0.233	8.11164e-06	0.53648
Pvt1	3.21579e-11	-0.474926	0.193	0.361	5.69774e-07	0.534626
G2e3	1.12028e-12	-0.492436	0.196	0.367	1.98491e-08	0.53406
Mical3	2.78155e-10	-0.362473	0.165	0.309	4.92834e-06	0.53398
Sorbs2	3.30893e-08	-0.458662	0.107	0.201	0.000586277	0.532338
Itsn2	1.19724e-09	-0.266366	0.124	0.233	2.12126e-05	0.532189
Elmo1	6.58138e-22	-0.855654	0.237	0.446	1.16609e-17	0.53139
Il1rapl1	2.45518e-30	-0.788868	0.263	0.496	4.3501e-26	0.530242
Epb41l3	6.27388e-08	-0.250018	0.1	0.189	0.00111161	0.5291
Lig1	1.05485e-12	-0.275275	0.121	0.229	1.86899e-08	0.528384
Lamc1	5.33212e-10	-0.415985	0.123	0.234	9.44745e-06	0.525641
Spidr	9.168e-12	-0.263842	0.11	0.21	1.62439e-07	0.523809
Slc24a3	3.12045e-05	-0.429055	0.124	0.237	0.552881	0.523207
Atad5	4.76759e-09	-0.38144	0.167	0.32	8.44722e-05	0.521875
Ano6	2.15213e-09	-0.386754	0.173	0.332	3.81315e-05	0.521084
Fam13c	2.97029e-07	-0.260257	0.103	0.198	0.00526276	0.520202
Lmnb1	2.49487e-18	-0.490022	0.209	0.402	4.42041e-14	0.5199
Pde7b	9.42079e-10	-0.292566	0.094	0.181	1.66918e-05	0.519337
Chsy1	1.45235e-06	-0.303219	0.138	0.266	0.0257327	0.518797
Sae1	1.04467e-13	-0.338499	0.152	0.293	1.85094e-09	0.518771
Rrbp1	0.00849728	-0.276459	0.106	0.205	1	0.517073
Odf2	1.85372e-11	-0.313984	0.14	0.271	3.28442e-07	0.516605
Nr3c2	3.10623e-14	-0.61172	0.204	0.395	5.50362e-10	0.516456
Rftn2	9.16627e-11	-0.389776	0.157	0.304	1.62408e-06	0.516447
Airn	8.95511e-24	-0.489157	0.193	0.374	1.58667e-19	0.516043
Clic4	2.90917e-12	-0.330168	0.141	0.274	5.15446e-08	0.514598
Grin3a	9.50583e-14	-0.346494	0.127	0.247	1.68424e-09	0.51417
Gab1	2.79252e-24	-0.618816	0.228	0.444	4.94779e-20	0.513513
Dlg2	6.0962e-16	-0.715221	0.179	0.351	1.08012e-11	0.509971
Dock10	1.50124e-15	-0.532187	0.144	0.283	2.6599e-11	0.508834
Smc4	4.75085e-30	-0.778739	0.226	0.445	8.41755e-26	0.507865
Mob3b	7.90273e-15	-0.326797	0.13	0.256	1.40021e-10	0.507812
Tshz1	3.1261e-06	-0.272508	0.109	0.215	0.0553882	0.506977
Gab2	1.84628e-10	-0.391028	0.12	0.237	3.27124e-06	0.506329
Itpr2	1.23729e-07	-0.42692	0.089	0.176	0.00219222	0.505682
St6galnac3	1.03726e-11	-0.588271	0.165	0.328	1.83781e-07	0.503049
Tmpo	1.3095e-21	-0.631152	0.224	0.446	2.32018e-17	0.502242
Mtbp	7.7815e-09	-0.273202	0.112	0.223	0.000137873	0.502242
Rad21	2.8464e-22	-0.526982	0.196	0.391	5.04325e-18	0.501279
Ndst3	2.76036e-11	-0.700915	0.133	0.266	4.89081e-07	0.5
Blm	1.61599e-10	-0.351229	0.133	0.266	2.86321e-06	0.5
Cadps2	6.27069e-23	-1.21595	0.241	0.484	1.11104e-18	0.497934
Vsx2	7.30624e-09	-0.262918	0.078	0.157	0.000129452	0.496815
Prkce	2.32111e-22	-0.781615	0.245	0.494	4.11254e-18	0.495951
Nxn	2.11524e-12	-0.446738	0.15	0.303	3.74778e-08	0.495049
Dek	1.09575e-18	-0.48843	0.185	0.374	1.94145e-14	0.494652
Galnt2	2.47333e-17	-0.456563	0.162	0.328	4.38225e-13	0.493902
Tbc1d1	4.20012e-07	-0.287991	0.104	0.211	0.00744177	0.492891
Oxr1	3.19632e-11	-0.431425	0.131	0.266	5.66324e-07	0.492481
Lbr	5.18864e-13	-0.306562	0.126	0.256	9.19323e-09	0.492187
Mthfd1l	8.41602e-13	-0.430593	0.153	0.311	1.49115e-08	0.491961
Epha3	4.64548e-09	-0.319507	0.098	0.2	8.23086e-05	0.49
Dpyd	2.36083e-13	-0.321506	0.097	0.198	4.18292e-09	0.489899
Cep128	2.56063e-19	-0.603905	0.196	0.401	4.53693e-15	0.488778
Nxph1	2.7383e-08	-0.514381	0.092	0.189	0.000485172	0.486772
Nectin3	6.18211e-14	-0.415248	0.143	0.294	1.09535e-09	0.486394
Stxbp6	1.98184e-18	-0.585085	0.197	0.406	3.51143e-14	0.485222
Prdm5	3.05265e-05	-0.260528	0.08	0.165	0.540869	0.484848
Utrn	4.33444e-21	-0.703482	0.178	0.368	7.67976e-17	0.483696
Dtl	5.72e-14	-0.404671	0.131	0.271	1.01347e-09	0.483395
Gpc6	3.00112e-50	-1.27348	0.301	0.623	5.31739e-46	0.483146
Fstl1	0.000191629	-0.270549	0.084	0.174	1	0.482758
Ccdc34	3.14322e-11	-0.279333	0.105	0.218	5.56916e-07	0.481651
Syt13	1.80735e-10	-0.255758	0.091	0.189	3.20226e-06	0.481481
Topbp1	1.55632e-13	-0.351173	0.127	0.264	2.75749e-09	0.48106
Anp32e	2.35022e-12	-0.326971	0.121	0.252	4.16411e-08	0.480159
Dgkb	5.42752e-13	-0.51094	0.122	0.255	9.61648e-09	0.478431
Ptprj	8.8476e-13	-0.535299	0.118	0.247	1.56762e-08	0.477733
Kcnab1	3.32e-06	-0.259966	0.075	0.157	0.0588237	0.477707
Brca2	6.3945e-10	-0.346864	0.117	0.245	1.13298e-05	0.477551
Prdm11	1.82778e-08	-0.276915	0.094	0.197	0.000323846	0.477157
Nr3c1	1.66868e-14	-0.386123	0.135	0.283	2.95657e-10	0.477032
Tbata	1.72565e-12	-0.309711	0.099	0.208	3.05751e-08	0.475961
Pcdh9	1.78213e-39	-1.55827	0.245	0.515	3.15758e-35	0.475728
Car10	5.44027e-09	-1.03228	0.104	0.219	9.63908e-05	0.474886
Mms22l	4.8325e-15	-0.448411	0.149	0.314	8.56222e-11	0.474522
Sipa1l1	6.51704e-07	-0.303948	0.09	0.19	0.0115469	0.473684
Angptl2	6.61901e-11	-0.28462	0.089	0.189	1.17276e-06	0.470899
Hells	4.89563e-07	-0.370379	0.112	0.239	0.00867408	0.468619
Vrk1	2.1848e-07	-0.259155	0.089	0.19	0.00387103	0.468421
Fndc3b	4.29356e-12	-0.366092	0.108	0.231	7.60733e-08	0.467532
Abr	1.58387e-10	-0.412365	0.12	0.257	2.8063e-06	0.466926
Epb41l1	1.32342e-13	-0.643354	0.132	0.283	2.34483e-09	0.466431
Cep152	7.86972e-12	-0.311053	0.104	0.223	1.39436e-07	0.466368
Cerk	1.61406e-15	-0.372223	0.124	0.266	2.85979e-11	0.466165
Sema3e	9.30503e-11	-0.421109	0.116	0.249	1.64867e-06	0.465863
Rasa3	3.57965e-10	-0.328069	0.092	0.199	6.34243e-06	0.462311
Cep192	5.12943e-19	-0.472078	0.149	0.323	9.08832e-15	0.4613
Fgfr1	3.50108e-06	-0.299008	0.089	0.193	0.0620321	0.46114
Ephb1	1.87589e-14	-0.891682	0.128	0.278	3.3237e-10	0.460431
Fxyd6	5.7573e-06	-0.296253	0.098	0.213	0.102008	0.460094
Eml1	2.34851e-14	-0.366091	0.115	0.25	4.16109e-10	0.46
Wdhd1	2.17847e-14	-0.257251	0.08	0.174	3.85981e-10	0.45977
Itpr1	6.07292e-19	-0.548026	0.146	0.318	1.076e-14	0.459119
Abtb2	1.03122e-11	-0.521701	0.129	0.281	1.82712e-07	0.459075
Cklf	7.62742e-11	-0.265508	0.089	0.194	1.35143e-06	0.458763
Tnfaip8	5.52528e-13	-0.493573	0.134	0.294	9.78969e-09	0.455782
Kctd8	4.04659e-14	-0.631943	0.128	0.281	7.16975e-10	0.455516
Anp32b	5.68898e-13	-0.354488	0.112	0.246	1.00797e-08	0.455284
Slc7a1	2.53827e-21	-0.565592	0.122	0.268	4.4973e-17	0.455224
Galnt18	5.48926e-13	-0.374578	0.076	0.167	9.72586e-09	0.45509
Ptn	1.95439e-24	-0.738324	0.157	0.346	3.4628e-20	0.453757
Ncapd2	2.99217e-18	-0.537735	0.151	0.334	5.30152e-14	0.452096
Whrn	1.70191e-21	-0.629947	0.15	0.332	3.01544e-17	0.451807
Rfwd3	9.04531e-10	-0.255588	0.075	0.166	1.60265e-05	0.451807
Pcdh7	3.38241e-26	-0.839719	0.182	0.403	5.99295e-22	0.451613
Rad18	2.22276e-13	-0.357637	0.105	0.234	3.93828e-09	0.448718
Cdh8	1.4722e-16	-0.676978	0.157	0.35	2.60844e-12	0.448571
Pde10a	9.8063e-18	-0.652995	0.149	0.333	1.73748e-13	0.447447
Nkd1	2.95081e-23	-0.70887	0.191	0.427	5.22824e-19	0.447307
Stard13	5.15154e-12	-0.516642	0.072	0.161	9.1275e-08	0.447205
Zgrf1	1.5524e-10	-0.400203	0.115	0.258	2.75054e-06	0.445736
Chst11	2.73838e-11	-0.420474	0.081	0.182	4.85186e-07	0.445055
Zranb3	1.52372e-14	-0.323627	0.086	0.194	2.69973e-10	0.443299
Samd4	2.67357e-16	-0.425379	0.093	0.21	4.73703e-12	0.442857
Tenm3	3.26773e-24	-0.728521	0.164	0.372	5.78976e-20	0.44086
Kitl	4.22973e-09	-0.423036	0.096	0.219	7.49424e-05	0.438356
Pqlc1	7.31232e-13	-0.430807	0.112	0.256	1.2956e-08	0.4375
Mef2c	1.3238e-10	-0.382912	0.082	0.19	2.34551e-06	0.431579
Prkd1	4.61661e-21	-0.752137	0.156	0.362	8.17971e-17	0.430939
Sgcd	1.94062e-44	-1.22706	0.195	0.455	3.43839e-40	0.428571
Cplx2	2.62485e-13	-0.541057	0.136	0.318	4.65071e-09	0.427673
Cep112	2.60766e-16	-0.461768	0.111	0.261	4.62025e-12	0.425287
Kcnq5	3.44014e-44	-1.5281	0.235	0.557	6.09523e-40	0.421903
Ska2	9.39881e-16	-0.306629	0.077	0.183	1.66528e-11	0.420765
Myh9	1.09291e-05	-0.403081	0.069	0.164	0.193641	0.420731
Arid5b	1.46901e-14	-0.399928	0.076	0.181	2.6028e-10	0.419889
Nhs	5.55074e-25	-0.773306	0.164	0.392	9.83481e-21	0.418367
Bcl2	8.876e-17	-0.415176	0.092	0.22	1.57265e-12	0.418182
Pkp4	2.79478e-47	-0.928919	0.2	0.479	4.95179e-43	0.417536
Flnb	2.97819e-08	-0.396698	0.093	0.223	0.000527676	0.41704
Gpr153	8.10481e-17	-0.478856	0.111	0.267	1.43601e-12	0.41573
Myo10	1.86371e-27	-0.795969	0.166	0.4	3.30213e-23	0.415
Hs6st3	7.60046e-40	-1.24899	0.209	0.505	1.34665e-35	0.413861
Hcn1	3.57093e-12	-0.443158	0.069	0.167	6.32697e-08	0.413173
Kcnq3	1.02522e-35	-0.863153	0.177	0.429	1.81649e-31	0.412587
Mdc1	1.05619e-13	-0.331293	0.083	0.202	1.87136e-09	0.410891
Ccnd1	8.97436e-38	-0.714157	0.163	0.397	1.59008e-33	0.410579
Prex1	7.07756e-19	-0.468015	0.093	0.227	1.254e-14	0.409691
Disc1	1.5784e-09	-0.329619	0.07	0.171	2.79661e-05	0.409356
Hk2	3.87703e-12	-0.362515	0.079	0.193	6.86932e-08	0.409326
Arl6ip1	7.33035e-22	-0.509252	0.097	0.237	1.29879e-17	0.409283
Rbl1	6.76685e-14	-0.34162	0.081	0.198	1.19895e-09	0.409091
Rad51b	1.76382e-31	-0.904177	0.168	0.411	3.12514e-27	0.408759
Adamts1	4.80023e-12	-0.376903	0.072	0.177	8.50504e-08	0.406779
Mki67	3.69304e-64	-1.68329	0.221	0.544	6.54332e-60	0.40625
Akna	5.92992e-11	-0.315942	0.062	0.153	1.05066e-06	0.405228
Acot7	3.98084e-09	-0.295861	0.062	0.153	7.05325e-05	0.405228
Slc44a5	1.4828e-15	-0.324561	0.064	0.158	2.62723e-11	0.405063
Ldlrad3	1.04732e-17	-0.342137	0.068	0.168	1.85565e-13	0.404762
Mctp1	4.09099e-11	-0.527289	0.078	0.194	7.24842e-07	0.402062
Pole	2.07815e-13	-0.386916	0.084	0.209	3.68207e-09	0.401914
Rangap1	7.70926e-15	-0.379902	0.083	0.208	1.36593e-10	0.399038
Wwc1	6.0461e-13	-0.443342	0.081	0.204	1.07125e-08	0.397059
Kcnma1	4.85455e-24	-1.01353	0.152	0.383	8.6013e-20	0.396867
Fam19a5	8.65672e-25	-0.791671	0.155	0.391	1.5338e-20	0.396419
Sel1l3	5.85053e-12	-0.359179	0.065	0.164	1.0366e-07	0.396341
Ror1	2.44643e-26	-0.900015	0.166	0.419	4.33459e-22	0.396181
Ror2	2.20313e-22	-0.603968	0.119	0.301	3.9035e-18	0.395349
Rrm1	2.20784e-19	-0.36979	0.079	0.2	3.91185e-15	0.395
Pcx	2.27607e-14	-0.465862	0.09	0.229	4.03273e-10	0.393013
Rapgef4	2.06633e-15	-0.534851	0.074	0.189	3.66112e-11	0.391534
Wipf1	6.08845e-11	-0.361246	0.062	0.159	1.07875e-06	0.389937
Tmtc1	4.68471e-26	-0.70529	0.129	0.331	8.30037e-22	0.389728
Cacna1e	2.48914e-20	-1.28623	0.127	0.327	4.41026e-16	0.388379
Cntn1	1.0372e-11	-0.720223	0.079	0.204	1.83772e-07	0.387255
Dusp10	1.24378e-14	-0.344505	0.06	0.155	2.20374e-10	0.387097
Prkcq	1.29507e-09	-0.301117	0.06	0.155	2.29461e-05	0.387097
Hpca	1.08849e-20	-0.478094	0.089	0.23	1.92859e-16	0.386956
Ctdspl	5.98719e-15	-0.44451	0.079	0.205	1.06081e-10	0.385366
Tanc1	9.85874e-12	-0.392462	0.065	0.169	1.74677e-07	0.384615
Kcnk1	8.63187e-09	-0.339879	0.06	0.156	0.00015294	0.384615
Smc2	4.0491e-43	-1.08636	0.183	0.478	7.17419e-39	0.382845
Csmd2	1.25873e-18	-0.723801	0.097	0.254	2.23022e-14	0.38189
Unc5c	8.17778e-25	-1.34645	0.111	0.292	1.44894e-20	0.380137
Atad2	7.4301e-29	-0.69039	0.126	0.332	1.31647e-24	0.379518
Gli1	6.78842e-23	-0.568946	0.108	0.285	1.20277e-18	0.378947
Kcnd2	1.78754e-23	-1.59507	0.106	0.28	3.16717e-19	0.378571
Dock9	2.38754e-11	-0.61659	0.063	0.167	4.23025e-07	0.377245
Grb10	6.58702e-11	-0.522325	0.086	0.228	1.16709e-06	0.377193
Racgap1	2.00592e-24	-0.474102	0.087	0.233	3.55409e-20	0.37339
Sh3rf1	3.41213e-10	-0.390693	0.056	0.151	6.04561e-06	0.370861
Slco3a1	2.37488e-16	-0.406713	0.063	0.171	4.20781e-12	0.368421
Lrrc4c	1.30826e-14	-1.33542	0.079	0.216	2.31798e-10	0.365741
Ndc1	9.72811e-12	-0.293554	0.057	0.156	1.72363e-07	0.365384
Kif24	5.92566e-17	-0.419249	0.073	0.201	1.04991e-12	0.363184
Lama2	3.32489e-25	-0.833302	0.098	0.272	5.89103e-21	0.360294
Rhoq	8.00524e-16	-0.346843	0.055	0.154	1.41837e-11	0.357143
Syne1	2.09294e-21	-1.05948	0.103	0.29	3.70827e-17	0.355172
Ncapg2	3.64108e-16	-0.522336	0.082	0.231	6.45127e-12	0.354978
Mdga2	1.29346e-36	-1.15792	0.134	0.378	2.29175e-32	0.354497
Myo1e	3.6847e-15	-0.544313	0.081	0.229	6.52855e-11	0.353712
Adcy2	1.57011e-15	-0.555538	0.068	0.194	2.78192e-11	0.350515
Fbxl7	4.80726e-22	-0.614032	0.066	0.189	8.5175e-18	0.349206
Srgap1	1.62444e-14	-0.567177	0.075	0.215	2.87817e-10	0.348837
Thsd7b	1.23095e-18	-0.586717	0.053	0.153	2.181e-14	0.346405
Adamts14	4.62965e-26	-0.706516	0.099	0.286	8.20282e-22	0.346154
Ncam2	2.92798e-22	-0.897113	0.074	0.214	5.18779e-18	0.345794
Epb41l4b	2.1636e-14	-0.524879	0.075	0.217	3.83347e-10	0.345622
Asic2	3.91424e-17	-1.07269	0.058	0.168	6.93526e-13	0.345238
Egr1	3.71674e-17	-0.619206	0.082	0.24	6.58532e-13	0.341667
Cnksr3	2.93605e-12	-0.471563	0.062	0.182	5.20209e-08	0.340659
Fat3	9.6641e-47	-1.1119	0.146	0.432	1.71228e-42	0.337963
Sorcs2	1.53071e-32	-0.849285	0.108	0.32	2.71212e-28	0.3375
Vat1l	1.63727e-15	-0.531627	0.063	0.187	2.90092e-11	0.336898
Cntnap4	4.99262e-16	-0.691242	0.075	0.223	8.84593e-12	0.336323
Grik1	9.34518e-17	-0.495575	0.051	0.152	1.65578e-12	0.335526
Brca1	6.41629e-20	-0.538019	0.074	0.222	1.13684e-15	0.333333
Ryr2	2.44739e-12	-0.866514	0.063	0.189	4.33628e-08	0.333333
Lrp1b	2.32051e-17	-1.41955	0.075	0.226	4.11147e-13	0.331858
Camk4	7.72485e-18	-0.616092	0.055	0.167	1.36869e-13	0.329341
Polq	1.75009e-23	-0.561957	0.079	0.242	3.1008e-19	0.326446
Prkg1	1.58905e-14	-0.976782	0.06	0.184	2.81548e-10	0.326087
Clspn	2.04274e-17	-0.469586	0.064	0.198	3.61933e-13	0.323232
Gm48530	5.83656e-22	-0.421654	0.053	0.164	1.03412e-17	0.323171
Rad54b	3.41941e-17	-0.425163	0.058	0.182	6.05851e-13	0.318681
Cenpp	4.114e-42	-1.02974	0.123	0.386	7.28918e-38	0.318653
Tbc1d31	4.91207e-14	-0.370446	0.05	0.157	8.70321e-10	0.318471
Kntc1	4.92248e-21	-0.509849	0.069	0.217	8.72165e-17	0.317972
Fat1	1.93315e-22	-0.672075	0.09	0.284	3.42516e-18	0.316901
Ccdc18	3.38236e-18	-0.453442	0.058	0.184	5.99287e-14	0.315217
Iqgap2	4.94154e-14	-0.458125	0.058	0.184	8.75542e-10	0.315217
Fosb	4.06663e-38	-1.03773	0.103	0.327	7.20526e-34	0.314985
Bard1	1.54954e-20	-0.387981	0.051	0.162	2.74547e-16	0.314815
Angpt1	7.45574e-18	-0.526934	0.051	0.162	1.32101e-13	0.314815
Pdlim3	1.10717e-47	-1.21481	0.124	0.394	1.96168e-43	0.314721
Syt9	3.9497e-17	-0.460438	0.051	0.163	6.99808e-13	0.312883
Brip1	1.11849e-17	-0.478563	0.058	0.186	1.98174e-13	0.311828
Adamts20	1.47278e-32	-0.705497	0.084	0.27	2.60947e-28	0.311111
Arhgap26	2.58956e-20	-0.682477	0.065	0.209	4.58817e-16	0.311005
Diaph3	5.73206e-56	-1.36378	0.142	0.458	1.01561e-51	0.310044
Luzp2	7.92586e-21	-1.01936	0.078	0.254	1.4043e-16	0.307086
Sept8	8.85488e-15	-0.441154	0.054	0.176	1.56891e-10	0.306818
Rgma	4.26447e-29	-0.692786	0.081	0.266	7.55579e-25	0.304511
Gli3	4.57248e-19	-0.587778	0.058	0.193	8.10151e-15	0.300518
Sash1	6.35085e-19	-0.57879	0.059	0.198	1.12524e-14	0.29798
Fos	1.88999e-15	-0.533721	0.049	0.166	3.34868e-11	0.295181
Grm1	1.03635e-11	-0.819704	0.046	0.156	1.83621e-07	0.294872
Hmgb2	1.60035e-16	-0.403891	0.049	0.167	2.8355e-12	0.293413
Kirrel3	5.03557e-20	-1.38876	0.05	0.171	8.92202e-16	0.292397
Notch2	2.79024e-22	-0.573137	0.066	0.226	4.94375e-18	0.292035
Kcnd3	1.32436e-20	-0.592761	0.045	0.155	2.34649e-16	0.290322
Cacnb2	3.41936e-23	-0.668111	0.059	0.204	6.05842e-19	0.289216
Pclaf	1.24905e-17	-0.444327	0.046	0.163	2.21306e-13	0.282208
Col4a2	1.31545e-16	-0.943851	0.06	0.215	2.33071e-12	0.27907
Mamdc2	9.40369e-15	-0.613026	0.058	0.208	1.66615e-10	0.278846
Mast4	4.26949e-16	-0.737919	0.044	0.158	7.56469e-12	0.278481
E2f7	4.52405e-25	-0.558587	0.058	0.209	8.01571e-21	0.277512
Plk4	6.73557e-16	-0.383544	0.043	0.155	1.19341e-11	0.277419
Tanc2	2.16145e-16	-0.598166	0.042	0.153	3.82966e-12	0.27451
Zmat4	1.03519e-14	-0.784256	0.046	0.17	1.83414e-10	0.270588
Palld	2.31687e-16	-0.528541	0.044	0.163	4.10503e-12	0.269938
Ticrr	1.45152e-16	-0.395293	0.04	0.15	2.5718e-12	0.266666
Cenpf	3.11168e-41	-1.13944	0.085	0.319	5.51327e-37	0.266458
Bora	5.88419e-16	-0.508233	0.047	0.177	1.04256e-11	0.265537
Lama5	8.4044e-28	-0.796537	0.065	0.245	1.48909e-23	0.265306
Efcab11	9.82202e-24	-0.790738	0.068	0.258	1.74027e-19	0.263566
Lrp8	6.60984e-18	-0.654229	0.046	0.175	1.17113e-13	0.262857
Top2a	1.74054e-59	-1.56024	0.114	0.435	3.08389e-55	0.262069
Kif20b	2.61692e-33	-0.931543	0.076	0.293	4.63666e-29	0.259386
Slc4a4	8.8428e-19	-0.929527	0.043	0.166	1.56677e-14	0.259036
Creb5	5.35775e-18	-0.674236	0.046	0.178	9.49286e-14	0.258427
Cit	9.71313e-38	-0.924071	0.08	0.31	1.72097e-33	0.258064
Hist1h1e	2.35303e-12	-0.452897	0.041	0.159	4.1691e-08	0.257861
Cenpe	1.50567e-48	-1.20066	0.087	0.338	2.66775e-44	0.257396
Lockd	3.31771e-23	-0.554285	0.05	0.195	5.87832e-19	0.25641
Smad3	8.63379e-38	-0.830998	0.071	0.281	1.52974e-33	0.252669
Bcar3	3.57138e-20	-0.608493	0.049	0.194	6.32776e-16	0.252577
Col4a1	5.90083e-21	-0.994769	0.053	0.211	1.04551e-16	0.251185
Itga9	5.59789e-17	-0.632723	0.042	0.168	9.91835e-13	0.25
Tcf7l2	3.67035e-32	-0.768239	0.059	0.239	6.50312e-28	0.246862
Add3	2.65811e-16	-0.502296	0.038	0.155	4.70964e-12	0.245161
Bmpr1b	5.14383e-21	-0.544961	0.04	0.164	9.11384e-17	0.243902
Hhip	7.17642e-37	-1.08634	0.075	0.313	1.27152e-32	0.239617
Stil	2.2435e-15	-0.435125	0.037	0.155	3.97503e-11	0.23871
Kank1	8.04773e-26	-0.738503	0.047	0.205	1.4259e-21	0.229268
Kif15	2.13017e-48	-1.20015	0.082	0.359	3.77423e-44	0.228412
Tacc3	5.83653e-24	-0.543892	0.039	0.178	1.03412e-19	0.219101
Csgalnact1	1.30951e-24	-0.634549	0.034	0.16	2.32019e-20	0.2125
Adamts12	4.57823e-21	-0.701181	0.037	0.177	8.11171e-17	0.209039
Incenp	2.72876e-41	-0.794191	0.052	0.25	4.83482e-37	0.208
Lrrtm3	2.12587e-26	-0.902639	0.038	0.183	3.76661e-22	0.20765
Aspm	4.66399e-54	-1.31334	0.064	0.309	8.26366e-50	0.20712
Knl1	5.13129e-54	-1.2033	0.07	0.342	9.09162e-50	0.204678
Arhgap11a	1.90825e-29	-0.527895	0.034	0.167	3.38104e-25	0.203593
Acer3	1.50392e-31	-0.647025	0.039	0.193	2.66465e-27	0.202072
Ckap2	3.55678e-23	-0.550084	0.034	0.17	6.30191e-19	0.2
Kif11	4.61162e-52	-1.23465	0.067	0.337	8.17086e-48	0.198813
Kif18a	1.24054e-28	-0.720626	0.043	0.218	2.198e-24	0.197248
Rtkn2	8.10329e-20	-0.495552	0.029	0.151	1.43574e-15	0.192053
Ttk	1.26626e-22	-0.554052	0.032	0.171	2.24355e-18	0.187134
Anln	5.65823e-41	-0.791466	0.043	0.232	1.00253e-36	0.185345
Plxna2	2.31096e-57	-1.35889	0.062	0.34	4.09455e-53	0.182353
Sgo2a	4.07653e-25	-0.5042	0.026	0.15	7.22279e-21	0.173333
Ect2	1.50205e-47	-0.8583	0.041	0.237	2.66134e-43	0.172996
Tpx2	2.44386e-44	-0.934462	0.044	0.255	4.33002e-40	0.172549
Bub1b	4.97099e-24	-0.570367	0.029	0.17	8.8076e-20	0.170588
Mis18bp1	1.22189e-35	-0.803781	0.037	0.219	2.16495e-31	0.16895
Nusap1	8.55879e-22	-0.595555	0.029	0.172	1.51645e-17	0.168605
Neil3	1.32119e-34	-0.856189	0.04	0.239	2.34089e-30	0.167364
Kif4	7.54906e-40	-0.930082	0.043	0.258	1.33754e-35	0.166667
Prc1	2.4131e-29	-0.744398	0.033	0.202	4.27553e-25	0.163366
Ckap2l	2.77302e-24	-0.577142	0.028	0.172	4.91324e-20	0.162791
Bub1	1.33179e-26	-0.64546	0.03	0.187	2.35966e-22	0.160428
Kif18b	5.25766e-24	-0.524082	0.024	0.154	9.31551e-20	0.155844
Spag5	5.61357e-28	-0.543353	0.024	0.158	9.94612e-24	0.151899
Ndc80	1.0401e-23	-0.55326	0.024	0.158	1.84285e-19	0.151899
Ncapg	1.22607e-35	-0.694244	0.03	0.199	2.17236e-31	0.150754
Kif23	1.01369e-33	-0.820713	0.032	0.216	1.79605e-29	0.148148
Cdca2	5.97423e-44	-0.939973	0.033	0.242	1.05851e-39	0.136364
Ccnf	2.89548e-27	-0.571982	0.021	0.157	5.13022e-23	0.133758
Kif14	5.66692e-32	-0.666064	0.022	0.174	1.00406e-27	0.126437
Depdc1b	6.89666e-29	-0.600829	0.018	0.159	1.22195e-24	0.113207
Hmmr	3.57293e-29	-0.623315	0.017	0.158	6.33051e-25	0.107595

## Sheet: cluster 3
gene	p_val	avg_log2FC	fraction + in cluster	fraction + not in cluster	p_val_adj	ratio + in:out of cluster
Thsd7b	1.37779e-28	1.39959	0.298	0.12	2.44117e-24	2.48333
Sned1	1.74199e-09	0.802083	0.163	0.079	3.08645e-05	2.06329
Asic2	1.57386e-20	1.78598	0.281	0.139	2.78857e-16	2.02158
Greb1l	5.39889e-42	1.25554	0.486	0.25	9.56576e-38	1.944
Angpt1	1.6812e-15	0.8708	0.259	0.134	2.97874e-11	1.93283
Lama2	6.49263e-31	1.11801	0.435	0.227	1.15036e-26	1.9163
Ttc23	2.13021e-13	0.585064	0.189	0.104	3.7743e-09	1.81731
Etv5	1.93937e-06	0.636468	0.156	0.088	0.0343617	1.77273
Pdlim3	7.89403e-49	1.35474	0.581	0.333	1.39866e-44	1.74474
Antxr1	2.34578e-07	0.572952	0.169	0.097	0.00415625	1.74227
Adamts19	3.72558e-09	0.604958	0.162	0.097	6.60098e-05	1.6701
Palld	1.92114e-11	0.693221	0.229	0.138	3.40387e-07	1.65942
Arid5b	9.98814e-09	0.664428	0.258	0.157	0.00017697	1.64331
Gm13483	4.41371e-06	0.550493	0.184	0.112	0.0782022	1.64286
Wwc1	2.40625e-10	0.795663	0.283	0.177	4.26339e-06	1.59887
Prkd1	1.50725e-32	1.03857	0.5	0.316	2.67055e-28	1.58228
Nr3c2	8.21003e-37	1.02475	0.544	0.349	1.45465e-32	1.55874
Dgkb	8.41741e-15	0.849264	0.35	0.225	1.4914e-10	1.55555
Akna	1.07807e-07	0.557195	0.208	0.134	0.00191012	1.55224
Tcf7l2	1.82777e-09	0.618013	0.315	0.205	3.23845e-05	1.53658
Apcdd1	6.70654e-07	0.434076	0.2	0.131	0.0118826	1.52672
Itga9	7.6994e-05	0.616232	0.217	0.144	1	1.50694
Col18a1	5.70899e-07	0.514811	0.183	0.122	0.0101152	1.5
Adamts12	2.07466e-06	0.547629	0.226	0.152	0.0367588	1.48684
Whrn	1.37844e-20	0.846361	0.436	0.294	2.44233e-16	1.48299
Pvt1	3.91445e-16	0.826654	0.473	0.324	6.93562e-12	1.45988
Mmp14	1.29874e-06	0.409164	0.176	0.121	0.0230111	1.45454
Adgrv1	7.07668e-07	0.480395	0.161	0.111	0.0125385	1.45045
Adamts14	3.5266e-12	0.718903	0.361	0.251	6.24842e-08	1.43825
Epha3	1.56588e-09	0.718579	0.257	0.179	2.77443e-05	1.43575
Tmem132e	0.000184353	0.533349	0.223	0.158	1	1.41139
Fbxl7	5.12183e-05	0.544544	0.235	0.167	0.907486	1.40718
Mob3b	1.78192e-08	0.60889	0.319	0.231	0.000315721	1.38095
Luzp2	1.11616e-06	0.675717	0.305	0.223	0.0197761	1.36771
Per2	8.45265e-06	0.408785	0.165	0.121	0.149764	1.36364
Fosb	1.43241e-09	0.613339	0.391	0.288	2.53794e-05	1.35764
Adamts20	8.41644e-07	0.624014	0.322	0.238	0.0149122	1.35294
Rhoq	0.000548242	0.462241	0.185	0.137	1	1.35036
Kctd8	2.9658e-08	0.807043	0.34	0.253	0.000525481	1.34387
Pard3b	5.08329e-29	0.748903	0.71	0.534	9.00657e-25	1.32959
Egr1	1.67822e-09	0.565358	0.283	0.213	2.97348e-05	1.32864
Etv1	0.0422991	0.329307	0.151	0.114	1	1.32456
Tgfb2	9.10743e-09	0.683424	0.422	0.32	0.000161365	1.31875
Ghr	2.0436e-10	0.767164	0.362	0.275	3.62085e-06	1.31636
L3mbtl3	7.2322e-08	0.519621	0.304	0.231	0.0012814	1.31602
Gsg1l	4.75353e-61	0.907162	0.907	0.69	8.42231e-57	1.31449
Spats2l	0.000523251	0.425691	0.169	0.129	1	1.31008
Cbfa2t3	5.55642e-47	0.906227	0.745	0.571	9.84486e-43	1.30473
Slc1a3	7.93836e-12	0.585331	0.48	0.371	1.40652e-07	1.2938
Barhl1	5.66644e-18	0.635524	0.489	0.38	1.00398e-13	1.28684
Nhs	1.70692e-08	0.674307	0.454	0.353	0.000302431	1.28612
Draxin	1.53853e-28	0.704683	0.747	0.581	2.72597e-24	1.28571
Fhit	6.23568e-06	0.726618	0.369	0.287	0.110484	1.28571
Vcl	0.000149264	0.512552	0.297	0.231	1	1.28571
Gria3	3.93466e-10	0.650991	0.462	0.36	6.97142e-06	1.28333
Btbd11	3.14343e-44	0.943851	0.813	0.634	5.56953e-40	1.28233
Ust	1.24362e-26	0.654912	0.618	0.483	2.20345e-22	1.2795
Sema3e	1.54768e-09	0.657798	0.288	0.226	2.74218e-05	1.27434
Ccnd1	3.60253e-14	0.574583	0.453	0.358	6.38296e-10	1.26536
Rbms3	9.91607e-13	0.496238	0.468	0.371	1.75693e-08	1.26146
Gpr153	4.95389e-06	0.473064	0.302	0.241	0.0877729	1.25311
Nkd1	2.4507e-09	0.706384	0.486	0.388	4.34215e-05	1.25258
Irs1	3.62415e-19	0.668701	0.623	0.499	6.42127e-15	1.2485
Gm48530	0.00921416	0.400037	0.183	0.147	1	1.2449
Fstl1	5.31041e-07	0.37622	0.197	0.159	0.00940898	1.23899
Nek7	1.42315e-07	0.531068	0.378	0.306	0.00252154	1.23529
Abtb2	4.87377e-07	0.489146	0.315	0.256	0.00863534	1.23047
Prmt8	2.21298e-13	0.706903	0.561	0.456	3.92095e-09	1.23026
Fos	0.0594229	0.348671	0.182	0.148	1	1.22973
Ssbp2	7.56552e-24	0.621988	0.673	0.548	1.34046e-19	1.2281
Dhx32	0.000682335	0.366926	0.18	0.147	1	1.22449
Lima1	3.49033e-06	0.347115	0.202	0.165	0.0618417	1.22424
Acer3	0.128067	0.461499	0.208	0.17	1	1.22353
Dusp10	0.22819	0.416012	0.171	0.14	1	1.22143
Dock1	2.87474e-26	0.550643	0.775	0.635	5.09346e-22	1.22047
Arhgap31	0.000168235	0.504067	0.383	0.314	1	1.21974
Rftn2	9.38538e-05	0.520616	0.34	0.279	1	1.21864
Rmst	0.000214045	0.561363	0.314	0.258	1	1.21705
Smad3	5.03527e-07	0.490171	0.303	0.249	0.0089215	1.21687
Slc44a5	1.37257e-05	0.350259	0.174	0.143	0.243191	1.21678
Hectd2	0.000975981	0.515743	0.35	0.288	1	1.21528
Itgb8	1.75307e-06	0.423233	0.257	0.212	0.0310608	1.21226
Rftn1	3.08553e-16	0.572198	0.6	0.497	5.46695e-12	1.20724
Rpl3	0.849288	0.30556	0.16	0.133	1	1.20301
Tmem196	0.0109239	0.340281	0.209	0.174	1	1.20115
Ntrk3	4.55879e-88	1.20176	0.956	0.796	8.07727e-84	1.201
Arhgap42	4.65004e-06	0.402285	0.318	0.265	0.0823894	1.2
Tead2	0.00796185	0.388179	0.27	0.225	1	1.2
Epb41l4b	2.01343e-05	0.388582	0.234	0.195	0.356739	1.2
Hhip	1.30017e-08	0.493064	0.333	0.278	0.000230364	1.19784
Sipa1l2	2.94843e-09	0.759012	0.437	0.365	5.22402e-05	1.19726
Sept8	3.00114e-05	0.369928	0.189	0.158	0.531742	1.1962
Epha5	0.000121529	0.472183	0.238	0.199	1	1.19598
Robo2	5.02095e-69	1.06647	0.915	0.769	8.89611e-65	1.18986
Pou3f2	6.17609e-05	0.396565	0.227	0.191	1	1.18848
Prkag2	3.8498e-05	0.42104	0.303	0.255	0.682107	1.18823
Ezr	0.00488133	0.469292	0.278	0.234	1	1.18803
Map2k6	1.79795e-05	0.497233	0.38	0.32	0.318561	1.1875
Grid2	2.22939e-33	0.685589	0.82	0.691	3.95003e-29	1.18669
Lpin2	2.08139e-05	0.54788	0.421	0.355	0.36878	1.18592
Ntm	8.91023e-25	0.739913	0.764	0.645	1.57872e-20	1.1845
Mamdc2	0.00795488	0.406906	0.22	0.186	1	1.1828
Col4a2	0.0894564	0.264578	0.227	0.192	1	1.18229
Sema7a	4.6057e-15	0.538357	0.596	0.505	8.16038e-11	1.1802
Igdcc4	4.00695e-08	0.483682	0.466	0.395	0.000709952	1.17975
Ikzf2	5.75556e-07	0.34956	0.218	0.185	0.0101977	1.17838
Trps1	5.53323e-15	0.594182	0.685	0.582	9.80377e-11	1.17698
Phkb	0.00234012	0.466067	0.364	0.31	1	1.17419
Ncor2	9.88895e-51	0.830336	0.924	0.787	1.75212e-46	1.17408
Sgcd	6.06298e-07	0.465693	0.487	0.415	0.0107424	1.17349
Tenm3	1.96212e-05	0.535119	0.4	0.341	0.347649	1.17302
Angptl2	0.0312159	0.346274	0.204	0.174	1	1.17241
Cttnbp2	0.000166767	0.431246	0.323	0.276	1	1.17029
Baz1a	6.15539e-05	0.426418	0.346	0.296	1	1.16892
Sash1	0.0778092	0.256247	0.208	0.178	1	1.16854
Ptch1	2.32169e-57	0.806003	0.923	0.791	4.11357e-53	1.16688
Gnl3	0.0162369	0.385385	0.274	0.236	1	1.16102
Mybbp1a	0.103135	0.324356	0.195	0.168	1	1.16071
Boc	1.08985e-17	0.508517	0.742	0.64	1.93099e-13	1.15937
Itsn2	0.113942	0.342238	0.25	0.216	1	1.15741
Cdk6	3.24848e-33	0.598295	0.898	0.776	5.75566e-29	1.15722
Grin3a	0.00126627	0.459992	0.265	0.229	1	1.1572
Plscr4	0.232205	0.283055	0.155	0.134	1	1.15672
Slc1a2	1.39909e-24	0.64485	0.703	0.609	2.47891e-20	1.15435
Ptch2	8.41435e-10	0.526172	0.518	0.45	1.49086e-05	1.15111
Rpsa	0.354603	0.3366	0.22	0.192	1	1.14583
Rassf3	4.34306e-13	0.506746	0.624	0.545	7.69503e-09	1.14495
Rpl13a	0.00292337	0.351595	0.248	0.217	1	1.14286
Tmtc1	0.000396557	0.468566	0.345	0.302	1	1.14238
Arhgap26	0.00443633	0.291272	0.215	0.189	1	1.13757
Pde7b	0.155502	0.310138	0.191	0.168	1	1.1369
Npm1	0.046716	0.371913	0.299	0.263	1	1.13688
Fat1	0.0001612	0.387813	0.292	0.257	1	1.13619
Pde4b	3.85188e-06	0.323253	0.588	0.518	0.0682476	1.13513
Pcx	0.0623364	0.406456	0.237	0.209	1	1.13397
Cdh8	0.00086277	0.446913	0.365	0.322	1	1.13354
Eef1g	0.0308598	0.304699	0.188	0.166	1	1.13253
Gli3	0.00064887	0.281856	0.197	0.174	1	1.13218
Zfp462	1.4824e-12	0.503869	0.605	0.535	2.62652e-08	1.13084
Cadm1	5.30817e-32	0.51632	0.919	0.813	9.40501e-28	1.13038
Rps5	0.409688	0.283965	0.17	0.151	1	1.12583
Ccdc88c	0.024674	0.385471	0.314	0.279	1	1.12545
Cdh20	1.31518e-56	0.761465	0.984	0.876	2.33023e-52	1.12329
Lrig3	1.57853e-07	0.393066	0.543	0.485	0.00279685	1.11959
Zmiz1	2.01094e-77	0.978539	0.932	0.834	3.56299e-73	1.11751
Tshz2	1.06514e-12	0.509896	0.843	0.755	1.88722e-08	1.11656
Eef1a1	0.00011915	0.427645	0.404	0.362	1	1.11602
Parva	0.027588	0.331726	0.223	0.2	1	1.115
Maml2	6.26175e-25	0.575308	0.866	0.777	1.10946e-20	1.11454
Ptprg	6.87681e-59	0.915933	0.918	0.825	1.21843e-54	1.11273
Nxpe4	0.00290897	0.407726	0.398	0.358	1	1.11173
Prdm5	0.266256	0.289861	0.17	0.153	1	1.11111
Tle1	1.88028e-09	0.499453	0.582	0.525	3.33148e-05	1.10857
Cyp7b1	0.00228738	0.324942	0.28	0.253	1	1.10672
Cc2d2a	0.0698782	0.317459	0.218	0.197	1	1.1066
Ddx21	0.592987	0.30084	0.198	0.179	1	1.10614
Rack1	0.0158828	0.284424	0.179	0.162	1	1.10494
Sfrp1	1.50016e-06	0.438797	0.518	0.469	0.0265798	1.10448
Eya4	0.000182854	0.418029	0.394	0.357	1	1.10364
Sacs	2.52625e-05	0.422454	0.533	0.483	0.447601	1.10352
Cbx5	7.05064e-08	0.434263	0.595	0.54	0.00124923	1.10185
Utp20	0.506878	0.257331	0.196	0.178	1	1.10112
Foxp2	2.63994e-09	0.312149	0.889	0.808	4.67745e-05	1.10025
Lpp	1.05414e-08	0.396764	0.512	0.466	0.000186772	1.09871
Samd4	0.0817502	0.354421	0.213	0.194	1	1.09794
Dpyd	0.177763	0.29457	0.202	0.184	1	1.09783
Gas5	0.352711	0.355024	0.281	0.256	1	1.09766
Pabpc1	0.0019771	0.352566	0.315	0.287	1	1.09756
Med12l	3.68585e-07	0.354877	0.529	0.483	0.00653058	1.09524
Jun	0.0656374	0.395771	0.347	0.317	1	1.09464
Egfem1	3.87245e-07	0.591115	0.513	0.469	0.00686121	1.09382
Mib1	6.2198e-12	0.456724	0.537	0.491	1.10202e-07	1.09369
Stx6	5.70764e-05	0.398516	0.366	0.335	1	1.09254
Akap13	0.00174616	0.33538	0.486	0.445	1	1.09213
Nalcn	2.0587e-09	0.478327	0.582	0.533	3.64761e-05	1.09193
Pdzrn4	9.48608e-05	0.489764	0.404	0.37	1	1.09189
Kcnh7	1.96108e-41	1.12219	0.852	0.781	3.47464e-37	1.09091
Tacc1	0.773674	0.304494	0.23	0.211	1	1.09005
Rpl4	0.000110212	0.344286	0.309	0.284	1	1.08803
Polr1a	0.701935	0.271432	0.186	0.171	1	1.08772
Epb41l5	0.304633	0.29652	0.199	0.183	1	1.08743
Pcdh7	0.00066401	0.293094	0.405	0.373	1	1.08579
Med25	0.106881	0.299169	0.19	0.175	1	1.08571
Tmem55a	0.121411	0.298517	0.19	0.175	1	1.08571
Dnmt3a	3.83496e-05	0.320817	0.306	0.282	0.679479	1.08511
Cerk	0.516354	0.350972	0.268	0.247	1	1.08502
Alkbh1	0.00248539	0.302736	0.253	0.234	1	1.0812
Bcl11a	0.000227889	0.362702	0.453	0.419	1	1.08115
Kank1	0.0535471	0.336937	0.2	0.185	1	1.08108
Mdga1	9.99605e-12	0.45526	0.707	0.654	1.7711e-07	1.08104
Srf	0.0976955	0.261751	0.161	0.149	1	1.08054
Adamts6	2.96918e-06	0.347847	0.534	0.495	0.052608	1.07879
Trp53	0.214438	0.267177	0.192	0.178	1	1.07865
Robo1	0.000121081	0.386646	0.604	0.56	1	1.07857
Rgma	0.138612	0.367957	0.261	0.242	1	1.07851
Grb10	0.00819364	0.28229	0.225	0.209	1	1.07655
Kcnh5	0.613466	0.368998	0.31	0.288	1	1.07639
Smoc1	2.28744e-08	0.452402	0.463	0.431	0.000405288	1.07425
Gtf3c1	3.01006e-06	0.400358	0.454	0.423	0.0533322	1.07329
Gm20388	0.000382421	0.389042	0.621	0.579	1	1.07254
Tpcn1	0.00169922	0.359825	0.432	0.403	1	1.07196
Vgll4	0.050987	0.332283	0.284	0.265	1	1.0717
Adk	0.00600461	0.360694	0.495	0.462	1	1.07143
Magi2	4.12154e-19	0.445379	0.904	0.844	7.30255e-15	1.07109
Cdh12	0.173164	0.371348	0.186	0.174	1	1.06896
Disp3	0.0374532	0.356042	0.292	0.274	1	1.06569
Crim1	0.0587304	0.277676	0.196	0.184	1	1.06522
Abcc1	0.00122319	0.26263	0.23	0.216	1	1.06481
Eif4a1	0.0966483	0.314912	0.28	0.263	1	1.06464
Zfp516	0.000377588	0.315464	0.249	0.234	1	1.0641
Naaladl2	0.000172048	0.411525	0.438	0.412	1	1.06311
Gse1	5.98016e-20	0.453642	0.879	0.827	1.05956e-15	1.06288
Xrcc5	0.203069	0.280279	0.272	0.256	1	1.0625
Dph6	0.114958	0.28477	0.227	0.214	1	1.06075
Zeb1	1.29146e-75	0.791613	0.989	0.935	2.28821e-71	1.05775
Sox4	0.602516	0.311172	0.229	0.217	1	1.0553
Wdr43	0.0445993	0.306257	0.344	0.326	1	1.05521
Rnd3	0.00213823	0.323238	0.406	0.385	1	1.05455
Nedd4	1.64391e-20	0.385637	0.841	0.798	2.91267e-16	1.05388
Mir99ahg	6.23179e-18	0.46276	0.924	0.877	1.10415e-13	1.05359
Hdac9	1.04351e-06	0.303452	0.723	0.688	0.0184888	1.05087
Nckap5l	0.043517	0.30211	0.272	0.259	1	1.05019
Uri1	0.00235379	0.286161	0.317	0.302	1	1.04967
Bahcc1	8.82684e-09	0.405766	0.53	0.505	0.000156394	1.0495
Rora	1.80361e-37	0.526032	0.961	0.916	3.19563e-33	1.04913
Mipol1	0.050991	0.289419	0.237	0.226	1	1.04867
Tead1	0.000148559	0.349299	0.726	0.693	1	1.04762
Nkain3	0.000822254	0.500309	0.586	0.56	1	1.04643
Pqlc1	0.000901293	0.272843	0.249	0.238	1	1.04622
Map3k1	2.57315e-11	0.271709	0.974	0.933	4.55911e-07	1.04394
Phf21a	2.68334e-09	0.347489	0.766	0.734	4.75434e-05	1.0436
Tbc1d16	0.000439223	0.362867	0.54	0.518	1	1.04247
Map4k4	2.95091e-20	0.435432	0.895	0.859	5.22842e-16	1.04191
Cbfa2t2	0.00209299	0.401439	0.547	0.525	1	1.0419
Thsd4	0.186324	0.437318	0.249	0.239	1	1.04184
Efna5	5.60048e-07	0.336026	0.548	0.526	0.00992293	1.04182
Mdn1	0.00735188	0.320071	0.425	0.408	1	1.04167
Ncl	0.0181971	0.295101	0.577	0.554	1	1.04152
Taf1d	0.12838	0.331978	0.379	0.364	1	1.04121
Diaph2	0.000722015	0.252228	0.457	0.439	1	1.041
Zeb2	4.76961e-06	0.262955	0.734	0.706	0.084508	1.03966
Sipa1l1	0.269317	0.257631	0.184	0.177	1	1.03955
Kdm6b	0.0704194	0.279173	0.334	0.322	1	1.03727
Cplx2	0.000110188	0.301963	0.305	0.295	1	1.0339
Cdc14a	0.00806442	0.284372	0.281	0.272	1	1.03309
Wwox	4.99399e-06	0.352419	0.664	0.643	0.0884836	1.03266
Meis1	4.04751e-15	0.427912	0.908	0.88	7.17138e-11	1.03182
Tmem163	0.0535885	0.373305	0.655	0.635	1	1.0315
Lama5	0.491532	0.372847	0.23	0.223	1	1.03139
Ppp1r9a	0.000172604	0.339559	0.628	0.609	1	1.0312
Rgs20	0.215692	0.288314	0.407	0.395	1	1.03038
Adgrb3	7.40061e-13	0.30733	0.967	0.94	1.31124e-08	1.02872
Mgat4c	0.00357354	0.691677	0.288	0.28	1	1.02857
Sesn3	0.0156608	0.264713	0.184	0.179	1	1.02793
Rbfox3	3.42304e-14	0.588631	0.9	0.876	6.06494e-10	1.0274
Nck2	0.000182493	0.354428	0.452	0.44	1	1.02727
Ralgapa2	0.000118327	0.351922	0.643	0.627	1	1.02552
Hdac4	0.000355749	0.333173	0.524	0.511	1	1.02544
Dync2h1	3.06431e-05	0.314933	0.49	0.478	0.542935	1.0251
Stk3	0.0021884	0.287463	0.452	0.441	1	1.02494
Tmem245	0.1254	0.27397	0.296	0.289	1	1.02422
Phf21b	4.21761e-06	0.293303	0.428	0.418	0.0747277	1.02392
Prkdc	0.123463	0.254936	0.217	0.212	1	1.02358
Ccnjl	0.0792044	0.254561	0.224	0.219	1	1.02283
Snx5	0.0102327	0.257315	0.225	0.22	1	1.02273
mt-Nd5	0.00175088	0.294059	0.41	0.401	1	1.02244
Cdkal1	0.000127605	0.285245	0.629	0.616	1	1.0211
Hs3st5	4.79153e-07	0.251787	0.799	0.783	0.00848963	1.02043
Hsp90ab1	1.66836e-05	0.270399	0.656	0.643	0.295599	1.02022
Coro2b	7.05198e-05	0.310636	0.665	0.652	1	1.01994
Gm26883	0.284164	0.279789	0.26	0.255	1	1.01961
Eif4a2	0.0452486	0.273573	0.316	0.311	1	1.01608
Zfhx3	0.000149369	0.264789	0.635	0.625	1	1.016
Zc3h12b	0.0724576	0.282337	0.342	0.337	1	1.01484
Sdk1	0.000393154	0.273424	0.686	0.676	1	1.01479
Eef2	0.0684699	0.273072	0.361	0.356	1	1.01404
Rai1	0.000184272	0.251451	0.663	0.654	1	1.01376
Peak1	0.428131	0.284561	0.379	0.374	1	1.01337
Kif21a	0.255959	0.281734	0.581	0.574	1	1.01219
Ror2	0.749444	0.28531	0.282	0.279	1	1.01075
Cbfb	0.751763	0.261966	0.318	0.315	1	1.00952
Mia2	0.306135	0.27236	0.319	0.316	1	1.00949
mt-Cytb	0.00493597	0.266506	0.427	0.423	1	1.00946
Zbtb20	2.17333e-08	0.259713	0.982	0.973	0.00038507	1.00925
mt-Rnr1	8.70599e-23	0.388238	0.998	0.991	1.54253e-18	1.00706
Bcas3	0.0046536	0.288711	0.585	0.581	1	1.00688
mt-Rnr2	5.171e-22	0.387152	0.999	0.993	9.16199e-18	1.00604
Ebf2	0.230577	0.339142	0.346	0.344	1	1.00581
Fam19a5	0.267157	0.290142	0.365	0.363	1	1.00551
Nfia	4.92053e-66	0.466825	1	0.995	8.7182e-62	1.00503
Lrba	0.00204364	0.283904	0.699	0.696	1	1.00431
Cblb	0.00800111	0.277466	0.531	0.531	1	1
Eif3a	0.0111183	0.27275	0.507	0.507	1	1
Sncaip	0.00210981	0.301316	0.45	0.45	1	1
Tet2	0.19103	0.251947	0.382	0.383	1	0.997389
Airn	0.348877	0.265397	0.352	0.353	1	0.997167
Rnf220	0.143649	0.29381	0.701	0.703	1	0.997155
Zfp266	0.00552435	0.252351	0.343	0.344	1	0.997093
mt-Co1	0.00329997	0.262613	0.329	0.33	1	0.996969
Gm2694	0.932351	0.252876	0.29	0.291	1	0.996563
Immp2l	0.383453	0.279549	0.196	0.197	1	0.994923
Adarb2	0.00162929	0.268308	0.598	0.603	1	0.991708
Zc3h12c	0.506158	0.275797	0.325	0.328	1	0.990853
Nlgn1	0.000477177	0.265772	0.839	0.847	1	0.990555
Ap3b1	0.00201777	0.252031	0.437	0.443	1	0.986456
Grik2	1.72007e-14	-0.338117	0.93	0.946	3.04763e-10	0.983087
Celf2	1.13776e-33	-0.613413	0.944	0.964	2.01588e-29	0.979253
Pde4dip	0.00362848	0.30687	0.615	0.631	1	0.974643
Auts2	1.49446e-27	-0.482136	0.949	0.975	2.64788e-23	0.973333
Slc2a13	0.570902	0.273401	0.406	0.424	1	0.957547
Ank3	6.21137e-30	-0.51639	0.89	0.933	1.10053e-25	0.953912
Nrxn1	3.49279e-09	-0.289164	0.878	0.921	6.18852e-05	0.953312
Reln	2.26584e-10	-0.343506	0.836	0.885	4.01462e-06	0.944633
Erbb4	4.07917e-33	-0.786319	0.865	0.92	7.22748e-29	0.940217
Pde1c	2.00351e-21	-0.539271	0.801	0.866	3.54982e-17	0.924942
Prkg1	0.529254	-0.275492	0.157	0.17	1	0.923529
Ralyl	0.344989	0.274592	0.306	0.332	1	0.921686
Nedd4l	1.34587e-06	-0.273807	0.738	0.804	0.0238461	0.91791
Fam155a	1.26772e-11	-0.367477	0.825	0.9	2.24615e-07	0.916667
Gria4	2.68195e-10	-0.441407	0.783	0.857	4.75187e-06	0.913652
Nav2	1.54195e-44	-0.766633	0.877	0.963	2.73202e-40	0.910696
Ebf1	2.8478e-16	-0.327296	0.833	0.915	5.04573e-12	0.910382
Thsd7a	7.35931e-17	-0.439424	0.755	0.83	1.30392e-12	0.909638
Nav1	1.19905e-08	-0.271268	0.787	0.866	0.000212448	0.908776
Pde4d	1.19591e-17	-0.627732	0.82	0.903	2.11892e-13	0.908084
Zfpm2	0.000705505	-0.811041	0.641	0.706	1	0.907932
Ccser1	1.92511e-26	-0.533026	0.803	0.888	3.41091e-22	0.904279
Ank2	1.24593e-27	-0.638288	0.82	0.908	2.20753e-23	0.903084
Astn2	5.20622e-35	-0.673054	0.799	0.894	9.22437e-31	0.893736
Ptprm	0.341506	-0.343455	0.209	0.235	1	0.889361
Pbx3	2.40419e-13	-0.379949	0.753	0.853	4.25974e-09	0.882767
Ncam1	1.36186e-24	-0.420394	0.783	0.888	2.41294e-20	0.881757
Adgrl3	0.00252926	-0.262415	0.603	0.686	1	0.879009
Ptprs	2.10895e-12	-0.464595	0.694	0.797	3.73665e-08	0.870765
Anks1b	0.00152082	-0.312931	0.646	0.742	1	0.87062
Tmem178b	1.31644e-08	-0.345876	0.706	0.817	0.000233247	0.864137
Ppp3ca	4.28514e-06	-0.285964	0.696	0.806	0.0759241	0.863523
Cadps	4.63127e-14	-0.421045	0.7	0.823	8.20569e-10	0.850547
Zfp536	2.48353e-05	-0.261678	0.608	0.717	0.440032	0.847978
Fmnl2	5.1862e-10	-0.302577	0.634	0.751	9.1889e-06	0.844208
Zfp704	1.62057e-08	-0.282319	0.593	0.708	0.000287133	0.837571
Map2	3.29078e-31	-0.620179	0.716	0.858	5.8306e-27	0.834499
Trio	3.19846e-11	-0.31843	0.62	0.749	5.66704e-07	0.82777
Phactr1	7.92314e-14	-0.314247	0.649	0.788	1.40382e-09	0.823604
Ctnna2	1.70391e-62	-0.892022	0.745	0.905	3.01899e-58	0.823204
Trpm3	0.186166	-0.548231	0.183	0.223	1	0.820627
Tnik	5.40036e-20	-0.693808	0.623	0.76	9.56835e-16	0.819737
Sobp	4.89667e-11	-0.372928	0.609	0.744	8.67593e-07	0.818548
Lhfpl3	0.00141416	-0.791649	0.133	0.163	1	0.81595
Frmd4a	1.33224e-24	-0.711776	0.697	0.858	2.36046e-20	0.812354
Apc	1.75638e-22	-0.544898	0.646	0.798	3.11195e-18	0.809524
Srrm4	6.84788e-09	-0.306805	0.577	0.716	0.000121331	0.805866
Kif5c	6.80964e-14	-0.303809	0.541	0.672	1.20653e-09	0.805059
Fgf14	0.00135877	-0.718156	0.272	0.341	1	0.797654
Cep170	7.22102e-08	-0.258788	0.515	0.649	0.00127942	0.793528
Enox1	1.19576e-15	-0.558077	0.595	0.761	2.11865e-11	0.781866
Zic1	3.01533e-08	-0.251897	0.473	0.606	0.000534257	0.780528
Afdn	3.65627e-07	-0.253884	0.468	0.603	0.00647818	0.776119
Phf20l1	3.24361e-07	-0.253698	0.453	0.584	0.00574703	0.775685
Pde3a	3.06529e-06	-0.254122	0.445	0.576	0.0543107	0.772569
Cask	2.92973e-08	-0.375141	0.498	0.649	0.000519089	0.767334
Mapk10	1.18789e-09	-0.373655	0.487	0.636	2.1047e-05	0.765723
Zfp521	1.17139e-18	-0.74776	0.533	0.702	2.07547e-14	0.759259
Gria2	2.93739e-19	-0.494147	0.58	0.764	5.20448e-15	0.759162
Gm4258	4.48211e-14	-0.364778	0.461	0.608	7.94141e-10	0.758224
Prkcb	1.01859e-42	-0.775641	0.651	0.859	1.80474e-38	0.757858
Nsd2	2.43914e-10	-0.362855	0.496	0.656	4.32167e-06	0.756097
Tmtc2	1.22256e-11	-0.557194	0.452	0.599	2.16614e-07	0.754591
Epb41	0.000230478	-0.255928	0.426	0.565	1	0.753982
Edil3	2.28111e-15	-0.518648	0.501	0.667	4.04167e-11	0.751124
Enah	4.24649e-06	-0.253146	0.422	0.562	0.0752393	0.75089
Fat3	0.000531886	-0.301032	0.307	0.41	1	0.74878
Ssh2	1.5975e-08	-0.264074	0.426	0.57	0.000283044	0.747368
Il1rapl1	0.000349082	-0.357391	0.36	0.482	1	0.746888
Hectd4	4.51629e-07	-0.259586	0.392	0.526	0.00800195	0.745247
Pde3b	6.26462e-11	-0.317424	0.446	0.6	1.10997e-06	0.743333
Dlgap1	2.15148e-09	-0.494176	0.46	0.62	3.81199e-05	0.741935
Phlpp1	9.29399e-06	-0.263132	0.402	0.543	0.164671	0.740331
Basp1	7.94254e-12	-0.388481	0.435	0.591	1.40726e-07	0.73604
Sema6d	1.86173e-06	-0.385406	0.347	0.474	0.0329862	0.732067
Bicd1	7.98306e-10	-0.330379	0.417	0.57	1.41444e-05	0.731579
Tnrc6c	1.3491e-09	-0.251623	0.374	0.512	2.39034e-05	0.730469
Msra	3.2108e-07	-0.43891	0.357	0.489	0.00568889	0.730061
Kcnb2	1.25123e-46	-1.01542	0.592	0.811	2.21693e-42	0.729963
Itsn1	1.31193e-06	-0.307843	0.407	0.558	0.0232449	0.729391
Macrod2	3.17211e-24	-0.62031	0.53	0.729	5.62035e-20	0.727023
Fyn	8.85247e-10	-0.412364	0.426	0.586	1.56848e-05	0.726962
Rbfox1	5.61969e-60	-1.20879	0.624	0.859	9.95696e-56	0.726426
Nav3	2.1049e-39	-0.849337	0.568	0.782	3.72945e-35	0.726343
Dcx	7.86809e-09	-0.448607	0.405	0.558	0.000139407	0.725806
Ppp2r2c	3.90638e-12	-0.437308	0.48	0.662	6.92132e-08	0.725075
Cnksr2	1.00717e-14	-0.414159	0.426	0.589	1.7845e-10	0.72326
Cog7	7.30939e-06	-0.261416	0.354	0.491	0.129508	0.720977
Astn1	7.81611e-11	-0.345143	0.378	0.526	1.38486e-06	0.718631
Dpysl2	5.1346e-06	-0.25247	0.362	0.504	0.0909748	0.718254
Pak7	1.86004e-17	-0.577084	0.469	0.653	3.29562e-13	0.718223
Nova1	8.05303e-10	-0.332124	0.384	0.535	1.42684e-05	0.717757
Rad51b	1.37175e-07	-0.27406	0.283	0.395	0.00243046	0.716456
Sv2b	8.57343e-12	-0.3881	0.426	0.597	1.51904e-07	0.713568
Ptprn2	6.88569e-15	-0.346604	0.393	0.552	1.22001e-10	0.711956
Grid1	6.68914e-09	-0.373606	0.336	0.472	0.000118518	0.711864
Mbp	0.0287391	-0.479132	0.158	0.222	1	0.711711
Plcb1	1.74227e-33	-0.867155	0.535	0.755	3.08696e-29	0.708609
Sptan1	4.02956e-06	-0.292835	0.333	0.47	0.0713957	0.70851
Smc2	2.91945e-10	-0.39579	0.325	0.459	5.17268e-06	0.708061
Ldlrad4	3.481e-06	-0.29442	0.331	0.469	0.0616763	0.705757
Elavl3	6.37392e-21	-0.486879	0.434	0.617	1.12933e-16	0.703403
Utrn	4.98114e-05	-0.400557	0.251	0.357	0.882558	0.703081
Erc1	1.48395e-11	-0.301346	0.343	0.488	2.62927e-07	0.702869
Myo10	5.85509e-05	-0.315121	0.27	0.385	1	0.701299
Srgap2	5.81347e-24	-0.675645	0.504	0.72	1.03003e-19	0.7
Gpcpd1	0.000392891	-0.309977	0.19	0.272	1	0.698529
Apbb2	0.00203881	-0.309512	0.22	0.315	1	0.698412
Galnt13	5.97625e-06	-0.284584	0.266	0.382	0.105887	0.696335
Asxl3	2.85557e-06	-0.296612	0.314	0.452	0.0505949	0.69469
Farp1	8.44858e-07	-0.28565	0.307	0.443	0.0149692	0.693002
Pclo	1.87468e-12	-0.400678	0.329	0.475	3.32156e-08	0.692631
Ctif	2.53799e-16	-0.466915	0.421	0.608	4.49681e-12	0.692434
Fnbp1l	4.64741e-15	-0.344098	0.363	0.526	8.23429e-11	0.690114
Dock3	1.95509e-15	-0.406032	0.402	0.583	3.46402e-11	0.689537
Soga1	5.65719e-13	-0.394477	0.378	0.551	1.00234e-08	0.686025
Gtdc1	6.51702e-14	-0.38283	0.39	0.569	1.15468e-09	0.685413
Unc79	1.84552e-07	-0.287017	0.316	0.462	0.00326989	0.683983
Tiam1	3.92203e-12	-0.313925	0.35	0.512	6.94905e-08	0.683594
Dync1i2	5.03963e-09	-0.262513	0.299	0.438	8.92922e-05	0.682648
Jakmip2	3.97744e-10	-0.277954	0.31	0.455	7.04722e-06	0.681319
Tmpo	1.70168e-06	-0.332596	0.297	0.436	0.0301504	0.681193
Ccbe1	2.13834e-07	-0.276774	0.226	0.332	0.00378871	0.680723
Otud7a	2.77666e-12	-0.326258	0.285	0.419	4.91968e-08	0.680191
Rab6b	1.14892e-07	-0.348477	0.301	0.443	0.00203565	0.679458
Cdk5rap2	3.92253e-10	-0.42759	0.344	0.507	6.94995e-06	0.678501
Negr1	4.04134e-18	-0.613006	0.461	0.682	7.16045e-14	0.675953
Csmd2	0.000645671	-0.30834	0.165	0.245	1	0.673469
Rps6ka3	4.71429e-09	-0.368265	0.277	0.412	8.35278e-05	0.67233
Cacna2d3	1.2497e-06	-0.48285	0.274	0.408	0.0221421	0.671568
Rab3c	4.43066e-17	-0.39105	0.348	0.519	7.85024e-13	0.67052
Mpped2	2.12429e-07	-0.279043	0.282	0.421	0.00376382	0.669834
Pax6	1.59655e-13	-0.348225	0.316	0.476	2.82877e-09	0.663865
Synpr	0.000179102	-0.342259	0.237	0.357	1	0.663865
Tuba1a	2.05174e-11	-0.316375	0.282	0.425	3.63527e-07	0.663529
Scmh1	1.76288e-18	-0.541634	0.404	0.609	3.12348e-14	0.663382
Kirrel3	0.000459435	-0.720594	0.108	0.163	1	0.662576
Epb41l2	0.000663783	-0.403906	0.233	0.352	1	0.661932
Kcnd2	1.03876e-07	-1.00899	0.178	0.27	0.00184047	0.659259
Gabrb3	5.0937e-16	-0.457053	0.348	0.528	9.02501e-12	0.659091
Cadps2	3.56907e-15	-0.91186	0.311	0.474	6.32368e-11	0.656118
Osbpl9	0.00093488	-0.273106	0.242	0.369	1	0.655826
Brd8	3.63951e-13	-0.355578	0.283	0.433	6.44848e-09	0.65358
Ano4	6.63643e-06	-0.253116	0.158	0.242	0.117584	0.652892
Galnt17	1.06997e-11	-0.368902	0.287	0.44	1.89577e-07	0.652273
Gpr137c	1.05119e-06	-0.323926	0.253	0.388	0.018625	0.652062
Kcnq5	1.03097e-18	-1.00249	0.352	0.541	1.82667e-14	0.650647
Lhx1	1.01844e-08	-0.26532	0.203	0.312	0.000180447	0.650641
Sox11	5.60918e-21	-0.60467	0.371	0.571	9.93834e-17	0.649737
Calm2	1.05428e-11	-0.277132	0.265	0.408	1.86797e-07	0.64951
Dpp6	6.67391e-11	-0.475971	0.262	0.404	1.18248e-06	0.648515
Hjurp	5.06661e-17	-0.583853	0.335	0.517	8.97701e-13	0.647969
Zfp423	5.79243e-25	-0.619639	0.365	0.564	1.0263e-20	0.647163
Opcml	9.04389e-15	-1.06913	0.306	0.473	1.6024e-10	0.646934
Arhgef2	2.03678e-11	-0.270517	0.252	0.39	3.60877e-07	0.646154
Camk2d	4.35501e-08	-0.474119	0.267	0.414	0.000771621	0.644927
Igsf21	1.18585e-06	-0.342806	0.247	0.383	0.0210109	0.644908
Brsk2	2.66231e-10	-0.331824	0.245	0.381	4.71707e-06	0.643044
Sorbs1	1.91703e-29	-0.743404	0.405	0.63	3.3966e-25	0.642857
Mast2	1.93165e-24	-0.422056	0.346	0.539	3.4225e-20	0.641929
Prkce	2.371e-12	-0.46262	0.311	0.485	4.20095e-08	0.641237
Add2	1.18745e-08	-0.322498	0.224	0.35	0.000210393	0.64
Mtss1	9.8841e-24	-0.751253	0.385	0.606	1.75126e-19	0.635313
Arhgef7	8.0345e-13	-0.383014	0.283	0.446	1.42355e-08	0.634529
C2cd5	5.65416e-12	-0.299453	0.262	0.413	1.0018e-07	0.634382
Git2	3.00289e-09	-0.374073	0.278	0.44	5.32052e-05	0.631818
Kcnma1	2.96305e-11	-0.279415	0.235	0.372	5.24994e-07	0.63172
Fgf13	2.15901e-21	-0.829994	0.384	0.61	3.82533e-17	0.629508
Xkr6	1.78307e-09	-0.486163	0.285	0.453	3.15924e-05	0.629139
Frmd5	1.37631e-23	-0.58421	0.34	0.543	2.43855e-19	0.626151
Syt11	4.47142e-07	-0.285321	0.214	0.342	0.00792246	0.625731
Kcnip3	3.71684e-09	-0.274942	0.157	0.251	6.58549e-05	0.625498
Cenpc1	5.81467e-06	-0.258742	0.202	0.323	0.103024	0.625387
Tubb5	3.08196e-06	-0.297818	0.232	0.371	0.0546061	0.625337
Ncapd3	6.32693e-08	-0.311867	0.218	0.35	0.00112101	0.622857
Sept11	7.76399e-10	-0.360461	0.235	0.378	1.37562e-05	0.621693
Sema6a	1.71239e-44	-1.06181	0.434	0.699	3.03402e-40	0.620887
Mical3	2.42534e-06	-0.257721	0.189	0.305	0.0429722	0.619672
Cdh13	4.03771e-12	-0.57939	0.253	0.41	7.15402e-08	0.617073
Miat	6.33649e-53	-1.07419	0.467	0.757	1.1227e-48	0.616909
Pkp4	1.89553e-16	-0.560185	0.288	0.467	3.3585e-12	0.616702
Clmp	1.64659e-17	-0.543183	0.301	0.49	2.91743e-13	0.614286
Hivep3	4.43824e-12	-0.743449	0.253	0.412	7.86367e-08	0.614078
Pcsk2	1.09071e-13	-0.410263	0.24	0.391	1.93252e-09	0.613811
Gab1	1.84811e-08	-0.439838	0.268	0.438	0.000327449	0.611872
Map1b	7.73165e-47	-0.956451	0.421	0.69	1.36989e-42	0.610145
Afap1	2.44026e-12	-0.466143	0.278	0.456	4.32366e-08	0.609649
Nnat	2.18731e-17	-0.37775	0.207	0.34	3.87547e-13	0.608823
Lrp1	1.24993e-08	-0.327507	0.134	0.221	0.000221462	0.606335
Dab2ip	2.15743e-05	-0.267051	0.16	0.264	0.382254	0.60606
Myo1b	2.14281e-08	-0.437196	0.188	0.311	0.000379663	0.604501
Hivep2	1.63512e-18	-0.67076	0.322	0.534	2.8971e-14	0.602996
Syne1	8.56939e-10	-0.611725	0.169	0.281	1.51832e-05	0.601423
Stard13	1.68286e-06	-0.342172	0.095	0.158	0.0298169	0.601265
Atad2	8.24858e-07	-0.351252	0.194	0.323	0.0146148	0.600619
Usp46	7.32811e-06	-0.255613	0.171	0.285	0.129839	0.6
Nkain1	4.45906e-08	-0.310653	0.166	0.277	0.000790056	0.599278
Tll1	4.18467e-11	-0.332313	0.197	0.329	7.4144e-07	0.598784
Rad21	1.96693e-08	-0.407688	0.231	0.386	0.000348501	0.598445
Plxnb2	1.89544e-10	-0.492404	0.247	0.414	3.35835e-06	0.596618
Ntn4	1.22399e-13	-0.441948	0.24	0.403	2.16866e-09	0.595533
Gm17750	6.51719e-08	-0.272643	0.17	0.286	0.00115472	0.594405
Mctp1	6.67168e-06	-0.302264	0.112	0.189	0.118209	0.592592
Cacnb4	5.61192e-14	-0.335942	0.152	0.257	9.94321e-10	0.591439
Bin1	1.03515e-14	-0.465703	0.24	0.406	1.83407e-10	0.591133
Klhl29	9.22521e-40	-1.18297	0.38	0.644	1.63452e-35	0.590062
Crybg3	3.63561e-08	-0.283869	0.174	0.295	0.000644157	0.58983
Xkr7	3.97249e-10	-0.28117	0.172	0.292	7.03846e-06	0.589041
Mgat5b	1.53705e-15	-0.431866	0.235	0.399	2.72335e-11	0.588972
Dock9	3.95273e-05	-0.40528	0.096	0.163	0.700344	0.588957
Camk1d	1.9155e-08	-0.300529	0.133	0.226	0.000339389	0.588495
Raph1	4.51591e-08	-0.308892	0.187	0.318	0.00080013	0.58805
Zfp385b	4.07625e-22	-0.850293	0.314	0.534	7.22229e-18	0.588015
Aig1	4.0727e-08	-0.333164	0.163	0.278	0.0007216	0.586331
Abhd2	1.95949e-09	-0.368309	0.14	0.24	3.47183e-05	0.583333
Gpm6a	2.94312e-32	-0.954505	0.361	0.619	5.21462e-28	0.583199
Xkr4	1.11785e-49	-1.12093	0.41	0.704	1.98061e-45	0.582386
Kcnj3	2.51755e-31	-0.80222	0.325	0.56	4.46059e-27	0.580357
Sptbn1	5.47535e-26	-0.889574	0.329	0.567	9.70123e-22	0.580247
Csrnp3	1.00694e-10	-0.411368	0.212	0.366	1.78409e-06	0.579235
Pdzrn3	2.34078e-08	-0.345373	0.128	0.222	0.000414739	0.576576
Car10	7.22657e-11	-0.759974	0.123	0.216	1.2804e-06	0.569444
Sgip1	2.59987e-12	-0.537749	0.264	0.464	4.60645e-08	0.568965
March1	3.83752e-35	-0.950524	0.343	0.604	6.79931e-31	0.567881
Nrcam	3.13853e-33	-0.86276	0.344	0.607	5.56084e-29	0.566721
Lmnb1	3.46381e-13	-0.481451	0.226	0.399	6.13718e-09	0.566416
Nrn1	2.9977e-10	-0.312944	0.138	0.244	5.31132e-06	0.565574
Rad18	8.55307e-07	-0.267075	0.129	0.23	0.0151543	0.560869
Unc13a	1.13133e-12	-0.390246	0.176	0.314	2.0045e-08	0.560509
Slc44a1	4.85799e-10	-0.441427	0.182	0.325	8.60738e-06	0.56
Reep1	3.46252e-07	-0.299939	0.126	0.227	0.00613489	0.555066
Cacna1b	2.42171e-16	-0.585449	0.253	0.456	4.29078e-12	0.554824
Cacna1d	4.56179e-15	-0.541987	0.228	0.411	8.08258e-11	0.554744
Ptn	3.36521e-18	-0.586532	0.189	0.341	5.96248e-14	0.554252
Enox2	8.66414e-22	-0.693523	0.227	0.41	1.53511e-17	0.553658
Nova2	4.32201e-14	-0.538029	0.219	0.398	7.65774e-10	0.550251
Nexmif	4.21949e-11	-0.306047	0.144	0.262	7.4761e-07	0.549618
Odf2	1.48076e-09	-0.289892	0.148	0.27	2.62361e-05	0.548148
Rai2	4.4013e-08	-0.251317	0.11	0.201	0.000779823	0.547263
Plxna2	1.56051e-09	-0.564048	0.177	0.324	2.76491e-05	0.546296
Adcy5	2.31391e-06	-0.30169	0.142	0.26	0.0409978	0.546154
G2e3	1.6762e-16	-0.516439	0.199	0.366	2.96989e-12	0.543716
Epb41l4a	3.56018e-05	-0.283029	0.1	0.184	0.630793	0.543478
Ptprj	1.18225e-08	-0.433429	0.132	0.244	0.000209472	0.540983
Cep192	1.13412e-10	-0.38512	0.173	0.32	2.00943e-06	0.540625
Dbn1	8.91166e-10	-0.273258	0.116	0.215	1.57897e-05	0.539535
Tmem178	5.91147e-13	-0.416854	0.165	0.306	1.04739e-08	0.539216
Nmnat2	2.61894e-10	-0.433447	0.173	0.321	4.64024e-06	0.538941
Adarb1	1.74567e-07	-0.276922	0.105	0.195	0.00309297	0.538461
Srgap1	1.92159e-06	-0.314466	0.112	0.209	0.0340468	0.535885
Schip1	3.30432e-21	-0.464094	0.17	0.32	5.8546e-17	0.53125
Plppr1	5.34937e-54	-1.2659	0.341	0.642	9.47801e-50	0.531153
Brinp1	5.4883e-10	-0.450625	0.131	0.247	9.72417e-06	0.530364
Nfic	4.46555e-10	-0.318566	0.133	0.251	7.91206e-06	0.52988
Bcl2l1	1.10153e-13	-0.332846	0.125	0.238	1.95169e-09	0.52521
Dscaml1	3.19803e-47	-1.15341	0.312	0.595	5.66626e-43	0.52437
Uncx	2.38808e-11	-0.357563	0.132	0.252	4.23121e-07	0.523809
Kcnc1	1.78953e-08	-0.279154	0.101	0.193	0.000317069	0.523316
Stxbp1	1.84037e-24	-0.500653	0.184	0.352	3.26077e-20	0.522727
Plppr3	5.70311e-05	-0.275549	0.095	0.182	1	0.521978
Sept3	7.15784e-14	-0.579641	0.205	0.393	1.26823e-09	0.521628
Srgap3	1.21733e-28	-0.855593	0.221	0.425	2.15686e-24	0.52
Slc8a3	1.40832e-07	-0.282012	0.087	0.168	0.00249525	0.517857
Stxbp5l	4.03651e-31	-0.9315	0.263	0.51	7.15188e-27	0.515686
Iqgap1	1.32651e-12	-0.349681	0.128	0.249	2.35031e-08	0.514056
Ankrd13a	1.63099e-08	-0.261918	0.095	0.185	0.000288979	0.513513
Ckap5	7.42038e-23	-0.760839	0.237	0.463	1.31474e-18	0.511879
Inpp4a	2.00445e-12	-0.306183	0.113	0.221	3.55148e-08	0.511312
Glce	2.63719e-11	-0.762102	0.214	0.419	4.67258e-07	0.51074
Grin2b	2.60926e-31	-1.13855	0.23	0.451	4.62309e-27	0.509978
Cep128	3.44496e-16	-0.604316	0.203	0.399	6.10378e-12	0.508772
Cadm2	2.53244e-43	-1.68669	0.292	0.574	4.48698e-39	0.508711
Kcnip4	4.69358e-17	-0.871304	0.12	0.238	8.31608e-13	0.504201
Plcl1	1.03779e-22	-0.840213	0.22	0.437	1.83876e-18	0.503432
Elmo1	6.11204e-31	-0.952461	0.224	0.447	1.08293e-26	0.501118
Mki67	6.96095e-46	-1.46492	0.269	0.537	1.23334e-41	0.500931
Usp29	1.10845e-23	-0.67304	0.209	0.418	1.96395e-19	0.5
Srrm3	3.48232e-27	-0.650122	0.206	0.412	6.16997e-23	0.5
Mgll	8.7553e-10	-0.325081	0.112	0.224	1.55126e-05	0.5
Tmem2	3.82748e-20	-0.665618	0.207	0.416	6.78153e-16	0.497596
Clspn	3.73496e-08	-0.298009	0.096	0.193	0.00066176	0.497409
Celf4	2.38861e-69	-1.43677	0.318	0.64	4.23214e-65	0.496875
Rims1	1.52171e-39	-1.03891	0.263	0.532	2.69617e-35	0.494361
Lrp1b	1.94967e-12	-1.16864	0.109	0.221	3.45442e-08	0.493212
Nrg1	1.86702e-32	-1.3701	0.247	0.501	3.30798e-28	0.493014
Rasgef1b	1.72419e-54	-1.30385	0.315	0.639	3.05492e-50	0.492958
Sort1	3.49611e-08	-0.3264	0.115	0.234	0.000619441	0.491453
Map3k12	6.61238e-10	-0.253266	0.077	0.157	1.17158e-05	0.490446
Kcnj6	1.17393e-33	-1.02659	0.253	0.518	2.07996e-29	0.488417
Camk4	1.72633e-07	-0.459238	0.08	0.164	0.0030587	0.487805
Brca1	1.81484e-08	-0.340936	0.106	0.218	0.000321554	0.486238
Kif5a	2.60407e-12	-0.422508	0.116	0.24	4.61389e-08	0.483333
Pgm2l1	2.28869e-07	-0.284066	0.089	0.185	0.0040551	0.481081
Kif24	3.67999e-10	-0.29279	0.095	0.198	6.52021e-06	0.479798
Efr3b	2.2104e-19	-0.480958	0.134	0.28	3.91639e-15	0.478571
March3	1.93283e-08	-0.414954	0.103	0.216	0.000342459	0.476852
Mapt	5.59478e-09	-0.481511	0.121	0.255	9.91282e-05	0.47451
Cadm3	6.53205e-20	-0.725943	0.171	0.361	1.15735e-15	0.473684
Myt1l	2.26174e-41	-1.02401	0.22	0.465	4.00736e-37	0.473118
Podxl2	1.19731e-15	-0.490192	0.131	0.277	2.1214e-11	0.472924
Lbr	1.25591e-10	-0.368837	0.121	0.256	2.22522e-06	0.472656
Nhlh2	8.64959e-12	-0.473024	0.129	0.273	1.53253e-07	0.472527
Bard1	1.03242e-09	-0.263217	0.075	0.159	1.82924e-05	0.471698
Smc4	6.92455e-21	-0.880485	0.21	0.446	1.22689e-16	0.470852
Adam23	7.92232e-12	-0.321846	0.088	0.187	1.40368e-07	0.470588
Syt9	8.00793e-08	-0.316651	0.075	0.16	0.00141885	0.46875
Syt1	1.74405e-16	-0.557691	0.095	0.203	3.0901e-12	0.46798
Slco3a1	4.34026e-13	-0.310891	0.079	0.169	7.69008e-09	0.467455
Rgs7	3.00445e-15	-0.542768	0.121	0.259	5.32329e-11	0.467181
Ncapg2	4.99731e-05	-0.38306	0.106	0.227	0.885424	0.46696
Cers6	4.69984e-12	-0.466316	0.121	0.26	8.32717e-08	0.465384
Ankrd44	3.17216e-34	-0.739959	0.215	0.462	5.62043e-30	0.465368
Ppm1h	4.22577e-17	-0.943492	0.175	0.377	7.48722e-13	0.464191
Pard6g	6.4764e-08	-0.264744	0.07	0.151	0.00114749	0.463576
Epb41l1	1.63617e-18	-0.719242	0.131	0.283	2.89896e-14	0.462897
Cd47	8.97948e-11	-0.252046	0.07	0.153	1.59098e-06	0.457516
Hunk	1.43967e-09	-0.366902	0.102	0.223	2.55081e-05	0.457399
Gm20696	5.41444e-27	-0.88063	0.211	0.462	9.59331e-23	0.45671
Sphkap	1.02718e-25	-0.79847	0.171	0.375	1.81996e-21	0.456
Gm26953	2.56723e-12	-0.394986	0.097	0.213	4.54861e-08	0.455399
Pag1	3.78684e-23	-0.595447	0.156	0.343	6.70953e-19	0.45481
Atp9a	1.88996e-11	-0.334216	0.08	0.176	3.34863e-07	0.454545
Cacna1e	7.66203e-24	-1.16547	0.147	0.324	1.35756e-19	0.453704
Map3k13	1.2156e-18	-0.614546	0.137	0.302	2.1538e-14	0.453642
Slc17a6	7.14607e-30	-0.779714	0.192	0.425	1.26614e-25	0.451765
Arl6ip1	4.5135e-16	-0.464438	0.106	0.235	7.99702e-12	0.451064
Slc24a3	2.21432e-12	-0.604312	0.107	0.239	3.92334e-08	0.447699
Ttbk1	3.94808e-18	-0.358078	0.092	0.206	6.99521e-14	0.446602
Lrrtm3	9.81732e-09	-0.564931	0.079	0.177	0.000173943	0.446327
Kntc1	1.95968e-13	-0.395167	0.095	0.213	3.47216e-09	0.446009
Lzts1	3.36566e-14	-0.467715	0.107	0.241	5.96328e-10	0.443983
Dlg2	1.03389e-23	-0.888206	0.157	0.354	1.83185e-19	0.443503
Sorbs2	6.65634e-09	-0.592544	0.09	0.203	0.000117937	0.44335
Scrt2	1.24571e-11	-0.392974	0.085	0.194	2.20715e-07	0.438144
Cacna1a	1.25757e-23	-0.958967	0.145	0.331	2.22817e-19	0.438066
Add3	4.85716e-09	-0.321083	0.066	0.151	8.60591e-05	0.437086
Ina	1.50039e-11	-0.356629	0.083	0.19	2.65839e-07	0.436842
Ccdc18	2.41063e-10	-0.346673	0.079	0.181	4.27116e-06	0.436464
Pcdha11	1.34087e-10	-0.457422	0.099	0.228	2.37576e-06	0.43421
St18	9.17522e-42	-1.15976	0.228	0.526	1.62566e-37	0.43346
Brip1	3.51995e-11	-0.361968	0.079	0.183	6.23666e-07	0.431694
Arpp21	6.21514e-32	-1.51713	0.191	0.443	1.1012e-27	0.431151
Ncapd2	4.15378e-20	-0.626251	0.144	0.334	7.35967e-16	0.431138
Gap43	2.48082e-28	-0.751259	0.151	0.351	4.39551e-24	0.430199
Ppp1r14c	8.7393e-27	-0.908004	0.176	0.41	1.54843e-22	0.429268
Celf3	5.33475e-13	-0.494044	0.104	0.243	9.45212e-09	0.427983
Herc3	4.32473e-14	-0.338579	0.072	0.169	7.66255e-10	0.426035
Tbc1d31	4.82805e-09	-0.269497	0.066	0.155	8.55434e-05	0.425806
Nhlh1	2.42235e-11	-0.378338	0.074	0.174	4.29193e-07	0.425287
Rad54b	7.37664e-14	-0.329935	0.076	0.179	1.30699e-09	0.424581
Kcnk10	2.04621e-12	-0.49067	0.091	0.215	3.62548e-08	0.423256
Snhg14	3.03299e-30	-0.945885	0.171	0.405	5.37384e-26	0.422222
Syn3	2.33627e-18	-0.880285	0.127	0.303	4.13941e-14	0.419142
Chd3	4.88407e-11	-0.327144	0.067	0.16	8.65359e-07	0.41875
Lrrc4c	1.48888e-12	-1.25337	0.089	0.214	2.638e-08	0.415888
Ppp2r2b	1.66869e-25	-1.06853	0.149	0.359	2.95659e-21	0.415042
Gm31409	9.57368e-11	-0.352378	0.073	0.176	1.69627e-06	0.414772
Tenm2	4.83911e-21	-0.683734	0.107	0.258	8.57394e-17	0.414729
Dpysl5	7.61557e-25	-0.66971	0.136	0.328	1.34933e-20	0.414634
Lingo1	1.52035e-06	-0.367983	0.068	0.164	0.0269376	0.414634
Mcf2l	6.06065e-16	-0.563852	0.099	0.239	1.07383e-11	0.414226
Dner	1.45123e-29	-1.00155	0.193	0.468	2.57129e-25	0.412393
Slc7a14	1.63344e-12	-0.32714	0.065	0.158	2.89413e-08	0.411392
Fxyd6	3.75052e-12	-0.422691	0.088	0.215	6.64517e-08	0.409302
E2f7	1.4032e-16	-0.432712	0.084	0.206	2.48619e-12	0.407767
Fstl5	4.13145e-10	-0.428427	0.077	0.189	7.3201e-06	0.407407
Grik1	6.60309e-11	-0.423862	0.061	0.15	1.16994e-06	0.406666
Syp	3.83249e-09	-0.331295	0.062	0.153	6.7904e-05	0.405228
Rundc3b	7.67158e-08	-0.353939	0.068	0.17	0.00135925	0.4
Prdm8	1.75427e-10	-0.347647	0.063	0.158	3.10821e-06	0.398734
Pclaf	5.11697e-10	-0.342001	0.064	0.161	9.06624e-06	0.397515
Gpr158	2.25018e-31	-0.911359	0.15	0.378	3.98687e-27	0.396825
Vash1	5.1843e-15	-0.371571	0.073	0.184	9.18555e-11	0.396739
Dtna	2.51807e-16	-0.610615	0.095	0.24	4.46152e-12	0.395833
Nrxn2	8.07802e-23	-0.656958	0.117	0.296	1.43126e-18	0.39527
St6galnac3	4.06071e-33	-0.844572	0.131	0.332	7.19477e-29	0.394578
Clvs1	2.32786e-53	-1.14035	0.206	0.524	4.12451e-49	0.39313
Diaph3	6.57162e-44	-1.19303	0.177	0.452	1.16436e-39	0.391593
Cntn2	6.60782e-62	-1.69382	0.214	0.548	1.17077e-57	0.390511
Myt1	1.36e-26	-0.903853	0.147	0.381	2.40965e-22	0.385827
Atp8a2	6.14643e-12	-0.423191	0.062	0.161	1.08902e-07	0.385093
Nxph1	8.57276e-19	-0.687984	0.073	0.191	1.51892e-14	0.382199
Hmgb2	5.02857e-12	-0.345534	0.063	0.165	8.90963e-08	0.381818
Arhgap33	7.38829e-14	-0.387622	0.074	0.195	1.30906e-09	0.379487
Bora	5.77101e-10	-0.403627	0.066	0.174	1.02251e-05	0.37931
L3mbtl4	1.90877e-22	-0.59658	0.08	0.211	3.38197e-18	0.379147
Rangap1	1.02699e-13	-0.42959	0.078	0.209	1.81962e-09	0.373206
Pdgfra	1.17696e-11	-0.461239	0.06	0.161	2.08533e-07	0.372671
Slc4a4	4.68461e-12	-0.781534	0.061	0.164	8.3002e-08	0.371951
Frmpd3	6.76805e-15	-0.550941	0.079	0.214	1.19916e-10	0.369159
Apba1	3.24193e-44	-1.08771	0.164	0.445	5.74405e-40	0.368539
Cenpp	8.42507e-31	-0.957664	0.141	0.383	1.49275e-26	0.368146
Polq	2.49307e-24	-0.522503	0.088	0.24	4.41722e-20	0.366667
Cacna1c	2.31135e-40	-1.61798	0.184	0.502	4.09525e-36	0.366534
Mir124a-1hg	1.65942e-29	-0.896199	0.126	0.344	2.94015e-25	0.366279
Kcnq2	1.52801e-27	-0.649213	0.104	0.284	2.70733e-23	0.366197
Dscam	2.16118e-30	-1.13492	0.12	0.33	3.82917e-26	0.363636
Spock1	7.53327e-22	-0.603198	0.056	0.155	1.33474e-17	0.36129
Dpysl3	1.13444e-16	-0.558974	0.075	0.208	2.01e-12	0.360577
Plk4	5.98328e-08	-0.339006	0.054	0.154	0.00106012	0.350649
Map6	3.51295e-16	-0.526232	0.074	0.214	6.22425e-12	0.345794
Hist1h1e	1.62842e-08	-0.378105	0.054	0.157	0.000288524	0.343949
Kcnk1	5.25948e-13	-0.406648	0.053	0.156	9.31876e-09	0.339743
Cenpf	7.77541e-34	-1.06532	0.107	0.315	1.37765e-29	0.339682
Cyfip2	3.68627e-13	-0.579169	0.067	0.199	6.53134e-09	0.336683
Cenpe	1.43163e-32	-1.05889	0.112	0.334	2.53655e-28	0.335329
Pid1	3.73909e-31	-1.02276	0.115	0.347	6.62492e-27	0.331412
Slc8a1	1.16003e-31	-0.927988	0.108	0.328	2.05534e-27	0.329268
Dgki	3.84802e-41	-0.966844	0.133	0.406	6.81792e-37	0.327586
Samd12	1.16287e-58	-1.68963	0.149	0.457	2.06037e-54	0.326039
Gm20125	2.2172e-19	-0.598167	0.069	0.212	3.92844e-15	0.325472
Stil	2.02684e-13	-0.387863	0.049	0.153	3.59115e-09	0.320261
Snap91	4.43599e-21	-0.633939	0.074	0.233	7.85969e-17	0.317596
Nrxn3	1.88012e-32	-1.44902	0.097	0.307	3.3312e-28	0.315961
Nfasc	1.52457e-29	-1.15101	0.095	0.301	2.70123e-25	0.315615
Prickle2	3.01075e-21	-0.839684	0.074	0.235	5.33445e-17	0.314893
Tspoap1	6.6544e-32	-0.752583	0.081	0.267	1.17903e-27	0.303371
Racgap1	3.44034e-17	-0.623378	0.071	0.235	6.09559e-13	0.302128
Stmn4	2.41359e-17	-0.489079	0.051	0.17	4.2764e-13	0.3
Ntrk2	2.12986e-26	-0.861616	0.073	0.244	3.77369e-22	0.29918
Kif20b	2.4034e-27	-0.893042	0.087	0.291	4.25834e-23	0.298969
Top2a	3.38832e-51	-1.53206	0.127	0.432	6.00342e-47	0.293981
Mapk4	7.64224e-22	-0.66566	0.062	0.211	1.35405e-17	0.293839
Phactr3	2.64447e-19	-0.484154	0.046	0.157	4.68547e-15	0.292993
Kif21b	6.82593e-29	-0.7874	0.078	0.269	1.20942e-24	0.289963
Pou2f2	9.70269e-22	-0.625223	0.061	0.211	1.71912e-17	0.289099
Efcab11	1.81783e-32	-0.776657	0.074	0.257	3.22083e-28	0.287938
Neurod1	2.8673e-50	-1.11277	0.098	0.344	5.08029e-46	0.284884
Kif18a	2.18378e-22	-0.615992	0.061	0.215	3.86922e-18	0.283721
Mmp24	2.05196e-29	-0.808214	0.074	0.264	3.63567e-25	0.280303
Hcn1	5.3055e-20	-0.645681	0.047	0.169	9.40028e-16	0.278106
Stmn2	3.93435e-40	-0.996918	0.092	0.331	6.97088e-36	0.277946
Unc5c	2.88154e-41	-1.5596	0.081	0.296	5.10551e-37	0.273649
Srcin1	2.26527e-19	-0.654265	0.052	0.193	4.0136e-15	0.26943
Ckap2	9.49331e-14	-0.472947	0.045	0.169	1.68203e-09	0.266272
Apc2	7.3153e-16	-0.55058	0.047	0.178	1.29612e-11	0.264045
Cit	8.06366e-35	-0.954152	0.081	0.309	1.42872e-30	0.262136
Lockd	5.20889e-28	-0.568014	0.051	0.195	9.22911e-24	0.261538
Nol4l	9.86189e-23	-0.585955	0.046	0.176	1.74733e-18	0.261363
Tacc3	1.32236e-21	-0.516104	0.046	0.177	2.34296e-17	0.259887
Aspm	2.67242e-38	-1.21493	0.078	0.307	4.735e-34	0.254072
Knl1	7.05291e-48	-1.14123	0.086	0.339	1.24964e-43	0.253687
Kif15	2.10683e-51	-1.18422	0.089	0.357	3.73288e-47	0.2493
Zmat4	4.63997e-19	-0.836882	0.042	0.17	8.22109e-15	0.247059
Ect2	2.23972e-26	-0.771792	0.056	0.235	3.96834e-22	0.238298
Tanc2	1.14134e-21	-0.633323	0.036	0.154	2.02222e-17	0.233766
Nyap2	5.63975e-43	-0.954061	0.064	0.277	9.99251e-39	0.231047
Incenp	6.87464e-35	-0.776067	0.057	0.249	1.21805e-30	0.228916
Arhgap11a	5.02042e-30	-0.503957	0.038	0.166	8.89519e-26	0.228916
Cntn1	7.56618e-25	-0.970016	0.046	0.208	1.34058e-20	0.221154
Neil3	9.01869e-36	-0.813438	0.052	0.237	1.59793e-31	0.219409
Ryr2	4.79883e-17	-1.05064	0.041	0.191	8.50257e-13	0.21466
Mis18bp1	3.15803e-30	-0.761822	0.046	0.217	5.59541e-26	0.211981
Kif11	4.18649e-49	-1.2543	0.07	0.336	7.41763e-45	0.208333
Ncapg	2.12222e-26	-0.631597	0.041	0.197	3.76015e-22	0.208122
Ttk	5.04748e-23	-0.532217	0.035	0.17	8.94313e-19	0.205882
Ndst3	2.89923e-38	-1.17609	0.056	0.275	5.13685e-34	0.203636
Anln	1.96925e-30	-0.786739	0.047	0.231	3.48912e-26	0.203463
Ckap2l	2.73596e-26	-0.557301	0.034	0.171	4.84757e-22	0.19883
Tpx2	3.53014e-36	-0.908261	0.05	0.254	6.2547e-32	0.19685
Ephb1	3.34214e-40	-1.53778	0.056	0.287	5.9216e-36	0.195122
Bub1	2.94577e-24	-0.604249	0.036	0.186	5.21931e-20	0.193548
Kif4	6.69108e-37	-0.915942	0.048	0.256	1.18553e-32	0.1875
Nusap1	6.44506e-28	-0.584579	0.032	0.172	1.14194e-23	0.186046
Ccnf	3.52549e-17	-0.544405	0.029	0.156	6.24646e-13	0.185897
Spag5	5.48171e-23	-0.518713	0.029	0.157	9.7125e-19	0.184713
Gabbr2	1.24148e-25	-0.933347	0.036	0.198	2.19965e-21	0.181818
Wscd2	3.18206e-29	-0.798364	0.032	0.188	5.63798e-25	0.170213
Bub1b	2.87067e-26	-0.591655	0.028	0.17	5.08625e-22	0.164706
Grm1	5.10898e-27	-0.980334	0.026	0.158	9.05209e-23	0.164557
Cdca2	2.89818e-36	-0.909506	0.039	0.241	5.135e-32	0.161826
Ndc80	5.92582e-27	-0.542629	0.025	0.157	1.04994e-22	0.159236
Prc1	7.53194e-36	-0.77308	0.032	0.201	1.33451e-31	0.159204
Kif23	9.92389e-32	-0.823287	0.033	0.215	1.75831e-27	0.153488
Kif18b	4.66997e-25	-0.5599	0.023	0.154	8.27425e-21	0.149351
Adamtsl3	1.17457e-35	-1.02801	0.031	0.214	2.0811e-31	0.14486
Hmmr	1.72675e-21	-0.602665	0.021	0.157	3.05945e-17	0.133758
Kif14	6.19863e-32	-0.675489	0.023	0.173	1.09827e-27	0.132948
Depdc1b	3.02147e-21	-0.599559	0.019	0.158	5.35344e-17	0.120253

## Sheet: cluster 4
gene	p_val	avg_log2FC	fraction + in cluster	fraction + not in cluster	p_val_adj	ratio + in:out of cluster
Obscn	4.02515e-08	0.713549	0.309	0.208	0.000713177	1.48558
Smoc1	2.32274e-22	0.998973	0.585	0.415	4.11542e-18	1.40964
Eln	1.20537e-06	0.658754	0.293	0.211	0.0213567	1.38862
Adamts17	0.00334326	0.523403	0.179	0.133	1	1.34586
Srebf1	0.000680068	0.547793	0.254	0.189	1	1.34391
Ablim2	0.00121253	0.471474	0.19	0.142	1	1.33803
Mcm6	0.00210907	0.493609	0.216	0.162	1	1.33333
Gli2	1.04697e-42	0.860019	0.763	0.575	1.85501e-38	1.32696
Cdh4	3.89676e-31	0.92203	0.696	0.534	6.90427e-27	1.30337
Fam210b	0.133452	0.422945	0.168	0.129	1	1.30232
Col18a1	0.000548565	0.411575	0.162	0.125	1	1.296
Aim2	0.00901483	0.448991	0.172	0.133	1	1.29323
Btbd11	3.19773e-41	0.808845	0.806	0.635	5.66573e-37	1.26929
Slc29a1	3.2551e-13	0.70804	0.472	0.372	5.76739e-09	1.26882
Mcm5	0.000458984	0.388341	0.164	0.131	1	1.25191
Boc	1.52175e-30	0.747755	0.792	0.633	2.69624e-26	1.25118
Sema7a	5.03162e-25	0.736167	0.625	0.501	8.91502e-21	1.2475
Prmt8	6.55454e-19	0.708573	0.563	0.456	1.16133e-14	1.23465
Whrn	7.37388e-08	0.533368	0.369	0.303	0.0013065	1.21782
Draxin	1.19076e-21	0.608299	0.71	0.586	2.10978e-17	1.2116
Cbfa2t3	2.11287e-33	0.71135	0.699	0.577	3.74358e-29	1.21144
Gsg1l	1.06503e-15	0.435476	0.839	0.699	1.88701e-11	1.20029
Ntng2	0.122778	0.429671	0.176	0.147	1	1.19728
Dtx1	0.536299	0.358246	0.176	0.148	1	1.18919
Tbata	0.0122189	0.443753	0.227	0.191	1	1.18848
Rftn1	9.67834e-18	0.628467	0.593	0.499	1.71481e-13	1.18838
Tmem163	2.31927e-26	0.82413	0.741	0.624	4.10929e-22	1.1875
Plekho2	0.0194636	0.327245	0.152	0.128	1	1.1875
Vsx2	0.925893	0.369127	0.171	0.145	1	1.17931
Rnf220	4.98644e-33	0.853025	0.809	0.689	8.83498e-29	1.17417
Tspan18	2.15078e-05	0.451938	0.244	0.208	0.381075	1.17308
Hells	2.10091e-05	0.465843	0.258	0.22	0.372239	1.17273
Cacng2	1.87262e-18	0.704078	0.738	0.63	3.31791e-14	1.17143
Gnl3	0.000773437	0.442838	0.275	0.236	1	1.16525
Ntrk3	2.47e-38	0.619986	0.931	0.8	4.37635e-34	1.16375
Dtl	0.00166992	0.438739	0.29	0.25	1	1.16
Grid2ip	0.0277589	0.476969	0.283	0.246	1	1.15041
Cux2	0.000250266	0.516831	0.371	0.324	1	1.14506
Pald1	0.0426364	0.384501	0.207	0.181	1	1.14365
Epb41l4b	0.0734828	0.434219	0.224	0.196	1	1.14286
C1ql1	0.00311899	0.336408	0.204	0.179	1	1.13966
Ptch1	2.39388e-20	0.430555	0.902	0.794	4.24147e-16	1.13602
Sfrp1	1.11582e-09	0.536043	0.531	0.468	1.97701e-05	1.13462
Ccnd2	3.75463e-14	0.571316	0.536	0.473	6.65245e-10	1.13319
Prkag2	0.00145359	0.461934	0.291	0.257	1	1.1323
Ncor2	4.00588e-33	0.520494	0.895	0.791	7.09762e-29	1.13148
Dock1	3.85326e-19	0.473881	0.726	0.642	6.8272e-15	1.13084
Cdk6	2.75758e-17	0.463941	0.874	0.779	4.88589e-13	1.12195
Ntn1	7.18829e-15	0.547821	0.746	0.665	1.27362e-10	1.1218
Islr2	0.185603	0.36417	0.205	0.183	1	1.12022
Tead2	0.020034	0.399576	0.254	0.227	1	1.11894
Mycn	0.0931077	0.380767	0.236	0.211	1	1.11848
Mdga1	2.40647e-13	0.507307	0.728	0.651	4.26379e-09	1.11828
Ccbe1	0.00199598	0.575219	0.352	0.315	1	1.11746
Barhl1	1.11253e-05	0.45291	0.432	0.387	0.197118	1.11628
Cadm1	1.21307e-19	0.439863	0.909	0.815	2.14932e-15	1.11534
Tnfaip8	0.000321619	0.462237	0.302	0.271	1	1.11439
Cdh20	6.79247e-18	0.468802	0.974	0.877	1.20349e-13	1.1106
Ust	0.000190093	0.464957	0.547	0.493	1	1.10953
Crmp1	1.21315e-05	0.523048	0.497	0.448	0.214946	1.10937
Man1c1	1.06068e-20	0.579464	0.84	0.758	1.87931e-16	1.10818
Gse1	4.61313e-36	0.743047	0.91	0.823	8.17354e-32	1.10571
Npm1	0.0231992	0.419323	0.291	0.264	1	1.10227
Rnd3	5.93314e-06	0.454181	0.422	0.383	0.105123	1.10183
Ccnd1	0.00253099	0.443852	0.402	0.365	1	1.10137
Ccdc88c	0.0338075	0.439616	0.308	0.28	1	1.1
Sdk1	1.70296e-08	0.545708	0.732	0.669	0.000301731	1.09417
Svil	0.0457636	0.399709	0.333	0.305	1	1.0918
Baz1a	1.62592e-05	0.413408	0.326	0.299	0.288081	1.0903
Utp20	0.224502	0.327764	0.194	0.178	1	1.08989
Abcc1	0.0587734	0.353199	0.234	0.215	1	1.08837
Miat	1.47598e-06	0.318671	0.777	0.716	0.0261514	1.0852
Shc2	0.435301	0.28565	0.158	0.146	1	1.08219
Ppp2r2c	8.89011e-13	0.470438	0.686	0.635	1.57515e-08	1.08031
Sept9	0.0279981	0.298844	0.176	0.163	1	1.07975
Adk	1.81036e-08	0.436945	0.498	0.462	0.000320759	1.07792
Foxp2	1.5814e-13	0.375528	0.873	0.81	2.80193e-09	1.07778
Tshz2	4.45723e-16	0.458619	0.817	0.759	7.89732e-12	1.07642
Lrig3	6.86554e-05	0.369791	0.524	0.488	1	1.07377
Kcnh5	0.124543	0.396162	0.309	0.289	1	1.0692
Sipa1l3	2.51933e-08	0.514539	0.722	0.676	0.000446374	1.06805
Hpca	0.00443826	0.331028	0.226	0.212	1	1.06604
Pvt1	0.0276828	0.397252	0.361	0.339	1	1.0649
Ssbp2	3.68621e-05	0.425147	0.593	0.558	0.653122	1.06272
Igdcc4	0.000437601	0.381535	0.425	0.4	1	1.0625
Adamts14	0.00168357	0.331392	0.278	0.262	1	1.06107
Tbc1d16	0.000424095	0.472894	0.548	0.517	1	1.05996
Pitpnm2	0.000284618	0.395117	0.322	0.304	1	1.05921
Alcam	0.0672174	0.402289	0.523	0.494	1	1.0587
Rassf4	6.09505e-07	0.411542	0.471	0.445	0.0107992	1.05843
Lrp5	0.109765	0.306902	0.208	0.197	1	1.05584
Gm11541	0.266376	0.304642	0.162	0.154	1	1.05195
Cecr2	2.14477e-13	0.417902	0.714	0.679	3.8001e-09	1.05155
Irs1	8.80832e-05	0.342049	0.535	0.51	1	1.04902
Tshz3	0.0303082	0.409212	0.321	0.307	1	1.0456
Gli1	0.217545	0.310266	0.274	0.263	1	1.04182
Rai1	9.06371e-14	0.429606	0.679	0.652	1.60591e-09	1.04141
Plekha6	0.00305299	0.370462	0.583	0.56	1	1.04107
Slc1a2	1.19663e-05	0.317112	0.642	0.617	0.212019	1.04052
Gpr153	0.141555	0.337772	0.257	0.247	1	1.04049
Map3k1	1.22587e-21	0.313243	0.97	0.934	2.17199e-17	1.03854
Cntnap1	0.277187	0.373632	0.362	0.349	1	1.03725
Pola1	3.75277e-06	0.345884	0.53	0.511	0.0664915	1.03718
Zeb1	6.86342e-26	0.363884	0.972	0.938	1.21606e-21	1.03625
Rps5	0.46839	0.276251	0.158	0.153	1	1.03268
Lig1	0.564677	0.308007	0.223	0.216	1	1.03241
Mir9-3hg	0.0133594	0.376449	0.465	0.451	1	1.03104
Akap6	2.44098e-11	0.296167	0.972	0.943	4.32493e-07	1.03075
Eef1a1	0.00354239	0.347235	0.377	0.366	1	1.03005
Ptch2	0.214592	0.318557	0.47	0.457	1	1.02845
Phf21b	0.174773	0.392422	0.429	0.418	1	1.02632
Hsp90ab1	1.05487e-10	0.406225	0.658	0.642	1.86902e-06	1.02492
Mcm7	0.655793	0.29864	0.215	0.21	1	1.02381
Mybbp1a	0.185899	0.256489	0.174	0.17	1	1.02353
Mthfd1	0.173044	0.25995	0.175	0.171	1	1.02339
Apba2	1.79099e-16	0.304705	0.877	0.857	3.17327e-12	1.02334
Gm47283	0.0107814	0.349061	0.539	0.527	1	1.02277
Angptl2	0.124116	0.271162	0.181	0.177	1	1.0226
Sacs	1.65904e-06	0.399116	0.498	0.487	0.029395	1.02259
Kcnh7	0.00011721	0.28297	0.803	0.787	1	1.02033
Nkd1	0.0093959	0.357918	0.406	0.398	1	1.0201
Rassf3	0.00271848	0.336825	0.564	0.553	1	1.01989
Smco4	0.449569	0.265961	0.17	0.167	1	1.01796
Nolc1	0.395391	0.253684	0.171	0.168	1	1.01786
Dcc	3.61827e-39	0.494483	0.998	0.981	6.41086e-35	1.01733
Tmem131	1.70202e-05	0.402053	0.597	0.587	0.301564	1.01704
Adgrg1	0.0107651	0.337927	0.359	0.353	1	1.017
Ivns1abp	0.00316077	0.346336	0.462	0.455	1	1.01538
Hs3st5	0.000552871	0.251668	0.796	0.784	1	1.01531
Tgfb2	0.000413153	0.369105	0.336	0.331	1	1.01511
Bcl7a	0.029084	0.368855	0.407	0.401	1	1.01496
Disp3	0.146781	0.326792	0.28	0.276	1	1.01449
Neo1	2.47027e-07	0.355177	0.648	0.64	0.00437683	1.0125
Thsd4	0.352431	0.333914	0.243	0.24	1	1.0125
Igf2bp3	0.472418	0.269284	0.166	0.164	1	1.01219
Osbp2	0.0351072	0.381881	0.418	0.413	1	1.01211
Nek6	0.0815467	0.282419	0.184	0.182	1	1.01099
Rcc2	0.187543	0.266491	0.188	0.186	1	1.01075
Rpsa	0.227327	0.282682	0.197	0.195	1	1.01026
Tom1l1	0.410624	0.303513	0.221	0.219	1	1.00913
Pard3	0.000136596	0.26339	0.69	0.684	1	1.00877
Hdac9	5.51915e-08	0.276798	0.697	0.692	0.000977883	1.00723
Pcgf5	0.678666	0.255993	0.159	0.158	1	1.00633
Cdkal1	3.8062e-06	0.336711	0.618	0.618	0.0674383	1
Zfp462	0.0158119	0.321194	0.543	0.543	1	1
Mvb12b	1.99014e-05	0.355075	0.542	0.542	0.352614	1
Eya4	0.467229	0.271103	0.361	0.361	1	1
Atm	0.0320091	0.315502	0.335	0.335	1	1
Nek7	0.477058	0.307418	0.314	0.314	1	1
Mb21d2	0.806392	0.332576	0.257	0.257	1	1
Rpl13a	0.0957629	0.290985	0.221	0.221	1	1
Syt13	0.317103	0.294755	0.177	0.177	1	0.999999
Malat1	1.34307e-68	-0.599459	0.999	1	2.37965e-64	0.999
Zfhx3	0.000538633	0.273401	0.625	0.626	1	0.998402
Ncl	8.81628e-07	0.32424	0.556	0.557	0.0156207	0.998204
Nedd4	3.59022e-05	0.265643	0.801	0.803	0.636114	0.997509
Nr3c2	0.535836	0.327481	0.371	0.372	1	0.997312
Dpysl4	0.751506	0.293727	0.26	0.261	1	0.996168
Ulk4	0.468372	0.277638	0.221	0.222	1	0.995495
Ipo5	0.973072	0.272966	0.209	0.21	1	0.995238
Ccm2	0.615434	0.284537	0.181	0.182	1	0.994505
Nxpe4	0.267489	0.339541	0.361	0.363	1	0.99449
Arid1b	6.14466e-09	0.256523	0.847	0.852	0.000108871	0.994131
Rpl4	0.274538	0.319315	0.286	0.288	1	0.993055
Elmsan1	0.00253038	0.315116	0.255	0.257	1	0.992218
Celf2	3.10988e-12	-0.403456	0.954	0.962	5.51009e-08	0.991684
Gtf3c1	0.0299362	0.351142	0.423	0.427	1	0.990632
Bcl11a	0.00778153	0.31437	0.42	0.424	1	0.990566
Unc80	0.50557	0.250774	0.195	0.197	1	0.989847
Kcnq1ot1	1.64984e-07	0.289039	0.741	0.749	0.00292319	0.989319
Slc39a11	0.00710522	0.340804	0.462	0.467	1	0.989293
Scd2	0.145395	0.253899	0.268	0.271	1	0.98893
Mdn1	0.0454635	0.307313	0.405	0.41	1	0.987805
Esyt1	0.179696	0.26012	0.162	0.164	1	0.987804
Cbfa2t2	1.30238e-06	0.323496	0.521	0.528	0.0230755	0.986742
St3gal4	0.23682	0.252886	0.2	0.203	1	0.985221
Msi1	0.923128	0.284427	0.258	0.262	1	0.984732
Alkbh1	0.488263	0.273499	0.233	0.237	1	0.983122
Tpcn1	0.0148622	0.300771	0.4	0.407	1	0.982801
Grik2	2.77207e-10	-0.334022	0.929	0.946	4.91155e-06	0.982029
Phf21a	2.00187e-09	0.290974	0.724	0.739	3.54692e-05	0.979702
Med12l	0.93111	0.256142	0.478	0.489	1	0.977505
Nap1l1	0.0543661	0.312574	0.344	0.352	1	0.977272
Mms22l	0.309244	0.303236	0.288	0.295	1	0.976271
Nfic	0.489236	0.280803	0.232	0.238	1	0.97479
Nasp	0.00202933	0.281433	0.459	0.471	1	0.974522
Nop58	0.421858	0.264621	0.295	0.303	1	0.973597
Dync2h1	0.00207335	0.29749	0.468	0.481	1	0.972973
Auts2	6.55852e-16	-0.370431	0.948	0.975	1.16204e-11	0.972308
Wdr43	3.93738e-05	0.286438	0.319	0.329	0.697626	0.969605
Gm20388	0.0165607	0.253952	0.568	0.586	1	0.969283
Chsy1	0.280651	0.264858	0.243	0.251	1	0.968127
Heg1	0.000143395	0.257849	0.606	0.626	1	0.968051
Nckap5l	0.691882	0.263157	0.253	0.262	1	0.965648
Dlgap3	0.144688	0.278995	0.307	0.318	1	0.965409
Gas5	0.10282	0.274849	0.251	0.26	1	0.965384
Xrcc5	0.200121	0.274742	0.25	0.259	1	0.965251
Gm26883	0.107642	0.291438	0.248	0.257	1	0.96498
Taf1d	7.04272e-05	0.273662	0.354	0.367	1	0.964577
Serbp1	8.39718e-05	0.301075	0.435	0.451	1	0.964523
Pak3	0.0193226	0.268968	0.59	0.612	1	0.964052
Uri1	0.55683	0.271161	0.294	0.305	1	0.963934
Nin	0.398612	0.297431	0.414	0.43	1	0.96279
Cxxc5	0.948249	0.300864	0.31	0.322	1	0.962733
Usp37	0.933878	0.287111	0.284	0.295	1	0.962712
Mcmbp	0.700789	0.276029	0.307	0.319	1	0.962382
Cog7	0.00617433	0.250354	0.459	0.477	1	0.962264
Rif1	0.34282	0.259971	0.432	0.449	1	0.962138
Bcar1	0.944488	0.287676	0.27	0.281	1	0.960854
Celsr2	0.482536	0.279364	0.39	0.406	1	0.960591
Wasf3	0.506794	0.307182	0.352	0.367	1	0.959128
Prim2	0.532008	0.277358	0.305	0.318	1	0.959119
Spats2	0.339137	0.307569	0.321	0.335	1	0.958209
Pde4dip	0.00123465	0.269715	0.605	0.632	1	0.957278
Smad3	0.685945	0.255819	0.246	0.257	1	0.957198
Znrf3	0.118763	0.262952	0.424	0.443	1	0.95711
Bbx	0.0284596	0.259528	0.481	0.503	1	0.956262
Pabpc1	0.453839	0.279663	0.279	0.292	1	0.955479
Exoc2	0.0127918	0.271951	0.466	0.488	1	0.954918
Eif3a	0.226759	0.274602	0.486	0.509	1	0.954813
H2afy	0.371558	0.271889	0.353	0.37	1	0.954054
Prmt3	0.906411	0.257964	0.225	0.236	1	0.953389
Homer2	0.293284	0.278526	0.245	0.257	1	0.953307
Eef2	0.329329	0.26053	0.342	0.359	1	0.952646
Rftn2	0.349867	0.26431	0.274	0.288	1	0.951389
Cyp7b1	0.199669	0.265063	0.245	0.258	1	0.949612
Cmtm4	0.706185	0.260071	0.282	0.297	1	0.949495
Ahdc1	0.553274	0.295603	0.462	0.487	1	0.948665
Mgll	0.341156	0.295786	0.201	0.212	1	0.948113
Cblb	0.830366	0.279313	0.506	0.534	1	0.947565
Spata5	0.35438	0.253636	0.341	0.361	1	0.944598
Tiam1	0.177464	0.284142	0.468	0.497	1	0.94165
Lrrc8d	0.500513	0.251532	0.327	0.352	1	0.928977
Ank2	1.41544e-15	-0.473787	0.835	0.906	2.50787e-11	0.921633
Lsamp	6.93779e-37	-0.76443	0.853	0.937	1.22924e-32	0.910352
Astn2	1.27932e-20	-0.514771	0.809	0.892	2.2667e-16	0.906951
Nrxn1	4.35062e-51	-0.737277	0.838	0.927	7.70844e-47	0.903991
Ctnna2	2.48034e-28	-0.556808	0.803	0.898	4.39467e-24	0.894209
Map2	3.65416e-09	-0.317222	0.76	0.852	6.47444e-05	0.892019
Erbb4	8.32368e-46	-0.875987	0.822	0.925	1.47479e-41	0.888649
Ccser1	8.17756e-21	-0.514452	0.782	0.891	1.4489e-16	0.877665
Frmd4b	0.0023927	-0.266355	0.655	0.747	1	0.876841
Nbea	2.25384e-09	-0.262735	0.75	0.859	3.99335e-05	0.873108
Pde4d	3.91144e-33	-0.795466	0.79	0.906	6.93029e-29	0.871965
Kcnb2	3.41377e-12	-0.484429	0.693	0.798	6.04853e-08	0.868421
Gria4	1.56963e-21	-0.623114	0.746	0.862	2.78107e-17	0.865429
Grid2	2.52034e-07	-0.344604	0.62	0.717	0.00446553	0.864714
Enox1	1.25197e-09	-0.297417	0.651	0.754	2.21823e-05	0.863395
Rbfox1	1.18871e-21	-0.738351	0.719	0.846	2.10616e-17	0.849882
Macf1	0.000256446	-0.251023	0.641	0.766	1	0.836815
Gria2	1.34225e-07	-0.267513	0.626	0.758	0.00237821	0.825857
Anks1b	2.97185e-15	-0.474113	0.612	0.747	5.26552e-11	0.819277
Dach1	3.8335e-08	-0.255805	0.592	0.724	0.00067922	0.817679
Map1b	0.00141492	-0.302607	0.545	0.673	1	0.809807
Edil3	2.59914e-08	-0.29976	0.531	0.663	0.000460516	0.800905
Mbp	0.122689	-0.292852	0.174	0.22	1	0.790909
Qk	3.80385e-05	-0.342193	0.499	0.631	0.673966	0.790808
Nedd4l	1.52591e-22	-0.586289	0.636	0.818	2.7036e-18	0.777506
Npas3	1.16837e-05	-0.357196	0.373	0.481	0.207011	0.775468
Clvs1	2.95977e-07	-0.268915	0.384	0.5	0.00524412	0.768
Dscaml1	2.11947e-12	-0.387169	0.443	0.578	3.75527e-08	0.766436
Negr1	2.97372e-10	-0.362902	0.516	0.674	5.26885e-06	0.765579
Msra	0.000231687	-0.266747	0.372	0.487	1	0.76386
Fgf13	1.02227e-11	-0.403866	0.455	0.6	1.81126e-07	0.758333
Adarb2	8.64803e-15	-0.513907	0.469	0.62	1.53226e-10	0.756451
Ptprk	5.78243e-06	-0.287152	0.423	0.564	0.102453	0.75
Xkr4	1.16272e-16	-0.571165	0.517	0.69	2.06011e-12	0.749275
Cask	1.37369e-13	-0.342036	0.486	0.65	2.4339e-09	0.747692
Cntnap2	4.56196e-13	-0.397408	0.459	0.614	8.08289e-09	0.747557
Dlgap1	5.61217e-14	-0.429276	0.462	0.619	9.94365e-10	0.746365
Tnik	1.31347e-36	-0.863066	0.571	0.767	2.32721e-32	0.744459
Zfp521	1.01061e-20	-0.692276	0.522	0.703	1.79061e-16	0.742532
Fry	7.93591e-09	-0.374277	0.462	0.623	0.000140608	0.741573
Sh3gl2	2.01277e-08	-0.312774	0.423	0.571	0.000356623	0.740805
Fyn	1.37195e-10	-0.297127	0.433	0.585	2.43083e-06	0.740171
Cacna2d3	1.22124e-06	-0.297223	0.298	0.404	0.021638	0.737624
Scmh1	5.07313e-08	-0.271694	0.444	0.603	0.000898858	0.736318
Phf20l1	6.81808e-07	-0.275404	0.431	0.587	0.0120803	0.734242
Nav3	2.82251e-28	-0.79023	0.574	0.782	5.00092e-24	0.734015
Pdlim3	0.000931106	-0.311161	0.274	0.374	1	0.73262
Plppr1	7.68922e-18	-0.675098	0.456	0.627	1.36238e-13	0.727273
Srgap2	1.45482e-19	-0.514543	0.521	0.718	2.57766e-15	0.725627
Sorbs1	1.93179e-13	-0.508432	0.452	0.623	3.42275e-09	0.725522
Psd3	1.35547e-13	-0.375855	0.471	0.653	2.40162e-09	0.721286
Plcb1	1.35154e-30	-0.775292	0.542	0.754	2.39467e-26	0.718833
Klhl29	7.66348e-20	-0.764113	0.455	0.633	1.35781e-15	0.718799
Rtn1	1.51237e-06	-0.264919	0.385	0.539	0.0267962	0.714286
Macrod2	2.25514e-19	-0.54022	0.521	0.73	3.99566e-15	0.713699
Zfpm2	2.32468e-34	-1.22634	0.513	0.723	4.11887e-30	0.709543
Col4a1	0.000695054	-0.305515	0.141	0.199	1	0.708542
Zfp608	5.53079e-11	-0.332649	0.454	0.641	9.79946e-07	0.708268
Gm20696	1.26537e-07	-0.301891	0.315	0.449	0.00224199	0.701559
Sema6a	2.71223e-24	-0.780644	0.484	0.692	4.80554e-20	0.699422
Gm4258	1.22385e-10	-0.436312	0.427	0.612	2.16842e-06	0.697712
Nova1	4.62416e-11	-0.319109	0.371	0.537	8.19309e-07	0.690875
Enox2	2.15557e-05	-0.262821	0.277	0.404	0.381924	0.685643
Pde4b	2.66648e-14	-0.558083	0.373	0.546	4.72447e-10	0.68315
Celf4	2.70469e-27	-0.957835	0.426	0.625	4.79217e-23	0.6816
Pik3r3	4.58576e-07	-0.286206	0.309	0.454	0.00812505	0.680617
Pax6	2.24332e-10	-0.264186	0.323	0.475	3.97471e-06	0.68
Ppfia2	2.49799e-21	-0.659644	0.453	0.668	4.42593e-17	0.678144
Apbb2	1.34931e-07	-0.268489	0.214	0.316	0.00239071	0.677215
Sipa1l2	5.13475e-11	-0.253136	0.262	0.387	9.09774e-07	0.677002
Kcnj3	2.20135e-13	-0.497606	0.374	0.553	3.90036e-09	0.676311
Nrcam	1.39154e-16	-0.547561	0.405	0.599	2.46553e-12	0.676127
Fat3	2.16669e-08	-0.371824	0.278	0.413	0.000383893	0.673123
Slc1a3	1.08455e-06	-0.32225	0.268	0.399	0.019216	0.671679
Adgrl3	8.70223e-31	-0.716638	0.47	0.703	1.54186e-26	0.668563
Ralyl	4.21575e-09	-0.341862	0.227	0.342	7.46946e-05	0.663742
Il1rapl1	2.49348e-09	-0.466521	0.323	0.487	4.41794e-05	0.663244
Otud7a	2.35926e-08	-0.305687	0.278	0.42	0.000418013	0.661905
Lama2	8.0505e-06	-0.292801	0.173	0.262	0.142639	0.660305
Gtdc1	2.24122e-10	-0.355693	0.377	0.571	3.971e-06	0.660245
Sptan1	2.69612e-12	-0.312525	0.31	0.473	4.77699e-08	0.655391
Gpm6a	1.60212e-26	-0.679384	0.402	0.614	2.83864e-22	0.654723
Dscam	4.95202e-15	-0.512149	0.208	0.318	8.77399e-11	0.654088
Zfp385b	1.16574e-13	-0.596752	0.346	0.529	2.06546e-09	0.654064
Myt1l	4.83941e-10	-0.476399	0.297	0.455	8.57448e-06	0.652747
Lhfpl3	1.05778e-08	-0.961213	0.109	0.167	0.000187417	0.652694
Fosb	2.30449e-06	-0.298992	0.204	0.313	0.040831	0.651757
Mtss1	4.70132e-21	-0.662328	0.393	0.605	8.32979e-17	0.649587
Kcnq3	3.05218e-09	-0.286599	0.269	0.416	5.40786e-05	0.646634
Cdk5rap2	5.22676e-12	-0.397308	0.329	0.509	9.26078e-08	0.646365
Nhsl1	1.65388e-07	-0.250968	0.24	0.376	0.00293034	0.638298
Pclo	3.06504e-12	-0.42366	0.305	0.478	5.43064e-08	0.638075
Rps6ka3	4.70147e-16	-0.369703	0.264	0.414	8.33006e-12	0.637681
Stxbp1	2.50705e-07	-0.25372	0.221	0.347	0.00444198	0.636887
Dock9	0.000998363	-0.311846	0.103	0.162	1	0.635802
Mki67	1.15208e-21	-1.08149	0.334	0.528	2.04126e-17	0.632576
Gab1	1.21165e-11	-0.329771	0.275	0.437	2.1468e-07	0.62929
Rims1	1.2049e-14	-0.636386	0.329	0.523	2.13484e-10	0.629063
March1	2.42658e-30	-0.731284	0.377	0.6	4.29942e-26	0.628333
Gpr158	1.01246e-12	-0.385532	0.231	0.368	1.79388e-08	0.627717
Gm3764	2.40432e-09	-0.302289	0.203	0.324	4.25998e-05	0.626543
Dock10	1.3673e-10	-0.329211	0.174	0.278	2.42258e-06	0.625899
Usp29	1.51722e-18	-0.331593	0.257	0.411	2.68822e-14	0.625304
Scaper	1.81953e-18	-0.293706	0.261	0.418	3.22384e-14	0.624402
Pcdh7	1.7154e-16	-0.47016	0.245	0.394	3.03934e-12	0.621827
Kcnip4	5.3825e-09	-0.473841	0.146	0.235	9.53671e-05	0.621276
Pkia	2.41866e-10	-0.26507	0.236	0.38	4.28538e-06	0.621052
Rad21	5.72626e-11	-0.308023	0.239	0.385	1.01458e-06	0.620779
Dner	7.14489e-12	-0.492224	0.281	0.456	1.26593e-07	0.616228
Sh3kbp1	2.93442e-08	-0.267861	0.231	0.375	0.00051992	0.616
Prkce	2.82452e-14	-0.475842	0.298	0.487	5.00449e-10	0.61191
Cep128	1.90191e-09	-0.317869	0.241	0.394	3.3698e-05	0.611675
Brd8	1.76095e-12	-0.326882	0.266	0.435	3.12006e-08	0.611494
Csrnp3	1.38345e-10	-0.282978	0.222	0.365	2.45119e-06	0.608219
Gpcpd1	2.79811e-07	-0.360574	0.167	0.275	0.00495769	0.607273
Park2	2.28042e-17	-0.34765	0.235	0.388	4.04044e-13	0.60567
Stxbp5l	7.49089e-19	-0.686364	0.305	0.504	1.32724e-14	0.605159
Fnbp1	7.79374e-14	-0.319587	0.192	0.318	1.38089e-09	0.603773
Ankrd44	7.40657e-09	-0.384794	0.274	0.454	0.00013123	0.603524
Nkain3	3.77479e-21	-0.632021	0.356	0.59	6.68817e-17	0.60339
Pkp4	3.19029e-16	-0.486967	0.282	0.468	5.65256e-12	0.602564
Utrn	1.38854e-07	-0.459505	0.218	0.362	0.00246022	0.60221
Zc3h7a	7.6205e-11	-0.255553	0.211	0.351	1.3502e-06	0.601139
Pcdh9	2.53566e-19	-1.28075	0.302	0.507	4.49268e-15	0.595661
Stard13	7.46451e-05	-0.326678	0.094	0.158	1	0.594936
Glce	1.06745e-16	-0.555612	0.245	0.414	1.8913e-12	0.591787
Tmem2	1.014e-13	-0.41069	0.243	0.411	1.7966e-09	0.591241
L3mbtl4	8.68079e-07	-0.258027	0.121	0.205	0.0153806	0.590244
Cadps2	1.83446e-27	-1.02421	0.282	0.478	3.2503e-23	0.589958
Ror1	2.06664e-08	-0.531437	0.24	0.408	0.000366168	0.588235
Egfr	3.77334e-19	-0.64713	0.299	0.514	6.68561e-15	0.581712
Cenpc1	9.65701e-10	-0.272157	0.188	0.324	1.71103e-05	0.580247
Atxn1	2.34419e-18	-0.413542	0.207	0.357	4.15344e-14	0.579832
Kcnq5	2.38244e-24	-1.12944	0.316	0.545	4.22121e-20	0.579816
Mical3	3.21987e-10	-0.295083	0.178	0.307	5.70496e-06	0.579804
Nrg1	5.14609e-22	-1.0897	0.286	0.495	9.11785e-18	0.577778
Nrep	3.0464e-07	-0.283776	0.162	0.281	0.00539761	0.576512
Pcdh11x	5.19487e-07	-0.254852	0.098	0.17	0.00920427	0.57647
Cntn2	2.04043e-38	-1.19998	0.308	0.535	3.61524e-34	0.575701
Myo10	9.31715e-14	-0.468608	0.225	0.391	1.65081e-09	0.575447
Rgs7	3.00621e-10	-0.316193	0.147	0.256	5.3264e-06	0.574219
Mctp1	2.26195e-05	-0.278977	0.109	0.19	0.400771	0.573684
Myt1	5.80289e-13	-0.525452	0.213	0.372	1.02816e-08	0.57258
Slc44a1	9.55657e-12	-0.326675	0.186	0.325	1.69323e-07	0.572308
Cers6	0.000125564	-0.258027	0.147	0.257	1	0.571984
Hivep2	1.24661e-17	-0.64185	0.306	0.536	2.20874e-13	0.570895
Hs6st3	1.63067e-17	-0.886257	0.282	0.494	2.88923e-13	0.57085
Rapgef4	2.37565e-11	-0.310709	0.105	0.184	4.20918e-07	0.570652
Efr3b	4.43909e-10	-0.286218	0.158	0.277	7.86517e-06	0.570397
Susd6	4.67257e-08	-0.273668	0.154	0.27	0.000827885	0.57037
Ubash3b	6.25797e-13	-0.399011	0.192	0.337	1.10879e-08	0.569733
Nrxn2	2.52995e-12	-0.350092	0.165	0.29	4.48256e-08	0.568965
Celf3	2.76104e-11	-0.284099	0.135	0.239	4.89202e-07	0.564853
Ptprj	6.35598e-11	-0.37395	0.137	0.244	1.12615e-06	0.561475
Sgcd	5.73955e-17	-0.786122	0.25	0.447	1.01693e-12	0.559284
Mast4	7.14093e-07	-0.440323	0.085	0.152	0.0126523	0.55921
Trpm3	2.94447e-09	-0.903984	0.128	0.23	5.21701e-05	0.556521
Cenpp	1.42618e-15	-0.510827	0.208	0.374	2.52691e-11	0.55615
Synpr	2.10008e-14	-0.562077	0.2	0.362	3.72092e-10	0.552486
Sema6d	4.66042e-25	-0.746073	0.267	0.484	8.25733e-21	0.551653
Smc4	3.71921e-19	-0.646699	0.241	0.442	6.58969e-15	0.545249
Lrp1	5.55318e-14	-0.388308	0.121	0.222	9.83913e-10	0.545045
Hivep3	9.73938e-20	-0.841846	0.225	0.416	1.72562e-15	0.540865
Mdga2	6.70509e-22	-0.745191	0.199	0.368	1.18801e-17	0.540761
Opcml	5.49481e-25	-1.38575	0.259	0.479	9.73571e-21	0.54071
Frmpd3	7.96372e-06	-0.279884	0.113	0.209	0.141101	0.54067
Diaph3	4.10964e-27	-0.753674	0.239	0.444	7.28146e-23	0.538288
Cacna1c	1.73704e-23	-1.0889	0.264	0.491	3.07768e-19	0.537678
Pag1	4.82413e-17	-0.404807	0.182	0.339	8.5474e-13	0.536873
Ano4	5.89733e-17	-0.382042	0.131	0.246	1.04489e-12	0.53252
St18	5.71691e-31	-0.892159	0.276	0.519	1.01292e-26	0.531792
Tmtc2	5.83379e-45	-1.04572	0.327	0.616	1.03363e-40	0.530844
Brinp1	1.36486e-09	-0.398263	0.131	0.247	2.41826e-05	0.530364
Fam13c	1.10665e-11	-0.25463	0.105	0.198	1.96076e-07	0.530303
Sphkap	5.995e-18	-0.560377	0.197	0.372	1.06219e-13	0.52957
Lzts1	1.93822e-12	-0.304133	0.126	0.238	3.43414e-08	0.529412
Dlg2	6.56304e-22	-0.692321	0.185	0.35	1.16284e-17	0.528571
Ptprm	2.92848e-13	-0.747063	0.129	0.245	5.18868e-09	0.52653
Fgf14	6.2717e-12	-1.25449	0.185	0.352	1.11122e-07	0.525568
Sptbn1	2.74381e-39	-0.941188	0.3	0.571	4.86148e-35	0.525394
Mir124a-1hg	3.35379e-19	-0.564593	0.177	0.337	5.94225e-15	0.525222
Ncapd2	1.45451e-17	-0.431491	0.172	0.33	2.5771e-13	0.521212
Stmn2	8.97525e-17	-0.455863	0.167	0.321	1.59024e-12	0.520249
Spock1	1.22638e-08	-0.396414	0.079	0.152	0.00021729	0.519737
Phactr3	1.26697e-07	-0.255079	0.079	0.152	0.00224481	0.519737
Srgap3	2.93218e-25	-0.77869	0.22	0.424	5.19524e-21	0.518868
Apba1	5.03039e-18	-0.690956	0.226	0.437	8.91285e-14	0.517162
Pid1	6.14143e-21	-0.52228	0.175	0.339	1.08814e-16	0.516224
Cacnb4	4.07103e-14	-0.42706	0.133	0.259	7.21305e-10	0.513513
Cpeb4	3.96181e-14	-0.277174	0.125	0.244	7.01953e-10	0.512295
Zfp804a	1.03509e-18	-0.352963	0.127	0.249	1.83398e-14	0.51004
Snhg14	1.56517e-25	-0.682964	0.204	0.401	2.77317e-21	0.508728
Prkg1	3.33359e-09	-0.710888	0.091	0.179	5.90645e-05	0.50838
Cadm3	1.81872e-20	-0.590797	0.183	0.36	3.22241e-16	0.508333
Nxph1	0.000482424	-0.467529	0.095	0.188	1	0.505319
Prkca	1.27718e-08	-0.386237	0.111	0.22	0.000226291	0.504545
Ckap5	1.97254e-26	-0.726118	0.232	0.463	3.49495e-22	0.50108
Map3k13	7.56796e-12	-0.453778	0.15	0.3	1.34089e-07	0.5
Odf2	9.41756e-11	-0.313854	0.135	0.271	1.6686e-06	0.498155
Nol4l	9.48019e-08	-0.289467	0.085	0.171	0.0016797	0.497076
Plcl1	1.2345e-20	-0.802323	0.216	0.437	2.18729e-16	0.494279
Camk2d	6.00313e-21	-0.693356	0.208	0.422	1.06364e-16	0.492891
St6galnac3	4.75391e-12	-0.611753	0.161	0.328	8.42298e-08	0.490854
Sorbs2	3.40846e-11	-0.494215	0.099	0.202	6.0391e-07	0.490099
Ppp2r2b	1.88452e-22	-0.873881	0.172	0.356	3.339e-18	0.483146
Sort1	4.98339e-18	-0.304258	0.113	0.234	8.82957e-14	0.482906
Arhgap33	7.68464e-13	-0.261419	0.092	0.192	1.36156e-08	0.479166
Ppp1r14c	5.81843e-20	-0.759755	0.194	0.407	1.03091e-15	0.476658
Epb41l1	4.49181e-13	-0.612246	0.134	0.283	7.95859e-09	0.473498
Mtss1l	7.21499e-12	-0.254807	0.077	0.163	1.27835e-07	0.472392
Slc8a1	3.05412e-20	-0.582516	0.152	0.322	5.41129e-16	0.47205
G2e3	1.56861e-19	-0.604559	0.174	0.369	2.77927e-15	0.471545
Gm20125	4.47387e-10	-0.335175	0.098	0.208	7.92681e-06	0.471154
Plxdc2	1.06126e-11	-0.551494	0.088	0.187	1.88034e-07	0.470588
Rasa3	3.34964e-10	-0.290468	0.093	0.198	5.93489e-06	0.469697
Cadm2	7.18632e-49	-1.77553	0.27	0.576	1.27327e-44	0.46875
March3	2.30776e-11	-0.385808	0.101	0.216	4.0889e-07	0.467592
Gap43	4.60896e-15	-0.633787	0.163	0.349	8.16615e-11	0.467049
Itm2b	3.53587e-14	-0.285953	0.097	0.208	6.26486e-10	0.466346
Csmd2	1.28963e-16	-0.589252	0.117	0.251	2.28497e-12	0.466135
Tenm1	1.66067e-15	-0.590773	0.109	0.235	2.94237e-11	0.46383
Arhgap26	2.60326e-10	-0.438569	0.095	0.205	4.61245e-06	0.463414
Fos	2.23538e-10	-0.335034	0.075	0.162	3.96064e-06	0.462963
Arpp21	2.15432e-34	-1.41114	0.204	0.441	3.81702e-30	0.462585
Itga9	1.07917e-11	-0.394924	0.075	0.163	1.91207e-07	0.460122
Acer3	3.75717e-10	-0.328433	0.085	0.186	6.65696e-06	0.456989
Slc24a3	6.54926e-13	-0.536824	0.107	0.239	1.1604e-08	0.447699
Angpt1	2.50546e-11	-0.33298	0.07	0.159	4.43918e-07	0.440251
Pou2f2	6.97818e-12	-0.379314	0.091	0.207	1.23639e-07	0.439613
Car10	2.78928e-13	-1.0977	0.096	0.219	4.94205e-09	0.438356
Nfasc	8.63794e-21	-0.885353	0.129	0.296	1.53047e-16	0.435811
Rangap1	2.62215e-13	-0.315934	0.09	0.207	4.64593e-09	0.434782
Gm31409	4.69355e-11	-0.305284	0.076	0.175	8.31603e-07	0.434285
Asic2	2.78943e-13	-0.788236	0.072	0.166	4.94231e-09	0.433735
Mapt	2.72297e-14	-0.484363	0.111	0.256	4.82456e-10	0.433594
Cacna1e	1.08924e-29	-1.16897	0.14	0.324	1.92992e-25	0.432099
Syt9	1.71493e-09	-0.331363	0.069	0.16	3.03851e-05	0.43125
Atp8a2	5.946e-08	-0.325556	0.069	0.16	0.00105351	0.43125
Ppm1h	3.23372e-25	-0.964935	0.162	0.378	5.72951e-21	0.428571
Kcnd3	1.8126e-11	-0.400721	0.065	0.152	3.21156e-07	0.427631
Kcnk1	5.4872e-12	-0.297123	0.066	0.155	9.72222e-08	0.425806
Mapk4	5.40165e-13	-0.45322	0.087	0.207	9.57065e-09	0.42029
Mmp24	5.75882e-19	-0.563766	0.108	0.259	1.02035e-14	0.416988
Cenpe	5.74666e-22	-0.859744	0.138	0.331	1.01819e-17	0.416918
Arl6ip1	4.9034e-19	-0.464735	0.098	0.236	8.68784e-15	0.415254
Apc2	8.18317e-18	-0.37815	0.072	0.174	1.44989e-13	0.413793
Chd3	4.27147e-14	-0.307787	0.066	0.16	7.56819e-10	0.4125
Syn3	5.20507e-26	-0.834623	0.124	0.303	9.22235e-22	0.409241
Lrp8	2.93607e-14	-0.452728	0.07	0.172	5.20213e-10	0.406977
Snap91	5.5097e-21	-0.474095	0.093	0.231	9.76209e-17	0.402597
Ptn	2.21663e-19	-0.84822	0.139	0.348	3.92742e-15	0.399425
Cenpf	8.39231e-26	-0.875912	0.125	0.313	1.48695e-21	0.399361
Tenm2	2.17399e-25	-0.696105	0.103	0.259	3.85188e-21	0.397683
Disc1	8.76945e-12	-0.376391	0.068	0.171	1.55377e-07	0.397661
Racgap1	1.17102e-13	-0.448281	0.092	0.232	2.07482e-09	0.396552
Samd12	8.33205e-37	-1.43057	0.178	0.453	1.47627e-32	0.392936
Neurod1	4.73701e-34	-0.877303	0.131	0.34	8.39304e-30	0.385294
Csgalnact1	5.53526e-14	-0.395242	0.06	0.156	9.80738e-10	0.384615
Cyfip2	1.07699e-17	-0.515061	0.076	0.198	1.90821e-13	0.383838
Kcnd2	1.73088e-25	-1.56111	0.107	0.279	3.06677e-21	0.383512
Syne1	1.10902e-26	-0.994585	0.11	0.288	1.96496e-22	0.381944
Efcab11	7.81893e-17	-0.56114	0.097	0.254	1.38536e-12	0.38189
Cit	1.03024e-21	-0.689342	0.116	0.304	1.82538e-17	0.381579
Srgap1	2.7748e-22	-0.522659	0.081	0.213	4.9164e-18	0.380282
Top2a	7.16525e-52	-1.30152	0.16	0.428	1.26954e-47	0.373832
Unc5d	1.35052e-16	-0.853694	0.087	0.234	2.39285e-12	0.371795
Prdm8	8.16775e-13	-0.332167	0.059	0.159	1.44716e-08	0.371069
Nyap2	1.12868e-25	-0.667716	0.098	0.272	1.99979e-21	0.360294
Pdzrn3	7.98776e-20	-0.650548	0.082	0.228	1.41527e-15	0.359649
Elmo1	2.59742e-52	-1.24741	0.163	0.455	4.60212e-48	0.358242
Kif15	1.05907e-35	-0.940461	0.124	0.352	1.87647e-31	0.352273
Srcin1	1.34406e-20	-0.504399	0.067	0.191	2.38141e-16	0.350785
Hist1h1e	1.42323e-16	-0.379298	0.055	0.157	2.52168e-12	0.350318
Grin2b	8.91005e-46	-1.54676	0.159	0.46	1.57868e-41	0.345652
Chrm3	5.86776e-15	-0.603197	0.059	0.172	1.03965e-10	0.343023
Lockd	4.51553e-18	-0.441616	0.066	0.193	8.00062e-14	0.341969
Kif20b	8.53512e-23	-0.767218	0.099	0.29	1.51225e-18	0.341379
Creb5	2.15051e-18	-0.466756	0.06	0.176	3.81027e-14	0.340909
Kirrel3	3.87083e-14	-1.31017	0.057	0.17	6.85833e-10	0.335294
Cacna1a	5.35203e-36	-1.12795	0.112	0.335	9.48273e-32	0.334328
Bora	2.98353e-17	-0.423647	0.058	0.175	5.28622e-13	0.331428
Syt1	1.23209e-16	-0.740004	0.068	0.206	2.18301e-12	0.330097
Knl1	1.38643e-33	-0.943424	0.11	0.336	2.45648e-29	0.327381
Prickle2	2.23556e-26	-0.762476	0.076	0.235	3.96096e-22	0.323404
Ncam2	2.19695e-19	-0.91346	0.067	0.214	3.89255e-15	0.313084
Dpysl3	2.63598e-14	-0.580789	0.065	0.209	4.67042e-10	0.311005
Camk4	7.59708e-15	-0.653269	0.051	0.167	1.34605e-10	0.305389
Ckap2	6.06128e-12	-0.415896	0.051	0.168	1.07394e-07	0.303571
Ntrk2	2.11964e-27	-0.799367	0.074	0.244	3.75558e-23	0.303279
Hcn1	1.15733e-20	-0.559063	0.051	0.169	2.05055e-16	0.301775
Incenp	9.45943e-26	-0.64491	0.074	0.247	1.67602e-21	0.299595
Lrp1b	2.38322e-27	-1.44401	0.068	0.227	4.22258e-23	0.299559
Add3	2.07135e-20	-0.418745	0.046	0.154	3.67001e-16	0.298701
Slc4a4	3.34507e-23	-0.878661	0.049	0.165	5.92679e-19	0.29697
Arhgap11a	4.11675e-12	-0.42525	0.049	0.165	7.29406e-08	0.29697
Neil3	5.30951e-24	-0.698407	0.068	0.235	9.40738e-20	0.289362
Aspm	1.00509e-30	-1.12458	0.088	0.305	1.78082e-26	0.288524
Dtna	2.36019e-26	-0.72853	0.07	0.243	4.18178e-22	0.288066
Ncapg	3.34705e-20	-0.519009	0.056	0.195	5.9303e-16	0.287179
Tacc3	3.10759e-18	-0.460984	0.05	0.176	5.50603e-14	0.284091
Plxna2	3.54609e-46	-1.10165	0.095	0.335	6.28297e-42	0.283582
Lrrtm3	2.47246e-20	-0.796778	0.051	0.181	4.3807e-16	0.281768
Cntnap4	2.18284e-26	-0.782619	0.063	0.224	3.86755e-22	0.28125
Nrxn3	4.41923e-43	-1.76062	0.084	0.308	7.83e-39	0.272727
Ttk	8.18652e-22	-0.4595	0.046	0.169	1.45049e-17	0.272189
Luzp2	5.96394e-29	-1.09298	0.068	0.254	1.05669e-24	0.267716
Ect2	9.01854e-29	-0.708041	0.061	0.234	1.5979e-24	0.260684
Zmat4	4.80081e-22	-0.783626	0.044	0.169	8.50608e-18	0.260355
Wscd2	2.75093e-26	-0.650376	0.048	0.185	4.87409e-22	0.259459
Anln	3.94605e-26	-0.663133	0.059	0.229	6.99161e-22	0.257642
Tanc2	1.3991e-23	-0.599664	0.039	0.153	2.47893e-19	0.254902
Unc5c	4.64594e-39	-1.64758	0.075	0.296	8.23168e-35	0.253378
Lrrc4c	1.89131e-27	-1.48552	0.055	0.219	3.35102e-23	0.251141
Kif18a	2.39516e-28	-0.639554	0.053	0.216	4.24374e-24	0.24537
Kif11	5.32469e-40	-1.13552	0.082	0.335	9.43429e-36	0.244776
Bub1	1.13045e-21	-0.52113	0.045	0.184	2.00293e-17	0.244565
Kif4	2.40875e-37	-0.806472	0.06	0.255	4.26783e-33	0.235294
Ndst3	9.93732e-36	-1.10991	0.063	0.274	1.76069e-31	0.229927
Ckap2l	5.00632e-24	-0.500037	0.039	0.17	8.8702e-20	0.229412
Tpx2	1.19834e-32	-0.833532	0.057	0.253	2.12322e-28	0.225296
Ndc80	7.14112e-20	-0.459199	0.035	0.156	1.26526e-15	0.224359
Ryr2	1.52209e-28	-0.990593	0.041	0.191	2.69685e-24	0.21466
Cdca2	1.13913e-30	-0.833187	0.051	0.239	2.01831e-26	0.213389
Bub1b	3.97353e-25	-0.529553	0.036	0.169	7.0403e-21	0.213018
Kif18b	6.34197e-24	-0.485492	0.032	0.153	1.12367e-19	0.20915
Ephb1	2.29188e-44	-1.49879	0.059	0.286	4.06075e-40	0.206294
Spag5	9.89288e-23	-0.482302	0.032	0.156	1.75282e-18	0.205128
Kif23	3.27056e-34	-0.755363	0.042	0.214	5.79478e-30	0.196262
Mis18bp1	1.79473e-28	-0.76229	0.041	0.218	3.1799e-24	0.188073
Cntn1	4.0157e-26	-0.994239	0.039	0.209	7.11502e-22	0.186603
Nusap1	1.17296e-27	-0.578567	0.032	0.172	2.07825e-23	0.186046
Ccnf	2.59905e-22	-0.511107	0.029	0.156	4.605e-18	0.185897
Prc1	1.29843e-26	-0.716622	0.036	0.201	2.30056e-22	0.179104
Gabbr2	7.39282e-28	-0.916232	0.034	0.198	1.30986e-23	0.171717
Kif14	6.82512e-29	-0.609152	0.029	0.172	1.20927e-24	0.168605
Adamtsl3	1.72042e-31	-0.979868	0.035	0.213	3.04825e-27	0.164319
Depdc1b	1.08949e-18	-0.573262	0.024	0.158	1.93036e-14	0.151899
Grm1	2.2378e-31	-0.997622	0.021	0.159	3.96494e-27	0.132075
Hmmr	9.1217e-26	-0.598906	0.02	0.157	1.61618e-21	0.127388

## Sheet: cluster 5
gene	p_val	avg_log2FC	fraction + in cluster	fraction + not in cluster	p_val_adj	ratio + in:out of cluster
Adamtsl3	1.8658e-46	0.576779	0.53	0.179	3.30583e-42	2.96089
Zmat4	5.25512e-30	0.471597	0.407	0.145	9.31102e-26	2.80689
Ccna2	9.63124e-23	0.255422	0.244	0.096	1.70646e-18	2.54166
Kctd16	2.34822e-15	0.299528	0.209	0.083	4.16057e-11	2.51807
Kif23	6.03946e-37	0.436615	0.462	0.184	1.07007e-32	2.51087
Depdc1b	1.00632e-24	0.311152	0.337	0.135	1.783e-20	2.49629
Nusap1	6.79416e-25	0.349139	0.364	0.147	1.20379e-20	2.47619
Ndst3	1.19939e-35	0.476526	0.582	0.237	2.12509e-31	2.4557
Ephb1	2.14683e-43	0.461718	0.605	0.247	3.80375e-39	2.44939
Hist1h1b	1.30064e-23	0.323812	0.306	0.125	2.30447e-19	2.448
Iqgap3	3.63855e-22	0.277072	0.293	0.12	6.44679e-18	2.44166
Esco2	7.03394e-19	0.317812	0.293	0.12	1.24627e-14	2.44166
Ndc80	1.56123e-24	0.34471	0.328	0.135	2.76619e-20	2.42963
Cdca2	2.13691e-36	0.450751	0.5	0.206	3.78618e-32	2.42718
Ncapg	4.55817e-31	0.376648	0.412	0.17	8.07617e-27	2.42353
Hmmr	4.60056e-21	0.321945	0.324	0.134	8.15128e-17	2.41791
Neil3	2.37221e-32	0.456937	0.495	0.205	4.20308e-28	2.41463
Kif14	1.8746e-23	0.34315	0.357	0.148	3.32141e-19	2.41216
Cdk1	9.96626e-21	0.265367	0.299	0.124	1.76582e-16	2.41129
Pde9a	3.20347e-16	0.287005	0.293	0.122	5.67591e-12	2.40164
Prdm8	8.14621e-23	0.293809	0.336	0.14	1.44335e-18	2.4
Hcn1	3.98924e-24	0.274188	0.355	0.148	7.06814e-20	2.39865
Ckap2l	2.1228e-27	0.31997	0.352	0.147	3.76118e-23	2.39456
Ect2	2.32756e-34	0.409469	0.487	0.204	4.12397e-30	2.38725
Bub1	4.47785e-29	0.32892	0.381	0.16	7.93386e-25	2.38125
Prc1	3.21107e-29	0.333729	0.411	0.173	5.68937e-25	2.37572
Kif11	3.78404e-54	0.536721	0.691	0.291	6.70456e-50	2.37457
Sgo2a	3.18129e-21	0.285102	0.306	0.129	5.63661e-17	2.37209
Kif18b	4.63838e-22	0.298122	0.313	0.132	8.21829e-18	2.37121
Arhgap11a	3.20396e-26	0.319272	0.341	0.144	5.67679e-22	2.36805
Ccnf	3.59311e-21	0.278452	0.317	0.134	6.36627e-17	2.36567
Bub1b	2.69065e-20	0.286988	0.345	0.146	4.76729e-16	2.36301
Foxm1	2.23827e-21	0.253688	0.28	0.119	3.96576e-17	2.35294
Tpx2	7.92717e-33	0.395756	0.515	0.219	1.40454e-28	2.3516
Hist1h1e	4.26736e-17	0.299817	0.324	0.138	7.56091e-13	2.34782
Aspm	7.83337e-48	0.493026	0.626	0.267	1.38792e-43	2.34457
Mis18bp1	1.85577e-30	0.350495	0.44	0.188	3.28806e-26	2.34042
Ttk	4.43042e-27	0.306242	0.344	0.147	7.84982e-23	2.34013
Kif4	1.98944e-40	0.396074	0.517	0.221	3.52488e-36	2.33937
Rtkn2	5.69907e-26	0.292612	0.304	0.13	1.00976e-21	2.33846
Nuf2	9.99714e-18	0.25397	0.28	0.12	1.77129e-13	2.33333
Anln	2.231e-32	0.359154	0.464	0.2	3.95289e-28	2.32
Kif18a	1.25932e-32	0.322159	0.436	0.188	2.23127e-28	2.31915
Kif20b	5.51756e-35	0.471323	0.586	0.255	9.77602e-31	2.29804
Spag5	6.15512e-22	0.280248	0.31	0.136	1.09056e-17	2.27941
Tacc3	3.23428e-14	0.297797	0.348	0.154	5.7305e-10	2.25974
Knl1	8.62782e-38	0.461658	0.666	0.296	1.52868e-33	2.25
Unc5c	4.05431e-35	0.380224	0.582	0.259	7.18342e-31	2.2471
Lockd	1.73327e-21	0.327235	0.38	0.17	3.07101e-17	2.23529
Epb41l1	6.57586e-36	0.396612	0.567	0.254	1.16511e-31	2.23228
Kif15	4.90939e-55	0.504988	0.695	0.312	8.69845e-51	2.22756
Nyap2	1.74257e-28	0.331365	0.536	0.241	3.08749e-24	2.22407
Top2a	2.39961e-55	0.631788	0.841	0.38	4.25163e-51	2.21316
Incenp	6.98152e-26	0.371129	0.48	0.217	1.23699e-21	2.21198
Neurod1	1.96643e-49	0.452301	0.668	0.302	3.48413e-45	2.21192
L3mbtl4	9.25319e-20	0.355764	0.412	0.187	1.63948e-15	2.20321
Cntnap4	1.49943e-17	0.27188	0.434	0.197	2.65669e-13	2.20304
Mapk4	3.34222e-28	0.284726	0.406	0.185	5.92175e-24	2.19459
Mmp24	8.26016e-28	0.30668	0.509	0.232	1.46353e-23	2.19396
Cenpe	1.04309e-43	0.468684	0.646	0.295	1.84815e-39	2.18983
Efcab11	5.95121e-31	0.350663	0.493	0.226	1.05443e-26	2.18141
Gm20125	7.02176e-19	0.307256	0.407	0.187	1.24411e-14	2.17647
Cenpf	1.93924e-43	0.45915	0.604	0.279	3.43594e-39	2.16487
Bora	5.26322e-15	0.251124	0.333	0.155	9.32538e-11	2.14839
Cit	1.95094e-34	0.391544	0.579	0.271	3.45667e-30	2.13653
Racgap1	3.61774e-23	0.34345	0.442	0.207	6.40992e-19	2.13526
Syn3	1.3001e-35	0.290463	0.57	0.271	2.30351e-31	2.10332
Grin2b	4.55911e-56	0.515429	0.854	0.409	8.07783e-52	2.08802
Diaph3	1.56835e-48	0.520805	0.841	0.404	2.7788e-44	2.08168
E2f7	1.79278e-20	0.270298	0.383	0.184	3.17646e-16	2.08152
Cenpp	1.50754e-42	0.437368	0.707	0.341	2.67106e-38	2.07331
Ppm1h	6.16076e-45	0.389693	0.704	0.34	1.09156e-40	2.07059
Rangap1	1.95379e-23	0.25489	0.385	0.186	3.46172e-19	2.06989
Samd12	9.65782e-56	0.4998	0.83	0.406	1.71117e-51	2.04433
Polq	1.1112e-18	0.269274	0.436	0.214	1.96883e-14	2.03738
Mir124a-1hg	1.80199e-22	0.313026	0.611	0.307	3.19277e-18	1.99023
Ppp1r14c	6.79228e-46	0.464565	0.731	0.369	1.20346e-41	1.98103
Ppp2r2b	8.2139e-33	0.253212	0.634	0.323	1.45534e-28	1.96285
Arpp21	8.36171e-47	0.442828	0.78	0.4	1.48153e-42	1.95
Gap43	1.23478e-32	0.331786	0.616	0.317	2.18779e-28	1.94322
Glce	3.8694e-42	0.423448	0.735	0.382	6.85581e-38	1.92408
Ncapd2	1.69589e-24	0.334582	0.579	0.302	3.00478e-20	1.91722
Hivep3	6.46899e-39	0.402787	0.728	0.381	1.14618e-34	1.91076
Synpr	7.00398e-29	0.259576	0.633	0.332	1.24096e-24	1.90663
Plxna2	3.12723e-22	0.256162	0.56	0.297	5.54082e-18	1.88552
Atad2	4.29046e-17	0.261214	0.558	0.298	7.60184e-13	1.87248
Smc4	2.85566e-33	0.424162	0.759	0.406	5.05966e-29	1.86946
Mki67	1.37952e-59	0.543602	0.914	0.49	2.44423e-55	1.86531
Elmo1	5.58724e-39	0.300255	0.76	0.409	9.89948e-35	1.85819
Nrg1	1.51992e-48	0.511122	0.844	0.457	2.693e-44	1.84683
Myt1l	2.09766e-40	0.404559	0.779	0.424	3.71663e-36	1.83726
Cacna1c	1.67611e-46	0.463814	0.826	0.451	2.96973e-42	1.83149
G2e3	6.28229e-24	0.31304	0.615	0.337	1.1131e-19	1.82493
Pag1	3.67162e-17	0.270785	0.566	0.312	6.50538e-13	1.8141
Dner	8.66904e-32	0.390307	0.766	0.423	1.53598e-27	1.81087
Apba1	5.29618e-25	0.319193	0.724	0.4	9.38377e-21	1.81
Cep128	8.03984e-26	0.307864	0.66	0.366	1.4245e-21	1.80328
Cntn2	4.32881e-37	0.319701	0.887	0.494	7.66978e-33	1.79555
Smc2	1.03379e-30	0.347509	0.771	0.431	1.83167e-26	1.78886
Csrnp3	3.354e-17	0.250781	0.604	0.339	5.94262e-13	1.78171
Lmnb1	2.06754e-19	0.281836	0.649	0.369	3.66326e-15	1.75881
Ckap5	1.71982e-30	0.407723	0.745	0.425	3.04718e-26	1.75294
Lrrc4c	2.4217e-11	-0.444003	0.34	0.194	4.29077e-07	1.75258
Lrp1b	5.33882e-08	-0.389818	0.355	0.203	0.000945932	1.74877
Rad21	4.04973e-16	0.261112	0.626	0.358	7.17531e-12	1.7486
Cadps2	4.73375e-32	0.366868	0.774	0.443	8.38726e-28	1.74718
Usp29	2.49504e-16	0.267511	0.669	0.383	4.42072e-12	1.74674
Tmem2	7.9303e-19	0.275959	0.664	0.381	1.40509e-14	1.74278
Nrxn3	3.18864e-12	-0.294146	0.477	0.275	5.64964e-08	1.73454
Stxbp5l	4.83253e-40	0.342659	0.813	0.469	8.56228e-36	1.73348
St18	5.60988e-38	0.327443	0.821	0.478	9.93959e-34	1.71757
Cadm2	1.76893e-53	0.408015	0.901	0.527	3.13419e-49	1.70968
Slc4a4	1.75713e-06	-0.304269	0.253	0.148	0.0311329	1.70946
Kcnj6	9.66714e-33	0.391823	0.801	0.475	1.71282e-28	1.68632
Egfr	1.26718e-24	0.354936	0.797	0.478	2.24519e-20	1.66736
Hs6st3	1.11932e-35	0.400964	0.763	0.458	1.98321e-31	1.66594
Ankrd44	1.54414e-24	0.270745	0.704	0.423	2.7359e-20	1.6643
Clvs1	1.35861e-25	0.271677	0.789	0.475	2.40719e-21	1.66105
Zfp385b	1.03919e-32	0.368001	0.819	0.496	1.84124e-28	1.65121
Kcnj3	6.66426e-33	0.376675	0.857	0.52	1.18077e-28	1.64808
Brd8	1.95846e-14	0.258464	0.667	0.406	3.47e-10	1.64286
Kcnq5	9.13248e-33	0.431264	0.831	0.507	1.61809e-28	1.63905
Kcnd2	2.1689e-06	-0.557107	0.41	0.253	0.0384287	1.62055
Cdk5rap2	9.03583e-25	0.287093	0.769	0.477	1.60097e-20	1.61216
Celf4	4.63179e-40	0.445163	0.936	0.59	8.20661e-36	1.58644
Mbp	1.27211e-05	-0.341394	0.333	0.21	0.225393	1.58571
Msra	6.84649e-16	0.258863	0.735	0.464	1.21306e-11	1.58405
March1	1.48306e-29	0.366672	0.888	0.562	2.62768e-25	1.58007
Gpm6a	1.58022e-32	0.383905	0.903	0.577	2.79984e-28	1.56499
Klhl29	1.43855e-51	0.558356	0.93	0.601	2.54882e-47	1.54742
Rasgef1b	1.14254e-50	0.464347	0.904	0.589	2.02435e-46	1.5348
Nrcam	1.77214e-35	0.324507	0.868	0.566	3.13988e-31	1.53357
Tmtc2	5.3432e-26	0.289435	0.871	0.571	9.46708e-22	1.52539
Fgf13	8.19887e-37	0.380197	0.872	0.572	1.45268e-32	1.52448
Mtss1	9.18591e-33	0.367633	0.868	0.57	1.62756e-28	1.52281
Plppr1	8.8492e-34	0.274611	0.903	0.596	1.5679e-29	1.5151
Sorbs1	3.03012e-25	0.312799	0.885	0.593	5.36878e-21	1.49241
Fgf14	2.64552e-05	-0.575063	0.485	0.327	0.468733	1.48318
Ralyl	0.000839164	-0.264736	0.465	0.324	1	1.43518
Dpp6	0.0805648	-0.262573	0.543	0.381	1	1.4252
Xkr4	1.73336e-32	0.36778	0.934	0.66	3.07117e-28	1.41515
Lhfp	0.191664	-0.295882	0.171	0.121	1	1.41322
Map1b	2.71494e-24	0.267012	0.913	0.649	4.81033e-20	1.40678
Sema6a	1.65872e-28	0.319603	0.925	0.658	2.93891e-24	1.40577
Syne1	0.0152325	-0.448553	0.371	0.264	1	1.4053
Npas3	0.00346496	-0.30522	0.649	0.462	1	1.40476
Bcas1	2.02947e-05	-0.279611	0.453	0.324	0.359582	1.39815
Pcdh15	0.0591684	-0.501674	0.151	0.108	1	1.39815
Gpcpd1	0.0408399	-0.258718	0.362	0.259	1	1.39768
Ncam2	0.0151054	-0.410345	0.271	0.194	1	1.39691
Zfp521	1.23606e-38	0.41464	0.938	0.672	2.19005e-34	1.39583
Tmem108	6.45443e-05	-0.251139	0.161	0.117	1	1.37607
Zfpm2	1.46525e-53	0.495822	0.948	0.689	2.59613e-49	1.37591
Trpm3	0.0101349	-0.712817	0.294	0.215	1	1.36744
Tjp1	0.000360326	-0.29391	0.511	0.376	1	1.35904
Pcdh9	0.00067035	-0.614843	0.641	0.477	1	1.34382
Macrod2	5.89905e-20	0.297018	0.93	0.697	1.04519e-15	1.33429
Plcb1	2.88702e-23	0.275169	0.956	0.72	5.11522e-19	1.32778
Zdhhc14	0.232333	-0.282337	0.441	0.333	1	1.32432
Tnik	1.58352e-35	0.346216	0.97	0.736	2.80568e-31	1.31793
Sgms1	0.00183078	-0.339227	0.332	0.253	1	1.31225
Svil	0.0918183	-0.2743	0.4	0.305	1	1.31147
Nr3c2	0.14735	-0.299314	0.482	0.368	1	1.30978
Pde4b	0.13861	-0.303912	0.68	0.52	1	1.30769
Lamc1	0.0564094	-0.254077	0.285	0.218	1	1.30734
Prmt8	0.436561	-0.277733	0.605	0.463	1	1.3067
Xist	2.84137e-09	0.399129	0.548	0.423	5.03433e-05	1.29551
Enox1	6.69483e-25	0.274155	0.95	0.734	1.18619e-20	1.29428
Rftn1	0.0847822	-0.266259	0.652	0.504	1	1.29365
Whrn	0.692991	-0.267142	0.395	0.307	1	1.28664
Rapgef4	0.0161869	-0.331788	0.222	0.173	1	1.28324
Rbms3	0.537121	-0.360353	0.485	0.378	1	1.28307
Aff3	3.06025e-20	0.271414	0.942	0.742	5.42216e-16	1.26954
Greb1l	0.401294	-0.277025	0.348	0.275	1	1.26545
Barhl1	0.571356	-0.257934	0.492	0.389	1	1.26478
Sh3d19	0.045316	-0.254514	0.269	0.213	1	1.26291
Kcnb2	2.99883e-46	0.394962	0.979	0.778	5.31333e-42	1.25835
Dgkb	0.421774	-0.253018	0.298	0.237	1	1.25738
Lama2	0.317547	-0.356898	0.312	0.249	1	1.25301
Fhit	0.0561971	-0.317422	0.368	0.294	1	1.2517
Qk	0.742092	-0.315073	0.761	0.61	1	1.24754
Grid2	0.90103	-0.251542	0.872	0.699	1	1.2475
Ust	0.464077	-0.359803	0.616	0.495	1	1.24444
Sema7a	0.930233	-0.36007	0.634	0.511	1	1.2407
Kirrel3	0.0143244	-0.712853	0.192	0.155	1	1.23871
Col4a1	0.181264	-0.454142	0.235	0.19	1	1.23684
Eps8	0.935931	-0.283818	0.157	0.127	1	1.23622
Draxin	0.922802	-0.308917	0.735	0.595	1	1.23529
Slc1a2	0.223269	-0.2942	0.756	0.615	1	1.22927
Arhgap31	0.390079	-0.332007	0.392	0.319	1	1.22884
Ntm	0.0386938	-0.431619	0.802	0.654	1	1.2263
Arhgap26	0.0673408	-0.303215	0.234	0.191	1	1.22513
Wwc1	0.20263	-0.280041	0.23	0.188	1	1.2234
Cbfa2t3	0.348121	-0.375658	0.715	0.586	1	1.22014
Eln	0.113247	-0.363908	0.267	0.219	1	1.21918
Nedd4l	1.92547e-26	0.266657	0.962	0.79	3.41154e-22	1.21772
Btbd11	0.0420612	-0.508899	0.784	0.65	1	1.20615
Tmem163	0.0122295	-0.477852	0.762	0.633	1	1.20379
Rnf220	0.377824	-0.293397	0.839	0.698	1	1.20201
Rbfox1	5.62672e-39	0.373554	0.989	0.825	9.96942e-35	1.19879
Chst11	0.677851	-0.316945	0.202	0.169	1	1.19527
Ptprm	0.532517	-0.649342	0.274	0.23	1	1.1913
Plxdc2	0.740137	-0.454524	0.204	0.174	1	1.17241
Tcf7l2	0.784329	-0.333186	0.254	0.217	1	1.17051
Lhfpl3	0.0870087	-1.08911	0.186	0.159	1	1.16981
Bsg	0.131117	-0.28395	0.151	0.13	1	1.16154
Col4a2	0.718243	-0.46615	0.226	0.195	1	1.15897
Ncor2	0.345514	-0.260649	0.924	0.799	1	1.15645
Ntrk3	0.000145158	-0.491962	0.933	0.811	1	1.15043
Epn2	0.357454	-0.263434	0.205	0.179	1	1.14525
Maml2	0.00788417	-0.299134	0.895	0.783	1	1.14304
Gse1	0.0821498	-0.255141	0.944	0.829	1	1.13872
Fbxl7	0.174766	-0.339153	0.198	0.174	1	1.13793
Ctnna2	3.01811e-27	0.31375	0.997	0.883	5.34749e-23	1.12911
Astn2	3.88335e-24	0.268174	0.991	0.878	6.88052e-20	1.1287
Itsn2	0.0137709	-0.271342	0.247	0.219	1	1.12785
Pde4d	5.98254e-36	0.357761	0.996	0.889	1.05999e-31	1.12036
Ptprg	3.7971e-06	-0.466436	0.929	0.832	0.067277	1.11659
Zmiz1	0.00385478	-0.279044	0.94	0.842	1	1.11639
Ank2	1.53701e-25	0.256368	0.991	0.894	2.72328e-21	1.1085
Sash1	0.672567	-0.371101	0.199	0.181	1	1.09945
Erbb4	1.16778e-42	0.340938	0.999	0.91	2.06907e-38	1.0978
Mast4	0.449131	-0.477249	0.157	0.144	1	1.09028
Obscn	0.624411	-0.454565	0.238	0.219	1	1.08676
Stard13	0.266724	-0.439216	0.162	0.15	1	1.08
Pde7b	0.798097	-0.373789	0.183	0.17	1	1.07647
Grik2	1.73137e-28	0.257544	0.998	0.942	3.06764e-24	1.05945
Zeb1	1.12808e-06	-0.303343	0.989	0.94	0.0199873	1.05213
Celf2	6.78919e-33	0.321917	0.999	0.96	1.20291e-28	1.04062
Dcc	7.52333e-05	-0.257456	1	0.982	1	1.01833
Prkg1	0.0594412	-0.792815	0.158	0.169	1	0.934911
Dock9	0.758338	-0.540153	0.144	0.155	1	0.929032
Asic2	0.237559	-0.748419	0.139	0.156	1	0.891025
Itpr2	0.00345574	-0.535886	0.136	0.167	1	0.814371

## Sheet: cluster 6
gene	p_val	avg_log2FC	fraction + in cluster	fraction + not in cluster	p_val_adj	ratio + in:out of cluster
Gm29521	1.24615e-31	1.0064	0.231	0.069	2.20792e-27	3.34782
March4	7.57503e-36	1.05852	0.275	0.084	1.34214e-31	3.27381
Kctd16	9.39139e-27	1.22812	0.231	0.077	1.66397e-22	3
Gdpd5	1.32192e-27	1.05204	0.293	0.1	2.34217e-23	2.93
Gprin3	5.19486e-18	0.863222	0.219	0.077	9.20425e-14	2.84415
Adamtsl3	3.82975e-50	1.18873	0.435	0.174	6.78554e-46	2.5
Galr1	1.7977e-11	0.612674	0.162	0.068	3.18517e-07	2.38235
Sept4	3.43705e-22	0.872866	0.287	0.121	6.08977e-18	2.3719
Plcd1	5.94025e-10	0.532014	0.152	0.065	1.05249e-05	2.33846
Chrna3	1.62845e-22	0.841782	0.277	0.119	2.8853e-18	2.32773
Neurod1	5.91698e-73	1.48434	0.668	0.29	1.04837e-68	2.30345
Nhlh1	1.34279e-17	0.921467	0.338	0.149	2.37915e-13	2.26845
Pdzrn3	7.62291e-45	1.08776	0.44	0.194	1.35063e-40	2.26804
Gm26871	4.53793e-19	0.92482	0.269	0.119	8.04031e-15	2.2605
Mmp24	4.45328e-37	1.1683	0.498	0.223	7.89033e-33	2.23318
Samd12	1.95609e-142	1.91446	0.85	0.389	3.4658e-138	2.18509
Apc2	2.40059e-21	0.852582	0.324	0.15	4.25336e-17	2.16
Wscd2	1.08867e-27	0.931713	0.338	0.157	1.9289e-23	2.15286
Dpysl3	1.27324e-35	0.963259	0.382	0.179	2.25593e-31	2.13408
Tubb3	7.84935e-18	0.697077	0.246	0.117	1.39075e-13	2.10256
Srgap3	4.06868e-116	1.59544	0.776	0.373	7.20889e-112	2.08043
Ppm1h	1.24481e-72	1.40612	0.683	0.329	2.20556e-68	2.07599
Tmem150c	6.40882e-10	0.519156	0.151	0.073	1.13552e-05	2.06849
Nyap2	1.52458e-33	1.07118	0.482	0.235	2.70126e-29	2.05106
St8sia2	2.18446e-17	0.781387	0.26	0.128	3.87042e-13	2.03125
Grin2b	8.66786e-108	1.5149	0.806	0.397	1.53577e-103	2.03023
Prickle2	5.6969e-26	1.05763	0.405	0.203	1.00938e-21	1.99507
L3mbtl4	2.49657e-29	1.01643	0.365	0.183	4.42343e-25	1.99453
Cntn2	1.8693e-180	1.78794	0.942	0.477	3.31203e-176	1.97484
Cadm3	1.56842e-56	1.25342	0.626	0.318	2.77893e-52	1.96855
Gap43	1.05641e-56	1.26728	0.603	0.308	1.87174e-52	1.95779
Mast1	4.9211e-15	0.589624	0.213	0.109	8.71921e-11	1.95413
Ttyh2	4.46381e-13	0.563285	0.189	0.097	7.90897e-09	1.94845
Serpini1	9.81837e-11	0.705272	0.243	0.125	1.73962e-06	1.944
Epb41l4a	3.00666e-18	0.872209	0.316	0.163	5.3272e-14	1.93865
Celf3	3.7266e-20	0.908639	0.411	0.213	6.6028e-16	1.92958
Map3k13	1.17402e-41	1.06846	0.513	0.266	2.08013e-37	1.92857
Ppp2r2b	1.16138e-54	1.33128	0.607	0.315	2.05774e-50	1.92698
Kif21b	8.44258e-25	0.970186	0.447	0.232	1.49586e-20	1.92672
L1cam	2.72748e-11	0.557762	0.205	0.107	4.83256e-07	1.91589
Mir124a-1hg	1.99257e-47	1.04325	0.57	0.3	3.53044e-43	1.9
Shf	9.76287e-11	0.587126	0.215	0.114	1.72979e-06	1.88596
Stmn2	7.27912e-43	1.04076	0.538	0.286	1.28971e-38	1.88112
Myt1	1.33461e-58	1.12014	0.622	0.334	2.36466e-54	1.86227
Cyfip2	6.38606e-17	0.817976	0.32	0.174	1.13148e-12	1.83908
Gabbr2	1.55523e-16	0.842915	0.305	0.17	2.75556e-12	1.79412
Stmn4	1.5962e-09	0.637059	0.265	0.148	2.82814e-05	1.79054
Map6	5.89587e-17	0.780141	0.334	0.187	1.04463e-12	1.7861
Prdm8	3.74492e-07	0.631326	0.248	0.14	0.00663525	1.77143
Asic1	1.02037e-07	0.454023	0.154	0.087	0.0018079	1.77011
Scrt2	1.68751e-11	0.692308	0.303	0.173	2.98993e-07	1.75144
Abhd16a	1.03226e-05	0.53108	0.206	0.118	0.182896	1.74576
Podxl2	1.69054e-17	0.869267	0.425	0.247	2.9953e-13	1.72065
Nfasc	1.61194e-21	0.574264	0.454	0.264	2.85603e-17	1.7197
Acss2	1.98497e-10	0.482656	0.182	0.106	3.51696e-06	1.71698
St18	7.20791e-81	1.23738	0.799	0.468	1.2771e-76	1.70726
Gm31409	5.51066e-09	0.637933	0.265	0.156	9.76379e-05	1.69872
Hmgcll1	4.86371e-05	0.468868	0.166	0.098	0.861752	1.69388
Nrg1	3.48642e-71	1.39967	0.755	0.45	6.17725e-67	1.67778
Stxbp5l	1.18266e-82	1.23767	0.765	0.46	2.09544e-78	1.66304
Myt1l	7.28798e-62	1.24349	0.694	0.418	1.29128e-57	1.66029
Clvs1	2.40949e-80	1.13301	0.772	0.466	4.26914e-76	1.65665
Nol4l	1.32566e-06	0.577444	0.255	0.154	0.0234881	1.65584
Syp	1.10903e-08	0.525821	0.225	0.136	0.000196497	1.65441
Tspoap1	4.51228e-18	0.758516	0.387	0.235	7.99486e-14	1.64681
Kif5a	9.64851e-21	0.71923	0.355	0.216	1.70952e-16	1.64352
Cdk5r1	2.37196e-09	0.502848	0.212	0.129	4.20263e-05	1.64341
Glce	1.56018e-52	1.00463	0.621	0.378	2.76433e-48	1.64286
Ina	1.37325e-10	0.610286	0.279	0.17	2.43313e-06	1.64118
Clmp	1.35159e-71	1.26326	0.735	0.448	2.39475e-67	1.64062
Gm20696	3.31882e-49	1.06408	0.677	0.415	5.88029e-45	1.63132
Plppr3	2.80141e-11	0.572221	0.269	0.165	4.96354e-07	1.6303
Kcnj6	2.44268e-57	1.18629	0.756	0.467	4.32795e-53	1.61884
Celf5	4.79621e-08	0.429904	0.182	0.113	0.000849793	1.61062
Nhlh2	8.22493e-21	0.749207	0.396	0.246	1.45729e-16	1.60976
Sphkap	2.32509e-36	0.960481	0.54	0.337	4.11959e-32	1.60237
Plppr1	2.84413e-140	1.52681	0.932	0.583	5.03923e-136	1.59863
Kcnq2	1.14178e-19	0.709922	0.402	0.253	2.02301e-15	1.58893
Tmem2	8.1092e-37	1.04216	0.599	0.377	1.43679e-32	1.58886
Mapk8ip1	6.38871e-07	0.449056	0.192	0.121	0.0113195	1.58678
Syt1	2.19338e-06	0.544926	0.29	0.183	0.0388624	1.5847
Mex3b	0.000110627	0.424955	0.174	0.11	1	1.58182
Pacsin1	0.0162771	0.376677	0.155	0.098	1	1.58163
Mturn	4.59361e-10	0.437151	0.183	0.116	8.13895e-06	1.57758
Gpr158	1.5275e-22	0.834069	0.533	0.338	2.70642e-18	1.57692
Cpeb2	2.18972e-06	0.472635	0.196	0.125	0.0387974	1.568
Dpysl5	9.25079e-20	0.804279	0.46	0.294	1.63905e-15	1.56463
Ppp1r14c	4.84125e-34	0.91753	0.573	0.368	8.57772e-30	1.55706
Vash1	3.05253e-10	0.575388	0.256	0.165	5.40846e-06	1.55151
Gm5087	0.000291093	0.417533	0.172	0.111	1	1.54955
Dner	4.18055e-36	0.944228	0.646	0.42	7.40709e-32	1.53809
Gpc2	3.25606e-09	0.425599	0.189	0.123	5.76909e-05	1.53658
Atp8a2	1.6366e-05	0.488808	0.221	0.144	0.289972	1.53472
Snap91	1.9159e-10	0.568248	0.317	0.207	3.39459e-06	1.5314
Nrn1	9.74712e-11	0.624956	0.342	0.224	1.72699e-06	1.52679
March3	1.7144e-06	0.671313	0.299	0.196	0.0303758	1.52551
Elmo1	3.85354e-32	0.793492	0.62	0.407	6.8277e-28	1.52334
Apba1	1.34566e-39	0.896283	0.603	0.398	2.38424e-35	1.51507
Frmpd3	3.00217e-06	0.710142	0.29	0.192	0.0531925	1.51042
Ggt7	0.000119809	0.436717	0.189	0.126	1	1.5
Pou2f2	1.5483e-05	0.543147	0.28	0.187	0.274327	1.49733
Slc17a6	8.11597e-22	0.780065	0.574	0.384	1.43799e-17	1.49479
March1	3.58273e-75	1.15464	0.829	0.555	6.34788e-71	1.49369
Dopey2	4.86399e-17	0.568401	0.31	0.208	8.61802e-13	1.49038
Srcin1	8.17342e-08	0.414044	0.254	0.171	0.00144817	1.48538
Dcx	5.37906e-56	1.03055	0.774	0.522	9.53062e-52	1.48276
Lzts1	1.10532e-10	0.536167	0.323	0.218	1.9584e-06	1.48165
Gm20125	5.80684e-09	0.578587	0.28	0.189	0.000102886	1.48148
Pcdha11	4.49437e-11	0.606858	0.305	0.206	7.96313e-07	1.48058
Celf4	1.56035e-70	1.03104	0.863	0.583	2.76464e-66	1.48027
Ntrk2	1.0389e-06	0.520642	0.321	0.217	0.0184072	1.47926
Gpm6a	9.48871e-73	1.05181	0.843	0.571	1.68121e-68	1.47636
Nova2	4.35645e-30	0.814747	0.538	0.365	7.71876e-26	1.47397
Nkain1	2.35267e-08	0.616627	0.377	0.256	0.000416846	1.47266
Uncx	3.27113e-09	0.559987	0.338	0.23	5.79578e-05	1.46956
Mapk4	0.000148984	0.533756	0.274	0.187	1	1.46524
Dusp8	0.00596164	0.372751	0.167	0.114	1	1.46491
Stxbp1	2.7215e-20	0.755236	0.471	0.322	4.82196e-16	1.46273
Pdgfra	1.21757e-05	0.386546	0.212	0.145	0.215729	1.46207
Ncan	5.55626e-05	0.480107	0.245	0.168	0.984459	1.45833
Snhg14	3.77427e-23	0.626963	0.535	0.367	6.68725e-19	1.45777
Dbn1	6.95084e-07	0.534046	0.288	0.198	0.0123155	1.45454
Lingo1	1.73873e-06	0.459333	0.215	0.148	0.0308069	1.4527
Rab6b	7.93476e-26	0.817824	0.601	0.414	1.40588e-21	1.45169
Gm26953	2.41788e-07	0.516662	0.28	0.193	0.004284	1.45078
Igsf21	5.90618e-19	0.798331	0.515	0.356	1.04646e-14	1.44663
Tmtc2	6.81515e-73	1.02946	0.816	0.565	1.20751e-68	1.44425
Mtmr4	7.69577e-07	0.460948	0.218	0.151	0.0136354	1.44371
Bin1	1.85183e-27	0.77278	0.541	0.375	3.28108e-23	1.44267
Ano4	2.68731e-07	0.665615	0.326	0.226	0.00476137	1.44248
Afap1	1.49779e-37	0.865818	0.607	0.423	2.65379e-33	1.43499
Atp9a	0.000670749	0.467166	0.229	0.16	1	1.43125
Sept3	6.5217e-19	0.724399	0.515	0.36	1.15551e-14	1.43056
Rcor2	1.34844e-06	0.545897	0.319	0.223	0.0238916	1.43049
Nrcam	2.25478e-63	1.03079	0.801	0.56	3.99501e-59	1.43036
Klhl29	7.10039e-69	1.17975	0.851	0.595	1.25805e-64	1.43025
Rasgef1b	6.64415e-54	1.13856	0.832	0.584	1.17721e-49	1.42466
Gm37298	8.90134e-05	0.393753	0.172	0.121	1	1.42149
Zfp423	3.50037e-54	1.09943	0.744	0.525	6.20195e-50	1.41714
Pard6g	8.22283e-06	0.446622	0.194	0.137	0.145692	1.41606
Chd3	0.00359253	0.411939	0.205	0.145	1	1.41379
Dscaml1	2.7945e-47	0.956027	0.772	0.547	4.95129e-43	1.41133
Kcnj3	5.44724e-37	0.871073	0.731	0.518	9.65142e-33	1.4112
Cacna1c	3.17279e-25	0.584602	0.636	0.452	5.62155e-21	1.40708
Ankrd13a	0.0360443	0.437849	0.239	0.17	1	1.40588
Plcl1	1.20098e-20	0.728477	0.561	0.4	2.1279e-16	1.4025
Ephb1	3.85381e-10	0.504826	0.354	0.253	6.82818e-06	1.39921
Sema6a	2.75408e-100	1.24993	0.909	0.65	4.87969e-96	1.39846
Synpr	3.85617e-11	0.666157	0.466	0.334	6.83235e-07	1.39521
Slc24a3	1.25555e-08	0.661754	0.303	0.218	0.000222458	1.38991
Nrxn3	8.12022e-11	0.316756	0.382	0.275	1.43874e-06	1.38909
Unc5c	9.51586e-07	0.292584	0.366	0.264	0.0168602	1.38636
Pgm2l1	3.1836e-05	0.437817	0.234	0.169	0.564069	1.38461
Pak7	1.58645e-65	0.953143	0.85	0.615	2.81087e-61	1.38211
Nrep	2.35097e-12	0.547612	0.359	0.26	4.16545e-08	1.38077
Sox11	1.16119e-53	0.90332	0.735	0.534	2.0574e-49	1.3764
Syn3	3.04631e-11	0.485637	0.378	0.275	5.39745e-07	1.37454
Tubb2b	4.42617e-05	0.37598	0.2	0.146	0.784229	1.36986
Ndst3	3.06615e-05	0.429487	0.334	0.244	0.543261	1.36885
Kcnk1	0.00347428	0.372455	0.193	0.141	1	1.36879
Igfbpl1	1.51096e-09	0.572369	0.427	0.312	2.67712e-05	1.36859
Brsk2	1.51451e-15	0.698768	0.487	0.356	2.68342e-11	1.36798
Wdr47	6.21455e-05	0.441933	0.232	0.17	1	1.36471
Pik3c2b	0.002866	0.39062	0.186	0.137	1	1.35766
Herc3	2.94394e-06	0.402637	0.209	0.154	0.0521608	1.35714
Sorbs1	1.25159e-57	0.834243	0.798	0.589	2.21757e-53	1.35484
Map3k12	0.0193384	0.383305	0.195	0.144	1	1.35417
Gm9801	5.43131e-17	0.605873	0.422	0.312	9.62319e-13	1.35256
Xkr6	3.83907e-24	0.75059	0.572	0.423	6.80206e-20	1.35225
Rims1	3.8634e-30	0.637187	0.66	0.489	6.84517e-26	1.34969
Sptbn1	2.62302e-32	0.742806	0.711	0.527	4.64746e-28	1.34915
Nxpe3	0.00213647	0.396571	0.201	0.149	1	1.34899
Slc44a1	5.00578e-09	0.564781	0.406	0.301	8.86923e-05	1.34884
Dtna	2.7361e-07	0.426833	0.294	0.218	0.00484782	1.34862
Trpc4ap	2.78736e-09	0.475302	0.306	0.227	4.93865e-05	1.34802
Ephb2	4.86148e-33	0.847822	0.715	0.532	8.61357e-29	1.34398
Ppfia2	1.32485e-60	1.00388	0.843	0.628	2.34737e-56	1.34236
Nrxn2	4.86736e-08	0.461539	0.361	0.269	0.000862399	1.34201
Kdm5b	4.83232e-20	0.565164	0.436	0.325	8.5619e-16	1.34154
Xkr4	7.33714e-54	0.92854	0.877	0.655	1.29999e-49	1.33893
Gm4258	6.09446e-52	0.881397	0.771	0.577	1.07982e-47	1.33622
Atp8b2	0.000227019	0.343079	0.167	0.125	1	1.336
Ckb	0.00849218	0.437385	0.251	0.188	1	1.33511
Unc5d	0.00010625	0.497409	0.282	0.212	1	1.33019
Tnik	4.93261e-127	1.22979	0.966	0.728	8.73959e-123	1.32692
Elavl4	1.14663e-10	0.582748	0.445	0.336	2.0316e-06	1.3244
Akap12	0.00216548	0.315444	0.16	0.121	1	1.32231
Atl1	0.00103038	0.437081	0.263	0.199	1	1.32161
Epb41l1	6.05417e-08	0.473618	0.343	0.26	0.00107268	1.31923
Sbk1	0.017491	0.38318	0.215	0.163	1	1.31902
Map1b	2.71799e-54	0.92392	0.849	0.644	4.81573e-50	1.31832
Slco5a1	3.1627e-07	0.446106	0.253	0.192	0.00560367	1.31771
Hivep2	8.65484e-27	0.740164	0.657	0.499	1.53347e-22	1.31663
Brinp1	3.51639e-05	0.461701	0.3	0.228	0.623034	1.31579
Ddah2	0.00493108	0.367365	0.175	0.133	1	1.31579
Limk1	0.000106323	0.367937	0.192	0.146	1	1.31507
Lhx1os	1.88399e-10	0.480654	0.372	0.283	3.33806e-06	1.31449
Prr36	0.020389	0.327721	0.172	0.131	1	1.31298
Xkr7	1.3865e-08	0.49449	0.357	0.272	0.00024566	1.3125
Ttbk1	1.65471e-05	0.433475	0.248	0.189	0.293181	1.31217
Phactr3	0.000418342	0.317346	0.185	0.141	1	1.31206
Dgki	2.18039e-17	0.511361	0.48	0.366	3.86322e-13	1.31148
Rtn1	4.74003e-25	0.688967	0.666	0.51	8.39839e-21	1.30588
Fam214a	0.000388916	0.411582	0.281	0.216	1	1.30093
Mtss1	8.88936e-28	0.801448	0.74	0.569	1.57502e-23	1.30053
Unc79	7.27113e-17	0.600121	0.567	0.436	1.2883e-12	1.30046
Fam107b	0.00243178	0.436281	0.295	0.227	1	1.29956
Egfr	3.69632e-22	0.684578	0.622	0.479	6.54914e-18	1.29854
Scmh1	3.55488e-39	0.849	0.744	0.573	6.29853e-35	1.29843
Col11a1	8.42281e-24	0.674168	0.624	0.482	1.49235e-19	1.29461
Rab30	1.55519e-07	0.52618	0.365	0.282	0.00275548	1.29433
Fbxo32	0.0407422	0.321961	0.181	0.14	1	1.29286
Unc13a	7.54188e-06	0.503281	0.377	0.292	0.133627	1.2911
Zfpm1	1.25783e-05	0.332781	0.165	0.128	0.222862	1.28906
Tcte2	0.00142821	0.448207	0.282	0.219	1	1.28767
Basp1	4.76875e-29	0.7577	0.723	0.562	8.44927e-25	1.28648
Elavl2	1.01068e-19	0.678264	0.539	0.419	1.79071e-15	1.2864
Add2	5.16526e-10	0.53836	0.423	0.329	9.15181e-06	1.28571
Miat	1.3438e-61	0.988965	0.911	0.709	2.38094e-57	1.28491
Disc1	0.000206093	0.354922	0.2	0.156	1	1.28205
Nsg1	4.03014e-06	0.371312	0.22	0.172	0.0714061	1.27907
Pax6	3.10536e-13	0.613169	0.573	0.448	5.50208e-09	1.27902
Lhx1	8.97278e-07	0.49809	0.376	0.294	0.015898	1.27891
Asxl3	1.75431e-12	0.577835	0.546	0.427	3.10829e-08	1.27869
Ntn4	9.70742e-11	0.578063	0.482	0.377	1.71996e-06	1.27851
Sgsm1	0.0170527	0.341054	0.193	0.151	1	1.27814
Plxna3	3.65272e-07	0.391686	0.23	0.18	0.00647189	1.27778
Syt11	2.82008e-06	0.522548	0.41	0.321	0.0499661	1.27726
Adarb1	0.0482274	0.383773	0.231	0.181	1	1.27624
Slc37a3	0.00240765	0.319821	0.176	0.138	1	1.27536
Plcb1	1.66506e-87	1.1869	0.913	0.716	2.95016e-83	1.27514
Zfp521	2.08026e-60	1.04788	0.853	0.669	3.68581e-56	1.27504
Kidins220	1.30311e-10	0.542726	0.473	0.371	2.30884e-06	1.27493
Gpr137c	1.63026e-11	0.577848	0.465	0.365	2.8885e-07	1.27397
Mgat5b	4.75917e-12	0.548197	0.475	0.373	8.4323e-08	1.27346
Crtc3	3.16235e-08	0.46036	0.303	0.238	0.000560306	1.27311
Evi5l	0.00427953	0.347082	0.196	0.154	1	1.27273
Mapk10	8.5295e-41	0.721735	0.772	0.607	1.51126e-36	1.27183
Cacna1b	2.28588e-10	0.551754	0.539	0.424	4.05013e-06	1.27123
Sh3kbp1	9.6386e-09	0.577885	0.447	0.352	0.000170777	1.26989
Kif3c	0.000307744	0.368711	0.212	0.167	1	1.26946
Hip1r	0.00910384	0.347081	0.189	0.149	1	1.26846
Pik3r3	1.77271e-16	0.591443	0.545	0.43	3.14088e-12	1.26744
Efr3b	3.55793e-06	0.396191	0.327	0.258	0.0630395	1.26744
Sema6c	0.00447088	0.283704	0.172	0.136	1	1.2647
Myo1b	1.93185e-05	0.420707	0.368	0.291	0.342285	1.2646
Kcnk10	0.00153493	0.422303	0.249	0.197	1	1.26396
Ap3s1	0.00359221	0.339052	0.197	0.156	1	1.26282
Rundc3b	0.00894089	0.337022	0.197	0.156	1	1.26282
Pclo	9.70879e-16	0.546575	0.568	0.45	1.7202e-11	1.26222
Ctif	1.601e-27	0.748692	0.727	0.576	2.83665e-23	1.26215
Rai2	0.00392604	0.429106	0.236	0.187	1	1.26203
Aig1	4.31963e-07	0.489606	0.328	0.26	0.00765351	1.26154
Gm20687	0.000133804	0.408387	0.254	0.202	1	1.25743
Enox2	5.12408e-11	0.61987	0.48	0.382	9.07884e-07	1.25654
Elavl3	1.1127e-33	0.654512	0.735	0.585	1.97148e-29	1.25641
Clip3	0.000532724	0.392177	0.27	0.215	1	1.25581
Psd3	1.03633e-38	0.827555	0.779	0.621	1.83616e-34	1.25443
Kcnb2	1.90471e-122	1.25595	0.968	0.772	3.37477e-118	1.25389
Enox1	4.54901e-74	0.998186	0.914	0.729	8.05993e-70	1.25377
Hivep3	2.50032e-09	0.336891	0.485	0.387	4.43006e-05	1.25323
Ank1	0.00189791	0.263786	0.154	0.123	1	1.25203
Inpp4a	0.00105577	0.410215	0.256	0.205	1	1.24878
Kdm7a	2.22785e-05	0.427665	0.313	0.251	0.39473	1.24701
Ubash3b	3.11989e-12	0.572794	0.392	0.315	5.52782e-08	1.24444
Kcnc3	4.90704e-09	0.447757	0.342	0.275	8.69429e-05	1.24364
Itm2b	0.000386455	0.403971	0.238	0.192	1	1.23958
Nav3	3.1542e-65	0.874691	0.922	0.745	5.5886e-61	1.23758
Nova1	6.84425e-23	0.640989	0.627	0.509	1.21266e-18	1.23183
Tmem63b	1.01539e-09	0.447559	0.378	0.307	1.79907e-05	1.23127
Pkia	5.47019e-06	0.501852	0.44	0.358	0.0969208	1.22905
Atat1	0.000246931	0.310113	0.199	0.162	1	1.22839
Arhgap20	0.000403046	0.298303	0.157	0.128	1	1.22656
Git2	2.68975e-13	0.540178	0.509	0.415	4.76569e-09	1.22651
Slc8a2	0.310512	0.262242	0.168	0.137	1	1.22628
Edil3	8.01296e-30	0.76009	0.782	0.638	1.41974e-25	1.22571
Klhl32	0.135148	0.305232	0.164	0.134	1	1.22388
Adcy5	0.000117892	0.402675	0.297	0.243	1	1.22222
Pde9a	0.183089	0.258606	0.154	0.126	1	1.22222
Smpd3	1.02612e-05	0.532734	0.47	0.385	0.181808	1.22078
Tuba1a	3.57109e-14	0.559549	0.49	0.402	6.32725e-10	1.21891
Tenm2	1.78546e-06	0.344718	0.288	0.237	0.0316348	1.21519
Hspa4l	0.0234456	0.33879	0.181	0.149	1	1.21476
Gramd1b	2.52887e-69	0.861975	0.908	0.748	4.48066e-65	1.2139
Acadsb	0.0176436	0.28471	0.189	0.156	1	1.21154
Ptprs	4.08086e-82	0.966679	0.937	0.774	7.23047e-78	1.21059
Lmtk3	0.643122	0.322524	0.184	0.152	1	1.21053
Csrnp3	6.30938e-05	0.475291	0.415	0.343	1	1.20991
Fam20c	0.0568769	0.293091	0.157	0.13	1	1.20769
Dixdc1	1.12198e-05	0.425392	0.384	0.318	0.198793	1.20755
Sobp	4.86613e-49	0.885625	0.867	0.718	8.62181e-45	1.20752
Cpeb3	0.00400119	0.365201	0.245	0.203	1	1.2069
Fam219a	0.120088	0.349611	0.222	0.184	1	1.20652
Dvl3	0.0199777	0.384583	0.263	0.218	1	1.20642
Reep3	3.04913e-08	0.470891	0.351	0.291	0.000540246	1.20619
Rnf122	0.79035	0.25708	0.153	0.127	1	1.20472
Sgip1	6.97476e-07	0.453831	0.523	0.435	0.0123579	1.2023
Apc	3.02618e-83	0.898035	0.925	0.77	5.36178e-79	1.2013
St6gal1	4.20541e-06	0.470173	0.389	0.324	0.0745114	1.20062
Gria2	1.93212e-45	0.635935	0.88	0.733	3.42333e-41	1.20055
Gga2	0.852478	0.26422	0.168	0.14	1	1.2
Srrm4	2.87869e-29	0.708777	0.828	0.691	5.10047e-25	1.19826
Kif5c	8.99592e-27	0.628381	0.776	0.648	1.5939e-22	1.19753
Tmeff1	1.31515e-08	0.469627	0.465	0.389	0.000233018	1.19537
Osbpl9	3.1453e-08	0.461705	0.417	0.349	0.000557285	1.19484
Rab3c	5.48392e-12	0.505715	0.587	0.492	9.7164e-08	1.19309
Rnf150	0.000164805	0.419724	0.361	0.303	1	1.19142
Mbd6	0.147748	0.281799	0.189	0.159	1	1.18868
Cnksr2	5.52086e-14	0.511804	0.669	0.563	9.78186e-10	1.18828
Carmil3	0.00112488	0.362333	0.242	0.204	1	1.18627
Cers6	6.76004e-05	0.334403	0.284	0.241	1	1.17842
Bicd1	6.92217e-18	0.530585	0.642	0.545	1.22647e-13	1.17798
Nnat	0.000215461	0.440989	0.378	0.321	1	1.17757
Soga1	9.79601e-13	0.524995	0.616	0.524	1.73566e-08	1.17557
Opcml	3.11005e-07	0.385526	0.525	0.448	0.00551038	1.17187
Pcmtd2	0.0624703	0.298299	0.226	0.193	1	1.17098
Nlgn2	0.124741	0.295153	0.206	0.176	1	1.17045
Cask	2.58848e-21	0.605645	0.73	0.624	4.58627e-17	1.16987
Rorb	0.0126125	0.352521	0.194	0.166	1	1.16867
Ptprn2	1.39461e-11	0.428885	0.615	0.527	2.47098e-07	1.16698
Eml5	3.62276e-07	0.477132	0.498	0.427	0.0064188	1.16628
Gng2	6.39144e-08	0.453285	0.522	0.448	0.00113243	1.16518
Usp29	9.41423e-05	0.484797	0.453	0.389	1	1.16452
Bcl2l1	0.00132194	0.324303	0.259	0.223	1	1.16143
Arhgap44	0.0501567	0.319644	0.252	0.217	1	1.16129
Atp6v0a1	3.82211e-05	0.378429	0.368	0.317	0.677202	1.16088
Gtdc1	2.10127e-09	0.459358	0.628	0.542	3.72303e-05	1.15867
Tll1	0.00144042	0.43066	0.359	0.31	1	1.15806
Kcnh8	1.84564e-06	0.332381	0.286	0.247	0.032701	1.15789
St7	1.78904e-08	0.474744	0.625	0.54	0.000316982	1.15741
Tmem178	6.97936e-05	0.406793	0.332	0.287	1	1.15679
Scg5	0.000853492	0.388639	0.414	0.358	1	1.15642
Ppp2r2c	7.86321e-16	0.508572	0.732	0.634	1.3932e-11	1.15457
Map2	6.22081e-88	0.903258	0.96	0.832	1.1022e-83	1.15385
Gm3764	2.90268e-06	0.282436	0.353	0.306	0.0514296	1.15359
Nedd4l	8.2752e-47	0.656559	0.909	0.788	1.4662e-42	1.15355
Zfpm2	7.40792e-26	0.38752	0.797	0.691	1.31253e-21	1.1534
Ankrd12	0.00375915	0.363129	0.361	0.313	1	1.15335
Prkcb	3.93012e-52	0.675845	0.952	0.826	6.96338e-48	1.15254
Tacc2	1.27384e-06	0.326826	0.235	0.204	0.0225699	1.15196
Vezt	3.95561e-07	0.388754	0.433	0.376	0.00700856	1.1516
Cog7	5.01277e-09	0.441765	0.541	0.47	8.88163e-05	1.15106
Thra	0.0246041	0.317696	0.26	0.226	1	1.15044
Adarb2	8.73197e-13	0.573453	0.686	0.597	1.54713e-08	1.14908
Gria4	1.9108e-103	0.995215	0.965	0.84	3.38555e-99	1.14881
Ddr1	0.00025966	0.364863	0.351	0.306	1	1.14706
Gdi1	0.116484	0.317185	0.25	0.218	1	1.14679
Cep170	2.67255e-17	0.517008	0.718	0.627	4.73523e-13	1.14514
Cpeb4	0.00208331	0.286134	0.261	0.228	1	1.14474
Srgap2	4.70366e-15	0.554717	0.787	0.688	8.33395e-11	1.1439
Dlgap4	0.00185625	0.36193	0.376	0.329	1	1.14286
Trak1	2.98726e-10	0.467768	0.602	0.527	5.29284e-06	1.14231
Ebf3	1.0629e-26	0.590623	0.908	0.795	1.88324e-22	1.14214
Nmnat2	0.00127618	0.354859	0.343	0.301	1	1.13953
Kif1a	0.00878978	0.361209	0.417	0.367	1	1.13624
Gab1	0.000186898	0.407584	0.47	0.414	1	1.13527
Klf12	6.82907e-61	0.760349	0.936	0.825	1.20998e-56	1.13455
Ssbp3	2.27947e-09	0.473285	0.626	0.552	4.03876e-05	1.13406
Arhgef10l	0.0243248	0.33504	0.375	0.331	1	1.13293
Zfhx2os	0.0245204	0.339516	0.317	0.28	1	1.13214
Sema6d	1.39012e-06	0.392792	0.515	0.455	0.0246302	1.13187
Astn1	0.000301733	0.388044	0.57	0.504	1	1.13095
Hectd4	4.25265e-13	0.417905	0.572	0.506	7.53485e-09	1.13043
Gramd1a	0.172525	0.314978	0.273	0.242	1	1.1281
Clip2	0.37238	0.325163	0.292	0.259	1	1.12741
Gm49353	0.000196974	0.322908	0.302	0.268	1	1.12687
Acyp2	0.000440165	0.4194	0.329	0.292	1	1.12671
Arhgef2	0.000660152	0.369615	0.418	0.371	1	1.12668
Frmd4a	2.40606e-48	0.585177	0.937	0.832	4.26307e-44	1.1262
Afdn	1.94094e-10	0.468546	0.655	0.582	3.43896e-06	1.12543
Ubl3	0.012925	0.358921	0.297	0.264	1	1.125
Fmnl2	2.24045e-19	0.570345	0.821	0.731	3.96963e-15	1.12312
H13	2.3271e-07	0.32677	0.32	0.285	0.00412316	1.12281
Kif1b	1.1736e-18	0.518077	0.857	0.764	2.07939e-14	1.12173
Cadps	7.6828e-31	0.516661	0.899	0.802	1.36124e-26	1.12095
Astn2	2.62882e-85	0.898495	0.98	0.875	4.65775e-81	1.12
Rnf165	7.46278e-06	0.386786	0.539	0.482	0.132226	1.11826
Ctnna2	2.31312e-90	0.817891	0.984	0.88	4.09839e-86	1.11818
Fnbp1l	3.49067e-05	0.372525	0.562	0.503	0.618478	1.1173
Avl9	0.260735	0.257738	0.191	0.171	1	1.11696
Zic2	0.576196	0.282212	0.258	0.231	1	1.11688
Parp6	0.0182825	0.299112	0.268	0.24	1	1.11667
Frmd5	3.2303e-08	0.402298	0.575	0.515	0.000572345	1.1165
Tmsb4x	0.0089828	0.263007	0.221	0.198	1	1.11616
Tsga10	0.0125559	0.279895	0.231	0.207	1	1.11594
Nsg2	0.00100383	0.339436	0.377	0.338	1	1.11538
Rbfox3	7.91074e-38	0.546285	0.972	0.872	1.40163e-33	1.11468
Fstl5	0.483406	0.333229	0.195	0.175	1	1.11429
Fbxl20	0.00549259	0.320716	0.352	0.316	1	1.11392
Plxnb2	0.000151717	0.401591	0.436	0.392	1	1.11224
Jmjd1c	8.54726e-31	0.55372	0.823	0.74	1.5144e-26	1.11216
Sox5	1.79321e-18	0.454665	0.775	0.697	3.17721e-14	1.11191
Zswim5	0.0205408	0.272874	0.199	0.179	1	1.11173
Srrm3	0.00589382	0.296835	0.428	0.385	1	1.11169
Rbfox1	5.71735e-18	0.330668	0.917	0.825	1.013e-13	1.11152
Zmiz2	0.185543	0.322718	0.29	0.261	1	1.11111
Hcfc2	0.264242	0.255342	0.21	0.189	1	1.11111
Klf7	6.8737e-08	0.417222	0.611	0.55	0.00121788	1.11091
Mapt	0.163145	0.251937	0.263	0.237	1	1.1097
Zic1	2.64093e-08	0.401169	0.65	0.586	0.000467921	1.10921
Tmem178b	3.60639e-24	0.518258	0.884	0.798	6.3898e-20	1.10777
Pde1c	3.16031e-43	0.661525	0.944	0.853	5.59943e-39	1.10668
Rps6ka2	0.100153	0.28536	0.229	0.207	1	1.10628
Snap25	1.64118e-08	0.364377	0.627	0.567	0.000290785	1.10582
Reln	6.52122e-62	0.76102	0.965	0.873	1.15543e-57	1.10538
Gdpd1	0.334011	0.304756	0.252	0.228	1	1.10526
Zbtb18	0.00420623	0.316292	0.337	0.305	1	1.10492
Dmxl2	0.050577	0.345819	0.435	0.394	1	1.10406
Itsn1	2.52949e-05	0.377662	0.592	0.537	0.448175	1.10242
Ccser1	4.45475e-58	0.70093	0.961	0.872	7.89293e-54	1.10206
Snapc3	0.00665978	0.333847	0.335	0.304	1	1.10197
Hivep1	0.353159	0.315598	0.351	0.319	1	1.10031
Pcsk2	0.000120359	0.431297	0.408	0.371	1	1.09973
Kdm6b	0.00321055	0.306535	0.353	0.321	1	1.09969
Mpped2	0.00036477	0.359637	0.442	0.402	1	1.0995
Celsr3	5.56517e-05	0.331111	0.458	0.417	0.986037	1.09832
Fyn	3.09266e-08	0.28057	0.618	0.563	0.000547958	1.09769
Rufy3	3.84928e-05	0.361249	0.517	0.471	0.682016	1.09766
Nlgn1	2.04777e-16	0.369864	0.922	0.84	3.62824e-12	1.09762
B3galt1	1.15084e-24	0.528955	0.879	0.801	2.03905e-20	1.09738
Pde4d	1.5304e-65	0.771023	0.973	0.887	2.71157e-61	1.09696
Sort1	0.00252063	0.273041	0.24	0.219	1	1.09589
Maml3	5.17294e-45	0.679124	0.96	0.878	9.16541e-41	1.09339
Zfp385b	1.96677e-07	0.430872	0.552	0.505	0.00348472	1.09307
Ank2	3.49651e-47	0.619236	0.975	0.892	6.19512e-43	1.09305
Erbb4	7.79207e-132	1.1061	0.992	0.908	1.3806e-127	1.09251
Phf20l1	1.69189e-07	0.404589	0.617	0.565	0.0029977	1.09204
Jakmip2	0.00050608	0.356475	0.475	0.435	1	1.09195
Ube2h	0.000209982	0.312952	0.385	0.353	1	1.09065
Klhl24	0.0025628	0.289199	0.303	0.278	1	1.08993
Celsr2	0.129739	0.30179	0.438	0.402	1	1.08955
Cd9	0.19306	0.303244	0.28	0.257	1	1.08949
Trio	1.69328e-22	0.438132	0.794	0.729	3.00015e-18	1.08916
Cpe	1.31034e-06	0.342861	0.501	0.46	0.0232166	1.08913
Foxp1	3.62102e-14	0.430609	0.823	0.756	6.41572e-10	1.08862
Galnt17	0.0666232	0.327969	0.456	0.419	1	1.08831
Snx29	0.000642636	0.355343	0.486	0.447	1	1.08725
Senp7	0.000446068	0.316957	0.449	0.414	1	1.08454
Nrxn1	1.92274e-46	0.488963	0.988	0.911	3.4067e-42	1.08452
Nol4	2.59518e-21	0.406383	0.858	0.792	4.59814e-17	1.08333
Atp1b3	0.016353	0.301205	0.26	0.24	1	1.08333
Ulk2	0.0539487	0.317563	0.313	0.289	1	1.08304
Polb	0.030907	0.255294	0.236	0.218	1	1.08257
Dctn1	0.352692	0.251762	0.226	0.209	1	1.08134
Ebf1	2.59139e-41	0.589005	0.974	0.901	4.59142e-37	1.08102
Scn8a	3.73966e-09	0.359129	0.697	0.645	6.62593e-05	1.08062
Aff3	2.02479e-16	0.372711	0.805	0.745	3.58753e-12	1.08054
Arhgap21	1.98247e-09	0.378819	0.7	0.648	3.51255e-05	1.08025
Arhgef7	0.00256253	0.352967	0.459	0.425	1	1.08
Zswim6	5.94469e-08	0.347448	0.504	0.467	0.00105328	1.07923
App	5.873e-20	0.435194	0.816	0.757	1.04058e-15	1.07794
Ank3	1.19691e-149	1.06054	0.994	0.923	2.12069e-145	1.07692
Tmod2	0.146412	0.276559	0.31	0.288	1	1.07639
Fgf13	6.46057e-06	0.336677	0.624	0.58	0.114468	1.07586
Pag1	0.0232993	0.322621	0.344	0.32	1	1.075
Tcaf1	0.149273	0.303756	0.366	0.341	1	1.07331
Exoc6b	7.04147e-09	0.293088	0.631	0.588	0.000124761	1.07313
Dapk1	7.99957e-05	0.320289	0.535	0.499	1	1.07214
Ppm1l	0.00133541	0.310392	0.495	0.462	1	1.07143
Ttc3	3.53234e-21	0.399649	0.859	0.802	6.25861e-17	1.07107
Peli2	1.23522e-05	0.426473	0.71	0.663	0.218857	1.07089
Kdm1a	0.00524926	0.313223	0.467	0.437	1	1.06865
Thsd7a	9.02472e-15	0.314609	0.874	0.818	1.599e-10	1.06846
Clasp2	8.81269e-08	0.353687	0.673	0.63	0.00156143	1.06825
Trp53bp1	0.0024152	0.320342	0.424	0.397	1	1.06801
Rtn4	1.98187e-06	0.335781	0.527	0.494	0.0351148	1.0668
Stard9	0.00885712	0.251076	0.324	0.304	1	1.06579
Mfhas1	0.0994068	0.291587	0.262	0.246	1	1.06504
Nav1	3.17947e-19	0.401525	0.907	0.853	5.63339e-15	1.06331
Park2	0.00251106	0.31213	0.392	0.369	1	1.06233
Gm38399	0.000109577	0.279996	0.696	0.656	1	1.06098
Ppp3ca	1.33241e-17	0.409299	0.838	0.79	2.36077e-13	1.06076
Dpysl2	2.1235e-05	0.306673	0.514	0.485	0.376243	1.05979
Grik2	4.75956e-69	0.690048	0.995	0.94	8.43299e-65	1.05851
Sufu	0.0805899	0.299221	0.455	0.43	1	1.05814
Gsk3b	2.12297e-07	0.31472	0.718	0.68	0.00376147	1.05588
Cald1	1.85035e-06	0.281865	0.435	0.412	0.0327845	1.05582
Nbea	1.58035e-12	0.303587	0.89	0.843	2.80007e-08	1.05575
Dync1i2	0.000961694	0.272397	0.443	0.42	1	1.05476
Fbxo11	1.63396e-06	0.314071	0.566	0.537	0.0289506	1.054
Riok3	0.0154161	0.272116	0.294	0.279	1	1.05376
Hunk	0.662886	0.260049	0.219	0.208	1	1.05288
Tmcc1	0.000157985	0.313406	0.603	0.573	1	1.05236
Fzd3	0.00288635	0.275058	0.383	0.364	1	1.0522
Nav2	7.95296e-144	1.01408	0.999	0.95	1.40911e-139	1.05158
Scg3	0.174476	0.257615	0.306	0.291	1	1.05155
Lsamp	1.28202e-17	0.366852	0.971	0.924	2.27148e-13	1.05087
Nfix	2.51503e-06	0.289821	0.875	0.834	0.0445613	1.04916
Myo18a	0.0213501	0.252632	0.261	0.249	1	1.04819
Klhl7	0.200669	0.270505	0.493	0.471	1	1.04671
Ppp6r2	0.0744974	0.260349	0.338	0.323	1	1.04644
Fgd4	0.00362322	0.289005	0.552	0.528	1	1.04545
Rb1cc1	0.00686714	0.259111	0.404	0.387	1	1.04393
Rere	7.70099e-15	0.350271	0.904	0.866	1.36446e-10	1.04388
Psme4	6.13213e-05	0.283459	0.701	0.672	1	1.04315
Mex3a	0.0155838	0.278394	0.437	0.419	1	1.04296
Bach2	1.37969e-06	0.281775	0.691	0.663	0.0244453	1.04223
Celf2	7.90098e-121	0.875899	0.999	0.959	1.3999e-116	1.04171
Flna	2.60733e-05	0.283299	0.575	0.552	0.461966	1.04167
Setbp1	1.74139e-37	0.415698	0.981	0.942	3.0854e-33	1.0414
Gnaq	1.39293e-08	0.296006	0.711	0.683	0.0002468	1.041
Smarcc2	8.63505e-05	0.298564	0.517	0.497	1	1.04024
Phf14	2.345e-06	0.293759	0.65	0.625	0.0415488	1.04
Csnk1g1	0.0201048	0.271207	0.444	0.427	1	1.03981
Clstn1	0.195627	0.262066	0.355	0.342	1	1.03801
Pbx1	5.02197e-14	0.334995	0.894	0.862	8.89793e-10	1.03712
Anks1	0.00230209	0.277401	0.339	0.327	1	1.0367
Soga3	0.00131745	0.263915	0.465	0.449	1	1.03563
Zfp608	9.58355e-08	0.307861	0.64	0.618	0.00169801	1.0356
Scaper	0.00192237	0.280862	0.413	0.399	1	1.03509
Enah	0.0219642	0.315404	0.564	0.545	1	1.03486
Chd7	5.5804e-33	0.433124	0.983	0.95	9.88735e-29	1.03474
Spag9	2.37272e-07	0.334449	0.686	0.663	0.00420398	1.03469
Cacna2d1	1.38547e-120	0.82397	0.999	0.967	2.45478e-116	1.03309
Hook3	0.21354	0.262467	0.57	0.552	1	1.03261
Clasp1	1.73374e-05	0.265417	0.71	0.688	0.307185	1.03198
Rbfox2	8.51835e-06	0.29962	0.747	0.725	0.150928	1.03034
Kmt2e	4.34876e-05	0.295357	0.719	0.7	0.770513	1.02714
Ttc28	0.000232942	0.276684	0.667	0.651	1	1.02458
Plekha5	3.54611e-05	0.263683	0.583	0.57	0.6283	1.02281
Auts2	2.78272e-44	0.454342	0.993	0.971	4.93042e-40	1.02266
Kalrn	0.0209998	0.263126	0.547	0.535	1	1.02243
Stau2	0.146687	0.252879	0.446	0.438	1	1.01826
Ppm1e	0.0335332	0.259214	0.515	0.509	1	1.01179
Nfib	5.92667e-61	0.438355	1	0.991	1.05009e-56	1.00908
Tcf4	5.60385e-39	0.3757	0.996	0.989	9.92889e-35	1.00708
Ptprd	5.57718e-14	-0.266853	0.948	0.957	9.88164e-10	0.990596
mt-Rnr2	3.26314e-39	-0.495464	0.979	0.995	5.78162e-35	0.983919
mt-Rnr1	5.19227e-35	-0.491552	0.977	0.993	9.19967e-31	0.983887
Cmss1	7.83216e-13	-0.47035	0.922	0.955	1.3877e-08	0.965445
Zeb1	2.59029e-21	-0.496334	0.911	0.944	4.58947e-17	0.965042
Fam155a	1.07279e-15	-0.457662	0.859	0.894	1.90077e-11	0.96085
Gm42418	2.33638e-12	-0.364398	0.868	0.914	4.1396e-08	0.949672
Cadps2	0.299045	-0.269535	0.428	0.457	1	0.936542
Rora	7.73338e-12	-0.336354	0.86	0.926	1.3702e-07	0.928726
Gse1	7.77838e-18	-0.437818	0.768	0.838	1.37817e-13	0.916468
Map4k4	8.02068e-13	-0.39938	0.784	0.869	1.4211e-08	0.902186
Zmiz1	1.12012e-13	-0.46547	0.762	0.852	1.98463e-09	0.894366
Stag1	1.0918e-09	-0.281858	0.686	0.775	1.93444e-05	0.885161
Cacng2	0.00368298	-0.256774	0.569	0.648	1	0.878086
Grip1	7.33116e-10	-0.379219	0.735	0.838	1.29893e-05	0.877088
Cntnap2	0.000939368	-0.34415	0.526	0.601	1	0.875208
Magi2	3.88706e-12	-0.43202	0.748	0.859	6.8871e-08	0.87078
Kcnh7	1.11578e-12	-0.686609	0.693	0.796	1.97695e-08	0.870603
Cacna1e	0.613471	-0.472097	0.262	0.306	1	0.856209
Lrrc7	2.53105e-34	-0.687115	0.743	0.87	4.48452e-30	0.854023
Hs3st5	2.37936e-22	-0.538236	0.677	0.793	4.21576e-18	0.85372
Rbm25	7.6356e-05	-0.270738	0.664	0.778	1	0.85347
Huwe1	1.91101e-08	-0.314749	0.659	0.78	0.000338593	0.844872
Cecr2	3.99001e-07	-0.313827	0.581	0.691	0.0070695	0.84081
Tmeff2	3.44425e-05	-0.403389	0.564	0.674	0.610253	0.836795
Zeb2	2.73542e-09	-0.337117	0.599	0.717	4.84662e-05	0.835425
Nedd4	1.31575e-16	-0.420537	0.677	0.812	2.33125e-12	0.833744
Ankrd11	4.46231e-10	-0.289095	0.601	0.722	7.90633e-06	0.83241
Mdga1	2.53324e-10	-0.327025	0.556	0.668	4.48839e-06	0.832335
Prrc2c	6.62476e-07	-0.271735	0.612	0.736	0.0117377	0.831522
Dlgap1	0.000327522	-0.253471	0.505	0.608	1	0.830592
Fry	2.75451e-07	-0.36266	0.504	0.612	0.00488044	0.823529
Pak3	0.018683	-0.264792	0.507	0.617	1	0.821718
Cux1	1.32782e-07	-0.341643	0.572	0.698	0.00235263	0.819484
Slc1a2	9.05049e-08	-0.335492	0.514	0.628	0.00160357	0.818471
Gm26917	6.86889e-11	-0.466052	0.54	0.66	1.21703e-06	0.818182
Eif4g3	2.53069e-05	-0.319786	0.575	0.705	0.448387	0.815603
Foxn3	7.53219e-10	-0.289376	0.557	0.686	1.33455e-05	0.811953
Cntn1	0.196476	-0.265162	0.154	0.191	1	0.806282
Hnrnpu	2.08922e-15	-0.447272	0.607	0.753	3.70169e-11	0.806109
Foxp2	2.89637e-24	-0.64954	0.664	0.829	5.13179e-20	0.800965
Robo1	6.42457e-07	-0.322515	0.456	0.573	0.0113831	0.795811
Hnrnpa2b1	1.20285e-13	-0.451697	0.588	0.742	2.13121e-09	0.792453
Rsrc1	1.73918e-05	-0.262293	0.465	0.591	0.308149	0.786802
Fut8	3.59767e-11	-0.408702	0.535	0.681	6.37436e-07	0.785609
Zfp704	5.81932e-20	-0.531384	0.552	0.705	1.03107e-15	0.782979
Sipa1l3	1.14229e-20	-0.519745	0.539	0.692	2.02391e-16	0.778902
Tmem131	0.000353543	-0.301744	0.464	0.597	1	0.777219
Mbnl2	4.11139e-08	-0.341546	0.444	0.578	0.000728457	0.768166
Fus	2.87446e-11	-0.29197	0.473	0.616	5.09296e-07	0.767857
Cdh20	1.0164e-106	-1.54082	0.693	0.903	1.80086e-102	0.767442
Tle1	3.10212e-12	-0.298551	0.415	0.541	5.49633e-08	0.767098
Dhx9	6.75356e-08	-0.261631	0.418	0.548	0.0011966	0.762774
Arhgef12	0.000984359	-0.261169	0.398	0.522	1	0.762452
Ptprg	2.33284e-49	-1.09048	0.647	0.849	4.13332e-45	0.762073
Tshz2	2.6647e-26	-0.763677	0.591	0.778	4.72132e-22	0.75964
Ezh2	1.4356e-08	-0.299236	0.414	0.546	0.00025436	0.758242
Smarcc1	3.87273e-08	-0.290573	0.435	0.576	0.00068617	0.755208
Wwox	6.85646e-10	-0.351639	0.495	0.656	1.21483e-05	0.754573
Rnf220	3.67975e-33	-0.961448	0.536	0.715	6.51979e-29	0.74965
Dyrk1a	9.27161e-11	-0.356765	0.43	0.574	1.64274e-06	0.749129
Exoc2	5.93069e-09	-0.340286	0.369	0.494	0.00010508	0.746963
Hs6st3	2.98892e-06	-0.370265	0.356	0.478	0.0529577	0.74477
Maml2	3.37233e-25	-0.667257	0.596	0.802	5.9751e-21	0.743142
Dlg2	4.46437e-05	-0.432966	0.25	0.337	0.790997	0.74184
Smyd3	2.61985e-07	-0.348019	0.402	0.544	0.00464185	0.73897
Dpp6	4.33951e-07	-0.441987	0.291	0.394	0.00768875	0.738578
Pds5b	1.03979e-15	-0.39787	0.454	0.621	1.84231e-11	0.731079
Filip1l	1.1243e-06	-0.348843	0.326	0.446	0.0199203	0.730942
Srek1	2.79505e-09	-0.379202	0.437	0.598	4.95227e-05	0.730769
Stag2	5.90327e-07	-0.278931	0.371	0.508	0.0104594	0.730315
Luzp2	4.49193e-08	-0.394043	0.173	0.237	0.000795881	0.729957
Barhl1	0.000529531	-0.277764	0.291	0.4	1	0.7275
Pds5a	1.62289e-12	-0.373561	0.407	0.56	2.87544e-08	0.726786
Zfr	2.64765e-07	-0.257836	0.34	0.468	0.00469111	0.726496
Syncrip	2.83006e-09	-0.327326	0.394	0.543	5.0143e-05	0.725598
Lpp	1.25788e-06	-0.287651	0.348	0.48	0.0222872	0.725
Tcerg1	3.07447e-11	-0.302041	0.371	0.512	5.44734e-07	0.724609
Ryr2	0.000686361	-0.417733	0.128	0.177	1	0.723163
Eif4g1	3.23066e-08	-0.331695	0.383	0.531	0.000572408	0.72128
Naaladl2	6.67146e-08	-0.270898	0.304	0.423	0.00118205	0.718676
Pard3	8.97007e-25	-0.578	0.5	0.698	1.58932e-20	0.716332
Ivns1abp	1.36356e-14	-0.322086	0.332	0.465	2.41595e-10	0.713978
Slc10a7	1.47102e-08	-0.264789	0.298	0.418	0.000260636	0.712918
Aff2	3.02311e-05	-0.271028	0.3	0.421	0.535635	0.712589
Uhrf2	1.4568e-13	-0.349278	0.357	0.502	2.58115e-09	0.711155
Ntn1	1.02946e-24	-0.685651	0.488	0.688	1.824e-20	0.709302
Baz1b	1.56914e-11	-0.365907	0.375	0.529	2.78019e-07	0.708885
Magi3	7.18079e-09	-0.338458	0.341	0.482	0.000127229	0.707469
Snd1	3.21455e-10	-0.358698	0.376	0.532	5.69554e-06	0.706767
Npas3	2.31177e-12	-0.595314	0.337	0.478	4.09599e-08	0.705021
Trim24	7.71239e-07	-0.252354	0.301	0.427	0.0136648	0.704918
Rbbp6	7.60419e-10	-0.293202	0.329	0.467	1.34731e-05	0.704497
Atp2b1	3.46351e-12	-0.370564	0.374	0.531	6.13665e-08	0.704331
Farp1	5.28791e-09	-0.286033	0.307	0.436	9.36911e-05	0.704128
Fgf12	0.000207431	-0.314065	0.305	0.434	1	0.702765
Smchd1	9.10586e-09	-0.390651	0.37	0.528	0.000161338	0.700757
Asxl2	2.6445e-06	-0.303394	0.316	0.451	0.0468553	0.700665
Tardbp	4.62844e-06	-0.251858	0.285	0.407	0.0820066	0.700246
Dlg1	4.72078e-05	-0.277477	0.303	0.433	0.836428	0.699769
Gm20388	2.18922e-15	-0.473676	0.417	0.596	3.87886e-11	0.699664
Efna5	8.81407e-19	-0.49213	0.377	0.54	1.56168e-14	0.698148
Brd8	2.95969e-09	-0.327511	0.296	0.424	5.24398e-05	0.698113
Srsf3	9.42267e-08	-0.251995	0.282	0.404	0.00166951	0.69802
Qk	1.74055e-24	-0.689738	0.438	0.628	3.0839e-20	0.697452
Mib1	7.19341e-11	-0.383007	0.353	0.507	1.27453e-06	0.696252
Rai1	2.77215e-24	-0.590696	0.465	0.669	4.9117e-20	0.695067
Srrm1	2.41023e-09	-0.32635	0.323	0.465	4.27044e-05	0.694624
Tmem163	9.56202e-25	-0.9746	0.452	0.651	1.6942e-20	0.694316
Large1	4.14625e-10	-0.397829	0.392	0.565	7.34633e-06	0.693805
Cdk6	2.02284e-60	-1.06494	0.559	0.807	3.58408e-56	0.692689
Xpo6	5.80986e-10	-0.250321	0.241	0.348	1.02939e-05	0.692529
Dleu2	0.000546492	-0.333126	0.333	0.482	1	0.690871
Tbc1d5	3.72084e-11	-0.329211	0.324	0.469	6.59259e-07	0.690831
Zfp91	1.99261e-09	-0.292773	0.29	0.421	3.5305e-05	0.688836
Ncald	1.6226e-09	-0.495794	0.363	0.527	2.87492e-05	0.688804
Eprs	9.49013e-11	-0.260916	0.27	0.392	1.68146e-06	0.688775
Bmpr1a	2.09945e-09	-0.29426	0.298	0.433	3.71981e-05	0.688222
Hnrnpr	1.92528e-08	-0.339815	0.32	0.465	0.000341122	0.688172
Lcorl	2.44921e-08	-0.370592	0.339	0.493	0.000433952	0.687627
Hnrnpul1	2.82781e-08	-0.283738	0.277	0.403	0.000501031	0.687345
Itgb1	3.47393e-08	-0.251296	0.268	0.39	0.000615511	0.687179
Ptch1	5.43669e-91	-1.55581	0.566	0.824	9.63272e-87	0.686893
Frmd4b	8.42554e-55	-1.13072	0.516	0.752	1.49284e-50	0.68617
Slc29a1	0.000501931	-0.333832	0.268	0.392	1	0.683673
Hdac4	2.00622e-10	-0.39957	0.358	0.524	3.55462e-06	0.683206
Atp2a2	2.19877e-07	-0.267492	0.278	0.407	0.00389579	0.683047
Tlk1	4.45888e-06	-0.310842	0.293	0.429	0.0790023	0.682984
Rgs7	3.08782e-08	-0.252171	0.17	0.249	0.0005471	0.682731
Ranbp17	4.86668e-10	-0.331239	0.308	0.452	8.62279e-06	0.681416
Bcl11a	1.38899e-07	-0.348846	0.295	0.433	0.00246101	0.681293
Robo2	9.54819e-55	-1.10213	0.547	0.803	1.69175e-50	0.681195
Purb	4.45444e-12	-0.283011	0.26	0.382	7.89237e-08	0.680628
Tenm1	0.000222878	-0.382547	0.153	0.225	1	0.68
Zfhx3	6.13933e-28	-0.583856	0.435	0.64	1.08777e-23	0.679687
Cdkal1	5.0823e-20	-0.572971	0.429	0.632	9.00482e-16	0.678797
Ddx3x	1.67578e-14	-0.371024	0.336	0.495	2.96915e-10	0.678788
Cdk5rap2	1.59956e-16	-0.444694	0.338	0.499	2.83409e-12	0.677355
Rock2	1.25742e-09	-0.324441	0.302	0.446	2.22789e-05	0.67713
Cdk17	2.33402e-06	-0.251623	0.236	0.349	0.0413541	0.676218
Atp13a3	1.42626e-07	-0.290611	0.271	0.401	0.00252704	0.67581
Chchd3	2.93248e-06	-0.353989	0.325	0.482	0.0519577	0.674274
Fam120a	2.43096e-15	-0.368267	0.325	0.484	4.30718e-11	0.671487
Naa15	1.97303e-11	-0.323062	0.29	0.432	3.49582e-07	0.671296
Tra2a	3.572e-05	-0.340229	0.308	0.459	0.632888	0.671024
Fxr1	6.32552e-10	-0.269046	0.268	0.4	1.12076e-05	0.67
Ppp4r3a	4.79874e-05	-0.25418	0.236	0.353	0.85024	0.668555
Arhgap32	6.63278e-12	-0.330105	0.279	0.419	1.1752e-07	0.665871
Ankrd28	2.80074e-10	-0.293487	0.243	0.365	4.96235e-06	0.665753
Zc3h12c	0.000557047	-0.270712	0.223	0.335	1	0.665671
Adgra3	6.02737e-12	-0.258742	0.211	0.317	1.06793e-07	0.665615
Usp24	4.87459e-06	-0.32353	0.276	0.415	0.0863679	0.66506
Hnrnpdl	3.92243e-08	-0.307574	0.272	0.409	0.000694976	0.665037
Xpo1	1.94589e-13	-0.434681	0.341	0.513	3.44773e-09	0.664717
Phf21b	9.37886e-10	-0.382225	0.285	0.429	1.66175e-05	0.664336
Mdn1	5.8691e-11	-0.307388	0.278	0.419	1.03989e-06	0.663484
Mpp7	1.50128e-06	-0.251888	0.241	0.364	0.0265997	0.662088
mt-Cytb	1.7432e-11	-0.320347	0.287	0.434	3.08861e-07	0.66129
Rev1	4.81633e-12	-0.277661	0.245	0.371	8.53358e-08	0.660377
Fam135a	0.000766741	-0.265062	0.245	0.371	1	0.660377
Stk3	2.11618e-10	-0.362692	0.299	0.453	3.74944e-06	0.660044
Sacs	6.68734e-15	-0.479876	0.329	0.5	1.18486e-10	0.658
Fancc	4.99108e-09	-0.271561	0.228	0.347	8.8432e-05	0.65706
Ubap2	8.77915e-10	-0.30318	0.254	0.387	1.55549e-05	0.656331
Arhgap5	6.91118e-05	-0.271925	0.217	0.331	1	0.655589
Eml4	2.90252e-11	-0.334224	0.276	0.421	5.14268e-07	0.655582
H2afy	1.93491e-10	-0.30522	0.247	0.377	3.42827e-06	0.655172
Pcf11	7.95269e-09	-0.265678	0.198	0.303	0.000140906	0.653465
Mcmbp	3.46678e-08	-0.275766	0.212	0.325	0.000614244	0.652307
Mical3	1.01481e-07	-0.252476	0.195	0.299	0.00179803	0.652174
Slc8a1	7.2014e-10	-0.35965	0.202	0.31	1.27594e-05	0.651613
Babam2	1.64912e-08	-0.3248	0.276	0.424	0.000292191	0.650943
mt-Co1	2.23367e-08	-0.288811	0.22	0.338	0.000395762	0.650887
Prpf39	2.1174e-10	-0.282078	0.228	0.353	3.75162e-06	0.645892
Glcci1	2.33534e-09	-0.281762	0.195	0.302	4.13775e-05	0.645695
Brd3	2.69744e-07	-0.264709	0.217	0.337	0.00477932	0.643917
Eif3a	6.83037e-13	-0.484685	0.334	0.519	1.2102e-08	0.643545
Nxph1	0.000434395	-0.335942	0.117	0.182	1	0.642857
Sdk1	4.10083e-32	-0.964986	0.446	0.694	7.26585e-28	0.642651
Cenpc1	5.29485e-05	-0.255567	0.203	0.316	0.938141	0.642405
Trerf1	8.39849e-13	-0.307974	0.256	0.399	1.48805e-08	0.641604
Sipa1l2	6.59222e-12	-0.438381	0.245	0.382	1.16801e-07	0.641361
Apbb2	1.76229e-07	-0.382813	0.2	0.312	0.00312243	0.641025
Btaf1	6.4688e-11	-0.293958	0.228	0.356	1.14614e-06	0.640449
Ptma	1.69891e-07	-0.388109	0.243	0.38	0.00301013	0.639474
Prpf38b	6.00308e-08	-0.266112	0.214	0.335	0.00106363	0.638806
Thrap3	5.82253e-10	-0.407805	0.297	0.465	1.03164e-05	0.63871
Ano6	1.07814e-09	-0.282423	0.205	0.321	1.91025e-05	0.638629
Smc5	9.4673e-09	-0.353224	0.268	0.42	0.000167742	0.638095
Uri1	2.87965e-07	-0.267017	0.199	0.312	0.00510216	0.63782
Canx	2.62288e-12	-0.356133	0.243	0.384	4.64722e-08	0.632812
Alms1	9.53448e-09	-0.352637	0.25	0.396	0.000168932	0.631313
Smc1a	5.39075e-16	-0.37224	0.259	0.411	9.55133e-12	0.63017
Tbl1xr1	1.39412e-12	-0.396268	0.282	0.448	2.4701e-08	0.629464
Fhit	1.70527e-09	-0.395669	0.191	0.304	3.02141e-05	0.628289
Asxl1	1.31605e-15	-0.437051	0.267	0.425	2.33178e-11	0.628235
Usp6nl	1.28294e-07	-0.268976	0.167	0.266	0.00227312	0.627819
Brip1os	8.01544e-06	-0.256947	0.177	0.282	0.142018	0.627659
Gm47283	3.04416e-23	-0.687127	0.34	0.542	5.39365e-19	0.627306
Hip1	3.81094e-08	-0.358862	0.2	0.319	0.000675222	0.626959
Scaf11	7.90457e-16	-0.359687	0.247	0.394	1.40053e-11	0.626903
Yy1	4.35793e-09	-0.251125	0.173	0.276	7.72139e-05	0.626811
Lyst	5.94201e-08	-0.289298	0.203	0.324	0.00105281	0.626543
G2e3	3.38495e-10	-0.428214	0.223	0.356	5.99746e-06	0.626404
Rasal2	3.46549e-08	-0.431066	0.278	0.445	0.000614015	0.624719
mt-Nd5	1.0263e-09	-0.388432	0.258	0.413	1.81839e-05	0.624697
Nalcn	8.38751e-23	-0.71822	0.345	0.553	1.4861e-18	0.62387
Slk	3.88612e-07	-0.265161	0.172	0.276	0.00688543	0.623188
Dpysl4	2.34039e-08	-0.276031	0.167	0.268	0.000414671	0.623134
Srsf5	1.10975e-07	-0.276128	0.195	0.313	0.00196625	0.623003
Ncl	7.27206e-30	-0.645488	0.356	0.572	1.28846e-25	0.622378
Sf1	5.59209e-16	-0.362771	0.248	0.399	9.90807e-12	0.621554
Slc39a10	7.2187e-05	-0.282472	0.141	0.227	1	0.621145
Eef1a1	2.01543e-13	-0.399924	0.234	0.377	3.57093e-09	0.620689
Supt3	2.36402e-06	-0.294378	0.191	0.308	0.0418857	0.62013
Gls	3.22205e-09	-0.324783	0.218	0.353	5.70883e-05	0.617564
Mthfd1l	1.45576e-10	-0.281444	0.185	0.3	2.57932e-06	0.616666
Ski	6.10795e-15	-0.394328	0.246	0.399	1.08221e-10	0.616541
Hnrnpl	1.04464e-16	-0.392626	0.247	0.401	1.85088e-12	0.61596
E2f3	9.33962e-14	-0.404356	0.253	0.411	1.65479e-09	0.615572
Mier1	2.5161e-14	-0.305728	0.192	0.312	4.45802e-10	0.615384
Chka	1.26154e-08	-0.263085	0.169	0.275	0.000223519	0.614545
Rassf3	7.79914e-22	-0.635382	0.349	0.569	1.38185e-17	0.613357
Nrf1	2.35579e-12	-0.436926	0.26	0.424	4.17398e-08	0.613207
Tbc1d16	1.06482e-22	-0.615876	0.327	0.534	1.88664e-18	0.612359
Larp1	2.38134e-08	-0.328234	0.205	0.335	0.000421926	0.61194
Lmnb1	2.42841e-12	-0.440641	0.238	0.389	4.30265e-08	0.611825
Bahcc1	4.36879e-16	-0.682391	0.319	0.522	7.74062e-12	0.611111
Grid2ip	5.00855e-05	-0.323799	0.157	0.257	0.887415	0.610895
Hnrnpa1	4.63714e-09	-0.326643	0.196	0.321	8.21608e-05	0.610592
Lrrc4c	4.76804e-05	-0.957164	0.125	0.205	0.844801	0.609756
Chd1	2.89503e-11	-0.332308	0.209	0.343	5.12942e-07	0.609329
Epha7	5.40433e-10	-0.254769	0.151	0.248	9.57539e-06	0.608871
Ipo11	2.65028e-09	-0.376846	0.224	0.368	4.69576e-05	0.608695
Zfp462	2.40582e-22	-0.644685	0.339	0.558	4.26263e-18	0.607527
Sh3d19	4.11352e-08	-0.29161	0.134	0.221	0.000728834	0.606335
Nxpe4	1.37793e-10	-0.416641	0.226	0.373	2.44141e-06	0.605898
Utrn	2.70576e-11	-0.55961	0.215	0.355	4.79406e-07	0.605634
Hspa4	7.96785e-14	-0.268572	0.173	0.286	1.41174e-09	0.604895
Srsf4	2.4776e-08	-0.326301	0.194	0.321	0.00043898	0.604361
Phactr4	2.15148e-08	-0.251211	0.16	0.266	0.000381199	0.601504
Ccnl1	1.50325e-11	-0.292884	0.172	0.286	2.66345e-07	0.601398
Sfrp1	3.82525e-21	-0.656692	0.293	0.488	6.77758e-17	0.60041
Wdpcp	9.40682e-13	-0.366551	0.201	0.335	1.6667e-08	0.6
Srsf6	1.81047e-07	-0.291168	0.174	0.29	0.0032078	0.6
Ckap5	6.60538e-25	-0.620292	0.269	0.449	1.17034e-20	0.599109
Hnrnpd	3.08369e-24	-0.459746	0.263	0.439	5.46368e-20	0.599089
Spata5	4.55316e-14	-0.382537	0.221	0.369	8.06729e-10	0.598916
Serbp1	1.36491e-15	-0.515669	0.276	0.462	2.41835e-11	0.597402
Peak1	1.80744e-16	-0.384929	0.23	0.385	3.20242e-12	0.597402
Eif4a2	6.23787e-13	-0.333989	0.191	0.32	1.10523e-08	0.596875
Ftx	4.11853e-07	-0.254348	0.146	0.245	0.00729721	0.595918
N4bp2	2.45179e-09	-0.32595	0.196	0.329	4.34409e-05	0.595744
Ncor2	2.92342e-96	-1.45678	0.492	0.826	5.17972e-92	0.595642
Hnrnpa3	2.93885e-13	-0.33848	0.19	0.319	5.20705e-09	0.595611
Shroom4	3.2812e-10	-0.268436	0.134	0.225	5.81363e-06	0.595555
Kpnb1	5.55207e-10	-0.329489	0.187	0.314	9.83715e-06	0.595541
Pam	2.98727e-11	-0.326013	0.185	0.311	5.29285e-07	0.594855
Kcnq5	5.53038e-28	-0.956185	0.317	0.533	9.79873e-24	0.594747
Srbd1	5.45633e-08	-0.287489	0.186	0.313	0.000966752	0.594249
Rai14	4.00263e-10	-0.374173	0.203	0.342	7.09185e-06	0.593567
Prkca	3.55353e-06	-0.296274	0.127	0.214	0.0629615	0.593458
Sin3a	8.25221e-09	-0.29429	0.163	0.275	0.000146213	0.592727
Gspt1	7.30194e-13	-0.295353	0.181	0.306	1.29376e-08	0.591503
L3mbtl3	1.6537e-06	-0.304783	0.146	0.247	0.0293003	0.591093
Ghr	1.39513e-08	-0.454197	0.173	0.293	0.00024719	0.590443
Zdbf2	1.05462e-07	-0.26636	0.148	0.251	0.00186858	0.589641
C1ql1	0.00220534	-0.25107	0.11	0.187	1	0.588235
Sfmbt1	8.13878e-13	-0.42968	0.231	0.393	1.44203e-08	0.587786
Nup153	3.00612e-11	-0.416596	0.215	0.366	5.32625e-07	0.587432
mt-Nd1	1.11985e-06	-0.304138	0.156	0.266	0.0198415	0.586466
Ttll4	2.05884e-08	-0.31022	0.174	0.297	0.000364785	0.585858
Tmem164	5.52021e-15	-0.387757	0.202	0.345	9.7807e-11	0.585507
Ccnjl	1.35864e-10	-0.272156	0.132	0.226	2.40724e-06	0.584071
Otud4	2.41431e-13	-0.383882	0.206	0.353	4.27768e-09	0.583569
Snx25	4.00481e-08	-0.292925	0.154	0.264	0.000709573	0.583333
Rttn	1.72256e-06	-0.259544	0.155	0.266	0.0305203	0.582707
Adamts6	2.63495e-18	-0.678294	0.299	0.514	4.6686e-14	0.581712
Nap1l1	2.8594e-13	-0.422889	0.21	0.362	5.06628e-09	0.58011
Wdr43	7.82412e-10	-0.37059	0.196	0.338	1.38628e-05	0.579881
Atp8a1	8.51895e-16	-0.45322	0.233	0.402	1.50939e-11	0.579602
Eif4a1	3.21664e-08	-0.31753	0.158	0.273	0.000569925	0.578754
Gtf3c1	9.36635e-22	-0.587167	0.254	0.439	1.65953e-17	0.578588
Neto2	2.68524e-11	-0.302122	0.148	0.256	4.75771e-07	0.578125
Sp1	6.39161e-07	-0.269183	0.141	0.244	0.0113247	0.577869
Gatad2a	8.56038e-06	-0.253932	0.131	0.227	0.151673	0.577092
Ptbp1	7.72297e-09	-0.343208	0.165	0.286	0.000136836	0.576923
Gmds	2.89692e-12	-0.414909	0.199	0.346	5.13276e-08	0.575144
Raly	5.72651e-12	-0.393486	0.199	0.346	1.01462e-07	0.575144
Nup205	8.6259e-15	-0.297472	0.158	0.275	1.52834e-10	0.574545
Cnot10	1.08596e-09	-0.25185	0.144	0.251	1.92411e-05	0.573705
Gng12	1.88656e-17	-0.412701	0.215	0.375	3.3426e-13	0.573333
Stx6	7.84444e-14	-0.421745	0.2	0.349	1.38988e-09	0.573066
Prkag2	1.28258e-08	-0.401677	0.154	0.269	0.000227248	0.57249
Akap13	3.07157e-18	-0.606074	0.265	0.463	5.44221e-14	0.572354
Rfc1	1.55558e-13	-0.397572	0.186	0.325	2.75618e-09	0.572308
Gm2694	5.30876e-10	-0.370928	0.171	0.299	9.40606e-06	0.571906
Ntrk3	2.81589e-117	-1.7997	0.48	0.84	4.98919e-113	0.571429
Kcnma1	2.96376e-09	-0.693283	0.209	0.366	5.2512e-05	0.571038
Ssr1	8.1941e-13	-0.260177	0.133	0.233	1.45183e-08	0.570815
Dcbld2	4.61171e-08	-0.277607	0.133	0.233	0.000817104	0.570815
Senp1	8.32785e-10	-0.301548	0.151	0.265	1.47553e-05	0.569811
Lin52	1.21936e-11	-0.283347	0.147	0.258	2.16046e-07	0.569767
Zdhhc14	1.62027e-14	-0.534174	0.198	0.348	2.87079e-10	0.568965
Dph6	4.22107e-09	-0.272375	0.126	0.222	7.4789e-05	0.567567
Vps13a	2.9529e-09	-0.310269	0.148	0.261	5.23195e-05	0.56705
Supt16	2.72144e-15	-0.459913	0.216	0.382	4.82185e-11	0.565445
Btbd3	2.21892e-11	-0.284363	0.134	0.237	3.93148e-07	0.565401
Nin	7.0448e-18	-0.535551	0.249	0.441	1.2482e-13	0.564626
Ctnnb1	1.90997e-11	-0.358028	0.162	0.287	3.38408e-07	0.56446
Tra2b	5.55212e-14	-0.488939	0.228	0.404	9.83725e-10	0.564356
Grik4	1.05079e-07	-0.295613	0.116	0.206	0.00186179	0.563107
Ahctf1	2.28209e-11	-0.402119	0.192	0.341	4.0434e-07	0.56305
Ptprj	1.05783e-08	-0.428927	0.134	0.238	0.000187427	0.563025
Pcdh11x	7.76777e-06	-0.282572	0.094	0.167	0.137629	0.562874
Etf1	4.15645e-10	-0.307419	0.139	0.247	7.3644e-06	0.562753
Pcnt	6.05652e-15	-0.399513	0.194	0.345	1.07309e-10	0.562319
Hspa5	1.96109e-08	-0.330264	0.154	0.274	0.000347466	0.562044
Tom1l1	1.58115e-09	-0.317973	0.127	0.226	2.80148e-05	0.561947
Kcnd2	2.79017e-09	-1.2351	0.15	0.267	4.94362e-05	0.561798
Trps1	2.7395e-35	-0.838436	0.344	0.613	4.85385e-31	0.561174
Crim1	3.27157e-07	-0.277051	0.107	0.191	0.00579657	0.560209
Slc20a2	1.18925e-07	-0.296524	0.135	0.241	0.0021071	0.560166
Il1rapl1	1.07795e-20	-0.823604	0.269	0.482	1.90991e-16	0.558091
Nxn	7.24844e-08	-0.3794	0.164	0.294	0.00128428	0.557823
Stxbp6	6.99388e-14	-0.523409	0.219	0.393	1.23918e-09	0.557252
Cep295	9.74523e-16	-0.408346	0.185	0.332	1.72666e-11	0.557229
mt-Nd2	8.24734e-08	-0.278395	0.122	0.219	0.00146126	0.557077
Epn2	1.4606e-10	-0.302159	0.103	0.185	2.58789e-06	0.556756
Flrt2	1.82964e-16	-0.595013	0.22	0.396	3.24176e-12	0.555555
Brd7	7.78562e-16	-0.376961	0.16	0.288	1.37946e-11	0.555555
Msh3	1.69463e-09	-0.299064	0.14	0.252	3.00255e-05	0.555555
Tacc1	1.31754e-07	-0.292165	0.122	0.22	0.00233441	0.554545
Arhgap42	6.47066e-11	-0.42547	0.155	0.28	1.14647e-06	0.553571
Camk4	3.62278e-05	-0.410571	0.088	0.159	0.641885	0.553459
Eml1	3.1285e-11	-0.275415	0.133	0.241	5.54307e-07	0.551867
Ercc6l2	3.71835e-11	-0.318104	0.145	0.263	6.58818e-07	0.551331
Ssrp1	1.09821e-11	-0.263467	0.124	0.225	1.94581e-07	0.551111
Creb5	1.75573e-05	-0.317972	0.092	0.167	0.31108	0.550898
Rpl4	6.98904e-11	-0.383957	0.163	0.296	1.23832e-06	0.550675
Cadm1	1.27915e-123	-1.6019	0.469	0.852	2.26639e-119	0.550469
Cbx5	4.98255e-39	-0.79346	0.31	0.564	8.82809e-35	0.549645
Znrf3	9.75018e-18	-0.586532	0.25	0.455	1.72754e-13	0.54945
Thada	7.55226e-15	-0.494358	0.223	0.406	1.33811e-10	0.549261
Abcc1	9.0572e-14	-0.316511	0.123	0.224	1.60476e-09	0.549107
Ralyl	6.84251e-13	-0.857769	0.186	0.339	1.21236e-08	0.548672
Prkd3	4.0818e-15	-0.395615	0.181	0.33	7.23213e-11	0.548485
Srsf7	2.05315e-08	-0.371095	0.159	0.29	0.000363777	0.548276
Taco1	1.22081e-09	-0.353008	0.115	0.21	2.16303e-05	0.547619
Spred1	3.48221e-13	-0.373092	0.168	0.307	6.16977e-09	0.547231
Srsf10	1.1094e-17	-0.401904	0.169	0.309	1.96563e-13	0.546925
Ago2	1.61418e-18	-0.461921	0.204	0.373	2.86001e-14	0.546917
Gas5	1.33768e-11	-0.370256	0.146	0.267	2.37011e-07	0.546816
Lrch1	5.877e-08	-0.451959	0.188	0.344	0.00104129	0.546511
Stt3b	1.52429e-13	-0.473606	0.194	0.355	2.70073e-09	0.546479
Smc6	6.69937e-15	-0.479143	0.203	0.372	1.18699e-10	0.545699
Grid2	9.05821e-64	-1.41786	0.397	0.728	1.60493e-59	0.54533
Mad1l1	3.97211e-16	-0.385367	0.173	0.318	7.03778e-12	0.544025
Tshz3	3.77184e-12	-0.462245	0.173	0.318	6.68294e-08	0.544025
Utp20	1.00983e-08	-0.27028	0.101	0.186	0.000178922	0.54301
Cep83	4.25991e-17	-0.493107	0.207	0.382	7.54771e-13	0.541885
Hsp90b1	1.85402e-16	-0.491205	0.201	0.371	3.28495e-12	0.541779
Ybx1	1.81406e-12	-0.298929	0.124	0.229	3.21415e-08	0.541484
Suz12	6.25813e-13	-0.424982	0.184	0.34	1.10882e-08	0.541176
Ncapd2	2.58346e-16	-0.460799	0.174	0.322	4.57737e-12	0.540373
Cep290	2.10952e-11	-0.306799	0.134	0.248	3.73764e-07	0.540322
Kcnq3	6.52421e-19	-0.656878	0.222	0.412	1.15596e-14	0.538835
Prkdc	7.46148e-06	-0.305827	0.118	0.219	0.132203	0.538813
Nectin3	1.46127e-17	-0.410523	0.153	0.285	2.58907e-13	0.536842
Cbfa2t3	8.3769e-41	-1.04101	0.327	0.61	1.48422e-36	0.536065
Oxr1	2.60302e-06	-0.416828	0.138	0.258	0.0461204	0.534884
Wasf2	3.84863e-11	-0.379107	0.139	0.26	6.819e-07	0.534615
Mcm7	8.40824e-07	-0.300948	0.116	0.217	0.0148977	0.534562
Dgcr8	1.13677e-05	-0.341162	0.14	0.262	0.201413	0.534351
Rnf219	2.48263e-12	-0.267437	0.104	0.195	4.39872e-08	0.533333
Simc1	1.56041e-06	-0.272133	0.104	0.195	0.0276473	0.533333
Rnf4	3.0204e-06	-0.250891	0.096	0.18	0.0535154	0.533333
Azin1	1.08672e-11	-0.296943	0.113	0.212	1.92545e-07	0.533019
Rnd3	3.44301e-22	-0.593757	0.213	0.4	6.10032e-18	0.5325
Dtnb	8.45216e-15	-0.44476	0.168	0.316	1.49755e-10	0.531645
Nup155	1.0089e-10	-0.343211	0.145	0.273	1.78757e-06	0.531135
Lamc1	1.72727e-06	-0.447947	0.121	0.228	0.0306037	0.530702
Tmem55a	2.75962e-05	-0.257549	0.097	0.183	0.48895	0.530054
Nrip1	1.90666e-16	-0.362247	0.144	0.272	3.37822e-12	0.529412
Tjp1	2.23812e-23	-0.652834	0.208	0.393	3.96551e-19	0.529262
Rcc2	4.95975e-07	-0.271677	0.102	0.193	0.00878769	0.528497
Ulk4	1.31318e-12	-0.334292	0.121	0.229	2.32669e-08	0.528384
Cdyl	7.54075e-16	-0.456343	0.177	0.335	1.33607e-11	0.528358
Abce1	5.40312e-11	-0.282119	0.112	0.212	9.57325e-07	0.528302
Slc12a2	2.17581e-09	-0.362976	0.132	0.25	3.85511e-05	0.528
Mat2a	3.2987e-12	-0.319709	0.133	0.252	5.84464e-08	0.527778
Lhfpl3	0.000239685	-1.17288	0.087	0.165	1	0.527272
Lima1	4.80563e-09	-0.269043	0.092	0.175	8.51461e-05	0.525714
Gm26883	1.20613e-13	-0.397547	0.139	0.265	2.13702e-09	0.524528
Tpcn1	3.31955e-22	-0.583945	0.22	0.42	5.88158e-18	0.523809
Rad21	9.52254e-16	-0.56913	0.199	0.38	1.6872e-11	0.523684
Atm	1.72137e-14	-0.495496	0.181	0.346	3.04993e-10	0.523121
Lrp5	1.01416e-10	-0.289641	0.107	0.205	1.79689e-06	0.521951
Cep192	2.77492e-20	-0.448688	0.163	0.313	4.9166e-16	0.520767
Pde10a	1.0246e-16	-0.644353	0.167	0.321	1.81539e-12	0.520249
Usp37	3.02601e-13	-0.450904	0.158	0.304	5.36149e-09	0.519737
Arhgap31	7.75135e-18	-0.580324	0.173	0.333	1.37338e-13	0.519519
G3bp1	1.29335e-11	-0.37608	0.142	0.274	2.29155e-07	0.518248
Scd2	6.17787e-12	-0.45942	0.145	0.28	1.0946e-07	0.517857
Esyt1	2.00705e-08	-0.259153	0.088	0.17	0.000355609	0.517647
Wrn	4.63647e-14	-0.314121	0.121	0.234	8.2149e-10	0.517094
Asap1	4.9408e-46	-1.0237	0.32	0.619	8.75411e-42	0.516963
Tead2	1.2634e-09	-0.364966	0.123	0.238	2.23849e-05	0.516807
Pde4b	3.21127e-30	-1.06433	0.281	0.544	5.68974e-26	0.516544
Nucks1	8.34637e-19	-0.554563	0.192	0.372	1.47881e-14	0.516129
Mcph1	3.23854e-17	-0.592064	0.209	0.405	5.73804e-13	0.516049
Cenpj	3.5338e-08	-0.281082	0.098	0.19	0.000626119	0.515789
Pkm	2.02537e-06	-0.292106	0.098	0.19	0.0358856	0.515789
Eef1g	1.77455e-05	-0.254521	0.09	0.175	0.314414	0.514285
Gtf2f2	2.35713e-10	-0.295231	0.109	0.212	4.17637e-06	0.514151
Dnmt1	3.33503e-20	-0.495682	0.164	0.319	5.909e-16	0.514106
Galnt2	1.50441e-16	-0.490062	0.164	0.319	2.66552e-12	0.514106
Amotl1	2.0604e-09	-0.299397	0.096	0.187	3.65062e-05	0.513369
Clic4	3.23715e-09	-0.385612	0.137	0.267	5.73558e-05	0.513108
Tfdp1	6.38605e-10	-0.357512	0.119	0.232	1.13148e-05	0.512931
Alkbh1	6.52765e-10	-0.383036	0.125	0.244	1.15657e-05	0.512295
Arhgap10	2.35336e-11	-0.403228	0.15	0.293	4.16968e-07	0.511945
Flnb	9.29622e-11	-0.340764	0.11	0.215	1.6471e-06	0.511628
Hsph1	9.83198e-09	-0.270352	0.089	0.174	0.000174203	0.511494
Plxdc2	3.03899e-09	-0.537406	0.093	0.182	5.38448e-05	0.510989
Ctdspl2	8.20305e-19	-0.412386	0.148	0.29	1.45342e-14	0.510345
Tbata	5.32302e-12	-0.375133	0.103	0.202	9.43132e-08	0.509901
Cacna2d3	5.87805e-20	-0.785778	0.207	0.406	1.04147e-15	0.509852
Ptch2	1.23983e-27	-0.822895	0.241	0.474	2.19672e-23	0.508439
Ebf2	2.65091e-16	-0.706888	0.181	0.356	4.69689e-12	0.508427
Hmgb1	1.69802e-22	-0.467974	0.151	0.297	3.00855e-18	0.508417
Prkce	2.99411e-24	-0.815413	0.244	0.481	5.30497e-20	0.507276
Pold3	5.33877e-13	-0.323824	0.109	0.215	9.45924e-09	0.506977
Cep128	8.51723e-23	-0.645533	0.197	0.389	1.50908e-18	0.506427
Ptges3	3.26835e-08	-0.262743	0.084	0.166	0.000579085	0.506024
Ssr3	9.99905e-06	-0.260311	0.089	0.176	0.177163	0.505682
Hdgf	2.46718e-11	-0.288068	0.092	0.182	4.37134e-07	0.505494
Rftn1	4.48973e-29	-0.861086	0.266	0.527	7.9549e-25	0.504744
Casp8ap2	1.04564e-11	-0.362395	0.12	0.239	1.85267e-07	0.502092
Pabpc1	1.04548e-18	-0.442153	0.151	0.301	1.85239e-14	0.501661
Ntm	5.35208e-65	-1.6894	0.342	0.682	9.48282e-61	0.501466
Alcam	2.19443e-29	-0.889284	0.258	0.515	3.8881e-25	0.500971
Igdcc4	1.04522e-14	-0.65207	0.209	0.418	1.85193e-10	0.5
Etv6	1.98384e-21	-0.678192	0.207	0.414	3.51497e-17	0.5
Rpl13a	1.12063e-10	-0.365827	0.114	0.228	1.98553e-06	0.5
Arl6ip1	4.41369e-10	-0.417333	0.114	0.228	7.82018e-06	0.5
Chst11	2.17631e-08	-0.391343	0.088	0.176	0.000385598	0.5
Tmem132e	6.99496e-09	-0.30503	0.086	0.172	0.000123937	0.5
Rif1	8.42421e-31	-0.722935	0.23	0.462	1.4926e-26	0.497835
Islr2	1.63215e-12	-0.366768	0.096	0.193	2.89185e-08	0.497409
Pfas	6.80715e-10	-0.27284	0.081	0.163	1.20609e-05	0.496932
Ift80	6.94369e-12	-0.361332	0.117	0.236	1.23028e-07	0.495763
Cux2	5.39507e-21	-0.577825	0.169	0.341	9.55898e-17	0.495601
Ccdc34	5.35275e-11	-0.31814	0.105	0.212	9.484e-07	0.495283
Rrbp1	8.62315e-12	-0.391133	0.099	0.2	1.52785e-07	0.495
Trp53	9.49272e-09	-0.300208	0.092	0.186	0.000168192	0.494623
Klf13	1.0842e-17	-0.425999	0.134	0.271	1.92098e-13	0.494465
Naca	2.26105e-14	-0.275135	0.087	0.176	4.00612e-10	0.494318
Tank	9.41168e-11	-0.27798	0.086	0.174	1.66756e-06	0.494253
Fgf14	6.55044e-16	-1.3412	0.17	0.345	1.16061e-11	0.492753
Cbfb	2.51542e-19	-0.505121	0.161	0.327	4.45683e-15	0.492355
Chsy3	1.14386e-10	-0.359222	0.089	0.181	2.0267e-06	0.491712
Tmem245	4.70875e-21	-0.467444	0.148	0.301	8.34297e-17	0.491694
Pdzrn4	3.12491e-24	-0.653935	0.19	0.387	5.53671e-20	0.490956
Taf1d	6.64201e-24	-0.632794	0.186	0.379	1.17683e-19	0.490765
Pa2g4	2.21297e-13	-0.32573	0.105	0.214	3.92094e-09	0.490654
Terf1	5.90007e-13	-0.322001	0.104	0.212	1.04537e-08	0.490566
Hjurp	6.56743e-34	-0.971113	0.252	0.514	1.16362e-29	0.490272
Ncapd3	8.43539e-18	-0.54735	0.17	0.347	1.49458e-13	0.489913
Paxip1	3.12667e-13	-0.398508	0.117	0.239	5.53983e-09	0.48954
Gab2	1.41813e-07	-0.458479	0.113	0.231	0.00251265	0.489177
Tor1aip2	1.23499e-08	-0.269871	0.086	0.176	0.000218816	0.488636
Eefsec	6.47077e-07	-0.339005	0.105	0.215	0.0114649	0.488372
Rftn2	1.31806e-15	-0.511694	0.145	0.297	2.33534e-11	0.488215
Cse1l	3.82158e-12	-0.318577	0.101	0.207	6.77108e-08	0.487922
Galnt18	9.53184e-09	-0.344811	0.079	0.162	0.000168885	0.487654
Gjc1	2.98504e-14	-0.390415	0.117	0.24	5.28889e-10	0.4875
Mid1	1.92135e-14	-0.32173	0.097	0.199	3.40425e-10	0.487437
Trpm3	3.00151e-08	-0.999069	0.11	0.226	0.000531807	0.486725
Cntrl	1.57285e-24	-0.558969	0.157	0.323	2.78678e-20	0.486068
Traf3	2.57327e-16	-0.401641	0.118	0.243	4.55932e-12	0.485597
Cnbp	3.89937e-12	-0.317333	0.099	0.204	6.9089e-08	0.485294
Cdh13	3.88351e-29	-0.838531	0.197	0.406	6.8808e-25	0.485222
Ipo7	7.82057e-20	-0.50641	0.155	0.32	1.38565e-15	0.484375
Prdm11	7.4894e-15	-0.330233	0.093	0.192	1.32697e-10	0.484375
Usp10	2.80747e-12	-0.335118	0.108	0.223	4.97427e-08	0.484305
Rrp1b	2.26031e-08	-0.25971	0.076	0.157	0.000400481	0.484076
Mthfd1	7.17308e-14	-0.306983	0.086	0.178	1.27093e-09	0.483146
H2afv	8.92397e-08	-0.257983	0.086	0.178	0.00158115	0.483146
Pola1	3.57119e-42	-1.04017	0.257	0.532	6.32743e-38	0.483083
Mpp6	3.60057e-16	-0.391601	0.113	0.234	6.37949e-12	0.482906
Cplx2	3.66285e-14	-0.530741	0.148	0.307	6.48984e-10	0.482085
Rbbp8	3.04158e-15	-0.336518	0.101	0.21	5.38907e-11	0.480952
Hectd2	5.47925e-18	-0.500542	0.147	0.306	9.70813e-14	0.480392
Adk	1.36261e-29	-0.823263	0.232	0.483	2.41427e-25	0.480331
Cntln	2.56116e-20	-0.612711	0.179	0.373	4.53787e-16	0.479893
Tgfb2	5.18244e-22	-0.634058	0.165	0.344	9.18225e-18	0.479651
Eif2s2	6.37155e-12	-0.303123	0.08	0.167	1.12891e-07	0.479042
Ifrd1	2.97453e-10	-0.286921	0.079	0.165	5.27027e-06	0.478788
Phkb	1.35015e-17	-0.563251	0.157	0.328	2.39219e-13	0.478658
Pou3f2	2.77216e-13	-0.359226	0.097	0.203	4.91171e-09	0.477832
Spop	9.58064e-16	-0.469301	0.136	0.285	1.6975e-11	0.477193
Kcnab1	4.30765e-13	-0.3408	0.073	0.153	7.63229e-09	0.477124
Ssbp2	2.49177e-50	-1.02341	0.278	0.583	4.41491e-46	0.476844
Pms1	2.90436e-07	-0.307023	0.092	0.193	0.00514594	0.476684
Npm1	9.43305e-15	-0.465347	0.132	0.277	1.67135e-10	0.476534
Ezr	1.13508e-15	-0.441496	0.118	0.248	2.01114e-11	0.475806
Tmpo	4.18014e-28	-0.772072	0.206	0.435	7.40637e-24	0.473563
Cep68	1.96725e-07	-0.267126	0.071	0.15	0.00348557	0.473333
Rnf157	5.36172e-13	-0.307822	0.08	0.17	9.49989e-09	0.470588
Epb41l3	1.28454e-11	-0.356154	0.087	0.185	2.27595e-07	0.47027
B3glct	1.32692e-07	-0.275278	0.079	0.168	0.00235104	0.470238
Serinc5	6.49634e-18	-0.570475	0.154	0.328	1.15102e-13	0.469512
Dek	3.2541e-32	-0.64263	0.171	0.365	5.76562e-28	0.468493
Jun	4.99705e-21	-0.605164	0.156	0.333	8.85377e-17	0.468468
Nasp	7.66041e-35	-0.85416	0.228	0.487	1.35727e-30	0.468172
Vgll4	2.16264e-18	-0.463258	0.13	0.278	3.83177e-14	0.467626
Fam60a	1.54381e-06	-0.274251	0.07	0.15	0.0273533	0.466666
Klhl13	9.72151e-12	-0.362797	0.089	0.191	1.72246e-07	0.465968
Epb41l5	2.62972e-12	-0.340082	0.089	0.192	4.65935e-08	0.463541
Acsl3	3.28594e-08	-0.304159	0.076	0.164	0.000582203	0.463414
Obscn	2.47919e-14	-0.650894	0.106	0.229	4.39262e-10	0.462882
Ybx3	5.44827e-18	-0.373438	0.099	0.214	9.65324e-14	0.462617
Cep57	1.66651e-09	-0.281639	0.078	0.169	2.95272e-05	0.461538
Tbc1d1	3.9519e-15	-0.37593	0.095	0.206	7.00198e-11	0.461165
Rpn2	1.17263e-10	-0.282781	0.082	0.178	2.07767e-06	0.460674
Inpp5a	1.70805e-15	-0.401349	0.111	0.241	3.02631e-11	0.460581
Nolc1	1.01672e-08	-0.300144	0.08	0.174	0.000180143	0.45977
Mpdz	1.10417e-29	-0.675562	0.182	0.396	1.95636e-25	0.459596
Npat	5.915e-10	-0.387886	0.108	0.235	1.04802e-05	0.459574
Sgcd	9.45419e-28	-1.18957	0.202	0.44	1.67509e-23	0.459091
Hnrnpf	2.43251e-11	-0.308896	0.077	0.168	4.30992e-07	0.458333
Sema7a	8.00623e-48	-1.0499	0.245	0.535	1.41854e-43	0.457944
Anp32e	1.7272e-16	-0.440596	0.112	0.245	3.06025e-12	0.457143
Prex1	1.35283e-11	-0.458345	0.1	0.219	2.39694e-07	0.456621
Dnmt3a	1.58858e-19	-0.515627	0.135	0.296	2.81465e-15	0.456081
Prim2	3.25879e-23	-0.621509	0.15	0.329	5.77392e-19	0.455927
Sel1l3	5.40291e-09	-0.329227	0.072	0.158	9.57287e-05	0.455696
Mctp1	7.16543e-13	-0.50594	0.085	0.187	1.26957e-08	0.454545
Mettl15	2.64202e-10	-0.382974	0.103	0.227	4.68112e-06	0.453744
Homer2	1.47397e-20	-0.477764	0.12	0.265	2.61158e-16	0.45283
Naa50	7.67409e-08	-0.302749	0.076	0.168	0.00135969	0.452381
Gnl3	2.85857e-14	-0.466907	0.113	0.25	5.06481e-10	0.452
Rbbp7	7.72976e-10	-0.355333	0.089	0.197	1.36956e-05	0.451776
Phka1	2.96146e-13	-0.348001	0.09	0.2	5.24712e-09	0.45
Fam19a5	2.64158e-32	-0.716097	0.17	0.378	4.68036e-28	0.449735
Dtx1	2.28872e-11	-0.319514	0.071	0.158	4.05515e-07	0.449367
Vrk1	1.62413e-09	-0.324069	0.083	0.185	2.87763e-05	0.448648
Rangap1	1.28975e-09	-0.353155	0.09	0.201	2.28518e-05	0.447761
Nr1d2	9.11559e-10	-0.281943	0.068	0.152	1.6151e-05	0.447368
Clip4	2.19295e-10	-0.323486	0.078	0.175	3.88547e-06	0.445714
Polr1a	9.00667e-08	-0.347885	0.08	0.18	0.0015958	0.444444
Airn	2.37424e-17	-0.735868	0.163	0.367	4.20669e-13	0.444142
Irs1	1.62391e-55	-1.07173	0.237	0.534	2.87725e-51	0.44382
Rpsa	2.67476e-10	-0.393827	0.09	0.203	4.73914e-06	0.44335
Sae1	2.23449e-15	-0.513974	0.127	0.287	3.95907e-11	0.442509
Snx5	7.28195e-16	-0.447243	0.101	0.229	1.29022e-11	0.441048
Prdm5	6.17295e-06	-0.32249	0.071	0.161	0.109372	0.440994
Nedd1	2.97617e-09	-0.255244	0.067	0.152	5.27318e-05	0.440789
Dpy19l1	5.77822e-14	-0.328729	0.085	0.193	1.02379e-09	0.440414
Ccp110	1.01124e-12	-0.398269	0.099	0.225	1.79172e-08	0.44
Phldb2	4.30862e-09	-0.371026	0.077	0.175	7.63402e-05	0.44
Draxin	1.14223e-58	-1.2219	0.274	0.624	2.0238e-54	0.439102
Ncam2	1.3948e-05	-0.787801	0.09	0.205	0.247131	0.439024
Nr3c1	1.86753e-14	-0.501999	0.121	0.276	3.30889e-10	0.438406
Prmt8	2.56781e-39	-1.08185	0.213	0.487	4.54965e-35	0.437372
Ddx21	1.14595e-10	-0.366184	0.082	0.188	2.03039e-06	0.43617
Svil	2.38529e-17	-0.717016	0.14	0.321	4.22625e-13	0.436137
Itgb8	5.99145e-12	-0.440035	0.098	0.226	1.06157e-07	0.433628
Haus6	6.56493e-15	-0.368239	0.087	0.201	1.16317e-10	0.432836
Spidr	1.85e-13	-0.39977	0.089	0.206	3.27784e-09	0.432039
Epb41l2	1.48405e-31	-0.827692	0.152	0.352	2.62944e-27	0.431818
Rgs20	1.93031e-29	-0.858486	0.178	0.413	3.42012e-25	0.430993
Mob3b	1.19132e-16	-0.498816	0.108	0.251	2.11078e-12	0.430279
Nop58	2.60885e-19	-0.570545	0.135	0.314	4.62237e-15	0.429936
Baz1a	8.32644e-26	-0.639731	0.134	0.314	1.47528e-21	0.426751
Rad50	2.85246e-11	-0.307244	0.067	0.157	5.05399e-07	0.426751
Gria3	4.622e-34	-0.772446	0.165	0.388	8.18926e-30	0.425258
Pxdn	7.86777e-13	-0.28518	0.065	0.153	1.39401e-08	0.424836
Lrp1b	4.85295e-15	-1.26283	0.092	0.217	8.59845e-11	0.423963
Skp2	6.99391e-16	-0.285729	0.064	0.151	1.23918e-11	0.423841
Blm	6.30804e-18	-0.496755	0.11	0.26	1.11766e-13	0.423077
Fkbp5	1.94038e-12	-0.37779	0.075	0.178	3.43796e-08	0.421348
Btbd11	5.87457e-87	-1.62171	0.287	0.682	1.04086e-82	0.420821
Ctdspl	2.58088e-13	-0.460605	0.083	0.198	4.5728e-09	0.419192
Galnt7	4.72525e-16	-0.378176	0.072	0.172	8.37219e-12	0.418604
Abr	1.59353e-22	-0.522297	0.105	0.251	2.82342e-18	0.418327
Ska2	4.64637e-09	-0.329412	0.074	0.178	8.23245e-05	0.41573
Med12l	3.60343e-58	-1.06314	0.211	0.508	6.38457e-54	0.415354
Igf2bp3	5.65068e-16	-0.374391	0.071	0.171	1.00119e-11	0.415204
Immp2l	1.63801e-14	-0.525607	0.085	0.205	2.90223e-10	0.414634
Ncaph2	1.78508e-13	-0.302807	0.065	0.157	3.1628e-09	0.414012
Stard13	5.32797e-13	-0.550725	0.065	0.157	9.44011e-09	0.414012
Gstcd	2.48789e-16	-0.466732	0.096	0.232	4.40805e-12	0.413793
Nop56	8.87375e-17	-0.507387	0.105	0.254	1.57225e-12	0.413386
Boc	2.94532e-86	-1.55885	0.28	0.679	5.21851e-82	0.412371
Nup210	1.69803e-22	-0.601089	0.12	0.291	3.00858e-18	0.412371
Itsn2	3.41579e-17	-0.483743	0.094	0.229	6.0521e-13	0.41048
Mpp5	1.38437e-15	-0.3353	0.066	0.161	2.45283e-11	0.409938
Dock9	1.06225e-09	-0.592944	0.066	0.161	1.8821e-05	0.409938
Lrrc8c	1.42115e-11	-0.407562	0.075	0.183	2.51799e-07	0.409836
Smc4	1.14779e-45	-1.00994	0.178	0.436	2.03366e-41	0.408257
Cep152	1.40142e-16	-0.426351	0.089	0.218	2.48303e-12	0.408257
Csmd2	1.43139e-14	-0.733579	0.1	0.245	2.53614e-10	0.408163
Cmtm4	1.35573e-25	-0.600646	0.125	0.307	2.40208e-21	0.407166
Rapgef4	7.50246e-12	-0.575132	0.074	0.182	1.32929e-07	0.406593
Mtbp	2.02763e-15	-0.430996	0.089	0.219	3.59255e-11	0.406393
Diaph2	4.43895e-39	-0.954173	0.185	0.46	7.86492e-35	0.402174
Ipo5	2.02395e-14	-0.466733	0.088	0.219	3.58604e-10	0.401826
Ntng2	1.05309e-15	-0.331938	0.063	0.157	1.86586e-11	0.401274
Lrig3	8.16315e-51	-1.14333	0.205	0.513	1.44635e-46	0.39961
Pcdh9	1.73571e-38	-1.8735	0.201	0.504	3.07534e-34	0.398809
Fndc3b	2.54579e-16	-0.4908	0.09	0.226	4.51063e-12	0.39823
Arid5b	3.30912e-13	-0.455112	0.07	0.176	5.8631e-09	0.397727
Lpin2	2.16203e-37	-0.800081	0.15	0.378	3.83069e-33	0.396825
Vcl	1.4494e-14	-0.580996	0.098	0.249	2.56805e-10	0.393574
Pcdh7	2.61989e-31	-1.01294	0.154	0.393	4.64192e-27	0.391857
Topbp1	6.36515e-20	-0.53414	0.101	0.258	1.12778e-15	0.391473
Myo1e	2.52519e-20	-0.529448	0.086	0.22	4.47413e-16	0.390909
Atad5	1.81209e-26	-0.702396	0.123	0.315	3.21065e-22	0.390476
Mb21d2	1.08782e-19	-0.605003	0.105	0.269	1.92739e-15	0.390334
Myh9	1.79001e-17	-0.443025	0.062	0.159	3.17155e-13	0.389937
Ndc1	1.36709e-11	-0.287072	0.058	0.15	2.42221e-07	0.386666
Bcl2	1.53254e-16	-0.49912	0.082	0.213	2.71536e-12	0.384976
Rbms3	1.43335e-34	-1.01712	0.153	0.399	2.53961e-30	0.383459
Mcm9	4.27984e-17	-0.381518	0.064	0.167	7.58302e-13	0.383233
Cnksr3	5.55332e-11	-0.443167	0.067	0.175	9.83937e-07	0.382857
Itpr1	2.26191e-22	-0.757853	0.119	0.311	4.00766e-18	0.382637
Cep112	1.26139e-22	-0.596053	0.097	0.254	2.23494e-18	0.38189
Kctd8	3.63205e-19	-0.862092	0.105	0.275	6.43527e-15	0.381818
Dpyd	1.0777e-11	-0.503237	0.074	0.194	1.90947e-07	0.381443
Alg13	7.05945e-16	-0.377052	0.064	0.168	1.25079e-11	0.380952
Lig1	2.36236e-22	-0.546983	0.086	0.226	4.18562e-18	0.380531
Epha5	9.11695e-16	-0.590437	0.08	0.212	1.61534e-11	0.377358
Cdh4	7.68879e-83	-1.62844	0.217	0.577	1.3623e-78	0.376083
Cep135	8.86125e-20	-0.491139	0.084	0.224	1.57004e-15	0.375
Gsg1l	5.07307e-115	-2.10144	0.28	0.747	8.98847e-111	0.374833
Dusp10	7.30752e-08	-0.402959	0.056	0.15	0.00129475	0.373333
Pola2	3.37913e-17	-0.367091	0.057	0.153	5.98714e-13	0.372549
Hat1	2.15771e-10	-0.3502	0.057	0.153	3.82303e-06	0.372549
Greb1l	1.58905e-25	-0.772787	0.108	0.29	2.81548e-21	0.372414
Ece1	4.48489e-12	-0.423661	0.064	0.172	7.94632e-08	0.372093
Sgms1	1.65802e-26	-0.759592	0.099	0.267	2.93767e-22	0.370786
Eln	4.64087e-23	-0.743164	0.085	0.23	8.22269e-19	0.369565
Tspan18	1.22668e-27	-0.59265	0.082	0.222	2.17342e-23	0.369369
Pcx	1.26516e-17	-0.545529	0.082	0.222	2.24161e-13	0.369369
Cdh8	4.08176e-26	-0.851283	0.126	0.342	7.23206e-22	0.368421
Rad18	1.42215e-20	-0.500783	0.084	0.228	2.51976e-16	0.368421
Pard3b	4.31253e-73	-1.42904	0.212	0.579	7.64094e-69	0.366148
Map3k20	1.45396e-14	-0.441373	0.065	0.178	2.57613e-10	0.365168
Sipa1l1	2.58519e-11	-0.445518	0.067	0.186	4.58044e-07	0.360215
Ctps	1.0025e-15	-0.404626	0.063	0.175	1.77622e-11	0.36
Srebf1	4.95797e-18	-0.534651	0.074	0.206	8.78453e-14	0.359223
Mki67	1.4173e-68	-1.87564	0.19	0.529	2.51117e-64	0.359168
Pex5l	1.68647e-25	-0.715174	0.101	0.282	2.98809e-21	0.358156
Nkd1	2.69043e-41	-1.02808	0.149	0.418	4.76691e-37	0.356459
Gli2	1.09863e-86	-1.70761	0.222	0.624	1.94656e-82	0.355769
Pald1	4.04701e-16	-0.520315	0.068	0.192	7.1705e-12	0.354166
Mms22l	7.36042e-40	-0.760997	0.109	0.308	1.30412e-35	0.353896
Tanc1	1.73282e-16	-0.445897	0.058	0.164	3.07021e-12	0.353658
Gm11541	4.29442e-07	-0.39898	0.057	0.162	0.00760886	0.351852
Pitpnm2	1.48887e-28	-0.764622	0.112	0.32	2.63798e-24	0.35
Sema3e	1.61258e-25	-0.640686	0.085	0.244	2.85717e-21	0.348361
Wdhd1	3.38171e-15	-0.429668	0.059	0.17	5.99171e-11	0.347059
Syne1	2.31861e-28	-1.10349	0.097	0.28	4.10812e-24	0.346428
Phldb1	1.06347e-13	-0.507998	0.071	0.205	1.88426e-09	0.346341
Hpca	1.77859e-15	-0.58341	0.077	0.223	3.15131e-11	0.345291
Fstl1	2.27073e-18	-0.46722	0.059	0.171	4.02327e-14	0.345029
Unc80	3.09654e-21	-0.548367	0.071	0.206	5.48645e-17	0.34466
Dock1	8.02185e-112	-1.70358	0.234	0.682	1.42131e-107	0.343108
Pkp4	1.52391e-53	-1.14712	0.16	0.467	2.70006e-49	0.342612
Wipf1	7.79278e-09	-0.448324	0.053	0.155	0.000138073	0.341935
Smoc1	1.68054e-53	-1.31322	0.155	0.455	2.97759e-49	0.340659
Abtb2	3.44823e-27	-0.796389	0.094	0.276	6.10958e-23	0.34058
Disp3	4.35432e-31	-0.766284	0.098	0.289	7.71498e-27	0.3391
Ddr2	2.36609e-26	-0.778811	0.108	0.319	4.19224e-22	0.338558
Vat1l	3.12615e-19	-0.585209	0.061	0.181	5.53892e-15	0.337016
Wwc1	1.98711e-15	-0.60427	0.067	0.199	3.52076e-11	0.336683
Brca2	1.10819e-23	-0.602938	0.081	0.241	1.96348e-19	0.336099
Rpa1	4.29353e-17	-0.433096	0.055	0.164	7.60727e-13	0.335366
Elmsan1	2.04385e-22	-0.677226	0.09	0.269	3.6213e-18	0.334572
Zranb3	4.88778e-18	-0.504839	0.063	0.19	8.66016e-14	0.331579
Slco3a1	1.32783e-15	-0.461377	0.055	0.166	2.35265e-11	0.331325
Itga9	1.27393e-08	-0.54814	0.053	0.16	0.000225715	0.33125
Kcnh5	1.78131e-30	-0.812328	0.101	0.305	3.15613e-26	0.331147
Usp1	2.12169e-12	-0.375769	0.05	0.151	3.7592e-08	0.331126
Zgrf1	9.79364e-21	-0.645725	0.083	0.252	1.73524e-16	0.329365
Nek7	2.61758e-37	-0.836374	0.107	0.329	4.63784e-33	0.325228
Mdc1	2.94661e-22	-0.48993	0.064	0.197	5.2208e-18	0.324873
Hells	2.17914e-27	-0.685244	0.076	0.235	3.861e-23	0.323404
Chsy1	1.44453e-26	-0.673118	0.084	0.263	2.55943e-22	0.319392
Pqlc1	2.23851e-23	-0.675269	0.08	0.251	3.9662e-19	0.318725
Pde7b	6.63001e-11	-0.66369	0.057	0.179	1.17471e-06	0.318436
Smc2	1.35153e-62	-1.31439	0.148	0.465	2.39463e-58	0.31828
Cerk	2.05e-26	-0.680053	0.083	0.262	3.63219e-22	0.316794
Itpr2	2.31045e-15	-0.649222	0.055	0.174	4.09366e-11	0.316092
Ust	1.21481e-63	-1.46964	0.165	0.524	2.1524e-59	0.314885
Egr1	7.26298e-24	-0.68718	0.072	0.232	1.28685e-19	0.310345
Tbc1d31	4.43774e-13	-0.367423	0.047	0.152	7.86278e-09	0.30921
St3gal4	1.19411e-19	-0.585259	0.065	0.212	2.11572e-15	0.306604
Tnfaip8	1.11649e-30	-0.844835	0.088	0.288	1.9782e-26	0.305555
Gpc6	8.83591e-93	-2.02944	0.187	0.614	1.56555e-88	0.30456
Rrm1	1.87268e-16	-0.512606	0.059	0.195	3.31802e-12	0.302564
Dock10	3.29688e-24	-0.880245	0.084	0.279	5.84142e-20	0.301075
Syt13	1.71587e-19	-0.543365	0.056	0.186	3.04018e-15	0.301075
Mef2c	8.19221e-19	-0.565933	0.056	0.186	1.4515e-14	0.301075
Eya4	1.69209e-43	-1.07562	0.114	0.379	2.99805e-39	0.300791
Mdga2	4.52616e-32	-1.33557	0.109	0.366	8.01946e-28	0.297814
Plxna2	1.18695e-30	-1.12699	0.096	0.323	2.10305e-26	0.297214
Ldlrad3	3.0294e-19	-0.527111	0.049	0.165	5.36748e-15	0.29697
Kirrel3	1.16831e-13	-1.38964	0.049	0.165	2.07002e-09	0.29697
Hk2	6.06071e-17	-0.535275	0.056	0.189	1.07384e-12	0.296296
Hist1h1e	5.78973e-13	-0.439745	0.045	0.152	1.02582e-08	0.296052
Prkd1	2.59828e-40	-1.06124	0.105	0.355	4.60363e-36	0.295775
Slc4a4	2.24553e-11	-0.85698	0.047	0.159	3.97863e-07	0.295597
Racgap1	2.50485e-29	-0.616463	0.067	0.227	4.43809e-25	0.295154
Fbxl7	3.99892e-16	-0.698364	0.054	0.184	7.08529e-12	0.293478
Samd4	6.40843e-18	-0.675477	0.06	0.206	1.13545e-13	0.291262
Grin3a	1.16549e-25	-0.754053	0.071	0.245	2.06502e-21	0.289796
Dtl	1.31051e-32	-0.776662	0.077	0.267	2.32196e-28	0.288389
Mcm6	2.06554e-21	-0.549543	0.051	0.177	3.65972e-17	0.288135
Arhgap26	9.16326e-19	-0.679996	0.058	0.202	1.62355e-14	0.287129
Slc7a1	6.88591e-36	-0.82748	0.075	0.263	1.22005e-31	0.285171
Smco4	1.49531e-22	-0.501155	0.05	0.176	2.6494e-18	0.284091
Ror2	3.92465e-29	-0.873554	0.083	0.293	6.9537e-25	0.283276
Polq	3.47823e-32	-0.663268	0.066	0.234	6.16273e-28	0.282051
Tenm3	1.61742e-48	-1.14362	0.103	0.366	2.86575e-44	0.281421
Lrp8	4.28973e-13	-0.64094	0.047	0.168	7.60054e-09	0.279762
Sept8	3.19089e-18	-0.50122	0.047	0.17	5.65362e-14	0.27647
Pcgf5	1.59597e-15	-0.521899	0.046	0.167	2.82774e-11	0.275449
Nhs	2.43321e-57	-1.24367	0.105	0.384	4.31115e-53	0.273437
Car10	1.61624e-24	-1.50126	0.059	0.216	2.86365e-20	0.273148
Pvt1	2.46321e-45	-1.07236	0.098	0.359	4.36431e-41	0.27298
Anp32b	7.42351e-36	-0.660942	0.066	0.242	1.3153e-31	0.272727
Gnai2	1.17222e-17	-0.539317	0.051	0.187	2.07694e-13	0.272727
Lockd	2.85029e-17	-0.561549	0.051	0.187	5.05014e-13	0.272727
Epb41l4b	8.6092e-25	-0.724469	0.057	0.21	1.52538e-20	0.271428
Cenpf	1.17257e-37	-1.20082	0.082	0.306	2.07756e-33	0.267974
Ncapg2	3.50394e-28	-0.658895	0.06	0.224	6.20828e-24	0.267857
Asic2	2.25623e-16	-1.26963	0.043	0.163	3.99758e-12	0.263804
Ptprm	7.32995e-34	-1.18085	0.063	0.244	1.29872e-29	0.258197
Rbl1	2.53178e-25	-0.539643	0.05	0.194	4.4858e-21	0.257732
Clip1	3.73798e-26	-0.629922	0.052	0.203	6.62295e-22	0.256158
Efcab11	3.78833e-31	-0.801065	0.063	0.248	6.71216e-27	0.254032
Cenpp	3.87505e-48	-1.25724	0.095	0.374	6.86581e-44	0.254011
Tmtc1	3.98523e-40	-1.02999	0.082	0.323	7.06102e-36	0.25387
Thsd4	1.88194e-28	-1.02894	0.064	0.253	3.33442e-24	0.252964
Bora	1.21222e-24	-0.525166	0.043	0.17	2.1478e-20	0.252941
Prkg1	2.98596e-23	-1.08958	0.045	0.178	5.29052e-19	0.252809
Cenpe	1.28037e-44	-1.24004	0.082	0.325	2.26857e-40	0.252308
Lrrtm3	5.8063e-17	-0.841665	0.044	0.175	1.02876e-12	0.251428
Fat1	2.24768e-41	-0.808088	0.069	0.275	3.98244e-37	0.250909
Atad2	6.87578e-47	-1.03482	0.081	0.325	1.21825e-42	0.249231
Pole	3.34211e-31	-0.616615	0.051	0.205	5.92156e-27	0.24878
Pdlim3	1.62167e-55	-1.41523	0.095	0.382	2.87327e-51	0.248691
Whrn	1.03643e-53	-1.09962	0.081	0.327	1.83635e-49	0.247706
Slc44a5	1.90481e-19	-0.534516	0.038	0.154	3.37494e-15	0.246753
Nr3c2	2.68471e-54	-1.35124	0.096	0.392	4.75677e-50	0.244898
Rad51b	4.98693e-57	-1.44742	0.098	0.403	8.83584e-53	0.243176
Notch2	6.8229e-28	-0.679786	0.053	0.218	1.20888e-23	0.243119
Kif24	2.03135e-28	-0.584175	0.047	0.196	3.59915e-24	0.239796
Acer3	1.39292e-18	-0.618449	0.044	0.184	2.46797e-14	0.23913
Grb10	7.87994e-29	-0.807022	0.053	0.223	1.39617e-24	0.237668
Vsx2	1.03971e-24	-0.593198	0.037	0.156	1.84215e-20	0.237179
Bcar3	1.00259e-26	-0.65664	0.044	0.186	1.77639e-22	0.236559
Ccdc18	1.21332e-19	-0.5538	0.042	0.178	2.14975e-15	0.235955
Ccnd1	2.50298e-68	-1.23894	0.092	0.39	4.43478e-64	0.235897
Palld	6.01555e-17	-0.58419	0.037	0.157	1.06584e-12	0.235669
Fosb	1.5513e-37	-1.20526	0.074	0.317	2.74859e-33	0.233438
Cklf	5.66455e-23	-0.585732	0.044	0.191	1.00364e-18	0.230366
Bmpr1b	1.09343e-22	-0.575234	0.036	0.157	1.93734e-18	0.229299
Mast4	1.13122e-21	-0.7996	0.035	0.153	2.0043e-17	0.228758
Kif20b	9.51487e-34	-0.988481	0.064	0.282	1.68584e-29	0.22695
Sorcs2	1.08214e-44	-1.14535	0.07	0.311	1.91734e-40	0.22508
Angptl2	2.31971e-24	-0.626057	0.042	0.187	4.11007e-20	0.224599
Ablim2	6.40235e-22	-0.566927	0.035	0.156	1.13437e-17	0.224359
Kitl	6.65404e-33	-0.768611	0.048	0.216	1.17896e-28	0.222222
Hmgb2	1.96231e-21	-0.502524	0.036	0.162	3.47682e-17	0.222222
Top2a	2.65564e-67	-1.6739	0.093	0.419	4.70526e-63	0.221957
Col4a1	3.51268e-37	-1.05508	0.045	0.203	6.22377e-33	0.221675
Sash1	4.55434e-23	-0.702508	0.042	0.192	8.06937e-19	0.21875
Adamts1	2.02997e-19	-0.630502	0.038	0.174	3.59669e-15	0.218391
Brca1	1.40661e-30	-0.703317	0.047	0.216	2.49223e-26	0.217592
Lama2	9.94995e-32	-1.16137	0.057	0.266	1.76293e-27	0.214286
Dgkb	7.56024e-31	-1.03502	0.054	0.253	1.33952e-26	0.213439
Col4a2	1.2729e-36	-1.07447	0.044	0.207	2.25533e-32	0.21256
Akna	6.75546e-24	-0.550102	0.032	0.151	1.19693e-19	0.21192
Brip1	2.49088e-25	-0.614492	0.038	0.18	4.41335e-21	0.211111
Gpr153	5.89919e-40	-0.85791	0.055	0.262	1.04522e-35	0.209924
Rad54b	1.69506e-23	-0.553848	0.037	0.177	3.00331e-19	0.209039
Clspn	3.55975e-33	-0.65568	0.04	0.192	6.30716e-29	0.208333
Kif18a	2.41137e-26	-0.699195	0.043	0.208	4.27247e-22	0.206731
Plk4	4.03171e-21	-0.446848	0.031	0.15	7.14338e-17	0.206667
Angpt1	8.52938e-20	-0.640605	0.032	0.157	1.51124e-15	0.203822
Bard1	7.65467e-28	-0.535347	0.032	0.158	1.35626e-23	0.202532
Adcy2	1.40874e-25	-0.793673	0.038	0.189	2.49601e-21	0.201058
Adamts14	1.11013e-37	-1.01262	0.056	0.279	1.96692e-33	0.200717
Kif15	4.66221e-52	-1.26722	0.069	0.345	8.2605e-48	0.2
Fat3	2.143e-71	-1.54118	0.083	0.421	3.79696e-67	0.19715
Pclaf	1.20069e-17	-0.53883	0.031	0.158	2.12739e-13	0.196202
Smad3	4.93659e-40	-0.995299	0.053	0.271	8.74664e-36	0.195572
Diaph3	2.15838e-89	-1.74767	0.086	0.445	3.82422e-85	0.193258
Tacc3	9.57844e-24	-0.575831	0.033	0.171	1.69711e-19	0.192982
Aspm	6.37477e-51	-1.32871	0.057	0.296	1.12948e-46	0.192568
Fos	1.57345e-18	-0.653527	0.031	0.161	2.78783e-14	0.192546
Rgma	1.97909e-42	-0.932691	0.049	0.258	3.50655e-38	0.189922
Kif11	4.27272e-57	-1.26024	0.061	0.323	7.57041e-53	0.188854
Kank1	5.17527e-25	-0.796154	0.037	0.197	9.16955e-21	0.187817
Incenp	1.03359e-31	-0.825783	0.045	0.24	1.83131e-27	0.1875
Arhgap11a	1.39998e-22	-0.545126	0.03	0.16	2.48048e-18	0.1875
E2f7	2.93221e-37	-0.687847	0.038	0.203	5.19528e-33	0.187192
Adamts20	2.55758e-37	-0.93836	0.049	0.263	4.53153e-33	0.186312
Gli1	5.89834e-48	-0.964353	0.052	0.28	1.04507e-43	0.185714
Prkcq	3.87529e-25	-0.555282	0.028	0.152	6.86625e-21	0.18421
Mamdc2	3.74805e-33	-0.781956	0.037	0.201	6.6408e-29	0.18408
Ckap2	9.87456e-20	-0.565675	0.03	0.163	1.74957e-15	0.184049
Cacnb2	6.34901e-29	-0.851448	0.036	0.197	1.12492e-24	0.182741
Tcf7l2	1.09945e-35	-0.909944	0.042	0.231	1.94801e-31	0.181818
Gm48530	3.6131e-22	-0.597972	0.029	0.16	6.40169e-18	0.18125
Mis18bp1	1.29781e-35	-0.78766	0.037	0.209	2.29946e-31	0.177033
Knl1	2.27968e-54	-1.25576	0.058	0.328	4.03914e-50	0.176829
Kntc1	8.39073e-37	-0.727266	0.037	0.212	1.48667e-32	0.174528
Cit	1.03222e-52	-1.08698	0.052	0.299	1.82889e-48	0.173913
Hhip	6.37585e-51	-1.2464	0.052	0.301	1.12967e-46	0.172757
Ckap2l	2.40431e-25	-0.575041	0.028	0.164	4.25996e-21	0.170732
Csgalnact1	8.1076e-26	-0.678673	0.026	0.154	1.4365e-21	0.168831
Lama5	2.26181e-43	-0.988244	0.04	0.237	4.00748e-39	0.168776
Tpx2	2.71301e-44	-0.955353	0.041	0.244	4.80691e-40	0.168033
Neil3	9.58328e-41	-0.851927	0.038	0.229	1.69797e-36	0.165939
Ncapg	4.55613e-34	-0.67304	0.031	0.19	8.07255e-30	0.163158
Gli3	2.55941e-24	-0.781119	0.03	0.188	4.53477e-20	0.159574
Adamts12	1.03208e-25	-0.766648	0.027	0.17	1.82864e-21	0.158823
Kif4	1.1654e-40	-0.922833	0.039	0.246	2.06486e-36	0.158537
Anln	1.95625e-37	-0.815267	0.034	0.222	3.46608e-33	0.153153
Bub1b	1.95607e-26	-0.598189	0.024	0.163	3.46576e-22	0.147239
Nusap1	6.85612e-26	-0.598799	0.024	0.165	1.21477e-21	0.145454
Ect2	4.14249e-40	-0.890595	0.033	0.227	7.33967e-36	0.145374
Prc1	8.91353e-34	-0.748757	0.028	0.193	1.5793e-29	0.145078
Bub1	4.5171e-31	-0.653787	0.025	0.179	8.00339e-27	0.139665
Kif14	4.48428e-36	-0.656655	0.023	0.165	7.94524e-32	0.139394
Ttk	1.72307e-31	-0.601984	0.022	0.164	3.05293e-27	0.134146
Hmmr	6.69191e-24	-0.591198	0.02	0.15	1.18567e-19	0.133333
Kif23	1.62157e-36	-0.808218	0.027	0.206	2.8731e-32	0.131068
Cdca2	7.79758e-36	-0.922386	0.03	0.231	1.38158e-31	0.12987
Spag5	2.6962e-29	-0.55513	0.018	0.151	4.77714e-25	0.119205
Ndc80	7.05007e-26	-0.573087	0.017	0.151	1.24913e-21	0.112583
Depdc1b	1.16743e-22	-0.611417	0.014	0.151	2.06844e-18	0.0927152

## Sheet: cluster 7
gene	p_val	avg_log2FC	fraction + in cluster	fraction + not in cluster	p_val_adj	ratio + in:out of cluster
Adamts18	7.64247e-117	2.16723	0.519	0.042	1.35409e-112	12.3571
Gm42397	5.77647e-73	1.6738	0.339	0.032	1.02348e-68	10.5937
Fat2	3.50534e-119	1.9521	0.502	0.048	6.21076e-115	10.4583
Il16	7.18564e-89	1.59323	0.398	0.041	1.27315e-84	9.70729
Dok6	2.47566e-61	1.59931	0.315	0.044	4.38638e-57	7.15907
Grin1	3.5201e-84	1.45975	0.396	0.057	6.23692e-80	6.94736
Gabra2	6.46311e-76	1.52267	0.373	0.055	1.14513e-71	6.78181
Gm13052	4.13256e-114	1.75985	0.544	0.082	7.32206e-110	6.63414
Atp2b3	4.79341e-34	0.87249	0.192	0.029	8.49296e-30	6.62067
Unc5b	3.02898e-67	1.24523	0.329	0.05	5.36675e-63	6.57999
Kcnk2	1.2142e-56	1.33222	0.343	0.053	2.15132e-52	6.47169
Gm7854	8.57431e-22	0.749866	0.167	0.027	1.5192e-17	6.18516
Col12a1	3.1941e-48	1.07538	0.252	0.042	5.6593e-44	5.99999
Kazn	6.38017e-73	1.40801	0.428	0.075	1.13044e-68	5.70666
Grm1	6.96575e-132	2.22026	0.63	0.115	1.23419e-127	5.47826
Car10	5.54518e-240	3.16077	0.889	0.166	9.82496e-236	5.35542
Grm4	4.45085e-22	0.627713	0.171	0.032	7.88602e-18	5.34373
Dpf3	4.58555e-86	1.74122	0.506	0.095	8.12468e-82	5.32631
Zmat4	1.01563e-139	2.14122	0.662	0.126	1.79949e-135	5.25396
Ryr2	8.01181e-177	2.42037	0.738	0.141	1.41953e-172	5.23404
Ube2ql1	2.37375e-44	1.03634	0.276	0.055	4.20581e-40	5.01817
L1cam	3.05078e-74	1.44859	0.461	0.094	5.40538e-70	4.90425
Slc4a4	6.56159e-113	1.6184	0.611	0.125	1.16258e-108	4.888
Brinp3	1.62525e-62	1.41504	0.408	0.085	2.87962e-58	4.79999
Pitpnm3	5.1681e-32	0.862068	0.223	0.048	9.15684e-28	4.64582
Camk4	2.28809e-108	1.75978	0.588	0.129	4.05404e-104	4.55814
Lhfp	1.85205e-75	1.47903	0.466	0.103	3.28147e-71	4.52427
Runx1t1	9.27209e-73	1.51645	0.432	0.096	1.64283e-68	4.5
Hcn1	3.78444e-105	1.80327	0.584	0.13	6.70527e-101	4.4923
Lrp1b	1.89876e-172	2.30972	0.784	0.175	3.36422e-168	4.48
Cdh10	5.52096e-82	1.67931	0.465	0.104	9.78203e-78	4.47115
Jph4	1.20349e-25	0.808632	0.229	0.053	2.13235e-21	4.32075
Atp1a3	2.03871e-30	0.707358	0.193	0.046	3.61218e-26	4.19564
Cemip	1.95995e-37	1.01455	0.28	0.067	3.47264e-33	4.1791
Tanc2	3.16867e-77	1.3964	0.49	0.12	5.61424e-73	4.08333
Sez6	7.95437e-61	1.27251	0.401	0.1	1.40935e-56	4.01
Rasgef1c	2.27691e-24	0.656524	0.172	0.043	4.03423e-20	3.99999
Cntn1	4.83694e-113	1.69406	0.647	0.162	8.57009e-109	3.99382
Lrrtm3	1.49287e-101	1.77389	0.567	0.142	2.64507e-97	3.99295
Lrrc4c	6.90669e-133	1.73144	0.682	0.172	1.22373e-128	3.96511
Ephb1	1.56195e-208	2.37226	0.881	0.224	2.76745e-204	3.93303
Brinp2	7.64722e-33	0.875471	0.242	0.062	1.35493e-28	3.90322
Cntnap4	6.03247e-115	1.8111	0.662	0.179	1.06883e-110	3.69832
Galr1	4.30557e-35	0.846107	0.238	0.065	7.6286e-31	3.66153
Chrm3	4.48834e-78	1.68497	0.506	0.139	7.95244e-74	3.64029
Ksr2	4.5469e-44	1.05344	0.33	0.091	8.05619e-40	3.62637
Ndst3	3.96809e-147	1.99568	0.778	0.219	7.03066e-143	3.55251
Gm29398	3.64234e-16	0.599643	0.159	0.045	6.4535e-12	3.53333
Ptchd4	2.06462e-51	1.26386	0.389	0.111	3.6581e-47	3.5045
Cacna1e	5.89373e-233	2.69766	0.933	0.267	1.04425e-228	3.49438
Sema4f	4.79302e-28	0.622657	0.183	0.053	8.49227e-24	3.45282
Unc5c	8.44833e-185	2.52171	0.821	0.239	1.49687e-180	3.43515
Sptbn4	1.21558e-19	0.584753	0.168	0.049	2.15377e-15	3.42856
Shank1	7.00689e-16	0.602178	0.167	0.049	1.24148e-11	3.40816
Zbtb46	2.57911e-29	0.783266	0.241	0.072	4.56967e-25	3.34722
Arhgap20	7.44265e-61	1.08897	0.377	0.115	1.31869e-56	3.27826
Kcnd3	1.01997e-43	1.34254	0.412	0.126	1.80719e-39	3.26984
Rgs7bp	2.45169e-26	0.753957	0.212	0.065	4.34391e-22	3.26153
Syt9	1.52041e-53	1.21524	0.43	0.134	2.69386e-49	3.20895
Sgk1	1.37261e-21	0.670651	0.194	0.061	2.432e-17	3.18032
Rgs17	1.10919e-38	0.973361	0.317	0.1	1.96526e-34	3.17
Syn3	7.52449e-155	2.17319	0.795	0.253	1.33319e-150	3.14229
Pacsin1	1.49998e-27	0.828051	0.282	0.091	2.65767e-23	3.0989
Ptprr	2.22246e-34	0.985372	0.318	0.103	3.93775e-30	3.08738
Kcnd2	5.49938e-104	1.94556	0.714	0.233	9.7438e-100	3.06438
Nrg2	1.4295e-22	0.658149	0.208	0.068	2.53278e-18	3.05882
Vat1l	4.99324e-57	1.4206	0.469	0.155	8.84702e-53	3.0258
Cacna1a	6.45547e-162	1.88885	0.843	0.279	1.14378e-157	3.0215
Adcy1	9.9789e-15	0.557121	0.187	0.062	1.76806e-10	3.01612
Mpp3	4.04473e-18	0.599994	0.186	0.062	7.16646e-14	3
Srcin1	1.25914e-63	1.19454	0.475	0.159	2.23094e-59	2.98742
Mest	1.03732e-17	0.552292	0.17	0.057	1.83792e-13	2.98245
Abcc8	3.68389e-23	0.764458	0.245	0.083	6.52712e-19	2.9518
Meg3	1.19902e-23	0.593238	0.226	0.077	2.12442e-19	2.93506
Plxna2	5.21824e-155	2.05068	0.815	0.278	9.24568e-151	2.93165
Kcnk1	2.69684e-38	1.06098	0.382	0.131	4.77826e-34	2.91603
Unc5d	4.09948e-81	1.78863	0.571	0.197	7.26345e-77	2.89848
Camk2b	8.79239e-22	0.626915	0.225	0.078	1.55783e-17	2.88461
Eps8	4.41845e-29	0.990128	0.333	0.116	7.82861e-25	2.87069
Epb41l1	4.32512e-101	1.63726	0.689	0.241	7.66324e-97	2.85892
Gm26871	6.33567e-35	0.938039	0.336	0.118	1.12255e-30	2.84746
Nebl	5.21045e-17	0.650452	0.162	0.057	9.23188e-13	2.8421
Wscd2	6.77346e-48	1.0674	0.437	0.154	1.20012e-43	2.83766
Ntrk2	4.38846e-86	1.31115	0.578	0.204	7.77547e-82	2.83333
Ank1	5.93323e-33	0.895953	0.322	0.114	1.05125e-28	2.82456
Pde9a	3.92732e-26	0.8933	0.325	0.117	6.95842e-22	2.77778
Gabbr2	2.77074e-50	1.09383	0.444	0.164	4.9092e-46	2.70732
Sh3rf3	7.39236e-14	0.655862	0.183	0.068	1.30978e-09	2.69117
Sel1l3	7.58801e-37	0.993463	0.374	0.139	1.34444e-32	2.69065
Dnajc6	1.73179e-27	0.898759	0.336	0.127	3.06839e-23	2.64567
Tenm1	5.84056e-71	1.39137	0.534	0.202	1.03483e-66	2.64356
Nol4l	7.21601e-41	0.974094	0.389	0.148	1.27853e-36	2.62838
Zfyve28	1.50885e-18	0.788916	0.267	0.102	2.67338e-14	2.61764
Cdh18	6.06753e-33	0.865676	0.266	0.102	1.07505e-28	2.60784
Pld5	7.32631e-25	0.766823	0.279	0.107	1.29808e-20	2.60747
Pak1	5.2689e-10	0.611881	0.225	0.087	9.33544e-06	2.5862
Arpp21	8.55711e-268	2.92219	0.985	0.381	1.51615e-263	2.5853
Add3	1.35738e-27	0.8973	0.335	0.13	2.405e-23	2.57692
Dlg2	1.31697e-126	1.71745	0.784	0.305	2.3334e-122	2.57049
Atp8a2	1.82221e-25	0.875956	0.354	0.138	3.22859e-21	2.56522
Pax6os1	3.54669e-16	0.574656	0.182	0.071	6.28403e-12	2.56338
Nrg3	1.09888e-27	0.756438	0.225	0.088	1.947e-23	2.55682
Porcn	6.08851e-18	0.486435	0.167	0.066	1.07876e-13	2.5303
Gprin3	5.1456e-18	0.583868	0.202	0.08	9.11698e-14	2.525
Cd47	8.59277e-25	0.850588	0.33	0.132	1.52247e-20	2.5
Syne1	3.77456e-74	1.30988	0.617	0.248	6.68777e-70	2.4879
Rap1gap2	3.06233e-17	0.578059	0.189	0.076	5.42584e-13	2.48684
Hivep3	7.7619e-185	2.0713	0.905	0.364	1.37525e-180	2.48626
Optn	4.22039e-14	0.579216	0.208	0.084	7.47768e-10	2.47619
Fgf14	4.33269e-125	1.8206	0.759	0.308	7.67666e-121	2.46428
Cpeb2	1.85989e-29	0.736677	0.296	0.121	3.29536e-25	2.44628
Adamtsl3	3.97403e-33	1.00889	0.435	0.178	7.04119e-29	2.44382
Rnasel	7.20154e-14	0.484587	0.175	0.072	1.27597e-09	2.43055
Gabrg2	2.94011e-14	0.539291	0.187	0.077	5.20929e-10	2.42857
Mndal	4.13067e-12	0.521577	0.177	0.073	7.31872e-08	2.42465
B3galt2	3.92319e-10	0.432184	0.16	0.066	6.95112e-06	2.42424
Mapt	1.51147e-54	1.09526	0.535	0.222	2.67802e-50	2.40991
Cacnb4	1.83639e-54	1.16638	0.545	0.227	3.25371e-50	2.40088
Nrxn3	4.95071e-62	0.984846	0.628	0.262	8.77167e-58	2.39695
Mast1	1.20912e-19	0.620776	0.258	0.108	2.14231e-15	2.38889
Nyap2	2.75788e-50	1.10487	0.557	0.234	4.88641e-46	2.38034
Pfkp	7.78939e-11	0.485664	0.157	0.066	1.38012e-06	2.37878
Ptchd1	1.21296e-09	0.550514	0.174	0.074	2.14912e-05	2.35135
Csmd2	2.62488e-51	1.37424	0.511	0.219	4.65077e-47	2.33333
Luzp2	6.65856e-55	1.02246	0.506	0.217	1.17976e-50	2.3318
Syp	6.49169e-26	0.743373	0.31	0.133	1.1502e-21	2.33083
Prkcz	1.17351e-08	0.55271	0.198	0.085	0.000207923	2.32941
Sgsm1	5.73715e-22	0.813446	0.333	0.144	1.01651e-17	2.3125
Dtna	1.50666e-53	1.048	0.48	0.208	2.6695e-49	2.30769
Grin2b	7.1678e-156	1.69998	0.916	0.397	1.26999e-151	2.3073
Hmgcll1	3.90642e-10	0.590319	0.221	0.096	6.9214e-06	2.30208
Mmp24	5.08003e-45	1.01679	0.519	0.226	9.00079e-41	2.29646
Synpr	1.00664e-104	1.47239	0.735	0.321	1.78357e-100	2.28972
Sez6l2	1.01712e-12	0.437356	0.162	0.071	1.80213e-08	2.28169
Tenm2	3.93861e-47	1.20634	0.511	0.225	6.97842e-43	2.27111
Syt1	4.5899e-30	0.850082	0.404	0.178	8.13239e-26	2.26966
Snap91	3.09984e-32	0.945538	0.454	0.201	5.4923e-28	2.25871
Cadps2	1.90308e-225	2.52614	0.961	0.426	3.37187e-221	2.25587
Cnksr3	4.47383e-26	0.87294	0.354	0.157	7.92673e-22	2.25478
Trhde	1.3701e-25	0.921949	0.303	0.135	2.42754e-21	2.24444
Ppp1r13b	1.27246e-12	0.554802	0.206	0.092	2.25455e-08	2.23913
Jazf1	1.23747e-11	0.618976	0.221	0.099	2.19256e-07	2.23232
Mapk4	5.83827e-36	0.909279	0.399	0.181	1.03442e-31	2.20442
Abca2	7.68518e-18	0.619236	0.251	0.114	1.36166e-13	2.20175
Slc24a2	3.57931e-13	0.519434	0.224	0.102	6.34182e-09	2.19608
Mindy2	2.00107e-19	0.70832	0.294	0.134	3.5455e-15	2.19403
Dpysl3	1.06037e-28	0.808696	0.397	0.181	1.87877e-24	2.19337
Apc2	7.33105e-20	0.711307	0.331	0.152	1.29892e-15	2.17763
Pou2f2	1.7178e-25	0.791407	0.394	0.182	3.04359e-21	2.16483
Lin7a	1.5222e-18	0.593474	0.251	0.116	2.69704e-14	2.16379
Cacna1c	5.19798e-191	2.04521	0.943	0.437	9.20978e-187	2.15789
Cerkl	1.74244e-10	0.48681	0.178	0.083	3.08726e-06	2.14458
Rgs7	2.05352e-39	1.05533	0.49	0.229	3.63843e-35	2.13974
Camk2d	4.0838e-113	1.52899	0.795	0.374	7.23568e-109	2.12567
Rasa3	1.22291e-23	0.819086	0.371	0.175	2.16674e-19	2.12
Nfasc	1.04739e-41	0.667385	0.551	0.261	1.85576e-37	2.11111
Cacna2d3	4.36365e-113	1.86967	0.778	0.37	7.73151e-109	2.1027
Elmo1	4.42748e-114	1.43739	0.825	0.398	7.8446e-110	2.07286
Mir124a-1hg	1.43183e-61	1.09233	0.622	0.301	2.53692e-57	2.06644
Ppp1r14c	2.44132e-76	1.29897	0.744	0.361	4.32553e-72	2.06094
Adam23	8.43759e-23	0.760534	0.34	0.166	1.49497e-18	2.04819
Ncam2	3.42354e-26	0.741896	0.383	0.187	6.06583e-22	2.04813
Snhg14	2.56264e-82	1.24334	0.726	0.358	4.54049e-78	2.02793
Gm31409	1.77684e-16	0.68661	0.314	0.155	3.1482e-12	2.02581
St6galnac3	9.99956e-43	0.974629	0.586	0.292	1.77172e-38	2.00685
Stmn4	1.54058e-20	0.638529	0.297	0.148	2.72961e-16	2.00676
Neurod1	3.79896e-42	1.00922	0.599	0.299	6.73099e-38	2.00334
Adarb1	1.66416e-22	0.684243	0.35	0.175	2.94856e-18	2
Stmn2	3.49845e-40	0.91018	0.571	0.287	6.19855e-36	1.98955
Ttyh2	3.14947e-08	0.397898	0.194	0.098	0.000558024	1.97959
Lzts1	3.94427e-23	0.754629	0.422	0.214	6.98847e-19	1.97196
Lgr5	1.65922e-14	0.553013	0.206	0.105	2.9398e-10	1.9619
Ppm1h	1.53846e-52	0.976825	0.658	0.336	2.72585e-48	1.95833
Dscam	2.80912e-49	0.731603	0.567	0.29	4.97719e-45	1.95517
Sema4g	2.35359e-07	0.396932	0.168	0.086	0.00417009	1.95349
Prdm8	9.77667e-12	0.578761	0.273	0.14	1.73223e-07	1.95
Abca5	2.85298e-11	0.419415	0.183	0.094	5.05491e-07	1.94681
Gm5087	7.13801e-15	0.496671	0.214	0.11	1.26471e-10	1.94545
Map3k12	2.7048e-13	0.613474	0.272	0.14	4.79237e-09	1.94286
Kcnk10	9.71818e-19	0.721164	0.369	0.191	1.72187e-14	1.93194
Pcdha11	3.61462e-24	0.711642	0.389	0.202	6.40439e-20	1.92574
Cadm2	5.59903e-269	2.55412	0.99	0.515	9.92036e-265	1.92233
Samd12	9.11343e-71	0.907766	0.77	0.401	1.61472e-66	1.9202
Kcnq5	1.21599e-201	2.57384	0.944	0.494	2.15449e-197	1.91093
Sorbs2	1.16817e-22	0.600443	0.345	0.181	2.06976e-18	1.90608
Dusp5	1.31883e-06	0.357538	0.152	0.08	0.023367	1.9
Atp9a	7.40718e-14	0.579489	0.298	0.157	1.3124e-09	1.89809
Kcnc1	1.16744e-17	0.674513	0.33	0.174	2.06848e-13	1.89655
Nrg1	1.3917e-97	1.44828	0.851	0.449	2.46581e-93	1.89532
Rps6ka3	3.90696e-76	1.38891	0.714	0.378	6.92235e-72	1.88889
Mapre3	1.2022e-05	0.365735	0.175	0.093	0.213005	1.88172
Nectin3	3.03043e-34	0.986043	0.496	0.264	5.36931e-30	1.87879
Tle2	4.63854e-12	0.352939	0.163	0.087	8.21856e-08	1.87356
Glce	1.35792e-62	1.1555	0.704	0.377	2.40596e-58	1.86737
Gm20687	7.4075e-19	0.648455	0.367	0.197	1.31246e-14	1.86294
Zfp804a	2.02686e-30	0.781245	0.417	0.224	3.59119e-26	1.86161
Grk3	1.422e-30	0.800138	0.463	0.25	2.51951e-26	1.852
Hs6st3	7.6852e-116	1.93377	0.831	0.449	1.36166e-111	1.85078
Apba1	1.98925e-51	1.09853	0.729	0.394	3.52455e-47	1.85025
Sphkap	1.74346e-46	0.934092	0.62	0.336	3.08907e-42	1.84524
Snca	7.86744e-07	0.457807	0.16	0.087	0.0139395	1.83908
Opcml	3.6382e-81	1.17989	0.795	0.434	6.44617e-77	1.8318
Fam110b	3.50457e-08	0.488001	0.23	0.126	0.000620939	1.8254
Gm20125	1.16958e-22	0.638692	0.341	0.187	2.07226e-18	1.82353
Aig1	1.04051e-25	0.776293	0.459	0.254	1.84358e-21	1.80709
Cers4	1.82211e-09	0.380848	0.176	0.098	3.22842e-05	1.79592
Serpini1	1.33817e-10	0.474251	0.228	0.127	2.37097e-06	1.79527
Cers6	3.92361e-23	0.694844	0.419	0.234	6.95185e-19	1.7906
Kcnmb4	3.45183e-12	0.484185	0.227	0.127	6.11595e-08	1.7874
Rundc3b	3.8184e-13	0.528577	0.271	0.152	6.76544e-09	1.78289
Gpr158	1.11079e-32	0.788989	0.6	0.337	1.9681e-28	1.78041
Tacc2	1.74897e-15	0.622759	0.352	0.198	3.09883e-11	1.77778
Prkce	1.01355e-86	1.26773	0.792	0.446	1.79581e-82	1.77578
Kcnma1	9.38715e-50	0.952797	0.605	0.341	1.66321e-45	1.77419
Plxdc2	1.78771e-14	0.425377	0.298	0.168	3.16746e-10	1.77381
Celf5	3.29561e-08	0.390856	0.2	0.113	0.000583916	1.76991
Timp3	3.26651e-05	0.314835	0.175	0.099	0.578759	1.76767
Unc13a	2.05254e-24	0.778078	0.505	0.286	3.63669e-20	1.76573
Pcdh9	2.36462e-94	1.14681	0.819	0.464	4.18963e-90	1.76509
Abat	2.23752e-11	0.350329	0.164	0.093	3.96444e-07	1.76344
Cyfip2	5.3653e-12	0.491061	0.31	0.176	9.50623e-08	1.76136
Rims1	1.45632e-88	1.18141	0.846	0.481	2.5803e-84	1.75884
Efr3b	2.31792e-20	0.672181	0.443	0.252	4.10688e-16	1.75794
Sema4d	3.91991e-05	0.386698	0.188	0.107	0.694529	1.75701
Rai2	2.2524e-17	0.57114	0.321	0.183	3.9908e-13	1.7541
Msra	3.49816e-85	1.39284	0.797	0.455	6.19804e-81	1.75165
Rapgef4	2.64299e-12	0.420505	0.294	0.168	4.68285e-08	1.75
Khdrbs2	1.9814e-12	0.35107	0.18	0.103	3.51065e-08	1.74757
Nrxn2	2.21581e-24	0.632149	0.463	0.265	3.92596e-20	1.74717
Zfp385b	1.20977e-93	1.27729	0.852	0.488	2.14347e-89	1.7459
Arhgap44	2.14943e-16	0.631995	0.368	0.211	3.80836e-12	1.74408
Bicdl1	4.74114e-06	0.339171	0.155	0.089	0.0840034	1.74157
Plppr5	3.59761e-11	0.472643	0.249	0.143	6.37425e-07	1.74126
Cadm3	4.42878e-37	0.705514	0.567	0.326	7.84692e-33	1.73926
Ppp2r2b	7.70936e-27	0.678418	0.557	0.322	1.36594e-22	1.72981
Celf3	9.12529e-17	0.583804	0.377	0.218	1.61682e-12	1.72936
Shank3	1.31763e-06	0.37634	0.19	0.11	0.0233457	1.72727
Kif5a	7.28808e-15	0.561378	0.37	0.217	1.2913e-10	1.70507
Usp29	1.35929e-40	0.939773	0.645	0.379	2.40839e-36	1.70185
Otud7a	8.19946e-41	0.889986	0.662	0.389	1.45278e-36	1.7018
Mctp1	6.6733e-08	0.553753	0.296	0.174	0.00118238	1.70115
Acss2	3.51132e-06	0.338212	0.181	0.107	0.0622135	1.69159
Ppfia3	9.65005e-06	0.343004	0.186	0.11	0.17098	1.69091
Apbb1	1.43485e-07	0.321164	0.152	0.09	0.00254226	1.68889
Scaper	2.88862e-42	0.890612	0.647	0.385	5.11805e-38	1.68052
Myt1	3.99513e-30	0.671518	0.567	0.342	7.07857e-26	1.65789
Zfhx2os	4.03997e-21	0.685535	0.452	0.273	7.15801e-17	1.65568
Celf4	3.02423e-159	1.64708	0.96	0.582	5.35833e-155	1.64948
March4	1.24159e-05	0.280754	0.155	0.094	0.219985	1.64893
Stxbp5l	3.9412e-51	0.921597	0.762	0.465	6.98302e-47	1.63871
Erc2	3.67532e-43	0.912191	0.658	0.404	6.51193e-39	1.62871
Kcnj3	1.67345e-86	1.07777	0.838	0.515	2.96503e-82	1.62718
Shank2	1.88811e-08	0.421513	0.203	0.125	0.000334535	1.624
March3	2.25723e-10	0.464905	0.318	0.196	3.99936e-06	1.62245
Sh3gl3	6.69644e-07	0.343342	0.183	0.113	0.0118648	1.61947
Hivep2	1.33051e-70	1.10672	0.798	0.493	2.3574e-66	1.61866
Sept3	7.9253e-35	0.766019	0.581	0.359	1.4042e-30	1.61838
Gm20696	3.52559e-39	0.839973	0.676	0.419	6.24664e-35	1.61336
Pgm2l1	2.24995e-11	0.449838	0.271	0.168	3.98645e-07	1.61309
Fos	1.5786e-06	0.406709	0.237	0.147	0.0279696	1.61224
Myt1l	6.57229e-34	0.73874	0.681	0.423	1.16448e-29	1.60993
Pclo	2.59098e-59	0.917512	0.713	0.443	4.5907e-55	1.60948
Ralyl	4.4446e-23	0.649395	0.511	0.318	7.87494e-19	1.60692
Ror1	1.69422e-31	0.765035	0.604	0.376	3.00182e-27	1.60638
Map3k13	1.60437e-22	0.542734	0.44	0.274	2.84263e-18	1.60584
Chd3	3.95127e-05	0.361029	0.231	0.144	0.700086	1.60417
Sh3gl2	3.19519e-89	1.21354	0.858	0.536	5.66124e-85	1.60075
Triobp	0.000316129	0.365006	0.176	0.11	1	1.6
Rps6ka2	2.75057e-11	0.506608	0.323	0.202	4.87345e-07	1.59901
Nmnat2	1.54201e-23	0.629565	0.47	0.294	2.73214e-19	1.59864
Lrp1	5.17762e-09	0.378846	0.326	0.204	9.1737e-05	1.59804
Fgf13	1.80395e-121	1.41443	0.902	0.565	3.19625e-117	1.59646
Gpm6a	7.38332e-103	1.20949	0.91	0.571	1.30818e-98	1.59369
Tmtc2	1.12067e-89	1.25036	0.897	0.564	1.9856e-85	1.59043
Fnbp1	7.03239e-14	0.530406	0.467	0.294	1.246e-09	1.58843
Cntn2	1.82913e-33	0.485945	0.782	0.493	3.24086e-29	1.58621
Dner	3.67903e-37	0.767431	0.669	0.422	6.51851e-33	1.58531
Epb41l3	3.88592e-08	0.50899	0.274	0.173	0.000688507	1.58381
Rimklb	0.00101421	0.367004	0.201	0.127	1	1.58268
Fxyd6	2.57489e-11	0.487384	0.307	0.194	4.5622e-07	1.58247
Dpp6	5.96683e-31	0.850121	0.593	0.375	1.0572e-26	1.58133
Cpeb3	3.22086e-12	0.472985	0.316	0.2	5.70671e-08	1.58
Adcy9	3.97444e-08	0.36507	0.216	0.137	0.000704191	1.57664
Dopey2	4.84608e-13	0.495473	0.329	0.209	8.58628e-09	1.57416
Clvs1	9.07545e-44	0.822466	0.743	0.472	1.60799e-39	1.57415
Mtss1	1.10825e-86	1.17502	0.884	0.563	1.9636e-82	1.57016
Slc44a1	2.29107e-17	0.580164	0.469	0.299	4.05931e-13	1.56856
Klhl29	1.81082e-113	1.35416	0.931	0.594	3.20841e-109	1.56734
Atxn1	5.6143e-18	0.676857	0.517	0.33	9.94741e-14	1.56667
Thra	1.87319e-12	0.489908	0.347	0.222	3.31892e-08	1.56306
Ldlrad4	2.03053e-34	0.821611	0.685	0.439	3.59769e-30	1.56036
Slc8a1	3.628e-22	0.541199	0.457	0.293	6.42809e-18	1.55973
Sergef	3.41061e-12	0.473398	0.306	0.197	6.04292e-08	1.5533
Madd	9.04073e-05	0.343543	0.214	0.138	1	1.55072
Pag1	1.60973e-22	0.596305	0.483	0.312	2.85211e-18	1.54808
Mturn	2.56697e-07	0.316851	0.181	0.117	0.00454815	1.54701
Hcfc2	4.82271e-09	0.445873	0.285	0.185	8.54487e-05	1.54054
St8sia1	1.0732e-05	0.292008	0.183	0.119	0.190149	1.53781
Pcdh7	8.24574e-26	0.656034	0.562	0.366	1.46098e-21	1.53552
Dusp8	3.81396e-07	0.310375	0.175	0.114	0.00675758	1.53509
Igsf21	8.73048e-23	0.559474	0.548	0.357	1.54687e-18	1.53501
Kcnj6	3.63563e-39	0.860003	0.725	0.473	6.4416e-35	1.53277
Mgat4c	3.94875e-17	0.264147	0.418	0.273	6.9964e-13	1.53113
Herc3	1.33387e-06	0.358254	0.234	0.153	0.0236335	1.52941
Lrrc4b	5.64992e-07	0.263096	0.188	0.123	0.0100105	1.52845
Zfp57	0.000166702	0.319173	0.201	0.133	1	1.51128
Parp8	1.89501e-14	0.4779	0.356	0.236	3.35759e-10	1.50847
Gm9801	1.49694e-14	0.540518	0.469	0.311	2.65228e-10	1.50804
Map6	1.36116e-13	0.376138	0.289	0.192	2.4117e-09	1.50521
Dgki	8.17624e-14	0.592504	0.547	0.364	1.44867e-09	1.50275
Cacna1d	1.09775e-17	0.625731	0.569	0.379	1.94499e-13	1.50132
Cacna1b	1.03332e-29	0.671768	0.632	0.421	1.83083e-25	1.50119
Pdzd4	0.000455386	0.294049	0.192	0.128	1	1.5
Abca3	1.71418e-06	0.294756	0.175	0.117	0.0303718	1.49573
Sgip1	1.40002e-30	0.697605	0.641	0.429	2.48056e-26	1.49417
Eml6	1.73576e-05	0.49836	0.382	0.256	0.307541	1.49219
Syn1	0.000910812	0.263903	0.164	0.11	1	1.49091
Lingo1	1.53372e-06	0.303197	0.222	0.149	0.0271745	1.48993
Sorbs1	6.02716e-66	1.06204	0.876	0.588	1.06789e-61	1.4898
Egfr	1.38279e-35	0.800813	0.71	0.477	2.45002e-31	1.48847
Pxk	0.000211021	0.276667	0.177	0.119	1	1.48739
Phactr3	0.000227044	0.279909	0.208	0.14	1	1.48571
Dpysl5	1.0371e-08	0.50984	0.442	0.298	0.000183754	1.48322
Sez6l	0.000361472	0.458683	0.372	0.251	1	1.48207
Park2	1.45094e-19	0.681818	0.535	0.361	2.57078e-15	1.48199
Tbc1d9	3.7493e-06	0.388463	0.286	0.193	0.0664301	1.48186
Epha3	4.16718e-06	0.376447	0.271	0.183	0.0738341	1.48087
Tcp11l1	1.0836e-08	0.412328	0.256	0.173	0.000191993	1.47977
Nos1ap	1.86597e-09	0.369248	0.265	0.18	3.30613e-05	1.47222
Gab1	9.2334e-26	0.662986	0.6	0.408	1.63597e-21	1.47059
Brinp1	1.40593e-08	0.384297	0.333	0.227	0.000249102	1.46696
Srgap1	1.3825e-05	0.324726	0.283	0.193	0.244952	1.46632
Fam107b	8.66325e-11	0.486268	0.331	0.226	1.53496e-06	1.4646
Zfpm2	2.24013e-250	2.3377	0.997	0.681	3.96907e-246	1.46402
Nln	1.07434e-06	0.266637	0.18	0.123	0.0190351	1.46341
Kidins220	1.6188e-18	0.558123	0.539	0.369	2.8682e-14	1.4607
Ankrd12	2.04609e-12	0.527186	0.451	0.309	3.62526e-08	1.45955
Tubb2b	2.11044e-08	0.329028	0.213	0.146	0.000373928	1.4589
Susd6	1.50722e-10	0.426772	0.365	0.251	2.67049e-06	1.45418
Ntn4	1.07302e-17	0.600479	0.545	0.375	1.90117e-13	1.45333
Dbn1	2.79409e-07	0.360273	0.289	0.199	0.00495057	1.45226
Rp9	0.000185581	0.253219	0.187	0.129	1	1.44961
Shf	3.57665e-05	0.255557	0.171	0.118	0.633711	1.44915
Slc7a14	5.24516e-07	0.308459	0.207	0.143	0.00929337	1.44755
Lmtk3	4.70387e-06	0.305668	0.217	0.15	0.0833431	1.44667
Stxbp1	9.57321e-14	0.501967	0.468	0.325	1.69618e-09	1.44
Nhsl1	7.21896e-25	0.503504	0.506	0.352	1.27906e-20	1.4375
Gm37013	4.11207e-07	0.385094	0.283	0.197	0.00728576	1.43655
Tsga10	8.56645e-08	0.362656	0.292	0.204	0.0015178	1.43137
Mcf2l	5.01383e-05	0.305031	0.312	0.218	0.88835	1.43119
Pitpnc1	9.17594e-21	0.494215	0.486	0.34	1.62579e-16	1.42941
Scamp1	8.45237e-07	0.284537	0.22	0.154	0.0149759	1.42857
Cnksr2	1.06966e-44	0.839633	0.795	0.557	1.89522e-40	1.42729
Gatsl2	0.000488586	0.275731	0.181	0.127	1	1.4252
Pik3c2b	0.000414175	0.273344	0.195	0.137	1	1.42336
Mbnl2	1.52003e-51	1.0076	0.79	0.556	2.69319e-47	1.42086
Reep1	4.4942e-07	0.356339	0.298	0.211	0.00796282	1.41232
Dscaml1	1.81764e-27	0.541967	0.776	0.55	3.22049e-23	1.41091
Xkr4	7.28457e-75	0.983398	0.924	0.655	1.29068e-70	1.41069
Myo10	5.4563e-14	0.380457	0.513	0.364	9.66747e-10	1.40934
Prkca	5.28297e-06	0.335817	0.286	0.203	0.0936037	1.40887
St18	2.44445e-17	0.429351	0.674	0.48	4.33109e-13	1.40417
Evi5l	0.000142453	0.294027	0.216	0.154	1	1.4026
Csrnp3	3.19002e-16	0.559256	0.478	0.341	5.65208e-12	1.40176
Kcnq2	9.63238e-10	0.340962	0.36	0.257	1.70666e-05	1.40078
Rnf150	1.78602e-11	0.438326	0.42	0.3	3.16447e-07	1.4
Ppfia2	2.07733e-62	0.866225	0.88	0.629	3.68061e-58	1.39905
Scrt2	3.71428e-05	0.280613	0.249	0.178	0.658096	1.39888
Tmem178	2.70255e-07	0.434209	0.397	0.284	0.00478838	1.39789
Pde10a	3.89376e-12	0.307628	0.424	0.304	6.89897e-08	1.39474
Nrep	1.89667e-06	0.390693	0.364	0.261	0.0336052	1.39464
Carmil1	2.70031e-19	0.518699	0.501	0.36	4.78441e-15	1.39167
Sv2b	3.86613e-25	0.691376	0.785	0.565	6.85002e-21	1.38938
Egr1	5.71967e-06	0.273764	0.3	0.216	0.101341	1.38889
Sema6a	3.23683e-67	0.912137	0.907	0.654	5.73501e-63	1.38685
Ina	2.51712e-07	0.304498	0.241	0.174	0.00445983	1.38506
Foxn2	8.0652e-09	0.405155	0.342	0.247	0.000142899	1.38461
Slc24a3	1.47915e-08	0.368463	0.303	0.219	0.000262076	1.38356
Inpp4a	6.04611e-09	0.355108	0.282	0.204	0.000107125	1.38235
Amph	3.26964e-23	0.646961	0.624	0.452	5.79315e-19	1.38053
Mdga2	6.65777e-11	0.485021	0.472	0.342	1.17962e-06	1.38012
Erc1	9.94049e-19	0.575153	0.637	0.462	1.76126e-14	1.37879
Plppr3	0.000485948	0.264943	0.233	0.169	1	1.3787
Unc79	8.28936e-19	0.510732	0.6	0.436	1.46871e-14	1.37615
Spata13	1.2559e-13	0.521913	0.487	0.354	2.2252e-09	1.37571
Ttbk1	0.00386101	0.306263	0.26	0.189	1	1.37566
March1	6.37342e-24	0.635204	0.773	0.562	1.12924e-19	1.37544
Phf20l1	4.87328e-34	0.741468	0.766	0.557	8.63448e-30	1.37522
Arhgef7	6.0283e-19	0.53088	0.574	0.418	1.06809e-14	1.37321
Astn1	5.15341e-24	0.647397	0.685	0.499	9.13082e-20	1.37275
Atl1	0.0140183	0.312583	0.273	0.199	1	1.37186
Als2	4.30013e-05	0.254769	0.203	0.148	0.761898	1.37162
Gap43	5.15887e-10	0.393655	0.439	0.321	9.14048e-06	1.3676
Zfp521	1.73308e-80	1.10193	0.914	0.669	3.07068e-76	1.36622
Il1rapl1	2.45629e-23	0.566409	0.627	0.459	4.35206e-19	1.36601
Tcte2	2.49987e-05	0.347065	0.299	0.219	0.442926	1.3653
Utrn	4.01271e-06	0.277123	0.46	0.338	0.0710972	1.36095
Atp6v0a1	2.89828e-09	0.411404	0.426	0.314	5.13518e-05	1.35669
Zbtb18	5.60419e-10	0.42567	0.408	0.301	9.9295e-06	1.35548
Lgr4	2.47742e-05	0.251154	0.173	0.128	0.43895	1.35156
Ppp2r3a	1.34227e-07	0.425532	0.382	0.283	0.00237823	1.34982
Anks1b	5.09719e-125	1.18288	0.968	0.718	9.0312e-121	1.34819
Dmxl2	2.1698e-15	0.464869	0.524	0.39	3.84446e-11	1.34359
Pkia	6.86472e-10	0.433579	0.479	0.357	1.21629e-05	1.34174
Sptan1	3.29069e-14	0.515209	0.598	0.446	5.83045e-10	1.34081
Adam10	6.68591e-09	0.476548	0.489	0.365	0.000118461	1.33973
Pak7	6.61097e-34	0.566783	0.83	0.62	1.17133e-29	1.33871
Nrcam	1.96202e-25	0.557096	0.757	0.566	3.47631e-21	1.33746
Ntm	1.39879e-74	1.35431	0.865	0.647	2.47837e-70	1.33694
Atp2b1	1.12916e-34	0.65943	0.683	0.511	2.00064e-30	1.33659
Gm3764	1.2548e-10	0.319499	0.406	0.304	2.22325e-06	1.33553
Adcy5	5.73653e-08	0.285112	0.322	0.242	0.0010164	1.33058
Ppm1l	1.43766e-11	0.481548	0.606	0.456	2.54724e-07	1.32895
Dcx	3.5841e-21	0.531696	0.704	0.53	6.35031e-17	1.3283
Dock3	3.13919e-30	0.581226	0.732	0.552	5.56202e-26	1.32609
Tnik	1.35587e-97	1.07726	0.969	0.731	2.40232e-93	1.32558
Frmd5	5.44914e-15	0.526709	0.676	0.51	9.65478e-11	1.32549
Osbpl6	0.0046029	0.331453	0.314	0.237	1	1.32489
Mical3	8.80594e-10	0.384592	0.38	0.287	1.56024e-05	1.32404
Adgrl3	4.95121e-48	0.701067	0.878	0.664	8.77255e-44	1.32229
Fam19a5	2.63881e-11	0.498464	0.472	0.357	4.67544e-07	1.32213
Osbp2	2.06719e-10	0.406375	0.537	0.407	3.66265e-06	1.31941
Sptbn1	1.56128e-12	0.326293	0.699	0.53	2.76628e-08	1.31887
Osbpl9	9.87719e-12	0.41277	0.458	0.348	1.75004e-07	1.31609
Crtc3	0.000791376	0.282089	0.313	0.238	1	1.31513
Rab6b	4.11305e-07	0.363854	0.552	0.42	0.00728751	1.31429
Uncx	4.88778e-07	0.276919	0.307	0.234	0.00866017	1.31197
Dclk1	2.87771e-21	0.536738	0.787	0.601	5.09873e-17	1.30948
Cntnap2	1.63067e-15	0.501899	0.765	0.586	2.88922e-11	1.30546
Carmil3	5.51955e-07	0.271778	0.265	0.203	0.00977953	1.30542
Nexmif	0.00305194	0.274482	0.318	0.245	1	1.29796
Fut9	5.14961e-10	0.442991	0.572	0.441	9.12407e-06	1.29705
Cask	1.18282e-34	0.675268	0.804	0.621	2.09572e-30	1.29469
Gabrb3	7.80312e-11	0.462926	0.645	0.499	1.38256e-06	1.29258
Negr1	1.12156e-33	0.649257	0.835	0.646	1.98717e-29	1.29257
Pax6	8.64833e-14	0.413771	0.581	0.45	1.53231e-09	1.29111
Tuba1a	9.13322e-07	0.407435	0.519	0.402	0.0161822	1.29104
Kif1a	1.53209e-09	0.347378	0.47	0.365	2.71455e-05	1.28767
Ttc7b	8.52119e-06	0.353501	0.336	0.261	0.150978	1.28736
Tnrc6c	1.17012e-10	0.493892	0.629	0.489	2.07321e-06	1.2863
Ctps2	4.7695e-07	0.29471	0.279	0.217	0.0084506	1.28571
Dctn1	3.81307e-08	0.277899	0.266	0.207	0.000675599	1.28502
Macrod2	3.89612e-56	0.821292	0.893	0.695	6.90314e-52	1.28489
Smarca2	1.08196e-05	0.286683	0.398	0.31	0.191701	1.28387
Trpc4ap	0.000200931	0.297032	0.294	0.229	1	1.28384
Rtn1	1.21573e-12	0.440071	0.657	0.513	2.15403e-08	1.2807
Plcl1	3.75695e-17	0.297486	0.518	0.405	6.65656e-13	1.27901
Eml1	0.00434283	0.291009	0.294	0.23	1	1.27826
Asxl3	1.0426e-07	0.426747	0.548	0.429	0.00184728	1.27739
Hectd4	4.40839e-16	0.489621	0.641	0.503	7.81079e-12	1.27435
Tmem63b	6.97755e-08	0.323947	0.391	0.307	0.00123628	1.27362
Nav3	1.63174e-55	0.729493	0.95	0.746	2.89111e-51	1.27346
Ahcyl2	1.25598e-06	0.269347	0.343	0.27	0.0222534	1.27037
Ptprn2	2.43205e-15	0.353165	0.668	0.526	4.30911e-11	1.26996
Gm4258	9.63966e-26	0.567363	0.739	0.582	1.70795e-21	1.26976
Gm28047	0.000772594	0.334332	0.372	0.293	1	1.26962
Glcci1	2.05948e-06	0.296707	0.368	0.29	0.0364898	1.26897
Gtdc1	3.34385e-17	0.386531	0.685	0.54	5.92463e-13	1.26852
Purg	0.000505981	0.339244	0.449	0.354	1	1.26836
Map1b	1.30676e-20	0.551275	0.823	0.649	2.31532e-16	1.2681
Itsn1	2.16045e-19	0.50443	0.675	0.533	3.82788e-15	1.26642
Pde4b	2.57603e-13	0.451544	0.655	0.519	4.5642e-09	1.26204
Gucy1a2	1.86365e-08	0.337462	0.472	0.374	0.000330202	1.26203
Wnk2	2.97355e-07	0.258247	0.458	0.363	0.00526853	1.26171
Synj1	0.00137817	0.265525	0.303	0.241	1	1.25726
Usp32	0.001025	0.344463	0.417	0.333	1	1.25225
Ncoa7	9.73378e-07	0.290221	0.398	0.318	0.0172463	1.25157
Cdh13	8.08818e-06	0.372128	0.484	0.387	0.143306	1.25065
Rasgef1b	1.79543e-16	0.428004	0.741	0.593	3.18115e-12	1.24958
Stau2	1.06513e-08	0.342252	0.539	0.432	0.00018872	1.24768
Ulk2	0.000904766	0.280508	0.358	0.287	1	1.24739
Git2	4.6376e-09	0.345575	0.518	0.416	8.2169e-05	1.24519
Arhgef9	6.27552e-05	0.252643	0.265	0.213	1	1.24413
Ice1	0.00218641	0.269262	0.352	0.283	1	1.24382
Gria2	2.22057e-38	0.613137	0.911	0.733	3.9344e-34	1.24284
Kcnb2	1.78321e-59	0.716718	0.963	0.775	3.15949e-55	1.24258
Vezt	6.1185e-09	0.319389	0.465	0.375	0.000108408	1.24
Peli2	5.76476e-38	0.595666	0.814	0.657	1.0214e-33	1.23896
Sox5	9.0491e-27	0.600233	0.856	0.694	1.60332e-22	1.23343
Srgap2	1.98397e-36	0.599511	0.846	0.686	3.51519e-32	1.23324
Rabgap1l	3.98299e-12	0.363714	0.558	0.453	7.05705e-08	1.23179
Gpr137c	1.22304e-06	0.328939	0.452	0.367	0.0216697	1.23161
Ptprk	6.10159e-12	0.471168	0.666	0.541	1.08108e-07	1.23105
Xkr6	2.10002e-08	0.258755	0.525	0.428	0.000372082	1.22664
Dopey1	0.0335092	0.252184	0.371	0.303	1	1.22442
Ankrd44	5.20775e-06	0.302656	0.524	0.428	0.092271	1.2243
Mapk10	5.30448e-08	0.330753	0.748	0.611	0.000939848	1.22422
Cpe	8.12465e-08	0.34379	0.558	0.457	0.00143952	1.22101
Lpgat1	0.00333782	0.3063	0.362	0.297	1	1.21885
Cdk14	5.17474e-50	0.633305	0.859	0.705	9.16861e-46	1.21844
Grid1	1.08332e-05	0.252784	0.549	0.451	0.191942	1.21729
Adam22	2.01352e-14	0.335814	0.598	0.492	3.56756e-10	1.21545
Dip2b	2.75347e-08	0.487604	0.649	0.534	0.00048786	1.21536
Snap25	1.55656e-08	0.397841	0.685	0.564	0.000275791	1.21454
Senp7	6.75533e-05	0.320224	0.5	0.412	1	1.21359
Nell2	7.84311e-11	0.418915	0.651	0.537	1.38964e-06	1.21229
Chd9	1.12738e-09	0.285058	0.515	0.426	1.9975e-05	1.20892
Nkain3	5.89057e-13	0.292632	0.673	0.557	1.04369e-08	1.20826
Plcb1	9.76412e-11	0.282189	0.871	0.721	1.73001e-06	1.20804
Pcnx	0.0323788	0.274603	0.408	0.338	1	1.2071
Rbfox1	2.20049e-156	1.35436	0.992	0.822	3.89883e-152	1.20681
Ssbp3	8.2455e-06	0.392116	0.663	0.551	0.146094	1.20327
Pik3r3	1.03281e-07	0.282753	0.521	0.433	0.00182994	1.20323
Rab3c	3.24623e-06	0.289733	0.593	0.493	0.0575167	1.20284
Kcnq3	6.88194e-06	0.266571	0.475	0.395	0.121934	1.20253
Afdn	1.14608e-10	0.395853	0.698	0.581	2.03062e-06	1.20138
Mast2	8.85453e-14	0.348715	0.613	0.511	1.56885e-09	1.19961
Ppp6r2	0.000851562	0.262258	0.384	0.321	1	1.19626
Csnk1g1	3.82334e-05	0.29134	0.507	0.424	0.677419	1.19575
Mpped2	0.000150183	0.285033	0.479	0.401	1	1.19451
Jakmip2	4.77927e-05	0.267554	0.516	0.433	0.846792	1.19169
Scai	2.06949e-05	0.281902	0.419	0.352	0.366671	1.19034
Cadps	7.36503e-57	0.712581	0.95	0.8	1.30494e-52	1.1875
Syn2	0.0122751	0.266493	0.443	0.374	1	1.18449
Nedd4l	5.08532e-45	0.607077	0.933	0.789	9.01018e-41	1.18251
Pde3a	6.95422e-07	0.341083	0.655	0.555	0.0123215	1.18018
Aff3	1.28634e-22	0.468036	0.875	0.742	2.27913e-18	1.17925
Dync1i2	5.96647e-06	0.27946	0.492	0.418	0.105714	1.17703
Plekha5	1.14419e-08	0.340538	0.665	0.565	0.000202728	1.17699
Exoc6b	7.33323e-07	0.302256	0.688	0.585	0.012993	1.17607
Gramd1b	3.23623e-19	0.490735	0.879	0.752	5.73395e-15	1.16888
Camta1	8.03785e-14	0.370199	0.734	0.629	1.42415e-09	1.16693
Fnbp1l	3.32052e-06	0.266762	0.585	0.502	0.058833	1.16534
Edil3	1.08884e-11	0.30254	0.746	0.642	1.92921e-07	1.16199
Srrm4	1.3614e-12	0.29048	0.804	0.694	2.41213e-08	1.1585
Fmnl2	3.32775e-24	0.532751	0.845	0.731	5.89611e-20	1.15595
Gria4	2.28723e-70	0.759411	0.972	0.841	4.05251e-66	1.15577
Mmp16	4.4919e-10	0.295218	0.705	0.61	7.95875e-06	1.15574
Jarid2	1.82738e-13	0.351533	0.715	0.619	3.23775e-09	1.15509
Nbea	2.95253e-100	0.907009	0.969	0.839	5.2313e-96	1.15495
Rev3l	2.0517e-07	0.261274	0.604	0.523	0.0036352	1.15488
Ptprs	4.79798e-24	0.460512	0.899	0.779	8.50105e-20	1.15404
Clasp2	1.81814e-07	0.331248	0.724	0.628	0.00322138	1.15287
Apc	4.72769e-17	0.41366	0.89	0.774	8.37652e-13	1.14987
Fam168a	5.11366e-05	0.263304	0.502	0.437	0.906039	1.14874
Zic1	3.82267e-09	0.311404	0.673	0.586	6.773e-05	1.14846
Kat6b	7.90634e-08	0.285654	0.665	0.584	0.00140085	1.1387
Scn8a	3.57111e-07	0.255094	0.73	0.644	0.00632729	1.13354
Ccser1	3.75048e-87	0.848663	0.988	0.872	6.6451e-83	1.13303
Prkcb	6.72785e-23	0.42797	0.938	0.829	1.19204e-18	1.13148
Macf1	1.46353e-16	0.360409	0.844	0.746	2.59308e-12	1.13137
Rbfox3	1.29798e-70	0.711919	0.984	0.873	2.29976e-66	1.12715
Ppp3ca	7.35834e-28	0.478261	0.888	0.788	1.30375e-23	1.1269
Pde4d	3.76219e-170	1.36089	0.999	0.887	6.66584e-166	1.12627
Enox1	1.34515e-06	0.27833	0.83	0.737	0.0238333	1.12619
Gnaq	2.66306e-08	0.306659	0.766	0.681	0.000471841	1.12482
Kif1b	6.00107e-23	0.417383	0.86	0.765	1.06327e-18	1.12418
Astn2	1.14919e-50	0.603638	0.982	0.877	2.03613e-46	1.11973
Ctnna2	3.68004e-55	0.617943	0.986	0.881	6.5203e-51	1.11918
Reln	1.4793e-54	0.692059	0.977	0.874	2.62103e-50	1.11785
Ank2	8.47143e-149	1.09482	0.996	0.892	1.50097e-144	1.11659
Nol4	1.26975e-19	0.405601	0.881	0.792	2.24974e-15	1.11237
Foxp1	3.3239e-08	0.262298	0.833	0.756	0.000588929	1.10185
Erbb4	2.3264e-125	1.00998	0.999	0.908	4.12192e-121	1.10022
Nrxn1	3.09936e-129	0.949069	0.999	0.912	5.49145e-125	1.09539
Map2	4.43062e-15	0.256778	0.911	0.837	7.85017e-11	1.08841
Ext1	1.91953e-13	0.403029	0.825	0.76	3.40102e-09	1.08553
Lsamp	3.11645e-137	1.0066	0.999	0.923	5.52172e-133	1.08234
Grik2	2.25781e-144	1.03595	0.999	0.941	4.00038e-140	1.06164
Celf2	5.25233e-121	0.86632	0.999	0.959	9.30607e-117	1.04171
Chd7	1.33193e-24	0.351134	0.985	0.95	2.35992e-20	1.03684
Auts2	1.51995e-88	0.638846	0.999	0.97	2.69304e-84	1.0299
Nfia	1.21948e-63	-0.488939	0.997	0.995	2.16068e-59	1.00201
Malat1	3.48601e-42	0.296916	1	1	6.17651e-38	1
mt-Rnr2	3.30062e-49	-0.58411	0.99	0.994	5.84803e-45	0.995976
Akap6	1.53071e-27	-0.489679	0.941	0.946	2.71212e-23	0.994714
Setbp1	8.00693e-12	-0.308344	0.938	0.945	1.41867e-07	0.992592
mt-Rnr1	9.24519e-45	-0.623865	0.982	0.992	1.63806e-40	0.989919
Nav1	1.6986e-08	-0.287309	0.84	0.858	0.000300959	0.979021
Zmiz1	0.00384635	-0.276782	0.828	0.847	1	0.977568
Miat	4.42758e-06	-0.485079	0.702	0.724	0.0784479	0.969613
Rora	1.68861e-12	-0.432832	0.882	0.924	2.99188e-08	0.954545
Myo16	3.57642e-08	-0.365635	0.786	0.825	0.00063367	0.952727
Nalcn	0.678049	-0.25185	0.514	0.54	1	0.951852
Hs3st5	0.000155098	-0.385347	0.745	0.788	1	0.945431
Map3k1	1.60839e-42	-0.578559	0.889	0.941	2.84975e-38	0.94474
Nlgn1	5.22586e-13	-0.476014	0.801	0.848	9.25918e-09	0.944575
Dock4	2.88641e-07	-0.304549	0.777	0.825	0.00511414	0.941818
Exoc4	0.0254839	-0.260545	0.722	0.773	1	0.934023
Fgfr2	2.14378e-14	-0.364084	0.823	0.882	3.79835e-10	0.933106
Dcc	5.35164e-115	-1.41023	0.914	0.987	9.48204e-111	0.926038
Plekha6	0.736801	-0.26582	0.523	0.565	1	0.925664
Pak3	0.000386067	-0.3422	0.565	0.612	1	0.923202
Cmss1	1.92147e-38	-0.929353	0.88	0.957	3.40447e-34	0.91954
Sfpq	2.56109e-09	-0.280625	0.708	0.772	4.53774e-05	0.917098
Tcf12	1.15638e-09	-0.296711	0.762	0.831	2.04887e-05	0.916967
Ankrd11	0.00269634	-0.266323	0.657	0.717	1	0.916318
Phip	2.86283e-09	-0.293115	0.706	0.771	5.07236e-05	0.915694
Ralgps2	0.0151283	-0.286405	0.461	0.505	1	0.912871
Dach1	1.60487e-07	-0.313898	0.649	0.712	0.00284351	0.911517
Arid1b	9.43246e-19	-0.382793	0.778	0.856	1.67124e-14	0.908878
Ncoa1	2.03008e-07	-0.300204	0.599	0.66	0.00359689	0.907576
Lrba	0.00038219	-0.324283	0.635	0.7	1	0.907143
Rfx3	3.46632e-07	-0.277182	0.688	0.759	0.00614162	0.906456
Hnrnpa2b1	2.3794e-06	-0.326156	0.664	0.735	0.0421582	0.903401
Map4k4	5.30976e-29	-0.515718	0.784	0.868	9.40783e-25	0.903226
Gm42418	2.1196e-24	-0.673123	0.827	0.916	3.75551e-20	0.902838
Son	4.5432e-08	-0.258822	0.64	0.71	0.000804965	0.901408
Cmip	0.00710156	-0.252966	0.438	0.486	1	0.901234
Grid2	2.35627e-06	-0.482677	0.638	0.71	0.0417484	0.898591
Fosb	0.131823	-0.272453	0.271	0.302	1	0.897351
Ankrd17	5.6492e-06	-0.256264	0.569	0.636	0.100093	0.894654
Prrc2b	4.79162e-05	-0.268441	0.571	0.639	0.84898	0.893584
Acaca	7.70547e-06	-0.255192	0.485	0.543	0.136526	0.893186
Hnrnpu	1.16366e-08	-0.365489	0.666	0.747	0.000206177	0.891566
Zcchc7	9.02564e-05	-0.265446	0.529	0.594	1	0.890572
Pbx1	1.31384e-26	-0.527385	0.772	0.869	2.32786e-22	0.888377
Birc6	1.01849e-06	-0.290648	0.626	0.705	0.0180455	0.887943
Phf21a	5.24777e-06	-0.324724	0.657	0.742	0.09298	0.885445
Dock9	0.159188	-0.31198	0.138	0.156	1	0.884615
Fus	0.00015678	-0.270753	0.539	0.61	1	0.883606
Hsp90ab1	3.74139e-06	-0.34776	0.572	0.648	0.0662899	0.882716
Pcm1	1.88405e-09	-0.309777	0.639	0.724	3.33816e-05	0.882597
Pum1	2.38667e-06	-0.31104	0.611	0.693	0.042287	0.881674
Eif4g2	2.7492e-05	-0.298765	0.561	0.637	0.487103	0.880691
Nsd1	3.54046e-09	-0.273819	0.615	0.7	6.27299e-05	0.878571
Csnk1a1	7.73864e-06	-0.29116	0.505	0.575	0.137113	0.878261
Gm26917	5.23043e-07	-0.415317	0.576	0.656	0.00926727	0.878049
Sik3	5.62797e-05	-0.253502	0.493	0.562	0.997163	0.877224
Chd2	4.44547e-05	-0.282528	0.512	0.584	0.787649	0.876712
Arid1a	7.06345e-05	-0.275461	0.509	0.581	1	0.876076
Mllt10	1.59472e-09	-0.350951	0.615	0.702	2.82553e-05	0.876068
Tbc1d16	0.000130723	-0.330946	0.459	0.524	1	0.875954
Ptprg	8.66636e-22	-0.718056	0.736	0.841	1.53551e-17	0.875149
Eif4g3	1.23876e-07	-0.327149	0.613	0.701	0.00219483	0.874465
Pou2f1	0.00106376	-0.266389	0.456	0.522	1	0.873563
Rbm25	3.62805e-13	-0.39715	0.675	0.776	6.42818e-09	0.869845
Wnk1	0.00906227	-0.281463	0.517	0.595	1	0.868907
Smyd3	0.00100945	-0.285972	0.467	0.538	1	0.86803
Matr3	7.33707e-05	-0.308127	0.469	0.542	1	0.865313
Setd5	0.000562289	-0.310652	0.545	0.63	1	0.865079
Huwe1	4.67862e-12	-0.445743	0.673	0.778	8.28958e-08	0.865038
Nsd2	3.0282e-10	-0.414989	0.555	0.642	5.36536e-06	0.864486
Chd4	1.50823e-12	-0.352004	0.603	0.698	2.67228e-08	0.863897
Rbm26	0.0143118	-0.258209	0.45	0.521	1	0.863723
Dyrk1a	9.64278e-05	-0.316433	0.49	0.568	1	0.862676
Chd6	3.34731e-11	-0.339449	0.608	0.706	5.93076e-07	0.86119
Tet3	2.39092e-08	-0.283735	0.447	0.52	0.000423623	0.859615
Dennd1a	9.63776e-06	-0.36332	0.593	0.69	0.170762	0.85942
Arl15	7.8663e-07	-0.353606	0.541	0.63	0.0139375	0.85873
Sncaip	1.87792e-06	-0.287308	0.389	0.453	0.033273	0.858719
Mex3a	0.0876297	-0.257671	0.363	0.423	1	0.858156
Pbx3	9.50622e-34	-0.69353	0.727	0.848	1.68431e-29	0.857311
Prrc2c	7.32577e-09	-0.40898	0.628	0.733	0.000129798	0.856753
Naaladl2	0.000287781	-0.276776	0.358	0.418	1	0.856459
Neo1	8.04288e-09	-0.422238	0.553	0.646	0.000142504	0.856037
Spen	0.00438205	-0.261898	0.397	0.464	1	0.855603
Tra2a	1.06584e-05	-0.250661	0.386	0.452	0.188846	0.853982
Fubp1	2.34154e-07	-0.330074	0.543	0.636	0.00414873	0.853773
Cnot1	1.53057e-05	-0.291581	0.484	0.567	0.271187	0.853615
Nedd4	4.03763e-18	-0.4988	0.691	0.81	7.15388e-14	0.853086
Syncrip	6.24498e-05	-0.337657	0.458	0.537	1	0.852886
Bclaf1	5.65106e-05	-0.26962	0.451	0.529	1	0.852552
Kcnq1ot1	1.54753e-15	-0.470901	0.642	0.754	2.74192e-11	0.851459
Rbms1	0.000151752	-0.387429	0.488	0.574	1	0.850174
Hnrnpc	0.00532554	-0.251076	0.363	0.427	1	0.850117
Mbnl1	0.00186241	-0.263424	0.387	0.456	1	0.848684
Ewsr1	3.7479e-07	-0.308342	0.467	0.551	0.00664052	0.84755
Trim24	0.00523598	-0.263108	0.357	0.422	1	0.845971
Kcnip4	0.777173	-0.454819	0.191	0.226	1	0.845132
Srcap	7.0231e-10	-0.315585	0.474	0.561	1.24435e-05	0.84492
Gm38394	0.00038566	-0.251733	0.392	0.464	1	0.844827
Tgfb2	0.00316455	-0.272877	0.282	0.334	1	0.844311
Actb	2.07386e-09	-0.398856	0.53	0.628	3.67447e-05	0.843949
Gm20388	1.12873e-08	-0.376883	0.496	0.589	0.000199988	0.842105
Srek1	1.4479e-08	-0.331069	0.498	0.592	0.000256539	0.841216
Pdzrn3	0.0204157	-0.303087	0.179	0.213	1	0.840375
Ranbp2	0.000298967	-0.256165	0.34	0.405	1	0.839506
Disp3	0.00332542	-0.25944	0.234	0.279	1	0.838709
Taf15	5.67234e-05	-0.303262	0.388	0.463	1	0.838013
Dapk1	0.000299548	-0.324421	0.424	0.506	1	0.837944
Lcorl	8.26859e-05	-0.319468	0.408	0.487	1	0.837782
Slc10a7	9.2821e-05	-0.252327	0.346	0.413	1	0.837772
Srsf11	0.174374	-0.252289	0.366	0.437	1	0.837528
Zfp704	9.10102e-11	-0.592367	0.587	0.701	1.61252e-06	0.837375
Cdk19	2.53008e-05	-0.3287	0.408	0.488	0.448279	0.836065
Pcsk2	0.000634173	-0.281491	0.315	0.377	1	0.835544
Tpr	0.0025313	-0.312018	0.425	0.509	1	0.83497
Cbfa2t2	1.68444e-06	-0.397083	0.444	0.532	0.029845	0.834586
Nlk	0.000276845	-0.255124	0.335	0.402	1	0.833333
Fam120a	0.000107255	-0.29325	0.398	0.478	1	0.832636
Zeb1	2.1416e-84	-1.0373	0.791	0.95	3.79449e-80	0.832631
Srrm1	0.000163462	-0.287471	0.382	0.459	1	0.832244
Rngtt	2.43603e-07	-0.26243	0.366	0.44	0.00431616	0.831818
Hnrnpm	0.0307994	-0.328767	0.43	0.517	1	0.831721
Ghr	0.176065	-0.312096	0.239	0.288	1	0.829861
Zfr	0.00962523	-0.285091	0.385	0.464	1	0.829741
Gpbp1	3.90701e-05	-0.29614	0.37	0.447	0.692245	0.82774
Cacng2	2.74423e-11	-0.558633	0.537	0.649	4.86222e-07	0.827427
Npas3	1.81849e-05	-0.587437	0.391	0.473	0.322199	0.826638
Pds5b	5.50854e-10	-0.420568	0.508	0.615	9.76003e-06	0.826016
Sipa1l2	0.0961606	-0.351803	0.311	0.377	1	0.824933
Tle4	0.0220517	-0.277705	0.348	0.422	1	0.824644
Ski	0.0275158	-0.293365	0.324	0.393	1	0.824427
Rsrc2	0.00992101	-0.261974	0.357	0.434	1	0.82258
Ctnnd1	0.00430009	-0.280234	0.31	0.377	1	0.822281
Asxl1	0.0120067	-0.310263	0.344	0.419	1	0.821002
Nck2	0.000369551	-0.319016	0.366	0.446	1	0.820628
Arhgef12	4.38441e-10	-0.35192	0.425	0.518	7.7683e-06	0.820463
Fxr1	0.00498882	-0.266904	0.324	0.395	1	0.820253
Bdp1	0.00252582	-0.252164	0.319	0.389	1	0.820051
Sacs	7.86346e-06	-0.374567	0.405	0.494	0.139325	0.819838
Cux2	0.604622	-0.260417	0.273	0.333	1	0.81982
Thsd7a	1.40575e-33	-0.972114	0.68	0.83	2.49072e-29	0.819277
Ezh2	2.76922e-08	-0.406686	0.444	0.543	0.000490651	0.817679
Ncald	5.38082e-09	-0.479366	0.426	0.521	9.53375e-05	0.817658
Smchd1	1.05135e-12	-0.368183	0.426	0.523	1.86278e-08	0.814531
Ebf3	4.97744e-36	-0.753146	0.66	0.811	8.81903e-32	0.81381
Csde1	0.000201542	-0.324907	0.345	0.424	1	0.813679
Mvb12b	1.0477e-06	-0.378239	0.445	0.547	0.0185632	0.813528
Nisch	0.00580858	-0.275952	0.322	0.396	1	0.813131
Stx6	0.00236132	-0.262266	0.278	0.342	1	0.812865
Ccser2	1.47186e-05	-0.324986	0.356	0.438	0.260784	0.812785
Asap2	6.78016e-07	-0.283401	0.308	0.379	0.0120131	0.812665
Dync2h1	5.97479e-07	-0.359595	0.394	0.485	0.0105861	0.812371
Usp24	0.0160596	-0.323085	0.333	0.41	1	0.812195
Pias1	3.94904e-06	-0.251207	0.307	0.378	0.0699692	0.812169
Stag2	3.64397e-11	-0.328318	0.409	0.504	6.45638e-07	0.811508
Prkag2	0.0456333	-0.278013	0.213	0.263	1	0.809886
Tbl1xr1	0.00649165	-0.324092	0.357	0.441	1	0.809524
Elavl1	0.00585843	-0.25549	0.279	0.345	1	0.808695
Eif4g1	1.56296e-06	-0.361559	0.425	0.526	0.0276926	0.807985
Hnrnpk	0.000287691	-0.302225	0.318	0.394	1	0.807106
Nsmce2	0.00257731	-0.376228	0.411	0.51	1	0.805882
Trak1	6.73741e-14	-0.427549	0.433	0.538	1.19373e-09	0.804833
Tmem131	4.60055e-09	-0.451648	0.478	0.594	8.15126e-05	0.804714
Spats2	0.0127317	-0.271534	0.271	0.337	1	0.804154
Kalrn	7.56962e-08	-0.458625	0.435	0.541	0.00134119	0.804066
Dhx15	7.31424e-07	-0.365763	0.377	0.469	0.0129594	0.803838
Caprin1	7.69416e-09	-0.40004	0.437	0.544	0.000136325	0.803309
Alms1	4.07575e-05	-0.308476	0.313	0.39	0.722142	0.802564
Hipk2	1.15491e-05	-0.361361	0.378	0.471	0.204628	0.802548
Brd3	0.104992	-0.25627	0.267	0.333	1	0.801802
Eri3	0.0155577	-0.253226	0.291	0.363	1	0.801653
Rsrc1	3.40561e-11	-0.431347	0.472	0.589	6.03405e-07	0.801358
Rbbp6	3.81673e-05	-0.357539	0.371	0.463	0.676249	0.801296
Ric1	0.0147109	-0.251277	0.258	0.322	1	0.801242
Sfmbt1	7.4377e-05	-0.293681	0.309	0.386	1	0.800518
Ywhae	1.40965e-08	-0.400279	0.412	0.515	0.000249761	0.8
Kif5b	0.0001628	-0.295421	0.324	0.405	1	0.8
Elf2	1.68916e-06	-0.259427	0.279	0.349	0.0299286	0.799427
Grip1	3.55869e-30	-0.722782	0.671	0.84	6.30528e-26	0.798809
Rapgef6	1.65663e-06	-0.301054	0.345	0.432	0.0293522	0.798611
Tsc22d2	0.000544998	-0.276171	0.299	0.375	1	0.797333
Foxj3	0.00112083	-0.271984	0.27	0.339	1	0.79646
Elavl2	1.83912e-05	-0.366389	0.344	0.432	0.325855	0.796296
Rai1	8.91008e-14	-0.574471	0.527	0.662	1.57869e-09	0.796072
Qk	1.35175e-11	-0.690349	0.495	0.622	2.39503e-07	0.79582
Atrnl1	8.71963e-08	-0.449167	0.439	0.552	0.00154494	0.79529
Syne2	1.67809e-21	-0.593614	0.554	0.697	2.97324e-17	0.794835
Rassf4	4.50262e-09	-0.423411	0.36	0.453	7.97775e-05	0.794702
Lhx1os	0.290189	-0.278871	0.232	0.292	1	0.79452
Iws1	1.2792e-05	-0.254002	0.254	0.32	0.226648	0.79375
Lrrc8d	1.27522e-06	-0.325541	0.28	0.353	0.0225944	0.793201
Pds5a	1.2502e-08	-0.42184	0.441	0.556	0.00022151	0.793165
Cdk5rap2	3.87812e-05	-0.468535	0.391	0.493	0.687125	0.793103
Asxl2	2.37908e-05	-0.326204	0.354	0.447	0.421525	0.791946
Sf1	0.00452826	-0.298159	0.311	0.393	1	0.791348
Tmeff2	2.16491e-17	-0.696264	0.534	0.675	3.83579e-13	0.791111
Tra2b	0.00408997	-0.332325	0.314	0.397	1	0.790932
Dhx9	2.11974e-05	-0.434306	0.431	0.545	0.375576	0.790826
Rbpj	0.00012764	-0.333242	0.316	0.4	1	0.79
Lims1	1.09209e-08	-0.383014	0.364	0.461	0.000193497	0.789588
Ilf3	5.39689e-06	-0.299461	0.307	0.389	0.095622	0.789203
Supt3	0.013147	-0.276032	0.239	0.303	1	0.788779
Slc1a3	0.00717504	-0.481571	0.306	0.388	1	0.78866
Ckap5	0.000558445	-0.454119	0.348	0.442	1	0.78733
Chd1	2.36711e-05	-0.272475	0.266	0.338	0.419404	0.786982
Cdc27	0.0116043	-0.276486	0.258	0.328	1	0.786585
Zc3h12b	2.39844e-06	-0.292191	0.268	0.341	0.0424955	0.785924
Xpo6	0.0228941	-0.280688	0.271	0.345	1	0.785507
Kcnh8	1.0255e-05	-0.28697	0.198	0.253	0.181698	0.782608
Zfand6	0.000119327	-0.296993	0.259	0.331	1	0.782477
Mier1	0.0186038	-0.268112	0.24	0.307	1	0.781759
Tcerg1	6.09439e-05	-0.39875	0.397	0.508	1	0.781496
Wasf3	0.027868	-0.310966	0.289	0.37	1	0.781081
Bmpr1a	2.29402e-11	-0.338812	0.335	0.429	4.06455e-07	0.780886
Smc1a	0.00757959	-0.327325	0.317	0.406	1	0.780788
Dab2ip	0.00048911	-0.264949	0.199	0.255	1	0.780392
Farp1	6.70163e-06	-0.378905	0.337	0.432	0.11874	0.780092
Tardbp	5.48923e-08	-0.33482	0.314	0.403	0.000972582	0.779156
Rasal2	3.25192e-06	-0.383984	0.342	0.439	0.0576175	0.779043
Lhx1	0.00845016	-0.328	0.236	0.303	1	0.778878
Adamts6	1.2491e-07	-0.469719	0.394	0.506	0.00221316	0.778656
Snd1	7.55472e-09	-0.458652	0.411	0.528	0.000133854	0.778409
Foxp2	1.80131e-46	-0.943928	0.644	0.828	3.19156e-42	0.777778
Igfbpl1	0.0338397	-0.3269	0.252	0.324	1	0.777778
Mib1	7.11887e-10	-0.424812	0.391	0.503	1.26132e-05	0.777336
Pcbp2	4.62214e-07	-0.327113	0.3	0.386	0.00818951	0.777202
Vps37b	3.90154e-08	-0.37282	0.331	0.426	0.000691274	0.776995
Pcf11	1.25082e-05	-0.27069	0.233	0.3	0.22162	0.776666
Anapc1	0.0023074	-0.266741	0.263	0.339	1	0.775811
Nrip1	0.000793492	-0.262719	0.207	0.267	1	0.775281
Ivns1abp	2.12003e-10	-0.418249	0.358	0.462	3.75627e-06	0.774892
Prrc2a	3.87663e-06	-0.422979	0.385	0.497	0.0686862	0.774648
Nup210	0.00210845	-0.292325	0.219	0.283	1	0.773851
Brd8	1.15721e-07	-0.370769	0.325	0.42	0.00205034	0.773809
Itgav	0.048463	-0.25432	0.222	0.287	1	0.773519
Smc5	0.000253398	-0.358456	0.321	0.415	1	0.773494
Babam2	9.90549e-05	-0.39131	0.324	0.419	1	0.77327
Smarcc1	5.38642e-10	-0.492908	0.443	0.573	9.54367e-06	0.773124
Ppp2r2a	0.000629602	-0.279922	0.245	0.317	1	0.77287
Cdkal1	2.06903e-12	-0.52307	0.483	0.625	3.6659e-08	0.7728
Ttll5	7.22497e-05	-0.342438	0.316	0.409	1	0.772616
Smc6	5.60991e-05	-0.349866	0.282	0.365	0.993963	0.772603
Exoc2	4.84667e-08	-0.480338	0.379	0.491	0.000858732	0.771894
Pibf1	0.00202426	-0.259205	0.247	0.32	1	0.771875
Prpf38b	3.71059e-05	-0.278916	0.255	0.331	0.657443	0.770393
Eef2	9.05139e-05	-0.33898	0.278	0.361	1	0.770083
Baz1b	8.18943e-09	-0.474078	0.404	0.525	0.0001451	0.769524
Snx25	0.000663828	-0.252664	0.2	0.26	1	0.76923
Wwox	8.04036e-16	-0.656786	0.502	0.653	1.42459e-11	0.768759
Fip1l1	9.30321e-05	-0.302546	0.289	0.376	1	0.768617
Abl1	3.58756e-05	-0.280798	0.229	0.298	0.635644	0.768456
Fgd6	0.00175337	-0.382853	0.305	0.397	1	0.768262
Hnrnpr	5.01349e-05	-0.394449	0.354	0.461	0.88829	0.767896
Hnrnpl	0.00216624	-0.383066	0.304	0.396	1	0.767677
Ctdspl2	0.000977056	-0.266679	0.218	0.284	1	0.767605
Dnmt3a	0.000435432	-0.270199	0.221	0.288	1	0.767361
Zfp106	0.00218438	-0.280784	0.24	0.313	1	0.766773
Cadm1	2.8661e-55	-0.969515	0.641	0.836	5.07816e-51	0.766746
Myo1b	4.95477e-06	-0.409602	0.23	0.3	0.0877887	0.766666
Uri1	0.000205959	-0.29629	0.236	0.308	1	0.766234
Cecr2	8.67512e-25	-0.66561	0.53	0.692	1.53706e-20	0.765896
Ddx3x	5.75314e-10	-0.40366	0.376	0.491	1.01934e-05	0.765784
Ppp4r3a	0.00028954	-0.289486	0.268	0.35	1	0.765714
Plxnb2	0.000100286	-0.415371	0.306	0.4	1	0.765
Rnf216	0.000601444	-0.263496	0.257	0.336	1	0.764881
Uhrf1bp1l	0.0985763	-0.256595	0.191	0.25	1	0.764
Cstf3	0.170925	-0.33963	0.252	0.33	1	0.763636
Pde1c	1.01148e-61	-1.137	0.664	0.87	1.79214e-57	0.763218
Wapl	9.49023e-06	-0.309587	0.27	0.354	0.168148	0.762712
Lamc1	0.00526745	-0.362702	0.17	0.223	1	0.762331
Thada	0.000385591	-0.371088	0.304	0.399	1	0.761905
Zfp266	8.88197e-06	-0.351295	0.265	0.348	0.157371	0.761494
Arhgap32	9.36091e-07	-0.361489	0.316	0.415	0.0165857	0.761446
Enox2	0.000324677	-0.538472	0.3	0.394	1	0.761421
Cabin1	0.00272725	-0.273533	0.229	0.301	1	0.760797
Cenpc1	4.02821e-05	-0.327436	0.238	0.313	0.713718	0.760383
Sh3d19	0.0104202	-0.315256	0.165	0.217	1	0.760368
Galnt1	0.00268907	-0.270823	0.206	0.271	1	0.760147
Xpo4	1.15075e-05	-0.277853	0.231	0.304	0.203889	0.759868
Hnrnpul1	1.61391e-05	-0.368739	0.303	0.399	0.285953	0.759398
Efna5	5.16575e-06	-0.584882	0.406	0.535	0.0915267	0.758878
Bcat1	0.00957576	-0.252064	0.181	0.239	1	0.757322
Hsd17b12	0.0217144	-0.26449	0.212	0.28	1	0.757143
Vwa8	4.02009e-05	-0.277058	0.205	0.271	0.712279	0.756457
Mad1l1	0.000940388	-0.309821	0.236	0.312	1	0.75641
Spop	0.00528367	-0.258787	0.211	0.279	1	0.756272
Nup153	0.000440773	-0.367528	0.273	0.361	1	0.756232
Thrap3	1.42122e-06	-0.433224	0.347	0.459	0.0251813	0.755991
Ddx39b	2.96252e-05	-0.408185	0.322	0.426	0.524899	0.755868
Scaf11	1.08823e-06	-0.363091	0.294	0.389	0.0192813	0.755784
Txnrd1	0.000858963	-0.25493	0.204	0.27	1	0.755555
Cttnbp2	0.00248229	-0.3357	0.216	0.286	1	0.755244
Ubap2	5.11376e-08	-0.370174	0.289	0.383	0.000906057	0.754569
Ddr1	9.11044e-05	-0.344453	0.236	0.313	1	0.753993
Gas2	0.0659157	-0.275073	0.183	0.243	1	0.753086
Btaf1	0.000823296	-0.324844	0.265	0.352	1	0.752841
Cblb	9.86259e-13	-0.533231	0.405	0.538	1.74745e-08	0.752788
Chka	0.00065825	-0.262074	0.204	0.271	1	0.752767
Supt16	0.00211911	-0.374876	0.283	0.376	1	0.752659
Naa15	0.00107638	-0.387651	0.322	0.428	1	0.752336
Gspt1	0.00159062	-0.294039	0.227	0.302	1	0.751655
Rgs20	2.45601e-09	-0.509805	0.302	0.402	4.35156e-05	0.751244
Sf3b2	1.22903e-09	-0.301401	0.241	0.321	2.1776e-05	0.750779
Mia2	0.00196499	-0.305654	0.241	0.321	1	0.750779
Dennd2a	7.36386e-16	-0.494742	0.369	0.492	1.30473e-11	0.75
Gm11266	2.01684e-05	-0.357679	0.249	0.332	0.357343	0.75
Dleu2	1.25993e-10	-0.461069	0.359	0.479	2.23235e-06	0.749478
Magi3	2.98859e-07	-0.512372	0.359	0.479	0.00529519	0.749478
Dlg1	1.06514e-07	-0.395839	0.322	0.43	0.00188721	0.748837
Ssb	3.35742e-06	-0.313308	0.226	0.302	0.0594868	0.748344
Stxbp4	0.00638538	-0.316362	0.223	0.298	1	0.748322
Mphosph8	4.7307e-05	-0.271085	0.199	0.266	0.838186	0.74812
Ss18	0.000670897	-0.254412	0.19	0.254	1	0.748031
Cbfa2t3	5.33927e-17	-0.718014	0.448	0.599	9.46011e-13	0.747913
Prmt3	0.00456877	-0.276808	0.178	0.238	1	0.747899
Cxxc5	6.11356e-07	-0.387079	0.243	0.325	0.010832	0.747692
Dgcr8	0.00225483	-0.262368	0.192	0.257	1	0.747081
Reps1	3.12564e-09	-0.399971	0.301	0.403	5.53801e-05	0.746898
Hcfc1	3.95071e-05	-0.348619	0.277	0.371	0.699987	0.746631
Ipo11	6.8609e-08	-0.338858	0.271	0.363	0.00121561	0.746556
Hnrnpd	1.03638e-07	-0.429955	0.323	0.433	0.00183626	0.745958
Clint1	0.000100319	-0.285322	0.214	0.287	1	0.745644
Slc39a10	2.89203e-05	-0.300358	0.167	0.224	0.512409	0.745535
Cdk4	0.00150761	-0.305253	0.19	0.255	1	0.745098
Nrf1	2.95525e-06	-0.391249	0.312	0.419	0.0523611	0.74463
Srsf4	1.68707e-07	-0.333775	0.236	0.317	0.00298915	0.744479
Smarca5	0.000215037	-0.328349	0.236	0.317	1	0.744479
Lin52	0.00037572	-0.253412	0.189	0.254	1	0.744094
Cdk6	4.14688e-39	-0.92657	0.596	0.801	7.34744e-35	0.74407
C2cd3	1.69588e-06	-0.327485	0.238	0.32	0.0300476	0.74375
Barhl1	2.80453e-07	-0.475742	0.296	0.398	0.00496907	0.743718
Casp8ap2	0.127735	-0.275435	0.174	0.234	1	0.743589
Uhrf2	2.08112e-10	-0.482304	0.371	0.499	3.68733e-06	0.743487
Eif3a	1.5821e-11	-0.477477	0.382	0.514	2.80316e-07	0.743191
Gse1	4.08623e-49	-1.01043	0.627	0.845	7.23998e-45	0.742012
Ilf2	0.000155124	-0.250767	0.184	0.248	1	0.741935
mt-Cytb	1.49323e-06	-0.450994	0.319	0.43	0.0264571	0.74186
Serbp1	1.07808e-06	-0.485996	0.338	0.456	0.0191015	0.741228
Phf21b	3.30611e-05	-0.437351	0.315	0.425	0.585777	0.741176
Hspa4	0.000377054	-0.308246	0.209	0.282	1	0.741134
Kpnb1	0.00344004	-0.324974	0.229	0.309	1	0.7411
Sipa1l3	4.04623e-25	-0.777637	0.512	0.691	7.16911e-21	0.740955
Eif4a2	7.84052e-05	-0.331313	0.234	0.316	1	0.740506
Atp5b	0.00119193	-0.285277	0.171	0.231	1	0.740259
Larp1	7.72299e-06	-0.334472	0.245	0.331	0.136836	0.740181
Egfem1	1.36465e-11	-0.643683	0.356	0.481	2.41788e-07	0.740125
Ptp4a2	5.71392e-05	-0.284652	0.185	0.25	1	0.74
Eif4h	7.73938e-05	-0.290226	0.202	0.273	1	0.739926
Brd2	6.63076e-06	-0.36436	0.275	0.372	0.117484	0.739247
Itgb1	1.277e-09	-0.388471	0.286	0.387	2.26258e-05	0.739018
Hnrnpdl	2.96162e-11	-0.384454	0.3	0.406	5.2474e-07	0.738916
Eml4	1.37517e-06	-0.415149	0.308	0.417	0.0243652	0.738609
Nnat	3.21693e-05	-0.446437	0.243	0.329	0.569975	0.738602
Lpp	1.74352e-14	-0.532512	0.353	0.478	3.08917e-10	0.738494
Bbx	7.83262e-09	-0.483262	0.375	0.508	0.000138778	0.738189
Golim4	5.12351e-05	-0.36028	0.248	0.336	0.907784	0.738095
Ncl	3.29304e-13	-0.569708	0.417	0.565	5.83461e-09	0.738053
Mdn1	3.66249e-08	-0.447888	0.307	0.416	0.00064892	0.737981
Zfp91	2.59445e-06	-0.403398	0.308	0.418	0.0459685	0.736842
Cep112	0.0069003	-0.266059	0.182	0.247	1	0.736842
Gmps	0.000377146	-0.266876	0.165	0.224	1	0.736607
Vav2	2.30559e-06	-0.36599	0.253	0.344	0.0408505	0.735465
Akap10	9.04673e-05	-0.274502	0.183	0.249	1	0.734939
Lhfpl3	0.00389836	-1.12917	0.119	0.162	1	0.734567
Bcl2	4.45425e-05	-0.251927	0.152	0.207	0.789204	0.734299
Cep295	8.06944e-06	-0.30992	0.24	0.327	0.142974	0.733945
Ercc6l2	3.79307e-06	-0.3164	0.19	0.259	0.0672056	0.73359
Ptch1	2.90665e-46	-1.13211	0.6	0.818	5.15001e-42	0.733496
Cbx5	5.77147e-17	-0.574983	0.407	0.555	1.02259e-12	0.733333
Srsf7	4.60462e-07	-0.331142	0.209	0.285	0.00815846	0.733333
Otud4	0.000290121	-0.347377	0.255	0.348	1	0.732758
H2afy	4.38789e-06	-0.380428	0.274	0.374	0.0777447	0.73262
Sgcd	1.05375e-07	-0.748748	0.315	0.43	0.00186703	0.732558
Pcnt	4.44879e-08	-0.345517	0.249	0.34	0.000788237	0.732353
Ahctf1	5.57926e-09	-0.382541	0.245	0.335	9.88533e-05	0.731343
Prkg1	0.0309541	-0.643054	0.125	0.171	1	0.730994
Yes1	0.000256918	-0.273378	0.182	0.249	1	0.730923
Ythdf2	0.00806553	-0.259913	0.16	0.219	1	0.730593
Ssr1	0.000893526	-0.277228	0.168	0.23	1	0.730434
Dcaf1	1.42149e-08	-0.358637	0.241	0.33	0.000251859	0.730303
Luzp1	1.56278e-05	-0.307311	0.189	0.259	0.276892	0.729729
Cdh20	2.04733e-87	-1.38818	0.658	0.902	3.62746e-83	0.72949
Bahcc1	2.73348e-12	-0.613252	0.376	0.516	4.84317e-08	0.728682
Ptcd3	0.0220224	-0.268884	0.188	0.258	1	0.728682
Acvr2b	5.51359e-05	-0.289286	0.181	0.249	0.976898	0.726907
Srsf3	3.65029e-05	-0.4045	0.292	0.402	0.646758	0.726368
Kcnt2	0.000413697	-0.254782	0.138	0.19	1	0.726315
Tcf3	0.00173619	-0.300126	0.183	0.252	1	0.72619
Zc3h12c	6.24693e-06	-0.362777	0.241	0.332	0.110683	0.725903
Eif4b	0.0104019	-0.296501	0.188	0.259	1	0.725868
Ago2	8.54957e-10	-0.406629	0.266	0.367	1.51481e-05	0.724795
Cdc42se2	3.82684e-06	-0.433705	0.27	0.373	0.0678039	0.72386
Ncapd3	7.55987e-09	-0.375675	0.246	0.34	0.000133946	0.723529
Mettl9	0.000613836	-0.257721	0.154	0.213	1	0.723004
Polr2a	0.00158161	-0.361577	0.237	0.328	1	0.722561
Spata5	0.000211829	-0.388139	0.263	0.364	1	0.722527
Chchd3	1.54607e-12	-0.46374	0.346	0.479	2.73933e-08	0.722338
Eif3c	1.49931e-06	-0.289224	0.174	0.241	0.0265647	0.721991
Zfhx3	1.18732e-16	-0.733763	0.459	0.636	2.1037e-12	0.721698
Usp37	4.17302e-05	-0.380283	0.215	0.298	0.739376	0.721476
mt-Nd5	7.43328e-10	-0.453206	0.294	0.408	1.31703e-05	0.720588
Sin3a	0.000240133	-0.291925	0.196	0.272	1	0.720588
Hectd2	0.000621775	-0.355384	0.216	0.3	1	0.72
Rnf220	2.45933e-45	-1.20921	0.514	0.714	4.35744e-41	0.719888
Greb1l	0.000625168	-0.458004	0.203	0.282	1	0.719858
Cep162	8.35936e-06	-0.292907	0.177	0.246	0.148111	0.719512
Tfdp1	0.00646429	-0.295506	0.164	0.228	1	0.719298
Cbx1	8.41731e-08	-0.34003	0.237	0.33	0.00149138	0.718182
Epb41l5	0.00157441	-0.263699	0.135	0.188	1	0.718085
Togaram1	0.0038738	-0.262602	0.15	0.209	1	0.717703
Med1	5.17104e-05	-0.279802	0.188	0.262	0.916205	0.717557
Hnrnpa1	3.80538e-10	-0.353987	0.227	0.317	6.74237e-06	0.716088
Ust	1.24451e-10	-0.643461	0.363	0.507	2.20502e-06	0.715976
Rfc1	7.04991e-05	-0.389969	0.229	0.32	1	0.715625
Gna12	0.002006	-0.348509	0.223	0.312	1	0.714743
Mipol1	0.00483773	-0.308203	0.165	0.231	1	0.714285
Map2k5	2.16558e-09	-0.502081	0.336	0.471	3.83698e-05	0.713376
Lars2	6.0713e-06	-0.425034	0.214	0.3	0.107571	0.713333
Micu1	0.000607884	-0.31398	0.194	0.272	1	0.713235
Mpp6	0.0471932	-0.266944	0.164	0.23	1	0.713043
Azin1	0.00629947	-0.255196	0.149	0.209	1	0.712918
Nono	1.05259e-05	-0.292604	0.186	0.261	0.186497	0.712643
Tox3	1.15501e-25	-0.819147	0.483	0.678	2.04644e-21	0.712389
Tlk1	2.58267e-08	-0.425853	0.304	0.427	0.000457598	0.711944
Atm	0.00960593	-0.415546	0.242	0.34	1	0.711764
Myo1e	0.000261349	-0.308763	0.153	0.215	1	0.711628
Cntnap1	1.42621e-07	-0.469927	0.253	0.356	0.00252696	0.710674
Phkb	0.000107007	-0.374813	0.228	0.321	1	0.71028
Xrcc4	0.000212801	-0.278689	0.161	0.227	1	0.709251
Senp1	9.07722e-08	-0.309971	0.185	0.261	0.0016083	0.708812
Npat	3.89242e-06	-0.285896	0.163	0.23	0.0689659	0.708695
Brpf1	3.59863e-08	-0.322991	0.18	0.254	0.000637605	0.708661
Usp46	7.73966e-07	-0.375016	0.196	0.277	0.0137131	0.707581
Tet2	5.89774e-09	-0.432344	0.275	0.389	0.000104496	0.706941
Ipo8	0.000799608	-0.300745	0.171	0.242	1	0.706611
Lmnb1	2.0202e-10	-0.495967	0.272	0.385	3.57938e-06	0.706493
Robo1	5.52526e-14	-0.722152	0.406	0.575	9.78965e-10	0.706087
Xpo1	1.92324e-12	-0.562983	0.36	0.51	3.40759e-08	0.705882
Eif5	0.00169965	-0.263937	0.168	0.238	1	0.705882
Gm38399	1.82604e-30	-0.806346	0.472	0.669	3.23538e-26	0.705531
Hnrnpab	1.16625e-06	-0.348748	0.189	0.268	0.0206636	0.705224
Zeb2	4.63621e-35	-0.854808	0.508	0.721	8.21443e-31	0.704577
Brd7	0.000134659	-0.340325	0.2	0.284	1	0.704225
Ccnjl	0.0019403	-0.271437	0.157	0.223	1	0.704036
Satb2	2.05714e-08	-0.480489	0.271	0.385	0.000364484	0.703896
Adarb2	2.06283e-24	-0.980166	0.431	0.613	3.65492e-20	0.703099
Ncor2	8.98417e-61	-1.11138	0.573	0.816	1.59182e-56	0.702206
Gm47283	5.57775e-12	-0.63877	0.377	0.537	9.88266e-08	0.702048
Prim2	0.000135155	-0.44516	0.226	0.322	1	0.701863
Vcan	4.15515e-07	-0.538443	0.284	0.405	0.00736209	0.701234
Ezr	0.000260958	-0.337679	0.171	0.244	1	0.700819
Rad21	5.73943e-07	-0.466676	0.262	0.374	0.0101691	0.700535
Pphln1	0.000434188	-0.260591	0.145	0.207	1	0.700483
Srsf6	1.50831e-06	-0.329211	0.201	0.287	0.0267243	0.700348
Nap1l1	2.58312e-08	-0.433229	0.25	0.357	0.000457677	0.70028
Cog7	9.07758e-10	-0.560321	0.338	0.483	1.60837e-05	0.699793
Wasf2	5.07324e-06	-0.318503	0.179	0.256	0.0898877	0.699218
Srsf1	8.22824e-09	-0.269909	0.146	0.209	0.000145788	0.698564
Set	0.000190595	-0.291496	0.164	0.235	1	0.697872
Tead1	3.90576e-36	-0.82449	0.494	0.708	6.92023e-32	0.69774
Prex1	0.00283563	-0.326872	0.15	0.215	1	0.697674
Sh3bgrl	7.93477e-07	-0.307648	0.175	0.251	0.0140588	0.697211
Slc16a2	1.16397e-07	-0.296942	0.145	0.208	0.00206232	0.697115
Filip1l	6.99589e-13	-0.655239	0.31	0.445	1.23953e-08	0.696629
Gas5	3.3641e-05	-0.363017	0.183	0.263	0.596052	0.695817
Zfp462	6.21354e-14	-0.674958	0.384	0.552	1.10092e-09	0.695652
Suz12	2.93958e-06	-0.386095	0.233	0.335	0.0520835	0.695522
Hnrnpa3	1.55408e-12	-0.371714	0.219	0.315	2.75353e-08	0.695238
Gtf3c1	5.49778e-05	-0.515459	0.301	0.433	0.974096	0.69515
Esyt1	0.0350401	-0.264372	0.116	0.167	1	0.69461
Nckap5l	0.00044394	-0.346069	0.184	0.265	1	0.694339
Ipo7	0.000396864	-0.391191	0.218	0.314	1	0.694267
Mcph1	3.36822e-05	-0.490083	0.277	0.399	0.596781	0.694235
Tcp1	0.00152714	-0.262802	0.127	0.183	1	0.693989
Rif1	4.04444e-13	-0.582934	0.315	0.454	7.16595e-09	0.693832
Wdr43	3.92098e-05	-0.404942	0.231	0.333	0.694719	0.693693
Pkm	0.000285169	-0.251136	0.129	0.186	1	0.693548
Ubash3b	2.88461e-05	-0.48046	0.226	0.326	0.511095	0.693251
Peak1	4.30654e-08	-0.505258	0.264	0.381	0.000763033	0.692913
Maml2	5.42671e-54	-0.996974	0.555	0.801	9.61504e-50	0.692884
Cdh12	0.000636674	-0.389667	0.124	0.179	1	0.692737
Nasp	2.26476e-14	-0.616404	0.331	0.478	4.0127e-10	0.692468
Ssrp1	0.00203556	-0.293356	0.153	0.221	1	0.692307
Cbfb	3.10604e-10	-0.416803	0.222	0.321	5.50328e-06	0.691589
Atr	5.45697e-05	-0.305749	0.168	0.243	0.966866	0.691358
Stk39	9.86729e-10	-0.453506	0.232	0.336	1.74829e-05	0.690476
Col11a1	7.88836e-14	-0.701453	0.345	0.5	1.39766e-09	0.69
Cep290	1.99036e-05	-0.324329	0.169	0.245	0.352651	0.689796
Mthfd1	0.00108765	-0.263928	0.12	0.174	1	0.689655
Slc1a2	4.27096e-24	-0.856513	0.435	0.631	7.56729e-20	0.689382
Nr2c1	1.0579e-06	-0.289931	0.153	0.222	0.0187439	0.689189
Eif4a1	5.28167e-07	-0.36203	0.186	0.27	0.00935807	0.688889
Gtpbp4	0.00465565	-0.268916	0.128	0.186	1	0.688172
Pms1	0.000382069	-0.261686	0.13	0.189	1	0.68783
Pola1	3.66451e-14	-0.765558	0.359	0.522	6.49277e-10	0.687739
Nup155	5.54182e-06	-0.321961	0.185	0.269	0.0981899	0.687732
Gab2	0.000104119	-0.402077	0.156	0.227	1	0.687224
Tshz3	8.38225e-09	-0.432428	0.215	0.314	0.000148517	0.684713
Sgms1	8.85519e-05	-0.550907	0.178	0.26	1	0.684615
Etf1	0.0174387	-0.320966	0.167	0.244	1	0.684426
Raly	1.91546e-08	-0.408238	0.234	0.342	0.000339381	0.68421
Tshz2	1.69733e-47	-1.04966	0.532	0.779	3.00733e-43	0.682927
Rack1	0.182012	-0.25761	0.114	0.167	1	0.682634
Fads2	0.000116443	-0.284642	0.146	0.214	1	0.682243
Ptbp1	1.46598e-10	-0.367679	0.193	0.283	2.59742e-06	0.681979
Ptma	8.57322e-09	-0.490742	0.257	0.377	0.0001519	0.681697
Firre	0.00120118	-0.297548	0.137	0.201	1	0.681592
mt-Co1	1.5324e-07	-0.45654	0.229	0.336	0.0027151	0.681547
E2f3	4.5538e-11	-0.53869	0.278	0.408	8.06842e-07	0.681372
Esf1	0.000213488	-0.266464	0.124	0.182	1	0.681318
Epha5	0.00360248	-0.380207	0.141	0.207	1	0.681159
Vps13a	4.27964e-06	-0.329003	0.175	0.257	0.0758267	0.680934
Ctnna1	2.47261e-10	-0.447014	0.224	0.329	4.38097e-06	0.680851
Hspa9	0.000262179	-0.285021	0.145	0.213	1	0.680751
Nucks1	1.92617e-10	-0.497691	0.249	0.366	3.41279e-06	0.680328
Trpm3	1.55269e-05	-0.986369	0.151	0.222	0.275105	0.68018
Ybx1	0.0160391	-0.311438	0.153	0.225	1	0.68
G2e3	1.19742e-06	-0.518013	0.24	0.353	0.0212159	0.679886
Fgfr1	0.00504572	-0.252413	0.125	0.184	1	0.679347
Ttll4	2.36992e-05	-0.363289	0.199	0.293	0.419903	0.679181
Phka1	3.09764e-05	-0.255711	0.133	0.196	0.548841	0.678571
Cct2	0.194199	-0.292327	0.139	0.205	1	0.678048
Nr3c1	3.13956e-07	-0.377627	0.183	0.27	0.00556268	0.677778
Mcm7	0.000417324	-0.295136	0.145	0.214	1	0.67757
Acsl3	0.000397083	-0.252168	0.109	0.161	1	0.677018
Stk3	4.01823e-09	-0.567117	0.305	0.451	7.11951e-05	0.676275
Camk1d	1.44155e-05	-0.370198	0.148	0.219	0.255415	0.675799
Tpcn1	7.17717e-12	-0.583147	0.279	0.413	1.27165e-07	0.675545
Paxip1	6.84713e-07	-0.297077	0.158	0.234	0.0121317	0.675213
Cnbp	0.00144797	-0.273376	0.135	0.2	1	0.675
Tmem245	9.63239e-09	-0.372908	0.199	0.295	0.000170667	0.674576
Mrps28	5.26208e-07	-0.297079	0.143	0.212	0.00932336	0.674528
Tmem164	7.28002e-15	-0.451506	0.23	0.341	1.28987e-10	0.674487
Lima1	0.00774985	-0.25756	0.116	0.172	1	0.674418
Dcbld2	0.00028703	-0.357404	0.155	0.23	1	0.673913
Nrn1	2.20264e-07	-0.395715	0.159	0.236	0.00390264	0.673729
Smo	0.000977986	-0.284038	0.134	0.199	1	0.673366
Ccdc34	0.00235718	-0.292715	0.14	0.208	1	0.673077
Mir9-3hg	4.4702e-13	-0.594356	0.31	0.461	7.9203e-09	0.672451
Srsf10	1.24939e-08	-0.380809	0.205	0.305	0.000221367	0.672131
Dnmt1	1.28757e-05	-0.436122	0.211	0.314	0.228131	0.671974
Canx	9.32868e-10	-0.488724	0.256	0.381	1.65286e-05	0.671916
Cep128	5.72374e-08	-0.558043	0.257	0.383	0.00101413	0.671018
Parp1	0.012708	-0.273638	0.132	0.197	1	0.67005
Parva	4.53627e-06	-0.328505	0.138	0.206	0.0803736	0.669903
Rmst	0.00051425	-0.552678	0.18	0.269	1	0.669145
Angpt1	0.0203003	-0.285338	0.101	0.151	1	0.668874
Sp1	8.1766e-08	-0.306355	0.161	0.241	0.00144873	0.66805
Med12l	1.51959e-13	-0.703012	0.332	0.497	2.69242e-09	0.668008
Trps1	4.05749e-24	-0.770117	0.404	0.605	7.18905e-20	0.667768
Stt3b	1.49436e-11	-0.468572	0.234	0.351	2.64771e-07	0.666666
Rpl13a	7.25308e-07	-0.336089	0.15	0.225	0.012851	0.666666
Nolc1	0.000774005	-0.269066	0.114	0.171	1	0.666666
Man1c1	3.28427e-57	-1.1016	0.521	0.782	5.81906e-53	0.66624
Rbms3	2.18076e-07	-0.674317	0.259	0.389	0.00386387	0.66581
Gng12	9.8713e-12	-0.516919	0.247	0.371	1.749e-07	0.665768
Npm1	5.50303e-08	-0.414639	0.181	0.272	0.000975027	0.665441
Terf1	6.28498e-05	-0.281301	0.139	0.209	1	0.665071
Adgrg1	1.27597e-11	-0.554143	0.24	0.361	2.26077e-07	0.66482
Cep97	0.00473051	-0.258923	0.115	0.173	1	0.66474
Dcakd	0.000469422	-0.250941	0.107	0.161	1	0.664596
Mb21d2	2.31357e-07	-0.39784	0.174	0.262	0.00409919	0.664122
Zfp516	4.46439e-06	-0.365359	0.16	0.241	0.0791	0.6639
Khsrp	0.00241413	-0.28518	0.13	0.196	1	0.663265
Odf2l	3.02163e-05	-0.257933	0.116	0.175	0.535373	0.662857
Bcas1	1.6351e-08	-0.66518	0.222	0.335	0.000289706	0.662686
Ntrk3	5.01039e-62	-1.27247	0.55	0.83	8.87742e-58	0.662651
Dek	6.78098e-11	-0.518301	0.237	0.358	1.20145e-06	0.662011
Plxnb1	0.000143628	-0.325713	0.139	0.21	1	0.661904
Pcbp4	0.000521204	-0.285001	0.139	0.21	1	0.661904
Bcar3	0.000828969	-0.311443	0.119	0.18	1	0.661111
Traf3	2.98292e-05	-0.346107	0.157	0.238	0.528514	0.659664
Bcar1	6.67991e-07	-0.401592	0.188	0.285	0.0118355	0.659649
Lamp2	0.000851373	-0.281267	0.141	0.214	1	0.658878
Hmgb1	4.55974e-08	-0.404964	0.193	0.293	0.000807895	0.658703
Tango6	0.00248208	-0.253911	0.106	0.161	1	0.658385
Arhgap26	9.54499e-08	-0.425833	0.129	0.196	0.00169118	0.658163
Rbbp7	0.00222074	-0.291706	0.127	0.193	1	0.658031
Gatad2a	4.41465e-06	-0.340331	0.148	0.225	0.0782188	0.657777
Lbr	3.24649e-05	-0.309937	0.161	0.245	0.575213	0.657143
Cse1l	0.0149595	-0.282855	0.134	0.204	1	0.656862
Cntln	3.55669e-09	-0.505432	0.24	0.366	6.30174e-05	0.655738
Pold3	0.0093025	-0.329939	0.139	0.212	1	0.65566
Cep83	4.52081e-09	-0.505409	0.247	0.377	8.00997e-05	0.655172
Calr	0.000562887	-0.322013	0.15	0.229	1	0.655022
Cdyl	8.77801e-05	-0.461278	0.216	0.33	1	0.654545
Sipa1l1	4.96327e-06	-0.276007	0.119	0.182	0.0879392	0.653846
Pdia3	7.54714e-05	-0.287435	0.132	0.202	1	0.653465
Taf1d	6.33152e-13	-0.54069	0.243	0.372	1.12182e-08	0.653226
Tor1aip2	0.000137566	-0.257869	0.113	0.173	1	0.653179
Tle1	3.13209e-16	-0.71362	0.354	0.542	5.54944e-12	0.653136
Rsl1d1	1.48412e-05	-0.282169	0.111	0.17	0.262956	0.652941
mt-Nd2	0.000916322	-0.313203	0.141	0.216	1	0.652777
Atad5	2.2906e-07	-0.500121	0.201	0.308	0.00405849	0.652597
Cep192	1.94405e-05	-0.448712	0.201	0.308	0.344447	0.652597
Msi1	3.53923e-05	-0.407738	0.174	0.267	0.627081	0.651685
Kiz	3.25195e-06	-0.297755	0.125	0.192	0.057618	0.651041
Pdap1	0.00631251	-0.302592	0.125	0.192	1	0.651041
Ncapd2	1.25514e-08	-0.507627	0.207	0.318	0.000222386	0.650943
Tmem132e	0.000181239	-0.353124	0.11	0.169	1	0.650887
Ccdc88c	1.81346e-10	-0.481444	0.188	0.289	3.21308e-06	0.650519
Cdk2ap1	0.00652971	-0.251291	0.106	0.163	1	0.650306
Utp20	0.000773821	-0.29441	0.119	0.183	1	0.650273
Eef1a1	1.55987e-12	-0.542705	0.243	0.374	2.76378e-08	0.649732
Sfrp1	2.439e-16	-0.69522	0.314	0.484	4.32141e-12	0.64876
Etv6	8.66839e-10	-0.61623	0.264	0.407	1.53587e-05	0.648648
Dusp16	1.84046e-07	-0.343823	0.149	0.23	0.00326093	0.647826
Phactr4	4.36558e-09	-0.371754	0.171	0.264	7.73494e-05	0.647727
Lsg1	7.33327e-06	-0.27478	0.112	0.173	0.129931	0.647398
Xrcc5	5.00033e-08	-0.403265	0.17	0.263	0.000885959	0.646388
Eefsec	0.000421662	-0.350971	0.137	0.212	1	0.646226
Sdccag8	1.29819e-08	-0.401676	0.188	0.291	0.000230014	0.646048
U2af2	2.94012e-06	-0.38644	0.171	0.265	0.0520931	0.645283
Ctnnb1	3.30902e-05	-0.428461	0.183	0.284	0.586293	0.644366
mt-Nd1	1.99392e-06	-0.366901	0.17	0.264	0.0353283	0.643939
Ddx21	4.69176e-05	-0.309085	0.119	0.185	0.831286	0.643243
Alkbh1	1.85861e-05	-0.361851	0.155	0.241	0.329309	0.643153
Blm	0.000173386	-0.380635	0.164	0.255	1	0.643137
Tmem196	1.54295e-05	-0.345361	0.117	0.182	0.27338	0.642857
Rbbp8	1.00216e-06	-0.320576	0.133	0.207	0.0177562	0.642512
Sdk1	1.42735e-38	-1.20927	0.443	0.69	2.52899e-34	0.642029
Bcl11a	3.0948e-12	-0.636946	0.277	0.432	5.48337e-08	0.641204
Dph6	0.00474262	-0.364663	0.141	0.22	1	0.640909
Ift74	3.40021e-05	-0.252776	0.107	0.167	0.60245	0.640718
Ssbp2	3.6105e-31	-0.83161	0.367	0.573	6.39708e-27	0.640489
Hsp90b1	5.36517e-10	-0.53249	0.235	0.367	9.50601e-06	0.640327
Ybx3	4.37088e-06	-0.3515	0.135	0.211	0.0774432	0.63981
Cenpv	0.00117928	-0.306207	0.115	0.18	1	0.638889
Itsn2	0.000942088	-0.37551	0.143	0.224	1	0.638393
Lig1	3.4339e-05	-0.406113	0.141	0.221	0.608419	0.638009
Znrf3	2.60789e-18	-0.668678	0.287	0.45	4.62066e-14	0.637778
Ndst1	0.000621391	-0.255362	0.102	0.16	1	0.6375
Shroom4	3.53709e-06	-0.36081	0.142	0.223	0.0626701	0.636771
Klhl13	1.71826e-08	-0.321958	0.119	0.187	0.000304442	0.636363
Fmnl3	0.0139635	-0.254127	0.098	0.154	1	0.636363
Adk	2.10506e-16	-0.668664	0.302	0.475	3.72975e-12	0.635789
Tmem163	4.59437e-33	-1.23183	0.413	0.65	8.14031e-29	0.635385
Slc29a1	1.90623e-16	-0.626225	0.249	0.392	3.37746e-12	0.635204
Rpsa	0.0220275	-0.350191	0.127	0.2	1	0.635
Tgfbr1	1.78716e-05	-0.522505	0.205	0.323	0.316649	0.634675
Myh9	1.9345e-05	-0.332016	0.099	0.156	0.342754	0.634615
Grin3a	1.4831e-06	-0.443278	0.151	0.238	0.0262776	0.634454
Gria3	1.27866e-08	-0.618542	0.241	0.38	0.000226554	0.63421
Ccdc57	0.000192903	-0.251624	0.095	0.15	1	0.633333
Pam	1.5953e-06	-0.466629	0.195	0.308	0.0282656	0.633117
Lrrc58	5.4717e-07	-0.414459	0.176	0.278	0.00969475	0.633093
Wdhd1	0.00125624	-0.306074	0.105	0.166	1	0.63253
Cyp7b1	4.58074e-07	-0.45201	0.165	0.261	0.00811615	0.632184
Vrk1	8.39776e-05	-0.287315	0.115	0.182	1	0.631868
Rpl4	8.1005e-07	-0.476879	0.185	0.293	0.0143525	0.631399
Pcx	8.83144e-11	-0.371194	0.137	0.217	1.56475e-06	0.631336
Cd63	1.99584e-08	-0.285599	0.101	0.16	0.000353623	0.63125
Pfas	2.31454e-06	-0.278647	0.101	0.16	0.0410091	0.63125
Polr1a	9.28294e-07	-0.282152	0.111	0.176	0.0164475	0.630681
Adgra3	4.77855e-06	-0.512816	0.199	0.316	0.0846663	0.629747
Tom1l1	2.42217e-06	-0.381668	0.141	0.224	0.0429159	0.629464
Alg13	0.00163216	-0.257045	0.103	0.164	1	0.628048
Eef1g	0.0067199	-0.288938	0.108	0.172	1	0.627907
Dpysl4	7.43637e-07	-0.442068	0.167	0.266	0.0131758	0.627819
Cep57	3.98637e-06	-0.259207	0.104	0.166	0.0706305	0.626506
Lama2	9.75404e-08	-0.650377	0.161	0.257	0.00172822	0.626459
Mybbp1a	1.60878e-05	-0.296739	0.109	0.174	0.285043	0.626436
Fkbp5	4.25413e-05	-0.307717	0.109	0.174	0.753747	0.626436
Haus6	8.48123e-06	-0.319059	0.123	0.197	0.15027	0.624365
Boc	5.72401e-36	-1.09691	0.415	0.665	1.01418e-31	0.62406
Hdac9	1.56798e-41	-0.99802	0.441	0.707	2.77815e-37	0.623762
Mdga1	3.60815e-39	-0.998178	0.42	0.674	6.39293e-35	0.623145
Rftn1	2.03376e-21	-0.796747	0.324	0.52	3.60341e-17	0.623077
Pabpc1	1.03067e-08	-0.480407	0.185	0.297	0.000182613	0.622895
Hsph1	0.000966023	-0.294569	0.107	0.172	1	0.622093
Pitpnm2	1.98462e-11	-0.526571	0.194	0.312	3.51634e-07	0.621795
Akap13	1.80466e-25	-0.71541	0.285	0.459	3.19749e-21	0.620915
Homer2	0.00039319	-0.443048	0.162	0.261	1	0.620689
Rrp1b	0.00754071	-0.274529	0.096	0.155	1	0.619354
Rad18	3.09179e-05	-0.365933	0.138	0.223	0.547804	0.618834
Med25	1.09014e-07	-0.28033	0.112	0.181	0.00193151	0.618784
Ipo5	5.59515e-06	-0.360116	0.133	0.215	0.0991348	0.618604
Naca	2.80964e-09	-0.290504	0.107	0.173	4.97812e-05	0.618497
Bckdhb	0.00128439	-0.322501	0.11	0.178	1	0.617977
Ptch2	1.22377e-22	-0.781565	0.289	0.468	2.16828e-18	0.617521
Scd2	1.36993e-06	-0.468061	0.171	0.277	0.0242724	0.617328
Irs1	4.29631e-15	-0.844015	0.323	0.524	7.61219e-11	0.616412
Inpp5a	1.24491e-06	-0.386829	0.146	0.237	0.0220573	0.616033
Orc5	1.27748e-08	-0.257217	0.101	0.164	0.000226345	0.615853
Rcc2	1.65145e-05	-0.310399	0.117	0.19	0.292604	0.615789
Vgll4	1.64778e-13	-0.44938	0.168	0.273	2.91953e-09	0.615384
Lrrc8c	1.10685e-07	-0.305847	0.11	0.179	0.00196112	0.614525
Tln1	6.15785e-06	-0.282593	0.094	0.153	0.109105	0.614379
Hspa5	1.21703e-11	-0.452525	0.167	0.272	2.15633e-07	0.61397
Hat1	1.3659e-05	-0.292128	0.092	0.15	0.242011	0.613333
Grid2ip	1.1547e-07	-0.493235	0.157	0.256	0.00204589	0.613281
Tmpo	6.15936e-16	-0.700029	0.263	0.429	1.09132e-11	0.613053
Rnf4	1.61733e-07	-0.2871	0.109	0.178	0.00286559	0.612359
Mtbp	4.01733e-08	-0.375721	0.131	0.214	0.00071179	0.612149
Nxpe4	8.24129e-17	-0.641391	0.227	0.371	1.46019e-12	0.61186
Wdr35	0.000593235	-0.274256	0.093	0.152	1	0.611842
Pde5a	0.000101663	-0.369082	0.124	0.203	1	0.610837
Taco1	4.50834e-07	-0.41777	0.127	0.208	0.00798787	0.610577
Pik3r1	0.00128008	-0.295094	0.108	0.177	1	0.610169
Asic2	0.00986384	-0.611578	0.097	0.159	1	0.610063
Serinc5	5.74144e-06	-0.541177	0.197	0.323	0.101727	0.609907
Clic4	4.16336e-07	-0.459048	0.161	0.264	0.00737664	0.609848
Snx5	0.000200605	-0.401834	0.137	0.225	1	0.608889
Nop58	1.66032e-09	-0.516474	0.187	0.308	2.94175e-05	0.607143
Zfp277	0.000261735	-0.318781	0.119	0.196	1	0.607143
Mid1	0.000523306	-0.358291	0.119	0.196	1	0.607143
Hells	8.49806e-06	-0.463648	0.139	0.229	0.150569	0.606987
Lpin2	1.03729e-10	-0.617094	0.225	0.371	1.83787e-06	0.606469
Nop56	6.15135e-09	-0.410401	0.151	0.249	0.00010899	0.606425
Sae1	8.60431e-07	-0.454979	0.171	0.282	0.0152451	0.606383
Rpa1	9.64192e-07	-0.305102	0.097	0.16	0.0170836	0.60625
Ccbe1	7.87779e-12	-0.757236	0.198	0.327	1.39579e-07	0.605504
Chsy1	0.000412139	-0.45118	0.155	0.256	1	0.605469
Diaph2	1.79877e-13	-0.726445	0.273	0.451	3.18706e-09	0.605321
Pard3	2.44943e-51	-1.01845	0.423	0.7	4.3399e-47	0.604286
Abcc1	1.12509e-10	-0.373451	0.134	0.222	1.99344e-06	0.603603
Gstcd	1.72377e-07	-0.377205	0.137	0.227	0.00305418	0.603524
Hdgf	0.0101868	-0.309827	0.108	0.179	1	0.603352
Draxin	6.73732e-45	-1.0184	0.369	0.613	1.19372e-40	0.601957
Tex9	1.89564e-05	-0.274913	0.092	0.153	0.33587	0.601307
Ccnd2	2.35237e-27	-0.839126	0.295	0.491	4.16793e-23	0.600815
Tenm3	1.46892e-09	-0.687206	0.213	0.355	2.60263e-05	0.6
Gm26883	5.18901e-09	-0.453871	0.157	0.262	9.1939e-05	0.599236
Unc80	0.00101197	-0.414476	0.121	0.202	1	0.59901
Lin9	0.000182804	-0.262055	0.097	0.162	1	0.598765
Chsy3	0.000125416	-0.388297	0.107	0.179	1	0.597765
Gnl3	1.23912e-07	-0.449933	0.147	0.246	0.00219548	0.597561
Crybg3	1.37124e-12	-0.492105	0.172	0.288	2.42957e-08	0.597222
Cdh4	3.86924e-35	-1.14898	0.337	0.565	6.85551e-31	0.59646
Hpca	5.54732e-08	-0.445818	0.13	0.218	0.000982875	0.59633
Gtf2f2	5.29507e-05	-0.353095	0.125	0.21	0.93818	0.595238
Ece1	4.40521e-05	-0.34886	0.1	0.168	0.780515	0.595238
Gjc1	1.33211e-09	-0.410057	0.141	0.237	2.36024e-05	0.594936
Ebf2	7.4641e-14	-0.76406	0.209	0.352	1.32249e-09	0.59375
Pxdn	5.27076e-05	-0.25434	0.089	0.15	0.933873	0.593333
Pkig	2.91851e-05	-0.336696	0.102	0.172	0.517101	0.593023
Crim1	1.43502e-07	-0.432344	0.112	0.189	0.00254257	0.592592
Notch2	1.8474e-10	-0.372817	0.125	0.211	3.27323e-06	0.592417
Trp53	3.13673e-08	-0.340004	0.109	0.184	0.000555766	0.592391
Palld	0.0478439	-0.370277	0.09	0.152	1	0.592105
Mycn	6.40837e-07	-0.427205	0.129	0.218	0.0113544	0.591743
Prkd1	8.09281e-08	-0.694776	0.204	0.345	0.00143388	0.591304
Rnf219	3.322e-06	-0.342918	0.114	0.193	0.0588592	0.590673
Fscn1	5.0324e-06	-0.317741	0.101	0.171	0.089164	0.590643
Commd1	4.00973e-05	-0.324655	0.105	0.178	0.710444	0.589887
Itga9	7.01547e-05	-0.400377	0.092	0.156	1	0.589743
Cmtm4	3.28749e-12	-0.542204	0.178	0.302	5.82477e-08	0.589404
Nin	5.88555e-20	-0.739628	0.258	0.438	1.0428e-15	0.589041
Mpdz	7.56699e-20	-0.640955	0.23	0.391	1.34072e-15	0.588235
Pa2g4	3.61742e-07	-0.375923	0.124	0.211	0.00640934	0.587677
Arl6ip1	4.99616e-09	-0.46812	0.132	0.225	8.85219e-05	0.586666
Brca2	0.000150399	-0.457331	0.137	0.235	1	0.582978
Mpp5	2.35556e-05	-0.300616	0.092	0.158	0.417358	0.582278
Mms22l	2.42715e-08	-0.601152	0.175	0.301	0.000430043	0.581395
Ctps	6.74978e-08	-0.355595	0.1	0.172	0.00119593	0.581395
Prkd3	1.21416e-11	-0.56208	0.19	0.327	2.15125e-07	0.58104
[truncated: 225 more rows]

## Sheet: cluster 8
gene	p_val	avg_log2FC	fraction + in cluster	fraction + not in cluster	p_val_adj	ratio + in:out of cluster
[truncated: 1,564 more rows]

[truncated: 16 more sheets: cluster 9, cluster 10, cluster 11, cluster 12, cluster 13, cluster 14, cluster 15, cluster 16, cluster 17, cluster 18, cluster 19, cluster 20, cluster 21, cluster 22, cluster 23, cluster 24]
